# Supplementary material for: NOMPC ion channel hinge forms a gating spring that initiates mechanosensation
Source: Springer Nature journal article supplement (doi:10.1038/s41593-024-01849-3), 2025-01-06
Supplement: MOESM1 [file 41593_2024_1849_MOESM1_ESM.pdf › 41593_2024_1849_MOESM1_ESM.pdf]

---

# **NOMPC ion channel hinge forms a gating spring that initiates mechanosensation**

---

In the format provided by the  
authors and unedited

---

|                          |                                | NOMPC::GFP | NOMPC <sup>-/-</sup> | AR+AR-<br>NOMPC::GFP | LH+LH-<br>NOMPC::GFP |
|--------------------------|--------------------------------|------------|----------------------|----------------------|----------------------|
|                          | Sample size<br>(# flies)       | 5          | 22                   | 5                    | 5                    |
| <b>Model<br/>select.</b> | Sample size<br>(# data points) | 133        | 553                  | 107                  | 130                  |
|                          | <i>AICc</i> (1 channel type)   | -1428      | -5492                | -1138                | -1456                |
|                          | <i>AICc</i> (2 channel types)  | -1544      | -5493                | -1232                | -1461                |
|                          | $w_i$ (1 channel type)         | 0          | <b>0.7</b>           | 0                    | 0.1                  |
|                          | $w_i$ (2 channel types)        | <b>1</b>   | 0.3                  | <b>1</b>             | <b>0.9</b>           |
| <b>Fit<br/>param.</b>    | $N_s$                          | 649 ± 106  | -                    | 494 ± 85             | 553 ± 78             |
|                          | $z_s$ (fN)                     | 23 ± 2     | -                    | 24 ± 1               | 11 ± 1<br>***        |
|                          | $N_i$ ( x 10 <sup>3</sup> )    | 59 ± 16    | 24 ± 0.5             | 53 ± 12              | 34 ± 14<br>**        |
|                          | $z_i$ (fN)                     | 3 ± 0      | 3 ± 1                | 3 ± 0                | 3 ± 0                |
|                          | $K_{\infty}$ (μN)              | 78 ± 2     | 63 ± 2<br>***        | 77 ± 2               | 70 ± 2<br>***        |
|                          | $K_{lin}$ (μN)                 | 50 ± 2     | 46 ± 1<br>**         | 52 ± 3               | 49 ± 2               |

**Supplementary Table 1. Gating spring model selection and fit parameter values.** Model selection: Akaike information criterion with corrected sample size (*AICc*) and respective Akaike weights ( $w_i$ ) obtained by fitting the dynamic stiffness of the fly's antennal receiver with gating spring models with one and two channel types. The model that yielded the larger value of  $w_i$  was used (highlighted in bold). Fit parameters: values represent mean ± SEM.  $K_{lin}$  was measured directly, independent of the fits. Asterisks indicate significant differences from NOMPC::GFP controls (\*\*:  $p < 0.01$ ; \*\*\*:  $p < 0.001$ , two-tailed Mann-Whitney U-tests with Bonferroni correction). For respective model equations, see [Methods](#).

| system                                      | force applied on | force constant (kJ/(mol nm <sup>2</sup> )) | force value (kJ/(mol nm)) | pulling rate (nm/ps)  | position restrained of | simulation time (ns) × # of replicates |
|---------------------------------------------|------------------|--------------------------------------------|---------------------------|-----------------------|------------------------|----------------------------------------|
| Conformational changes under external force |                  |                                            |                           |                       |                        |                                        |
| TMD+LH+5ARs (ARs25-29)                      | -                | -                                          | -                         | -                     | -                      | 100×3                                  |
|                                             | AR25             | 5000                                       | /                         | 1.5×10 <sup>-5</sup>  | -                      |                                        |
|                                             |                  |                                            |                           | -1.5×10 <sup>-5</sup> |                        |                                        |
| Spring constant calculation                 |                  |                                            |                           |                       |                        |                                        |
| TMD+LH+5AR (ARs25-29) system a              | -                | -                                          | -                         | -                     | -                      | 100×3                                  |
|                                             | AR25             | -                                          | 30                        | -                     | TRP+S6                 |                                        |
|                                             |                  |                                            | 60                        |                       |                        |                                        |
|                                             |                  |                                            | -30                       |                       |                        |                                        |
|                                             |                  |                                            | -60                       |                       |                        |                                        |
| LH+26ARs (ARs4-29) system b                 | -                | -                                          | -                         | -                     | -                      | 100×3                                  |
|                                             | AR4              | /                                          | 20                        | -                     | LH                     |                                        |
|                                             |                  | /                                          | 30                        |                       |                        |                                        |
|                                             |                  | /                                          | -10                       |                       |                        |                                        |
|                                             |                  | /                                          | -20                       |                       |                        |                                        |
|                                             |                  | /                                          | -30                       |                       |                        |                                        |
|                                             | AR25             | /                                          | 60                        | -                     | LH                     |                                        |
|                                             |                  | /                                          | -30                       |                       |                        |                                        |
|                                             |                  | /                                          | -60                       |                       |                        |                                        |

**Supplementary Table 2. Simulations performed in this work.**
