# Supplementary material for: NOMPC ion channel hinge forms a gating spring that initiates mechanosensation
Source: Springer Nature journal article supplement (doi:10.1038/s41593-024-01849-3), 2025-01-06
Supplement: MOESM8 [file 41593_2024_1849_MOESM8_ESM.xlsx]

## Sheet: Figure_2_a_to_d_fits
genotype_long	genotype	displacement_nm	norm_CAP
w*;nompC[3],UAS-NompC::GFP/nompC[3];nompC-GAL4	NOMPC:GFP	-14836	0.99991
w*;nompC[3],UAS-NompC::GFP/nompC[3];nompC-GAL4	NOMPC:GFP	-13851.6	0.99984
w*;nompC[3],UAS-NompC::GFP/nompC[3];nompC-GAL4	NOMPC:GFP	-13642.2	0.99982
w*;nompC[3],UAS-NompC::GFP/nompC[3];nompC-GAL4	NOMPC:GFP	-13558.9	0.99981
w*;nompC[3],UAS-NompC::GFP/nompC[3];nompC-GAL4	NOMPC:GFP	-13544	0.99981
w*;nompC[3],UAS-NompC::GFP/nompC[3];nompC-GAL4	NOMPC:GFP	-13529.2	0.9998
w*;nompC[3],UAS-NompC::GFP/nompC[3];nompC-GAL4	NOMPC:GFP	-13514.3	0.9998
w*;nompC[3],UAS-NompC::GFP/nompC[3];nompC-GAL4	NOMPC:GFP	-13499.5	0.9998
w*;nompC[3],UAS-NompC::GFP/nompC[3];nompC-GAL4	NOMPC:GFP	-13484.6	0.9998
w*;nompC[3],UAS-NompC::GFP/nompC[3];nompC-GAL4	NOMPC:GFP	-13469.8	0.9998
w*;nompC[3],UAS-NompC::GFP/nompC[3];nompC-GAL4	NOMPC:GFP	-13454.9	0.9998
w*;nompC[3],UAS-NompC::GFP/nompC[3];nompC-GAL4	NOMPC:GFP	-13440.1	0.99979
w*;nompC[3],UAS-NompC::GFP/nompC[3];nompC-GAL4	NOMPC:GFP	-13425.2	0.99979
w*;nompC[3],UAS-NompC::GFP/nompC[3];nompC-GAL4	NOMPC:GFP	-13410.4	0.99979
w*;nompC[3],UAS-NompC::GFP/nompC[3];nompC-GAL4	NOMPC:GFP	-13395.5	0.99979
w*;nompC[3],UAS-NompC::GFP/nompC[3];nompC-GAL4	NOMPC:GFP	-13380.7	0.99979
w*;nompC[3],UAS-NompC::GFP/nompC[3];nompC-GAL4	NOMPC:GFP	-13365.8	0.99978
w*;nompC[3],UAS-NompC::GFP/nompC[3];nompC-GAL4	NOMPC:GFP	-13351	0.99978
w*;nompC[3],UAS-NompC::GFP/nompC[3];nompC-GAL4	NOMPC:GFP	-13336.1	0.99978
w*;nompC[3],UAS-NompC::GFP/nompC[3];nompC-GAL4	NOMPC:GFP	-13321.3	0.99978
w*;nompC[3],UAS-NompC::GFP/nompC[3];nompC-GAL4	NOMPC:GFP	-13306.4	0.99978
w*;nompC[3],UAS-NompC::GFP/nompC[3];nompC-GAL4	NOMPC:GFP	-13291.6	0.99977
w*;nompC[3],UAS-NompC::GFP/nompC[3];nompC-GAL4	NOMPC:GFP	-13276.7	0.99977
w*;nompC[3],UAS-NompC::GFP/nompC[3];nompC-GAL4	NOMPC:GFP	-13261.9	0.99977
w*;nompC[3],UAS-NompC::GFP/nompC[3];nompC-GAL4	NOMPC:GFP	-13247	0.99977
w*;nompC[3],UAS-NompC::GFP/nompC[3];nompC-GAL4	NOMPC:GFP	-13232.1	0.99976
w*;nompC[3],UAS-NompC::GFP/nompC[3];nompC-GAL4	NOMPC:GFP	-13217.3	0.99976
w*;nompC[3],UAS-NompC::GFP/nompC[3];nompC-GAL4	NOMPC:GFP	-13202.4	0.99976
w*;nompC[3],UAS-NompC::GFP/nompC[3];nompC-GAL4	NOMPC:GFP	-13187.6	0.99976
w*;nompC[3],UAS-NompC::GFP/nompC[3];nompC-GAL4	NOMPC:GFP	-13172.7	0.99976
w*;nompC[3],UAS-NompC::GFP/nompC[3];nompC-GAL4	NOMPC:GFP	-13157.9	0.99975
w*;nompC[3],UAS-NompC::GFP/nompC[3];nompC-GAL4	NOMPC:GFP	-13143	0.99975
w*;nompC[3],UAS-NompC::GFP/nompC[3];nompC-GAL4	NOMPC:GFP	-13128.2	0.99975
w*;nompC[3],UAS-NompC::GFP/nompC[3];nompC-GAL4	NOMPC:GFP	-13113.3	0.99975
w*;nompC[3],UAS-NompC::GFP/nompC[3];nompC-GAL4	NOMPC:GFP	-13098.5	0.99974
w*;nompC[3],UAS-NompC::GFP/nompC[3];nompC-GAL4	NOMPC:GFP	-13083.6	0.99974
w*;nompC[3],UAS-NompC::GFP/nompC[3];nompC-GAL4	NOMPC:GFP	-13068.8	0.99974
w*;nompC[3],UAS-NompC::GFP/nompC[3];nompC-GAL4	NOMPC:GFP	-13053.9	0.99974
w*;nompC[3],UAS-NompC::GFP/nompC[3];nompC-GAL4	NOMPC:GFP	-13039.1	0.99973
w*;nompC[3],UAS-NompC::GFP/nompC[3];nompC-GAL4	NOMPC:GFP	-13024.2	0.99973
w*;nompC[3],UAS-NompC::GFP/nompC[3];nompC-GAL4	NOMPC:GFP	-13009.4	0.99973
w*;nompC[3],UAS-NompC::GFP/nompC[3];nompC-GAL4	NOMPC:GFP	-12994.5	0.99973
w*;nompC[3],UAS-NompC::GFP/nompC[3];nompC-GAL4	NOMPC:GFP	-12979.7	0.99972
w*;nompC[3],UAS-NompC::GFP/nompC[3];nompC-GAL4	NOMPC:GFP	-12964.8	0.99972
w*;nompC[3],UAS-NompC::GFP/nompC[3];nompC-GAL4	NOMPC:GFP	-12950	0.99972
w*;nompC[3],UAS-NompC::GFP/nompC[3];nompC-GAL4	NOMPC:GFP	-12935.1	0.99972
w*;nompC[3],UAS-NompC::GFP/nompC[3];nompC-GAL4	NOMPC:GFP	-12920.3	0.99971
w*;nompC[3],UAS-NompC::GFP/nompC[3];nompC-GAL4	NOMPC:GFP	-12905.4	0.99971
w*;nompC[3],UAS-NompC::GFP/nompC[3];nompC-GAL4	NOMPC:GFP	-12890.6	0.99971
w*;nompC[3],UAS-NompC::GFP/nompC[3];nompC-GAL4	NOMPC:GFP	-12875.7	0.9997
w*;nompC[3],UAS-NompC::GFP/nompC[3];nompC-GAL4	NOMPC:GFP	-12860.9	0.9997
w*;nompC[3],UAS-NompC::GFP/nompC[3];nompC-GAL4	NOMPC:GFP	-12846	0.9997
w*;nompC[3],UAS-NompC::GFP/nompC[3];nompC-GAL4	NOMPC:GFP	-12831.2	0.9997
w*;nompC[3],UAS-NompC::GFP/nompC[3];nompC-GAL4	NOMPC:GFP	-12816.3	0.99969
w*;nompC[3],UAS-NompC::GFP/nompC[3];nompC-GAL4	NOMPC:GFP	-12801.5	0.99969
w*;nompC[3],UAS-NompC::GFP/nompC[3];nompC-GAL4	NOMPC:GFP	-12786.6	0.99969
w*;nompC[3],UAS-NompC::GFP/nompC[3];nompC-GAL4	NOMPC:GFP	-12771.8	0.99968
w*;nompC[3],UAS-NompC::GFP/nompC[3];nompC-GAL4	NOMPC:GFP	-12756.9	0.99968
w*;nompC[3],UAS-NompC::GFP/nompC[3];nompC-GAL4	NOMPC:GFP	-12742.1	0.99968
w*;nompC[3],UAS-NompC::GFP/nompC[3];nompC-GAL4	NOMPC:GFP	-12727.2	0.99968
w*;nompC[3],UAS-NompC::GFP/nompC[3];nompC-GAL4	NOMPC:GFP	-12712.4	0.99967
w*;nompC[3],UAS-NompC::GFP/nompC[3];nompC-GAL4	NOMPC:GFP	-12697.5	0.99967
w*;nompC[3],UAS-NompC::GFP/nompC[3];nompC-GAL4	NOMPC:GFP	-12682.7	0.99967
w*;nompC[3],UAS-NompC::GFP/nompC[3];nompC-GAL4	NOMPC:GFP	-12667.8	0.99966
w*;nompC[3],UAS-NompC::GFP/nompC[3];nompC-GAL4	NOMPC:GFP	-12653	0.99966
w*;nompC[3],UAS-NompC::GFP/nompC[3];nompC-GAL4	NOMPC:GFP	-12638.1	0.99966
w*;nompC[3],UAS-NompC::GFP/nompC[3];nompC-GAL4	NOMPC:GFP	-12623.3	0.99965
w*;nompC[3],UAS-NompC::GFP/nompC[3];nompC-GAL4	NOMPC:GFP	-12608.4	0.99965
w*;nompC[3],UAS-NompC::GFP/nompC[3];nompC-GAL4	NOMPC:GFP	-12593.6	0.99965
w*;nompC[3],UAS-NompC::GFP/nompC[3];nompC-GAL4	NOMPC:GFP	-12578.7	0.99964
w*;nompC[3],UAS-NompC::GFP/nompC[3];nompC-GAL4	NOMPC:GFP	-12563.9	0.99964
w*;nompC[3],UAS-NompC::GFP/nompC[3];nompC-GAL4	NOMPC:GFP	-12549	0.99964
w*;nompC[3],UAS-NompC::GFP/nompC[3];nompC-GAL4	NOMPC:GFP	-12534.2	0.99963
w*;nompC[3],UAS-NompC::GFP/nompC[3];nompC-GAL4	NOMPC:GFP	-12519.3	0.99963
w*;nompC[3],UAS-NompC::GFP/nompC[3];nompC-GAL4	NOMPC:GFP	-12504.5	0.99963
w*;nompC[3],UAS-NompC::GFP/nompC[3];nompC-GAL4	NOMPC:GFP	-12489.6	0.99962
w*;nompC[3],UAS-NompC::GFP/nompC[3];nompC-GAL4	NOMPC:GFP	-12474.8	0.99962
w*;nompC[3],UAS-NompC::GFP/nompC[3];nompC-GAL4	NOMPC:GFP	-12459.9	0.99962
w*;nompC[3],UAS-NompC::GFP/nompC[3];nompC-GAL4	NOMPC:GFP	-12445.1	0.99961
w*;nompC[3],UAS-NompC::GFP/nompC[3];nompC-GAL4	NOMPC:GFP	-12430.2	0.99961
w*;nompC[3],UAS-NompC::GFP/nompC[3];nompC-GAL4	NOMPC:GFP	-12415.4	0.99961
w*;nompC[3],UAS-NompC::GFP/nompC[3];nompC-GAL4	NOMPC:GFP	-12400.5	0.9996
w*;nompC[3],UAS-NompC::GFP/nompC[3];nompC-GAL4	NOMPC:GFP	-12385.6	0.9996
w*;nompC[3],UAS-NompC::GFP/nompC[3];nompC-GAL4	NOMPC:GFP	-12370.8	0.99959
w*;nompC[3],UAS-NompC::GFP/nompC[3];nompC-GAL4	NOMPC:GFP	-12355.9	0.99959
w*;nompC[3],UAS-NompC::GFP/nompC[3];nompC-GAL4	NOMPC:GFP	-12341.1	0.99959
w*;nompC[3],UAS-NompC::GFP/nompC[3];nompC-GAL4	NOMPC:GFP	-12326.2	0.99958
w*;nompC[3],UAS-NompC::GFP/nompC[3];nompC-GAL4	NOMPC:GFP	-12319.4	0.99958
w*;nompC[3],UAS-NompC::GFP/nompC[3];nompC-GAL4	NOMPC:GFP	-12311.4	0.99958
w*;nompC[3],UAS-NompC::GFP/nompC[3];nompC-GAL4	NOMPC:GFP	-12296.5	0.99957
w*;nompC[3],UAS-NompC::GFP/nompC[3];nompC-GAL4	NOMPC:GFP	-12281.7	0.99957
w*;nompC[3],UAS-NompC::GFP/nompC[3];nompC-GAL4	NOMPC:GFP	-12266.8	0.99957
w*;nompC[3],UAS-NompC::GFP/nompC[3];nompC-GAL4	NOMPC:GFP	-12252	0.99956
w*;nompC[3],UAS-NompC::GFP/nompC[3];nompC-GAL4	NOMPC:GFP	-12237.1	0.99956
w*;nompC[3],UAS-NompC::GFP/nompC[3];nompC-GAL4	NOMPC:GFP	-12222.3	0.99955
w*;nompC[3],UAS-NompC::GFP/nompC[3];nompC-GAL4	NOMPC:GFP	-12207.4	0.99955
w*;nompC[3],UAS-NompC::GFP/nompC[3];nompC-GAL4	NOMPC:GFP	-12192.6	0.99955
w*;nompC[3],UAS-NompC::GFP/nompC[3];nompC-GAL4	NOMPC:GFP	-12177.7	0.99954
w*;nompC[3],UAS-NompC::GFP/nompC[3];nompC-GAL4	NOMPC:GFP	-12162.9	0.99954
w*;nompC[3],UAS-NompC::GFP/nompC[3];nompC-GAL4	NOMPC:GFP	-12148	0.99953
w*;nompC[3],UAS-NompC::GFP/nompC[3];nompC-GAL4	NOMPC:GFP	-12133.2	0.99953
w*;nompC[3],UAS-NompC::GFP/nompC[3];nompC-GAL4	NOMPC:GFP	-12118.3	0.99952
w*;nompC[3],UAS-NompC::GFP/nompC[3];nompC-GAL4	NOMPC:GFP	-12103.5	0.99952
w*;nompC[3],UAS-NompC::GFP/nompC[3];nompC-GAL4	NOMPC:GFP	-12088.6	0.99951
w*;nompC[3],UAS-NompC::GFP/nompC[3];nompC-GAL4	NOMPC:GFP	-12073.8	0.99951
w*;nompC[3],UAS-NompC::GFP/nompC[3];nompC-GAL4	NOMPC:GFP	-12058.9	0.99951
w*;nompC[3],UAS-NompC::GFP/nompC[3];nompC-GAL4	NOMPC:GFP	-12044.1	0.9995
w*;nompC[3],UAS-NompC::GFP/nompC[3];nompC-GAL4	NOMPC:GFP	-12029.2	0.9995
w*;nompC[3],UAS-NompC::GFP/nompC[3];nompC-GAL4	NOMPC:GFP	-12014.4	0.99949
w*;nompC[3],UAS-NompC::GFP/nompC[3];nompC-GAL4	NOMPC:GFP	-11999.5	0.99949
w*;nompC[3],UAS-NompC::GFP/nompC[3];nompC-GAL4	NOMPC:GFP	-11984.7	0.99948
w*;nompC[3],UAS-NompC::GFP/nompC[3];nompC-GAL4	NOMPC:GFP	-11969.8	0.99948
w*;nompC[3],UAS-NompC::GFP/nompC[3];nompC-GAL4	NOMPC:GFP	-11955	0.99947
w*;nompC[3],UAS-NompC::GFP/nompC[3];nompC-GAL4	NOMPC:GFP	-11940.1	0.99947
w*;nompC[3],UAS-NompC::GFP/nompC[3];nompC-GAL4	NOMPC:GFP	-11925.3	0.99946
w*;nompC[3],UAS-NompC::GFP/nompC[3];nompC-GAL4	NOMPC:GFP	-11910.4	0.99946
w*;nompC[3],UAS-NompC::GFP/nompC[3];nompC-GAL4	NOMPC:GFP	-11895.6	0.99945
w*;nompC[3],UAS-NompC::GFP/nompC[3];nompC-GAL4	NOMPC:GFP	-11880.7	0.99945
w*;nompC[3],UAS-NompC::GFP/nompC[3];nompC-GAL4	NOMPC:GFP	-11865.9	0.99944
w*;nompC[3],UAS-NompC::GFP/nompC[3];nompC-GAL4	NOMPC:GFP	-11851	0.99944
w*;nompC[3],UAS-NompC::GFP/nompC[3];nompC-GAL4	NOMPC:GFP	-11836.2	0.99943
w*;nompC[3],UAS-NompC::GFP/nompC[3];nompC-GAL4	NOMPC:GFP	-11821.3	0.99942
w*;nompC[3],UAS-NompC::GFP/nompC[3];nompC-GAL4	NOMPC:GFP	-11806.5	0.99942
w*;nompC[3],UAS-NompC::GFP/nompC[3];nompC-GAL4	NOMPC:GFP	-11791.6	0.99941
w*;nompC[3],UAS-NompC::GFP/nompC[3];nompC-GAL4	NOMPC:GFP	-11776.8	0.99941
w*;nompC[3],UAS-NompC::GFP/nompC[3];nompC-GAL4	NOMPC:GFP	-11761.9	0.9994
w*;nompC[3],UAS-NompC::GFP/nompC[3];nompC-GAL4	NOMPC:GFP	-11747.1	0.9994
w*;nompC[3],UAS-NompC::GFP/nompC[3];nompC-GAL4	NOMPC:GFP	-11732.2	0.99939
w*;nompC[3],UAS-NompC::GFP/nompC[3];nompC-GAL4	NOMPC:GFP	-11717.4	0.99939
w*;nompC[3],UAS-NompC::GFP/nompC[3];nompC-GAL4	NOMPC:GFP	-11702.5	0.99938
w*;nompC[3],UAS-NompC::GFP/nompC[3];nompC-GAL4	NOMPC:GFP	-11687.7	0.99937
w*;nompC[3],UAS-NompC::GFP/nompC[3];nompC-GAL4	NOMPC:GFP	-11672.8	0.99937
w*;nompC[3],UAS-NompC::GFP/nompC[3];nompC-GAL4	NOMPC:GFP	-11658	0.99936
w*;nompC[3],UAS-NompC::GFP/nompC[3];nompC-GAL4	NOMPC:GFP	-11643.1	0.99936
w*;nompC[3],UAS-NompC::GFP/nompC[3];nompC-GAL4	NOMPC:GFP	-11628.3	0.99935
w*;nompC[3],UAS-NompC::GFP/nompC[3];nompC-GAL4	NOMPC:GFP	-11613.4	0.99934
w*;nompC[3],UAS-NompC::GFP/nompC[3];nompC-GAL4	NOMPC:GFP	-11598.6	0.99934
w*;nompC[3],UAS-NompC::GFP/nompC[3];nompC-GAL4	NOMPC:GFP	-11583.7	0.99933
w*;nompC[3],UAS-NompC::GFP/nompC[3];nompC-GAL4	NOMPC:GFP	-11568.8	0.99932
w*;nompC[3],UAS-NompC::GFP/nompC[3];nompC-GAL4	NOMPC:GFP	-11554	0.99932
w*;nompC[3],UAS-NompC::GFP/nompC[3];nompC-GAL4	NOMPC:GFP	-11539.1	0.99931
w*;nompC[3],UAS-NompC::GFP/nompC[3];nompC-GAL4	NOMPC:GFP	-11524.3	0.99931
w*;nompC[3],UAS-NompC::GFP/nompC[3];nompC-GAL4	NOMPC:GFP	-11509.4	0.9993
w*;nompC[3],UAS-NompC::GFP/nompC[3];nompC-GAL4	NOMPC:GFP	-11494.6	0.99929
w*;nompC[3],UAS-NompC::GFP/nompC[3];nompC-GAL4	NOMPC:GFP	-11479.7	0.99929
w*;nompC[3],UAS-NompC::GFP/nompC[3];nompC-GAL4	NOMPC:GFP	-11464.9	0.99928
w*;nompC[3],UAS-NompC::GFP/nompC[3];nompC-GAL4	NOMPC:GFP	-11450	0.99927
w*;nompC[3],UAS-NompC::GFP/nompC[3];nompC-GAL4	NOMPC:GFP	-11435.2	0.99927
w*;nompC[3],UAS-NompC::GFP/nompC[3];nompC-GAL4	NOMPC:GFP	-11420.3	0.99926
w*;nompC[3],UAS-NompC::GFP/nompC[3];nompC-GAL4	NOMPC:GFP	-11405.5	0.99925
w*;nompC[3],UAS-NompC::GFP/nompC[3];nompC-GAL4	NOMPC:GFP	-11390.6	0.99924
w*;nompC[3],UAS-NompC::GFP/nompC[3];nompC-GAL4	NOMPC:GFP	-11375.8	0.99924
w*;nompC[3],UAS-NompC::GFP/nompC[3];nompC-GAL4	NOMPC:GFP	-11360.9	0.99923
w*;nompC[3],UAS-NompC::GFP/nompC[3];nompC-GAL4	NOMPC:GFP	-11346.1	0.99922
w*;nompC[3],UAS-NompC::GFP/nompC[3];nompC-GAL4	NOMPC:GFP	-11331.2	0.99922
w*;nompC[3],UAS-NompC::GFP/nompC[3];nompC-GAL4	NOMPC:GFP	-11316.4	0.99921
w*;nompC[3],UAS-NompC::GFP/nompC[3];nompC-GAL4	NOMPC:GFP	-11301.5	0.9992
w*;nompC[3],UAS-NompC::GFP/nompC[3];nompC-GAL4	NOMPC:GFP	-11286.7	0.99919
w*;nompC[3],UAS-NompC::GFP/nompC[3];nompC-GAL4	NOMPC:GFP	-11271.8	0.99919
w*;nompC[3],UAS-NompC::GFP/nompC[3];nompC-GAL4	NOMPC:GFP	-11257	0.99918
w*;nompC[3],UAS-NompC::GFP/nompC[3];nompC-GAL4	NOMPC:GFP	-11242.1	0.99917
w*;nompC[3],UAS-NompC::GFP/nompC[3];nompC-GAL4	NOMPC:GFP	-11227.3	0.99916
w*;nompC[3],UAS-NompC::GFP/nompC[3];nompC-GAL4	NOMPC:GFP	-11212.4	0.99915
w*;nompC[3],UAS-NompC::GFP/nompC[3];nompC-GAL4	NOMPC:GFP	-11197.6	0.99915
w*;nompC[3],UAS-NompC::GFP/nompC[3];nompC-GAL4	NOMPC:GFP	-11182.7	0.99914
w*;nompC[3],UAS-NompC::GFP/nompC[3];nompC-GAL4	NOMPC:GFP	-11167.9	0.99913
w*;nompC[3],UAS-NompC::GFP/nompC[3];nompC-GAL4	NOMPC:GFP	-11153	0.99912
w*;nompC[3],UAS-NompC::GFP/nompC[3];nompC-GAL4	NOMPC:GFP	-11138.2	0.99911
w*;nompC[3],UAS-NompC::GFP/nompC[3];nompC-GAL4	NOMPC:GFP	-11123.3	0.9991
w*;nompC[3],UAS-NompC::GFP/nompC[3];nompC-GAL4	NOMPC:GFP	-11108.5	0.9991
w*;nompC[3],UAS-NompC::GFP/nompC[3];nompC-GAL4	NOMPC:GFP	-11093.6	0.99909
w*;nompC[3],UAS-NompC::GFP/nompC[3];nompC-GAL4	NOMPC:GFP	-11078.8	0.99908
w*;nompC[3],UAS-NompC::GFP/nompC[3];nompC-GAL4	NOMPC:GFP	-11063.9	0.99907
w*;nompC[3],UAS-NompC::GFP/nompC[3];nompC-GAL4	NOMPC:GFP	-11049.1	0.99906
w*;nompC[3],UAS-NompC::GFP/nompC[3];nompC-GAL4	NOMPC:GFP	-11034.2	0.99905
w*;nompC[3],UAS-NompC::GFP/nompC[3];nompC-GAL4	NOMPC:GFP	-11019.4	0.99904
w*;nompC[3],UAS-NompC::GFP/nompC[3];nompC-GAL4	NOMPC:GFP	-11004.5	0.99903
w*;nompC[3],UAS-NompC::GFP/nompC[3];nompC-GAL4	NOMPC:GFP	-10989.7	0.99903
w*;nompC[3],UAS-NompC::GFP/nompC[3];nompC-GAL4	NOMPC:GFP	-10974.8	0.99902
w*;nompC[3],UAS-NompC::GFP/nompC[3];nompC-GAL4	NOMPC:GFP	-10960	0.99901
w*;nompC[3],UAS-NompC::GFP/nompC[3];nompC-GAL4	NOMPC:GFP	-10945.1	0.999
w*;nompC[3],UAS-NompC::GFP/nompC[3];nompC-GAL4	NOMPC:GFP	-10930.3	0.99899
w*;nompC[3],UAS-NompC::GFP/nompC[3];nompC-GAL4	NOMPC:GFP	-10915.4	0.99898
w*;nompC[3],UAS-NompC::GFP/nompC[3];nompC-GAL4	NOMPC:GFP	-10900.6	0.99897
w*;nompC[3],UAS-NompC::GFP/nompC[3];nompC-GAL4	NOMPC:GFP	-10885.7	0.99896
w*;nompC[3],UAS-NompC::GFP/nompC[3];nompC-GAL4	NOMPC:GFP	-10870.9	0.99895
w*;nompC[3],UAS-NompC::GFP/nompC[3];nompC-GAL4	NOMPC:GFP	-10856	0.99894
w*;nompC[3],UAS-NompC::GFP/nompC[3];nompC-GAL4	NOMPC:GFP	-10841.2	0.99893
w*;nompC[3],UAS-NompC::GFP/nompC[3];nompC-GAL4	NOMPC:GFP	-10826.3	0.99892
w*;nompC[3],UAS-NompC::GFP/nompC[3];nompC-GAL4	NOMPC:GFP	-10811.5	0.99891
w*;nompC[3],UAS-NompC::GFP/nompC[3];nompC-GAL4	NOMPC:GFP	-10796.6	0.9989
w*;nompC[3],UAS-NompC::GFP/nompC[3];nompC-GAL4	NOMPC:GFP	-10781.8	0.99889
w*;nompC[3],UAS-NompC::GFP/nompC[3];nompC-GAL4	NOMPC:GFP	-10766.9	0.99888
w*;nompC[3],UAS-NompC::GFP/nompC[3];nompC-GAL4	NOMPC:GFP	-10752	0.99887
w*;nompC[3],UAS-NompC::GFP/nompC[3];nompC-GAL4	NOMPC:GFP	-10737.2	0.99886
w*;nompC[3],UAS-NompC::GFP/nompC[3];nompC-GAL4	NOMPC:GFP	-10722.3	0.99885
w*;nompC[3],UAS-NompC::GFP/nompC[3];nompC-GAL4	NOMPC:GFP	-10707.5	0.99883
w*;nompC[3],UAS-NompC::GFP/nompC[3];nompC-GAL4	NOMPC:GFP	-10692.6	0.99882
w*;nompC[3],UAS-NompC::GFP/nompC[3];nompC-GAL4	NOMPC:GFP	-10677.8	0.99881
w*;nompC[3],UAS-NompC::GFP/nompC[3];nompC-GAL4	NOMPC:GFP	-10662.9	0.9988
w*;nompC[3],UAS-NompC::GFP/nompC[3];nompC-GAL4	NOMPC:GFP	-10648.1	0.99879
w*;nompC[3],UAS-NompC::GFP/nompC[3];nompC-GAL4	NOMPC:GFP	-10633.2	0.99878
w*;nompC[3],UAS-NompC::GFP/nompC[3];nompC-GAL4	NOMPC:GFP	-10618.4	0.99877
w*;nompC[3],UAS-NompC::GFP/nompC[3];nompC-GAL4	NOMPC:GFP	-10603.5	0.99876
w*;nompC[3],UAS-NompC::GFP/nompC[3];nompC-GAL4	NOMPC:GFP	-10588.7	0.99874
w*;nompC[3],UAS-NompC::GFP/nompC[3];nompC-GAL4	NOMPC:GFP	-10573.8	0.99873
w*;nompC[3],UAS-NompC::GFP/nompC[3];nompC-GAL4	NOMPC:GFP	-10559	0.99872
w*;nompC[3],UAS-NompC::GFP/nompC[3];nompC-GAL4	NOMPC:GFP	-10544.1	0.99871
w*;nompC[3],UAS-NompC::GFP/nompC[3];nompC-GAL4	NOMPC:GFP	-10529.3	0.9987
w*;nompC[3],UAS-NompC::GFP/nompC[3];nompC-GAL4	NOMPC:GFP	-10514.4	0.99868
w*;nompC[3],UAS-NompC::GFP/nompC[3];nompC-GAL4	NOMPC:GFP	-10499.6	0.99867
w*;nompC[3],UAS-NompC::GFP/nompC[3];nompC-GAL4	NOMPC:GFP	-10484.7	0.99866
w*;nompC[3],UAS-NompC::GFP/nompC[3];nompC-GAL4	NOMPC:GFP	-10469.9	0.99865
w*;nompC[3],UAS-NompC::GFP/nompC[3];nompC-GAL4	NOMPC:GFP	-10455	0.99863
w*;nompC[3],UAS-NompC::GFP/nompC[3];nompC-GAL4	NOMPC:GFP	-10440.2	0.99862
w*;nompC[3],UAS-NompC::GFP/nompC[3];nompC-GAL4	NOMPC:GFP	-10425.3	0.99861
w*;nompC[3],UAS-NompC::GFP/nompC[3];nompC-GAL4	NOMPC:GFP	-10410.5	0.99859
w*;nompC[3],UAS-NompC::GFP/nompC[3];nompC-GAL4	NOMPC:GFP	-10395.6	0.99858
w*;nompC[3],UAS-NompC::GFP/nompC[3];nompC-GAL4	NOMPC:GFP	-10380.8	0.99857
w*;nompC[3],UAS-NompC::GFP/nompC[3];nompC-GAL4	NOMPC:GFP	-10365.9	0.99855
w*;nompC[3],UAS-NompC::GFP/nompC[3];nompC-GAL4	NOMPC:GFP	-10351.1	0.99854
w*;nompC[3],UAS-NompC::GFP/nompC[3];nompC-GAL4	NOMPC:GFP	-10336.2	0.99853
w*;nompC[3],UAS-NompC::GFP/nompC[3];nompC-GAL4	NOMPC:GFP	-10321.4	0.99851
w*;nompC[3],UAS-NompC::GFP/nompC[3];nompC-GAL4	NOMPC:GFP	-10306.5	0.9985
w*;nompC[3],UAS-NompC::GFP/nompC[3];nompC-GAL4	NOMPC:GFP	-10291.7	0.99848
w*;nompC[3],UAS-NompC::GFP/nompC[3];nompC-GAL4	NOMPC:GFP	-10276.8	0.99847
w*;nompC[3],UAS-NompC::GFP/nompC[3];nompC-GAL4	NOMPC:GFP	-10262	0.99845
w*;nompC[3],UAS-NompC::GFP/nompC[3];nompC-GAL4	NOMPC:GFP	-10247.1	0.99844
w*;nompC[3],UAS-NompC::GFP/nompC[3];nompC-GAL4	NOMPC:GFP	-10232.3	0.99843
w*;nompC[3],UAS-NompC::GFP/nompC[3];nompC-GAL4	NOMPC:GFP	-10217.4	0.99841
w*;nompC[3],UAS-NompC::GFP/nompC[3];nompC-GAL4	NOMPC:GFP	-10202.6	0.9984
w*;nompC[3],UAS-NompC::GFP/nompC[3];nompC-GAL4	NOMPC:GFP	-10187.7	0.99838
w*;nompC[3],UAS-NompC::GFP/nompC[3];nompC-GAL4	NOMPC:GFP	-10172.9	0.99837
w*;nompC[3],UAS-NompC::GFP/nompC[3];nompC-GAL4	NOMPC:GFP	-10158	0.99835
w*;nompC[3],UAS-NompC::GFP/nompC[3];nompC-GAL4	NOMPC:GFP	-10143.2	0.99833
w*;nompC[3],UAS-NompC::GFP/nompC[3];nompC-GAL4	NOMPC:GFP	-10142.1	0.99833
w*;nompC[3],UAS-NompC::GFP/nompC[3];nompC-GAL4	NOMPC:GFP	-10128.3	0.99832
w*;nompC[3],UAS-NompC::GFP/nompC[3];nompC-GAL4	NOMPC:GFP	-10113.5	0.9983
w*;nompC[3],UAS-NompC::GFP/nompC[3];nompC-GAL4	NOMPC:GFP	-10098.6	0.99829
w*;nompC[3],UAS-NompC::GFP/nompC[3];nompC-GAL4	NOMPC:GFP	-10083.8	0.99827
w*;nompC[3],UAS-NompC::GFP/nompC[3];nompC-GAL4	NOMPC:GFP	-10068.9	0.99825
w*;nompC[3],UAS-NompC::GFP/nompC[3];nompC-GAL4	NOMPC:GFP	-10054.1	0.99824
w*;nompC[3],UAS-NompC::GFP/nompC[3];nompC-GAL4	NOMPC:GFP	-10039.2	0.99822
w*;nompC[3],UAS-NompC::GFP/nompC[3];nompC-GAL4	NOMPC:GFP	-10024.4	0.9982
w*;nompC[3],UAS-NompC::GFP/nompC[3];nompC-GAL4	NOMPC:GFP	-10009.5	0.99819
w*;nompC[3],UAS-NompC::GFP/nompC[3];nompC-GAL4	NOMPC:GFP	-9994.65	0.99817
w*;nompC[3],UAS-NompC::GFP/nompC[3];nompC-GAL4	NOMPC:GFP	-9979.8	0.99815
w*;nompC[3],UAS-NompC::GFP/nompC[3];nompC-GAL4	NOMPC:GFP	-9964.95	0.99814
w*;nompC[3],UAS-NompC::GFP/nompC[3];nompC-GAL4	NOMPC:GFP	-9950.1	0.99812
w*;nompC[3],UAS-NompC::GFP/nompC[3];nompC-GAL4	NOMPC:GFP	-9935.25	0.9981
w*;nompC[3],UAS-NompC::GFP/nompC[3];nompC-GAL4	NOMPC:GFP	-9920.4	0.99808
w*;nompC[3],UAS-NompC::GFP/nompC[3];nompC-GAL4	NOMPC:GFP	-9905.55	0.99806
w*;nompC[3],UAS-NompC::GFP/nompC[3];nompC-GAL4	NOMPC:GFP	-9890.7	0.99805
w*;nompC[3],UAS-NompC::GFP/nompC[3];nompC-GAL4	NOMPC:GFP	-9875.85	0.99803
w*;nompC[3],UAS-NompC::GFP/nompC[3];nompC-GAL4	NOMPC:GFP	-9861	0.99801
w*;nompC[3],UAS-NompC::GFP/nompC[3];nompC-GAL4	NOMPC:GFP	-9846.14	0.99799
w*;nompC[3],UAS-NompC::GFP/nompC[3];nompC-GAL4	NOMPC:GFP	-9831.29	0.99797
w*;nompC[3],UAS-NompC::GFP/nompC[3];nompC-GAL4	NOMPC:GFP	-9816.44	0.99795
w*;nompC[3],UAS-NompC::GFP/nompC[3];nompC-GAL4	NOMPC:GFP	-9801.59	0.99793
w*;nompC[3],UAS-NompC::GFP/nompC[3];nompC-GAL4	NOMPC:GFP	-9786.74	0.99791
w*;nompC[3],UAS-NompC::GFP/nompC[3];nompC-GAL4	NOMPC:GFP	-9771.89	0.99789
w*;nompC[3],UAS-NompC::GFP/nompC[3];nompC-GAL4	NOMPC:GFP	-9757.04	0.99787
w*;nompC[3],UAS-NompC::GFP/nompC[3];nompC-GAL4	NOMPC:GFP	-9742.19	0.99785
w*;nompC[3],UAS-NompC::GFP/nompC[3];nompC-GAL4	NOMPC:GFP	-9727.34	0.99783
w*;nompC[3],UAS-NompC::GFP/nompC[3];nompC-GAL4	NOMPC:GFP	-9712.49	0.99781
w*;nompC[3],UAS-NompC::GFP/nompC[3];nompC-GAL4	NOMPC:GFP	-9697.98	0.99779
w*;nompC[3],UAS-NompC::GFP/nompC[3];nompC-GAL4	NOMPC:GFP	-9697.64	0.99779
w*;nompC[3],UAS-NompC::GFP/nompC[3];nompC-GAL4	NOMPC:GFP	-9682.78	0.99777
w*;nompC[3],UAS-NompC::GFP/nompC[3];nompC-GAL4	NOMPC:GFP	-9667.93	0.99775
w*;nompC[3],UAS-NompC::GFP/nompC[3];nompC-GAL4	NOMPC:GFP	-9653.08	0.99773
w*;nompC[3],UAS-NompC::GFP/nompC[3];nompC-GAL4	NOMPC:GFP	-9638.23	0.99771
w*;nompC[3],UAS-NompC::GFP/nompC[3];nompC-GAL4	NOMPC:GFP	-9623.38	0.99768
w*;nompC[3],UAS-NompC::GFP/nompC[3];nompC-GAL4	NOMPC:GFP	-9608.53	0.99766
w*;nompC[3],UAS-NompC::GFP/nompC[3];nompC-GAL4	NOMPC:GFP	-9593.68	0.99764
w*;nompC[3],UAS-NompC::GFP/nompC[3];nompC-GAL4	NOMPC:GFP	-9579.64	0.99762
w*;nompC[3],UAS-NompC::GFP/nompC[3];nompC-GAL4	NOMPC:GFP	-9578.83	0.99762
w*;nompC[3],UAS-NompC::GFP/nompC[3];nompC-GAL4	NOMPC:GFP	-9563.98	0.9976
w*;nompC[3],UAS-NompC::GFP/nompC[3];nompC-GAL4	NOMPC:GFP	-9549.13	0.99757
w*;nompC[3],UAS-NompC::GFP/nompC[3];nompC-GAL4	NOMPC:GFP	-9545.5	0.99757
w*;nompC[3],UAS-NompC::GFP/nompC[3];nompC-GAL4	NOMPC:GFP	-9534.28	0.99755
w*;nompC[3],UAS-NompC::GFP/nompC[3];nompC-GAL4	NOMPC:GFP	-9519.43	0.99753
w*;nompC[3],UAS-NompC::GFP/nompC[3];nompC-GAL4	NOMPC:GFP	-9504.57	0.9975
w*;nompC[3],UAS-NompC::GFP/nompC[3];nompC-GAL4	NOMPC:GFP	-9489.72	0.99748
w*;nompC[3],UAS-NompC::GFP/nompC[3];nompC-GAL4	NOMPC:GFP	-9474.87	0.99746
w*;nompC[3],UAS-NompC::GFP/nompC[3];nompC-GAL4	NOMPC:GFP	-9460.02	0.99743
w*;nompC[3],UAS-NompC::GFP/nompC[3];nompC-GAL4	NOMPC:GFP	-9445.17	0.99741
w*;nompC[3],UAS-NompC::GFP/nompC[3];nompC-GAL4	NOMPC:GFP	-9430.32	0.99738
w*;nompC[3],UAS-NompC::GFP/nompC[3];nompC-GAL4	NOMPC:GFP	-9415.47	0.99736
w*;nompC[3],UAS-NompC::GFP/nompC[3];nompC-GAL4	NOMPC:GFP	-9400.62	0.99733
w*;nompC[3],UAS-NompC::GFP/nompC[3];nompC-GAL4	NOMPC:GFP	-9385.77	0.99731
w*;nompC[3],UAS-NompC::GFP/nompC[3];nompC-GAL4	NOMPC:GFP	-9370.92	0.99728
w*;nompC[3],UAS-NompC::GFP/nompC[3];nompC-GAL4	NOMPC:GFP	-9356.07	0.99726
w*;nompC[3],UAS-NompC::GFP/nompC[3];nompC-GAL4	NOMPC:GFP	-9341.21	0.99723
w*;nompC[3],UAS-NompC::GFP/nompC[3];nompC-GAL4	NOMPC:GFP	-9326.36	0.99721
w*;nompC[3],UAS-NompC::GFP/nompC[3];nompC-GAL4	NOMPC:GFP	-9311.51	0.99718
w*;nompC[3],UAS-NompC::GFP/nompC[3];nompC-GAL4	NOMPC:GFP	-9296.66	0.99715
w*;nompC[3],UAS-NompC::GFP/nompC[3];nompC-GAL4	NOMPC:GFP	-9281.81	0.99713
w*;nompC[3],UAS-NompC::GFP/nompC[3];nompC-GAL4	NOMPC:GFP	-9266.96	0.9971
w*;nompC[3],UAS-NompC::GFP/nompC[3];nompC-GAL4	NOMPC:GFP	-9252.11	0.99707
w*;nompC[3],UAS-NompC::GFP/nompC[3];nompC-GAL4	NOMPC:GFP	-9237.26	0.99704
w*;nompC[3],UAS-NompC::GFP/nompC[3];nompC-GAL4	NOMPC:GFP	-9222.41	0.99701
w*;nompC[3],UAS-NompC::GFP/nompC[3];nompC-GAL4	NOMPC:GFP	-9207.56	0.99699
w*;nompC[3],UAS-NompC::GFP/nompC[3];nompC-GAL4	NOMPC:GFP	-9192.71	0.99696
w*;nompC[3],UAS-NompC::GFP/nompC[3];nompC-GAL4	NOMPC:GFP	-9177.85	0.99693
w*;nompC[3],UAS-NompC::GFP/nompC[3];nompC-GAL4	NOMPC:GFP	-9163	0.9969
w*;nompC[3],UAS-NompC::GFP/nompC[3];nompC-GAL4	NOMPC:GFP	-9148.15	0.99687
w*;nompC[3],UAS-NompC::GFP/nompC[3];nompC-GAL4	NOMPC:GFP	-9133.3	0.99684
w*;nompC[3],UAS-NompC::GFP/nompC[3];nompC-GAL4	NOMPC:GFP	-9118.45	0.99681
w*;nompC[3],UAS-NompC::GFP/nompC[3];nompC-GAL4	NOMPC:GFP	-9103.6	0.99678
w*;nompC[3],UAS-NompC::GFP/nompC[3];nompC-GAL4	NOMPC:GFP	-9088.75	0.99675
w*;nompC[3],UAS-NompC::GFP/nompC[3];nompC-GAL4	NOMPC:GFP	-9073.9	0.99672
w*;nompC[3],UAS-NompC::GFP/nompC[3];nompC-GAL4	NOMPC:GFP	-9059.05	0.99669
w*;nompC[3],UAS-NompC::GFP/nompC[3];nompC-GAL4	NOMPC:GFP	-9044.2	0.99666
w*;nompC[3],UAS-NompC::GFP/nompC[3];nompC-GAL4	NOMPC:GFP	-9029.35	0.99663
w*;nompC[3],UAS-NompC::GFP/nompC[3];nompC-GAL4	NOMPC:GFP	-9014.49	0.99659
w*;nompC[3],UAS-NompC::GFP/nompC[3];nompC-GAL4	NOMPC:GFP	-8999.64	0.99656
w*;nompC[3],UAS-NompC::GFP/nompC[3];nompC-GAL4	NOMPC:GFP	-8984.79	0.99653
w*;nompC[3],UAS-NompC::GFP/nompC[3];nompC-GAL4	NOMPC:GFP	-8977	0.99651
w*;nompC[3],UAS-NompC::GFP/nompC[3];nompC-GAL4	NOMPC:GFP	-8969.94	0.9965
w*;nompC[3],UAS-NompC::GFP/nompC[3];nompC-GAL4	NOMPC:GFP	-8955.09	0.99646
w*;nompC[3],UAS-NompC::GFP/nompC[3];nompC-GAL4	NOMPC:GFP	-8940.24	0.99643
w*;nompC[3],UAS-NompC::GFP/nompC[3];nompC-GAL4	NOMPC:GFP	-8925.39	0.9964
w*;nompC[3],UAS-NompC::GFP/nompC[3];nompC-GAL4	NOMPC:GFP	-8910.54	0.99636
w*;nompC[3],UAS-NompC::GFP/nompC[3];nompC-GAL4	NOMPC:GFP	-8895.69	0.99633
w*;nompC[3],UAS-NompC::GFP/nompC[3];nompC-GAL4	NOMPC:GFP	-8880.84	0.99629
w*;nompC[3],UAS-NompC::GFP/nompC[3];nompC-GAL4	NOMPC:GFP	-8865.99	0.99626
w*;nompC[3],UAS-NompC::GFP/nompC[3];nompC-GAL4	NOMPC:GFP	-8851.13	0.99622
w*;nompC[3],UAS-NompC::GFP/nompC[3];nompC-GAL4	NOMPC:GFP	-8836.28	0.99619
w*;nompC[3],UAS-NompC::GFP/nompC[3];nompC-GAL4	NOMPC:GFP	-8821.43	0.99615
w*;nompC[3],UAS-NompC::GFP/nompC[3];nompC-GAL4	NOMPC:GFP	-8806.58	0.99612
w*;nompC[3],UAS-NompC::GFP/nompC[3];nompC-GAL4	NOMPC:GFP	-8791.73	0.99608
w*;nompC[3],UAS-NompC::GFP/nompC[3];nompC-GAL4	NOMPC:GFP	-8776.88	0.99604
w*;nompC[3],UAS-NompC::GFP/nompC[3];nompC-GAL4	NOMPC:GFP	-8762.03	0.996
w*;nompC[3],UAS-NompC::GFP/nompC[3];nompC-GAL4	NOMPC:GFP	-8747.18	0.99597
w*;nompC[3],UAS-NompC::GFP/nompC[3];nompC-GAL4	NOMPC:GFP	-8732.33	0.99593
w*;nompC[3],UAS-NompC::GFP/nompC[3];nompC-GAL4	NOMPC:GFP	-8717.48	0.99589
w*;nompC[3],UAS-NompC::GFP/nompC[3];nompC-GAL4	NOMPC:GFP	-8702.63	0.99585
w*;nompC[3],UAS-NompC::GFP/nompC[3];nompC-GAL4	NOMPC:GFP	-8687.77	0.99581
w*;nompC[3],UAS-NompC::GFP/nompC[3];nompC-GAL4	NOMPC:GFP	-8672.92	0.99577
w*;nompC[3],UAS-NompC::GFP/nompC[3];nompC-GAL4	NOMPC:GFP	-8667.61	0.99576
w*;nompC[3],UAS-NompC::GFP/nompC[3];nompC-GAL4	NOMPC:GFP	-8658.07	0.99573
w*;nompC[3],UAS-NompC::GFP/nompC[3];nompC-GAL4	NOMPC:GFP	-8643.22	0.99569
w*;nompC[3],UAS-NompC::GFP/nompC[3];nompC-GAL4	NOMPC:GFP	-8628.37	0.99565
w*;nompC[3],UAS-NompC::GFP/nompC[3];nompC-GAL4	NOMPC:GFP	-8613.52	0.99561
w*;nompC[3],UAS-NompC::GFP/nompC[3];nompC-GAL4	NOMPC:GFP	-8598.67	0.99557
w*;nompC[3],UAS-NompC::GFP/nompC[3];nompC-GAL4	NOMPC:GFP	-8583.82	0.99553
w*;nompC[3],UAS-NompC::GFP/nompC[3];nompC-GAL4	NOMPC:GFP	-8568.97	0.99548
w*;nompC[3],UAS-NompC::GFP/nompC[3];nompC-GAL4	NOMPC:GFP	-8554.12	0.99544
w*;nompC[3],UAS-NompC::GFP/nompC[3];nompC-GAL4	NOMPC:GFP	-8539.27	0.9954
w*;nompC[3],UAS-NompC::GFP/nompC[3];nompC-GAL4	NOMPC:GFP	-8524.41	0.99535
w*;nompC[3],UAS-NompC::GFP/nompC[3];nompC-GAL4	NOMPC:GFP	-8509.56	0.99531
w*;nompC[3],UAS-NompC::GFP/nompC[3];nompC-GAL4	NOMPC:GFP	-8494.71	0.99527
w*;nompC[3],UAS-NompC::GFP/nompC[3];nompC-GAL4	NOMPC:GFP	-8479.86	0.99522
w*;nompC[3],UAS-NompC::GFP/nompC[3];nompC-GAL4	NOMPC:GFP	-8465.01	0.99518
w*;nompC[3],UAS-NompC::GFP/nompC[3];nompC-GAL4	NOMPC:GFP	-8450.16	0.99513
w*;nompC[3],UAS-NompC::GFP/nompC[3];nompC-GAL4	NOMPC:GFP	-8435.31	0.99509
w*;nompC[3],UAS-NompC::GFP/nompC[3];nompC-GAL4	NOMPC:GFP	-8420.46	0.99504
w*;nompC[3],UAS-NompC::GFP/nompC[3];nompC-GAL4	NOMPC:GFP	-8405.61	0.99499
w*;nompC[3],UAS-NompC::GFP/nompC[3];nompC-GAL4	NOMPC:GFP	-8390.76	0.99494
w*;nompC[3],UAS-NompC::GFP/nompC[3];nompC-GAL4	NOMPC:GFP	-8375.91	0.9949
w*;nompC[3],UAS-NompC::GFP/nompC[3];nompC-GAL4	NOMPC:GFP	-8361.06	0.99485
w*;nompC[3],UAS-NompC::GFP/nompC[3];nompC-GAL4	NOMPC:GFP	-8346.2	0.9948
w*;nompC[3],UAS-NompC::GFP/nompC[3];nompC-GAL4	NOMPC:GFP	-8331.35	0.99475
w*;nompC[3],UAS-NompC::GFP/nompC[3];nompC-GAL4	NOMPC:GFP	-8316.5	0.9947
w*;nompC[3],UAS-NompC::GFP/nompC[3];nompC-GAL4	NOMPC:GFP	-8301.65	0.99465
w*;nompC[3],UAS-NompC::GFP/nompC[3];nompC-GAL4	NOMPC:GFP	-8286.8	0.9946
w*;nompC[3],UAS-NompC::GFP/nompC[3];nompC-GAL4	NOMPC:GFP	-8271.95	0.99455
w*;nompC[3],UAS-NompC::GFP/nompC[3];nompC-GAL4	NOMPC:GFP	-8257.1	0.9945
w*;nompC[3],UAS-NompC::GFP/nompC[3];nompC-GAL4	NOMPC:GFP	-8242.25	0.99445
w*;nompC[3],UAS-NompC::GFP/nompC[3];nompC-GAL4	NOMPC:GFP	-8227.4	0.99439
w*;nompC[3],UAS-NompC::GFP/nompC[3];nompC-GAL4	NOMPC:GFP	-8212.55	0.99434
w*;nompC[3],UAS-NompC::GFP/nompC[3];nompC-GAL4	NOMPC:GFP	-8197.7	0.99429
w*;nompC[3],UAS-NompC::GFP/nompC[3];nompC-GAL4	NOMPC:GFP	-8182.84	0.99423
w*;nompC[3],UAS-NompC::GFP/nompC[3];nompC-GAL4	NOMPC:GFP	-8167.99	0.99418
w*;nompC[3],UAS-NompC::GFP/nompC[3];nompC-GAL4	NOMPC:GFP	-8153.14	0.99412
w*;nompC[3],UAS-NompC::GFP/nompC[3];nompC-GAL4	NOMPC:GFP	-8138.29	0.99407
w*;nompC[3],UAS-NompC::GFP/nompC[3];nompC-GAL4	NOMPC:GFP	-8123.44	0.99401
w*;nompC[3],UAS-NompC::GFP/nompC[3];nompC-GAL4	NOMPC:GFP	-8108.59	0.99395
w*;nompC[3],UAS-NompC::GFP/nompC[3];nompC-GAL4	NOMPC:GFP	-8093.74	0.9939
w*;nompC[3],UAS-NompC::GFP/nompC[3];nompC-GAL4	NOMPC:GFP	-8078.89	0.99384
w*;nompC[3],UAS-NompC::GFP/nompC[3];nompC-GAL4	NOMPC:GFP	-8064.04	0.99378
w*;nompC[3],UAS-NompC::GFP/nompC[3];nompC-GAL4	NOMPC:GFP	-8049.19	0.99372
w*;nompC[3],UAS-NompC::GFP/nompC[3];nompC-GAL4	NOMPC:GFP	-8034.34	0.99366
w*;nompC[3],UAS-NompC::GFP/nompC[3];nompC-GAL4	NOMPC:GFP	-8019.48	0.9936
w*;nompC[3],UAS-NompC::GFP/nompC[3];nompC-GAL4	NOMPC:GFP	-8004.63	0.99354
w*;nompC[3],UAS-NompC::GFP/nompC[3];nompC-GAL4	NOMPC:GFP	-7989.78	0.99348
w*;nompC[3],UAS-NompC::GFP/nompC[3];nompC-GAL4	NOMPC:GFP	-7974.93	0.99342
w*;nompC[3],UAS-NompC::GFP/nompC[3];nompC-GAL4	NOMPC:GFP	-7964.44	0.99338
w*;nompC[3],UAS-NompC::GFP/nompC[3];nompC-GAL4	NOMPC:GFP	-7960.08	0.99336
w*;nompC[3],UAS-NompC::GFP/nompC[3];nompC-GAL4	NOMPC:GFP	-7945.23	0.9933
w*;nompC[3],UAS-NompC::GFP/nompC[3];nompC-GAL4	NOMPC:GFP	-7930.38	0.99323
w*;nompC[3],UAS-NompC::GFP/nompC[3];nompC-GAL4	NOMPC:GFP	-7915.53	0.99317
w*;nompC[3],UAS-NompC::GFP/nompC[3];nompC-GAL4	NOMPC:GFP	-7900.68	0.9931
w*;nompC[3],UAS-NompC::GFP/nompC[3];nompC-GAL4	NOMPC:GFP	-7885.83	0.99304
w*;nompC[3],UAS-NompC::GFP/nompC[3];nompC-GAL4	NOMPC:GFP	-7870.98	0.99297
w*;nompC[3],UAS-NompC::GFP/nompC[3];nompC-GAL4	NOMPC:GFP	-7856.12	0.99291
w*;nompC[3],UAS-NompC::GFP/nompC[3];nompC-GAL4	NOMPC:GFP	-7841.27	0.99284
w*;nompC[3],UAS-NompC::GFP/nompC[3];nompC-GAL4	NOMPC:GFP	-7826.42	0.99277
w*;nompC[3],UAS-NompC::GFP/nompC[3];nompC-GAL4	NOMPC:GFP	-7811.57	0.9927
w*;nompC[3],UAS-NompC::GFP/nompC[3];nompC-GAL4	NOMPC:GFP	-7796.72	0.99263
w*;nompC[3],UAS-NompC::GFP/nompC[3];nompC-GAL4	NOMPC:GFP	-7781.87	0.99256
w*;nompC[3],UAS-NompC::GFP/nompC[3];nompC-GAL4	NOMPC:GFP	-7767.02	0.99249
w*;nompC[3],UAS-NompC::GFP/nompC[3];nompC-GAL4	NOMPC:GFP	-7752.17	0.99242
w*;nompC[3],UAS-NompC::GFP/nompC[3];nompC-GAL4	NOMPC:GFP	-7737.32	0.99235
w*;nompC[3],UAS-NompC::GFP/nompC[3];nompC-GAL4	NOMPC:GFP	-7722.47	0.99228
w*;nompC[3],UAS-NompC::GFP/nompC[3];nompC-GAL4	NOMPC:GFP	-7707.62	0.99221
w*;nompC[3],UAS-NompC::GFP/nompC[3];nompC-GAL4	NOMPC:GFP	-7692.76	0.99213
w*;nompC[3],UAS-NompC::GFP/nompC[3];nompC-GAL4	NOMPC:GFP	-7677.91	0.99206
w*;nompC[3],UAS-NompC::GFP/nompC[3];nompC-GAL4	NOMPC:GFP	-7663.06	0.99198
w*;nompC[3],UAS-NompC::GFP/nompC[3];nompC-GAL4	NOMPC:GFP	-7651.21	0.99192
w*;nompC[3],UAS-NompC::GFP/nompC[3];nompC-GAL4	NOMPC:GFP	-7648.21	0.99191
w*;nompC[3],UAS-NompC::GFP/nompC[3];nompC-GAL4	NOMPC:GFP	-7633.36	0.99183
w*;nompC[3],UAS-NompC::GFP/nompC[3];nompC-GAL4	NOMPC:GFP	-7618.51	0.99175
w*;nompC[3],UAS-NompC::GFP/nompC[3];nompC-GAL4	NOMPC:GFP	-7603.66	0.99168
w*;nompC[3],UAS-NompC::GFP/nompC[3];nompC-GAL4	NOMPC:GFP	-7588.81	0.9916
w*;nompC[3],UAS-NompC::GFP/nompC[3];nompC-GAL4	NOMPC:GFP	-7573.96	0.99152
w*;nompC[3],UAS-NompC::GFP/nompC[3];nompC-GAL4	NOMPC:GFP	-7559.11	0.99144
w*;nompC[3],UAS-NompC::GFP/nompC[3];nompC-GAL4	NOMPC:GFP	-7557.77	0.99143
w*;nompC[3],UAS-NompC::GFP/nompC[3];nompC-GAL4	NOMPC:GFP	-7544.26	0.99136
w*;nompC[3],UAS-NompC::GFP/nompC[3];nompC-GAL4	NOMPC:GFP	-7529.4	0.99128
w*;nompC[3],UAS-NompC::GFP/nompC[3];nompC-GAL4	NOMPC:GFP	-7524.68	0.99125
w*;nompC[3],UAS-NompC::GFP/nompC[3];nompC-GAL4	NOMPC:GFP	-7514.55	0.99119
w*;nompC[3],UAS-NompC::GFP/nompC[3];nompC-GAL4	NOMPC:GFP	-7499.7	0.99111
w*;nompC[3],UAS-NompC::GFP/nompC[3];nompC-GAL4	NOMPC:GFP	-7484.85	0.99103
w*;nompC[3],UAS-NompC::GFP/nompC[3];nompC-GAL4	NOMPC:GFP	-7470	0.99094
w*;nompC[3],UAS-NompC::GFP/nompC[3];nompC-GAL4	NOMPC:GFP	-7455.15	0.99086
w*;nompC[3],UAS-NompC::GFP/nompC[3];nompC-GAL4	NOMPC:GFP	-7440.3	0.99077
w*;nompC[3],UAS-NompC::GFP/nompC[3];nompC-GAL4	NOMPC:GFP	-7425.45	0.99068
w*;nompC[3],UAS-NompC::GFP/nompC[3];nompC-GAL4	NOMPC:GFP	-7410.6	0.99059
w*;nompC[3],UAS-NompC::GFP/nompC[3];nompC-GAL4	NOMPC:GFP	-7395.75	0.9905
w*;nompC[3],UAS-NompC::GFP/nompC[3];nompC-GAL4	NOMPC:GFP	-7380.9	0.99041
w*;nompC[3],UAS-NompC::GFP/nompC[3];nompC-GAL4	NOMPC:GFP	-7366.05	0.99032
w*;nompC[3],UAS-NompC::GFP/nompC[3];nompC-GAL4	NOMPC:GFP	-7351.19	0.99023
w*;nompC[3],UAS-NompC::GFP/nompC[3];nompC-GAL4	NOMPC:GFP	-7336.34	0.99014
w*;nompC[3],UAS-NompC::GFP/nompC[3];nompC-GAL4	NOMPC:GFP	-7321.49	0.99005
w*;nompC[3],UAS-NompC::GFP/nompC[3];nompC-GAL4	NOMPC:GFP	-7306.64	0.98995
w*;nompC[3],UAS-NompC::GFP/nompC[3];nompC-GAL4	NOMPC:GFP	-7291.79	0.98986
w*;nompC[3],UAS-NompC::GFP/nompC[3];nompC-GAL4	NOMPC:GFP	-7276.94	0.98976
w*;nompC[3],UAS-NompC::GFP/nompC[3];nompC-GAL4	NOMPC:GFP	-7262.09	0.98967
w*;nompC[3],UAS-NompC::GFP/nompC[3];nompC-GAL4	NOMPC:GFP	-7247.24	0.98957
w*;nompC[3],UAS-NompC::GFP/nompC[3];nompC-GAL4	NOMPC:GFP	-7232.39	0.98947
w*;nompC[3],UAS-NompC::GFP/nompC[3];nompC-GAL4	NOMPC:GFP	-7217.54	0.98937
w*;nompC[3],UAS-NompC::GFP/nompC[3];nompC-GAL4	NOMPC:GFP	-7202.69	0.98927
w*;nompC[3],UAS-NompC::GFP/nompC[3];nompC-GAL4	NOMPC:GFP	-7187.83	0.98917
w*;nompC[3],UAS-NompC::GFP/nompC[3];nompC-GAL4	NOMPC:GFP	-7172.98	0.98907
w*;nompC[3],UAS-NompC::GFP/nompC[3];nompC-GAL4	NOMPC:GFP	-7158.13	0.98896
w*;nompC[3],UAS-NompC::GFP/nompC[3];nompC-GAL4	NOMPC:GFP	-7143.28	0.98886
w*;nompC[3],UAS-NompC::GFP/nompC[3];nompC-GAL4	NOMPC:GFP	-7128.43	0.98875
w*;nompC[3],UAS-NompC::GFP/nompC[3];nompC-GAL4	NOMPC:GFP	-7113.58	0.98865
w*;nompC[3],UAS-NompC::GFP/nompC[3];nompC-GAL4	NOMPC:GFP	-7098.73	0.98854
w*;nompC[3],UAS-NompC::GFP/nompC[3];nompC-GAL4	NOMPC:GFP	-7083.88	0.98843
w*;nompC[3],UAS-NompC::GFP/nompC[3];nompC-GAL4	NOMPC:GFP	-7069.03	0.98832
w*;nompC[3],UAS-NompC::GFP/nompC[3];nompC-GAL4	NOMPC:GFP	-7054.18	0.98821
w*;nompC[3],UAS-NompC::GFP/nompC[3];nompC-GAL4	NOMPC:GFP	-7039.33	0.9881
w*;nompC[3],UAS-NompC::GFP/nompC[3];nompC-GAL4	NOMPC:GFP	-7024.47	0.98799
w*;nompC[3],UAS-NompC::GFP/nompC[3];nompC-GAL4	NOMPC:GFP	-7014.39	0.98791
w*;nompC[3],UAS-NompC::GFP/nompC[3];nompC-GAL4	NOMPC:GFP	-7009.62	0.98787
w*;nompC[3],UAS-NompC::GFP/nompC[3];nompC-GAL4	NOMPC:GFP	-6994.77	0.98776
w*;nompC[3],UAS-NompC::GFP/nompC[3];nompC-GAL4	NOMPC:GFP	-6979.92	0.98764
w*;nompC[3],UAS-NompC::GFP/nompC[3];nompC-GAL4	NOMPC:GFP	-6965.07	0.98753
w*;nompC[3],UAS-NompC::GFP/nompC[3];nompC-GAL4	NOMPC:GFP	-6950.22	0.98741
w*;nompC[3],UAS-NompC::GFP/nompC[3];nompC-GAL4	NOMPC:GFP	-6935.37	0.98729
w*;nompC[3],UAS-NompC::GFP/nompC[3];nompC-GAL4	NOMPC:GFP	-6920.52	0.98717
w*;nompC[3],UAS-NompC::GFP/nompC[3];nompC-GAL4	NOMPC:GFP	-6905.67	0.98705
w*;nompC[3],UAS-NompC::GFP/nompC[3];nompC-GAL4	NOMPC:GFP	-6890.82	0.98692
w*;nompC[3],UAS-NompC::GFP/nompC[3];nompC-GAL4	NOMPC:GFP	-6875.97	0.9868
w*;nompC[3],UAS-NompC::GFP/nompC[3];nompC-GAL4	NOMPC:GFP	-6861.11	0.98668
w*;nompC[3],UAS-NompC::GFP/nompC[3];nompC-GAL4	NOMPC:GFP	-6846.26	0.98655
w*;nompC[3],UAS-NompC::GFP/nompC[3];nompC-GAL4	NOMPC:GFP	-6831.41	0.98642
w*;nompC[3],UAS-NompC::GFP/nompC[3];nompC-GAL4	NOMPC:GFP	-6816.56	0.9863
w*;nompC[3],UAS-NompC::GFP/nompC[3];nompC-GAL4	NOMPC:GFP	-6813.09	0.98627
w*;nompC[3],UAS-NompC::GFP/nompC[3];nompC-GAL4	NOMPC:GFP	-6801.71	0.98617
w*;nompC[3],UAS-NompC::GFP/nompC[3];nompC-GAL4	NOMPC:GFP	-6786.86	0.98603
w*;nompC[3],UAS-NompC::GFP/nompC[3];nompC-GAL4	NOMPC:GFP	-6772.01	0.9859
w*;nompC[3],UAS-NompC::GFP/nompC[3];nompC-GAL4	NOMPC:GFP	-6757.16	0.98577
w*;nompC[3],UAS-NompC::GFP/nompC[3];nompC-GAL4	NOMPC:GFP	-6742.31	0.98564
w*;nompC[3],UAS-NompC::GFP/nompC[3];nompC-GAL4	NOMPC:GFP	-6727.46	0.9855
w*;nompC[3],UAS-NompC::GFP/nompC[3];nompC-GAL4	NOMPC:GFP	-6712.61	0.98536
w*;nompC[3],UAS-NompC::GFP/nompC[3];nompC-GAL4	NOMPC:GFP	-6697.75	0.98522
w*;nompC[3],UAS-NompC::GFP/nompC[3];nompC-GAL4	NOMPC:GFP	-6682.9	0.98508
w*;nompC[3],UAS-NompC::GFP/nompC[3];nompC-GAL4	NOMPC:GFP	-6668.05	0.98494
w*;nompC[3],UAS-NompC::GFP/nompC[3];nompC-GAL4	NOMPC:GFP	-6653.2	0.9848
w*;nompC[3],UAS-NompC::GFP/nompC[3];nompC-GAL4	NOMPC:GFP	-6638.35	0.98466
w*;nompC[3],UAS-NompC::GFP/nompC[3];nompC-GAL4	NOMPC:GFP	-6623.5	0.98451
w*;nompC[3],UAS-NompC::GFP/nompC[3];nompC-GAL4	NOMPC:GFP	-6608.65	0.98437
w*;nompC[3],UAS-NompC::GFP/nompC[3];nompC-GAL4	NOMPC:GFP	-6593.8	0.98422
w*;nompC[3],UAS-NompC::GFP/nompC[3];nompC-GAL4	NOMPC:GFP	-6578.95	0.98407
w*;nompC[3],UAS-NompC::GFP/nompC[3];nompC-GAL4	NOMPC:GFP	-6564.1	0.98392
w*;nompC[3],UAS-NompC::GFP/nompC[3];nompC-GAL4	NOMPC:GFP	-6549.25	0.98377
w*;nompC[3],UAS-NompC::GFP/nompC[3];nompC-GAL4	NOMPC:GFP	-6534.39	0.98361
w*;nompC[3],UAS-NompC::GFP/nompC[3];nompC-GAL4	NOMPC:GFP	-6519.54	0.98346
w*;nompC[3],UAS-NompC::GFP/nompC[3];nompC-GAL4	NOMPC:GFP	-6504.69	0.9833
w*;nompC[3],UAS-NompC::GFP/nompC[3];nompC-GAL4	NOMPC:GFP	-6489.84	0.98314
w*;nompC[3],UAS-NompC::GFP/nompC[3];nompC-GAL4	NOMPC:GFP	-6474.99	0.98298
w*;nompC[3],UAS-NompC::GFP/nompC[3];nompC-GAL4	NOMPC:GFP	-6460.14	0.98282
w*;nompC[3],UAS-NompC::GFP/nompC[3];nompC-GAL4	NOMPC:GFP	-6445.29	0.98266
w*;nompC[3],UAS-NompC::GFP/nompC[3];nompC-GAL4	NOMPC:GFP	-6430.44	0.9825
w*;nompC[3],UAS-NompC::GFP/nompC[3];nompC-GAL4	NOMPC:GFP	-6415.59	0.98233
w*;nompC[3],UAS-NompC::GFP/nompC[3];nompC-GAL4	NOMPC:GFP	-6400.74	0.98216
w*;nompC[3],UAS-NompC::GFP/nompC[3];nompC-GAL4	NOMPC:GFP	-6385.89	0.982
w*;nompC[3],UAS-NompC::GFP/nompC[3];nompC-GAL4	NOMPC:GFP	-6371.03	0.98183
w*;nompC[3],UAS-NompC::GFP/nompC[3];nompC-GAL4	NOMPC:GFP	-6356.18	0.98165
w*;nompC[3],UAS-NompC::GFP/nompC[3];nompC-GAL4	NOMPC:GFP	-6341.33	0.98148
w*;nompC[3],UAS-NompC::GFP/nompC[3];nompC-GAL4	NOMPC:GFP	-6326.48	0.98131
w*;nompC[3],UAS-NompC::GFP/nompC[3];nompC-GAL4	NOMPC:GFP	-6311.63	0.98113
w*;nompC[3],UAS-NompC::GFP/nompC[3];nompC-GAL4	NOMPC:GFP	-6296.78	0.98095
w*;nompC[3],UAS-NompC::GFP/nompC[3];nompC-GAL4	NOMPC:GFP	-6281.93	0.98077
w*;nompC[3],UAS-NompC::GFP/nompC[3];nompC-GAL4	NOMPC:GFP	-6267.08	0.98059
w*;nompC[3],UAS-NompC::GFP/nompC[3];nompC-GAL4	NOMPC:GFP	-6252.23	0.98041
w*;nompC[3],UAS-NompC::GFP/nompC[3];nompC-GAL4	NOMPC:GFP	-6237.38	0.98022
w*;nompC[3],UAS-NompC::GFP/nompC[3];nompC-GAL4	NOMPC:GFP	-6222.53	0.98003
w*;nompC[3],UAS-NompC::GFP/nompC[3];nompC-GAL4	NOMPC:GFP	-6207.68	0.97984
w*;nompC[3],UAS-NompC::GFP/nompC[3];nompC-GAL4	NOMPC:GFP	-6192.82	0.97965
w*;nompC[3],UAS-NompC::GFP/nompC[3];nompC-GAL4	NOMPC:GFP	-6177.97	0.97946
w*;nompC[3],UAS-NompC::GFP/nompC[3];nompC-GAL4	NOMPC:GFP	-6163.12	0.97927
w*;nompC[3],UAS-NompC::GFP/nompC[3];nompC-GAL4	NOMPC:GFP	-6148.27	0.97907
w*;nompC[3],UAS-NompC::GFP/nompC[3];nompC-GAL4	NOMPC:GFP	-6133.42	0.97887
w*;nompC[3],UAS-NompC::GFP/nompC[3];nompC-GAL4	NOMPC:GFP	-6118.57	0.97867
w*;nompC[3],UAS-NompC::GFP/nompC[3];nompC-GAL4	NOMPC:GFP	-6103.72	0.97847
w*;nompC[3],UAS-NompC::GFP/nompC[3];nompC-GAL4	NOMPC:GFP	-6088.87	0.97827
w*;nompC[3],UAS-NompC::GFP/nompC[3];nompC-GAL4	NOMPC:GFP	-6074.02	0.97806
w*;nompC[3],UAS-NompC::GFP/nompC[3];nompC-GAL4	NOMPC:GFP	-6059.17	0.97786
w*;nompC[3],UAS-NompC::GFP/nompC[3];nompC-GAL4	NOMPC:GFP	-6044.32	0.97765
w*;nompC[3],UAS-NompC::GFP/nompC[3];nompC-GAL4	NOMPC:GFP	-6029.46	0.97744
w*;nompC[3],UAS-NompC::GFP/nompC[3];nompC-GAL4	NOMPC:GFP	-6014.61	0.97722
w*;nompC[3],UAS-NompC::GFP/nompC[3];nompC-GAL4	NOMPC:GFP	-5999.76	0.97701
w*;nompC[3],UAS-NompC::GFP/nompC[3];nompC-GAL4	NOMPC:GFP	-5984.91	0.97679
w*;nompC[3],UAS-NompC::GFP/nompC[3];nompC-GAL4	NOMPC:GFP	-5970.06	0.97657
w*;nompC[3],UAS-NompC::GFP/nompC[3];nompC-GAL4	NOMPC:GFP	-5955.21	0.97635
w*;nompC[3],UAS-NompC::GFP/nompC[3];nompC-GAL4	NOMPC:GFP	-5940.36	0.97613
w*;nompC[3],UAS-NompC::GFP/nompC[3];nompC-GAL4	NOMPC:GFP	-5925.51	0.9759
w*;nompC[3],UAS-NompC::GFP/nompC[3];nompC-GAL4	NOMPC:GFP	-5910.66	0.97567
w*;nompC[3],UAS-NompC::GFP/nompC[3];nompC-GAL4	NOMPC:GFP	-5895.81	0.97544
w*;nompC[3],UAS-NompC::GFP/nompC[3];nompC-GAL4	NOMPC:GFP	-5880.96	0.97521
w*;nompC[3],UAS-NompC::GFP/nompC[3];nompC-GAL4	NOMPC:GFP	-5866.1	0.97498
w*;nompC[3],UAS-NompC::GFP/nompC[3];nompC-GAL4	NOMPC:GFP	-5851.25	0.97474
w*;nompC[3],UAS-NompC::GFP/nompC[3];nompC-GAL4	NOMPC:GFP	-5836.4	0.9745
w*;nompC[3],UAS-NompC::GFP/nompC[3];nompC-GAL4	NOMPC:GFP	-5821.55	0.97426
w*;nompC[3],UAS-NompC::GFP/nompC[3];nompC-GAL4	NOMPC:GFP	-5806.7	0.97402
w*;nompC[3],UAS-NompC::GFP/nompC[3];nompC-GAL4	NOMPC:GFP	-5791.85	0.97377
w*;nompC[3],UAS-NompC::GFP/nompC[3];nompC-GAL4	NOMPC:GFP	-5777	0.97352
w*;nompC[3],UAS-NompC::GFP/nompC[3];nompC-GAL4	NOMPC:GFP	-5762.15	0.97327
w*;nompC[3],UAS-NompC::GFP/nompC[3];nompC-GAL4	NOMPC:GFP	-5747.3	0.97302
w*;nompC[3],UAS-NompC::GFP/nompC[3];nompC-GAL4	NOMPC:GFP	-5732.45	0.97276
w*;nompC[3],UAS-NompC::GFP/nompC[3];nompC-GAL4	NOMPC:GFP	-5717.6	0.97251
w*;nompC[3],UAS-NompC::GFP/nompC[3];nompC-GAL4	NOMPC:GFP	-5702.74	0.97225
w*;nompC[3],UAS-NompC::GFP/nompC[3];nompC-GAL4	NOMPC:GFP	-5687.89	0.97198
w*;nompC[3],UAS-NompC::GFP/nompC[3];nompC-GAL4	NOMPC:GFP	-5673.04	0.97172
w*;nompC[3],UAS-NompC::GFP/nompC[3];nompC-GAL4	NOMPC:GFP	-5658.19	0.97145
w*;nompC[3],UAS-NompC::GFP/nompC[3];nompC-GAL4	NOMPC:GFP	-5643.34	0.97118
w*;nompC[3],UAS-NompC::GFP/nompC[3];nompC-GAL4	NOMPC:GFP	-5628.49	0.97091
w*;nompC[3],UAS-NompC::GFP/nompC[3];nompC-GAL4	NOMPC:GFP	-5613.64	0.97064
w*;nompC[3],UAS-NompC::GFP/nompC[3];nompC-GAL4	NOMPC:GFP	-5598.79	0.97036
w*;nompC[3],UAS-NompC::GFP/nompC[3];nompC-GAL4	NOMPC:GFP	-5583.94	0.97008
w*;nompC[3],UAS-NompC::GFP/nompC[3];nompC-GAL4	NOMPC:GFP	-5569.09	0.96979
w*;nompC[3],UAS-NompC::GFP/nompC[3];nompC-GAL4	NOMPC:GFP	-5554.24	0.96951
w*;nompC[3],UAS-NompC::GFP/nompC[3];nompC-GAL4	NOMPC:GFP	-5539.38	0.96922
w*;nompC[3],UAS-NompC::GFP/nompC[3];nompC-GAL4	NOMPC:GFP	-5524.53	0.96893
w*;nompC[3],UAS-NompC::GFP/nompC[3];nompC-GAL4	NOMPC:GFP	-5509.68	0.96864
w*;nompC[3],UAS-NompC::GFP/nompC[3];nompC-GAL4	NOMPC:GFP	-5494.83	0.96834
w*;nompC[3],UAS-NompC::GFP/nompC[3];nompC-GAL4	NOMPC:GFP	-5479.98	0.96804
w*;nompC[3],UAS-NompC::GFP/nompC[3];nompC-GAL4	NOMPC:GFP	-5465.13	0.96774
w*;nompC[3],UAS-NompC::GFP/nompC[3];nompC-GAL4	NOMPC:GFP	-5450.28	0.96743
w*;nompC[3],UAS-NompC::GFP/nompC[3];nompC-GAL4	NOMPC:GFP	-5435.43	0.96713
w*;nompC[3],UAS-NompC::GFP/nompC[3];nompC-GAL4	NOMPC:GFP	-5420.58	0.96682
w*;nompC[3],UAS-NompC::GFP/nompC[3];nompC-GAL4	NOMPC:GFP	-5405.73	0.9665
w*;nompC[3],UAS-NompC::GFP/nompC[3];nompC-GAL4	NOMPC:GFP	-5390.88	0.96619
w*;nompC[3],UAS-NompC::GFP/nompC[3];nompC-GAL4	NOMPC:GFP	-5376.02	0.96587
w*;nompC[3],UAS-NompC::GFP/nompC[3];nompC-GAL4	NOMPC:GFP	-5361.17	0.96554
w*;nompC[3],UAS-NompC::GFP/nompC[3];nompC-GAL4	NOMPC:GFP	-5346.32	0.96522
w*;nompC[3],UAS-NompC::GFP/nompC[3];nompC-GAL4	NOMPC:GFP	-5331.47	0.96489
w*;nompC[3],UAS-NompC::GFP/nompC[3];nompC-GAL4	NOMPC:GFP	-5316.62	0.96456
w*;nompC[3],UAS-NompC::GFP/nompC[3];nompC-GAL4	NOMPC:GFP	-5301.77	0.96422
w*;nompC[3],UAS-NompC::GFP/nompC[3];nompC-GAL4	NOMPC:GFP	-5286.92	0.96388
w*;nompC[3],UAS-NompC::GFP/nompC[3];nompC-GAL4	NOMPC:GFP	-5272.07	0.96354
w*;nompC[3],UAS-NompC::GFP/nompC[3];nompC-GAL4	NOMPC:GFP	-5257.22	0.9632
w*;nompC[3],UAS-NompC::GFP/nompC[3];nompC-GAL4	NOMPC:GFP	-5242.37	0.96285
w*;nompC[3],UAS-NompC::GFP/nompC[3];nompC-GAL4	NOMPC:GFP	-5227.52	0.9625
w*;nompC[3],UAS-NompC::GFP/nompC[3];nompC-GAL4	NOMPC:GFP	-5212.66	0.96214
w*;nompC[3],UAS-NompC::GFP/nompC[3];nompC-GAL4	NOMPC:GFP	-5197.81	0.96179
w*;nompC[3],UAS-NompC::GFP/nompC[3];nompC-GAL4	NOMPC:GFP	-5182.96	0.96142
w*;nompC[3],UAS-NompC::GFP/nompC[3];nompC-GAL4	NOMPC:GFP	-5168.11	0.96106
w*;nompC[3],UAS-NompC::GFP/nompC[3];nompC-GAL4	NOMPC:GFP	-5153.26	0.96069
w*;nompC[3],UAS-NompC::GFP/nompC[3];nompC-GAL4	NOMPC:GFP	-5138.41	0.96032
w*;nompC[3],UAS-NompC::GFP/nompC[3];nompC-GAL4	NOMPC:GFP	-5123.56	0.95995
w*;nompC[3],UAS-NompC::GFP/nompC[3];nompC-GAL4	NOMPC:GFP	-5108.71	0.95957
w*;nompC[3],UAS-NompC::GFP/nompC[3];nompC-GAL4	NOMPC:GFP	-5093.86	0.95918
w*;nompC[3],UAS-NompC::GFP/nompC[3];nompC-GAL4	NOMPC:GFP	-5079.01	0.9588
w*;nompC[3],UAS-NompC::GFP/nompC[3];nompC-GAL4	NOMPC:GFP	-5064.16	0.95841
w*;nompC[3],UAS-NompC::GFP/nompC[3];nompC-GAL4	NOMPC:GFP	-5049.31	0.95802
w*;nompC[3],UAS-NompC::GFP/nompC[3];nompC-GAL4	NOMPC:GFP	-5034.45	0.95762
w*;nompC[3],UAS-NompC::GFP/nompC[3];nompC-GAL4	NOMPC:GFP	-5019.6	0.95722
w*;nompC[3],UAS-NompC::GFP/nompC[3];nompC-GAL4	NOMPC:GFP	-5004.75	0.95681
w*;nompC[3],UAS-NompC::GFP/nompC[3];nompC-GAL4	NOMPC:GFP	-4989.9	0.95641
w*;nompC[3],UAS-NompC::GFP/nompC[3];nompC-GAL4	NOMPC:GFP	-4975.05	0.95599
w*;nompC[3],UAS-NompC::GFP/nompC[3];nompC-GAL4	NOMPC:GFP	-4960.2	0.95558
w*;nompC[3],UAS-NompC::GFP/nompC[3];nompC-GAL4	NOMPC:GFP	-4945.35	0.95516
w*;nompC[3],UAS-NompC::GFP/nompC[3];nompC-GAL4	NOMPC:GFP	-4930.5	0.95473
w*;nompC[3],UAS-NompC::GFP/nompC[3];nompC-GAL4	NOMPC:GFP	-4915.65	0.95431
w*;nompC[3],UAS-NompC::GFP/nompC[3];nompC-GAL4	NOMPC:GFP	-4900.8	0.95387
w*;nompC[3],UAS-NompC::GFP/nompC[3];nompC-GAL4	NOMPC:GFP	-4885.95	0.95344
w*;nompC[3],UAS-NompC::GFP/nompC[3];nompC-GAL4	NOMPC:GFP	-4871.09	0.953
w*;nompC[3],UAS-NompC::GFP/nompC[3];nompC-GAL4	NOMPC:GFP	-4856.24	0.95255
w*;nompC[3],UAS-NompC::GFP/nompC[3];nompC-GAL4	NOMPC:GFP	-4841.39	0.95211
w*;nompC[3],UAS-NompC::GFP/nompC[3];nompC-GAL4	NOMPC:GFP	-4826.54	0.95165
w*;nompC[3],UAS-NompC::GFP/nompC[3];nompC-GAL4	NOMPC:GFP	-4811.69	0.9512
w*;nompC[3],UAS-NompC::GFP/nompC[3];nompC-GAL4	NOMPC:GFP	-4796.84	0.95073
w*;nompC[3],UAS-NompC::GFP/nompC[3];nompC-GAL4	NOMPC:GFP	-4781.99	0.95027
w*;nompC[3],UAS-NompC::GFP/nompC[3];nompC-GAL4	NOMPC:GFP	-4767.14	0.9498
w*;nompC[3],UAS-NompC::GFP/nompC[3];nompC-GAL4	NOMPC:GFP	-4752.29	0.94932
w*;nompC[3],UAS-NompC::GFP/nompC[3];nompC-GAL4	NOMPC:GFP	-4737.44	0.94885
w*;nompC[3],UAS-NompC::GFP/nompC[3];nompC-GAL4	NOMPC:GFP	-4722.59	0.94836
w*;nompC[3],UAS-NompC::GFP/nompC[3];nompC-GAL4	NOMPC:GFP	-4707.73	0.94787
w*;nompC[3],UAS-NompC::GFP/nompC[3];nompC-GAL4	NOMPC:GFP	-4692.88	0.94738
w*;nompC[3],UAS-NompC::GFP/nompC[3];nompC-GAL4	NOMPC:GFP	-4678.03	0.94688
w*;nompC[3],UAS-NompC::GFP/nompC[3];nompC-GAL4	NOMPC:GFP	-4663.18	0.94638
w*;nompC[3],UAS-NompC::GFP/nompC[3];nompC-GAL4	NOMPC:GFP	-4648.33	0.94588
w*;nompC[3],UAS-NompC::GFP/nompC[3];nompC-GAL4	NOMPC:GFP	-4633.48	0.94536
w*;nompC[3],UAS-NompC::GFP/nompC[3];nompC-GAL4	NOMPC:GFP	-4618.63	0.94485
w*;nompC[3],UAS-NompC::GFP/nompC[3];nompC-GAL4	NOMPC:GFP	-4603.78	0.94433
w*;nompC[3],UAS-NompC::GFP/nompC[3];nompC-GAL4	NOMPC:GFP	-4588.93	0.9438
w*;nompC[3],UAS-NompC::GFP/nompC[3];nompC-GAL4	NOMPC:GFP	-4574.08	0.94327
w*;nompC[3],UAS-NompC::GFP/nompC[3];nompC-GAL4	NOMPC:GFP	-4559.23	0.94273
w*;nompC[3],UAS-NompC::GFP/nompC[3];nompC-GAL4	NOMPC:GFP	-4544.37	0.94219
w*;nompC[3],UAS-NompC::GFP/nompC[3];nompC-GAL4	NOMPC:GFP	-4529.52	0.94164
w*;nompC[3],UAS-NompC::GFP/nompC[3];nompC-GAL4	NOMPC:GFP	-4523.37	0.94142
w*;nompC[3],UAS-NompC::GFP/nompC[3];nompC-GAL4	NOMPC:GFP	-4514.67	0.94109
w*;nompC[3],UAS-NompC::GFP/nompC[3];nompC-GAL4	NOMPC:GFP	-4499.82	0.94054
w*;nompC[3],UAS-NompC::GFP/nompC[3];nompC-GAL4	NOMPC:GFP	-4484.97	0.93997
w*;nompC[3],UAS-NompC::GFP/nompC[3];nompC-GAL4	NOMPC:GFP	-4470.12	0.93941
w*;nompC[3],UAS-NompC::GFP/nompC[3];nompC-GAL4	NOMPC:GFP	-4455.27	0.93883
w*;nompC[3],UAS-NompC::GFP/nompC[3];nompC-GAL4	NOMPC:GFP	-4440.42	0.93826
w*;nompC[3],UAS-NompC::GFP/nompC[3];nompC-GAL4	NOMPC:GFP	-4433.42	0.93798
w*;nompC[3],UAS-NompC::GFP/nompC[3];nompC-GAL4	NOMPC:GFP	-4425.57	0.93767
w*;nompC[3],UAS-NompC::GFP/nompC[3];nompC-GAL4	NOMPC:GFP	-4410.72	0.93708
w*;nompC[3],UAS-NompC::GFP/nompC[3];nompC-GAL4	NOMPC:GFP	-4395.87	0.93649
w*;nompC[3],UAS-NompC::GFP/nompC[3];nompC-GAL4	NOMPC:GFP	-4381.01	0.93589
w*;nompC[3],UAS-NompC::GFP/nompC[3];nompC-GAL4	NOMPC:GFP	-4366.16	0.93528
w*;nompC[3],UAS-NompC::GFP/nompC[3];nompC-GAL4	NOMPC:GFP	-4356.57	0.93489
w*;nompC[3],UAS-NompC::GFP/nompC[3];nompC-GAL4	NOMPC:GFP	-4351.31	0.93467
w*;nompC[3],UAS-NompC::GFP/nompC[3];nompC-GAL4	NOMPC:GFP	-4336.46	0.93405
w*;nompC[3],UAS-NompC::GFP/nompC[3];nompC-GAL4	NOMPC:GFP	-4321.61	0.93343
w*;nompC[3],UAS-NompC::GFP/nompC[3];nompC-GAL4	NOMPC:GFP	-4306.76	0.9328
w*;nompC[3],UAS-NompC::GFP/nompC[3];nompC-GAL4	NOMPC:GFP	-4291.91	0.93217
w*;nompC[3],UAS-NompC::GFP/nompC[3];nompC-GAL4	NOMPC:GFP	-4277.06	0.93152
w*;nompC[3],UAS-NompC::GFP/nompC[3];nompC-GAL4	NOMPC:GFP	-4269.51	0.9312
w*;nompC[3],UAS-NompC::GFP/nompC[3];nompC-GAL4	NOMPC:GFP	-4262.21	0.93088
w*;nompC[3],UAS-NompC::GFP/nompC[3];nompC-GAL4	NOMPC:GFP	-4247.36	0.93022
w*;nompC[3],UAS-NompC::GFP/nompC[3];nompC-GAL4	NOMPC:GFP	-4232.51	0.92956
w*;nompC[3],UAS-NompC::GFP/nompC[3];nompC-GAL4	NOMPC:GFP	-4217.65	0.9289
w*;nompC[3],UAS-NompC::GFP/nompC[3];nompC-GAL4	NOMPC:GFP	-4202.8	0.92823
w*;nompC[3],UAS-NompC::GFP/nompC[3];nompC-GAL4	NOMPC:GFP	-4187.95	0.92755
w*;nompC[3],UAS-NompC::GFP/nompC[3];nompC-GAL4	NOMPC:GFP	-4173.1	0.92686
w*;nompC[3],UAS-NompC::GFP/nompC[3];nompC-GAL4	NOMPC:GFP	-4158.25	0.92617
w*;nompC[3],UAS-NompC::GFP/nompC[3];nompC-GAL4	NOMPC:GFP	-4143.4	0.92547
w*;nompC[3],UAS-NompC::GFP/nompC[3];nompC-GAL4	NOMPC:GFP	-4128.55	0.92477
w*;nompC[3],UAS-NompC::GFP/nompC[3];nompC-GAL4	NOMPC:GFP	-4113.7	0.92406
w*;nompC[3],UAS-NompC::GFP/nompC[3];nompC-GAL4	NOMPC:GFP	-4098.85	0.92334
w*;nompC[3],UAS-NompC::GFP/nompC[3];nompC-GAL4	NOMPC:GFP	-4084	0.92262
w*;nompC[3],UAS-NompC::GFP/nompC[3];nompC-GAL4	NOMPC:GFP	-4069.15	0.92188
w*;nompC[3],UAS-NompC::GFP/nompC[3];nompC-GAL4	NOMPC:GFP	-4054.29	0.92115
w*;nompC[3],UAS-NompC::GFP/nompC[3];nompC-GAL4	NOMPC:GFP	-4039.44	0.9204
w*;nompC[3],UAS-NompC::GFP/nompC[3];nompC-GAL4	NOMPC:GFP	-4024.59	0.91965
w*;nompC[3],UAS-NompC::GFP/nompC[3];nompC-GAL4	NOMPC:GFP	-4009.74	0.91889
w*;nompC[3],UAS-NompC::GFP/nompC[3];nompC-GAL4	NOMPC:GFP	-3994.89	0.91812
w*;nompC[3],UAS-NompC::GFP/nompC[3];nompC-GAL4	NOMPC:GFP	-3980.04	0.91735
w*;nompC[3],UAS-NompC::GFP/nompC[3];nompC-GAL4	NOMPC:GFP	-3965.19	0.91657
w*;nompC[3],UAS-NompC::GFP/nompC[3];nompC-GAL4	NOMPC:GFP	-3950.34	0.91578
w*;nompC[3],UAS-NompC::GFP/nompC[3];nompC-GAL4	NOMPC:GFP	-3935.49	0.91498
w*;nompC[3],UAS-NompC::GFP/nompC[3];nompC-GAL4	NOMPC:GFP	-3928.9	0.91463
w*;nompC[3],UAS-NompC::GFP/nompC[3];nompC-GAL4	NOMPC:GFP	-3920.64	0.91418
w*;nompC[3],UAS-NompC::GFP/nompC[3];nompC-GAL4	NOMPC:GFP	-3907.68	0.91347
w*;nompC[3],UAS-NompC::GFP/nompC[3];nompC-GAL4	NOMPC:GFP	-3905.79	0.91337
w*;nompC[3],UAS-NompC::GFP/nompC[3];nompC-GAL4	NOMPC:GFP	-3890.94	0.91255
w*;nompC[3],UAS-NompC::GFP/nompC[3];nompC-GAL4	NOMPC:GFP	-3876.08	0.91172
w*;nompC[3],UAS-NompC::GFP/nompC[3];nompC-GAL4	NOMPC:GFP	-3861.23	0.91089
w*;nompC[3],UAS-NompC::GFP/nompC[3];nompC-GAL4	NOMPC:GFP	-3846.38	0.91005
w*;nompC[3],UAS-NompC::GFP/nompC[3];nompC-GAL4	NOMPC:GFP	-3831.53	0.9092
w*;nompC[3],UAS-NompC::GFP/nompC[3];nompC-GAL4	NOMPC:GFP	-3816.68	0.90834
w*;nompC[3],UAS-NompC::GFP/nompC[3];nompC-GAL4	NOMPC:GFP	-3801.83	0.90747
w*;nompC[3],UAS-NompC::GFP/nompC[3];nompC-GAL4	NOMPC:GFP	-3786.98	0.9066
w*;nompC[3],UAS-NompC::GFP/nompC[3];nompC-GAL4	NOMPC:GFP	-3772.13	0.90571
w*;nompC[3],UAS-NompC::GFP/nompC[3];nompC-GAL4	NOMPC:GFP	-3757.28	0.90482
w*;nompC[3],UAS-NompC::GFP/nompC[3];nompC-GAL4	NOMPC:GFP	-3742.43	0.90392
w*;nompC[3],UAS-NompC::GFP/nompC[3];nompC-GAL4	NOMPC:GFP	-3727.58	0.90301
w*;nompC[3],UAS-NompC::GFP/nompC[3];nompC-GAL4	NOMPC:GFP	-3712.72	0.9021
w*;nompC[3],UAS-NompC::GFP/nompC[3];nompC-GAL4	NOMPC:GFP	-3697.87	0.90117
w*;nompC[3],UAS-NompC::GFP/nompC[3];nompC-GAL4	NOMPC:GFP	-3683.02	0.90024
w*;nompC[3],UAS-NompC::GFP/nompC[3];nompC-GAL4	NOMPC:GFP	-3668.17	0.8993
w*;nompC[3],UAS-NompC::GFP/nompC[3];nompC-GAL4	NOMPC:GFP	-3653.32	0.89834
w*;nompC[3],UAS-NompC::GFP/nompC[3];nompC-GAL4	NOMPC:GFP	-3638.47	0.89738
w*;nompC[3],UAS-NompC::GFP/nompC[3];nompC-GAL4	NOMPC:GFP	-3623.62	0.89641
w*;nompC[3],UAS-NompC::GFP/nompC[3];nompC-GAL4	NOMPC:GFP	-3608.77	0.89543
w*;nompC[3],UAS-NompC::GFP/nompC[3];nompC-GAL4	NOMPC:GFP	-3593.92	0.89445
w*;nompC[3],UAS-NompC::GFP/nompC[3];nompC-GAL4	NOMPC:GFP	-3579.07	0.89345
w*;nompC[3],UAS-NompC::GFP/nompC[3];nompC-GAL4	NOMPC:GFP	-3564.22	0.89244
w*;nompC[3],UAS-NompC::GFP/nompC[3];nompC-GAL4	NOMPC:GFP	-3549.36	0.89142
w*;nompC[3],UAS-NompC::GFP/nompC[3];nompC-GAL4	NOMPC:GFP	-3534.51	0.8904
w*;nompC[3],UAS-NompC::GFP/nompC[3];nompC-GAL4	NOMPC:GFP	-3519.66	0.88936
w*;nompC[3],UAS-NompC::GFP/nompC[3];nompC-GAL4	NOMPC:GFP	-3504.81	0.88832
w*;nompC[3],UAS-NompC::GFP/nompC[3];nompC-GAL4	NOMPC:GFP	-3489.96	0.88726
w*;nompC[3],UAS-NompC::GFP/nompC[3];nompC-GAL4	NOMPC:GFP	-3475.11	0.8862
w*;nompC[3],UAS-NompC::GFP/nompC[3];nompC-GAL4	NOMPC:GFP	-3460.26	0.88512
w*;nompC[3],UAS-NompC::GFP/nompC[3];nompC-GAL4	NOMPC:GFP	-3445.41	0.88403
w*;nompC[3],UAS-NompC::GFP/nompC[3];nompC-GAL4	NOMPC:GFP	-3430.56	0.88294
w*;nompC[3],UAS-NompC::GFP/nompC[3];nompC-GAL4	NOMPC:GFP	-3415.71	0.88183
w*;nompC[3],UAS-NompC::GFP/nompC[3];nompC-GAL4	NOMPC:GFP	-3400.86	0.88071
w*;nompC[3],UAS-NompC::GFP/nompC[3];nompC-GAL4	NOMPC:GFP	-3386	0.87959
w*;nompC[3],UAS-NompC::GFP/nompC[3];nompC-GAL4	NOMPC:GFP	-3371.15	0.87845
w*;nompC[3],UAS-NompC::GFP/nompC[3];nompC-GAL4	NOMPC:GFP	-3356.3	0.8773
w*;nompC[3],UAS-NompC::GFP/nompC[3];nompC-GAL4	NOMPC:GFP	-3341.45	0.87614
w*;nompC[3],UAS-NompC::GFP/nompC[3];nompC-GAL4	NOMPC:GFP	-3326.6	0.87497
w*;nompC[3],UAS-NompC::GFP/nompC[3];nompC-GAL4	NOMPC:GFP	-3311.75	0.87379
w*;nompC[3],UAS-NompC::GFP/nompC[3];nompC-GAL4	NOMPC:GFP	-3296.9	0.8726
w*;nompC[3],UAS-NompC::GFP/nompC[3];nompC-GAL4	NOMPC:GFP	-3282.05	0.87139
w*;nompC[3],UAS-NompC::GFP/nompC[3];nompC-GAL4	NOMPC:GFP	-3267.2	0.87018
w*;nompC[3],UAS-NompC::GFP/nompC[3];nompC-GAL4	NOMPC:GFP	-3266.88	0.87015
w*;nompC[3],UAS-NompC::GFP/nompC[3];nompC-GAL4	NOMPC:GFP	-3252.35	0.86895
w*;nompC[3],UAS-NompC::GFP/nompC[3];nompC-GAL4	NOMPC:GFP	-3250.91	0.86883
w*;nompC[3],UAS-NompC::GFP/nompC[3];nompC-GAL4	NOMPC:GFP	-3237.5	0.86771
w*;nompC[3],UAS-NompC::GFP/nompC[3];nompC-GAL4	NOMPC:GFP	-3222.64	0.86646
w*;nompC[3],UAS-NompC::GFP/nompC[3];nompC-GAL4	NOMPC:GFP	-3207.79	0.8652
w*;nompC[3],UAS-NompC::GFP/nompC[3];nompC-GAL4	NOMPC:GFP	-3192.94	0.86392
w*;nompC[3],UAS-NompC::GFP/nompC[3];nompC-GAL4	NOMPC:GFP	-3191.33	0.86378
w*;nompC[3],UAS-NompC::GFP/nompC[3];nompC-GAL4	NOMPC:GFP	-3178.09	0.86264
w*;nompC[3],UAS-NompC::GFP/nompC[3];nompC-GAL4	NOMPC:GFP	-3163.24	0.86134
w*;nompC[3],UAS-NompC::GFP/nompC[3];nompC-GAL4	NOMPC:GFP	-3148.39	0.86003
w*;nompC[3],UAS-NompC::GFP/nompC[3];nompC-GAL4	NOMPC:GFP	-3133.54	0.85871
w*;nompC[3],UAS-NompC::GFP/nompC[3];nompC-GAL4	NOMPC:GFP	-3118.69	0.85737
w*;nompC[3],UAS-NompC::GFP/nompC[3];nompC-GAL4	NOMPC:GFP	-3103.84	0.85602
w*;nompC[3],UAS-NompC::GFP/nompC[3];nompC-GAL4	NOMPC:GFP	-3102.15	0.85587
w*;nompC[3],UAS-NompC::GFP/nompC[3];nompC-GAL4	NOMPC:GFP	-3088.99	0.85466
w*;nompC[3],UAS-NompC::GFP/nompC[3];nompC-GAL4	NOMPC:GFP	-3074.14	0.85329
w*;nompC[3],UAS-NompC::GFP/nompC[3];nompC-GAL4	NOMPC:GFP	-3059.28	0.8519
w*;nompC[3],UAS-NompC::GFP/nompC[3];nompC-GAL4	NOMPC:GFP	-3044.43	0.8505
w*;nompC[3],UAS-NompC::GFP/nompC[3];nompC-GAL4	NOMPC:GFP	-3029.58	0.84909
w*;nompC[3],UAS-NompC::GFP/nompC[3];nompC-GAL4	NOMPC:GFP	-3014.73	0.84766
w*;nompC[3],UAS-NompC::GFP/nompC[3];nompC-GAL4	NOMPC:GFP	-2999.88	0.84622
w*;nompC[3],UAS-NompC::GFP/nompC[3];nompC-GAL4	NOMPC:GFP	-2985.03	0.84477
w*;nompC[3],UAS-NompC::GFP/nompC[3];nompC-GAL4	NOMPC:GFP	-2970.18	0.8433
w*;nompC[3],UAS-NompC::GFP/nompC[3];nompC-GAL4	NOMPC:GFP	-2955.33	0.84182
w*;nompC[3],UAS-NompC::GFP/nompC[3];nompC-GAL4	NOMPC:GFP	-2940.48	0.84033
w*;nompC[3],UAS-NompC::GFP/nompC[3];nompC-GAL4	NOMPC:GFP	-2925.63	0.83882
w*;nompC[3],UAS-NompC::GFP/nompC[3];nompC-GAL4	NOMPC:GFP	-2910.78	0.83729
w*;nompC[3],UAS-NompC::GFP/nompC[3];nompC-GAL4	NOMPC:GFP	-2895.92	0.83575
w*;nompC[3],UAS-NompC::GFP/nompC[3];nompC-GAL4	NOMPC:GFP	-2881.07	0.8342
w*;nompC[3],UAS-NompC::GFP/nompC[3];nompC-GAL4	NOMPC:GFP	-2866.22	0.83264
w*;nompC[3],UAS-NompC::GFP/nompC[3];nompC-GAL4	NOMPC:GFP	-2853.12	0.83124
w*;nompC[3],UAS-NompC::GFP/nompC[3];nompC-GAL4	NOMPC:GFP	-2851.37	0.83105
w*;nompC[3],UAS-NompC::GFP/nompC[3];nompC-GAL4	NOMPC:GFP	-2836.52	0.82946
w*;nompC[3],UAS-NompC::GFP/nompC[3];nompC-GAL4	NOMPC:GFP	-2834.53	0.82924
w*;nompC[3],UAS-NompC::GFP/nompC[3];nompC-GAL4	NOMPC:GFP	-2831.73	0.82894
w*;nompC[3],UAS-NompC::GFP/nompC[3];nompC-GAL4	NOMPC:GFP	-2821.67	0.82785
w*;nompC[3],UAS-NompC::GFP/nompC[3];nompC-GAL4	NOMPC:GFP	-2806.82	0.82622
w*;nompC[3],UAS-NompC::GFP/nompC[3];nompC-GAL4	NOMPC:GFP	-2801.73	0.82566
w*;nompC[3],UAS-NompC::GFP/nompC[3];nompC-GAL4	NOMPC:GFP	-2791.97	0.82458
w*;nompC[3],UAS-NompC::GFP/nompC[3];nompC-GAL4	NOMPC:GFP	-2777.12	0.82292
w*;nompC[3],UAS-NompC::GFP/nompC[3];nompC-GAL4	NOMPC:GFP	-2762.27	0.82124
w*;nompC[3],UAS-NompC::GFP/nompC[3];nompC-GAL4	NOMPC:GFP	-2747.42	0.81955
w*;nompC[3],UAS-NompC::GFP/nompC[3];nompC-GAL4	NOMPC:GFP	-2746.95	0.8195
w*;nompC[3],UAS-NompC::GFP/nompC[3];nompC-GAL4	NOMPC:GFP	-2732.57	0.81785
w*;nompC[3],UAS-NompC::GFP/nompC[3];nompC-GAL4	NOMPC:GFP	-2717.71	0.81613
w*;nompC[3],UAS-NompC::GFP/nompC[3];nompC-GAL4	NOMPC:GFP	-2710.41	0.81527
w*;nompC[3],UAS-NompC::GFP/nompC[3];nompC-GAL4	NOMPC:GFP	-2702.86	0.81439
w*;nompC[3],UAS-NompC::GFP/nompC[3];nompC-GAL4	NOMPC:GFP	-2688.01	0.81264
w*;nompC[3],UAS-NompC::GFP/nompC[3];nompC-GAL4	NOMPC:GFP	-2673.16	0.81086
w*;nompC[3],UAS-NompC::GFP/nompC[3];nompC-GAL4	NOMPC:GFP	-2658.31	0.80908
w*;nompC[3],UAS-NompC::GFP/nompC[3];nompC-GAL4	NOMPC:GFP	-2643.46	0.80727
w*;nompC[3],UAS-NompC::GFP/nompC[3];nompC-GAL4	NOMPC:GFP	-2628.61	0.80545
w*;nompC[3],UAS-NompC::GFP/nompC[3];nompC-GAL4	NOMPC:GFP	-2613.76	0.80361
w*;nompC[3],UAS-NompC::GFP/nompC[3];nompC-GAL4	NOMPC:GFP	-2598.91	0.80176
w*;nompC[3],UAS-NompC::GFP/nompC[3];nompC-GAL4	NOMPC:GFP	-2584.06	0.79988
w*;nompC[3],UAS-NompC::GFP/nompC[3];nompC-GAL4	NOMPC:GFP	-2569.21	0.79799
w*;nompC[3],UAS-NompC::GFP/nompC[3];nompC-GAL4	NOMPC:GFP	-2554.35	0.79608
w*;nompC[3],UAS-NompC::GFP/nompC[3];nompC-GAL4	NOMPC:GFP	-2539.5	0.79416
w*;nompC[3],UAS-NompC::GFP/nompC[3];nompC-GAL4	NOMPC:GFP	-2524.65	0.79221
w*;nompC[3],UAS-NompC::GFP/nompC[3];nompC-GAL4	NOMPC:GFP	-2509.8	0.79025
w*;nompC[3],UAS-NompC::GFP/nompC[3];nompC-GAL4	NOMPC:GFP	-2494.95	0.78826
w*;nompC[3],UAS-NompC::GFP/nompC[3];nompC-GAL4	NOMPC:GFP	-2480.1	0.78626
w*;nompC[3],UAS-NompC::GFP/nompC[3];nompC-GAL4	NOMPC:GFP	-2465.25	0.78424
w*;nompC[3],UAS-NompC::GFP/nompC[3];nompC-GAL4	NOMPC:GFP	-2450.4	0.7822
w*;nompC[3],UAS-NompC::GFP/nompC[3];nompC-GAL4	NOMPC:GFP	-2447.54	0.78181
w*;nompC[3],UAS-NompC::GFP/nompC[3];nompC-GAL4	NOMPC:GFP	-2439.97	0.78076
w*;nompC[3],UAS-NompC::GFP/nompC[3];nompC-GAL4	NOMPC:GFP	-2435.55	0.78014
w*;nompC[3],UAS-NompC::GFP/nompC[3];nompC-GAL4	NOMPC:GFP	-2420.7	0.77807
w*;nompC[3],UAS-NompC::GFP/nompC[3];nompC-GAL4	NOMPC:GFP	-2405.85	0.77597
w*;nompC[3],UAS-NompC::GFP/nompC[3];nompC-GAL4	NOMPC:GFP	-2390.99	0.77385
w*;nompC[3],UAS-NompC::GFP/nompC[3];nompC-GAL4	NOMPC:GFP	-2376.14	0.77171
w*;nompC[3],UAS-NompC::GFP/nompC[3];nompC-GAL4	NOMPC:GFP	-2361.29	0.76956
w*;nompC[3],UAS-NompC::GFP/nompC[3];nompC-GAL4	NOMPC:GFP	-2347.35	0.76751
w*;nompC[3],UAS-NompC::GFP/nompC[3];nompC-GAL4	NOMPC:GFP	-2346.44	0.76738
w*;nompC[3],UAS-NompC::GFP/nompC[3];nompC-GAL4	NOMPC:GFP	-2344.65	0.76712
w*;nompC[3],UAS-NompC::GFP/nompC[3];nompC-GAL4	NOMPC:GFP	-2331.59	0.76518
w*;nompC[3],UAS-NompC::GFP/nompC[3];nompC-GAL4	NOMPC:GFP	-2316.74	0.76296
w*;nompC[3],UAS-NompC::GFP/nompC[3];nompC-GAL4	NOMPC:GFP	-2301.89	0.76072
w*;nompC[3],UAS-NompC::GFP/nompC[3];nompC-GAL4	NOMPC:GFP	-2287.04	0.75846
w*;nompC[3],UAS-NompC::GFP/nompC[3];nompC-GAL4	NOMPC:GFP	-2277.15	0.75694
w*;nompC[3],UAS-NompC::GFP/nompC[3];nompC-GAL4	NOMPC:GFP	-2272.19	0.75618
w*;nompC[3],UAS-NompC::GFP/nompC[3];nompC-GAL4	NOMPC:GFP	-2257.34	0.75387
w*;nompC[3],UAS-NompC::GFP/nompC[3];nompC-GAL4	NOMPC:GFP	-2242.49	0.75155
w*;nompC[3],UAS-NompC::GFP/nompC[3];nompC-GAL4	NOMPC:GFP	-2237.93	0.75083
w*;nompC[3],UAS-NompC::GFP/nompC[3];nompC-GAL4	NOMPC:GFP	-2227.63	0.7492
w*;nompC[3],UAS-NompC::GFP/nompC[3];nompC-GAL4	NOMPC:GFP	-2212.78	0.74683
w*;nompC[3],UAS-NompC::GFP/nompC[3];nompC-GAL4	NOMPC:GFP	-2197.93	0.74444
w*;nompC[3],UAS-NompC::GFP/nompC[3];nompC-GAL4	NOMPC:GFP	-2183.08	0.74202
w*;nompC[3],UAS-NompC::GFP/nompC[3];nompC-GAL4	NOMPC:GFP	-2168.23	0.73958
w*;nompC[3],UAS-NompC::GFP/nompC[3];nompC-GAL4	NOMPC:GFP	-2153.38	0.73712
w*;nompC[3],UAS-NompC::GFP/nompC[3];nompC-GAL4	NOMPC:GFP	-2138.53	0.73464
w*;nompC[3],UAS-NompC::GFP/nompC[3];nompC-GAL4	NOMPC:GFP	-2123.68	0.73213
w*;nompC[3],UAS-NompC::GFP/nompC[3];nompC-GAL4	NOMPC:GFP	-2108.83	0.7296
w*;nompC[3],UAS-NompC::GFP/nompC[3];nompC-GAL4	NOMPC:GFP	-2093.98	0.72704
w*;nompC[3],UAS-NompC::GFP/nompC[3];nompC-GAL4	NOMPC:GFP	-2079.13	0.72446
w*;nompC[3],UAS-NompC::GFP/nompC[3];nompC-GAL4	NOMPC:GFP	-2064.27	0.72186
w*;nompC[3],UAS-NompC::GFP/nompC[3];nompC-GAL4	NOMPC:GFP	-2053.21	0.7199
w*;nompC[3],UAS-NompC::GFP/nompC[3];nompC-GAL4	NOMPC:GFP	-2049.42	0.71923
w*;nompC[3],UAS-NompC::GFP/nompC[3];nompC-GAL4	NOMPC:GFP	-2034.57	0.71658
w*;nompC[3],UAS-NompC::GFP/nompC[3];nompC-GAL4	NOMPC:GFP	-2021.85	0.71428
w*;nompC[3],UAS-NompC::GFP/nompC[3];nompC-GAL4	NOMPC:GFP	-2019.72	0.7139
w*;nompC[3],UAS-NompC::GFP/nompC[3];nompC-GAL4	NOMPC:GFP	-2004.87	0.71119
w*;nompC[3],UAS-NompC::GFP/nompC[3];nompC-GAL4	NOMPC:GFP	-1990.02	0.70847
w*;nompC[3],UAS-NompC::GFP/nompC[3];nompC-GAL4	NOMPC:GFP	-1975.17	0.70571
w*;nompC[3],UAS-NompC::GFP/nompC[3];nompC-GAL4	NOMPC:GFP	-1960.32	0.70293
w*;nompC[3],UAS-NompC::GFP/nompC[3];nompC-GAL4	NOMPC:GFP	-1945.47	0.70012
w*;nompC[3],UAS-NompC::GFP/nompC[3];nompC-GAL4	NOMPC:GFP	-1930.62	0.69729
w*;nompC[3],UAS-NompC::GFP/nompC[3];nompC-GAL4	NOMPC:GFP	-1915.77	0.69443
w*;nompC[3],UAS-NompC::GFP/nompC[3];nompC-GAL4	NOMPC:GFP	-1900.91	0.69154
w*;nompC[3],UAS-NompC::GFP/nompC[3];nompC-GAL4	NOMPC:GFP	-1886.06	0.68862
w*;nompC[3],UAS-NompC::GFP/nompC[3];nompC-GAL4	NOMPC:GFP	-1871.21	0.68568
w*;nompC[3],UAS-NompC::GFP/nompC[3];nompC-GAL4	NOMPC:GFP	-1856.36	0.68271
w*;nompC[3],UAS-NompC::GFP/nompC[3];nompC-GAL4	NOMPC:GFP	-1854.3	0.6823
w*;nompC[3],UAS-NompC::GFP/nompC[3];nompC-GAL4	NOMPC:GFP	-1842.62	0.67994
w*;nompC[3],UAS-NompC::GFP/nompC[3];nompC-GAL4	NOMPC:GFP	-1841.51	0.67971
w*;nompC[3],UAS-NompC::GFP/nompC[3];nompC-GAL4	NOMPC:GFP	-1826.66	0.67669
w*;nompC[3],UAS-NompC::GFP/nompC[3];nompC-GAL4	NOMPC:GFP	-1811.81	0.67363
w*;nompC[3],UAS-NompC::GFP/nompC[3];nompC-GAL4	NOMPC:GFP	-1802.01	0.6716
w*;nompC[3],UAS-NompC::GFP/nompC[3];nompC-GAL4	NOMPC:GFP	-1796.96	0.67055
w*;nompC[3],UAS-NompC::GFP/nompC[3];nompC-GAL4	NOMPC:GFP	-1782.11	0.66743
w*;nompC[3],UAS-NompC::GFP/nompC[3];nompC-GAL4	NOMPC:GFP	-1767.26	0.66429
w*;nompC[3],UAS-NompC::GFP/nompC[3];nompC-GAL4	NOMPC:GFP	-1752.41	0.66112
w*;nompC[3],UAS-NompC::GFP/nompC[3];nompC-GAL4	NOMPC:GFP	-1737.55	0.65792
w*;nompC[3],UAS-NompC::GFP/nompC[3];nompC-GAL4	NOMPC:GFP	-1722.7	0.65468
w*;nompC[3],UAS-NompC::GFP/nompC[3];nompC-GAL4	NOMPC:GFP	-1717.11	0.65346
w*;nompC[3],UAS-NompC::GFP/nompC[3];nompC-GAL4	NOMPC:GFP	-1707.85	0.65142
w*;nompC[3],UAS-NompC::GFP/nompC[3];nompC-GAL4	NOMPC:GFP	-1693	0.64813
w*;nompC[3],UAS-NompC::GFP/nompC[3];nompC-GAL4	NOMPC:GFP	-1678.15	0.6448
w*;nompC[3],UAS-NompC::GFP/nompC[3];nompC-GAL4	NOMPC:GFP	-1663.3	0.64144
w*;nompC[3],UAS-NompC::GFP/nompC[3];nompC-GAL4	NOMPC:GFP	-1648.45	0.63806
w*;nompC[3],UAS-NompC::GFP/nompC[3];nompC-GAL4	NOMPC:GFP	-1633.6	0.63464
w*;nompC[3],UAS-NompC::GFP/nompC[3];nompC-GAL4	NOMPC:GFP	-1618.75	0.63118
w*;nompC[3],UAS-NompC::GFP/nompC[3];nompC-GAL4	NOMPC:GFP	-1612.02	0.62961
w*;nompC[3],UAS-NompC::GFP/nompC[3];nompC-GAL4	NOMPC:GFP	-1603.9	0.6277
w*;nompC[3],UAS-NompC::GFP/nompC[3];nompC-GAL4	NOMPC:GFP	-1589.05	0.62418
w*;nompC[3],UAS-NompC::GFP/nompC[3];nompC-GAL4	NOMPC:GFP	-1581.4	0.62235
w*;nompC[3],UAS-NompC::GFP/nompC[3];nompC-GAL4	NOMPC:GFP	-1574.2	0.62063
w*;nompC[3],UAS-NompC::GFP/nompC[3];nompC-GAL4	NOMPC:GFP	-1559.34	0.61704
w*;nompC[3],UAS-NompC::GFP/nompC[3];nompC-GAL4	NOMPC:GFP	-1544.49	0.61342
w*;nompC[3],UAS-NompC::GFP/nompC[3];nompC-GAL4	NOMPC:GFP	-1529.64	0.60977
w*;nompC[3],UAS-NompC::GFP/nompC[3];nompC-GAL4	NOMPC:GFP	-1514.79	0.60608
w*;nompC[3],UAS-NompC::GFP/nompC[3];nompC-GAL4	NOMPC:GFP	-1499.94	0.60236
w*;nompC[3],UAS-NompC::GFP/nompC[3];nompC-GAL4	NOMPC:GFP	-1485.09	0.5986
w*;nompC[3],UAS-NompC::GFP/nompC[3];nompC-GAL4	NOMPC:GFP	-1470.24	0.59481
w*;nompC[3],UAS-NompC::GFP/nompC[3];nompC-GAL4	NOMPC:GFP	-1455.39	0.59098
w*;nompC[3],UAS-NompC::GFP/nompC[3];nompC-GAL4	NOMPC:GFP	-1440.54	0.58712
w*;nompC[3],UAS-NompC::GFP/nompC[3];nompC-GAL4	NOMPC:GFP	-1425.69	0.58321
w*;nompC[3],UAS-NompC::GFP/nompC[3];nompC-GAL4	NOMPC:GFP	-1410.84	0.57928
w*;nompC[3],UAS-NompC::GFP/nompC[3];nompC-GAL4	NOMPC:GFP	-1395.98	0.5753
w*;nompC[3],UAS-NompC::GFP/nompC[3];nompC-GAL4	NOMPC:GFP	-1381.13	0.57129
w*;nompC[3],UAS-NompC::GFP/nompC[3];nompC-GAL4	NOMPC:GFP	-1366.28	0.56724
w*;nompC[3],UAS-NompC::GFP/nompC[3];nompC-GAL4	NOMPC:GFP	-1351.43	0.56315
w*;nompC[3],UAS-NompC::GFP/nompC[3];nompC-GAL4	NOMPC:GFP	-1336.58	0.55902
w*;nompC[3],UAS-NompC::GFP/nompC[3];nompC-GAL4	NOMPC:GFP	-1321.73	0.55485
w*;nompC[3],UAS-NompC::GFP/nompC[3];nompC-GAL4	NOMPC:GFP	-1313.88	0.55263
w*;nompC[3],UAS-NompC::GFP/nompC[3];nompC-GAL4	NOMPC:GFP	-1306.88	0.55065
w*;nompC[3],UAS-NompC::GFP/nompC[3];nompC-GAL4	NOMPC:GFP	-1292.03	0.5464
w*;nompC[3],UAS-NompC::GFP/nompC[3];nompC-GAL4	NOMPC:GFP	-1289.01	0.54553
w*;nompC[3],UAS-NompC::GFP/nompC[3];nompC-GAL4	NOMPC:GFP	-1277.18	0.54211
w*;nompC[3],UAS-NompC::GFP/nompC[3];nompC-GAL4	NOMPC:GFP	-1271.18	0.54037
w*;nompC[3],UAS-NompC::GFP/nompC[3];nompC-GAL4	NOMPC:GFP	-1262.33	0.53779
w*;nompC[3],UAS-NompC::GFP/nompC[3];nompC-GAL4	NOMPC:GFP	-1247.48	0.53342
w*;nompC[3],UAS-NompC::GFP/nompC[3];nompC-GAL4	NOMPC:GFP	-1232.62	0.52901
w*;nompC[3],UAS-NompC::GFP/nompC[3];nompC-GAL4	NOMPC:GFP	-1220.69	0.52544
w*;nompC[3],UAS-NompC::GFP/nompC[3];nompC-GAL4	NOMPC:GFP	-1217.77	0.52456
w*;nompC[3],UAS-NompC::GFP/nompC[3];nompC-GAL4	NOMPC:GFP	-1202.92	0.52007
w*;nompC[3],UAS-NompC::GFP/nompC[3];nompC-GAL4	NOMPC:GFP	-1188.07	0.51553
w*;nompC[3],UAS-NompC::GFP/nompC[3];nompC-GAL4	NOMPC:GFP	-1173.22	0.51095
w*;nompC[3],UAS-NompC::GFP/nompC[3];nompC-GAL4	NOMPC:GFP	-1158.37	0.50633
w*;nompC[3],UAS-NompC::GFP/nompC[3];nompC-GAL4	NOMPC:GFP	-1143.52	0.50167
w*;nompC[3],UAS-NompC::GFP/nompC[3];nompC-GAL4	NOMPC:GFP	-1128.67	0.49696
w*;nompC[3],UAS-NompC::GFP/nompC[3];nompC-GAL4	NOMPC:GFP	-1127.57	0.49661
w*;nompC[3],UAS-NompC::GFP/nompC[3];nompC-GAL4	NOMPC:GFP	-1113.82	0.49221
w*;nompC[3],UAS-NompC::GFP/nompC[3];nompC-GAL4	NOMPC:GFP	-1110.15	0.49103
w*;nompC[3],UAS-NompC::GFP/nompC[3];nompC-GAL4	NOMPC:GFP	-1098.97	0.48741
w*;nompC[3],UAS-NompC::GFP/nompC[3];nompC-GAL4	NOMPC:GFP	-1084.12	0.48257
w*;nompC[3],UAS-NompC::GFP/nompC[3];nompC-GAL4	NOMPC:GFP	-1069.26	0.47768
w*;nompC[3],UAS-NompC::GFP/nompC[3];nompC-GAL4	NOMPC:GFP	-1054.41	0.47274
w*;nompC[3],UAS-NompC::GFP/nompC[3];nompC-GAL4	NOMPC:GFP	-1039.56	0.46776
w*;nompC[3],UAS-NompC::GFP/nompC[3];nompC-GAL4	NOMPC:GFP	-1024.71	0.46273
w*;nompC[3],UAS-NompC::GFP/nompC[3];nompC-GAL4	NOMPC:GFP	-1009.86	0.45765
w*;nompC[3],UAS-NompC::GFP/nompC[3];nompC-GAL4	NOMPC:GFP	-995.01	0.45253
w*;nompC[3],UAS-NompC::GFP/nompC[3];nompC-GAL4	NOMPC:GFP	-980.159	0.44736
w*;nompC[3],UAS-NompC::GFP/nompC[3];nompC-GAL4	NOMPC:GFP	-965.308	0.44213
w*;nompC[3],UAS-NompC::GFP/nompC[3];nompC-GAL4	NOMPC:GFP	-950.457	0.43686
w*;nompC[3],UAS-NompC::GFP/nompC[3];nompC-GAL4	NOMPC:GFP	-935.607	0.43154
w*;nompC[3],UAS-NompC::GFP/nompC[3];nompC-GAL4	NOMPC:GFP	-920.756	0.42617
w*;nompC[3],UAS-NompC::GFP/nompC[3];nompC-GAL4	NOMPC:GFP	-905.905	0.42075
w*;nompC[3],UAS-NompC::GFP/nompC[3];nompC-GAL4	NOMPC:GFP	-891.054	0.41528
w*;nompC[3],UAS-NompC::GFP/nompC[3];nompC-GAL4	NOMPC:GFP	-876.203	0.40975
w*;nompC[3],UAS-NompC::GFP/nompC[3];nompC-GAL4	NOMPC:GFP	-861.352	0.40418
w*;nompC[3],UAS-NompC::GFP/nompC[3];nompC-GAL4	NOMPC:GFP	-846.501	0.39855
w*;nompC[3],UAS-NompC::GFP/nompC[3];nompC-GAL4	NOMPC:GFP	-831.65	0.39286
w*;nompC[3],UAS-NompC::GFP/nompC[3];nompC-GAL4	NOMPC:GFP	-816.799	0.38713
w*;nompC[3],UAS-NompC::GFP/nompC[3];nompC-GAL4	NOMPC:GFP	-801.948	0.38134
w*;nompC[3],UAS-NompC::GFP/nompC[3];nompC-GAL4	NOMPC:GFP	-787.098	0.37549
w*;nompC[3],UAS-NompC::GFP/nompC[3];nompC-GAL4	NOMPC:GFP	-772.247	0.36959
w*;nompC[3],UAS-NompC::GFP/nompC[3];nompC-GAL4	NOMPC:GFP	-757.396	0.36364
w*;nompC[3],UAS-NompC::GFP/nompC[3];nompC-GAL4	NOMPC:GFP	-742.545	0.35762
w*;nompC[3],UAS-NompC::GFP/nompC[3];nompC-GAL4	NOMPC:GFP	-727.694	0.35155
w*;nompC[3],UAS-NompC::GFP/nompC[3];nompC-GAL4	NOMPC:GFP	-712.843	0.34543
w*;nompC[3],UAS-NompC::GFP/nompC[3];nompC-GAL4	NOMPC:GFP	-703.379	0.34149
w*;nompC[3],UAS-NompC::GFP/nompC[3];nompC-GAL4	NOMPC:GFP	-697.992	0.33924
w*;nompC[3],UAS-NompC::GFP/nompC[3];nompC-GAL4	NOMPC:GFP	-683.141	0.333
w*;nompC[3],UAS-NompC::GFP/nompC[3];nompC-GAL4	NOMPC:GFP	-675.299	0.32968
w*;nompC[3],UAS-NompC::GFP/nompC[3];nompC-GAL4	NOMPC:GFP	-670.743	0.32774
w*;nompC[3],UAS-NompC::GFP/nompC[3];nompC-GAL4	NOMPC:GFP	-668.29	0.3267
w*;nompC[3],UAS-NompC::GFP/nompC[3];nompC-GAL4	NOMPC:GFP	-653.439	0.32034
w*;nompC[3],UAS-NompC::GFP/nompC[3];nompC-GAL4	NOMPC:GFP	-647.81	0.31791
w*;nompC[3],UAS-NompC::GFP/nompC[3];nompC-GAL4	NOMPC:GFP	-638.589	0.31392
w*;nompC[3],UAS-NompC::GFP/nompC[3];nompC-GAL4	NOMPC:GFP	-623.738	0.30743
w*;nompC[3],UAS-NompC::GFP/nompC[3];nompC-GAL4	NOMPC:GFP	-608.887	0.30089
w*;nompC[3],UAS-NompC::GFP/nompC[3];nompC-GAL4	NOMPC:GFP	-594.036	0.29429
w*;nompC[3],UAS-NompC::GFP/nompC[3];nompC-GAL4	NOMPC:GFP	-579.185	0.28762
w*;nompC[3],UAS-NompC::GFP/nompC[3];nompC-GAL4	NOMPC:GFP	-566.894	0.28205
w*;nompC[3],UAS-NompC::GFP/nompC[3];nompC-GAL4	NOMPC:GFP	-564.334	0.28089
w*;nompC[3],UAS-NompC::GFP/nompC[3];nompC-GAL4	NOMPC:GFP	-562.956	0.28026
w*;nompC[3],UAS-NompC::GFP/nompC[3];nompC-GAL4	NOMPC:GFP	-549.483	0.2741
w*;nompC[3],UAS-NompC::GFP/nompC[3];nompC-GAL4	NOMPC:GFP	-534.632	0.26724
w*;nompC[3],UAS-NompC::GFP/nompC[3];nompC-GAL4	NOMPC:GFP	-519.781	0.26031
w*;nompC[3],UAS-NompC::GFP/nompC[3];nompC-GAL4	NOMPC:GFP	-504.93	0.25333
w*;nompC[3],UAS-NompC::GFP/nompC[3];nompC-GAL4	NOMPC:GFP	-490.08	0.24627
w*;nompC[3],UAS-NompC::GFP/nompC[3];nompC-GAL4	NOMPC:GFP	-475.229	0.23915
w*;nompC[3],UAS-NompC::GFP/nompC[3];nompC-GAL4	NOMPC:GFP	-460.378	0.23196
w*;nompC[3],UAS-NompC::GFP/nompC[3];nompC-GAL4	NOMPC:GFP	-445.527	0.22471
w*;nompC[3],UAS-NompC::GFP/nompC[3];nompC-GAL4	NOMPC:GFP	-434.231	0.21914
w*;nompC[3],UAS-NompC::GFP/nompC[3];nompC-GAL4	NOMPC:GFP	-430.676	0.21738
w*;nompC[3],UAS-NompC::GFP/nompC[3];nompC-GAL4	NOMPC:GFP	-415.825	0.20999
w*;nompC[3],UAS-NompC::GFP/nompC[3];nompC-GAL4	NOMPC:GFP	-415.317	0.20974
w*;nompC[3],UAS-NompC::GFP/nompC[3];nompC-GAL4	NOMPC:GFP	-407.028	0.20558
w*;nompC[3],UAS-NompC::GFP/nompC[3];nompC-GAL4	NOMPC:GFP	-401.024	0.20255
w*;nompC[3],UAS-NompC::GFP/nompC[3];nompC-GAL4	NOMPC:GFP	-400.974	0.20253
w*;nompC[3],UAS-NompC::GFP/nompC[3];nompC-GAL4	NOMPC:GFP	-386.123	0.19499
w*;nompC[3],UAS-NompC::GFP/nompC[3];nompC-GAL4	NOMPC:GFP	-371.272	0.18739
w*;nompC[3],UAS-NompC::GFP/nompC[3];nompC-GAL4	NOMPC:GFP	-356.422	0.17971
w*;nompC[3],UAS-NompC::GFP/nompC[3];nompC-GAL4	NOMPC:GFP	-341.571	0.17196
w*;nompC[3],UAS-NompC::GFP/nompC[3];nompC-GAL4	NOMPC:GFP	-335.681	0.16887
w*;nompC[3],UAS-NompC::GFP/nompC[3];nompC-GAL4	NOMPC:GFP	-331.883	0.16687
w*;nompC[3],UAS-NompC::GFP/nompC[3];nompC-GAL4	NOMPC:GFP	-326.72	0.16414
w*;nompC[3],UAS-NompC::GFP/nompC[3];nompC-GAL4	NOMPC:GFP	-311.869	0.15625
w*;nompC[3],UAS-NompC::GFP/nompC[3];nompC-GAL4	NOMPC:GFP	-297.018	0.14828
w*;nompC[3],UAS-NompC::GFP/nompC[3];nompC-GAL4	NOMPC:GFP	-282.167	0.14023
w*;nompC[3],UAS-NompC::GFP/nompC[3];nompC-GAL4	NOMPC:GFP	-276.191	0.13697
w*;nompC[3],UAS-NompC::GFP/nompC[3];nompC-GAL4	NOMPC:GFP	-267.316	0.13211
w*;nompC[3],UAS-NompC::GFP/nompC[3];nompC-GAL4	NOMPC:GFP	-260.771	0.1285
w*;nompC[3],UAS-NompC::GFP/nompC[3];nompC-GAL4	NOMPC:GFP	-252.465	0.12391
w*;nompC[3],UAS-NompC::GFP/nompC[3];nompC-GAL4	NOMPC:GFP	-250.586	0.12287
w*;nompC[3],UAS-NompC::GFP/nompC[3];nompC-GAL4	NOMPC:GFP	-240.82	0.11743
w*;nompC[3],UAS-NompC::GFP/nompC[3];nompC-GAL4	NOMPC:GFP	-237.614	0.11563
w*;nompC[3],UAS-NompC::GFP/nompC[3];nompC-GAL4	NOMPC:GFP	-222.763	0.10728
w*;nompC[3],UAS-NompC::GFP/nompC[3];nompC-GAL4	NOMPC:GFP	-207.913	0.09885
w*;nompC[3],UAS-NompC::GFP/nompC[3];nompC-GAL4	NOMPC:GFP	-193.062	0.09033
w*;nompC[3],UAS-NompC::GFP/nompC[3];nompC-GAL4	NOMPC:GFP	-191.303	0.08932
w*;nompC[3],UAS-NompC::GFP/nompC[3];nompC-GAL4	NOMPC:GFP	-183.102	0.08458
w*;nompC[3],UAS-NompC::GFP/nompC[3];nompC-GAL4	NOMPC:GFP	-178.211	0.08174
w*;nompC[3],UAS-NompC::GFP/nompC[3];nompC-GAL4	NOMPC:GFP	-175.997	0.08045
w*;nompC[3],UAS-NompC::GFP/nompC[3];nompC-GAL4	NOMPC:GFP	-163.36	0.07307
w*;nompC[3],UAS-NompC::GFP/nompC[3];nompC-GAL4	NOMPC:GFP	-161.297	0.07186
w*;nompC[3],UAS-NompC::GFP/nompC[3];nompC-GAL4	NOMPC:GFP	-152.862	0.06689
w*;nompC[3],UAS-NompC::GFP/nompC[3];nompC-GAL4	NOMPC:GFP	-151.16	0.06588
w*;nompC[3],UAS-NompC::GFP/nompC[3];nompC-GAL4	NOMPC:GFP	-148.509	0.06431
w*;nompC[3],UAS-NompC::GFP/nompC[3];nompC-GAL4	NOMPC:GFP	-133.658	0.05547
w*;nompC[3],UAS-NompC::GFP/nompC[3];nompC-GAL4	NOMPC:GFP	-119.806	0.04715
w*;nompC[3],UAS-NompC::GFP/nompC[3];nompC-GAL4	NOMPC:GFP	-118.807	0.04655
w*;nompC[3],UAS-NompC::GFP/nompC[3];nompC-GAL4	NOMPC:GFP	-109.891	0.04116
w*;nompC[3],UAS-NompC::GFP/nompC[3];nompC-GAL4	NOMPC:GFP	-106.705	0.03922
w*;nompC[3],UAS-NompC::GFP/nompC[3];nompC-GAL4	NOMPC:GFP	-105.032	0.0382
w*;nompC[3],UAS-NompC::GFP/nompC[3];nompC-GAL4	NOMPC:GFP	-103.956	0.03755
w*;nompC[3],UAS-NompC::GFP/nompC[3];nompC-GAL4	NOMPC:GFP	-99.7473	0.03498
w*;nompC[3],UAS-NompC::GFP/nompC[3];nompC-GAL4	NOMPC:GFP	-97.2206	0.03343
w*;nompC[3],UAS-NompC::GFP/nompC[3];nompC-GAL4	NOMPC:GFP	-89.1054	0.02845
w*;nompC[3],UAS-NompC::GFP/nompC[3];nompC-GAL4	NOMPC:GFP	-74.2545	0.01928
w*;nompC[3],UAS-NompC::GFP/nompC[3];nompC-GAL4	NOMPC:GFP	-59.4036	0.01001
w*;nompC[3],UAS-NompC::GFP/nompC[3];nompC-GAL4	NOMPC:GFP	-54.9803	0.00724
w*;nompC[3],UAS-NompC::GFP/nompC[3];nompC-GAL4	NOMPC:GFP	-49.9354	0.00406
w*;nompC[3],UAS-NompC::GFP/nompC[3];nompC-GAL4	NOMPC:GFP	-44.5527	0.00066368
w*;nompC[3],UAS-NompC::GFP/nompC[3];nompC-GAL4	NOMPC:GFP	-29.7018	-0.00878
w*;nompC[3],UAS-NompC::GFP/nompC[3];nompC-GAL4	NOMPC:GFP	-14.8509	-0.0183
w*;nompC[3],UAS-NompC::GFP/nompC[3];nompC-GAL4	NOMPC:GFP	-11.8035	-0.02027
w*;nompC[3],UAS-NompC::GFP/nompC[3];nompC-GAL4	NOMPC:GFP	-10.112	-0.02136
w*;nompC[3],UAS-NompC::GFP/nompC[3];nompC-GAL4	NOMPC:GFP	-9.91941	-0.02149
w*;nompC[3],UAS-NompC::GFP/nompC[3];nompC-GAL4	NOMPC:GFP	-1.32543	-0.02706
w*;nompC[3],UAS-NompC::GFP/nompC[3];nompC-GAL4	NOMPC:GFP	0	-0.02792
w*;nompC[3],UAS-NompC::GFP/nompC[3];nompC-GAL4	NOMPC:GFP	0	-0.02792
w*;nompC[3],UAS-NompC::GFP/nompC[3];nompC-GAL4	NOMPC:GFP	1.32543	-0.02706
w*;nompC[3],UAS-NompC::GFP/nompC[3];nompC-GAL4	NOMPC:GFP	9.91941	-0.02149
w*;nompC[3],UAS-NompC::GFP/nompC[3];nompC-GAL4	NOMPC:GFP	10.112	-0.02136
w*;nompC[3],UAS-NompC::GFP/nompC[3];nompC-GAL4	NOMPC:GFP	11.8035	-0.02027
w*;nompC[3],UAS-NompC::GFP/nompC[3];nompC-GAL4	NOMPC:GFP	14.8509	-0.0183
w*;nompC[3],UAS-NompC::GFP/nompC[3];nompC-GAL4	NOMPC:GFP	29.7018	-0.00878
w*;nompC[3],UAS-NompC::GFP/nompC[3];nompC-GAL4	NOMPC:GFP	44.5527	0.00066368
w*;nompC[3],UAS-NompC::GFP/nompC[3];nompC-GAL4	NOMPC:GFP	49.9354	0.00406
w*;nompC[3],UAS-NompC::GFP/nompC[3];nompC-GAL4	NOMPC:GFP	54.9803	0.00724
w*;nompC[3],UAS-NompC::GFP/nompC[3];nompC-GAL4	NOMPC:GFP	59.4036	0.01001
w*;nompC[3],UAS-NompC::GFP/nompC[3];nompC-GAL4	NOMPC:GFP	74.2545	0.01928
w*;nompC[3],UAS-NompC::GFP/nompC[3];nompC-GAL4	NOMPC:GFP	89.1054	0.02845
w*;nompC[3],UAS-NompC::GFP/nompC[3];nompC-GAL4	NOMPC:GFP	97.2206	0.03343
w*;nompC[3],UAS-NompC::GFP/nompC[3];nompC-GAL4	NOMPC:GFP	99.7473	0.03498
w*;nompC[3],UAS-NompC::GFP/nompC[3];nompC-GAL4	NOMPC:GFP	103.956	0.03755
w*;nompC[3],UAS-NompC::GFP/nompC[3];nompC-GAL4	NOMPC:GFP	105.032	0.0382
w*;nompC[3],UAS-NompC::GFP/nompC[3];nompC-GAL4	NOMPC:GFP	106.705	0.03922
w*;nompC[3],UAS-NompC::GFP/nompC[3];nompC-GAL4	NOMPC:GFP	109.891	0.04116
w*;nompC[3],UAS-NompC::GFP/nompC[3];nompC-GAL4	NOMPC:GFP	118.807	0.04655
w*;nompC[3],UAS-NompC::GFP/nompC[3];nompC-GAL4	NOMPC:GFP	119.806	0.04715
w*;nompC[3],UAS-NompC::GFP/nompC[3];nompC-GAL4	NOMPC:GFP	133.658	0.05547
w*;nompC[3],UAS-NompC::GFP/nompC[3];nompC-GAL4	NOMPC:GFP	148.509	0.06431
w*;nompC[3],UAS-NompC::GFP/nompC[3];nompC-GAL4	NOMPC:GFP	151.16	0.06588
w*;nompC[3],UAS-NompC::GFP/nompC[3];nompC-GAL4	NOMPC:GFP	152.862	0.06689
w*;nompC[3],UAS-NompC::GFP/nompC[3];nompC-GAL4	NOMPC:GFP	161.297	0.07186
w*;nompC[3],UAS-NompC::GFP/nompC[3];nompC-GAL4	NOMPC:GFP	163.36	0.07307
w*;nompC[3],UAS-NompC::GFP/nompC[3];nompC-GAL4	NOMPC:GFP	175.997	0.08045
w*;nompC[3],UAS-NompC::GFP/nompC[3];nompC-GAL4	NOMPC:GFP	178.211	0.08174
w*;nompC[3],UAS-NompC::GFP/nompC[3];nompC-GAL4	NOMPC:GFP	183.102	0.08458
w*;nompC[3],UAS-NompC::GFP/nompC[3];nompC-GAL4	NOMPC:GFP	191.303	0.08932
w*;nompC[3],UAS-NompC::GFP/nompC[3];nompC-GAL4	NOMPC:GFP	193.062	0.09033
w*;nompC[3],UAS-NompC::GFP/nompC[3];nompC-GAL4	NOMPC:GFP	207.913	0.09885
w*;nompC[3],UAS-NompC::GFP/nompC[3];nompC-GAL4	NOMPC:GFP	222.763	0.10728
w*;nompC[3],UAS-NompC::GFP/nompC[3];nompC-GAL4	NOMPC:GFP	237.614	0.11563
w*;nompC[3],UAS-NompC::GFP/nompC[3];nompC-GAL4	NOMPC:GFP	240.82	0.11743
w*;nompC[3],UAS-NompC::GFP/nompC[3];nompC-GAL4	NOMPC:GFP	250.586	0.12287
w*;nompC[3],UAS-NompC::GFP/nompC[3];nompC-GAL4	NOMPC:GFP	252.465	0.12391
w*;nompC[3],UAS-NompC::GFP/nompC[3];nompC-GAL4	NOMPC:GFP	260.771	0.1285
w*;nompC[3],UAS-NompC::GFP/nompC[3];nompC-GAL4	NOMPC:GFP	267.316	0.13211
w*;nompC[3],UAS-NompC::GFP/nompC[3];nompC-GAL4	NOMPC:GFP	276.191	0.13697
w*;nompC[3],UAS-NompC::GFP/nompC[3];nompC-GAL4	NOMPC:GFP	282.167	0.14023
w*;nompC[3],UAS-NompC::GFP/nompC[3];nompC-GAL4	NOMPC:GFP	297.018	0.14828
w*;nompC[3],UAS-NompC::GFP/nompC[3];nompC-GAL4	NOMPC:GFP	311.869	0.15625
w*;nompC[3],UAS-NompC::GFP/nompC[3];nompC-GAL4	NOMPC:GFP	326.72	0.16414
w*;nompC[3],UAS-NompC::GFP/nompC[3];nompC-GAL4	NOMPC:GFP	331.883	0.16687
w*;nompC[3],UAS-NompC::GFP/nompC[3];nompC-GAL4	NOMPC:GFP	335.681	0.16887
w*;nompC[3],UAS-NompC::GFP/nompC[3];nompC-GAL4	NOMPC:GFP	341.571	0.17196
w*;nompC[3],UAS-NompC::GFP/nompC[3];nompC-GAL4	NOMPC:GFP	356.422	0.17971
w*;nompC[3],UAS-NompC::GFP/nompC[3];nompC-GAL4	NOMPC:GFP	371.272	0.18739
w*;nompC[3],UAS-NompC::GFP/nompC[3];nompC-GAL4	NOMPC:GFP	386.123	0.19499
w*;nompC[3],UAS-NompC::GFP/nompC[3];nompC-GAL4	NOMPC:GFP	400.974	0.20253
w*;nompC[3],UAS-NompC::GFP/nompC[3];nompC-GAL4	NOMPC:GFP	401.024	0.20255
w*;nompC[3],UAS-NompC::GFP/nompC[3];nompC-GAL4	NOMPC:GFP	407.028	0.20558
w*;nompC[3],UAS-NompC::GFP/nompC[3];nompC-GAL4	NOMPC:GFP	415.317	0.20974
w*;nompC[3],UAS-NompC::GFP/nompC[3];nompC-GAL4	NOMPC:GFP	415.825	0.20999
w*;nompC[3],UAS-NompC::GFP/nompC[3];nompC-GAL4	NOMPC:GFP	430.676	0.21738
w*;nompC[3],UAS-NompC::GFP/nompC[3];nompC-GAL4	NOMPC:GFP	434.231	0.21914
w*;nompC[3],UAS-NompC::GFP/nompC[3];nompC-GAL4	NOMPC:GFP	445.527	0.22471
w*;nompC[3],UAS-NompC::GFP/nompC[3];nompC-GAL4	NOMPC:GFP	460.378	0.23196
w*;nompC[3],UAS-NompC::GFP/nompC[3];nompC-GAL4	NOMPC:GFP	475.229	0.23915
w*;nompC[3],UAS-NompC::GFP/nompC[3];nompC-GAL4	NOMPC:GFP	490.08	0.24627
w*;nompC[3],UAS-NompC::GFP/nompC[3];nompC-GAL4	NOMPC:GFP	504.93	0.25333
w*;nompC[3],UAS-NompC::GFP/nompC[3];nompC-GAL4	NOMPC:GFP	519.781	0.26031
w*;nompC[3],UAS-NompC::GFP/nompC[3];nompC-GAL4	NOMPC:GFP	534.632	0.26724
w*;nompC[3],UAS-NompC::GFP/nompC[3];nompC-GAL4	NOMPC:GFP	549.483	0.2741
w*;nompC[3],UAS-NompC::GFP/nompC[3];nompC-GAL4	NOMPC:GFP	562.956	0.28026
w*;nompC[3],UAS-NompC::GFP/nompC[3];nompC-GAL4	NOMPC:GFP	564.334	0.28089
w*;nompC[3],UAS-NompC::GFP/nompC[3];nompC-GAL4	NOMPC:GFP	566.894	0.28205
w*;nompC[3],UAS-NompC::GFP/nompC[3];nompC-GAL4	NOMPC:GFP	579.185	0.28762
w*;nompC[3],UAS-NompC::GFP/nompC[3];nompC-GAL4	NOMPC:GFP	594.036	0.29429
w*;nompC[3],UAS-NompC::GFP/nompC[3];nompC-GAL4	NOMPC:GFP	608.887	0.30089
w*;nompC[3],UAS-NompC::GFP/nompC[3];nompC-GAL4	NOMPC:GFP	623.738	0.30743
w*;nompC[3],UAS-NompC::GFP/nompC[3];nompC-GAL4	NOMPC:GFP	638.589	0.31392
w*;nompC[3],UAS-NompC::GFP/nompC[3];nompC-GAL4	NOMPC:GFP	647.81	0.31791
w*;nompC[3],UAS-NompC::GFP/nompC[3];nompC-GAL4	NOMPC:GFP	653.439	0.32034
w*;nompC[3],UAS-NompC::GFP/nompC[3];nompC-GAL4	NOMPC:GFP	668.29	0.3267
w*;nompC[3],UAS-NompC::GFP/nompC[3];nompC-GAL4	NOMPC:GFP	670.743	0.32774
w*;nompC[3],UAS-NompC::GFP/nompC[3];nompC-GAL4	NOMPC:GFP	675.299	0.32968
w*;nompC[3],UAS-NompC::GFP/nompC[3];nompC-GAL4	NOMPC:GFP	683.141	0.333
w*;nompC[3],UAS-NompC::GFP/nompC[3];nompC-GAL4	NOMPC:GFP	697.992	0.33924
w*;nompC[3],UAS-NompC::GFP/nompC[3];nompC-GAL4	NOMPC:GFP	703.379	0.34149
w*;nompC[3],UAS-NompC::GFP/nompC[3];nompC-GAL4	NOMPC:GFP	712.843	0.34543
w*;nompC[3],UAS-NompC::GFP/nompC[3];nompC-GAL4	NOMPC:GFP	727.694	0.35155
w*;nompC[3],UAS-NompC::GFP/nompC[3];nompC-GAL4	NOMPC:GFP	742.545	0.35762
w*;nompC[3],UAS-NompC::GFP/nompC[3];nompC-GAL4	NOMPC:GFP	757.396	0.36364
w*;nompC[3],UAS-NompC::GFP/nompC[3];nompC-GAL4	NOMPC:GFP	772.247	0.36959
w*;nompC[3],UAS-NompC::GFP/nompC[3];nompC-GAL4	NOMPC:GFP	787.098	0.37549
w*;nompC[3],UAS-NompC::GFP/nompC[3];nompC-GAL4	NOMPC:GFP	801.948	0.38134
w*;nompC[3],UAS-NompC::GFP/nompC[3];nompC-GAL4	NOMPC:GFP	816.799	0.38713
w*;nompC[3],UAS-NompC::GFP/nompC[3];nompC-GAL4	NOMPC:GFP	831.65	0.39286
w*;nompC[3],UAS-NompC::GFP/nompC[3];nompC-GAL4	NOMPC:GFP	846.501	0.39855
w*;nompC[3],UAS-NompC::GFP/nompC[3];nompC-GAL4	NOMPC:GFP	861.352	0.40418
w*;nompC[3],UAS-NompC::GFP/nompC[3];nompC-GAL4	NOMPC:GFP	876.203	0.40975
w*;nompC[3],UAS-NompC::GFP/nompC[3];nompC-GAL4	NOMPC:GFP	891.054	0.41528
w*;nompC[3],UAS-NompC::GFP/nompC[3];nompC-GAL4	NOMPC:GFP	905.905	0.42075
w*;nompC[3],UAS-NompC::GFP/nompC[3];nompC-GAL4	NOMPC:GFP	920.756	0.42617
w*;nompC[3],UAS-NompC::GFP/nompC[3];nompC-GAL4	NOMPC:GFP	935.607	0.43154
w*;nompC[3],UAS-NompC::GFP/nompC[3];nompC-GAL4	NOMPC:GFP	950.457	0.43686
w*;nompC[3],UAS-NompC::GFP/nompC[3];nompC-GAL4	NOMPC:GFP	965.308	0.44213
w*;nompC[3],UAS-NompC::GFP/nompC[3];nompC-GAL4	NOMPC:GFP	980.159	0.44736
w*;nompC[3],UAS-NompC::GFP/nompC[3];nompC-GAL4	NOMPC:GFP	995.01	0.45253
w*;nompC[3],UAS-NompC::GFP/nompC[3];nompC-GAL4	NOMPC:GFP	1009.86	0.45765
w*;nompC[3],UAS-NompC::GFP/nompC[3];nompC-GAL4	NOMPC:GFP	1024.71	0.46273
w*;nompC[3],UAS-NompC::GFP/nompC[3];nompC-GAL4	NOMPC:GFP	1039.56	0.46776
w*;nompC[3],UAS-NompC::GFP/nompC[3];nompC-GAL4	NOMPC:GFP	1054.41	0.47274
w*;nompC[3],UAS-NompC::GFP/nompC[3];nompC-GAL4	NOMPC:GFP	1069.26	0.47768
w*;nompC[3],UAS-NompC::GFP/nompC[3];nompC-GAL4	NOMPC:GFP	1084.12	0.48257
w*;nompC[3],UAS-NompC::GFP/nompC[3];nompC-GAL4	NOMPC:GFP	1098.97	0.48741
w*;nompC[3],UAS-NompC::GFP/nompC[3];nompC-GAL4	NOMPC:GFP	1110.15	0.49103
w*;nompC[3],UAS-NompC::GFP/nompC[3];nompC-GAL4	NOMPC:GFP	1113.82	0.49221
w*;nompC[3],UAS-NompC::GFP/nompC[3];nompC-GAL4	NOMPC:GFP	1127.57	0.49661
w*;nompC[3],UAS-NompC::GFP/nompC[3];nompC-GAL4	NOMPC:GFP	1128.67	0.49696
w*;nompC[3],UAS-NompC::GFP/nompC[3];nompC-GAL4	NOMPC:GFP	1143.52	0.50167
w*;nompC[3],UAS-NompC::GFP/nompC[3];nompC-GAL4	NOMPC:GFP	1158.37	0.50633
w*;nompC[3],UAS-NompC::GFP/nompC[3];nompC-GAL4	NOMPC:GFP	1173.22	0.51095
w*;nompC[3],UAS-NompC::GFP/nompC[3];nompC-GAL4	NOMPC:GFP	1188.07	0.51553
w*;nompC[3],UAS-NompC::GFP/nompC[3];nompC-GAL4	NOMPC:GFP	1202.92	0.52007
w*;nompC[3],UAS-NompC::GFP/nompC[3];nompC-GAL4	NOMPC:GFP	1217.77	0.52456
w*;nompC[3],UAS-NompC::GFP/nompC[3];nompC-GAL4	NOMPC:GFP	1220.69	0.52544
w*;nompC[3],UAS-NompC::GFP/nompC[3];nompC-GAL4	NOMPC:GFP	1232.62	0.52901
w*;nompC[3],UAS-NompC::GFP/nompC[3];nompC-GAL4	NOMPC:GFP	1247.48	0.53342
w*;nompC[3],UAS-NompC::GFP/nompC[3];nompC-GAL4	NOMPC:GFP	1262.33	0.53779
w*;nompC[3],UAS-NompC::GFP/nompC[3];nompC-GAL4	NOMPC:GFP	1271.18	0.54037
w*;nompC[3],UAS-NompC::GFP/nompC[3];nompC-GAL4	NOMPC:GFP	1277.18	0.54211
w*;nompC[3],UAS-NompC::GFP/nompC[3];nompC-GAL4	NOMPC:GFP	1289.01	0.54553
w*;nompC[3],UAS-NompC::GFP/nompC[3];nompC-GAL4	NOMPC:GFP	1292.03	0.5464
w*;nompC[3],UAS-NompC::GFP/nompC[3];nompC-GAL4	NOMPC:GFP	1306.88	0.55065
w*;nompC[3],UAS-NompC::GFP/nompC[3];nompC-GAL4	NOMPC:GFP	1313.88	0.55263
w*;nompC[3],UAS-NompC::GFP/nompC[3];nompC-GAL4	NOMPC:GFP	1321.73	0.55485
w*;nompC[3],UAS-NompC::GFP/nompC[3];nompC-GAL4	NOMPC:GFP	1336.58	0.55902
w*;nompC[3],UAS-NompC::GFP/nompC[3];nompC-GAL4	NOMPC:GFP	1351.43	0.56315
w*;nompC[3],UAS-NompC::GFP/nompC[3];nompC-GAL4	NOMPC:GFP	1366.28	0.56724
w*;nompC[3],UAS-NompC::GFP/nompC[3];nompC-GAL4	NOMPC:GFP	1381.13	0.57129
w*;nompC[3],UAS-NompC::GFP/nompC[3];nompC-GAL4	NOMPC:GFP	1395.98	0.5753
w*;nompC[3],UAS-NompC::GFP/nompC[3];nompC-GAL4	NOMPC:GFP	1410.84	0.57928
w*;nompC[3],UAS-NompC::GFP/nompC[3];nompC-GAL4	NOMPC:GFP	1425.69	0.58321
w*;nompC[3],UAS-NompC::GFP/nompC[3];nompC-GAL4	NOMPC:GFP	1440.54	0.58712
w*;nompC[3],UAS-NompC::GFP/nompC[3];nompC-GAL4	NOMPC:GFP	1455.39	0.59098
w*;nompC[3],UAS-NompC::GFP/nompC[3];nompC-GAL4	NOMPC:GFP	1470.24	0.59481
w*;nompC[3],UAS-NompC::GFP/nompC[3];nompC-GAL4	NOMPC:GFP	1485.09	0.5986
w*;nompC[3],UAS-NompC::GFP/nompC[3];nompC-GAL4	NOMPC:GFP	1499.94	0.60236
w*;nompC[3],UAS-NompC::GFP/nompC[3];nompC-GAL4	NOMPC:GFP	1514.79	0.60608
w*;nompC[3],UAS-NompC::GFP/nompC[3];nompC-GAL4	NOMPC:GFP	1529.64	0.60977
w*;nompC[3],UAS-NompC::GFP/nompC[3];nompC-GAL4	NOMPC:GFP	1544.49	0.61342
w*;nompC[3],UAS-NompC::GFP/nompC[3];nompC-GAL4	NOMPC:GFP	1559.34	0.61704
w*;nompC[3],UAS-NompC::GFP/nompC[3];nompC-GAL4	NOMPC:GFP	1574.2	0.62063
w*;nompC[3],UAS-NompC::GFP/nompC[3];nompC-GAL4	NOMPC:GFP	1581.4	0.62235
w*;nompC[3],UAS-NompC::GFP/nompC[3];nompC-GAL4	NOMPC:GFP	1589.05	0.62418
w*;nompC[3],UAS-NompC::GFP/nompC[3];nompC-GAL4	NOMPC:GFP	1603.9	0.6277
w*;nompC[3],UAS-NompC::GFP/nompC[3];nompC-GAL4	NOMPC:GFP	1612.02	0.62961
w*;nompC[3],UAS-NompC::GFP/nompC[3];nompC-GAL4	NOMPC:GFP	1618.75	0.63118
w*;nompC[3],UAS-NompC::GFP/nompC[3];nompC-GAL4	NOMPC:GFP	1633.6	0.63464
w*;nompC[3],UAS-NompC::GFP/nompC[3];nompC-GAL4	NOMPC:GFP	1648.45	0.63806
w*;nompC[3],UAS-NompC::GFP/nompC[3];nompC-GAL4	NOMPC:GFP	1663.3	0.64144
w*;nompC[3],UAS-NompC::GFP/nompC[3];nompC-GAL4	NOMPC:GFP	1678.15	0.6448
w*;nompC[3],UAS-NompC::GFP/nompC[3];nompC-GAL4	NOMPC:GFP	1693	0.64813
w*;nompC[3],UAS-NompC::GFP/nompC[3];nompC-GAL4	NOMPC:GFP	1707.85	0.65142
w*;nompC[3],UAS-NompC::GFP/nompC[3];nompC-GAL4	NOMPC:GFP	1717.11	0.65346
w*;nompC[3],UAS-NompC::GFP/nompC[3];nompC-GAL4	NOMPC:GFP	1722.7	0.65468
w*;nompC[3],UAS-NompC::GFP/nompC[3];nompC-GAL4	NOMPC:GFP	1737.55	0.65792
w*;nompC[3],UAS-NompC::GFP/nompC[3];nompC-GAL4	NOMPC:GFP	1752.41	0.66112
w*;nompC[3],UAS-NompC::GFP/nompC[3];nompC-GAL4	NOMPC:GFP	1767.26	0.66429
w*;nompC[3],UAS-NompC::GFP/nompC[3];nompC-GAL4	NOMPC:GFP	1782.11	0.66743
w*;nompC[3],UAS-NompC::GFP/nompC[3];nompC-GAL4	NOMPC:GFP	1796.96	0.67055
w*;nompC[3],UAS-NompC::GFP/nompC[3];nompC-GAL4	NOMPC:GFP	1802.01	0.6716
w*;nompC[3],UAS-NompC::GFP/nompC[3];nompC-GAL4	NOMPC:GFP	1811.81	0.67363
w*;nompC[3],UAS-NompC::GFP/nompC[3];nompC-GAL4	NOMPC:GFP	1826.66	0.67669
w*;nompC[3],UAS-NompC::GFP/nompC[3];nompC-GAL4	NOMPC:GFP	1841.51	0.67971
w*;nompC[3],UAS-NompC::GFP/nompC[3];nompC-GAL4	NOMPC:GFP	1842.62	0.67994
w*;nompC[3],UAS-NompC::GFP/nompC[3];nompC-GAL4	NOMPC:GFP	1854.3	0.6823
w*;nompC[3],UAS-NompC::GFP/nompC[3];nompC-GAL4	NOMPC:GFP	1856.36	0.68271
w*;nompC[3],UAS-NompC::GFP/nompC[3];nompC-GAL4	NOMPC:GFP	1871.21	0.68568
w*;nompC[3],UAS-NompC::GFP/nompC[3];nompC-GAL4	NOMPC:GFP	1886.06	0.68862
w*;nompC[3],UAS-NompC::GFP/nompC[3];nompC-GAL4	NOMPC:GFP	1900.91	0.69154
w*;nompC[3],UAS-NompC::GFP/nompC[3];nompC-GAL4	NOMPC:GFP	1915.77	0.69443
w*;nompC[3],UAS-NompC::GFP/nompC[3];nompC-GAL4	NOMPC:GFP	1930.62	0.69729
w*;nompC[3],UAS-NompC::GFP/nompC[3];nompC-GAL4	NOMPC:GFP	1945.47	0.70012
w*;nompC[3],UAS-NompC::GFP/nompC[3];nompC-GAL4	NOMPC:GFP	1960.32	0.70293
w*;nompC[3],UAS-NompC::GFP/nompC[3];nompC-GAL4	NOMPC:GFP	1975.17	0.70571
w*;nompC[3],UAS-NompC::GFP/nompC[3];nompC-GAL4	NOMPC:GFP	1990.02	0.70847
w*;nompC[3],UAS-NompC::GFP/nompC[3];nompC-GAL4	NOMPC:GFP	2004.87	0.71119
w*;nompC[3],UAS-NompC::GFP/nompC[3];nompC-GAL4	NOMPC:GFP	2019.72	0.7139
w*;nompC[3],UAS-NompC::GFP/nompC[3];nompC-GAL4	NOMPC:GFP	2021.85	0.71428
w*;nompC[3],UAS-NompC::GFP/nompC[3];nompC-GAL4	NOMPC:GFP	2034.57	0.71658
w*;nompC[3],UAS-NompC::GFP/nompC[3];nompC-GAL4	NOMPC:GFP	2049.42	0.71923
w*;nompC[3],UAS-NompC::GFP/nompC[3];nompC-GAL4	NOMPC:GFP	2053.21	0.7199
w*;nompC[3],UAS-NompC::GFP/nompC[3];nompC-GAL4	NOMPC:GFP	2064.27	0.72186
w*;nompC[3],UAS-NompC::GFP/nompC[3];nompC-GAL4	NOMPC:GFP	2079.13	0.72446
w*;nompC[3],UAS-NompC::GFP/nompC[3];nompC-GAL4	NOMPC:GFP	2093.98	0.72704
w*;nompC[3],UAS-NompC::GFP/nompC[3];nompC-GAL4	NOMPC:GFP	2108.83	0.7296
w*;nompC[3],UAS-NompC::GFP/nompC[3];nompC-GAL4	NOMPC:GFP	2123.68	0.73213
w*;nompC[3],UAS-NompC::GFP/nompC[3];nompC-GAL4	NOMPC:GFP	2138.53	0.73464
w*;nompC[3],UAS-NompC::GFP/nompC[3];nompC-GAL4	NOMPC:GFP	2153.38	0.73712
w*;nompC[3],UAS-NompC::GFP/nompC[3];nompC-GAL4	NOMPC:GFP	2168.23	0.73958
w*;nompC[3],UAS-NompC::GFP/nompC[3];nompC-GAL4	NOMPC:GFP	2183.08	0.74202
w*;nompC[3],UAS-NompC::GFP/nompC[3];nompC-GAL4	NOMPC:GFP	2197.93	0.74444
w*;nompC[3],UAS-NompC::GFP/nompC[3];nompC-GAL4	NOMPC:GFP	2212.78	0.74683
w*;nompC[3],UAS-NompC::GFP/nompC[3];nompC-GAL4	NOMPC:GFP	2227.63	0.7492
w*;nompC[3],UAS-NompC::GFP/nompC[3];nompC-GAL4	NOMPC:GFP	2237.93	0.75083
w*;nompC[3],UAS-NompC::GFP/nompC[3];nompC-GAL4	NOMPC:GFP	2242.49	0.75155
w*;nompC[3],UAS-NompC::GFP/nompC[3];nompC-GAL4	NOMPC:GFP	2257.34	0.75387
w*;nompC[3],UAS-NompC::GFP/nompC[3];nompC-GAL4	NOMPC:GFP	2272.19	0.75618
w*;nompC[3],UAS-NompC::GFP/nompC[3];nompC-GAL4	NOMPC:GFP	2277.15	0.75694
w*;nompC[3],UAS-NompC::GFP/nompC[3];nompC-GAL4	NOMPC:GFP	2287.04	0.75846
w*;nompC[3],UAS-NompC::GFP/nompC[3];nompC-GAL4	NOMPC:GFP	2301.89	0.76072
w*;nompC[3],UAS-NompC::GFP/nompC[3];nompC-GAL4	NOMPC:GFP	2316.74	0.76296
w*;nompC[3],UAS-NompC::GFP/nompC[3];nompC-GAL4	NOMPC:GFP	2331.59	0.76518
w*;nompC[3],UAS-NompC::GFP/nompC[3];nompC-GAL4	NOMPC:GFP	2344.65	0.76712
w*;nompC[3],UAS-NompC::GFP/nompC[3];nompC-GAL4	NOMPC:GFP	2346.44	0.76738
w*;nompC[3],UAS-NompC::GFP/nompC[3];nompC-GAL4	NOMPC:GFP	2347.35	0.76751
w*;nompC[3],UAS-NompC::GFP/nompC[3];nompC-GAL4	NOMPC:GFP	2361.29	0.76956
w*;nompC[3],UAS-NompC::GFP/nompC[3];nompC-GAL4	NOMPC:GFP	2376.14	0.77171
w*;nompC[3],UAS-NompC::GFP/nompC[3];nompC-GAL4	NOMPC:GFP	2390.99	0.77385
w*;nompC[3],UAS-NompC::GFP/nompC[3];nompC-GAL4	NOMPC:GFP	2405.85	0.77597
w*;nompC[3],UAS-NompC::GFP/nompC[3];nompC-GAL4	NOMPC:GFP	2420.7	0.77807
w*;nompC[3],UAS-NompC::GFP/nompC[3];nompC-GAL4	NOMPC:GFP	2435.55	0.78014
w*;nompC[3],UAS-NompC::GFP/nompC[3];nompC-GAL4	NOMPC:GFP	2439.97	0.78076
w*;nompC[3],UAS-NompC::GFP/nompC[3];nompC-GAL4	NOMPC:GFP	2447.54	0.78181
w*;nompC[3],UAS-NompC::GFP/nompC[3];nompC-GAL4	NOMPC:GFP	2450.4	0.7822
w*;nompC[3],UAS-NompC::GFP/nompC[3];nompC-GAL4	NOMPC:GFP	2465.25	0.78424
w*;nompC[3],UAS-NompC::GFP/nompC[3];nompC-GAL4	NOMPC:GFP	2480.1	0.78626
w*;nompC[3],UAS-NompC::GFP/nompC[3];nompC-GAL4	NOMPC:GFP	2494.95	0.78826
w*;nompC[3],UAS-NompC::GFP/nompC[3];nompC-GAL4	NOMPC:GFP	2509.8	0.79025
w*;nompC[3],UAS-NompC::GFP/nompC[3];nompC-GAL4	NOMPC:GFP	2524.65	0.79221
w*;nompC[3],UAS-NompC::GFP/nompC[3];nompC-GAL4	NOMPC:GFP	2539.5	0.79416
w*;nompC[3],UAS-NompC::GFP/nompC[3];nompC-GAL4	NOMPC:GFP	2554.35	0.79608
w*;nompC[3],UAS-NompC::GFP/nompC[3];nompC-GAL4	NOMPC:GFP	2569.21	0.79799
w*;nompC[3],UAS-NompC::GFP/nompC[3];nompC-GAL4	NOMPC:GFP	2584.06	0.79988
w*;nompC[3],UAS-NompC::GFP/nompC[3];nompC-GAL4	NOMPC:GFP	2598.91	0.80176
w*;nompC[3],UAS-NompC::GFP/nompC[3];nompC-GAL4	NOMPC:GFP	2613.76	0.80361
w*;nompC[3],UAS-NompC::GFP/nompC[3];nompC-GAL4	NOMPC:GFP	2628.61	0.80545
w*;nompC[3],UAS-NompC::GFP/nompC[3];nompC-GAL4	NOMPC:GFP	2643.46	0.80727
w*;nompC[3],UAS-NompC::GFP/nompC[3];nompC-GAL4	NOMPC:GFP	2658.31	0.80908
w*;nompC[3],UAS-NompC::GFP/nompC[3];nompC-GAL4	NOMPC:GFP	2673.16	0.81086
w*;nompC[3],UAS-NompC::GFP/nompC[3];nompC-GAL4	NOMPC:GFP	2688.01	0.81264
w*;nompC[3],UAS-NompC::GFP/nompC[3];nompC-GAL4	NOMPC:GFP	2702.86	0.81439
w*;nompC[3],UAS-NompC::GFP/nompC[3];nompC-GAL4	NOMPC:GFP	2710.41	0.81527
w*;nompC[3],UAS-NompC::GFP/nompC[3];nompC-GAL4	NOMPC:GFP	2717.71	0.81613
w*;nompC[3],UAS-NompC::GFP/nompC[3];nompC-GAL4	NOMPC:GFP	2732.57	0.81785
w*;nompC[3],UAS-NompC::GFP/nompC[3];nompC-GAL4	NOMPC:GFP	2746.95	0.8195
w*;nompC[3],UAS-NompC::GFP/nompC[3];nompC-GAL4	NOMPC:GFP	2747.42	0.81955
w*;nompC[3],UAS-NompC::GFP/nompC[3];nompC-GAL4	NOMPC:GFP	2762.27	0.82124
w*;nompC[3],UAS-NompC::GFP/nompC[3];nompC-GAL4	NOMPC:GFP	2777.12	0.82292
w*;nompC[3],UAS-NompC::GFP/nompC[3];nompC-GAL4	NOMPC:GFP	2791.97	0.82458
w*;nompC[3],UAS-NompC::GFP/nompC[3];nompC-GAL4	NOMPC:GFP	2801.73	0.82566
w*;nompC[3],UAS-NompC::GFP/nompC[3];nompC-GAL4	NOMPC:GFP	2806.82	0.82622
w*;nompC[3],UAS-NompC::GFP/nompC[3];nompC-GAL4	NOMPC:GFP	2821.67	0.82785
w*;nompC[3],UAS-NompC::GFP/nompC[3];nompC-GAL4	NOMPC:GFP	2831.73	0.82894
w*;nompC[3],UAS-NompC::GFP/nompC[3];nompC-GAL4	NOMPC:GFP	2834.53	0.82924
w*;nompC[3],UAS-NompC::GFP/nompC[3];nompC-GAL4	NOMPC:GFP	2836.52	0.82946
w*;nompC[3],UAS-NompC::GFP/nompC[3];nompC-GAL4	NOMPC:GFP	2851.37	0.83105
w*;nompC[3],UAS-NompC::GFP/nompC[3];nompC-GAL4	NOMPC:GFP	2853.12	0.83124
w*;nompC[3],UAS-NompC::GFP/nompC[3];nompC-GAL4	NOMPC:GFP	2866.22	0.83264
w*;nompC[3],UAS-NompC::GFP/nompC[3];nompC-GAL4	NOMPC:GFP	2881.07	0.8342
w*;nompC[3],UAS-NompC::GFP/nompC[3];nompC-GAL4	NOMPC:GFP	2895.92	0.83575
w*;nompC[3],UAS-NompC::GFP/nompC[3];nompC-GAL4	NOMPC:GFP	2910.78	0.83729
w*;nompC[3],UAS-NompC::GFP/nompC[3];nompC-GAL4	NOMPC:GFP	2925.63	0.83882
w*;nompC[3],UAS-NompC::GFP/nompC[3];nompC-GAL4	NOMPC:GFP	2940.48	0.84033
w*;nompC[3],UAS-NompC::GFP/nompC[3];nompC-GAL4	NOMPC:GFP	2955.33	0.84182
w*;nompC[3],UAS-NompC::GFP/nompC[3];nompC-GAL4	NOMPC:GFP	2970.18	0.8433
w*;nompC[3],UAS-NompC::GFP/nompC[3];nompC-GAL4	NOMPC:GFP	2985.03	0.84477
w*;nompC[3],UAS-NompC::GFP/nompC[3];nompC-GAL4	NOMPC:GFP	2999.88	0.84622
w*;nompC[3],UAS-NompC::GFP/nompC[3];nompC-GAL4	NOMPC:GFP	3014.73	0.84766
w*;nompC[3],UAS-NompC::GFP/nompC[3];nompC-GAL4	NOMPC:GFP	3029.58	0.84909
w*;nompC[3],UAS-NompC::GFP/nompC[3];nompC-GAL4	NOMPC:GFP	3044.43	0.8505
w*;nompC[3],UAS-NompC::GFP/nompC[3];nompC-GAL4	NOMPC:GFP	3059.28	0.8519
w*;nompC[3],UAS-NompC::GFP/nompC[3];nompC-GAL4	NOMPC:GFP	3074.14	0.85329
w*;nompC[3],UAS-NompC::GFP/nompC[3];nompC-GAL4	NOMPC:GFP	3088.99	0.85466
w*;nompC[3],UAS-NompC::GFP/nompC[3];nompC-GAL4	NOMPC:GFP	3102.15	0.85587
w*;nompC[3],UAS-NompC::GFP/nompC[3];nompC-GAL4	NOMPC:GFP	3103.84	0.85602
w*;nompC[3],UAS-NompC::GFP/nompC[3];nompC-GAL4	NOMPC:GFP	3118.69	0.85737
w*;nompC[3],UAS-NompC::GFP/nompC[3];nompC-GAL4	NOMPC:GFP	3133.54	0.85871
w*;nompC[3],UAS-NompC::GFP/nompC[3];nompC-GAL4	NOMPC:GFP	3148.39	0.86003
w*;nompC[3],UAS-NompC::GFP/nompC[3];nompC-GAL4	NOMPC:GFP	3163.24	0.86134
w*;nompC[3],UAS-NompC::GFP/nompC[3];nompC-GAL4	NOMPC:GFP	3178.09	0.86264
w*;nompC[3],UAS-NompC::GFP/nompC[3];nompC-GAL4	NOMPC:GFP	3191.33	0.86378
w*;nompC[3],UAS-NompC::GFP/nompC[3];nompC-GAL4	NOMPC:GFP	3192.94	0.86392
w*;nompC[3],UAS-NompC::GFP/nompC[3];nompC-GAL4	NOMPC:GFP	3207.79	0.8652
w*;nompC[3],UAS-NompC::GFP/nompC[3];nompC-GAL4	NOMPC:GFP	3222.64	0.86646
w*;nompC[3],UAS-NompC::GFP/nompC[3];nompC-GAL4	NOMPC:GFP	3237.5	0.86771
w*;nompC[3],UAS-NompC::GFP/nompC[3];nompC-GAL4	NOMPC:GFP	3250.91	0.86883
w*;nompC[3],UAS-NompC::GFP/nompC[3];nompC-GAL4	NOMPC:GFP	3252.35	0.86895
w*;nompC[3],UAS-NompC::GFP/nompC[3];nompC-GAL4	NOMPC:GFP	3266.88	0.87015
w*;nompC[3],UAS-NompC::GFP/nompC[3];nompC-GAL4	NOMPC:GFP	3267.2	0.87018
w*;nompC[3],UAS-NompC::GFP/nompC[3];nompC-GAL4	NOMPC:GFP	3282.05	0.87139
w*;nompC[3],UAS-NompC::GFP/nompC[3];nompC-GAL4	NOMPC:GFP	3296.9	0.8726
w*;nompC[3],UAS-NompC::GFP/nompC[3];nompC-GAL4	NOMPC:GFP	3311.75	0.87379
w*;nompC[3],UAS-NompC::GFP/nompC[3];nompC-GAL4	NOMPC:GFP	3326.6	0.87497
w*;nompC[3],UAS-NompC::GFP/nompC[3];nompC-GAL4	NOMPC:GFP	3341.45	0.87614
w*;nompC[3],UAS-NompC::GFP/nompC[3];nompC-GAL4	NOMPC:GFP	3356.3	0.8773
w*;nompC[3],UAS-NompC::GFP/nompC[3];nompC-GAL4	NOMPC:GFP	3371.15	0.87845
w*;nompC[3],UAS-NompC::GFP/nompC[3];nompC-GAL4	NOMPC:GFP	3386	0.87959
w*;nompC[3],UAS-NompC::GFP/nompC[3];nompC-GAL4	NOMPC:GFP	3400.86	0.88071
w*;nompC[3],UAS-NompC::GFP/nompC[3];nompC-GAL4	NOMPC:GFP	3415.71	0.88183
w*;nompC[3],UAS-NompC::GFP/nompC[3];nompC-GAL4	NOMPC:GFP	3430.56	0.88294
w*;nompC[3],UAS-NompC::GFP/nompC[3];nompC-GAL4	NOMPC:GFP	3445.41	0.88403
w*;nompC[3],UAS-NompC::GFP/nompC[3];nompC-GAL4	NOMPC:GFP	3460.26	0.88512
w*;nompC[3],UAS-NompC::GFP/nompC[3];nompC-GAL4	NOMPC:GFP	3475.11	0.8862
w*;nompC[3],UAS-NompC::GFP/nompC[3];nompC-GAL4	NOMPC:GFP	3489.96	0.88726
w*;nompC[3],UAS-NompC::GFP/nompC[3];nompC-GAL4	NOMPC:GFP	3504.81	0.88832
w*;nompC[3],UAS-NompC::GFP/nompC[3];nompC-GAL4	NOMPC:GFP	3519.66	0.88936
w*;nompC[3],UAS-NompC::GFP/nompC[3];nompC-GAL4	NOMPC:GFP	3534.51	0.8904
w*;nompC[3],UAS-NompC::GFP/nompC[3];nompC-GAL4	NOMPC:GFP	3549.36	0.89142
w*;nompC[3],UAS-NompC::GFP/nompC[3];nompC-GAL4	NOMPC:GFP	3564.22	0.89244
w*;nompC[3],UAS-NompC::GFP/nompC[3];nompC-GAL4	NOMPC:GFP	3579.07	0.89345
w*;nompC[3],UAS-NompC::GFP/nompC[3];nompC-GAL4	NOMPC:GFP	3593.92	0.89445
w*;nompC[3],UAS-NompC::GFP/nompC[3];nompC-GAL4	NOMPC:GFP	3608.77	0.89543
w*;nompC[3],UAS-NompC::GFP/nompC[3];nompC-GAL4	NOMPC:GFP	3623.62	0.89641
w*;nompC[3],UAS-NompC::GFP/nompC[3];nompC-GAL4	NOMPC:GFP	3638.47	0.89738
w*;nompC[3],UAS-NompC::GFP/nompC[3];nompC-GAL4	NOMPC:GFP	3653.32	0.89834
w*;nompC[3],UAS-NompC::GFP/nompC[3];nompC-GAL4	NOMPC:GFP	3668.17	0.8993
w*;nompC[3],UAS-NompC::GFP/nompC[3];nompC-GAL4	NOMPC:GFP	3683.02	0.90024
w*;nompC[3],UAS-NompC::GFP/nompC[3];nompC-GAL4	NOMPC:GFP	3697.87	0.90117
w*;nompC[3],UAS-NompC::GFP/nompC[3];nompC-GAL4	NOMPC:GFP	3712.72	0.9021
w*;nompC[3],UAS-NompC::GFP/nompC[3];nompC-GAL4	NOMPC:GFP	3727.58	0.90301
w*;nompC[3],UAS-NompC::GFP/nompC[3];nompC-GAL4	NOMPC:GFP	3742.43	0.90392
w*;nompC[3],UAS-NompC::GFP/nompC[3];nompC-GAL4	NOMPC:GFP	3757.28	0.90482
w*;nompC[3],UAS-NompC::GFP/nompC[3];nompC-GAL4	NOMPC:GFP	3772.13	0.90571
w*;nompC[3],UAS-NompC::GFP/nompC[3];nompC-GAL4	NOMPC:GFP	3786.98	0.9066
w*;nompC[3],UAS-NompC::GFP/nompC[3];nompC-GAL4	NOMPC:GFP	3801.83	0.90747
w*;nompC[3],UAS-NompC::GFP/nompC[3];nompC-GAL4	NOMPC:GFP	3816.68	0.90834
w*;nompC[3],UAS-NompC::GFP/nompC[3];nompC-GAL4	NOMPC:GFP	3831.53	0.9092
w*;nompC[3],UAS-NompC::GFP/nompC[3];nompC-GAL4	NOMPC:GFP	3846.38	0.91005
w*;nompC[3],UAS-NompC::GFP/nompC[3];nompC-GAL4	NOMPC:GFP	3861.23	0.91089
w*;nompC[3],UAS-NompC::GFP/nompC[3];nompC-GAL4	NOMPC:GFP	3876.08	0.91172
w*;nompC[3],UAS-NompC::GFP/nompC[3];nompC-GAL4	NOMPC:GFP	3890.94	0.91255
w*;nompC[3],UAS-NompC::GFP/nompC[3];nompC-GAL4	NOMPC:GFP	3905.79	0.91337
w*;nompC[3],UAS-NompC::GFP/nompC[3];nompC-GAL4	NOMPC:GFP	3907.68	0.91347
w*;nompC[3],UAS-NompC::GFP/nompC[3];nompC-GAL4	NOMPC:GFP	3920.64	0.91418
w*;nompC[3],UAS-NompC::GFP/nompC[3];nompC-GAL4	NOMPC:GFP	3928.9	0.91463
w*;nompC[3],UAS-NompC::GFP/nompC[3];nompC-GAL4	NOMPC:GFP	3935.49	0.91498
w*;nompC[3],UAS-NompC::GFP/nompC[3];nompC-GAL4	NOMPC:GFP	3950.34	0.91578
w*;nompC[3],UAS-NompC::GFP/nompC[3];nompC-GAL4	NOMPC:GFP	3965.19	0.91657
w*;nompC[3],UAS-NompC::GFP/nompC[3];nompC-GAL4	NOMPC:GFP	3980.04	0.91735
w*;nompC[3],UAS-NompC::GFP/nompC[3];nompC-GAL4	NOMPC:GFP	3994.89	0.91812
w*;nompC[3],UAS-NompC::GFP/nompC[3];nompC-GAL4	NOMPC:GFP	4009.74	0.91889
w*;nompC[3],UAS-NompC::GFP/nompC[3];nompC-GAL4	NOMPC:GFP	4024.59	0.91965
w*;nompC[3],UAS-NompC::GFP/nompC[3];nompC-GAL4	NOMPC:GFP	4039.44	0.9204
w*;nompC[3],UAS-NompC::GFP/nompC[3];nompC-GAL4	NOMPC:GFP	4054.29	0.92115
w*;nompC[3],UAS-NompC::GFP/nompC[3];nompC-GAL4	NOMPC:GFP	4069.15	0.92188
w*;nompC[3],UAS-NompC::GFP/nompC[3];nompC-GAL4	NOMPC:GFP	4084	0.92262
w*;nompC[3],UAS-NompC::GFP/nompC[3];nompC-GAL4	NOMPC:GFP	4098.85	0.92334
w*;nompC[3],UAS-NompC::GFP/nompC[3];nompC-GAL4	NOMPC:GFP	4113.7	0.92406
w*;nompC[3],UAS-NompC::GFP/nompC[3];nompC-GAL4	NOMPC:GFP	4128.55	0.92477
w*;nompC[3],UAS-NompC::GFP/nompC[3];nompC-GAL4	NOMPC:GFP	4143.4	0.92547
w*;nompC[3],UAS-NompC::GFP/nompC[3];nompC-GAL4	NOMPC:GFP	4158.25	0.92617
w*;nompC[3],UAS-NompC::GFP/nompC[3];nompC-GAL4	NOMPC:GFP	4173.1	0.92686
w*;nompC[3],UAS-NompC::GFP/nompC[3];nompC-GAL4	NOMPC:GFP	4187.95	0.92755
w*;nompC[3],UAS-NompC::GFP/nompC[3];nompC-GAL4	NOMPC:GFP	4202.8	0.92823
w*;nompC[3],UAS-NompC::GFP/nompC[3];nompC-GAL4	NOMPC:GFP	4217.65	0.9289
w*;nompC[3],UAS-NompC::GFP/nompC[3];nompC-GAL4	NOMPC:GFP	4232.51	0.92956
w*;nompC[3],UAS-NompC::GFP/nompC[3];nompC-GAL4	NOMPC:GFP	4247.36	0.93022
w*;nompC[3],UAS-NompC::GFP/nompC[3];nompC-GAL4	NOMPC:GFP	4262.21	0.93088
w*;nompC[3],UAS-NompC::GFP/nompC[3];nompC-GAL4	NOMPC:GFP	4269.51	0.9312
w*;nompC[3],UAS-NompC::GFP/nompC[3];nompC-GAL4	NOMPC:GFP	4277.06	0.93152
w*;nompC[3],UAS-NompC::GFP/nompC[3];nompC-GAL4	NOMPC:GFP	4291.91	0.93217
w*;nompC[3],UAS-NompC::GFP/nompC[3];nompC-GAL4	NOMPC:GFP	4306.76	0.9328
w*;nompC[3],UAS-NompC::GFP/nompC[3];nompC-GAL4	NOMPC:GFP	4321.61	0.93343
w*;nompC[3],UAS-NompC::GFP/nompC[3];nompC-GAL4	NOMPC:GFP	4336.46	0.93405
w*;nompC[3],UAS-NompC::GFP/nompC[3];nompC-GAL4	NOMPC:GFP	4351.31	0.93467
w*;nompC[3],UAS-NompC::GFP/nompC[3];nompC-GAL4	NOMPC:GFP	4356.57	0.93489
w*;nompC[3],UAS-NompC::GFP/nompC[3];nompC-GAL4	NOMPC:GFP	4366.16	0.93528
w*;nompC[3],UAS-NompC::GFP/nompC[3];nompC-GAL4	NOMPC:GFP	4381.01	0.93589
w*;nompC[3],UAS-NompC::GFP/nompC[3];nompC-GAL4	NOMPC:GFP	4395.87	0.93649
w*;nompC[3],UAS-NompC::GFP/nompC[3];nompC-GAL4	NOMPC:GFP	4410.72	0.93708
w*;nompC[3],UAS-NompC::GFP/nompC[3];nompC-GAL4	NOMPC:GFP	4425.57	0.93767
w*;nompC[3],UAS-NompC::GFP/nompC[3];nompC-GAL4	NOMPC:GFP	4433.42	0.93798
w*;nompC[3],UAS-NompC::GFP/nompC[3];nompC-GAL4	NOMPC:GFP	4440.42	0.93826
w*;nompC[3],UAS-NompC::GFP/nompC[3];nompC-GAL4	NOMPC:GFP	4455.27	0.93883
w*;nompC[3],UAS-NompC::GFP/nompC[3];nompC-GAL4	NOMPC:GFP	4470.12	0.93941
w*;nompC[3],UAS-NompC::GFP/nompC[3];nompC-GAL4	NOMPC:GFP	4484.97	0.93997
w*;nompC[3],UAS-NompC::GFP/nompC[3];nompC-GAL4	NOMPC:GFP	4499.82	0.94054
w*;nompC[3],UAS-NompC::GFP/nompC[3];nompC-GAL4	NOMPC:GFP	4514.67	0.94109
w*;nompC[3],UAS-NompC::GFP/nompC[3];nompC-GAL4	NOMPC:GFP	4523.37	0.94142
w*;nompC[3],UAS-NompC::GFP/nompC[3];nompC-GAL4	NOMPC:GFP	4529.52	0.94164
w*;nompC[3],UAS-NompC::GFP/nompC[3];nompC-GAL4	NOMPC:GFP	4544.37	0.94219
w*;nompC[3],UAS-NompC::GFP/nompC[3];nompC-GAL4	NOMPC:GFP	4559.23	0.94273
w*;nompC[3],UAS-NompC::GFP/nompC[3];nompC-GAL4	NOMPC:GFP	4574.08	0.94327
w*;nompC[3],UAS-NompC::GFP/nompC[3];nompC-GAL4	NOMPC:GFP	4588.93	0.9438
w*;nompC[3],UAS-NompC::GFP/nompC[3];nompC-GAL4	NOMPC:GFP	4603.78	0.94433
w*;nompC[3],UAS-NompC::GFP/nompC[3];nompC-GAL4	NOMPC:GFP	4618.63	0.94485
w*;nompC[3],UAS-NompC::GFP/nompC[3];nompC-GAL4	NOMPC:GFP	4633.48	0.94536
w*;nompC[3],UAS-NompC::GFP/nompC[3];nompC-GAL4	NOMPC:GFP	4648.33	0.94588
w*;nompC[3],UAS-NompC::GFP/nompC[3];nompC-GAL4	NOMPC:GFP	4663.18	0.94638
w*;nompC[3],UAS-NompC::GFP/nompC[3];nompC-GAL4	NOMPC:GFP	4678.03	0.94688
w*;nompC[3],UAS-NompC::GFP/nompC[3];nompC-GAL4	NOMPC:GFP	4692.88	0.94738
w*;nompC[3],UAS-NompC::GFP/nompC[3];nompC-GAL4	NOMPC:GFP	4707.73	0.94787
w*;nompC[3],UAS-NompC::GFP/nompC[3];nompC-GAL4	NOMPC:GFP	4722.59	0.94836
w*;nompC[3],UAS-NompC::GFP/nompC[3];nompC-GAL4	NOMPC:GFP	4737.44	0.94885
w*;nompC[3],UAS-NompC::GFP/nompC[3];nompC-GAL4	NOMPC:GFP	4752.29	0.94932
w*;nompC[3],UAS-NompC::GFP/nompC[3];nompC-GAL4	NOMPC:GFP	4767.14	0.9498
w*;nompC[3],UAS-NompC::GFP/nompC[3];nompC-GAL4	NOMPC:GFP	4781.99	0.95027
w*;nompC[3],UAS-NompC::GFP/nompC[3];nompC-GAL4	NOMPC:GFP	4796.84	0.95073
w*;nompC[3],UAS-NompC::GFP/nompC[3];nompC-GAL4	NOMPC:GFP	4811.69	0.9512
w*;nompC[3],UAS-NompC::GFP/nompC[3];nompC-GAL4	NOMPC:GFP	4826.54	0.95165
w*;nompC[3],UAS-NompC::GFP/nompC[3];nompC-GAL4	NOMPC:GFP	4841.39	0.95211
w*;nompC[3],UAS-NompC::GFP/nompC[3];nompC-GAL4	NOMPC:GFP	4856.24	0.95255
w*;nompC[3],UAS-NompC::GFP/nompC[3];nompC-GAL4	NOMPC:GFP	4871.09	0.953
w*;nompC[3],UAS-NompC::GFP/nompC[3];nompC-GAL4	NOMPC:GFP	4885.95	0.95344
w*;nompC[3],UAS-NompC::GFP/nompC[3];nompC-GAL4	NOMPC:GFP	4900.8	0.95387
w*;nompC[3],UAS-NompC::GFP/nompC[3];nompC-GAL4	NOMPC:GFP	4915.65	0.95431
w*;nompC[3],UAS-NompC::GFP/nompC[3];nompC-GAL4	NOMPC:GFP	4930.5	0.95473
w*;nompC[3],UAS-NompC::GFP/nompC[3];nompC-GAL4	NOMPC:GFP	4945.35	0.95516
w*;nompC[3],UAS-NompC::GFP/nompC[3];nompC-GAL4	NOMPC:GFP	4960.2	0.95558
w*;nompC[3],UAS-NompC::GFP/nompC[3];nompC-GAL4	NOMPC:GFP	4975.05	0.95599
w*;nompC[3],UAS-NompC::GFP/nompC[3];nompC-GAL4	NOMPC:GFP	4989.9	0.95641
w*;nompC[3],UAS-NompC::GFP/nompC[3];nompC-GAL4	NOMPC:GFP	5004.75	0.95681
w*;nompC[3],UAS-NompC::GFP/nompC[3];nompC-GAL4	NOMPC:GFP	5019.6	0.95722
w*;nompC[3],UAS-NompC::GFP/nompC[3];nompC-GAL4	NOMPC:GFP	5034.45	0.95762
w*;nompC[3],UAS-NompC::GFP/nompC[3];nompC-GAL4	NOMPC:GFP	5049.31	0.95802
w*;nompC[3],UAS-NompC::GFP/nompC[3];nompC-GAL4	NOMPC:GFP	5064.16	0.95841
w*;nompC[3],UAS-NompC::GFP/nompC[3];nompC-GAL4	NOMPC:GFP	5079.01	0.9588
w*;nompC[3],UAS-NompC::GFP/nompC[3];nompC-GAL4	NOMPC:GFP	5093.86	0.95918
w*;nompC[3],UAS-NompC::GFP/nompC[3];nompC-GAL4	NOMPC:GFP	5108.71	0.95957
w*;nompC[3],UAS-NompC::GFP/nompC[3];nompC-GAL4	NOMPC:GFP	5123.56	0.95995
w*;nompC[3],UAS-NompC::GFP/nompC[3];nompC-GAL4	NOMPC:GFP	5138.41	0.96032
w*;nompC[3],UAS-NompC::GFP/nompC[3];nompC-GAL4	NOMPC:GFP	5153.26	0.96069
w*;nompC[3],UAS-NompC::GFP/nompC[3];nompC-GAL4	NOMPC:GFP	5168.11	0.96106
w*;nompC[3],UAS-NompC::GFP/nompC[3];nompC-GAL4	NOMPC:GFP	5182.96	0.96142
w*;nompC[3],UAS-NompC::GFP/nompC[3];nompC-GAL4	NOMPC:GFP	5197.81	0.96179
w*;nompC[3],UAS-NompC::GFP/nompC[3];nompC-GAL4	NOMPC:GFP	5212.66	0.96214
w*;nompC[3],UAS-NompC::GFP/nompC[3];nompC-GAL4	NOMPC:GFP	5227.52	0.9625
w*;nompC[3],UAS-NompC::GFP/nompC[3];nompC-GAL4	NOMPC:GFP	5242.37	0.96285
w*;nompC[3],UAS-NompC::GFP/nompC[3];nompC-GAL4	NOMPC:GFP	5257.22	0.9632
w*;nompC[3],UAS-NompC::GFP/nompC[3];nompC-GAL4	NOMPC:GFP	5272.07	0.96354
w*;nompC[3],UAS-NompC::GFP/nompC[3];nompC-GAL4	NOMPC:GFP	5286.92	0.96388
w*;nompC[3],UAS-NompC::GFP/nompC[3];nompC-GAL4	NOMPC:GFP	5301.77	0.96422
w*;nompC[3],UAS-NompC::GFP/nompC[3];nompC-GAL4	NOMPC:GFP	5316.62	0.96456
w*;nompC[3],UAS-NompC::GFP/nompC[3];nompC-GAL4	NOMPC:GFP	5331.47	0.96489
w*;nompC[3],UAS-NompC::GFP/nompC[3];nompC-GAL4	NOMPC:GFP	5346.32	0.96522
w*;nompC[3],UAS-NompC::GFP/nompC[3];nompC-GAL4	NOMPC:GFP	5361.17	0.96554
w*;nompC[3],UAS-NompC::GFP/nompC[3];nompC-GAL4	NOMPC:GFP	5376.02	0.96587
w*;nompC[3],UAS-NompC::GFP/nompC[3];nompC-GAL4	NOMPC:GFP	5390.88	0.96619
w*;nompC[3],UAS-NompC::GFP/nompC[3];nompC-GAL4	NOMPC:GFP	5405.73	0.9665
w*;nompC[3],UAS-NompC::GFP/nompC[3];nompC-GAL4	NOMPC:GFP	5420.58	0.96682
w*;nompC[3],UAS-NompC::GFP/nompC[3];nompC-GAL4	NOMPC:GFP	5435.43	0.96713
w*;nompC[3],UAS-NompC::GFP/nompC[3];nompC-GAL4	NOMPC:GFP	5450.28	0.96743
w*;nompC[3],UAS-NompC::GFP/nompC[3];nompC-GAL4	NOMPC:GFP	5465.13	0.96774
w*;nompC[3],UAS-NompC::GFP/nompC[3];nompC-GAL4	NOMPC:GFP	5479.98	0.96804
w*;nompC[3],UAS-NompC::GFP/nompC[3];nompC-GAL4	NOMPC:GFP	5494.83	0.96834
w*;nompC[3],UAS-NompC::GFP/nompC[3];nompC-GAL4	NOMPC:GFP	5509.68	0.96864
w*;nompC[3],UAS-NompC::GFP/nompC[3];nompC-GAL4	NOMPC:GFP	5524.53	0.96893
w*;nompC[3],UAS-NompC::GFP/nompC[3];nompC-GAL4	NOMPC:GFP	5539.38	0.96922
w*;nompC[3],UAS-NompC::GFP/nompC[3];nompC-GAL4	NOMPC:GFP	5554.24	0.96951
w*;nompC[3],UAS-NompC::GFP/nompC[3];nompC-GAL4	NOMPC:GFP	5569.09	0.96979
w*;nompC[3],UAS-NompC::GFP/nompC[3];nompC-GAL4	NOMPC:GFP	5583.94	0.97008
w*;nompC[3],UAS-NompC::GFP/nompC[3];nompC-GAL4	NOMPC:GFP	5598.79	0.97036
w*;nompC[3],UAS-NompC::GFP/nompC[3];nompC-GAL4	NOMPC:GFP	5613.64	0.97064
w*;nompC[3],UAS-NompC::GFP/nompC[3];nompC-GAL4	NOMPC:GFP	5628.49	0.97091
w*;nompC[3],UAS-NompC::GFP/nompC[3];nompC-GAL4	NOMPC:GFP	5643.34	0.97118
w*;nompC[3],UAS-NompC::GFP/nompC[3];nompC-GAL4	NOMPC:GFP	5658.19	0.97145
w*;nompC[3],UAS-NompC::GFP/nompC[3];nompC-GAL4	NOMPC:GFP	5673.04	0.97172
w*;nompC[3],UAS-NompC::GFP/nompC[3];nompC-GAL4	NOMPC:GFP	5687.89	0.97198
w*;nompC[3],UAS-NompC::GFP/nompC[3];nompC-GAL4	NOMPC:GFP	5702.74	0.97225
w*;nompC[3],UAS-NompC::GFP/nompC[3];nompC-GAL4	NOMPC:GFP	5717.6	0.97251
w*;nompC[3],UAS-NompC::GFP/nompC[3];nompC-GAL4	NOMPC:GFP	5732.45	0.97276
w*;nompC[3],UAS-NompC::GFP/nompC[3];nompC-GAL4	NOMPC:GFP	5747.3	0.97302
w*;nompC[3],UAS-NompC::GFP/nompC[3];nompC-GAL4	NOMPC:GFP	5762.15	0.97327
w*;nompC[3],UAS-NompC::GFP/nompC[3];nompC-GAL4	NOMPC:GFP	5777	0.97352
w*;nompC[3],UAS-NompC::GFP/nompC[3];nompC-GAL4	NOMPC:GFP	5791.85	0.97377
w*;nompC[3],UAS-NompC::GFP/nompC[3];nompC-GAL4	NOMPC:GFP	5806.7	0.97402
w*;nompC[3],UAS-NompC::GFP/nompC[3];nompC-GAL4	NOMPC:GFP	5821.55	0.97426
w*;nompC[3],UAS-NompC::GFP/nompC[3];nompC-GAL4	NOMPC:GFP	5836.4	0.9745
w*;nompC[3],UAS-NompC::GFP/nompC[3];nompC-GAL4	NOMPC:GFP	5851.25	0.97474
w*;nompC[3],UAS-NompC::GFP/nompC[3];nompC-GAL4	NOMPC:GFP	5866.1	0.97498
w*;nompC[3],UAS-NompC::GFP/nompC[3];nompC-GAL4	NOMPC:GFP	5880.96	0.97521
w*;nompC[3],UAS-NompC::GFP/nompC[3];nompC-GAL4	NOMPC:GFP	5895.81	0.97544
w*;nompC[3],UAS-NompC::GFP/nompC[3];nompC-GAL4	NOMPC:GFP	5910.66	0.97567
w*;nompC[3],UAS-NompC::GFP/nompC[3];nompC-GAL4	NOMPC:GFP	5925.51	0.9759
w*;nompC[3],UAS-NompC::GFP/nompC[3];nompC-GAL4	NOMPC:GFP	5940.36	0.97613
w*;nompC[3],UAS-NompC::GFP/nompC[3];nompC-GAL4	NOMPC:GFP	5955.21	0.97635
w*;nompC[3],UAS-NompC::GFP/nompC[3];nompC-GAL4	NOMPC:GFP	5970.06	0.97657
w*;nompC[3],UAS-NompC::GFP/nompC[3];nompC-GAL4	NOMPC:GFP	5984.91	0.97679
w*;nompC[3],UAS-NompC::GFP/nompC[3];nompC-GAL4	NOMPC:GFP	5999.76	0.97701
w*;nompC[3],UAS-NompC::GFP/nompC[3];nompC-GAL4	NOMPC:GFP	6014.61	0.97722
w*;nompC[3],UAS-NompC::GFP/nompC[3];nompC-GAL4	NOMPC:GFP	6029.46	0.97744
w*;nompC[3],UAS-NompC::GFP/nompC[3];nompC-GAL4	NOMPC:GFP	6044.32	0.97765
w*;nompC[3],UAS-NompC::GFP/nompC[3];nompC-GAL4	NOMPC:GFP	6059.17	0.97786
w*;nompC[3],UAS-NompC::GFP/nompC[3];nompC-GAL4	NOMPC:GFP	6074.02	0.97806
w*;nompC[3],UAS-NompC::GFP/nompC[3];nompC-GAL4	NOMPC:GFP	6088.87	0.97827
w*;nompC[3],UAS-NompC::GFP/nompC[3];nompC-GAL4	NOMPC:GFP	6103.72	0.97847
w*;nompC[3],UAS-NompC::GFP/nompC[3];nompC-GAL4	NOMPC:GFP	6118.57	0.97867
w*;nompC[3],UAS-NompC::GFP/nompC[3];nompC-GAL4	NOMPC:GFP	6133.42	0.97887
w*;nompC[3],UAS-NompC::GFP/nompC[3];nompC-GAL4	NOMPC:GFP	6148.27	0.97907
w*;nompC[3],UAS-NompC::GFP/nompC[3];nompC-GAL4	NOMPC:GFP	6163.12	0.97927
w*;nompC[3],UAS-NompC::GFP/nompC[3];nompC-GAL4	NOMPC:GFP	6177.97	0.97946
w*;nompC[3],UAS-NompC::GFP/nompC[3];nompC-GAL4	NOMPC:GFP	6192.82	0.97965
w*;nompC[3],UAS-NompC::GFP/nompC[3];nompC-GAL4	NOMPC:GFP	6207.68	0.97984
w*;nompC[3],UAS-NompC::GFP/nompC[3];nompC-GAL4	NOMPC:GFP	6222.53	0.98003
w*;nompC[3],UAS-NompC::GFP/nompC[3];nompC-GAL4	NOMPC:GFP	6237.38	0.98022
w*;nompC[3],UAS-NompC::GFP/nompC[3];nompC-GAL4	NOMPC:GFP	6252.23	0.98041
w*;nompC[3],UAS-NompC::GFP/nompC[3];nompC-GAL4	NOMPC:GFP	6267.08	0.98059
w*;nompC[3],UAS-NompC::GFP/nompC[3];nompC-GAL4	NOMPC:GFP	6281.93	0.98077
w*;nompC[3],UAS-NompC::GFP/nompC[3];nompC-GAL4	NOMPC:GFP	6296.78	0.98095
w*;nompC[3],UAS-NompC::GFP/nompC[3];nompC-GAL4	NOMPC:GFP	6311.63	0.98113
w*;nompC[3],UAS-NompC::GFP/nompC[3];nompC-GAL4	NOMPC:GFP	6326.48	0.98131
w*;nompC[3],UAS-NompC::GFP/nompC[3];nompC-GAL4	NOMPC:GFP	6341.33	0.98148
w*;nompC[3],UAS-NompC::GFP/nompC[3];nompC-GAL4	NOMPC:GFP	6356.18	0.98165
w*;nompC[3],UAS-NompC::GFP/nompC[3];nompC-GAL4	NOMPC:GFP	6371.03	0.98183
w*;nompC[3],UAS-NompC::GFP/nompC[3];nompC-GAL4	NOMPC:GFP	6385.89	0.982
w*;nompC[3],UAS-NompC::GFP/nompC[3];nompC-GAL4	NOMPC:GFP	6400.74	0.98216
w*;nompC[3],UAS-NompC::GFP/nompC[3];nompC-GAL4	NOMPC:GFP	6415.59	0.98233
w*;nompC[3],UAS-NompC::GFP/nompC[3];nompC-GAL4	NOMPC:GFP	6430.44	0.9825
w*;nompC[3],UAS-NompC::GFP/nompC[3];nompC-GAL4	NOMPC:GFP	6445.29	0.98266
w*;nompC[3],UAS-NompC::GFP/nompC[3];nompC-GAL4	NOMPC:GFP	6460.14	0.98282
w*;nompC[3],UAS-NompC::GFP/nompC[3];nompC-GAL4	NOMPC:GFP	6474.99	0.98298
w*;nompC[3],UAS-NompC::GFP/nompC[3];nompC-GAL4	NOMPC:GFP	6489.84	0.98314
w*;nompC[3],UAS-NompC::GFP/nompC[3];nompC-GAL4	NOMPC:GFP	6504.69	0.9833
w*;nompC[3],UAS-NompC::GFP/nompC[3];nompC-GAL4	NOMPC:GFP	6519.54	0.98346
w*;nompC[3],UAS-NompC::GFP/nompC[3];nompC-GAL4	NOMPC:GFP	6534.39	0.98361
w*;nompC[3],UAS-NompC::GFP/nompC[3];nompC-GAL4	NOMPC:GFP	6549.25	0.98377
w*;nompC[3],UAS-NompC::GFP/nompC[3];nompC-GAL4	NOMPC:GFP	6564.1	0.98392
w*;nompC[3],UAS-NompC::GFP/nompC[3];nompC-GAL4	NOMPC:GFP	6578.95	0.98407
w*;nompC[3],UAS-NompC::GFP/nompC[3];nompC-GAL4	NOMPC:GFP	6593.8	0.98422
w*;nompC[3],UAS-NompC::GFP/nompC[3];nompC-GAL4	NOMPC:GFP	6608.65	0.98437
w*;nompC[3],UAS-NompC::GFP/nompC[3];nompC-GAL4	NOMPC:GFP	6623.5	0.98451
w*;nompC[3],UAS-NompC::GFP/nompC[3];nompC-GAL4	NOMPC:GFP	6638.35	0.98466
w*;nompC[3],UAS-NompC::GFP/nompC[3];nompC-GAL4	NOMPC:GFP	6653.2	0.9848
w*;nompC[3],UAS-NompC::GFP/nompC[3];nompC-GAL4	NOMPC:GFP	6668.05	0.98494
w*;nompC[3],UAS-NompC::GFP/nompC[3];nompC-GAL4	NOMPC:GFP	6682.9	0.98508
w*;nompC[3],UAS-NompC::GFP/nompC[3];nompC-GAL4	NOMPC:GFP	6697.75	0.98522
w*;nompC[3],UAS-NompC::GFP/nompC[3];nompC-GAL4	NOMPC:GFP	6712.61	0.98536
w*;nompC[3],UAS-NompC::GFP/nompC[3];nompC-GAL4	NOMPC:GFP	6727.46	0.9855
w*;nompC[3],UAS-NompC::GFP/nompC[3];nompC-GAL4	NOMPC:GFP	6742.31	0.98564
w*;nompC[3],UAS-NompC::GFP/nompC[3];nompC-GAL4	NOMPC:GFP	6757.16	0.98577
w*;nompC[3],UAS-NompC::GFP/nompC[3];nompC-GAL4	NOMPC:GFP	6772.01	0.9859
w*;nompC[3],UAS-NompC::GFP/nompC[3];nompC-GAL4	NOMPC:GFP	6786.86	0.98603
w*;nompC[3],UAS-NompC::GFP/nompC[3];nompC-GAL4	NOMPC:GFP	6801.71	0.98617
w*;nompC[3],UAS-NompC::GFP/nompC[3];nompC-GAL4	NOMPC:GFP	6813.09	0.98627
w*;nompC[3],UAS-NompC::GFP/nompC[3];nompC-GAL4	NOMPC:GFP	6816.56	0.9863
w*;nompC[3],UAS-NompC::GFP/nompC[3];nompC-GAL4	NOMPC:GFP	6831.41	0.98642
w*;nompC[3],UAS-NompC::GFP/nompC[3];nompC-GAL4	NOMPC:GFP	6846.26	0.98655
w*;nompC[3],UAS-NompC::GFP/nompC[3];nompC-GAL4	NOMPC:GFP	6861.11	0.98668
w*;nompC[3],UAS-NompC::GFP/nompC[3];nompC-GAL4	NOMPC:GFP	6875.97	0.9868
w*;nompC[3],UAS-NompC::GFP/nompC[3];nompC-GAL4	NOMPC:GFP	6890.82	0.98692
w*;nompC[3],UAS-NompC::GFP/nompC[3];nompC-GAL4	NOMPC:GFP	6905.67	0.98705
w*;nompC[3],UAS-NompC::GFP/nompC[3];nompC-GAL4	NOMPC:GFP	6920.52	0.98717
w*;nompC[3],UAS-NompC::GFP/nompC[3];nompC-GAL4	NOMPC:GFP	6935.37	0.98729
w*;nompC[3],UAS-NompC::GFP/nompC[3];nompC-GAL4	NOMPC:GFP	6950.22	0.98741
w*;nompC[3],UAS-NompC::GFP/nompC[3];nompC-GAL4	NOMPC:GFP	6965.07	0.98753
w*;nompC[3],UAS-NompC::GFP/nompC[3];nompC-GAL4	NOMPC:GFP	6979.92	0.98764
w*;nompC[3],UAS-NompC::GFP/nompC[3];nompC-GAL4	NOMPC:GFP	6994.77	0.98776
w*;nompC[3],UAS-NompC::GFP/nompC[3];nompC-GAL4	NOMPC:GFP	7009.62	0.98787
w*;nompC[3],UAS-NompC::GFP/nompC[3];nompC-GAL4	NOMPC:GFP	7014.39	0.98791
w*;nompC[3],UAS-NompC::GFP/nompC[3];nompC-GAL4	NOMPC:GFP	7024.47	0.98799
w*;nompC[3],UAS-NompC::GFP/nompC[3];nompC-GAL4	NOMPC:GFP	7039.33	0.9881
w*;nompC[3],UAS-NompC::GFP/nompC[3];nompC-GAL4	NOMPC:GFP	7054.18	0.98821
w*;nompC[3],UAS-NompC::GFP/nompC[3];nompC-GAL4	NOMPC:GFP	7069.03	0.98832
w*;nompC[3],UAS-NompC::GFP/nompC[3];nompC-GAL4	NOMPC:GFP	7083.88	0.98843
w*;nompC[3],UAS-NompC::GFP/nompC[3];nompC-GAL4	NOMPC:GFP	7098.73	0.98854
w*;nompC[3],UAS-NompC::GFP/nompC[3];nompC-GAL4	NOMPC:GFP	7113.58	0.98865
w*;nompC[3],UAS-NompC::GFP/nompC[3];nompC-GAL4	NOMPC:GFP	7128.43	0.98875
w*;nompC[3],UAS-NompC::GFP/nompC[3];nompC-GAL4	NOMPC:GFP	7143.28	0.98886
w*;nompC[3],UAS-NompC::GFP/nompC[3];nompC-GAL4	NOMPC:GFP	7158.13	0.98896
w*;nompC[3],UAS-NompC::GFP/nompC[3];nompC-GAL4	NOMPC:GFP	7172.98	0.98907
w*;nompC[3],UAS-NompC::GFP/nompC[3];nompC-GAL4	NOMPC:GFP	7187.83	0.98917
w*;nompC[3],UAS-NompC::GFP/nompC[3];nompC-GAL4	NOMPC:GFP	7202.69	0.98927
w*;nompC[3],UAS-NompC::GFP/nompC[3];nompC-GAL4	NOMPC:GFP	7217.54	0.98937
w*;nompC[3],UAS-NompC::GFP/nompC[3];nompC-GAL4	NOMPC:GFP	7232.39	0.98947
w*;nompC[3],UAS-NompC::GFP/nompC[3];nompC-GAL4	NOMPC:GFP	7247.24	0.98957
w*;nompC[3],UAS-NompC::GFP/nompC[3];nompC-GAL4	NOMPC:GFP	7262.09	0.98967
w*;nompC[3],UAS-NompC::GFP/nompC[3];nompC-GAL4	NOMPC:GFP	7276.94	0.98976
w*;nompC[3],UAS-NompC::GFP/nompC[3];nompC-GAL4	NOMPC:GFP	7291.79	0.98986
w*;nompC[3],UAS-NompC::GFP/nompC[3];nompC-GAL4	NOMPC:GFP	7306.64	0.98995
w*;nompC[3],UAS-NompC::GFP/nompC[3];nompC-GAL4	NOMPC:GFP	7321.49	0.99005
w*;nompC[3],UAS-NompC::GFP/nompC[3];nompC-GAL4	NOMPC:GFP	7336.34	0.99014
w*;nompC[3],UAS-NompC::GFP/nompC[3];nompC-GAL4	NOMPC:GFP	7351.19	0.99023
w*;nompC[3],UAS-NompC::GFP/nompC[3];nompC-GAL4	NOMPC:GFP	7366.05	0.99032
w*;nompC[3],UAS-NompC::GFP/nompC[3];nompC-GAL4	NOMPC:GFP	7380.9	0.99041
w*;nompC[3],UAS-NompC::GFP/nompC[3];nompC-GAL4	NOMPC:GFP	7395.75	0.9905
w*;nompC[3],UAS-NompC::GFP/nompC[3];nompC-GAL4	NOMPC:GFP	7410.6	0.99059
w*;nompC[3],UAS-NompC::GFP/nompC[3];nompC-GAL4	NOMPC:GFP	7425.45	0.99068
w*;nompC[3],UAS-NompC::GFP/nompC[3];nompC-GAL4	NOMPC:GFP	7440.3	0.99077
w*;nompC[3],UAS-NompC::GFP/nompC[3];nompC-GAL4	NOMPC:GFP	7455.15	0.99086
w*;nompC[3],UAS-NompC::GFP/nompC[3];nompC-GAL4	NOMPC:GFP	7470	0.99094
w*;nompC[3],UAS-NompC::GFP/nompC[3];nompC-GAL4	NOMPC:GFP	7484.85	0.99103
w*;nompC[3],UAS-NompC::GFP/nompC[3];nompC-GAL4	NOMPC:GFP	7499.7	0.99111
w*;nompC[3],UAS-NompC::GFP/nompC[3];nompC-GAL4	NOMPC:GFP	7514.55	0.99119
w*;nompC[3],UAS-NompC::GFP/nompC[3];nompC-GAL4	NOMPC:GFP	7524.68	0.99125
w*;nompC[3],UAS-NompC::GFP/nompC[3];nompC-GAL4	NOMPC:GFP	7529.4	0.99128
w*;nompC[3],UAS-NompC::GFP/nompC[3];nompC-GAL4	NOMPC:GFP	7544.26	0.99136
w*;nompC[3],UAS-NompC::GFP/nompC[3];nompC-GAL4	NOMPC:GFP	7557.77	0.99143
w*;nompC[3],UAS-NompC::GFP/nompC[3];nompC-GAL4	NOMPC:GFP	7559.11	0.99144
w*;nompC[3],UAS-NompC::GFP/nompC[3];nompC-GAL4	NOMPC:GFP	7573.96	0.99152
w*;nompC[3],UAS-NompC::GFP/nompC[3];nompC-GAL4	NOMPC:GFP	7588.81	0.9916
w*;nompC[3],UAS-NompC::GFP/nompC[3];nompC-GAL4	NOMPC:GFP	7603.66	0.99168
w*;nompC[3],UAS-NompC::GFP/nompC[3];nompC-GAL4	NOMPC:GFP	7618.51	0.99175
w*;nompC[3],UAS-NompC::GFP/nompC[3];nompC-GAL4	NOMPC:GFP	7633.36	0.99183
w*;nompC[3],UAS-NompC::GFP/nompC[3];nompC-GAL4	NOMPC:GFP	7648.21	0.99191
w*;nompC[3],UAS-NompC::GFP/nompC[3];nompC-GAL4	NOMPC:GFP	7651.21	0.99192
w*;nompC[3],UAS-NompC::GFP/nompC[3];nompC-GAL4	NOMPC:GFP	7663.06	0.99198
w*;nompC[3],UAS-NompC::GFP/nompC[3];nompC-GAL4	NOMPC:GFP	7677.91	0.99206
w*;nompC[3],UAS-NompC::GFP/nompC[3];nompC-GAL4	NOMPC:GFP	7692.76	0.99213
w*;nompC[3],UAS-NompC::GFP/nompC[3];nompC-GAL4	NOMPC:GFP	7707.62	0.99221
w*;nompC[3],UAS-NompC::GFP/nompC[3];nompC-GAL4	NOMPC:GFP	7722.47	0.99228
w*;nompC[3],UAS-NompC::GFP/nompC[3];nompC-GAL4	NOMPC:GFP	7737.32	0.99235
w*;nompC[3],UAS-NompC::GFP/nompC[3];nompC-GAL4	NOMPC:GFP	7752.17	0.99242
w*;nompC[3],UAS-NompC::GFP/nompC[3];nompC-GAL4	NOMPC:GFP	7767.02	0.99249
w*;nompC[3],UAS-NompC::GFP/nompC[3];nompC-GAL4	NOMPC:GFP	7781.87	0.99256
w*;nompC[3],UAS-NompC::GFP/nompC[3];nompC-GAL4	NOMPC:GFP	7796.72	0.99263
w*;nompC[3],UAS-NompC::GFP/nompC[3];nompC-GAL4	NOMPC:GFP	7811.57	0.9927
w*;nompC[3],UAS-NompC::GFP/nompC[3];nompC-GAL4	NOMPC:GFP	7826.42	0.99277
w*;nompC[3],UAS-NompC::GFP/nompC[3];nompC-GAL4	NOMPC:GFP	7841.27	0.99284
w*;nompC[3],UAS-NompC::GFP/nompC[3];nompC-GAL4	NOMPC:GFP	7856.12	0.99291
w*;nompC[3],UAS-NompC::GFP/nompC[3];nompC-GAL4	NOMPC:GFP	7870.98	0.99297
w*;nompC[3],UAS-NompC::GFP/nompC[3];nompC-GAL4	NOMPC:GFP	7885.83	0.99304
w*;nompC[3],UAS-NompC::GFP/nompC[3];nompC-GAL4	NOMPC:GFP	7900.68	0.9931
w*;nompC[3],UAS-NompC::GFP/nompC[3];nompC-GAL4	NOMPC:GFP	7915.53	0.99317
w*;nompC[3],UAS-NompC::GFP/nompC[3];nompC-GAL4	NOMPC:GFP	7930.38	0.99323
w*;nompC[3],UAS-NompC::GFP/nompC[3];nompC-GAL4	NOMPC:GFP	7945.23	0.9933
w*;nompC[3],UAS-NompC::GFP/nompC[3];nompC-GAL4	NOMPC:GFP	7960.08	0.99336
w*;nompC[3],UAS-NompC::GFP/nompC[3];nompC-GAL4	NOMPC:GFP	7964.44	0.99338
w*;nompC[3],UAS-NompC::GFP/nompC[3];nompC-GAL4	NOMPC:GFP	7974.93	0.99342
w*;nompC[3],UAS-NompC::GFP/nompC[3];nompC-GAL4	NOMPC:GFP	7989.78	0.99348
w*;nompC[3],UAS-NompC::GFP/nompC[3];nompC-GAL4	NOMPC:GFP	8004.63	0.99354
w*;nompC[3],UAS-NompC::GFP/nompC[3];nompC-GAL4	NOMPC:GFP	8019.48	0.9936
w*;nompC[3],UAS-NompC::GFP/nompC[3];nompC-GAL4	NOMPC:GFP	8034.34	0.99366
w*;nompC[3],UAS-NompC::GFP/nompC[3];nompC-GAL4	NOMPC:GFP	8049.19	0.99372
w*;nompC[3],UAS-NompC::GFP/nompC[3];nompC-GAL4	NOMPC:GFP	8064.04	0.99378
w*;nompC[3],UAS-NompC::GFP/nompC[3];nompC-GAL4	NOMPC:GFP	8078.89	0.99384
w*;nompC[3],UAS-NompC::GFP/nompC[3];nompC-GAL4	NOMPC:GFP	8093.74	0.9939
w*;nompC[3],UAS-NompC::GFP/nompC[3];nompC-GAL4	NOMPC:GFP	8108.59	0.99395
w*;nompC[3],UAS-NompC::GFP/nompC[3];nompC-GAL4	NOMPC:GFP	8123.44	0.99401
w*;nompC[3],UAS-NompC::GFP/nompC[3];nompC-GAL4	NOMPC:GFP	8138.29	0.99407
w*;nompC[3],UAS-NompC::GFP/nompC[3];nompC-GAL4	NOMPC:GFP	8153.14	0.99412
w*;nompC[3],UAS-NompC::GFP/nompC[3];nompC-GAL4	NOMPC:GFP	8167.99	0.99418
w*;nompC[3],UAS-NompC::GFP/nompC[3];nompC-GAL4	NOMPC:GFP	8182.84	0.99423
w*;nompC[3],UAS-NompC::GFP/nompC[3];nompC-GAL4	NOMPC:GFP	8197.7	0.99429
w*;nompC[3],UAS-NompC::GFP/nompC[3];nompC-GAL4	NOMPC:GFP	8212.55	0.99434
w*;nompC[3],UAS-NompC::GFP/nompC[3];nompC-GAL4	NOMPC:GFP	8227.4	0.99439
w*;nompC[3],UAS-NompC::GFP/nompC[3];nompC-GAL4	NOMPC:GFP	8242.25	0.99445
w*;nompC[3],UAS-NompC::GFP/nompC[3];nompC-GAL4	NOMPC:GFP	8257.1	0.9945
w*;nompC[3],UAS-NompC::GFP/nompC[3];nompC-GAL4	NOMPC:GFP	8271.95	0.99455
w*;nompC[3],UAS-NompC::GFP/nompC[3];nompC-GAL4	NOMPC:GFP	8286.8	0.9946
w*;nompC[3],UAS-NompC::GFP/nompC[3];nompC-GAL4	NOMPC:GFP	8301.65	0.99465
w*;nompC[3],UAS-NompC::GFP/nompC[3];nompC-GAL4	NOMPC:GFP	8316.5	0.9947
w*;nompC[3],UAS-NompC::GFP/nompC[3];nompC-GAL4	NOMPC:GFP	8331.35	0.99475
w*;nompC[3],UAS-NompC::GFP/nompC[3];nompC-GAL4	NOMPC:GFP	8346.2	0.9948
w*;nompC[3],UAS-NompC::GFP/nompC[3];nompC-GAL4	NOMPC:GFP	8361.06	0.99485
w*;nompC[3],UAS-NompC::GFP/nompC[3];nompC-GAL4	NOMPC:GFP	8375.91	0.9949
w*;nompC[3],UAS-NompC::GFP/nompC[3];nompC-GAL4	NOMPC:GFP	8390.76	0.99494
w*;nompC[3],UAS-NompC::GFP/nompC[3];nompC-GAL4	NOMPC:GFP	8405.61	0.99499
w*;nompC[3],UAS-NompC::GFP/nompC[3];nompC-GAL4	NOMPC:GFP	8420.46	0.99504
w*;nompC[3],UAS-NompC::GFP/nompC[3];nompC-GAL4	NOMPC:GFP	8435.31	0.99509
w*;nompC[3],UAS-NompC::GFP/nompC[3];nompC-GAL4	NOMPC:GFP	8450.16	0.99513
w*;nompC[3],UAS-NompC::GFP/nompC[3];nompC-GAL4	NOMPC:GFP	8465.01	0.99518
w*;nompC[3],UAS-NompC::GFP/nompC[3];nompC-GAL4	NOMPC:GFP	8479.86	0.99522
w*;nompC[3],UAS-NompC::GFP/nompC[3];nompC-GAL4	NOMPC:GFP	8494.71	0.99527
w*;nompC[3],UAS-NompC::GFP/nompC[3];nompC-GAL4	NOMPC:GFP	8509.56	0.99531
w*;nompC[3],UAS-NompC::GFP/nompC[3];nompC-GAL4	NOMPC:GFP	8524.41	0.99535
w*;nompC[3],UAS-NompC::GFP/nompC[3];nompC-GAL4	NOMPC:GFP	8539.27	0.9954
w*;nompC[3],UAS-NompC::GFP/nompC[3];nompC-GAL4	NOMPC:GFP	8554.12	0.99544
w*;nompC[3],UAS-NompC::GFP/nompC[3];nompC-GAL4	NOMPC:GFP	8568.97	0.99548
w*;nompC[3],UAS-NompC::GFP/nompC[3];nompC-GAL4	NOMPC:GFP	8583.82	0.99553
w*;nompC[3],UAS-NompC::GFP/nompC[3];nompC-GAL4	NOMPC:GFP	8598.67	0.99557
w*;nompC[3],UAS-NompC::GFP/nompC[3];nompC-GAL4	NOMPC:GFP	8613.52	0.99561
w*;nompC[3],UAS-NompC::GFP/nompC[3];nompC-GAL4	NOMPC:GFP	8628.37	0.99565
w*;nompC[3],UAS-NompC::GFP/nompC[3];nompC-GAL4	NOMPC:GFP	8643.22	0.99569
w*;nompC[3],UAS-NompC::GFP/nompC[3];nompC-GAL4	NOMPC:GFP	8658.07	0.99573
w*;nompC[3],UAS-NompC::GFP/nompC[3];nompC-GAL4	NOMPC:GFP	8667.61	0.99576
w*;nompC[3],UAS-NompC::GFP/nompC[3];nompC-GAL4	NOMPC:GFP	8672.92	0.99577
w*;nompC[3],UAS-NompC::GFP/nompC[3];nompC-GAL4	NOMPC:GFP	8687.77	0.99581
w*;nompC[3],UAS-NompC::GFP/nompC[3];nompC-GAL4	NOMPC:GFP	8702.63	0.99585
w*;nompC[3],UAS-NompC::GFP/nompC[3];nompC-GAL4	NOMPC:GFP	8717.48	0.99589
w*;nompC[3],UAS-NompC::GFP/nompC[3];nompC-GAL4	NOMPC:GFP	8732.33	0.99593
w*;nompC[3],UAS-NompC::GFP/nompC[3];nompC-GAL4	NOMPC:GFP	8747.18	0.99597
w*;nompC[3],UAS-NompC::GFP/nompC[3];nompC-GAL4	NOMPC:GFP	8762.03	0.996
w*;nompC[3],UAS-NompC::GFP/nompC[3];nompC-GAL4	NOMPC:GFP	8776.88	0.99604
w*;nompC[3],UAS-NompC::GFP/nompC[3];nompC-GAL4	NOMPC:GFP	8791.73	0.99608
w*;nompC[3],UAS-NompC::GFP/nompC[3];nompC-GAL4	NOMPC:GFP	8806.58	0.99612
w*;nompC[3],UAS-NompC::GFP/nompC[3];nompC-GAL4	NOMPC:GFP	8821.43	0.99615
w*;nompC[3],UAS-NompC::GFP/nompC[3];nompC-GAL4	NOMPC:GFP	8836.28	0.99619
w*;nompC[3],UAS-NompC::GFP/nompC[3];nompC-GAL4	NOMPC:GFP	8851.13	0.99622
w*;nompC[3],UAS-NompC::GFP/nompC[3];nompC-GAL4	NOMPC:GFP	8865.99	0.99626
w*;nompC[3],UAS-NompC::GFP/nompC[3];nompC-GAL4	NOMPC:GFP	8880.84	0.99629
w*;nompC[3],UAS-NompC::GFP/nompC[3];nompC-GAL4	NOMPC:GFP	8895.69	0.99633
w*;nompC[3],UAS-NompC::GFP/nompC[3];nompC-GAL4	NOMPC:GFP	8910.54	0.99636
w*;nompC[3],UAS-NompC::GFP/nompC[3];nompC-GAL4	NOMPC:GFP	8925.39	0.9964
w*;nompC[3],UAS-NompC::GFP/nompC[3];nompC-GAL4	NOMPC:GFP	8940.24	0.99643
w*;nompC[3],UAS-NompC::GFP/nompC[3];nompC-GAL4	NOMPC:GFP	8955.09	0.99646
w*;nompC[3],UAS-NompC::GFP/nompC[3];nompC-GAL4	NOMPC:GFP	8969.94	0.9965
w*;nompC[3],UAS-NompC::GFP/nompC[3];nompC-GAL4	NOMPC:GFP	8977	0.99651
w*;nompC[3],UAS-NompC::GFP/nompC[3];nompC-GAL4	NOMPC:GFP	8984.79	0.99653
w*;nompC[3],UAS-NompC::GFP/nompC[3];nompC-GAL4	NOMPC:GFP	8999.64	0.99656
w*;nompC[3],UAS-NompC::GFP/nompC[3];nompC-GAL4	NOMPC:GFP	9014.49	0.99659
w*;nompC[3],UAS-NompC::GFP/nompC[3];nompC-GAL4	NOMPC:GFP	9029.35	0.99663
w*;nompC[3],UAS-NompC::GFP/nompC[3];nompC-GAL4	NOMPC:GFP	9044.2	0.99666
w*;nompC[3],UAS-NompC::GFP/nompC[3];nompC-GAL4	NOMPC:GFP	9059.05	0.99669
w*;nompC[3],UAS-NompC::GFP/nompC[3];nompC-GAL4	NOMPC:GFP	9073.9	0.99672
w*;nompC[3],UAS-NompC::GFP/nompC[3];nompC-GAL4	NOMPC:GFP	9088.75	0.99675
w*;nompC[3],UAS-NompC::GFP/nompC[3];nompC-GAL4	NOMPC:GFP	9103.6	0.99678
w*;nompC[3],UAS-NompC::GFP/nompC[3];nompC-GAL4	NOMPC:GFP	9118.45	0.99681
w*;nompC[3],UAS-NompC::GFP/nompC[3];nompC-GAL4	NOMPC:GFP	9133.3	0.99684
w*;nompC[3],UAS-NompC::GFP/nompC[3];nompC-GAL4	NOMPC:GFP	9148.15	0.99687
w*;nompC[3],UAS-NompC::GFP/nompC[3];nompC-GAL4	NOMPC:GFP	9163	0.9969
w*;nompC[3],UAS-NompC::GFP/nompC[3];nompC-GAL4	NOMPC:GFP	9177.85	0.99693
w*;nompC[3],UAS-NompC::GFP/nompC[3];nompC-GAL4	NOMPC:GFP	9192.71	0.99696
w*;nompC[3],UAS-NompC::GFP/nompC[3];nompC-GAL4	NOMPC:GFP	9207.56	0.99699
w*;nompC[3],UAS-NompC::GFP/nompC[3];nompC-GAL4	NOMPC:GFP	9222.41	0.99701
w*;nompC[3],UAS-NompC::GFP/nompC[3];nompC-GAL4	NOMPC:GFP	9237.26	0.99704
w*;nompC[3],UAS-NompC::GFP/nompC[3];nompC-GAL4	NOMPC:GFP	9252.11	0.99707
w*;nompC[3],UAS-NompC::GFP/nompC[3];nompC-GAL4	NOMPC:GFP	9266.96	0.9971
w*;nompC[3],UAS-NompC::GFP/nompC[3];nompC-GAL4	NOMPC:GFP	9281.81	0.99713
w*;nompC[3],UAS-NompC::GFP/nompC[3];nompC-GAL4	NOMPC:GFP	9296.66	0.99715
w*;nompC[3],UAS-NompC::GFP/nompC[3];nompC-GAL4	NOMPC:GFP	9311.51	0.99718
w*;nompC[3],UAS-NompC::GFP/nompC[3];nompC-GAL4	NOMPC:GFP	9326.36	0.99721
w*;nompC[3],UAS-NompC::GFP/nompC[3];nompC-GAL4	NOMPC:GFP	9341.21	0.99723
w*;nompC[3],UAS-NompC::GFP/nompC[3];nompC-GAL4	NOMPC:GFP	9356.07	0.99726
w*;nompC[3],UAS-NompC::GFP/nompC[3];nompC-GAL4	NOMPC:GFP	9370.92	0.99728
w*;nompC[3],UAS-NompC::GFP/nompC[3];nompC-GAL4	NOMPC:GFP	9385.77	0.99731
w*;nompC[3],UAS-NompC::GFP/nompC[3];nompC-GAL4	NOMPC:GFP	9400.62	0.99733
w*;nompC[3],UAS-NompC::GFP/nompC[3];nompC-GAL4	NOMPC:GFP	9415.47	0.99736
w*;nompC[3],UAS-NompC::GFP/nompC[3];nompC-GAL4	NOMPC:GFP	9430.32	0.99738
w*;nompC[3],UAS-NompC::GFP/nompC[3];nompC-GAL4	NOMPC:GFP	9445.17	0.99741
w*;nompC[3],UAS-NompC::GFP/nompC[3];nompC-GAL4	NOMPC:GFP	9460.02	0.99743
w*;nompC[3],UAS-NompC::GFP/nompC[3];nompC-GAL4	NOMPC:GFP	9474.87	0.99746
w*;nompC[3],UAS-NompC::GFP/nompC[3];nompC-GAL4	NOMPC:GFP	9489.72	0.99748
w*;nompC[3],UAS-NompC::GFP/nompC[3];nompC-GAL4	NOMPC:GFP	9504.57	0.9975
w*;nompC[3],UAS-NompC::GFP/nompC[3];nompC-GAL4	NOMPC:GFP	9519.43	0.99753
w*;nompC[3],UAS-NompC::GFP/nompC[3];nompC-GAL4	NOMPC:GFP	9534.28	0.99755
w*;nompC[3],UAS-NompC::GFP/nompC[3];nompC-GAL4	NOMPC:GFP	9545.5	0.99757
w*;nompC[3],UAS-NompC::GFP/nompC[3];nompC-GAL4	NOMPC:GFP	9549.13	0.99757
w*;nompC[3],UAS-NompC::GFP/nompC[3];nompC-GAL4	NOMPC:GFP	9563.98	0.9976
w*;nompC[3],UAS-NompC::GFP/nompC[3];nompC-GAL4	NOMPC:GFP	9578.83	0.99762
w*;nompC[3],UAS-NompC::GFP/nompC[3];nompC-GAL4	NOMPC:GFP	9579.64	0.99762
w*;nompC[3],UAS-NompC::GFP/nompC[3];nompC-GAL4	NOMPC:GFP	9593.68	0.99764
w*;nompC[3],UAS-NompC::GFP/nompC[3];nompC-GAL4	NOMPC:GFP	9608.53	0.99766
w*;nompC[3],UAS-NompC::GFP/nompC[3];nompC-GAL4	NOMPC:GFP	9623.38	0.99768
w*;nompC[3],UAS-NompC::GFP/nompC[3];nompC-GAL4	NOMPC:GFP	9638.23	0.99771
w*;nompC[3],UAS-NompC::GFP/nompC[3];nompC-GAL4	NOMPC:GFP	9653.08	0.99773
w*;nompC[3],UAS-NompC::GFP/nompC[3];nompC-GAL4	NOMPC:GFP	9667.93	0.99775
w*;nompC[3],UAS-NompC::GFP/nompC[3];nompC-GAL4	NOMPC:GFP	9682.78	0.99777
w*;nompC[3],UAS-NompC::GFP/nompC[3];nompC-GAL4	NOMPC:GFP	9697.64	0.99779
w*;nompC[3],UAS-NompC::GFP/nompC[3];nompC-GAL4	NOMPC:GFP	9697.98	0.99779
w*;nompC[3],UAS-NompC::GFP/nompC[3];nompC-GAL4	NOMPC:GFP	9712.49	0.99781
w*;nompC[3],UAS-NompC::GFP/nompC[3];nompC-GAL4	NOMPC:GFP	9727.34	0.99783
w*;nompC[3],UAS-NompC::GFP/nompC[3];nompC-GAL4	NOMPC:GFP	9742.19	0.99785
w*;nompC[3],UAS-NompC::GFP/nompC[3];nompC-GAL4	NOMPC:GFP	9757.04	0.99787
w*;nompC[3],UAS-NompC::GFP/nompC[3];nompC-GAL4	NOMPC:GFP	9771.89	0.99789
w*;nompC[3],UAS-NompC::GFP/nompC[3];nompC-GAL4	NOMPC:GFP	9786.74	0.99791
w*;nompC[3],UAS-NompC::GFP/nompC[3];nompC-GAL4	NOMPC:GFP	9801.59	0.99793
w*;nompC[3],UAS-NompC::GFP/nompC[3];nompC-GAL4	NOMPC:GFP	9816.44	0.99795
w*;nompC[3],UAS-NompC::GFP/nompC[3];nompC-GAL4	NOMPC:GFP	9831.29	0.99797
w*;nompC[3],UAS-NompC::GFP/nompC[3];nompC-GAL4	NOMPC:GFP	9846.14	0.99799
w*;nompC[3],UAS-NompC::GFP/nompC[3];nompC-GAL4	NOMPC:GFP	9861	0.99801
w*;nompC[3],UAS-NompC::GFP/nompC[3];nompC-GAL4	NOMPC:GFP	9875.85	0.99803
w*;nompC[3],UAS-NompC::GFP/nompC[3];nompC-GAL4	NOMPC:GFP	9890.7	0.99805
w*;nompC[3],UAS-NompC::GFP/nompC[3];nompC-GAL4	NOMPC:GFP	9905.55	0.99806
w*;nompC[3],UAS-NompC::GFP/nompC[3];nompC-GAL4	NOMPC:GFP	9920.4	0.99808
w*;nompC[3],UAS-NompC::GFP/nompC[3];nompC-GAL4	NOMPC:GFP	9935.25	0.9981
w*;nompC[3],UAS-NompC::GFP/nompC[3];nompC-GAL4	NOMPC:GFP	9950.1	0.99812
w*;nompC[3],UAS-NompC::GFP/nompC[3];nompC-GAL4	NOMPC:GFP	9964.95	0.99814
w*;nompC[3],UAS-NompC::GFP/nompC[3];nompC-GAL4	NOMPC:GFP	9979.8	0.99815
w*;nompC[3],UAS-NompC::GFP/nompC[3];nompC-GAL4	NOMPC:GFP	9994.65	0.99817
w*;nompC[3],UAS-NompC::GFP/nompC[3];nompC-GAL4	NOMPC:GFP	10009.5	0.99819
w*;nompC[3],UAS-NompC::GFP/nompC[3];nompC-GAL4	NOMPC:GFP	10024.4	0.9982
w*;nompC[3],UAS-NompC::GFP/nompC[3];nompC-GAL4	NOMPC:GFP	10039.2	0.99822
w*;nompC[3],UAS-NompC::GFP/nompC[3];nompC-GAL4	NOMPC:GFP	10054.1	0.99824
w*;nompC[3],UAS-NompC::GFP/nompC[3];nompC-GAL4	NOMPC:GFP	10068.9	0.99825
w*;nompC[3],UAS-NompC::GFP/nompC[3];nompC-GAL4	NOMPC:GFP	10083.8	0.99827
w*;nompC[3],UAS-NompC::GFP/nompC[3];nompC-GAL4	NOMPC:GFP	10098.6	0.99829
w*;nompC[3],UAS-NompC::GFP/nompC[3];nompC-GAL4	NOMPC:GFP	10113.5	0.9983
w*;nompC[3],UAS-NompC::GFP/nompC[3];nompC-GAL4	NOMPC:GFP	10128.3	0.99832
w*;nompC[3],UAS-NompC::GFP/nompC[3];nompC-GAL4	NOMPC:GFP	10142.1	0.99833
w*;nompC[3],UAS-NompC::GFP/nompC[3];nompC-GAL4	NOMPC:GFP	10143.2	0.99833
w*;nompC[3],UAS-NompC::GFP/nompC[3];nompC-GAL4	NOMPC:GFP	10158	0.99835
w*;nompC[3],UAS-NompC::GFP/nompC[3];nompC-GAL4	NOMPC:GFP	10172.9	0.99837
w*;nompC[3],UAS-NompC::GFP/nompC[3];nompC-GAL4	NOMPC:GFP	10187.7	0.99838
w*;nompC[3],UAS-NompC::GFP/nompC[3];nompC-GAL4	NOMPC:GFP	10202.6	0.9984
w*;nompC[3],UAS-NompC::GFP/nompC[3];nompC-GAL4	NOMPC:GFP	10217.4	0.99841
w*;nompC[3],UAS-NompC::GFP/nompC[3];nompC-GAL4	NOMPC:GFP	10232.3	0.99843
w*;nompC[3],UAS-NompC::GFP/nompC[3];nompC-GAL4	NOMPC:GFP	10247.1	0.99844
w*;nompC[3],UAS-NompC::GFP/nompC[3];nompC-GAL4	NOMPC:GFP	10262	0.99845
w*;nompC[3],UAS-NompC::GFP/nompC[3];nompC-GAL4	NOMPC:GFP	10276.8	0.99847
w*;nompC[3],UAS-NompC::GFP/nompC[3];nompC-GAL4	NOMPC:GFP	10291.7	0.99848
w*;nompC[3],UAS-NompC::GFP/nompC[3];nompC-GAL4	NOMPC:GFP	10306.5	0.9985
w*;nompC[3],UAS-NompC::GFP/nompC[3];nompC-GAL4	NOMPC:GFP	10321.4	0.99851
w*;nompC[3],UAS-NompC::GFP/nompC[3];nompC-GAL4	NOMPC:GFP	10336.2	0.99853
w*;nompC[3],UAS-NompC::GFP/nompC[3];nompC-GAL4	NOMPC:GFP	10351.1	0.99854
w*;nompC[3],UAS-NompC::GFP/nompC[3];nompC-GAL4	NOMPC:GFP	10365.9	0.99855
w*;nompC[3],UAS-NompC::GFP/nompC[3];nompC-GAL4	NOMPC:GFP	10380.8	0.99857
w*;nompC[3],UAS-NompC::GFP/nompC[3];nompC-GAL4	NOMPC:GFP	10395.6	0.99858
w*;nompC[3],UAS-NompC::GFP/nompC[3];nompC-GAL4	NOMPC:GFP	10410.5	0.99859
w*;nompC[3],UAS-NompC::GFP/nompC[3];nompC-GAL4	NOMPC:GFP	10425.3	0.99861
w*;nompC[3],UAS-NompC::GFP/nompC[3];nompC-GAL4	NOMPC:GFP	10440.2	0.99862
w*;nompC[3],UAS-NompC::GFP/nompC[3];nompC-GAL4	NOMPC:GFP	10455	0.99863
w*;nompC[3],UAS-NompC::GFP/nompC[3];nompC-GAL4	NOMPC:GFP	10469.9	0.99865
w*;nompC[3],UAS-NompC::GFP/nompC[3];nompC-GAL4	NOMPC:GFP	10484.7	0.99866
w*;nompC[3],UAS-NompC::GFP/nompC[3];nompC-GAL4	NOMPC:GFP	10499.6	0.99867
w*;nompC[3],UAS-NompC::GFP/nompC[3];nompC-GAL4	NOMPC:GFP	10514.4	0.99868
w*;nompC[3],UAS-NompC::GFP/nompC[3];nompC-GAL4	NOMPC:GFP	10529.3	0.9987
w*;nompC[3],UAS-NompC::GFP/nompC[3];nompC-GAL4	NOMPC:GFP	10544.1	0.99871
w*;nompC[3],UAS-NompC::GFP/nompC[3];nompC-GAL4	NOMPC:GFP	10559	0.99872
w*;nompC[3],UAS-NompC::GFP/nompC[3];nompC-GAL4	NOMPC:GFP	10573.8	0.99873
w*;nompC[3],UAS-NompC::GFP/nompC[3];nompC-GAL4	NOMPC:GFP	10588.7	0.99874
w*;nompC[3],UAS-NompC::GFP/nompC[3];nompC-GAL4	NOMPC:GFP	10603.5	0.99876
w*;nompC[3],UAS-NompC::GFP/nompC[3];nompC-GAL4	NOMPC:GFP	10618.4	0.99877
w*;nompC[3],UAS-NompC::GFP/nompC[3];nompC-GAL4	NOMPC:GFP	10633.2	0.99878
w*;nompC[3],UAS-NompC::GFP/nompC[3];nompC-GAL4	NOMPC:GFP	10648.1	0.99879
w*;nompC[3],UAS-NompC::GFP/nompC[3];nompC-GAL4	NOMPC:GFP	10662.9	0.9988
w*;nompC[3],UAS-NompC::GFP/nompC[3];nompC-GAL4	NOMPC:GFP	10677.8	0.99881
w*;nompC[3],UAS-NompC::GFP/nompC[3];nompC-GAL4	NOMPC:GFP	10692.6	0.99882
w*;nompC[3],UAS-NompC::GFP/nompC[3];nompC-GAL4	NOMPC:GFP	10707.5	0.99883
w*;nompC[3],UAS-NompC::GFP/nompC[3];nompC-GAL4	NOMPC:GFP	10722.3	0.99885
w*;nompC[3],UAS-NompC::GFP/nompC[3];nompC-GAL4	NOMPC:GFP	10737.2	0.99886
w*;nompC[3],UAS-NompC::GFP/nompC[3];nompC-GAL4	NOMPC:GFP	10752	0.99887
w*;nompC[3],UAS-NompC::GFP/nompC[3];nompC-GAL4	NOMPC:GFP	10766.9	0.99888
w*;nompC[3],UAS-NompC::GFP/nompC[3];nompC-GAL4	NOMPC:GFP	10781.8	0.99889
w*;nompC[3],UAS-NompC::GFP/nompC[3];nompC-GAL4	NOMPC:GFP	10796.6	0.9989
w*;nompC[3],UAS-NompC::GFP/nompC[3];nompC-GAL4	NOMPC:GFP	10811.5	0.99891
w*;nompC[3],UAS-NompC::GFP/nompC[3];nompC-GAL4	NOMPC:GFP	10826.3	0.99892
w*;nompC[3],UAS-NompC::GFP/nompC[3];nompC-GAL4	NOMPC:GFP	10841.2	0.99893
w*;nompC[3],UAS-NompC::GFP/nompC[3];nompC-GAL4	NOMPC:GFP	10856	0.99894
w*;nompC[3],UAS-NompC::GFP/nompC[3];nompC-GAL4	NOMPC:GFP	10870.9	0.99895
w*;nompC[3],UAS-NompC::GFP/nompC[3];nompC-GAL4	NOMPC:GFP	10885.7	0.99896
w*;nompC[3],UAS-NompC::GFP/nompC[3];nompC-GAL4	NOMPC:GFP	10900.6	0.99897
w*;nompC[3],UAS-NompC::GFP/nompC[3];nompC-GAL4	NOMPC:GFP	10915.4	0.99898
w*;nompC[3],UAS-NompC::GFP/nompC[3];nompC-GAL4	NOMPC:GFP	10930.3	0.99899
w*;nompC[3],UAS-NompC::GFP/nompC[3];nompC-GAL4	NOMPC:GFP	10945.1	0.999
w*;nompC[3],UAS-NompC::GFP/nompC[3];nompC-GAL4	NOMPC:GFP	10960	0.99901
w*;nompC[3],UAS-NompC::GFP/nompC[3];nompC-GAL4	NOMPC:GFP	10974.8	0.99902
w*;nompC[3],UAS-NompC::GFP/nompC[3];nompC-GAL4	NOMPC:GFP	10989.7	0.99903
w*;nompC[3],UAS-NompC::GFP/nompC[3];nompC-GAL4	NOMPC:GFP	11004.5	0.99903
w*;nompC[3],UAS-NompC::GFP/nompC[3];nompC-GAL4	NOMPC:GFP	11019.4	0.99904
w*;nompC[3],UAS-NompC::GFP/nompC[3];nompC-GAL4	NOMPC:GFP	11034.2	0.99905
w*;nompC[3],UAS-NompC::GFP/nompC[3];nompC-GAL4	NOMPC:GFP	11049.1	0.99906
w*;nompC[3],UAS-NompC::GFP/nompC[3];nompC-GAL4	NOMPC:GFP	11063.9	0.99907
w*;nompC[3],UAS-NompC::GFP/nompC[3];nompC-GAL4	NOMPC:GFP	11078.8	0.99908
w*;nompC[3],UAS-NompC::GFP/nompC[3];nompC-GAL4	NOMPC:GFP	11093.6	0.99909
w*;nompC[3],UAS-NompC::GFP/nompC[3];nompC-GAL4	NOMPC:GFP	11108.5	0.9991
w*;nompC[3],UAS-NompC::GFP/nompC[3];nompC-GAL4	NOMPC:GFP	11123.3	0.9991
w*;nompC[3],UAS-NompC::GFP/nompC[3];nompC-GAL4	NOMPC:GFP	11138.2	0.99911
w*;nompC[3],UAS-NompC::GFP/nompC[3];nompC-GAL4	NOMPC:GFP	11153	0.99912
w*;nompC[3],UAS-NompC::GFP/nompC[3];nompC-GAL4	NOMPC:GFP	11167.9	0.99913
w*;nompC[3],UAS-NompC::GFP/nompC[3];nompC-GAL4	NOMPC:GFP	11182.7	0.99914
w*;nompC[3],UAS-NompC::GFP/nompC[3];nompC-GAL4	NOMPC:GFP	11197.6	0.99915
w*;nompC[3],UAS-NompC::GFP/nompC[3];nompC-GAL4	NOMPC:GFP	11212.4	0.99915
w*;nompC[3],UAS-NompC::GFP/nompC[3];nompC-GAL4	NOMPC:GFP	11227.3	0.99916
w*;nompC[3],UAS-NompC::GFP/nompC[3];nompC-GAL4	NOMPC:GFP	11242.1	0.99917
w*;nompC[3],UAS-NompC::GFP/nompC[3];nompC-GAL4	NOMPC:GFP	11257	0.99918
w*;nompC[3],UAS-NompC::GFP/nompC[3];nompC-GAL4	NOMPC:GFP	11271.8	0.99919
w*;nompC[3],UAS-NompC::GFP/nompC[3];nompC-GAL4	NOMPC:GFP	11286.7	0.99919
w*;nompC[3],UAS-NompC::GFP/nompC[3];nompC-GAL4	NOMPC:GFP	11301.5	0.9992
w*;nompC[3],UAS-NompC::GFP/nompC[3];nompC-GAL4	NOMPC:GFP	11316.4	0.99921
w*;nompC[3],UAS-NompC::GFP/nompC[3];nompC-GAL4	NOMPC:GFP	11331.2	0.99922
w*;nompC[3],UAS-NompC::GFP/nompC[3];nompC-GAL4	NOMPC:GFP	11346.1	0.99922
w*;nompC[3],UAS-NompC::GFP/nompC[3];nompC-GAL4	NOMPC:GFP	11360.9	0.99923
w*;nompC[3],UAS-NompC::GFP/nompC[3];nompC-GAL4	NOMPC:GFP	11375.8	0.99924
w*;nompC[3],UAS-NompC::GFP/nompC[3];nompC-GAL4	NOMPC:GFP	11390.6	0.99924
w*;nompC[3],UAS-NompC::GFP/nompC[3];nompC-GAL4	NOMPC:GFP	11405.5	0.99925
w*;nompC[3],UAS-NompC::GFP/nompC[3];nompC-GAL4	NOMPC:GFP	11420.3	0.99926
w*;nompC[3],UAS-NompC::GFP/nompC[3];nompC-GAL4	NOMPC:GFP	11435.2	0.99927
w*;nompC[3],UAS-NompC::GFP/nompC[3];nompC-GAL4	NOMPC:GFP	11450	0.99927
w*;nompC[3],UAS-NompC::GFP/nompC[3];nompC-GAL4	NOMPC:GFP	11464.9	0.99928
w*;nompC[3],UAS-NompC::GFP/nompC[3];nompC-GAL4	NOMPC:GFP	11479.7	0.99929
w*;nompC[3],UAS-NompC::GFP/nompC[3];nompC-GAL4	NOMPC:GFP	11494.6	0.99929
w*;nompC[3],UAS-NompC::GFP/nompC[3];nompC-GAL4	NOMPC:GFP	11509.4	0.9993
w*;nompC[3],UAS-NompC::GFP/nompC[3];nompC-GAL4	NOMPC:GFP	11524.3	0.99931
w*;nompC[3],UAS-NompC::GFP/nompC[3];nompC-GAL4	NOMPC:GFP	11539.1	0.99931
w*;nompC[3],UAS-NompC::GFP/nompC[3];nompC-GAL4	NOMPC:GFP	11554	0.99932
w*;nompC[3],UAS-NompC::GFP/nompC[3];nompC-GAL4	NOMPC:GFP	11568.8	0.99932
w*;nompC[3],UAS-NompC::GFP/nompC[3];nompC-GAL4	NOMPC:GFP	11583.7	0.99933
w*;nompC[3],UAS-NompC::GFP/nompC[3];nompC-GAL4	NOMPC:GFP	11598.6	0.99934
w*;nompC[3],UAS-NompC::GFP/nompC[3];nompC-GAL4	NOMPC:GFP	11613.4	0.99934
w*;nompC[3],UAS-NompC::GFP/nompC[3];nompC-GAL4	NOMPC:GFP	11628.3	0.99935
w*;nompC[3],UAS-NompC::GFP/nompC[3];nompC-GAL4	NOMPC:GFP	11643.1	0.99936
w*;nompC[3],UAS-NompC::GFP/nompC[3];nompC-GAL4	NOMPC:GFP	11658	0.99936
w*;nompC[3],UAS-NompC::GFP/nompC[3];nompC-GAL4	NOMPC:GFP	11672.8	0.99937
w*;nompC[3],UAS-NompC::GFP/nompC[3];nompC-GAL4	NOMPC:GFP	11687.7	0.99937
w*;nompC[3],UAS-NompC::GFP/nompC[3];nompC-GAL4	NOMPC:GFP	11702.5	0.99938
w*;nompC[3],UAS-NompC::GFP/nompC[3];nompC-GAL4	NOMPC:GFP	11717.4	0.99939
w*;nompC[3],UAS-NompC::GFP/nompC[3];nompC-GAL4	NOMPC:GFP	11732.2	0.99939
w*;nompC[3],UAS-NompC::GFP/nompC[3];nompC-GAL4	NOMPC:GFP	11747.1	0.9994
w*;nompC[3],UAS-NompC::GFP/nompC[3];nompC-GAL4	NOMPC:GFP	11761.9	0.9994
w*;nompC[3],UAS-NompC::GFP/nompC[3];nompC-GAL4	NOMPC:GFP	11776.8	0.99941
w*;nompC[3],UAS-NompC::GFP/nompC[3];nompC-GAL4	NOMPC:GFP	11791.6	0.99941
w*;nompC[3],UAS-NompC::GFP/nompC[3];nompC-GAL4	NOMPC:GFP	11806.5	0.99942
w*;nompC[3],UAS-NompC::GFP/nompC[3];nompC-GAL4	NOMPC:GFP	11821.3	0.99942
w*;nompC[3],UAS-NompC::GFP/nompC[3];nompC-GAL4	NOMPC:GFP	11836.2	0.99943
w*;nompC[3],UAS-NompC::GFP/nompC[3];nompC-GAL4	NOMPC:GFP	11851	0.99944
w*;nompC[3],UAS-NompC::GFP/nompC[3];nompC-GAL4	NOMPC:GFP	11865.9	0.99944
w*;nompC[3],UAS-NompC::GFP/nompC[3];nompC-GAL4	NOMPC:GFP	11880.7	0.99945
w*;nompC[3],UAS-NompC::GFP/nompC[3];nompC-GAL4	NOMPC:GFP	11895.6	0.99945
w*;nompC[3],UAS-NompC::GFP/nompC[3];nompC-GAL4	NOMPC:GFP	11910.4	0.99946
w*;nompC[3],UAS-NompC::GFP/nompC[3];nompC-GAL4	NOMPC:GFP	11925.3	0.99946
w*;nompC[3],UAS-NompC::GFP/nompC[3];nompC-GAL4	NOMPC:GFP	11940.1	0.99947
w*;nompC[3],UAS-NompC::GFP/nompC[3];nompC-GAL4	NOMPC:GFP	11955	0.99947
w*;nompC[3],UAS-NompC::GFP/nompC[3];nompC-GAL4	NOMPC:GFP	11969.8	0.99948
w*;nompC[3],UAS-NompC::GFP/nompC[3];nompC-GAL4	NOMPC:GFP	11984.7	0.99948
w*;nompC[3],UAS-NompC::GFP/nompC[3];nompC-GAL4	NOMPC:GFP	11999.5	0.99949
w*;nompC[3],UAS-NompC::GFP/nompC[3];nompC-GAL4	NOMPC:GFP	12014.4	0.99949
w*;nompC[3],UAS-NompC::GFP/nompC[3];nompC-GAL4	NOMPC:GFP	12029.2	0.9995
w*;nompC[3],UAS-NompC::GFP/nompC[3];nompC-GAL4	NOMPC:GFP	12044.1	0.9995
w*;nompC[3],UAS-NompC::GFP/nompC[3];nompC-GAL4	NOMPC:GFP	12058.9	0.99951
w*;nompC[3],UAS-NompC::GFP/nompC[3];nompC-GAL4	NOMPC:GFP	12073.8	0.99951
w*;nompC[3],UAS-NompC::GFP/nompC[3];nompC-GAL4	NOMPC:GFP	12088.6	0.99951
w*;nompC[3],UAS-NompC::GFP/nompC[3];nompC-GAL4	NOMPC:GFP	12103.5	0.99952
w*;nompC[3],UAS-NompC::GFP/nompC[3];nompC-GAL4	NOMPC:GFP	12118.3	0.99952
w*;nompC[3],UAS-NompC::GFP/nompC[3];nompC-GAL4	NOMPC:GFP	12133.2	0.99953
w*;nompC[3],UAS-NompC::GFP/nompC[3];nompC-GAL4	NOMPC:GFP	12148	0.99953
w*;nompC[3],UAS-NompC::GFP/nompC[3];nompC-GAL4	NOMPC:GFP	12162.9	0.99954
w*;nompC[3],UAS-NompC::GFP/nompC[3];nompC-GAL4	NOMPC:GFP	12177.7	0.99954
w*;nompC[3],UAS-NompC::GFP/nompC[3];nompC-GAL4	NOMPC:GFP	12192.6	0.99955
w*;nompC[3],UAS-NompC::GFP/nompC[3];nompC-GAL4	NOMPC:GFP	12207.4	0.99955
w*;nompC[3],UAS-NompC::GFP/nompC[3];nompC-GAL4	NOMPC:GFP	12222.3	0.99955
w*;nompC[3],UAS-NompC::GFP/nompC[3];nompC-GAL4	NOMPC:GFP	12237.1	0.99956
w*;nompC[3],UAS-NompC::GFP/nompC[3];nompC-GAL4	NOMPC:GFP	12252	0.99956
w*;nompC[3],UAS-NompC::GFP/nompC[3];nompC-GAL4	NOMPC:GFP	12266.8	0.99957
w*;nompC[3],UAS-NompC::GFP/nompC[3];nompC-GAL4	NOMPC:GFP	12281.7	0.99957
w*;nompC[3],UAS-NompC::GFP/nompC[3];nompC-GAL4	NOMPC:GFP	12296.5	0.99957
w*;nompC[3],UAS-NompC::GFP/nompC[3];nompC-GAL4	NOMPC:GFP	12311.4	0.99958
w*;nompC[3],UAS-NompC::GFP/nompC[3];nompC-GAL4	NOMPC:GFP	12319.4	0.99958
w*;nompC[3],UAS-NompC::GFP/nompC[3];nompC-GAL4	NOMPC:GFP	12326.2	0.99958
w*;nompC[3],UAS-NompC::GFP/nompC[3];nompC-GAL4	NOMPC:GFP	12341.1	0.99959
w*;nompC[3],UAS-NompC::GFP/nompC[3];nompC-GAL4	NOMPC:GFP	12355.9	0.99959
w*;nompC[3],UAS-NompC::GFP/nompC[3];nompC-GAL4	NOMPC:GFP	12370.8	0.99959
w*;nompC[3],UAS-NompC::GFP/nompC[3];nompC-GAL4	NOMPC:GFP	12385.6	0.9996
w*;nompC[3],UAS-NompC::GFP/nompC[3];nompC-GAL4	NOMPC:GFP	12400.5	0.9996
w*;nompC[3],UAS-NompC::GFP/nompC[3];nompC-GAL4	NOMPC:GFP	12415.4	0.99961
w*;nompC[3],UAS-NompC::GFP/nompC[3];nompC-GAL4	NOMPC:GFP	12430.2	0.99961
w*;nompC[3],UAS-NompC::GFP/nompC[3];nompC-GAL4	NOMPC:GFP	12445.1	0.99961
w*;nompC[3],UAS-NompC::GFP/nompC[3];nompC-GAL4	NOMPC:GFP	12459.9	0.99962
w*;nompC[3],UAS-NompC::GFP/nompC[3];nompC-GAL4	NOMPC:GFP	12474.8	0.99962
w*;nompC[3],UAS-NompC::GFP/nompC[3];nompC-GAL4	NOMPC:GFP	12489.6	0.99962
w*;nompC[3],UAS-NompC::GFP/nompC[3];nompC-GAL4	NOMPC:GFP	12504.5	0.99963
w*;nompC[3],UAS-NompC::GFP/nompC[3];nompC-GAL4	NOMPC:GFP	12519.3	0.99963
w*;nompC[3],UAS-NompC::GFP/nompC[3];nompC-GAL4	NOMPC:GFP	12534.2	0.99963
w*;nompC[3],UAS-NompC::GFP/nompC[3];nompC-GAL4	NOMPC:GFP	12549	0.99964
w*;nompC[3],UAS-NompC::GFP/nompC[3];nompC-GAL4	NOMPC:GFP	12563.9	0.99964
w*;nompC[3],UAS-NompC::GFP/nompC[3];nompC-GAL4	NOMPC:GFP	12578.7	0.99964
w*;nompC[3],UAS-NompC::GFP/nompC[3];nompC-GAL4	NOMPC:GFP	12593.6	0.99965
w*;nompC[3],UAS-NompC::GFP/nompC[3];nompC-GAL4	NOMPC:GFP	12608.4	0.99965
w*;nompC[3],UAS-NompC::GFP/nompC[3];nompC-GAL4	NOMPC:GFP	12623.3	0.99965
w*;nompC[3],UAS-NompC::GFP/nompC[3];nompC-GAL4	NOMPC:GFP	12638.1	0.99966
w*;nompC[3],UAS-NompC::GFP/nompC[3];nompC-GAL4	NOMPC:GFP	12653	0.99966
w*;nompC[3],UAS-NompC::GFP/nompC[3];nompC-GAL4	NOMPC:GFP	12667.8	0.99966
w*;nompC[3],UAS-NompC::GFP/nompC[3];nompC-GAL4	NOMPC:GFP	12682.7	0.99967
w*;nompC[3],UAS-NompC::GFP/nompC[3];nompC-GAL4	NOMPC:GFP	12697.5	0.99967
w*;nompC[3],UAS-NompC::GFP/nompC[3];nompC-GAL4	NOMPC:GFP	12712.4	0.99967
w*;nompC[3],UAS-NompC::GFP/nompC[3];nompC-GAL4	NOMPC:GFP	12727.2	0.99968
w*;nompC[3],UAS-NompC::GFP/nompC[3];nompC-GAL4	NOMPC:GFP	12742.1	0.99968
w*;nompC[3],UAS-NompC::GFP/nompC[3];nompC-GAL4	NOMPC:GFP	12756.9	0.99968
w*;nompC[3],UAS-NompC::GFP/nompC[3];nompC-GAL4	NOMPC:GFP	12771.8	0.99968
w*;nompC[3],UAS-NompC::GFP/nompC[3];nompC-GAL4	NOMPC:GFP	12786.6	0.99969
w*;nompC[3],UAS-NompC::GFP/nompC[3];nompC-GAL4	NOMPC:GFP	12801.5	0.99969
w*;nompC[3],UAS-NompC::GFP/nompC[3];nompC-GAL4	NOMPC:GFP	12816.3	0.99969
w*;nompC[3],UAS-NompC::GFP/nompC[3];nompC-GAL4	NOMPC:GFP	12831.2	0.9997
w*;nompC[3],UAS-NompC::GFP/nompC[3];nompC-GAL4	NOMPC:GFP	12846	0.9997
w*;nompC[3],UAS-NompC::GFP/nompC[3];nompC-GAL4	NOMPC:GFP	12860.9	0.9997
w*;nompC[3],UAS-NompC::GFP/nompC[3];nompC-GAL4	NOMPC:GFP	12875.7	0.9997
w*;nompC[3],UAS-NompC::GFP/nompC[3];nompC-GAL4	NOMPC:GFP	12890.6	0.99971
w*;nompC[3],UAS-NompC::GFP/nompC[3];nompC-GAL4	NOMPC:GFP	12905.4	0.99971
w*;nompC[3],UAS-NompC::GFP/nompC[3];nompC-GAL4	NOMPC:GFP	12920.3	0.99971
w*;nompC[3],UAS-NompC::GFP/nompC[3];nompC-GAL4	NOMPC:GFP	12935.1	0.99972
w*;nompC[3],UAS-NompC::GFP/nompC[3];nompC-GAL4	NOMPC:GFP	12950	0.99972
w*;nompC[3],UAS-NompC::GFP/nompC[3];nompC-GAL4	NOMPC:GFP	12964.8	0.99972
w*;nompC[3],UAS-NompC::GFP/nompC[3];nompC-GAL4	NOMPC:GFP	12979.7	0.99972
w*;nompC[3],UAS-NompC::GFP/nompC[3];nompC-GAL4	NOMPC:GFP	12994.5	0.99973
w*;nompC[3],UAS-NompC::GFP/nompC[3];nompC-GAL4	NOMPC:GFP	13009.4	0.99973
w*;nompC[3],UAS-NompC::GFP/nompC[3];nompC-GAL4	NOMPC:GFP	13024.2	0.99973
w*;nompC[3],UAS-NompC::GFP/nompC[3];nompC-GAL4	NOMPC:GFP	13039.1	0.99973
w*;nompC[3],UAS-NompC::GFP/nompC[3];nompC-GAL4	NOMPC:GFP	13053.9	0.99974
w*;nompC[3],UAS-NompC::GFP/nompC[3];nompC-GAL4	NOMPC:GFP	13068.8	0.99974
w*;nompC[3],UAS-NompC::GFP/nompC[3];nompC-GAL4	NOMPC:GFP	13083.6	0.99974
w*;nompC[3],UAS-NompC::GFP/nompC[3];nompC-GAL4	NOMPC:GFP	13098.5	0.99974
w*;nompC[3],UAS-NompC::GFP/nompC[3];nompC-GAL4	NOMPC:GFP	13113.3	0.99975
w*;nompC[3],UAS-NompC::GFP/nompC[3];nompC-GAL4	NOMPC:GFP	13128.2	0.99975
w*;nompC[3],UAS-NompC::GFP/nompC[3];nompC-GAL4	NOMPC:GFP	13143	0.99975
w*;nompC[3],UAS-NompC::GFP/nompC[3];nompC-GAL4	NOMPC:GFP	13157.9	0.99975
w*;nompC[3],UAS-NompC::GFP/nompC[3];nompC-GAL4	NOMPC:GFP	13172.7	0.99976
w*;nompC[3],UAS-NompC::GFP/nompC[3];nompC-GAL4	NOMPC:GFP	13187.6	0.99976
w*;nompC[3],UAS-NompC::GFP/nompC[3];nompC-GAL4	NOMPC:GFP	13202.4	0.99976
w*;nompC[3],UAS-NompC::GFP/nompC[3];nompC-GAL4	NOMPC:GFP	13217.3	0.99976
w*;nompC[3],UAS-NompC::GFP/nompC[3];nompC-GAL4	NOMPC:GFP	13232.1	0.99976
w*;nompC[3],UAS-NompC::GFP/nompC[3];nompC-GAL4	NOMPC:GFP	13247	0.99977
w*;nompC[3],UAS-NompC::GFP/nompC[3];nompC-GAL4	NOMPC:GFP	13261.9	0.99977
w*;nompC[3],UAS-NompC::GFP/nompC[3];nompC-GAL4	NOMPC:GFP	13276.7	0.99977
w*;nompC[3],UAS-NompC::GFP/nompC[3];nompC-GAL4	NOMPC:GFP	13291.6	0.99977
w*;nompC[3],UAS-NompC::GFP/nompC[3];nompC-GAL4	NOMPC:GFP	13306.4	0.99978
w*;nompC[3],UAS-NompC::GFP/nompC[3];nompC-GAL4	NOMPC:GFP	13321.3	0.99978
w*;nompC[3],UAS-NompC::GFP/nompC[3];nompC-GAL4	NOMPC:GFP	13336.1	0.99978
w*;nompC[3],UAS-NompC::GFP/nompC[3];nompC-GAL4	NOMPC:GFP	13351	0.99978
w*;nompC[3],UAS-NompC::GFP/nompC[3];nompC-GAL4	NOMPC:GFP	13365.8	0.99978
w*;nompC[3],UAS-NompC::GFP/nompC[3];nompC-GAL4	NOMPC:GFP	13380.7	0.99979
w*;nompC[3],UAS-NompC::GFP/nompC[3];nompC-GAL4	NOMPC:GFP	13395.5	0.99979
w*;nompC[3],UAS-NompC::GFP/nompC[3];nompC-GAL4	NOMPC:GFP	13410.4	0.99979
w*;nompC[3],UAS-NompC::GFP/nompC[3];nompC-GAL4	NOMPC:GFP	13425.2	0.99979
w*;nompC[3],UAS-NompC::GFP/nompC[3];nompC-GAL4	NOMPC:GFP	13440.1	0.99979
w*;nompC[3],UAS-NompC::GFP/nompC[3];nompC-GAL4	NOMPC:GFP	13454.9	0.9998
w*;nompC[3],UAS-NompC::GFP/nompC[3];nompC-GAL4	NOMPC:GFP	13469.8	0.9998
w*;nompC[3],UAS-NompC::GFP/nompC[3];nompC-GAL4	NOMPC:GFP	13484.6	0.9998
w*;nompC[3],UAS-NompC::GFP/nompC[3];nompC-GAL4	NOMPC:GFP	13499.5	0.9998
w*;nompC[3],UAS-NompC::GFP/nompC[3];nompC-GAL4	NOMPC:GFP	13514.3	0.9998
w*;nompC[3],UAS-NompC::GFP/nompC[3];nompC-GAL4	NOMPC:GFP	13529.2	0.9998
w*;nompC[3],UAS-NompC::GFP/nompC[3];nompC-GAL4	NOMPC:GFP	13544	0.99981
w*;nompC[3],UAS-NompC::GFP/nompC[3];nompC-GAL4	NOMPC:GFP	13558.9	0.99981
w*;nompC[3],UAS-NompC::GFP/nompC[3];nompC-GAL4	NOMPC:GFP	13642.2	0.99982
w*;nompC[3],UAS-NompC::GFP/nompC[3];nompC-GAL4	NOMPC:GFP	13851.6	0.99984
[truncated: 6,001 more rows]

## Sheet: Figure_2_a_to_d
genotype_long	genotype	animal	displacement_nm	norm_CAP
w*;nompC[1],UAS-AR+AR-NompC::GFP/nompC[3];nompC-GAL4	AR+AR-NOMPC:GFP	1	-12368.2	0.99178
w*;nompC[1],UAS-AR+AR-NompC::GFP/nompC[3];nompC-GAL4	AR+AR-NOMPC:GFP	1	-8692.2	1
w*;nompC[1],UAS-AR+AR-NompC::GFP/nompC[3];nompC-GAL4	AR+AR-NOMPC:GFP	1	-6850.23	0.9528
w*;nompC[1],UAS-AR+AR-NompC::GFP/nompC[3];nompC-GAL4	AR+AR-NOMPC:GFP	1	-3905.81	0.8125
w*;nompC[1],UAS-AR+AR-NompC::GFP/nompC[3];nompC-GAL4	AR+AR-NOMPC:GFP	1	-2821.91	0.6582
w*;nompC[1],UAS-AR+AR-NompC::GFP/nompC[3];nompC-GAL4	AR+AR-NOMPC:GFP	1	-2423.99	0.60032
w*;nompC[1],UAS-AR+AR-NompC::GFP/nompC[3];nompC-GAL4	AR+AR-NOMPC:GFP	1	-2009.8	0.5399
w*;nompC[1],UAS-AR+AR-NompC::GFP/nompC[3];nompC-GAL4	AR+AR-NOMPC:GFP	1	-1561.36	0.46361
w*;nompC[1],UAS-AR+AR-NompC::GFP/nompC[3];nompC-GAL4	AR+AR-NOMPC:GFP	1	-1078.97	0.36961
w*;nompC[1],UAS-AR+AR-NompC::GFP/nompC[3];nompC-GAL4	AR+AR-NOMPC:GFP	1	-532.641	0.22181
w*;nompC[1],UAS-AR+AR-NompC::GFP/nompC[3];nompC-GAL4	AR+AR-NOMPC:GFP	1	-299.456	0.08345
w*;nompC[1],UAS-AR+AR-NompC::GFP/nompC[3];nompC-GAL4	AR+AR-NOMPC:GFP	1	-157.992	0.01088
w*;nompC[1],UAS-AR+AR-NompC::GFP/nompC[3];nompC-GAL4	AR+AR-NOMPC:GFP	1	-84.9227	0
w*;nompC[1],UAS-AR+AR-NompC::GFP/nompC[3];nompC-GAL4	AR+AR-NOMPC:GFP	1	-40.3728	0.000748875
w*;nompC[1],UAS-AR+AR-NompC::GFP/nompC[3];nompC-GAL4	AR+AR-NOMPC:GFP	1	41.609	0
w*;nompC[1],UAS-AR+AR-NompC::GFP/nompC[3];nompC-GAL4	AR+AR-NOMPC:GFP	1	82.241	0.02533
w*;nompC[1],UAS-AR+AR-NompC::GFP/nompC[3];nompC-GAL4	AR+AR-NOMPC:GFP	1	157.646	0.09312
w*;nompC[1],UAS-AR+AR-NompC::GFP/nompC[3];nompC-GAL4	AR+AR-NOMPC:GFP	1	293.68	0.19787
w*;nompC[1],UAS-AR+AR-NompC::GFP/nompC[3];nompC-GAL4	AR+AR-NOMPC:GFP	1	522.463	0.30987
w*;nompC[1],UAS-AR+AR-NompC::GFP/nompC[3];nompC-GAL4	AR+AR-NOMPC:GFP	1	1067.62	0.41911
w*;nompC[1],UAS-AR+AR-NompC::GFP/nompC[3];nompC-GAL4	AR+AR-NOMPC:GFP	1	1547.01	0.47956
w*;nompC[1],UAS-AR+AR-NompC::GFP/nompC[3];nompC-GAL4	AR+AR-NOMPC:GFP	1	1983.65	0.51596
w*;nompC[1],UAS-AR+AR-NompC::GFP/nompC[3];nompC-GAL4	AR+AR-NOMPC:GFP	1	2380.82	0.56739
w*;nompC[1],UAS-AR+AR-NompC::GFP/nompC[3];nompC-GAL4	AR+AR-NOMPC:GFP	1	2779.99	0.60369
w*;nompC[1],UAS-AR+AR-NompC::GFP/nompC[3];nompC-GAL4	AR+AR-NOMPC:GFP	1	3829.84	0.70423
w*;nompC[1],UAS-AR+AR-NompC::GFP/nompC[3];nompC-GAL4	AR+AR-NOMPC:GFP	1	6680.49	0.8955
w*;nompC[1],UAS-AR+AR-NompC::GFP/nompC[3];nompC-GAL4	AR+AR-NOMPC:GFP	1	8453.23	1
w*;nompC[1],UAS-AR+AR-NompC::GFP/nompC[3];nompC-GAL4	AR+AR-NOMPC:GFP	1	11953.9	0.98853
w*;nompC[1],UAS-AR+AR-NompC::GFP/nompC[3];nompC-GAL4	AR+AR-NOMPC:GFP	2	-8427.87	0.91932
w*;nompC[1],UAS-AR+AR-NompC::GFP/nompC[3];nompC-GAL4	AR+AR-NOMPC:GFP	2	-5720.84	0.9345
w*;nompC[1],UAS-AR+AR-NompC::GFP/nompC[3];nompC-GAL4	AR+AR-NOMPC:GFP	2	-4325.52	0.99323
w*;nompC[1],UAS-AR+AR-NompC::GFP/nompC[3];nompC-GAL4	AR+AR-NOMPC:GFP	2	-2206.21	1
w*;nompC[1],UAS-AR+AR-NompC::GFP/nompC[3];nompC-GAL4	AR+AR-NOMPC:GFP	2	-1495.21	0.9257
w*;nompC[1],UAS-AR+AR-NompC::GFP/nompC[3];nompC-GAL4	AR+AR-NOMPC:GFP	2	-1221.59	0.8839
w*;nompC[1],UAS-AR+AR-NompC::GFP/nompC[3];nompC-GAL4	AR+AR-NOMPC:GFP	2	-978.939	0.85184
w*;nompC[1],UAS-AR+AR-NompC::GFP/nompC[3];nompC-GAL4	AR+AR-NOMPC:GFP	2	-733.706	0.81583
w*;nompC[1],UAS-AR+AR-NompC::GFP/nompC[3];nompC-GAL4	AR+AR-NOMPC:GFP	2	-448.008	0.74158
w*;nompC[1],UAS-AR+AR-NompC::GFP/nompC[3];nompC-GAL4	AR+AR-NOMPC:GFP	2	-217.17	0.51671
w*;nompC[1],UAS-AR+AR-NompC::GFP/nompC[3];nompC-GAL4	AR+AR-NOMPC:GFP	2	-122.888	0.26982
w*;nompC[1],UAS-AR+AR-NompC::GFP/nompC[3];nompC-GAL4	AR+AR-NOMPC:GFP	2	-69.8176	0.08697
w*;nompC[1],UAS-AR+AR-NompC::GFP/nompC[3];nompC-GAL4	AR+AR-NOMPC:GFP	2	-41.9853	0.01754
w*;nompC[1],UAS-AR+AR-NompC::GFP/nompC[3];nompC-GAL4	AR+AR-NOMPC:GFP	2	-28.3673	0
w*;nompC[1],UAS-AR+AR-NompC::GFP/nompC[3];nompC-GAL4	AR+AR-NOMPC:GFP	2	-1.8842	0
w*;nompC[1],UAS-AR+AR-NompC::GFP/nompC[3];nompC-GAL4	AR+AR-NOMPC:GFP	2	6.45794	0.000188989
w*;nompC[1],UAS-AR+AR-NompC::GFP/nompC[3];nompC-GAL4	AR+AR-NOMPC:GFP	2	31.5348	0.01783
w*;nompC[1],UAS-AR+AR-NompC::GFP/nompC[3];nompC-GAL4	AR+AR-NOMPC:GFP	2	85.1512	0.12658
w*;nompC[1],UAS-AR+AR-NompC::GFP/nompC[3];nompC-GAL4	AR+AR-NOMPC:GFP	2	182.514	0.37621
w*;nompC[1],UAS-AR+AR-NompC::GFP/nompC[3];nompC-GAL4	AR+AR-NOMPC:GFP	2	442.945	0.54518
w*;nompC[1],UAS-AR+AR-NompC::GFP/nompC[3];nompC-GAL4	AR+AR-NOMPC:GFP	2	693.385	0.61811
w*;nompC[1],UAS-AR+AR-NompC::GFP/nompC[3];nompC-GAL4	AR+AR-NOMPC:GFP	2	963.107	0.66167
w*;nompC[1],UAS-AR+AR-NompC::GFP/nompC[3];nompC-GAL4	AR+AR-NOMPC:GFP	2	1232.13	0.73161
w*;nompC[1],UAS-AR+AR-NompC::GFP/nompC[3];nompC-GAL4	AR+AR-NOMPC:GFP	2	1499.22	0.75129
w*;nompC[1],UAS-AR+AR-NompC::GFP/nompC[3];nompC-GAL4	AR+AR-NOMPC:GFP	2	2283.31	0.80877
w*;nompC[1],UAS-AR+AR-NompC::GFP/nompC[3];nompC-GAL4	AR+AR-NOMPC:GFP	2	4718.42	0.95075
w*;nompC[1],UAS-AR+AR-NompC::GFP/nompC[3];nompC-GAL4	AR+AR-NOMPC:GFP	2	6483.22	0.98687
w*;nompC[1],UAS-AR+AR-NompC::GFP/nompC[3];nompC-GAL4	AR+AR-NOMPC:GFP	2	10200.9	1
w*;nompC[1],UAS-AR+AR-NompC::GFP/nompC[3];nompC-GAL4	AR+AR-NOMPC:GFP	3	-11447.1	0.86844
w*;nompC[1],UAS-AR+AR-NompC::GFP/nompC[3];nompC-GAL4	AR+AR-NOMPC:GFP	3	-8245.81	0.97871
w*;nompC[1],UAS-AR+AR-NompC::GFP/nompC[3];nompC-GAL4	AR+AR-NOMPC:GFP	3	-6501.22	1
w*;nompC[1],UAS-AR+AR-NompC::GFP/nompC[3];nompC-GAL4	AR+AR-NOMPC:GFP	3	-3618.83	0.98118
w*;nompC[1],UAS-AR+AR-NompC::GFP/nompC[3];nompC-GAL4	AR+AR-NOMPC:GFP	3	-2585.42	0.94696
w*;nompC[1],UAS-AR+AR-NompC::GFP/nompC[3];nompC-GAL4	AR+AR-NOMPC:GFP	3	-2187.61	0.94443
w*;nompC[1],UAS-AR+AR-NompC::GFP/nompC[3];nompC-GAL4	AR+AR-NOMPC:GFP	3	-1792.1	0.90522
w*;nompC[1],UAS-AR+AR-NompC::GFP/nompC[3];nompC-GAL4	AR+AR-NOMPC:GFP	3	-1384.01	0.866
w*;nompC[1],UAS-AR+AR-NompC::GFP/nompC[3];nompC-GAL4	AR+AR-NOMPC:GFP	3	-923.829	0.74202
w*;nompC[1],UAS-AR+AR-NompC::GFP/nompC[3];nompC-GAL4	AR+AR-NOMPC:GFP	3	-412.626	0.40516
w*;nompC[1],UAS-AR+AR-NompC::GFP/nompC[3];nompC-GAL4	AR+AR-NOMPC:GFP	3	-202.853	0.08785
w*;nompC[1],UAS-AR+AR-NompC::GFP/nompC[3];nompC-GAL4	AR+AR-NOMPC:GFP	3	-78.7628	0.000923655
w*;nompC[1],UAS-AR+AR-NompC::GFP/nompC[3];nompC-GAL4	AR+AR-NOMPC:GFP	3	-21.0157	0.000327852
w*;nompC[1],UAS-AR+AR-NompC::GFP/nompC[3];nompC-GAL4	AR+AR-NOMPC:GFP	3	-2.02331	0
w*;nompC[1],UAS-AR+AR-NompC::GFP/nompC[3];nompC-GAL4	AR+AR-NOMPC:GFP	3	71.2504	0
w*;nompC[1],UAS-AR+AR-NompC::GFP/nompC[3];nompC-GAL4	AR+AR-NOMPC:GFP	3	106.659	0.02888
w*;nompC[1],UAS-AR+AR-NompC::GFP/nompC[3];nompC-GAL4	AR+AR-NOMPC:GFP	3	181.424	0.12413
w*;nompC[1],UAS-AR+AR-NompC::GFP/nompC[3];nompC-GAL4	AR+AR-NOMPC:GFP	3	304.851	0.32135
w*;nompC[1],UAS-AR+AR-NompC::GFP/nompC[3];nompC-GAL4	AR+AR-NOMPC:GFP	3	505.885	0.5222
w*;nompC[1],UAS-AR+AR-NompC::GFP/nompC[3];nompC-GAL4	AR+AR-NOMPC:GFP	3	979.508	0.68953
w*;nompC[1],UAS-AR+AR-NompC::GFP/nompC[3];nompC-GAL4	AR+AR-NOMPC:GFP	3	1436.8	0.79531
w*;nompC[1],UAS-AR+AR-NompC::GFP/nompC[3];nompC-GAL4	AR+AR-NOMPC:GFP	3	1862.28	0.84526
w*;nompC[1],UAS-AR+AR-NompC::GFP/nompC[3];nompC-GAL4	AR+AR-NOMPC:GFP	3	2270.15	0.89027
w*;nompC[1],UAS-AR+AR-NompC::GFP/nompC[3];nompC-GAL4	AR+AR-NOMPC:GFP	3	2672.9	0.90563
w*;nompC[1],UAS-AR+AR-NompC::GFP/nompC[3];nompC-GAL4	AR+AR-NOMPC:GFP	3	3744.8	0.96268
w*;nompC[1],UAS-AR+AR-NompC::GFP/nompC[3];nompC-GAL4	AR+AR-NOMPC:GFP	3	6850.8	0.9569
w*;nompC[1],UAS-AR+AR-NompC::GFP/nompC[3];nompC-GAL4	AR+AR-NOMPC:GFP	3	8916.66	1
w*;nompC[1],UAS-AR+AR-NompC::GFP/nompC[3];nompC-GAL4	AR+AR-NOMPC:GFP	3	12821.3	0.96613
w*;nompC[1],UAS-AR+AR-NompC::GFP/nompC[3];nompC-GAL4	AR+AR-NOMPC:GFP	4	-11875.7	1
w*;nompC[1],UAS-AR+AR-NompC::GFP/nompC[3];nompC-GAL4	AR+AR-NOMPC:GFP	4	-8377.7	0.98821
w*;nompC[1],UAS-AR+AR-NompC::GFP/nompC[3];nompC-GAL4	AR+AR-NOMPC:GFP	4	-6526.75	0.96261
w*;nompC[1],UAS-AR+AR-NompC::GFP/nompC[3];nompC-GAL4	AR+AR-NOMPC:GFP	4	-3596.51	0.84295
w*;nompC[1],UAS-AR+AR-NompC::GFP/nompC[3];nompC-GAL4	AR+AR-NOMPC:GFP	4	-2530.09	0.75162
w*;nompC[1],UAS-AR+AR-NompC::GFP/nompC[3];nompC-GAL4	AR+AR-NOMPC:GFP	4	-2131.14	0.70797
w*;nompC[1],UAS-AR+AR-NompC::GFP/nompC[3];nompC-GAL4	AR+AR-NOMPC:GFP	4	-1741.27	0.65727
w*;nompC[1],UAS-AR+AR-NompC::GFP/nompC[3];nompC-GAL4	AR+AR-NOMPC:GFP	4	-1323.91	0.59421
w*;nompC[1],UAS-AR+AR-NompC::GFP/nompC[3];nompC-GAL4	AR+AR-NOMPC:GFP	4	-877.39	0.49047
w*;nompC[1],UAS-AR+AR-NompC::GFP/nompC[3];nompC-GAL4	AR+AR-NOMPC:GFP	4	-375.543	0.28076
w*;nompC[1],UAS-AR+AR-NompC::GFP/nompC[3];nompC-GAL4	AR+AR-NOMPC:GFP	4	-177.567	0.05895
w*;nompC[1],UAS-AR+AR-NompC::GFP/nompC[3];nompC-GAL4	AR+AR-NOMPC:GFP	4	-71.0788	0.00428
w*;nompC[1],UAS-AR+AR-NompC::GFP/nompC[3];nompC-GAL4	AR+AR-NOMPC:GFP	4	-15.0179	0.000859418
w*;nompC[1],UAS-AR+AR-NompC::GFP/nompC[3];nompC-GAL4	AR+AR-NOMPC:GFP	4	-0.93031	0
w*;nompC[1],UAS-AR+AR-NompC::GFP/nompC[3];nompC-GAL4	AR+AR-NOMPC:GFP	4	61.6991	0
w*;nompC[1],UAS-AR+AR-NompC::GFP/nompC[3];nompC-GAL4	AR+AR-NOMPC:GFP	4	91.3039	0.01367
w*;nompC[1],UAS-AR+AR-NompC::GFP/nompC[3];nompC-GAL4	AR+AR-NOMPC:GFP	4	155.096	0.06938
w*;nompC[1],UAS-AR+AR-NompC::GFP/nompC[3];nompC-GAL4	AR+AR-NOMPC:GFP	4	266.31	0.20911
w*;nompC[1],UAS-AR+AR-NompC::GFP/nompC[3];nompC-GAL4	AR+AR-NOMPC:GFP	4	467.735	0.3833
w*;nompC[1],UAS-AR+AR-NompC::GFP/nompC[3];nompC-GAL4	AR+AR-NOMPC:GFP	4	951.169	0.55658
w*;nompC[1],UAS-AR+AR-NompC::GFP/nompC[3];nompC-GAL4	AR+AR-NOMPC:GFP	4	1406.49	0.6271
w*;nompC[1],UAS-AR+AR-NompC::GFP/nompC[3];nompC-GAL4	AR+AR-NOMPC:GFP	4	1846.72	0.67879
w*;nompC[1],UAS-AR+AR-NompC::GFP/nompC[3];nompC-GAL4	AR+AR-NOMPC:GFP	4	2273.27	0.73024
w*;nompC[1],UAS-AR+AR-NompC::GFP/nompC[3];nompC-GAL4	AR+AR-NOMPC:GFP	4	2693.17	0.75466
w*;nompC[1],UAS-AR+AR-NompC::GFP/nompC[3];nompC-GAL4	AR+AR-NOMPC:GFP	4	3845.53	0.83047
w*;nompC[1],UAS-AR+AR-NompC::GFP/nompC[3];nompC-GAL4	AR+AR-NOMPC:GFP	4	7125.95	0.93824
w*;nompC[1],UAS-AR+AR-NompC::GFP/nompC[3];nompC-GAL4	AR+AR-NOMPC:GFP	4	9301.91	0.97505
w*;nompC[1],UAS-AR+AR-NompC::GFP/nompC[3];nompC-GAL4	AR+AR-NOMPC:GFP	4	13805.2	1
w*;nompC[1],UAS-AR+AR-NompC::GFP/nompC[3];nompC-GAL4	AR+AR-NOMPC:GFP	5	-11824.9	0.99178
w*;nompC[1],UAS-AR+AR-NompC::GFP/nompC[3];nompC-GAL4	AR+AR-NOMPC:GFP	5	-8387.12	1
w*;nompC[1],UAS-AR+AR-NompC::GFP/nompC[3];nompC-GAL4	AR+AR-NOMPC:GFP	5	-6654.03	0.9528
w*;nompC[1],UAS-AR+AR-NompC::GFP/nompC[3];nompC-GAL4	AR+AR-NOMPC:GFP	5	-3700.81	0.8125
w*;nompC[1],UAS-AR+AR-NompC::GFP/nompC[3];nompC-GAL4	AR+AR-NOMPC:GFP	5	-2663.55	0.6582
w*;nompC[1],UAS-AR+AR-NompC::GFP/nompC[3];nompC-GAL4	AR+AR-NOMPC:GFP	5	-2253.57	0.60032
w*;nompC[1],UAS-AR+AR-NompC::GFP/nompC[3];nompC-GAL4	AR+AR-NOMPC:GFP	5	-1876.59	0.5399
w*;nompC[1],UAS-AR+AR-NompC::GFP/nompC[3];nompC-GAL4	AR+AR-NOMPC:GFP	5	-1424.25	0.46361
w*;nompC[1],UAS-AR+AR-NompC::GFP/nompC[3];nompC-GAL4	AR+AR-NOMPC:GFP	5	-955.053	0.36961
w*;nompC[1],UAS-AR+AR-NompC::GFP/nompC[3];nompC-GAL4	AR+AR-NOMPC:GFP	5	-435.464	0.22181
w*;nompC[1],UAS-AR+AR-NompC::GFP/nompC[3];nompC-GAL4	AR+AR-NOMPC:GFP	5	-220.741	0.08345
w*;nompC[1],UAS-AR+AR-NompC::GFP/nompC[3];nompC-GAL4	AR+AR-NOMPC:GFP	5	-88.4335	0.01088
w*;nompC[1],UAS-AR+AR-NompC::GFP/nompC[3];nompC-GAL4	AR+AR-NOMPC:GFP	5	-21.0542	0
w*;nompC[1],UAS-AR+AR-NompC::GFP/nompC[3];nompC-GAL4	AR+AR-NOMPC:GFP	5	-9.72396	0.000748875
w*;nompC[1],UAS-AR+AR-NompC::GFP/nompC[3];nompC-GAL4	AR+AR-NOMPC:GFP	5	82.9605	0
w*;nompC[1],UAS-AR+AR-NompC::GFP/nompC[3];nompC-GAL4	AR+AR-NOMPC:GFP	5	121.054	0.02533
w*;nompC[1],UAS-AR+AR-NompC::GFP/nompC[3];nompC-GAL4	AR+AR-NOMPC:GFP	5	200.745	0.09312
w*;nompC[1],UAS-AR+AR-NompC::GFP/nompC[3];nompC-GAL4	AR+AR-NOMPC:GFP	5	320.982	0.19787
w*;nompC[1],UAS-AR+AR-NompC::GFP/nompC[3];nompC-GAL4	AR+AR-NOMPC:GFP	5	526.635	0.30987
w*;nompC[1],UAS-AR+AR-NompC::GFP/nompC[3];nompC-GAL4	AR+AR-NOMPC:GFP	5	1024.95	0.41911
w*;nompC[1],UAS-AR+AR-NompC::GFP/nompC[3];nompC-GAL4	AR+AR-NOMPC:GFP	5	1480.98	0.47956
w*;nompC[1],UAS-AR+AR-NompC::GFP/nompC[3];nompC-GAL4	AR+AR-NOMPC:GFP	5	1921.25	0.51596
w*;nompC[1],UAS-AR+AR-NompC::GFP/nompC[3];nompC-GAL4	AR+AR-NOMPC:GFP	5	2318.93	0.56739
w*;nompC[1],UAS-AR+AR-NompC::GFP/nompC[3];nompC-GAL4	AR+AR-NOMPC:GFP	5	2711.71	0.60369
w*;nompC[1],UAS-AR+AR-NompC::GFP/nompC[3];nompC-GAL4	AR+AR-NOMPC:GFP	5	3795.26	0.70423
w*;nompC[1],UAS-AR+AR-NompC::GFP/nompC[3];nompC-GAL4	AR+AR-NOMPC:GFP	5	6714.15	0.8955
w*;nompC[1],UAS-AR+AR-NompC::GFP/nompC[3];nompC-GAL4	AR+AR-NOMPC:GFP	5	8642.38	1
w*;nompC[1],UAS-AR+AR-NompC::GFP/nompC[3];nompC-GAL4	AR+AR-NOMPC:GFP	5	12216	0.98853
w*;nompC[1],UAS-AR+AR-NompC::GFP/nompC[3];nompC-GAL4	AR+AR-NOMPC:GFP	6	-13108.2	1
w*;nompC[1],UAS-AR+AR-NompC::GFP/nompC[3];nompC-GAL4	AR+AR-NOMPC:GFP	6	-9637.93	0.88383
w*;nompC[1],UAS-AR+AR-NompC::GFP/nompC[3];nompC-GAL4	AR+AR-NOMPC:GFP	6	-7825.02	0.85989
w*;nompC[1],UAS-AR+AR-NompC::GFP/nompC[3];nompC-GAL4	AR+AR-NOMPC:GFP	6	-4560.31	0.76275
w*;nompC[1],UAS-AR+AR-NompC::GFP/nompC[3];nompC-GAL4	AR+AR-NOMPC:GFP	6	-3219.93	0.73188
w*;nompC[1],UAS-AR+AR-NompC::GFP/nompC[3];nompC-GAL4	AR+AR-NOMPC:GFP	6	-2739.47	0.71242
w*;nompC[1],UAS-AR+AR-NompC::GFP/nompC[3];nompC-GAL4	AR+AR-NOMPC:GFP	6	-2362.47	0.66396
w*;nompC[1],UAS-AR+AR-NompC::GFP/nompC[3];nompC-GAL4	AR+AR-NOMPC:GFP	6	-1817.8	0.59831
w*;nompC[1],UAS-AR+AR-NompC::GFP/nompC[3];nompC-GAL4	AR+AR-NOMPC:GFP	6	-1252.36	0.4111
w*;nompC[1],UAS-AR+AR-NompC::GFP/nompC[3];nompC-GAL4	AR+AR-NOMPC:GFP	6	-578.365	0.2542
w*;nompC[1],UAS-AR+AR-NompC::GFP/nompC[3];nompC-GAL4	AR+AR-NOMPC:GFP	6	-311.878	0.13253
w*;nompC[1],UAS-AR+AR-NompC::GFP/nompC[3];nompC-GAL4	AR+AR-NOMPC:GFP	6	-130.256	0.0261
w*;nompC[1],UAS-AR+AR-NompC::GFP/nompC[3];nompC-GAL4	AR+AR-NOMPC:GFP	6	-32.9993	0.00206
w*;nompC[1],UAS-AR+AR-NompC::GFP/nompC[3];nompC-GAL4	AR+AR-NOMPC:GFP	6	1.45766	0
w*;nompC[1],UAS-AR+AR-NompC::GFP/nompC[3];nompC-GAL4	AR+AR-NOMPC:GFP	6	123.144	0
w*;nompC[1],UAS-AR+AR-NompC::GFP/nompC[3];nompC-GAL4	AR+AR-NOMPC:GFP	6	177.216	0.03182
w*;nompC[1],UAS-AR+AR-NompC::GFP/nompC[3];nompC-GAL4	AR+AR-NOMPC:GFP	6	285.923	0.12376
w*;nompC[1],UAS-AR+AR-NompC::GFP/nompC[3];nompC-GAL4	AR+AR-NOMPC:GFP	6	452.606	0.2339
w*;nompC[1],UAS-AR+AR-NompC::GFP/nompC[3];nompC-GAL4	AR+AR-NOMPC:GFP	6	709.98	0.36729
w*;nompC[1],UAS-AR+AR-NompC::GFP/nompC[3];nompC-GAL4	AR+AR-NOMPC:GFP	6	1345.43	0.49845
w*;nompC[1],UAS-AR+AR-NompC::GFP/nompC[3];nompC-GAL4	AR+AR-NOMPC:GFP	6	1919.11	0.58915
w*;nompC[1],UAS-AR+AR-NompC::GFP/nompC[3];nompC-GAL4	AR+AR-NOMPC:GFP	6	2449.29	0.62471
w*;nompC[1],UAS-AR+AR-NompC::GFP/nompC[3];nompC-GAL4	AR+AR-NOMPC:GFP	6	2934.79	0.66904
w*;nompC[1],UAS-AR+AR-NompC::GFP/nompC[3];nompC-GAL4	AR+AR-NOMPC:GFP	6	3401.17	0.7052
w*;nompC[1],UAS-AR+AR-NompC::GFP/nompC[3];nompC-GAL4	AR+AR-NOMPC:GFP	6	4820.08	0.76457
w*;nompC[1],UAS-AR+AR-NompC::GFP/nompC[3];nompC-GAL4	AR+AR-NOMPC:GFP	6	8998.78	0.87197
w*;nompC[1],UAS-AR+AR-NompC::GFP/nompC[3];nompC-GAL4	AR+AR-NOMPC:GFP	6	11323.7	0.90728
w*;nompC[1],UAS-AR+AR-NompC::GFP/nompC[3];nompC-GAL4	AR+AR-NOMPC:GFP	6	17163.5	1
w*;nompC[1],UAS-AR+AR-NompC::GFP/nompC[3];nompC-GAL4	AR+AR-NOMPC:GFP	7	-12742.2	1
w*;nompC[1],UAS-AR+AR-NompC::GFP/nompC[3];nompC-GAL4	AR+AR-NOMPC:GFP	7	-9029.84	0.94009
w*;nompC[1],UAS-AR+AR-NompC::GFP/nompC[3];nompC-GAL4	AR+AR-NOMPC:GFP	7	-7155.67	0.95459
w*;nompC[1],UAS-AR+AR-NompC::GFP/nompC[3];nompC-GAL4	AR+AR-NOMPC:GFP	7	-4114.76	0.91278
w*;nompC[1],UAS-AR+AR-NompC::GFP/nompC[3];nompC-GAL4	AR+AR-NOMPC:GFP	7	-2990.5	0.89475
w*;nompC[1],UAS-AR+AR-NompC::GFP/nompC[3];nompC-GAL4	AR+AR-NOMPC:GFP	7	-2563.26	0.84588
w*;nompC[1],UAS-AR+AR-NompC::GFP/nompC[3];nompC-GAL4	AR+AR-NOMPC:GFP	7	-2116.61	0.79209
w*;nompC[1],UAS-AR+AR-NompC::GFP/nompC[3];nompC-GAL4	AR+AR-NOMPC:GFP	7	-1654.88	0.72435
w*;nompC[1],UAS-AR+AR-NompC::GFP/nompC[3];nompC-GAL4	AR+AR-NOMPC:GFP	7	-1149.82	0.63343
w*;nompC[1],UAS-AR+AR-NompC::GFP/nompC[3];nompC-GAL4	AR+AR-NOMPC:GFP	7	-569.692	0.42009
w*;nompC[1],UAS-AR+AR-NompC::GFP/nompC[3];nompC-GAL4	AR+AR-NOMPC:GFP	7	-327.315	0.20553
w*;nompC[1],UAS-AR+AR-NompC::GFP/nompC[3];nompC-GAL4	AR+AR-NOMPC:GFP	7	-176.449	0.05387
w*;nompC[1],UAS-AR+AR-NompC::GFP/nompC[3];nompC-GAL4	AR+AR-NOMPC:GFP	7	-95.9101	0.00691
w*;nompC[1],UAS-AR+AR-NompC::GFP/nompC[3];nompC-GAL4	AR+AR-NOMPC:GFP	7	-44.5159	0
w*;nompC[1],UAS-AR+AR-NompC::GFP/nompC[3];nompC-GAL4	AR+AR-NOMPC:GFP	7	46.6418	0
w*;nompC[1],UAS-AR+AR-NompC::GFP/nompC[3];nompC-GAL4	AR+AR-NOMPC:GFP	7	91.6555	0.0106
w*;nompC[1],UAS-AR+AR-NompC::GFP/nompC[3];nompC-GAL4	AR+AR-NOMPC:GFP	7	176.277	0.08223
w*;nompC[1],UAS-AR+AR-NompC::GFP/nompC[3];nompC-GAL4	AR+AR-NOMPC:GFP	7	326.058	0.18352
w*;nompC[1],UAS-AR+AR-NompC::GFP/nompC[3];nompC-GAL4	AR+AR-NOMPC:GFP	7	564.827	0.34094
w*;nompC[1],UAS-AR+AR-NompC::GFP/nompC[3];nompC-GAL4	AR+AR-NOMPC:GFP	7	1133.94	0.49527
w*;nompC[1],UAS-AR+AR-NompC::GFP/nompC[3];nompC-GAL4	AR+AR-NOMPC:GFP	7	1627.45	0.58641
w*;nompC[1],UAS-AR+AR-NompC::GFP/nompC[3];nompC-GAL4	AR+AR-NOMPC:GFP	7	2076.75	0.66748
w*;nompC[1],UAS-AR+AR-NompC::GFP/nompC[3];nompC-GAL4	AR+AR-NOMPC:GFP	7	2506.66	0.70825
w*;nompC[1],UAS-AR+AR-NompC::GFP/nompC[3];nompC-GAL4	AR+AR-NOMPC:GFP	7	2918.8	0.74657
w*;nompC[1],UAS-AR+AR-NompC::GFP/nompC[3];nompC-GAL4	AR+AR-NOMPC:GFP	7	4038.58	0.85228
w*;nompC[1],UAS-AR+AR-NompC::GFP/nompC[3];nompC-GAL4	AR+AR-NOMPC:GFP	7	7073.25	0.985
w*;nompC[1],UAS-AR+AR-NompC::GFP/nompC[3];nompC-GAL4	AR+AR-NOMPC:GFP	7	8957.58	0.94741
w*;nompC[1],UAS-AR+AR-NompC::GFP/nompC[3];nompC-GAL4	AR+AR-NOMPC:GFP	7	12723.8	1
w*;nompC[3],UAS-LH+LH-NompC::GFP/nompC[3];nompC-GAL4	LH+LH-NOMPC:GFP	1	-8289.99	0.94288
w*;nompC[3],UAS-LH+LH-NompC::GFP/nompC[3];nompC-GAL4	LH+LH-NOMPC:GFP	1	-6305.62	1
w*;nompC[3],UAS-LH+LH-NompC::GFP/nompC[3];nompC-GAL4	LH+LH-NOMPC:GFP	1	-3223.92	0.77872
w*;nompC[3],UAS-LH+LH-NompC::GFP/nompC[3];nompC-GAL4	LH+LH-NOMPC:GFP	1	-2168.65	0.47604
w*;nompC[3],UAS-LH+LH-NompC::GFP/nompC[3];nompC-GAL4	LH+LH-NOMPC:GFP	1	-1803.41	0.37176
w*;nompC[3],UAS-LH+LH-NompC::GFP/nompC[3];nompC-GAL4	LH+LH-NOMPC:GFP	1	-1433.66	0.19598
w*;nompC[3],UAS-LH+LH-NompC::GFP/nompC[3];nompC-GAL4	LH+LH-NOMPC:GFP	1	-1052.15	0.10252
w*;nompC[3],UAS-LH+LH-NompC::GFP/nompC[3];nompC-GAL4	LH+LH-NOMPC:GFP	1	-684.109	0.03966
w*;nompC[3],UAS-LH+LH-NompC::GFP/nompC[3];nompC-GAL4	LH+LH-NOMPC:GFP	1	-292.939	0.00332
w*;nompC[3],UAS-LH+LH-NompC::GFP/nompC[3];nompC-GAL4	LH+LH-NOMPC:GFP	1	-153.294	0
w*;nompC[3],UAS-LH+LH-NompC::GFP/nompC[3];nompC-GAL4	LH+LH-NOMPC:GFP	1	-85.999	0.00454
w*;nompC[3],UAS-LH+LH-NompC::GFP/nompC[3];nompC-GAL4	LH+LH-NOMPC:GFP	1	-49.927	0.00384
w*;nompC[3],UAS-LH+LH-NompC::GFP/nompC[3];nompC-GAL4	LH+LH-NOMPC:GFP	1	-34.2449	0.00458
w*;nompC[3],UAS-LH+LH-NompC::GFP/nompC[3];nompC-GAL4	LH+LH-NOMPC:GFP	1	2.58831	0
w*;nompC[3],UAS-LH+LH-NompC::GFP/nompC[3];nompC-GAL4	LH+LH-NOMPC:GFP	1	20.9746	0.00464
w*;nompC[3],UAS-LH+LH-NompC::GFP/nompC[3];nompC-GAL4	LH+LH-NOMPC:GFP	1	56.1671	0.00616
w*;nompC[3],UAS-LH+LH-NompC::GFP/nompC[3];nompC-GAL4	LH+LH-NOMPC:GFP	1	126.866	0.0095
w*;nompC[3],UAS-LH+LH-NompC::GFP/nompC[3];nompC-GAL4	LH+LH-NOMPC:GFP	1	263.927	0.02034
w*;nompC[3],UAS-LH+LH-NompC::GFP/nompC[3];nompC-GAL4	LH+LH-NOMPC:GFP	1	653.956	0.07872
w*;nompC[3],UAS-LH+LH-NompC::GFP/nompC[3];nompC-GAL4	LH+LH-NOMPC:GFP	1	1036.74	0.14446
w*;nompC[3],UAS-LH+LH-NompC::GFP/nompC[3];nompC-GAL4	LH+LH-NOMPC:GFP	1	1405.86	0.22822
w*;nompC[3],UAS-LH+LH-NompC::GFP/nompC[3];nompC-GAL4	LH+LH-NOMPC:GFP	1	1768.27	0.33774
w*;nompC[3],UAS-LH+LH-NompC::GFP/nompC[3];nompC-GAL4	LH+LH-NOMPC:GFP	1	2119.45	0.44212
w*;nompC[3],UAS-LH+LH-NompC::GFP/nompC[3];nompC-GAL4	LH+LH-NOMPC:GFP	1	3147.94	0.70274
w*;nompC[3],UAS-LH+LH-NompC::GFP/nompC[3];nompC-GAL4	LH+LH-NOMPC:GFP	1	6116.37	0.90762
w*;nompC[3],UAS-LH+LH-NompC::GFP/nompC[3];nompC-GAL4	LH+LH-NOMPC:GFP	1	8027.1	0.9831
w*;nompC[3],UAS-LH+LH-NompC::GFP/nompC[3];nompC-GAL4	LH+LH-NOMPC:GFP	1	11918.6	1
w*;nompC[3],UAS-LH+LH-NompC::GFP/nompC[3];nompC-GAL4	LH+LH-NOMPC:GFP	2	-7483.99	1
w*;nompC[3],UAS-LH+LH-NompC::GFP/nompC[3];nompC-GAL4	LH+LH-NOMPC:GFP	2	-5313.86	0.87966
w*;nompC[3],UAS-LH+LH-NompC::GFP/nompC[3];nompC-GAL4	LH+LH-NOMPC:GFP	2	-4110.83	0.77154
w*;nompC[3],UAS-LH+LH-NompC::GFP/nompC[3];nompC-GAL4	LH+LH-NOMPC:GFP	2	-2192.5	0.41964
w*;nompC[3],UAS-LH+LH-NompC::GFP/nompC[3];nompC-GAL4	LH+LH-NOMPC:GFP	2	-1505.16	0.2071
w*;nompC[3],UAS-LH+LH-NompC::GFP/nompC[3];nompC-GAL4	LH+LH-NOMPC:GFP	2	-1247.43	0.15162
w*;nompC[3],UAS-LH+LH-NompC::GFP/nompC[3];nompC-GAL4	LH+LH-NOMPC:GFP	2	-996.126	0.08944
w*;nompC[3],UAS-LH+LH-NompC::GFP/nompC[3];nompC-GAL4	LH+LH-NOMPC:GFP	2	-744.45	0.0547
w*;nompC[3],UAS-LH+LH-NompC::GFP/nompC[3];nompC-GAL4	LH+LH-NOMPC:GFP	2	-476.327	0.03776
w*;nompC[3],UAS-LH+LH-NompC::GFP/nompC[3];nompC-GAL4	LH+LH-NOMPC:GFP	2	-211.457	0.00452
w*;nompC[3],UAS-LH+LH-NompC::GFP/nompC[3];nompC-GAL4	LH+LH-NOMPC:GFP	2	-117.783	0.00306
w*;nompC[3],UAS-LH+LH-NompC::GFP/nompC[3];nompC-GAL4	LH+LH-NOMPC:GFP	2	-67.0036	0.00346
w*;nompC[3],UAS-LH+LH-NompC::GFP/nompC[3];nompC-GAL4	LH+LH-NOMPC:GFP	2	-39.0213	0.00192
w*;nompC[3],UAS-LH+LH-NompC::GFP/nompC[3];nompC-GAL4	LH+LH-NOMPC:GFP	2	-25.7058	0
w*;nompC[3],UAS-LH+LH-NompC::GFP/nompC[3];nompC-GAL4	LH+LH-NOMPC:GFP	2	5.75605	0
w*;nompC[3],UAS-LH+LH-NompC::GFP/nompC[3];nompC-GAL4	LH+LH-NOMPC:GFP	2	30.857	0.00122
w*;nompC[3],UAS-LH+LH-NompC::GFP/nompC[3];nompC-GAL4	LH+LH-NOMPC:GFP	2	78.9611	0.00814
w*;nompC[3],UAS-LH+LH-NompC::GFP/nompC[3];nompC-GAL4	LH+LH-NOMPC:GFP	2	170.324	0.00468
w*;nompC[3],UAS-LH+LH-NompC::GFP/nompC[3];nompC-GAL4	LH+LH-NOMPC:GFP	2	442.877	0.0098
w*;nompC[3],UAS-LH+LH-NompC::GFP/nompC[3];nompC-GAL4	LH+LH-NOMPC:GFP	2	709.659	0.02554
w*;nompC[3],UAS-LH+LH-NompC::GFP/nompC[3];nompC-GAL4	LH+LH-NOMPC:GFP	2	976.517	0.03366
w*;nompC[3],UAS-LH+LH-NompC::GFP/nompC[3];nompC-GAL4	LH+LH-NOMPC:GFP	2	1248.94	0.10918
w*;nompC[3],UAS-LH+LH-NompC::GFP/nompC[3];nompC-GAL4	LH+LH-NOMPC:GFP	2	1494.3	0.1508
w*;nompC[3],UAS-LH+LH-NompC::GFP/nompC[3];nompC-GAL4	LH+LH-NOMPC:GFP	2	2232.18	0.22216
w*;nompC[3],UAS-LH+LH-NompC::GFP/nompC[3];nompC-GAL4	LH+LH-NOMPC:GFP	2	5719.61	0.795
w*;nompC[3],UAS-LH+LH-NompC::GFP/nompC[3];nompC-GAL4	LH+LH-NOMPC:GFP	2	8425.3	1
w*;nompC[3],UAS-LH+LH-NompC::GFP/nompC[3];nompC-GAL4	LH+LH-NOMPC:GFP	3	-8272.01	1
w*;nompC[3],UAS-LH+LH-NompC::GFP/nompC[3];nompC-GAL4	LH+LH-NOMPC:GFP	3	-6441.52	0.89212
w*;nompC[3],UAS-LH+LH-NompC::GFP/nompC[3];nompC-GAL4	LH+LH-NOMPC:GFP	3	-3449.67	0.49068
w*;nompC[3],UAS-LH+LH-NompC::GFP/nompC[3];nompC-GAL4	LH+LH-NOMPC:GFP	3	-2365.21	0.27192
w*;nompC[3],UAS-LH+LH-NompC::GFP/nompC[3];nompC-GAL4	LH+LH-NOMPC:GFP	3	-1970.67	0.20388
w*;nompC[3],UAS-LH+LH-NompC::GFP/nompC[3];nompC-GAL4	LH+LH-NOMPC:GFP	3	-1568.49	0.1349
w*;nompC[3],UAS-LH+LH-NompC::GFP/nompC[3];nompC-GAL4	LH+LH-NOMPC:GFP	3	-1155.99	0.0712
w*;nompC[3],UAS-LH+LH-NompC::GFP/nompC[3];nompC-GAL4	LH+LH-NOMPC:GFP	3	-729.496	0.02136
w*;nompC[3],UAS-LH+LH-NompC::GFP/nompC[3];nompC-GAL4	LH+LH-NOMPC:GFP	3	-283.262	0.02952
w*;nompC[3],UAS-LH+LH-NompC::GFP/nompC[3];nompC-GAL4	LH+LH-NOMPC:GFP	3	-129.155	0.00338
w*;nompC[3],UAS-LH+LH-NompC::GFP/nompC[3];nompC-GAL4	LH+LH-NOMPC:GFP	3	-49.48	0.00352
w*;nompC[3],UAS-LH+LH-NompC::GFP/nompC[3];nompC-GAL4	LH+LH-NOMPC:GFP	3	-13.0735	0.00114
w*;nompC[3],UAS-LH+LH-NompC::GFP/nompC[3];nompC-GAL4	LH+LH-NOMPC:GFP	3	4.14833	0
w*;nompC[3],UAS-LH+LH-NompC::GFP/nompC[3];nompC-GAL4	LH+LH-NOMPC:GFP	3	43.8807	0
w*;nompC[3],UAS-LH+LH-NompC::GFP/nompC[3];nompC-GAL4	LH+LH-NOMPC:GFP	3	65.2475	0.0042
w*;nompC[3],UAS-LH+LH-NompC::GFP/nompC[3];nompC-GAL4	LH+LH-NOMPC:GFP	3	111.981	0.00538
w*;nompC[3],UAS-LH+LH-NompC::GFP/nompC[3];nompC-GAL4	LH+LH-NOMPC:GFP	3	195.944	0.00414
w*;nompC[3],UAS-LH+LH-NompC::GFP/nompC[3];nompC-GAL4	LH+LH-NOMPC:GFP	3	357.732	0.01946
w*;nompC[3],UAS-LH+LH-NompC::GFP/nompC[3];nompC-GAL4	LH+LH-NOMPC:GFP	3	790.75	0.0565
w*;nompC[3],UAS-LH+LH-NompC::GFP/nompC[3];nompC-GAL4	LH+LH-NOMPC:GFP	3	1234.62	0.10556
w*;nompC[3],UAS-LH+LH-NompC::GFP/nompC[3];nompC-GAL4	LH+LH-NOMPC:GFP	3	1656.66	0.1528
w*;nompC[3],UAS-LH+LH-NompC::GFP/nompC[3];nompC-GAL4	LH+LH-NOMPC:GFP	3	2070.44	0.2243
w*;nompC[3],UAS-LH+LH-NompC::GFP/nompC[3];nompC-GAL4	LH+LH-NOMPC:GFP	3	2493.38	0.26656
w*;nompC[3],UAS-LH+LH-NompC::GFP/nompC[3];nompC-GAL4	LH+LH-NOMPC:GFP	3	3636.66	0.44266
w*;nompC[3],UAS-LH+LH-NompC::GFP/nompC[3];nompC-GAL4	LH+LH-NOMPC:GFP	3	6944.16	0.78418
w*;nompC[3],UAS-LH+LH-NompC::GFP/nompC[3];nompC-GAL4	LH+LH-NOMPC:GFP	3	9074.9	0.88614
w*;nompC[3],UAS-LH+LH-NompC::GFP/nompC[3];nompC-GAL4	LH+LH-NOMPC:GFP	3	13294.5	1
w*;nompC[3],UAS-LH+LH-NompC::GFP/nompC[3];nompC-GAL4	LH+LH-NOMPC:GFP	4	-13219.6	1
w*;nompC[3],UAS-LH+LH-NompC::GFP/nompC[3];nompC-GAL4	LH+LH-NOMPC:GFP	4	-9222.18	0.91336
w*;nompC[3],UAS-LH+LH-NompC::GFP/nompC[3];nompC-GAL4	LH+LH-NOMPC:GFP	4	-7108.57	0.91274
w*;nompC[3],UAS-LH+LH-NompC::GFP/nompC[3];nompC-GAL4	LH+LH-NOMPC:GFP	4	-3744.87	0.627
w*;nompC[3],UAS-LH+LH-NompC::GFP/nompC[3];nompC-GAL4	LH+LH-NOMPC:GFP	4	-2561.92	0.36776
w*;nompC[3],UAS-LH+LH-NompC::GFP/nompC[3];nompC-GAL4	LH+LH-NOMPC:GFP	4	-2132.72	0.27794
w*;nompC[3],UAS-LH+LH-NompC::GFP/nompC[3];nompC-GAL4	LH+LH-NOMPC:GFP	4	-1698.64	0.12306
w*;nompC[3],UAS-LH+LH-NompC::GFP/nompC[3];nompC-GAL4	LH+LH-NOMPC:GFP	4	-1250.65	0.05802
w*;nompC[3],UAS-LH+LH-NompC::GFP/nompC[3];nompC-GAL4	LH+LH-NOMPC:GFP	4	-797.618	0.02616
w*;nompC[3],UAS-LH+LH-NompC::GFP/nompC[3];nompC-GAL4	LH+LH-NOMPC:GFP	4	-336.122	0.01144
w*;nompC[3],UAS-LH+LH-NompC::GFP/nompC[3];nompC-GAL4	LH+LH-NOMPC:GFP	4	-168.775	0
w*;nompC[3],UAS-LH+LH-NompC::GFP/nompC[3];nompC-GAL4	LH+LH-NOMPC:GFP	4	-84.5596	0.0065
w*;nompC[3],UAS-LH+LH-NompC::GFP/nompC[3];nompC-GAL4	LH+LH-NOMPC:GFP	4	-42.4662	0.00096
w*;nompC[3],UAS-LH+LH-NompC::GFP/nompC[3];nompC-GAL4	LH+LH-NOMPC:GFP	4	-21.6569	0.00226
w*;nompC[3],UAS-LH+LH-NompC::GFP/nompC[3];nompC-GAL4	LH+LH-NOMPC:GFP	4	21.7924	0.0011
w*;nompC[3],UAS-LH+LH-NompC::GFP/nompC[3];nompC-GAL4	LH+LH-NOMPC:GFP	4	42.3691	0.00536
w*;nompC[3],UAS-LH+LH-NompC::GFP/nompC[3];nompC-GAL4	LH+LH-NOMPC:GFP	4	86.5002	0.00848
w*;nompC[3],UAS-LH+LH-NompC::GFP/nompC[3];nompC-GAL4	LH+LH-NOMPC:GFP	4	169.153	0.01194
w*;nompC[3],UAS-LH+LH-NompC::GFP/nompC[3];nompC-GAL4	LH+LH-NOMPC:GFP	4	335.389	0.0194
w*;nompC[3],UAS-LH+LH-NompC::GFP/nompC[3];nompC-GAL4	LH+LH-NOMPC:GFP	4	798.071	0
w*;nompC[3],UAS-LH+LH-NompC::GFP/nompC[3];nompC-GAL4	LH+LH-NOMPC:GFP	4	1251.82	0.1426
w*;nompC[3],UAS-LH+LH-NompC::GFP/nompC[3];nompC-GAL4	LH+LH-NOMPC:GFP	4	1700.87	0.25158
w*;nompC[3],UAS-LH+LH-NompC::GFP/nompC[3];nompC-GAL4	LH+LH-NOMPC:GFP	4	2140.35	0.36588
w*;nompC[3],UAS-LH+LH-NompC::GFP/nompC[3];nompC-GAL4	LH+LH-NOMPC:GFP	4	2571.09	0.47538
w*;nompC[3],UAS-LH+LH-NompC::GFP/nompC[3];nompC-GAL4	LH+LH-NOMPC:GFP	4	3771.5	0.72014
w*;nompC[3],UAS-LH+LH-NompC::GFP/nompC[3];nompC-GAL4	LH+LH-NOMPC:GFP	4	7180.66	0.93212
w*;nompC[3],UAS-LH+LH-NompC::GFP/nompC[3];nompC-GAL4	LH+LH-NOMPC:GFP	4	9336.99	1
w*;nompC[3],UAS-LH+LH-NompC::GFP/nompC[3];nompC-GAL4	LH+LH-NOMPC:GFP	5	-9593.48	1
w*;nompC[3],UAS-LH+LH-NompC::GFP/nompC[3];nompC-GAL4	LH+LH-NOMPC:GFP	5	-7512.13	0.75904
w*;nompC[3],UAS-LH+LH-NompC::GFP/nompC[3];nompC-GAL4	LH+LH-NOMPC:GFP	5	-3896.95	0.65918
w*;nompC[3],UAS-LH+LH-NompC::GFP/nompC[3];nompC-GAL4	LH+LH-NOMPC:GFP	5	-2649.04	0.36764
w*;nompC[3],UAS-LH+LH-NompC::GFP/nompC[3];nompC-GAL4	LH+LH-NOMPC:GFP	5	-2187.61	0.1945
w*;nompC[3],UAS-LH+LH-NompC::GFP/nompC[3];nompC-GAL4	LH+LH-NOMPC:GFP	5	-1740.8	0.09474
w*;nompC[3],UAS-LH+LH-NompC::GFP/nompC[3];nompC-GAL4	LH+LH-NOMPC:GFP	5	-1279.82	0.09062
w*;nompC[3],UAS-LH+LH-NompC::GFP/nompC[3];nompC-GAL4	LH+LH-NOMPC:GFP	5	-822.23	0.05188
w*;nompC[3],UAS-LH+LH-NompC::GFP/nompC[3];nompC-GAL4	LH+LH-NOMPC:GFP	5	-343.33	0.00292
w*;nompC[3],UAS-LH+LH-NompC::GFP/nompC[3];nompC-GAL4	LH+LH-NOMPC:GFP	5	-172.155	0.01756
w*;nompC[3],UAS-LH+LH-NompC::GFP/nompC[3];nompC-GAL4	LH+LH-NOMPC:GFP	5	-86.3123	0.0045
w*;nompC[3],UAS-LH+LH-NompC::GFP/nompC[3];nompC-GAL4	LH+LH-NOMPC:GFP	5	-43.8624	0
w*;nompC[3],UAS-LH+LH-NompC::GFP/nompC[3];nompC-GAL4	LH+LH-NOMPC:GFP	5	-21.7715	0.0041
w*;nompC[3],UAS-LH+LH-NompC::GFP/nompC[3];nompC-GAL4	LH+LH-NOMPC:GFP	5	22.2914	0.08918
w*;nompC[3],UAS-LH+LH-NompC::GFP/nompC[3];nompC-GAL4	LH+LH-NOMPC:GFP	5	43.6576	0.0916
w*;nompC[3],UAS-LH+LH-NompC::GFP/nompC[3];nompC-GAL4	LH+LH-NOMPC:GFP	5	85.1717	0.10704
w*;nompC[3],UAS-LH+LH-NompC::GFP/nompC[3];nompC-GAL4	LH+LH-NOMPC:GFP	5	173.704	0.08514
w*;nompC[3],UAS-LH+LH-NompC::GFP/nompC[3];nompC-GAL4	LH+LH-NOMPC:GFP	5	344.268	0.10196
w*;nompC[3],UAS-LH+LH-NompC::GFP/nompC[3];nompC-GAL4	LH+LH-NOMPC:GFP	5	821.389	0
w*;nompC[3],UAS-LH+LH-NompC::GFP/nompC[3];nompC-GAL4	LH+LH-NOMPC:GFP	5	1304.69	0.096
w*;nompC[3],UAS-LH+LH-NompC::GFP/nompC[3];nompC-GAL4	LH+LH-NOMPC:GFP	5	1786.62	0.08624
w*;nompC[3],UAS-LH+LH-NompC::GFP/nompC[3];nompC-GAL4	LH+LH-NOMPC:GFP	5	2241.2	0.10776
w*;nompC[3],UAS-LH+LH-NompC::GFP/nompC[3];nompC-GAL4	LH+LH-NOMPC:GFP	5	2714.19	0.53568
w*;nompC[3],UAS-LH+LH-NompC::GFP/nompC[3];nompC-GAL4	LH+LH-NOMPC:GFP	5	4070.48	0.69168
w*;nompC[3],UAS-LH+LH-NompC::GFP/nompC[3];nompC-GAL4	LH+LH-NOMPC:GFP	5	7944.63	0.94044
w*;nompC[3],UAS-LH+LH-NompC::GFP/nompC[3];nompC-GAL4	LH+LH-NOMPC:GFP	5	10615	1
w*;nompC[3],UAS-LH+LH-NompC::GFP/nompC[3];nompC-GAL4	LH+LH-NOMPC:GFP	6	-5923.61	1
w*;nompC[3],UAS-LH+LH-NompC::GFP/nompC[3];nompC-GAL4	LH+LH-NOMPC:GFP	6	-4516.68	0.84012
w*;nompC[3],UAS-LH+LH-NompC::GFP/nompC[3];nompC-GAL4	LH+LH-NOMPC:GFP	6	-2375	0.45746
w*;nompC[3],UAS-LH+LH-NompC::GFP/nompC[3];nompC-GAL4	LH+LH-NOMPC:GFP	6	-1615.64	0.21734
w*;nompC[3],UAS-LH+LH-NompC::GFP/nompC[3];nompC-GAL4	LH+LH-NOMPC:GFP	6	-1337.28	0.16774
w*;nompC[3],UAS-LH+LH-NompC::GFP/nompC[3];nompC-GAL4	LH+LH-NOMPC:GFP	6	-1104.61	0.13974
w*;nompC[3],UAS-LH+LH-NompC::GFP/nompC[3];nompC-GAL4	LH+LH-NOMPC:GFP	6	-808.418	0.02072
w*;nompC[3],UAS-LH+LH-NompC::GFP/nompC[3];nompC-GAL4	LH+LH-NOMPC:GFP	6	-519.922	0
w*;nompC[3],UAS-LH+LH-NompC::GFP/nompC[3];nompC-GAL4	LH+LH-NOMPC:GFP	6	-233.394	0.00502
w*;nompC[3],UAS-LH+LH-NompC::GFP/nompC[3];nompC-GAL4	LH+LH-NOMPC:GFP	6	-127.85	0.00898
w*;nompC[3],UAS-LH+LH-NompC::GFP/nompC[3];nompC-GAL4	LH+LH-NOMPC:GFP	6	-74.0382	0.00296
w*;nompC[3],UAS-LH+LH-NompC::GFP/nompC[3];nompC-GAL4	LH+LH-NOMPC:GFP	6	-41.9666	0.00828
w*;nompC[3],UAS-LH+LH-NompC::GFP/nompC[3];nompC-GAL4	LH+LH-NOMPC:GFP	6	-28.434	0.00218
w*;nompC[3],UAS-LH+LH-NompC::GFP/nompC[3];nompC-GAL4	LH+LH-NOMPC:GFP	6	7.32166	0.0072
w*;nompC[3],UAS-LH+LH-NompC::GFP/nompC[3];nompC-GAL4	LH+LH-NOMPC:GFP	6	33.3085	0.00868
w*;nompC[3],UAS-LH+LH-NompC::GFP/nompC[3];nompC-GAL4	LH+LH-NOMPC:GFP	6	87.0448	0.00922
w*;nompC[3],UAS-LH+LH-NompC::GFP/nompC[3];nompC-GAL4	LH+LH-NOMPC:GFP	6	184.714	0.00922
w*;nompC[3],UAS-LH+LH-NompC::GFP/nompC[3];nompC-GAL4	LH+LH-NOMPC:GFP	6	470.768	0.02424
w*;nompC[3],UAS-LH+LH-NompC::GFP/nompC[3];nompC-GAL4	LH+LH-NOMPC:GFP	6	746.097	0.00854
w*;nompC[3],UAS-LH+LH-NompC::GFP/nompC[3];nompC-GAL4	LH+LH-NOMPC:GFP	6	1025.98	0.0685
w*;nompC[3],UAS-LH+LH-NompC::GFP/nompC[3];nompC-GAL4	LH+LH-NOMPC:GFP	6	1320.56	0.02678
w*;nompC[3],UAS-LH+LH-NompC::GFP/nompC[3];nompC-GAL4	LH+LH-NOMPC:GFP	6	1520.8	0.11874
w*;nompC[3],UAS-LH+LH-NompC::GFP/nompC[3];nompC-GAL4	LH+LH-NOMPC:GFP	6	2477.16	0.31022
w*;nompC[3],UAS-LH+LH-NompC::GFP/nompC[3];nompC-GAL4	LH+LH-NOMPC:GFP	6	5016.75	0.73452
w*;nompC[3],UAS-LH+LH-NompC::GFP/nompC[3];nompC-GAL4	LH+LH-NOMPC:GFP	6	6756.13	0.87896
w*;nompC[3],UAS-LH+LH-NompC::GFP/nompC[3];nompC-GAL4	LH+LH-NOMPC:GFP	6	9984.94	1
w*;nompC[3]	nompC_KO	1	-12214.4	1
w*;nompC[3]	nompC_KO	1	-8957.1	0.94228
w*;nompC[3]	nompC_KO	1	-5911.18	0.66654
w*;nompC[3]	nompC_KO	1	-3375.88	0.33726
w*;nompC[3]	nompC_KO	1	-2467.69	0.19982
w*;nompC[3]	nompC_KO	1	-2012.37	0.14892
w*;nompC[3]	nompC_KO	1	-1541.86	0.10014
w*;nompC[3]	nompC_KO	1	-1047.73	0.05894
w*;nompC[3]	nompC_KO	1	-565.682	0.02722
w*;nompC[3]	nompC_KO	1	-243.758	0.00684
w*;nompC[3]	nompC_KO	1	-117.787	0.00236
w*;nompC[3]	nompC_KO	1	-59.0793	0
w*;nompC[3]	nompC_KO	1	-25.7031	0.0005
w*;nompC[3]	nompC_KO	1	6.81533	0
w*;nompC[3]	nompC_KO	1	40.7879	0.00114
w*;nompC[3]	nompC_KO	1	76.4168	0.0036
w*;nompC[3]	nompC_KO	1	137.924	0.00854
w*;nompC[3]	nompC_KO	1	261.138	0.01932
w*;nompC[3]	nompC_KO	1	578.394	0.05172
w*;nompC[3]	nompC_KO	1	1056.37	0.09916
w*;nompC[3]	nompC_KO	1	1540.16	0.15274
w*;nompC[3]	nompC_KO	1	2013.54	0.22084
w*;nompC[3]	nompC_KO	1	2487.76	0.26086
w*;nompC[3]	nompC_KO	1	3411.78	0.40578
w*;nompC[3]	nompC_KO	1	6111.65	0.73058
w*;nompC[3]	nompC_KO	1	9385.84	0.95652
w*;nompC[3]	nompC_KO	1	13022.2	1
w*;nompC[3]	nompC_KO	2	-11482.6	1
w*;nompC[3]	nompC_KO	2	-8056.1	0.90644
w*;nompC[3]	nompC_KO	2	-5173.05	0.69626
w*;nompC[3]	nompC_KO	2	-2885.73	0.40148
w*;nompC[3]	nompC_KO	2	-2117.33	0.24452
w*;nompC[3]	nompC_KO	2	-1735.39	0.16942
w*;nompC[3]	nompC_KO	2	-1341.97	0.10344
w*;nompC[3]	nompC_KO	2	-925.645	0.05266
w*;nompC[3]	nompC_KO	2	-512.107	0.01802
w*;nompC[3]	nompC_KO	2	-223.153	0.00116
w*;nompC[3]	nompC_KO	2	-110.907	0.0018
w*;nompC[3]	nompC_KO	2	-56.918	0.00124
w*;nompC[3]	nompC_KO	2	-25.2374	0
w*;nompC[3]	nompC_KO	2	6.30478	0
w*;nompC[3]	nompC_KO	2	36.0635	0.00208
w*;nompC[3]	nompC_KO	2	65.6501	0.00344
w*;nompC[3]	nompC_KO	2	119.197	0.00216
w*;nompC[3]	nompC_KO	2	234.751	0.00952
w*;nompC[3]	nompC_KO	2	520.645	0.0398
w*;nompC[3]	nompC_KO	2	921.032	0.05892
w*;nompC[3]	nompC_KO	2	1322.11	0.11618
w*;nompC[3]	nompC_KO	2	1734.45	0.2145
w*;nompC[3]	nompC_KO	2	2141.22	0.3048
w*;nompC[3]	nompC_KO	2	2934.82	0.4841
w*;nompC[3]	nompC_KO	2	5304.59	0.75504
w*;nompC[3]	nompC_KO	2	8237.63	0.9367
w*;nompC[3]	nompC_KO	2	11632.4	1
w*;nompC[3]	nompC_KO	3	-12593.2	1
w*;nompC[3]	nompC_KO	3	-9066.03	0.89858
w*;nompC[3]	nompC_KO	3	-5740.78	0.6502
w*;nompC[3]	nompC_KO	3	-3228.13	0.32924
w*;nompC[3]	nompC_KO	3	-2401.35	0.1791
w*;nompC[3]	nompC_KO	3	-1939.07	0.11318
w*;nompC[3]	nompC_KO	3	-1472.31	0.0763
w*;nompC[3]	nompC_KO	3	-1031.25	0.0433
w*;nompC[3]	nompC_KO	3	-565.939	0.01512
w*;nompC[3]	nompC_KO	3	-240.731	0
w*;nompC[3]	nompC_KO	3	-117.962	0.00188
w*;nompC[3]	nompC_KO	3	-61.7725	0.0092
w*;nompC[3]	nompC_KO	3	-28.3647	0.01062
w*;nompC[3]	nompC_KO	3	7.53945	0.00212
w*;nompC[3]	nompC_KO	3	44.7645	0.00286
w*;nompC[3]	nompC_KO	3	81.1339	0
w*;nompC[3]	nompC_KO	3	136.788	0.00186
w*;nompC[3]	nompC_KO	3	255.328	0.00794
w*;nompC[3]	nompC_KO	3	572.723	0.03702
w*;nompC[3]	nompC_KO	3	1031.64	0.07568
w*;nompC[3]	nompC_KO	3	1458.17	0.12032
w*;nompC[3]	nompC_KO	3	1888.22	0.17216
w*;nompC[3]	nompC_KO	3	2361.6	0.2422
w*;nompC[3]	nompC_KO	3	3216.11	0.39172
w*;nompC[3]	nompC_KO	3	5706.94	0.68026
w*;nompC[3]	nompC_KO	3	9000.68	0.93702
w*;nompC[3]	nompC_KO	3	12380.6	1
w*;nompC[3]	nompC_KO	4	-14788	1
w*;nompC[3]	nompC_KO	4	-10960.1	0.9723
w*;nompC[3]	nompC_KO	4	-7101.58	0.69918
w*;nompC[3]	nompC_KO	4	-3951.84	0.33526
w*;nompC[3]	nompC_KO	4	-2901.75	0.1865
w*;nompC[3]	nompC_KO	4	-2362.27	0.12986
w*;nompC[3]	nompC_KO	4	-1784.55	0.08672
w*;nompC[3]	nompC_KO	4	-1208.62	0.05344
w*;nompC[3]	nompC_KO	4	-664.668	0.0196
w*;nompC[3]	nompC_KO	4	-280.233	0.00306
w*;nompC[3]	nompC_KO	4	-131.437	0.00368
w*;nompC[3]	nompC_KO	4	-69.4477	0
w*;nompC[3]	nompC_KO	4	-31.7159	0.00052
w*;nompC[3]	nompC_KO	4	5.18033	0
w*;nompC[3]	nompC_KO	4	40.3125	0.00096
w*;nompC[3]	nompC_KO	4	75.4944	0.0045
w*;nompC[3]	nompC_KO	4	142.549	0.01076
w*;nompC[3]	nompC_KO	4	284.262	0.00488
w*;nompC[3]	nompC_KO	4	661.338	0.03804
w*;nompC[3]	nompC_KO	4	1222.7	0.10742
w*;nompC[3]	nompC_KO	4	1770.39	0.155
w*;nompC[3]	nompC_KO	4	2304.41	0.21728
w*;nompC[3]	nompC_KO	4	2862.4	0.2983
w*;nompC[3]	nompC_KO	4	3896.3	0.4374
w*;nompC[3]	nompC_KO	4	7009.61	0.72414
w*;nompC[3]	nompC_KO	4	10873.2	0.94264
w*;nompC[3]	nompC_KO	4	15221.4	1
w*;nompC[3]	nompC_KO	5	-11192.6	1
w*;nompC[3]	nompC_KO	5	-8092.66	0.89416
w*;nompC[3]	nompC_KO	5	-5338.55	0.6879
w*;nompC[3]	nompC_KO	5	-3085.17	0.39128
w*;nompC[3]	nompC_KO	5	-2288.6	0.22098
w*;nompC[3]	nompC_KO	5	-1851.51	0.15344
w*;nompC[3]	nompC_KO	5	-1414.16	0.10148
w*;nompC[3]	nompC_KO	5	-974.606	0.05618
w*;nompC[3]	nompC_KO	5	-537.679	0.02362
w*;nompC[3]	nompC_KO	5	-229.798	0.00466
w*;nompC[3]	nompC_KO	5	-108.777	0
w*;nompC[3]	nompC_KO	5	-51.4049	0.00298
w*;nompC[3]	nompC_KO	5	-20.6258	0.00306
w*;nompC[3]	nompC_KO	5	11.1673	0.00012
w*;nompC[3]	nompC_KO	5	44.5555	0
w*;nompC[3]	nompC_KO	5	72.8573	0.00382
w*;nompC[3]	nompC_KO	5	132.588	0.0085
w*;nompC[3]	nompC_KO	5	247.138	0.01366
w*;nompC[3]	nompC_KO	5	555.213	0.04382
w*;nompC[3]	nompC_KO	5	1000.51	0.09044
w*;nompC[3]	nompC_KO	5	1425.5	0.14334
w*;nompC[3]	nompC_KO	5	1894.59	0.21228
w*;nompC[3]	nompC_KO	5	2332.41	0.27856
w*;nompC[3]	nompC_KO	5	3141.38	0.399
w*;nompC[3]	nompC_KO	5	5661.04	0.66982
w*;nompC[3]	nompC_KO	5	8785.79	0.91382
w*;nompC[3]	nompC_KO	5	12444	1
w*;nompC[3]	nompC_KO	6	-11857.8	1
w*;nompC[3]	nompC_KO	6	-8414.35	0.95588
w*;nompC[3]	nompC_KO	6	-5443.95	0.753
w*;nompC[3]	nompC_KO	6	-3044.59	0.43888
w*;nompC[3]	nompC_KO	6	-2222.75	0.24878
w*;nompC[3]	nompC_KO	6	-1817.84	0.16118
w*;nompC[3]	nompC_KO	6	-1406.82	0.07566
w*;nompC[3]	nompC_KO	6	-966.219	0.0317
w*;nompC[3]	nompC_KO	6	-535.82	0.01192
w*;nompC[3]	nompC_KO	6	-237.973	0.0012
w*;nompC[3]	nompC_KO	6	-124.544	0.00278
w*;nompC[3]	nompC_KO	6	-69.687	0.00258
w*;nompC[3]	nompC_KO	6	-35.8466	0
w*;nompC[3]	nompC_KO	6	-1.86429	0.0033
w*;nompC[3]	nompC_KO	6	29.856	0.00154
w*;nompC[3]	nompC_KO	6	59.9241	0.00302
w*;nompC[3]	nompC_KO	6	113.203	0
w*;nompC[3]	nompC_KO	6	233.183	0.00344
w*;nompC[3]	nompC_KO	6	532.773	0.01852
w*;nompC[3]	nompC_KO	6	954.889	0.04978
w*;nompC[3]	nompC_KO	6	1378.76	0.10536
w*;nompC[3]	nompC_KO	6	1793.23	0.19048
w*;nompC[3]	nompC_KO	6	2214.89	0.28394
w*;nompC[3]	nompC_KO	6	2981.91	0.45096
w*;nompC[3]	nompC_KO	6	5263.17	0.73252
w*;nompC[3]	nompC_KO	6	8068.54	0.92108
w*;nompC[3]	nompC_KO	6	10823.8	1
w*;nompC[3]	nompC_KO	7	-12093.4	1
w*;nompC[3]	nompC_KO	7	-8038.82	0.84164
w*;nompC[3]	nompC_KO	7	-5023.51	0.57794
w*;nompC[3]	nompC_KO	7	-2707.37	0.2821
w*;nompC[3]	nompC_KO	7	-1967.5	0.09258
w*;nompC[3]	nompC_KO	7	-1631.04	0.01452
w*;nompC[3]	nompC_KO	7	-1264.78	0.0189
w*;nompC[3]	nompC_KO	7	-844.317	0.0139
w*;nompC[3]	nompC_KO	7	-449.606	0.00776
w*;nompC[3]	nompC_KO	7	-198.703	0.0067
w*;nompC[3]	nompC_KO	7	-95.0599	0.0046
w*;nompC[3]	nompC_KO	7	-41.9173	0.00502
w*;nompC[3]	nompC_KO	7	-23.7075	0
w*;nompC[3]	nompC_KO	7	2.7081	0.00056
w*;nompC[3]	nompC_KO	7	15.7437	0
w*;nompC[3]	nompC_KO	7	41.4181	0.00272
w*;nompC[3]	nompC_KO	7	87.2891	0.00388
w*;nompC[3]	nompC_KO	7	202.941	0.00856
w*;nompC[3]	nompC_KO	7	457.374	0.04206
w*;nompC[3]	nompC_KO	7	786.946	0.08834
w*;nompC[3]	nompC_KO	7	1137.35	0.12564
w*;nompC[3]	nompC_KO	7	1499.31	0.0885
w*;nompC[3]	nompC_KO	7	1855.05	0.15664
w*;nompC[3]	nompC_KO	7	2505.8	0.35482
w*;nompC[3]	nompC_KO	7	4427.18	0.57006
w*;nompC[3]	nompC_KO	7	6894.18	0.81446
w*;nompC[3]	nompC_KO	7	9502.19	1
w*;nompC[3]	nompC_KO	8	-6940.37	1
w*;nompC[3]	nompC_KO	8	-5271.41	0.84294
w*;nompC[3]	nompC_KO	8	-3859.74	0.61138
w*;nompC[3]	nompC_KO	8	-2230.49	0.30868
w*;nompC[3]	nompC_KO	8	-1605.95	0.15934
w*;nompC[3]	nompC_KO	8	-1212.75	0.07602
w*;nompC[3]	nompC_KO	8	-920.377	0.0419
w*;nompC[3]	nompC_KO	8	-643.384	0.02194
w*;nompC[3]	nompC_KO	8	-358.009	0.02194
w*;nompC[3]	nompC_KO	8	-154.923	0.0308
w*;nompC[3]	nompC_KO	8	-70.9104	0.01414
w*;nompC[3]	nompC_KO	8	-34.5108	0
w*;nompC[3]	nompC_KO	8	-15.1675	0.009
w*;nompC[3]	nompC_KO	8	3.20044	0.01164
w*;nompC[3]	nompC_KO	8	24.5698	0.02102
w*;nompC[3]	nompC_KO	8	44.7567	0.02184
w*;nompC[3]	nompC_KO	8	79.8211	0.02246
w*;nompC[3]	nompC_KO	8	150.796	0.0187
w*;nompC[3]	nompC_KO	8	345.587	0
w*;nompC[3]	nompC_KO	8	628.126	0.0546
w*;nompC[3]	nompC_KO	8	928.339	0.16886
w*;nompC[3]	nompC_KO	8	1199.18	0.23724
w*;nompC[3]	nompC_KO	8	1481.51	0.31286
w*;nompC[3]	nompC_KO	8	2087.57	0.44184
w*;nompC[3]	nompC_KO	8	3732.74	0.71848
w*;nompC[3]	nompC_KO	8	6147.73	0.98392
w*;nompC[3]	nompC_KO	8	9338.5	1
w*;nompC[3]	nompC_KO	9	-12793.6	1
w*;nompC[3]	nompC_KO	9	-9114.07	0.85252
w*;nompC[3]	nompC_KO	9	-5888.22	0.588
w*;nompC[3]	nompC_KO	9	-3272.76	0.30196
w*;nompC[3]	nompC_KO	9	-2390.77	0.17992
w*;nompC[3]	nompC_KO	9	-1933.82	0.12782
w*;nompC[3]	nompC_KO	9	-1480.98	0.08286
w*;nompC[3]	nompC_KO	9	-1034.83	0.04546
w*;nompC[3]	nompC_KO	9	-579.865	0.0113
w*;nompC[3]	nompC_KO	9	-256.576	0
w*;nompC[3]	nompC_KO	9	-128.081	0.00072
w*;nompC[3]	nompC_KO	9	-71.6158	0.00158
w*;nompC[3]	nompC_KO	9	-40.3342	0.00052
w*;nompC[3]	nompC_KO	9	8.77244	0.00158
w*;nompC[3]	nompC_KO	9	23.8903	0.00788
w*;nompC[3]	nompC_KO	9	56.3276	0.00566
w*;nompC[3]	nompC_KO	9	113.63	0
w*;nompC[3]	nompC_KO	9	232.826	0.0047
w*;nompC[3]	nompC_KO	9	541.398	0.02646
w*;nompC[3]	nompC_KO	9	1000.5	0.0649
w*;nompC[3]	nompC_KO	9	1450.97	0.06088
w*;nompC[3]	nompC_KO	9	1902.93	0.10306
w*;nompC[3]	nompC_KO	9	2367.49	0.2042
w*;nompC[3]	nompC_KO	9	3258.79	0.32892
w*;nompC[3]	nompC_KO	9	5871.5	0.61004
w*;nompC[3]	nompC_KO	9	9107.24	0.8664
w*;nompC[3]	nompC_KO	9	12987.4	1
w*;nompC[3]	nompC_KO	11	-9961.08	1
w*;nompC[3]	nompC_KO	11	-7036.35	0.91524
w*;nompC[3]	nompC_KO	11	-4532.39	0.65348
w*;nompC[3]	nompC_KO	11	-2518.03	0.3462
w*;nompC[3]	nompC_KO	11	-1848.83	0.20938
w*;nompC[3]	nompC_KO	11	-1502.04	0.15888
w*;nompC[3]	nompC_KO	11	-1148.87	0.10424
w*;nompC[3]	nompC_KO	11	-795.733	0.0347
w*;nompC[3]	nompC_KO	11	-431.623	0.00718
w*;nompC[3]	nompC_KO	11	-188.63	0.00862
w*;nompC[3]	nompC_KO	11	-97.7273	0.00136
w*;nompC[3]	nompC_KO	11	-52.9113	0
w*;nompC[3]	nompC_KO	11	-28.6613	0.00336
w*;nompC[3]	nompC_KO	11	5.36479	0.0065
w*;nompC[3]	nompC_KO	11	19.1714	0
w*;nompC[3]	nompC_KO	11	44.2075	0.0014
w*;nompC[3]	nompC_KO	11	91.9877	0.00212
w*;nompC[3]	nompC_KO	11	188.368	0.00278
w*;nompC[3]	nompC_KO	11	431.147	0.01808
w*;nompC[3]	nompC_KO	11	784.401	0.04908
w*;nompC[3]	nompC_KO	11	1129.28	0.08164
w*;nompC[3]	nompC_KO	11	1477.68	0.12504
w*;nompC[3]	nompC_KO	11	1831.97	0.18622
w*;nompC[3]	nompC_KO	11	2522.63	0.30968
w*;nompC[3]	nompC_KO	11	4539.15	0.5994
w*;nompC[3]	nompC_KO	11	7026	0.86434
w*;nompC[3]	nompC_KO	11	9970.3	1
w*;nompC[3]	nompC_KO	12	-12359.3	0.98696
w*;nompC[3]	nompC_KO	12	-9109.12	1
w*;nompC[3]	nompC_KO	12	-6001.88	0.88418
w*;nompC[3]	nompC_KO	12	-3393.27	0.62474
w*;nompC[3]	nompC_KO	12	-2480.16	0.47484
w*;nompC[3]	nompC_KO	12	-2025.7	0.37676
w*;nompC[3]	nompC_KO	12	-1555.59	0.2408
w*;nompC[3]	nompC_KO	12	-1077.18	0.08764
w*;nompC[3]	nompC_KO	12	-592.617	0.00634
w*;nompC[3]	nompC_KO	12	-264.856	0.00942
w*;nompC[3]	nompC_KO	12	-138.852	0.00526
w*;nompC[3]	nompC_KO	12	-70.8226	0.00126
w*;nompC[3]	nompC_KO	12	-37.8557	0
w*;nompC[3]	nompC_KO	12	3.80566	0.00382
w*;nompC[3]	nompC_KO	12	27.9208	0
w*;nompC[3]	nompC_KO	12	60.8608	0.00304
w*;nompC[3]	nompC_KO	12	124.327	0.00342
w*;nompC[3]	nompC_KO	12	255.67	0.00846
w*;nompC[3]	nompC_KO	12	589.96	0.03812
w*;nompC[3]	nompC_KO	12	1083.34	0.08638
w*;nompC[3]	nompC_KO	12	1559.49	0.19166
w*;nompC[3]	nompC_KO	12	2019.62	0.32156
w*;nompC[3]	nompC_KO	12	2500.43	0.41046
w*;nompC[3]	nompC_KO	12	3431.84	0.57062
w*;nompC[3]	nompC_KO	12	6126.64	0.80758
w*;nompC[3]	nompC_KO	12	9394.21	0.90766
w*;nompC[3]	nompC_KO	12	12744.4	1
w*;nompC[3]	nompC_KO	13	-11301.9	1
w*;nompC[3]	nompC_KO	13	-8072.5	0.86028
w*;nompC[3]	nompC_KO	13	-5242.95	0.638
w*;nompC[3]	nompC_KO	13	-2942.63	0.3958
w*;nompC[3]	nompC_KO	13	-2160.55	0.27054
w*;nompC[3]	nompC_KO	13	-1753.18	0.20116
w*;nompC[3]	nompC_KO	13	-1350.15	0.08224
w*;nompC[3]	nompC_KO	13	-932.209	0
w*;nompC[3]	nompC_KO	13	-513.502	0.0077
w*;nompC[3]	nompC_KO	13	-226.449	0.0135
w*;nompC[3]	nompC_KO	13	-112.735	0.00742
w*;nompC[3]	nompC_KO	13	-69.5447	0.00326
w*;nompC[3]	nompC_KO	13	-39.4386	0.00248
w*;nompC[3]	nompC_KO	13	5.90146	0.00604
w*;nompC[3]	nompC_KO	13	21.2071	0.0002
w*;nompC[3]	nompC_KO	13	55.8899	0
w*;nompC[3]	nompC_KO	13	109.504	0.00702
w*;nompC[3]	nompC_KO	13	218.926	0.01084
w*;nompC[3]	nompC_KO	13	510.555	0.03018
w*;nompC[3]	nompC_KO	13	931.433	0.0801
w*;nompC[3]	nompC_KO	13	1357.31	0.1383
w*;nompC[3]	nompC_KO	13	1790.89	0.2072
w*;nompC[3]	nompC_KO	13	2219.65	0.28488
w*;nompC[3]	nompC_KO	13	3053.47	0.4154
w*;nompC[3]	nompC_KO	13	5623.63	0.65898
w*;nompC[3]	nompC_KO	13	8878.19	0.87418
w*;nompC[3]	nompC_KO	13	12382.2	1
w*;nompC[3]	nompC_KO	14	-10285.6	1
w*;nompC[3]	nompC_KO	14	-7322.34	0.9107
w*;nompC[3]	nompC_KO	14	-4748.48	0.65116
w*;nompC[3]	nompC_KO	14	-2678.81	0.36258
w*;nompC[3]	nompC_KO	14	-1954.37	0.23676
w*;nompC[3]	nompC_KO	14	-1588.56	0.16908
w*;nompC[3]	nompC_KO	14	-1224.95	0.0735
w*;nompC[3]	nompC_KO	14	-847.09	0.007
w*;nompC[3]	nompC_KO	14	-474.743	0.01396
w*;nompC[3]	nompC_KO	14	-216.016	0.02526
w*;nompC[3]	nompC_KO	14	-109.049	0.0165
w*;nompC[3]	nompC_KO	14	-59.8097	0.0094
w*;nompC[3]	nompC_KO	14	-34.1749	0.0054
w*;nompC[3]	nompC_KO	14	7.40556	0
w*;nompC[3]	nompC_KO	14	25.3332	0
w*;nompC[3]	nompC_KO	14	52.4504	0.00816
w*;nompC[3]	nompC_KO	14	93.8566	0.01078
w*;nompC[3]	nompC_KO	14	194.167	0.0131
w*;nompC[3]	nompC_KO	14	457.729	0.03552
w*;nompC[3]	nompC_KO	14	839.204	0.07694
w*;nompC[3]	nompC_KO	14	1212.48	0.1279
w*;nompC[3]	nompC_KO	14	1573.79	0.17654
w*;nompC[3]	nompC_KO	14	1947.57	0.21102
w*;nompC[3]	nompC_KO	14	2678.31	0.30386
w*;nompC[3]	nompC_KO	14	4812.15	0.57838
w*;nompC[3]	nompC_KO	14	7554.99	0.8572
w*;nompC[3]	nompC_KO	14	10797.1	1
w*;nompC[3]	nompC_KO	15	-13169.2	1
w*;nompC[3]	nompC_KO	15	-9306.7	0.91034
w*;nompC[3]	nompC_KO	15	-6004.92	0.6995
w*;nompC[3]	nompC_KO	15	-3349.56	0.43414
w*;nompC[3]	nompC_KO	15	-2450.27	0.28542
w*;nompC[3]	nompC_KO	15	-1982.65	0.20722
w*;nompC[3]	nompC_KO	15	-1516.45	0.14114
w*;nompC[3]	nompC_KO	15	-1048.3	0.07988
w*;nompC[3]	nompC_KO	15	-575.853	0.0319
w*;nompC[3]	nompC_KO	15	-253.33	0.00658
w*;nompC[3]	nompC_KO	15	-129.439	0.00058
w*;nompC[3]	nompC_KO	15	-70.1202	0.00122
w*;nompC[3]	nompC_KO	15	-36.2931	0.00244
w*;nompC[3]	nompC_KO	15	1.9193	0
w*;nompC[3]	nompC_KO	15	33.9422	0
w*;nompC[3]	nompC_KO	15	68.9972	0.0015
w*;nompC[3]	nompC_KO	15	126.939	0.00252
w*;nompC[3]	nompC_KO	15	248.781	0.0069
w*;nompC[3]	nompC_KO	15	566.232	0.02072
w*;nompC[3]	nompC_KO	15	1037.32	0.08024
w*;nompC[3]	nompC_KO	15	1501.21	0.15738
w*;nompC[3]	nompC_KO	15	1960.58	0.22418
w*;nompC[3]	nompC_KO	15	2434.26	0.30364
w*;nompC[3]	nompC_KO	15	3340.22	0.46586
w*;nompC[3]	nompC_KO	15	5994.53	0.71972
w*;nompC[3]	nompC_KO	15	9288.47	0.89472
w*;nompC[3]	nompC_KO	15	13092.4	1
w*;nompC[3]	nompC_KO	16	-12630.9	1
w*;nompC[3]	nompC_KO	16	-9012.54	0.88188
w*;nompC[3]	nompC_KO	16	-5889.78	0.66174
w*;nompC[3]	nompC_KO	16	-3312.23	0.4188
w*;nompC[3]	nompC_KO	16	-2397.15	0.28778
w*;nompC[3]	nompC_KO	16	-1946.93	0.12112
w*;nompC[3]	nompC_KO	16	-1486.51	0.05528
w*;nompC[3]	nompC_KO	16	-1006.94	0.08694
w*;nompC[3]	nompC_KO	16	-544.932	0.03654
w*;nompC[3]	nompC_KO	16	-241.715	0.00664
w*;nompC[3]	nompC_KO	16	-123.838	0.00288
w*;nompC[3]	nompC_KO	16	-68.2475	0.00102
w*;nompC[3]	nompC_KO	16	-37.0189	0
w*;nompC[3]	nompC_KO	16	4.18757	0.00182
w*;nompC[3]	nompC_KO	16	29.23	0
w*;nompC[3]	nompC_KO	16	58.7112	0.00214
w*;nompC[3]	nompC_KO	16	113.377	0.00578
w*;nompC[3]	nompC_KO	16	231.131	0.01494
w*;nompC[3]	nompC_KO	16	538.404	0.04816
w*;nompC[3]	nompC_KO	16	1012.95	0.11038
w*;nompC[3]	nompC_KO	16	1496.01	0.17504
w*;nompC[3]	nompC_KO	16	1993.29	0.23828
w*;nompC[3]	nompC_KO	16	2491.43	0.3265
w*;nompC[3]	nompC_KO	16	3412.69	0.4874
w*;nompC[3]	nompC_KO	16	6169.64	0.74648
w*;nompC[3]	nompC_KO	16	9603.36	0.92786
w*;nompC[3]	nompC_KO	16	13420.9	1
w*;nompC[3]	nompC_KO	17	-9418.95	1
w*;nompC[3]	nompC_KO	17	-6729.72	0.83206
w*;nompC[3]	nompC_KO	17	-4373.17	0.56696
w*;nompC[3]	nompC_KO	17	-2473.67	0.2911
w*;nompC[3]	nompC_KO	17	-1820.65	0.17916
w*;nompC[3]	nompC_KO	17	-1483.24	0.1306
w*;nompC[3]	nompC_KO	17	-1143.86	0.05022
w*;nompC[3]	nompC_KO	17	-799.132	0.01912
w*;nompC[3]	nompC_KO	17	-449.806	0.0285
w*;nompC[3]	nompC_KO	17	-198.796	0.01174
w*;nompC[3]	nompC_KO	17	-102.496	0.00458
w*;nompC[3]	nompC_KO	17	-54.9908	0.00328
w*;nompC[3]	nompC_KO	17	-29.4134	0.0007
w*;nompC[3]	nompC_KO	17	3.62872	0
w*;nompC[3]	nompC_KO	17	23.0148	0
w*;nompC[3]	nompC_KO	17	50.0221	0.00298
w*;nompC[3]	nompC_KO	17	95.3165	0.004
w*;nompC[3]	nompC_KO	17	190.6	4e-05
w*;nompC[3]	nompC_KO	17	432.936	0.01208
w*;nompC[3]	nompC_KO	17	785.188	0.05274
w*;nompC[3]	nompC_KO	17	1128.64	0.09528
w*;nompC[3]	nompC_KO	17	1464.42	0.14208
w*;nompC[3]	nompC_KO	17	1807.24	0.20042
w*;nompC[3]	nompC_KO	17	2490.64	0.32206
w*;nompC[3]	nompC_KO	17	4486.76	0.59458
w*;nompC[3]	nompC_KO	17	6934.41	0.85742
w*;nompC[3]	nompC_KO	17	9671.75	1
w*;nompC[3]	nompC_KO	18	-10758.9	1
w*;nompC[3]	nompC_KO	18	-7628.34	0.87906
w*;nompC[3]	nompC_KO	18	-4926.49	0.57226
w*;nompC[3]	nompC_KO	18	-2741.93	0.25012
w*;nompC[3]	nompC_KO	18	-2002.5	0.13682
w*;nompC[3]	nompC_KO	18	-1630.59	0.08926
w*;nompC[3]	nompC_KO	18	-1250.58	0.03672
w*;nompC[3]	nompC_KO	18	-868.434	0
w*;nompC[3]	nompC_KO	18	-481.275	0.00084
w*;nompC[3]	nompC_KO	18	-210.404	0.00526
w*;nompC[3]	nompC_KO	18	-104.172	0.00844
w*;nompC[3]	nompC_KO	18	-54.1649	0.00862
w*;nompC[3]	nompC_KO	18	-31.1908	0.00816
w*;nompC[3]	nompC_KO	18	4.06357	0.00748
w*;nompC[3]	nompC_KO	18	24.3911	0.00254
w*;nompC[3]	nompC_KO	18	52.0785	0
w*;nompC[3]	nompC_KO	18	97.197	0.00218
w*;nompC[3]	nompC_KO	18	201.574	0.00986
w*;nompC[3]	nompC_KO	18	471.262	0.02958
w*;nompC[3]	nompC_KO	18	855.665	0.06738
w*;nompC[3]	nompC_KO	18	1241.86	0.10706
w*;nompC[3]	nompC_KO	18	1622.13	0.14122
w*;nompC[3]	nompC_KO	18	1995.5	0.19116
w*;nompC[3]	nompC_KO	18	2735.95	0.30958
w*;nompC[3]	nompC_KO	18	4930.99	0.60298
w*;nompC[3]	nompC_KO	18	7653.55	0.88022
w*;nompC[3]	nompC_KO	18	10843.4	1
w*;nompC[3]	nompC_KO	19	-10250.7	1
w*;nompC[3]	nompC_KO	19	-7449.21	0.91202
w*;nompC[3]	nompC_KO	19	-4858.44	0.69718
w*;nompC[3]	nompC_KO	19	-2736.53	0.43274
w*;nompC[3]	nompC_KO	19	-2001.62	0.29482
w*;nompC[3]	nompC_KO	19	-1622.89	0.20604
w*;nompC[3]	nompC_KO	19	-1243.73	0.13156
w*;nompC[3]	nompC_KO	19	-858.658	0.07068
w*;nompC[3]	nompC_KO	19	-471.908	0.02538
w*;nompC[3]	nompC_KO	19	-212.089	0.00758
w*;nompC[3]	nompC_KO	19	-109.388	0.00502
w*;nompC[3]	nompC_KO	19	-57.585	0.00192
w*;nompC[3]	nompC_KO	19	-30.9675	0.00106
w*;nompC[3]	nompC_KO	19	4.16599	0
w*;nompC[3]	nompC_KO	19	23.343	0
w*;nompC[3]	nompC_KO	19	49.9331	0.00102
w*;nompC[3]	nompC_KO	19	100.108	0.00268
w*;nompC[3]	nompC_KO	19	206.069	0.01082
w*;nompC[3]	nompC_KO	19	474.082	0.01732
w*;nompC[3]	nompC_KO	19	858.147	0.0818
w*;nompC[3]	nompC_KO	19	1243.59	0.18346
w*;nompC[3]	nompC_KO	19	1632.66	0.2562
w*;nompC[3]	nompC_KO	19	2018.4	0.33892
w*;nompC[3]	nompC_KO	19	2789.67	0.48562
w*;nompC[3]	nompC_KO	19	5065.29	0.74628
w*;nompC[3]	nompC_KO	19	7917.05	0.9422
w*;nompC[3]	nompC_KO	19	11257.6	1
w*;nompC[3]	nompC_KO	20	-10709	1
w*;nompC[3]	nompC_KO	20	-7542.06	0.92732
w*;nompC[3]	nompC_KO	20	-4913.32	0.73298
w*;nompC[3]	nompC_KO	20	-2780	0.4688
w*;nompC[3]	nompC_KO	20	-1984.2	0.30002
w*;nompC[3]	nompC_KO	20	-1592.42	0.20052
w*;nompC[3]	nompC_KO	20	-1224.27	0.12016
w*;nompC[3]	nompC_KO	20	-850.467	0.05846
w*;nompC[3]	nompC_KO	20	-472.823	0.02004
w*;nompC[3]	nompC_KO	20	-207.141	0.002
w*;nompC[3]	nompC_KO	20	-104.925	0.00014
w*;nompC[3]	nompC_KO	20	-57.8294	0.00148
w*;nompC[3]	nompC_KO	20	-29.5377	0.00196
w*;nompC[3]	nompC_KO	20	5.20161	0
w*;nompC[3]	nompC_KO	20	21.8216	0
w*;nompC[3]	nompC_KO	20	49.3014	0.00216
w*;nompC[3]	nompC_KO	20	100.582	0.00372
w*;nompC[3]	nompC_KO	20	199.609	0.00692
w*;nompC[3]	nompC_KO	20	452.685	0.0338
w*;nompC[3]	nompC_KO	20	851.792	0.08618
w*;nompC[3]	nompC_KO	20	1215.42	0.1534
w*;nompC[3]	nompC_KO	20	1545.94	0.24114
w*;nompC[3]	nompC_KO	20	1902.64	0.33874
w*;nompC[3]	nompC_KO	20	2577.53	0.5103
w*;nompC[3]	nompC_KO	20	4530.06	0.74468
w*;nompC[3]	nompC_KO	20	6945.45	0.90958
w*;nompC[3]	nompC_KO	20	9660.93	1
w*;nompC[3],UAS-NompC::GFP/nompC[3];nompC-GAL4	NOMPC:GFP	1	-12153.2	0.8154
w*;nompC[3],UAS-NompC::GFP/nompC[3];nompC-GAL4	NOMPC:GFP	1	-8777.26	0.92686
w*;nompC[3],UAS-NompC::GFP/nompC[3];nompC-GAL4	NOMPC:GFP	1	-7005.6	1
w*;nompC[3],UAS-NompC::GFP/nompC[3];nompC-GAL4	NOMPC:GFP	1	-4087.34	0.97313
w*;nompC[3],UAS-NompC::GFP/nompC[3];nompC-GAL4	NOMPC:GFP	1	-3021.91	0.97313
w*;nompC[3],UAS-NompC::GFP/nompC[3];nompC-GAL4	NOMPC:GFP	1	-2603.76	0.7798
w*;nompC[3],UAS-NompC::GFP/nompC[3];nompC-GAL4	NOMPC:GFP	1	-2160.83	0.78283
w*;nompC[3],UAS-NompC::GFP/nompC[3];nompC-GAL4	NOMPC:GFP	1	-1710.22	0.84083
w*;nompC[3],UAS-NompC::GFP/nompC[3];nompC-GAL4	NOMPC:GFP	1	-1180.74	0.64498
w*;nompC[3],UAS-NompC::GFP/nompC[3];nompC-GAL4	NOMPC:GFP	1	-561.041	0.31945
w*;nompC[3],UAS-NompC::GFP/nompC[3];nompC-GAL4	NOMPC:GFP	1	-295.069	0.10518
w*;nompC[3],UAS-NompC::GFP/nompC[3];nompC-GAL4	NOMPC:GFP	1	-128.58	0.0079
w*;nompC[3],UAS-NompC::GFP/nompC[3];nompC-GAL4	NOMPC:GFP	1	-33.4254	0
w*;nompC[3],UAS-NompC::GFP/nompC[3];nompC-GAL4	NOMPC:GFP	1	10.112	0.00315
w*;nompC[3],UAS-NompC::GFP/nompC[3];nompC-GAL4	NOMPC:GFP	1	109.891	0
w*;nompC[3],UAS-NompC::GFP/nompC[3];nompC-GAL4	NOMPC:GFP	1	161.297	0.02222
w*;nompC[3],UAS-NompC::GFP/nompC[3];nompC-GAL4	NOMPC:GFP	1	260.771	0.067
w*;nompC[3],UAS-NompC::GFP/nompC[3];nompC-GAL4	NOMPC:GFP	1	415.317	0.16919
w*;nompC[3],UAS-NompC::GFP/nompC[3];nompC-GAL4	NOMPC:GFP	1	670.743	0.40323
w*;nompC[3],UAS-NompC::GFP/nompC[3];nompC-GAL4	NOMPC:GFP	1	1271.18	0.56613
w*;nompC[3],UAS-NompC::GFP/nompC[3];nompC-GAL4	NOMPC:GFP	1	1802.01	0.72563
w*;nompC[3],UAS-NompC::GFP/nompC[3];nompC-GAL4	NOMPC:GFP	1	2277.15	0.77665
w*;nompC[3],UAS-NompC::GFP/nompC[3];nompC-GAL4	NOMPC:GFP	1	2746.95	0.80712
w*;nompC[3],UAS-NompC::GFP/nompC[3];nompC-GAL4	NOMPC:GFP	1	3191.33	0.86846
w*;nompC[3],UAS-NompC::GFP/nompC[3];nompC-GAL4	NOMPC:GFP	1	4356.57	0.92394
w*;nompC[3],UAS-NompC::GFP/nompC[3];nompC-GAL4	NOMPC:GFP	1	7557.77	0.92394
w*;nompC[3],UAS-NompC::GFP/nompC[3];nompC-GAL4	NOMPC:GFP	1	9545.5	0.92172
w*;nompC[3],UAS-NompC::GFP/nompC[3];nompC-GAL4	NOMPC:GFP	1	13775.8	1
w*;nompC[3],UAS-NompC::GFP/nompC[3];nompC-GAL4	NOMPC:GFP	2	-9119.94	0.96504
w*;nompC[3],UAS-NompC::GFP/nompC[3];nompC-GAL4	NOMPC:GFP	2	-7216.37	0.81686
w*;nompC[3],UAS-NompC::GFP/nompC[3];nompC-GAL4	NOMPC:GFP	2	-4090.49	1
w*;nompC[3],UAS-NompC::GFP/nompC[3];nompC-GAL4	NOMPC:GFP	2	-2992.96	0.56213
w*;nompC[3],UAS-NompC::GFP/nompC[3];nompC-GAL4	NOMPC:GFP	2	-2586.91	0.80222
w*;nompC[3],UAS-NompC::GFP/nompC[3];nompC-GAL4	NOMPC:GFP	2	-2166	0.70009
w*;nompC[3],UAS-NompC::GFP/nompC[3];nompC-GAL4	NOMPC:GFP	2	-1676.75	0.61989
w*;nompC[3],UAS-NompC::GFP/nompC[3];nompC-GAL4	NOMPC:GFP	2	-1165.21	0.49993
w*;nompC[3],UAS-NompC::GFP/nompC[3];nompC-GAL4	NOMPC:GFP	2	-544.796	0.25187
w*;nompC[3],UAS-NompC::GFP/nompC[3];nompC-GAL4	NOMPC:GFP	2	-275.938	0.15006
w*;nompC[3],UAS-NompC::GFP/nompC[3];nompC-GAL4	NOMPC:GFP	2	-117.635	0.05058
w*;nompC[3],UAS-NompC::GFP/nompC[3];nompC-GAL4	NOMPC:GFP	2	-29.6197	0
w*;nompC[3],UAS-NompC::GFP/nompC[3];nompC-GAL4	NOMPC:GFP	2	1.32543	0.0084
w*;nompC[3],UAS-NompC::GFP/nompC[3];nompC-GAL4	NOMPC:GFP	2	99.7473	0.0023
w*;nompC[3],UAS-NompC::GFP/nompC[3];nompC-GAL4	NOMPC:GFP	2	151.16	0
w*;nompC[3],UAS-NompC::GFP/nompC[3];nompC-GAL4	NOMPC:GFP	2	240.82	0.09903
w*;nompC[3],UAS-NompC::GFP/nompC[3];nompC-GAL4	NOMPC:GFP	2	401.024	0.15334
w*;nompC[3],UAS-NompC::GFP/nompC[3];nompC-GAL4	NOMPC:GFP	2	647.81	0.26193
w*;nompC[3],UAS-NompC::GFP/nompC[3];nompC-GAL4	NOMPC:GFP	2	1220.69	0.4551
w*;nompC[3],UAS-NompC::GFP/nompC[3];nompC-GAL4	NOMPC:GFP	2	1717.11	0.45376
w*;nompC[3],UAS-NompC::GFP/nompC[3];nompC-GAL4	NOMPC:GFP	2	2237.93	0.62138
w*;nompC[3],UAS-NompC::GFP/nompC[3];nompC-GAL4	NOMPC:GFP	2	2710.41	0.63628
w*;nompC[3],UAS-NompC::GFP/nompC[3];nompC-GAL4	NOMPC:GFP	2	3102.15	0.62644
w*;nompC[3],UAS-NompC::GFP/nompC[3];nompC-GAL4	NOMPC:GFP	2	4269.51	0.82917
w*;nompC[3],UAS-NompC::GFP/nompC[3];nompC-GAL4	NOMPC:GFP	2	7524.68	0.98148
w*;nompC[3],UAS-NompC::GFP/nompC[3];nompC-GAL4	NOMPC:GFP	2	9579.64	0.93892
w*;nompC[3],UAS-NompC::GFP/nompC[3];nompC-GAL4	NOMPC:GFP	2	13642.2	1
w*;nompC[3],UAS-NompC::GFP/nompC[3];nompC-GAL4	NOMPC:GFP	2	-12896.1	0.68012
w*;nompC[3],UAS-NompC::GFP/nompC[3];nompC-GAL4	NOMPC:GFP	3	-12359	0.60323
w*;nompC[3],UAS-NompC::GFP/nompC[3];nompC-GAL4	NOMPC:GFP	3	-8997.39	0.79578
w*;nompC[3],UAS-NompC::GFP/nompC[3];nompC-GAL4	NOMPC:GFP	3	-7200.48	0.907
w*;nompC[3],UAS-NompC::GFP/nompC[3];nompC-GAL4	NOMPC:GFP	3	-4266.3	0.97956
w*;nompC[3],UAS-NompC::GFP/nompC[3];nompC-GAL4	NOMPC:GFP	3	-3149.94	0.97296
w*;nompC[3],UAS-NompC::GFP/nompC[3];nompC-GAL4	NOMPC:GFP	3	-2722.43	1
w*;nompC[3],UAS-NompC::GFP/nompC[3];nompC-GAL4	NOMPC:GFP	3	-2274.48	0.91033
w*;nompC[3],UAS-NompC::GFP/nompC[3];nompC-GAL4	NOMPC:GFP	3	-1792.48	0.80263
w*;nompC[3],UAS-NompC::GFP/nompC[3];nompC-GAL4	NOMPC:GFP	3	-1265.25	0.64789
w*;nompC[3],UAS-NompC::GFP/nompC[3];nompC-GAL4	NOMPC:GFP	3	-595.811	0.27631
w*;nompC[3],UAS-NompC::GFP/nompC[3];nompC-GAL4	NOMPC:GFP	3	-313.878	0.09861
w*;nompC[3],UAS-NompC::GFP/nompC[3];nompC-GAL4	NOMPC:GFP	3	-136.106	0.01841
w*;nompC[3],UAS-NompC::GFP/nompC[3];nompC-GAL4	NOMPC:GFP	3	-35.914	0
w*;nompC[3],UAS-NompC::GFP/nompC[3];nompC-GAL4	NOMPC:GFP	3	11.8035	0.00306
w*;nompC[3],UAS-NompC::GFP/nompC[3];nompC-GAL4	NOMPC:GFP	3	119.806	0
w*;nompC[3],UAS-NompC::GFP/nompC[3];nompC-GAL4	NOMPC:GFP	3	175.997	0.01896
w*;nompC[3],UAS-NompC::GFP/nompC[3];nompC-GAL4	NOMPC:GFP	3	276.191	0.05841
w*;nompC[3],UAS-NompC::GFP/nompC[3];nompC-GAL4	NOMPC:GFP	3	434.231	0.12548
w*;nompC[3],UAS-NompC::GFP/nompC[3];nompC-GAL4	NOMPC:GFP	3	703.379	0.22823
w*;nompC[3],UAS-NompC::GFP/nompC[3];nompC-GAL4	NOMPC:GFP	3	1313.88	0.44664
w*;nompC[3],UAS-NompC::GFP/nompC[3];nompC-GAL4	NOMPC:GFP	3	1854.3	0.61831
w*;nompC[3],UAS-NompC::GFP/nompC[3];nompC-GAL4	NOMPC:GFP	3	2347.35	0.7469
w*;nompC[3],UAS-NompC::GFP/nompC[3];nompC-GAL4	NOMPC:GFP	3	2801.73	0.83468
w*;nompC[3],UAS-NompC::GFP/nompC[3];nompC-GAL4	NOMPC:GFP	3	3250.91	0.92385
w*;nompC[3],UAS-NompC::GFP/nompC[3];nompC-GAL4	NOMPC:GFP	3	4433.42	0.96291
w*;nompC[3],UAS-NompC::GFP/nompC[3];nompC-GAL4	NOMPC:GFP	3	7651.21	0.96153
w*;nompC[3],UAS-NompC::GFP/nompC[3];nompC-GAL4	NOMPC:GFP	3	9697.98	0.95031
w*;nompC[3],UAS-NompC::GFP/nompC[3];nompC-GAL4	NOMPC:GFP	3	13851.6	1
w*;nompC[3],UAS-NompC::GFP/nompC[3];nompC-GAL4	NOMPC:GFP	4	-13343.4	0.88777
w*;nompC[3],UAS-NompC::GFP/nompC[3];nompC-GAL4	NOMPC:GFP	4	-9527.2	0.87014
w*;nompC[3],UAS-NompC::GFP/nompC[3];nompC-GAL4	NOMPC:GFP	4	-7542.52	0.92955
w*;nompC[3],UAS-NompC::GFP/nompC[3];nompC-GAL4	NOMPC:GFP	4	-4391.34	1
w*;nompC[3],UAS-NompC::GFP/nompC[3];nompC-GAL4	NOMPC:GFP	4	-3183.91	0.96432
w*;nompC[3],UAS-NompC::GFP/nompC[3];nompC-GAL4	NOMPC:GFP	4	-2735.64	0.93739
w*;nompC[3],UAS-NompC::GFP/nompC[3];nompC-GAL4	NOMPC:GFP	4	-2272.18	0.84911
w*;nompC[3],UAS-NompC::GFP/nompC[3];nompC-GAL4	NOMPC:GFP	4	-1776.42	0.76464
w*;nompC[3],UAS-NompC::GFP/nompC[3];nompC-GAL4	NOMPC:GFP	4	-1218.59	0.58579
w*;nompC[3],UAS-NompC::GFP/nompC[3];nompC-GAL4	NOMPC:GFP	4	-563.537	0.23019
w*;nompC[3],UAS-NompC::GFP/nompC[3];nompC-GAL4	NOMPC:GFP	4	-290.541	0.06677
w*;nompC[3],UAS-NompC::GFP/nompC[3];nompC-GAL4	NOMPC:GFP	4	-121.169	0.02561
w*;nompC[3],UAS-NompC::GFP/nompC[3];nompC-GAL4	NOMPC:GFP	4	-31.0746	0.02181
w*;nompC[3],UAS-NompC::GFP/nompC[3];nompC-GAL4	NOMPC:GFP	4	9.91941	0
w*;nompC[3],UAS-NompC::GFP/nompC[3];nompC-GAL4	NOMPC:GFP	4	106.705	0
w*;nompC[3],UAS-NompC::GFP/nompC[3];nompC-GAL4	NOMPC:GFP	4	152.862	0.0229
w*;nompC[3],UAS-NompC::GFP/nompC[3];nompC-GAL4	NOMPC:GFP	4	250.586	0.08876
w*;nompC[3],UAS-NompC::GFP/nompC[3];nompC-GAL4	NOMPC:GFP	4	407.028	0.12626
w*;nompC[3],UAS-NompC::GFP/nompC[3];nompC-GAL4	NOMPC:GFP	4	675.299	0.26596
w*;nompC[3],UAS-NompC::GFP/nompC[3];nompC-GAL4	NOMPC:GFP	4	1289.01	0.40522
w*;nompC[3],UAS-NompC::GFP/nompC[3];nompC-GAL4	NOMPC:GFP	4	1842.62	0.49952
w*;nompC[3],UAS-NompC::GFP/nompC[3];nompC-GAL4	NOMPC:GFP	4	2344.65	0.56186
w*;nompC[3],UAS-NompC::GFP/nompC[3];nompC-GAL4	NOMPC:GFP	4	2831.73	0.64684
w*;nompC[3],UAS-NompC::GFP/nompC[3];nompC-GAL4	NOMPC:GFP	4	3266.88	0.70173
w*;nompC[3],UAS-NompC::GFP/nompC[3];nompC-GAL4	NOMPC:GFP	4	4523.37	0.79968
w*;nompC[3],UAS-NompC::GFP/nompC[3];nompC-GAL4	NOMPC:GFP	4	7964.44	0.97255
w*;nompC[3],UAS-NompC::GFP/nompC[3];nompC-GAL4	NOMPC:GFP	4	10142.1	0.98074
w*;nompC[3],UAS-NompC::GFP/nompC[3];nompC-GAL4	NOMPC:GFP	4	14836	1
w*;nompC[3],UAS-NompC::GFP/nompC[3];nompC-GAL4	NOMPC:GFP	5	-11175.6	1
w*;nompC[3],UAS-NompC::GFP/nompC[3];nompC-GAL4	NOMPC:GFP	5	-8058.69	0.98439
w*;nompC[3],UAS-NompC::GFP/nompC[3];nompC-GAL4	NOMPC:GFP	5	-6397.97	0.93792
w*;nompC[3],UAS-NompC::GFP/nompC[3];nompC-GAL4	NOMPC:GFP	5	-3700.24	0.89011
w*;nompC[3],UAS-NompC::GFP/nompC[3];nompC-GAL4	NOMPC:GFP	5	-2705.27	0.81404
w*;nompC[3],UAS-NompC::GFP/nompC[3];nompC-GAL4	NOMPC:GFP	5	-2324.68	0.80242
w*;nompC[3],UAS-NompC::GFP/nompC[3];nompC-GAL4	NOMPC:GFP	5	-1938.44	0.75665
w*;nompC[3],UAS-NompC::GFP/nompC[3];nompC-GAL4	NOMPC:GFP	5	-1542.34	0.70895
w*;nompC[3],UAS-NompC::GFP/nompC[3];nompC-GAL4	NOMPC:GFP	5	-1094.43	0.6344
w*;nompC[3],UAS-NompC::GFP/nompC[3];nompC-GAL4	NOMPC:GFP	5	-567.528	0.39603
w*;nompC[3],UAS-NompC::GFP/nompC[3];nompC-GAL4	NOMPC:GFP	5	-329.598	0.18943
w*;nompC[3],UAS-NompC::GFP/nompC[3];nompC-GAL4	NOMPC:GFP	5	-181.937	0.05309
w*;nompC[3],UAS-NompC::GFP/nompC[3];nompC-GAL4	NOMPC:GFP	5	-93.738	0.01243
w*;nompC[3],UAS-NompC::GFP/nompC[3];nompC-GAL4	NOMPC:GFP	5	-46.5919	0
w*;nompC[3],UAS-NompC::GFP/nompC[3];nompC-GAL4	NOMPC:GFP	5	49.9354	0
w*;nompC[3],UAS-NompC::GFP/nompC[3];nompC-GAL4	NOMPC:GFP	5	97.2206	0.014
w*;nompC[3],UAS-NompC::GFP/nompC[3];nompC-GAL4	NOMPC:GFP	5	183.102	0.06156
w*;nompC[3],UAS-NompC::GFP/nompC[3];nompC-GAL4	NOMPC:GFP	5	331.883	0.20823
w*;nompC[3],UAS-NompC::GFP/nompC[3];nompC-GAL4	NOMPC:GFP	5	566.894	0.40531
w*;nompC[3],UAS-NompC::GFP/nompC[3];nompC-GAL4	NOMPC:GFP	5	1127.57	0.59119
w*;nompC[3],UAS-NompC::GFP/nompC[3];nompC-GAL4	NOMPC:GFP	5	1612.02	0.68689
w*;nompC[3],UAS-NompC::GFP/nompC[3];nompC-GAL4	NOMPC:GFP	5	2053.21	0.73985
w*;nompC[3],UAS-NompC::GFP/nompC[3];nompC-GAL4	NOMPC:GFP	5	2447.54	0.75188
w*;nompC[3],UAS-NompC::GFP/nompC[3];nompC-GAL4	NOMPC:GFP	5	2853.12	0.79628
w*;nompC[3],UAS-NompC::GFP/nompC[3];nompC-GAL4	NOMPC:GFP	5	3907.68	0.85096
w*;nompC[3],UAS-NompC::GFP/nompC[3];nompC-GAL4	NOMPC:GFP	5	6813.09	0.9358
w*;nompC[3],UAS-NompC::GFP/nompC[3];nompC-GAL4	NOMPC:GFP	5	8667.61	0.96076
w*;nompC[3],UAS-NompC::GFP/nompC[3];nompC-GAL4	NOMPC:GFP	5	12319.4	1
w*;nompC[3],UAS-NompC::GFP/nompC[3];nompC-GAL4	NOMPC:GFP	6	-12217.5	0.93424
w*;nompC[3],UAS-NompC::GFP/nompC[3];nompC-GAL4	NOMPC:GFP	6	-8614.9	1
w*;nompC[3],UAS-NompC::GFP/nompC[3];nompC-GAL4	NOMPC:GFP	6	-6772.72	0.83384
w*;nompC[3],UAS-NompC::GFP/nompC[3];nompC-GAL4	NOMPC:GFP	6	-3868.21	0.88817
w*;nompC[3],UAS-NompC::GFP/nompC[3];nompC-GAL4	NOMPC:GFP	6	-2811.35	0.87213
w*;nompC[3],UAS-NompC::GFP/nompC[3];nompC-GAL4	NOMPC:GFP	6	-2420.68	0.8258
w*;nompC[3],UAS-NompC::GFP/nompC[3];nompC-GAL4	NOMPC:GFP	6	-2018.31	0.81735
w*;nompC[3],UAS-NompC::GFP/nompC[3];nompC-GAL4	NOMPC:GFP	6	-1580.86	0.77048
w*;nompC[3],UAS-NompC::GFP/nompC[3];nompC-GAL4	NOMPC:GFP	6	-1104.03	0.72809
w*;nompC[3],UAS-NompC::GFP/nompC[3];nompC-GAL4	NOMPC:GFP	6	-563.677	0.55205
w*;nompC[3],UAS-NompC::GFP/nompC[3];nompC-GAL4	NOMPC:GFP	6	-332.355	0.36373
w*;nompC[3],UAS-NompC::GFP/nompC[3];nompC-GAL4	NOMPC:GFP	6	-193.524	0.15259
w*;nompC[3],UAS-NompC::GFP/nompC[3];nompC-GAL4	NOMPC:GFP	6	-105.26	0.01905
w*;nompC[3],UAS-NompC::GFP/nompC[3];nompC-GAL4	NOMPC:GFP	6	-51.8398	0
w*;nompC[3],UAS-NompC::GFP/nompC[3];nompC-GAL4	NOMPC:GFP	6	54.9803	0
w*;nompC[3],UAS-NompC::GFP/nompC[3];nompC-GAL4	NOMPC:GFP	6	105.032	0.02804
w*;nompC[3],UAS-NompC::GFP/nompC[3];nompC-GAL4	NOMPC:GFP	6	191.303	0.10292
w*;nompC[3],UAS-NompC::GFP/nompC[3];nompC-GAL4	NOMPC:GFP	6	335.681	0.30277
w*;nompC[3],UAS-NompC::GFP/nompC[3];nompC-GAL4	NOMPC:GFP	6	562.956	0.41011
w*;nompC[3],UAS-NompC::GFP/nompC[3];nompC-GAL4	NOMPC:GFP	6	1110.15	0.49669
w*;nompC[3],UAS-NompC::GFP/nompC[3];nompC-GAL4	NOMPC:GFP	6	1581.4	0.58123
w*;nompC[3],UAS-NompC::GFP/nompC[3];nompC-GAL4	NOMPC:GFP	6	2021.85	0.60352
w*;nompC[3],UAS-NompC::GFP/nompC[3];nompC-GAL4	NOMPC:GFP	6	2439.97	0.66213
w*;nompC[3],UAS-NompC::GFP/nompC[3];nompC-GAL4	NOMPC:GFP	6	2834.53	0.65348
w*;nompC[3],UAS-NompC::GFP/nompC[3];nompC-GAL4	NOMPC:GFP	6	3928.9	0.69442
w*;nompC[3],UAS-NompC::GFP/nompC[3];nompC-GAL4	NOMPC:GFP	6	7014.39	0.84681
w*;nompC[3],UAS-NompC::GFP/nompC[3];nompC-GAL4	NOMPC:GFP	6	8977	0.91421
w*;nompC[3],UAS-NompC::GFP/nompC[3];nompC-GAL4	NOMPC:GFP	6	12891.1	1

## Sheet: Fig_2_e
genotype_long	genotype	x_offset_nm		Group	N	Missing	Mean	Std. Deviation	SE of Mean	Anova	DF	Sum of Squares	Mean Square	F Value	Prob>F	Comparison	Mean Difference	SEM	t Value	Prob	Sig	LCL	UCL
w*;nompC[3],UAS-NompC::GFP/nompC[3];nompC-GAL4	NOMPC:GFP	993.54		NOMPC	6	0	1180.36	226.47	92.45	Model	3	57360000	19120000	64.66	3.94e-14	nompC_KO vs. NOMPC:GFP	2724.58	254.65	10.7	1.20557e-11	1	2011.17	3437.99
w*;nompC[3],UAS-NompC::GFP/nompC[3];nompC-GAL4	NOMPC:GFP	1548.16		nompC_KO	19	0	3904.94	626.87	143.81	Error	34	10050000	295703			AR+AR-NOMPC:GFP vs. NOMPC:GFP	-2.55	302.53	-0.0084	1	0	-850.11	845.01
w*;nompC[3],UAS-NompC::GFP/nompC[3];nompC-GAL4	NOMPC:GFP	1210.46		AR+AR-NOMPC	7	0	1177.81	554.42	209.55	Total	37	67410000				AR+AR-NOMPC:GFP vs. nompC_KO	-2727.13	240.43	-11.34	2.52602e-12	1	-3400.7	-2053.56
w*;nompC[3],UAS-NompC::GFP/nompC[3];nompC-GAL4	NOMPC:GFP	1325.53		LH+LH-NOMPC	6	0	2789.97	419.44	171.24							LH+LH-NOMPC:GFP vs. NOMPC:GFP	1609.61	313.95	5.13	7.05578e-05	1	730.06	2489.16
w*;nompC[3],UAS-NompC::GFP/nompC[3];nompC-GAL4	NOMPC:GFP	981.996														LH+LH-NOMPC:GFP vs. nompC_KO	-1114.97	254.65	-4.38	0.000648733	1	-1828.38	-401.56
w*;nompC[3],UAS-NompC::GFP/nompC[3];nompC-GAL4	NOMPC:GFP	1022.48														LH+LH-NOMPC:GFP vs. AR+AR-NOMPC:GFP	1612.16	302.53	5.33	3.85522e-05	1	764.6	2459.72
w*;nompC[3]	nompC_KO	4376.7
w*;nompC[3]	nompC_KO	3516.66		Mann_Whitney_U	Comparison	p-value	p-value (Bonferroni corrected)	Reject Null Hypothesis
w*;nompC[3]	nompC_KO	4423.68		alpha=0.05	NOMPC:GFP vs nompC_KO	1.12931e-05	6.77583e-05	TRUE
w*;nompC[3]	nompC_KO	5007.84			NOMPC:GFP vs AR+AR-NOMPC:GFP	0.730769	1	FALSE
w*;nompC[3]	nompC_KO	4042.59			NOMPC:GFP vs LH+LH-NOMPC:GFP	0.0021645	0.012987	TRUE
w*;nompC[3]	nompC_KO	3584.55			nompC_KO vs AR+AR-NOMPC:GFP	3.04044e-06	1.82426e-05	TRUE
w*;nompC[3]	nompC_KO	4285.91			nompC_KO vs LH+LH-NOMPC:GFP	0.000496894	0.00298137	TRUE
w*;nompC[3]	nompC_KO	2892.63			AR+AR-NOMPC:GFP vs LH+LH-NOMPC:GFP	0.0011655	0.00699301	TRUE
w*;nompC[3]	nompC_KO	5040.06
w*;nompC[3]	nompC_KO	3702.15
w*;nompC[3]	nompC_KO	2905.4
w*;nompC[3]	nompC_KO	4029.56
w*;nompC[3]	nompC_KO	3901.7
w*;nompC[3]	nompC_KO	4005.46
w*;nompC[3]	nompC_KO	4065.7
w*;nompC[3]	nompC_KO	3903.11
w*;nompC[3]	nompC_KO	4335.04
w*;nompC[3]	nompC_KO	3191.99
w*;nompC[3]	nompC_KO	2983.13
w*;nompC[1],UAS-AR+AR-NompC::GFP/nompC[3];nompC-GAL4	AR+AR-NOMPC:GFP	1767.41
w*;nompC[1],UAS-AR+AR-NompC::GFP/nompC[3];nompC-GAL4	AR+AR-NOMPC:GFP	383.798
w*;nompC[1],UAS-AR+AR-NompC::GFP/nompC[3];nompC-GAL4	AR+AR-NOMPC:GFP	581.635
w*;nompC[1],UAS-AR+AR-NompC::GFP/nompC[3];nompC-GAL4	AR+AR-NOMPC:GFP	1083.08
w*;nompC[1],UAS-AR+AR-NompC::GFP/nompC[3];nompC-GAL4	AR+AR-NOMPC:GFP	1679.18
w*;nompC[1],UAS-AR+AR-NompC::GFP/nompC[3];nompC-GAL4	AR+AR-NOMPC:GFP	1668.78
w*;nompC[1],UAS-AR+AR-NompC::GFP/nompC[3];nompC-GAL4	AR+AR-NOMPC:GFP	1080.78
w*;nompC[3],UAS-LH+LH-NompC::GFP/nompC[3];nompC-GAL4	LH+LH-NOMPC:GFP	2142.16
w*;nompC[3],UAS-LH+LH-NompC::GFP/nompC[3];nompC-GAL4	LH+LH-NOMPC:GFP	2754.39
w*;nompC[3],UAS-LH+LH-NompC::GFP/nompC[3];nompC-GAL4	LH+LH-NOMPC:GFP	3372.54
w*;nompC[3],UAS-LH+LH-NompC::GFP/nompC[3];nompC-GAL4	LH+LH-NOMPC:GFP	2715.62
w*;nompC[3],UAS-LH+LH-NompC::GFP/nompC[3];nompC-GAL4	LH+LH-NOMPC:GFP	3099.46
w*;nompC[3],UAS-LH+LH-NompC::GFP/nompC[3];nompC-GAL4	LH+LH-NOMPC:GFP	2655.65

## Sheet: Fig_2_f
genotype_long	genotype	dynamic_range_nm		Group	N	Missing	Mean	Std. Deviation	SE of Mean	Anova	DF	Sum of Squares	Mean Square	F Value	Prob>F	Comparison	Mean Difference	SEM	t Value	Prob	Sig	LCL	UCL
w*;nompC[3],UAS-NompC::GFP/nompC[3];nompC-GAL4	NOMPC:GFP	2862.45		NOMPC:GFP	6	0	3441	902.306	368.365	Model	3	75335100	25111700	18.4021	2.87431e-07	nompC_KO vs. NOMPC:GFP	3242.37	547.043	5.92708	6.42572e-06	1	1709.81	4774.92
w*;nompC[3],UAS-NompC::GFP/nompC[3];nompC-GAL4	NOMPC:GFP	4915.31		nompC_KO	19	0	6683.36	968.708	222.237	Error	34	46396700	1.36461e+06			AR+AR-NOMPC:GFP vs. NOMPC:GFP	335.008	649.907	0.51547	1	0	-1485.72	2155.74
w*;nompC[3],UAS-NompC::GFP/nompC[3];nompC-GAL4	NOMPC:GFP	2397.4		AR+AR-NOMPC:GFP	7	0	3776	1858.18	702.327	Total	37	121732000				AR+AR-NOMPC:GFP vs. nompC_KO	-2907.36	516.493	-5.62903	1.56828e-05	1	-4354.33	-1460.39
w*;nompC[3],UAS-NompC::GFP/nompC[3];nompC-GAL4	NOMPC:GFP	3953.95		LH+LH-NOMPC:GFP	6	0	4721.56	971.362	396.557							LH+LH-NOMPC:GFP vs. NOMPC:GFP	1280.57	674.44	1.89871	0.3967	0	-608.893	3170.03
w*;nompC[3],UAS-NompC::GFP/nompC[3];nompC-GAL4	NOMPC:GFP	2990.48														LH+LH-NOMPC:GFP vs. nompC_KO	-1961.8	547.043	-3.58619	0.00625	1	-3494.35	-429.244
w*;nompC[3],UAS-NompC::GFP/nompC[3];nompC-GAL4	NOMPC:GFP	3526.38		Mann_Whitney_U	Comparison	p-value	p-value (Bonferroni corrected)	Reject Null Hypothesis								LH+LH-NOMPC:GFP vs. AR+AR-NOMPC:GFP	945.559	649.907	1.45492	0.92918	0	-875.17	2766.29
w*;nompC[3]	nompC_KO	7093.41		alpha=0.05	NOMPC:GFP vs nompC_KO	2.26e-05	0.000135517	TRUE
w*;nompC[3]	nompC_KO	6206.04			NOMPC:GFP vs AR+AR-NOMPC:GFP	0.720617	1	FALSE
w*;nompC[3]	nompC_KO	7106.11			NOMPC:GFP vs LH+LH-NOMPC:GFP	0.0649351	0.38961	FALSE
w*;nompC[3]	nompC_KO	8182.6			nompC_KO vs AR+AR-NOMPC:GFP	0.000420535	0.00252321	TRUE
w*;nompC[3]	nompC_KO	7059.97			nompC_KO vs LH+LH-NOMPC:GFP	0.000722756	0.00433653	TRUE
w*;nompC[3]	nompC_KO	5782.39			AR+AR-NOMPC:GFP vs LH+LH-NOMPC:GFP	0.519743	1	FALSE
w*;nompC[3]	nompC_KO	6654.05
w*;nompC[3]	nompC_KO	4724.46
w*;nompC[3]	nompC_KO	8152.79
w*;nompC[3]	nompC_KO	5996.28
w*;nompC[3]	nompC_KO	5498.62
w*;nompC[3]	nompC_KO	7776.84
w*;nompC[3]	nompC_KO	6629.89
w*;nompC[3]	nompC_KO	7812.31
w*;nompC[3]	nompC_KO	7763.31
w*;nompC[3]	nompC_KO	6272.79
w*;nompC[3]	nompC_KO	6473.35
w*;nompC[3]	nompC_KO	6182.73
w*;nompC[3]	nompC_KO	5615.96
w*;nompC[1],UAS-AR+AR-NompC::GFP/nompC[3];nompC-GAL4	AR+AR-NOMPC:GFP	5731.11
w*;nompC[1],UAS-AR+AR-NompC::GFP/nompC[3];nompC-GAL4	AR+AR-NOMPC:GFP	1240.72
w*;nompC[1],UAS-AR+AR-NompC::GFP/nompC[3];nompC-GAL4	AR+AR-NOMPC:GFP	1683.27
w*;nompC[1],UAS-AR+AR-NompC::GFP/nompC[3];nompC-GAL4	AR+AR-NOMPC:GFP	3468.73
w*;nompC[1],UAS-AR+AR-NompC::GFP/nompC[3];nompC-GAL4	AR+AR-NOMPC:GFP	5480.33
w*;nompC[1],UAS-AR+AR-NompC::GFP/nompC[3];nompC-GAL4	AR+AR-NOMPC:GFP	5480.33
w*;nompC[1],UAS-AR+AR-NompC::GFP/nompC[3];nompC-GAL4	AR+AR-NOMPC:GFP	3347.56
w*;nompC[3],UAS-LH+LH-NompC::GFP/nompC[3];nompC-GAL4	LH+LH-NOMPC:GFP	3348.66
w*;nompC[3],UAS-LH+LH-NompC::GFP/nompC[3];nompC-GAL4	LH+LH-NOMPC:GFP	4600.18
w*;nompC[3],UAS-LH+LH-NompC::GFP/nompC[3];nompC-GAL4	LH+LH-NOMPC:GFP	6221.37
w*;nompC[3],UAS-LH+LH-NompC::GFP/nompC[3];nompC-GAL4	LH+LH-NOMPC:GFP	4402.51
w*;nompC[3],UAS-LH+LH-NompC::GFP/nompC[3];nompC-GAL4	LH+LH-NOMPC:GFP	4421.31
w*;nompC[3],UAS-LH+LH-NompC::GFP/nompC[3];nompC-GAL4	LH+LH-NOMPC:GFP	5335.35
