# Supplementary material for: NOMPC ion channel hinge forms a gating spring that initiates mechanosensation
Source: Springer Nature journal article supplement (doi:10.1038/s41593-024-01849-3), 2025-01-06
Supplement: MOESM9 [file 41593_2024_1849_MOESM9_ESM.xlsx]

## Sheet: Fig_3_a_to_d_dyn_fit
genotype_long	genotype	displacement_nm	fit_dynamic_stiffness_kappa_microN*m-1
w*;nompC[3],UAS-NompC::GFP/nompC[3];nompC-GAL4	NOMPC:GFP	-12000	0.07798
w*;nompC[3],UAS-NompC::GFP/nompC[3];nompC-GAL4	NOMPC:GFP	-11435.3	0.07797
w*;nompC[3],UAS-NompC::GFP/nompC[3];nompC-GAL4	NOMPC:GFP	-11008	0.07796
w*;nompC[3],UAS-NompC::GFP/nompC[3];nompC-GAL4	NOMPC:GFP	-10465.2	0.07794
w*;nompC[3],UAS-NompC::GFP/nompC[3];nompC-GAL4	NOMPC:GFP	-10416.2	0.07794
w*;nompC[3],UAS-NompC::GFP/nompC[3];nompC-GAL4	NOMPC:GFP	-10390.4	0.07794
w*;nompC[3],UAS-NompC::GFP/nompC[3];nompC-GAL4	NOMPC:GFP	-10366.4	0.07793
w*;nompC[3],UAS-NompC::GFP/nompC[3];nompC-GAL4	NOMPC:GFP	-10342.3	0.07793
w*;nompC[3],UAS-NompC::GFP/nompC[3];nompC-GAL4	NOMPC:GFP	-10318.3	0.07793
w*;nompC[3],UAS-NompC::GFP/nompC[3];nompC-GAL4	NOMPC:GFP	-10294.3	0.07793
w*;nompC[3],UAS-NompC::GFP/nompC[3];nompC-GAL4	NOMPC:GFP	-10270.3	0.07793
w*;nompC[3],UAS-NompC::GFP/nompC[3];nompC-GAL4	NOMPC:GFP	-10246.2	0.07793
w*;nompC[3],UAS-NompC::GFP/nompC[3];nompC-GAL4	NOMPC:GFP	-10222.2	0.07793
w*;nompC[3],UAS-NompC::GFP/nompC[3];nompC-GAL4	NOMPC:GFP	-10198.2	0.07793
w*;nompC[3],UAS-NompC::GFP/nompC[3];nompC-GAL4	NOMPC:GFP	-10174.2	0.07792
w*;nompC[3],UAS-NompC::GFP/nompC[3];nompC-GAL4	NOMPC:GFP	-10150.2	0.07792
w*;nompC[3],UAS-NompC::GFP/nompC[3];nompC-GAL4	NOMPC:GFP	-10126.1	0.07792
w*;nompC[3],UAS-NompC::GFP/nompC[3];nompC-GAL4	NOMPC:GFP	-10102.1	0.07792
w*;nompC[3],UAS-NompC::GFP/nompC[3];nompC-GAL4	NOMPC:GFP	-10078.1	0.07792
w*;nompC[3],UAS-NompC::GFP/nompC[3];nompC-GAL4	NOMPC:GFP	-10054.1	0.07792
w*;nompC[3],UAS-NompC::GFP/nompC[3];nompC-GAL4	NOMPC:GFP	-10030	0.07792
w*;nompC[3],UAS-NompC::GFP/nompC[3];nompC-GAL4	NOMPC:GFP	-10006	0.07791
w*;nompC[3],UAS-NompC::GFP/nompC[3];nompC-GAL4	NOMPC:GFP	-9981.98	0.07791
w*;nompC[3],UAS-NompC::GFP/nompC[3];nompC-GAL4	NOMPC:GFP	-9957.96	0.07791
w*;nompC[3],UAS-NompC::GFP/nompC[3];nompC-GAL4	NOMPC:GFP	-9933.93	0.07791
w*;nompC[3],UAS-NompC::GFP/nompC[3];nompC-GAL4	NOMPC:GFP	-9909.91	0.07791
w*;nompC[3],UAS-NompC::GFP/nompC[3];nompC-GAL4	NOMPC:GFP	-9885.89	0.07791
w*;nompC[3],UAS-NompC::GFP/nompC[3];nompC-GAL4	NOMPC:GFP	-9861.86	0.07791
w*;nompC[3],UAS-NompC::GFP/nompC[3];nompC-GAL4	NOMPC:GFP	-9837.84	0.0779
w*;nompC[3],UAS-NompC::GFP/nompC[3];nompC-GAL4	NOMPC:GFP	-9813.81	0.0779
w*;nompC[3],UAS-NompC::GFP/nompC[3];nompC-GAL4	NOMPC:GFP	-9789.79	0.0779
w*;nompC[3],UAS-NompC::GFP/nompC[3];nompC-GAL4	NOMPC:GFP	-9765.77	0.0779
w*;nompC[3],UAS-NompC::GFP/nompC[3];nompC-GAL4	NOMPC:GFP	-9741.74	0.0779
w*;nompC[3],UAS-NompC::GFP/nompC[3];nompC-GAL4	NOMPC:GFP	-9717.72	0.07789
w*;nompC[3],UAS-NompC::GFP/nompC[3];nompC-GAL4	NOMPC:GFP	-9693.69	0.07789
w*;nompC[3],UAS-NompC::GFP/nompC[3];nompC-GAL4	NOMPC:GFP	-9669.67	0.07789
w*;nompC[3],UAS-NompC::GFP/nompC[3];nompC-GAL4	NOMPC:GFP	-9645.65	0.07789
w*;nompC[3],UAS-NompC::GFP/nompC[3];nompC-GAL4	NOMPC:GFP	-9621.62	0.07789
w*;nompC[3],UAS-NompC::GFP/nompC[3];nompC-GAL4	NOMPC:GFP	-9617.15	0.07789
w*;nompC[3],UAS-NompC::GFP/nompC[3];nompC-GAL4	NOMPC:GFP	-9597.6	0.07789
w*;nompC[3],UAS-NompC::GFP/nompC[3];nompC-GAL4	NOMPC:GFP	-9573.57	0.07788
w*;nompC[3],UAS-NompC::GFP/nompC[3];nompC-GAL4	NOMPC:GFP	-9549.55	0.07788
w*;nompC[3],UAS-NompC::GFP/nompC[3];nompC-GAL4	NOMPC:GFP	-9525.53	0.07788
w*;nompC[3],UAS-NompC::GFP/nompC[3];nompC-GAL4	NOMPC:GFP	-9501.5	0.07788
w*;nompC[3],UAS-NompC::GFP/nompC[3];nompC-GAL4	NOMPC:GFP	-9477.48	0.07787
w*;nompC[3],UAS-NompC::GFP/nompC[3];nompC-GAL4	NOMPC:GFP	-9453.45	0.07787
w*;nompC[3],UAS-NompC::GFP/nompC[3];nompC-GAL4	NOMPC:GFP	-9429.43	0.07787
w*;nompC[3],UAS-NompC::GFP/nompC[3];nompC-GAL4	NOMPC:GFP	-9405.41	0.07787
w*;nompC[3],UAS-NompC::GFP/nompC[3];nompC-GAL4	NOMPC:GFP	-9381.38	0.07787
w*;nompC[3],UAS-NompC::GFP/nompC[3];nompC-GAL4	NOMPC:GFP	-9357.36	0.07786
w*;nompC[3],UAS-NompC::GFP/nompC[3];nompC-GAL4	NOMPC:GFP	-9333.33	0.07786
w*;nompC[3],UAS-NompC::GFP/nompC[3];nompC-GAL4	NOMPC:GFP	-9309.31	0.07786
w*;nompC[3],UAS-NompC::GFP/nompC[3];nompC-GAL4	NOMPC:GFP	-9285.29	0.07786
w*;nompC[3],UAS-NompC::GFP/nompC[3];nompC-GAL4	NOMPC:GFP	-9261.26	0.07785
w*;nompC[3],UAS-NompC::GFP/nompC[3];nompC-GAL4	NOMPC:GFP	-9237.24	0.07785
w*;nompC[3],UAS-NompC::GFP/nompC[3];nompC-GAL4	NOMPC:GFP	-9213.21	0.07785
w*;nompC[3],UAS-NompC::GFP/nompC[3];nompC-GAL4	NOMPC:GFP	-9189.19	0.07785
w*;nompC[3],UAS-NompC::GFP/nompC[3];nompC-GAL4	NOMPC:GFP	-9165.17	0.07784
w*;nompC[3],UAS-NompC::GFP/nompC[3];nompC-GAL4	NOMPC:GFP	-9141.14	0.07784
w*;nompC[3],UAS-NompC::GFP/nompC[3];nompC-GAL4	NOMPC:GFP	-9117.12	0.07784
w*;nompC[3],UAS-NompC::GFP/nompC[3];nompC-GAL4	NOMPC:GFP	-9093.09	0.07783
w*;nompC[3],UAS-NompC::GFP/nompC[3];nompC-GAL4	NOMPC:GFP	-9069.07	0.07783
w*;nompC[3],UAS-NompC::GFP/nompC[3];nompC-GAL4	NOMPC:GFP	-9045.05	0.07783
w*;nompC[3],UAS-NompC::GFP/nompC[3];nompC-GAL4	NOMPC:GFP	-9021.02	0.07783
w*;nompC[3],UAS-NompC::GFP/nompC[3];nompC-GAL4	NOMPC:GFP	-8997	0.07782
w*;nompC[3],UAS-NompC::GFP/nompC[3];nompC-GAL4	NOMPC:GFP	-8972.97	0.07782
w*;nompC[3],UAS-NompC::GFP/nompC[3];nompC-GAL4	NOMPC:GFP	-8948.95	0.07782
w*;nompC[3],UAS-NompC::GFP/nompC[3];nompC-GAL4	NOMPC:GFP	-8924.92	0.07781
w*;nompC[3],UAS-NompC::GFP/nompC[3];nompC-GAL4	NOMPC:GFP	-8900.9	0.07781
w*;nompC[3],UAS-NompC::GFP/nompC[3];nompC-GAL4	NOMPC:GFP	-8876.88	0.07781
w*;nompC[3],UAS-NompC::GFP/nompC[3];nompC-GAL4	NOMPC:GFP	-8852.85	0.0778
w*;nompC[3],UAS-NompC::GFP/nompC[3];nompC-GAL4	NOMPC:GFP	-8828.83	0.0778
w*;nompC[3],UAS-NompC::GFP/nompC[3];nompC-GAL4	NOMPC:GFP	-8804.8	0.0778
w*;nompC[3],UAS-NompC::GFP/nompC[3];nompC-GAL4	NOMPC:GFP	-8780.78	0.07779
w*;nompC[3],UAS-NompC::GFP/nompC[3];nompC-GAL4	NOMPC:GFP	-8756.76	0.07779
w*;nompC[3],UAS-NompC::GFP/nompC[3];nompC-GAL4	NOMPC:GFP	-8732.73	0.07778
w*;nompC[3],UAS-NompC::GFP/nompC[3];nompC-GAL4	NOMPC:GFP	-8708.71	0.07778
w*;nompC[3],UAS-NompC::GFP/nompC[3];nompC-GAL4	NOMPC:GFP	-8684.68	0.07778
w*;nompC[3],UAS-NompC::GFP/nompC[3];nompC-GAL4	NOMPC:GFP	-8660.66	0.07777
w*;nompC[3],UAS-NompC::GFP/nompC[3];nompC-GAL4	NOMPC:GFP	-8636.64	0.07777
w*;nompC[3],UAS-NompC::GFP/nompC[3];nompC-GAL4	NOMPC:GFP	-8612.61	0.07776
w*;nompC[3],UAS-NompC::GFP/nompC[3];nompC-GAL4	NOMPC:GFP	-8588.59	0.07776
w*;nompC[3],UAS-NompC::GFP/nompC[3];nompC-GAL4	NOMPC:GFP	-8564.56	0.07776
w*;nompC[3],UAS-NompC::GFP/nompC[3];nompC-GAL4	NOMPC:GFP	-8540.54	0.07775
w*;nompC[3],UAS-NompC::GFP/nompC[3];nompC-GAL4	NOMPC:GFP	-8534.86	0.07775
w*;nompC[3],UAS-NompC::GFP/nompC[3];nompC-GAL4	NOMPC:GFP	-8516.52	0.07775
w*;nompC[3],UAS-NompC::GFP/nompC[3];nompC-GAL4	NOMPC:GFP	-8492.49	0.07774
w*;nompC[3],UAS-NompC::GFP/nompC[3];nompC-GAL4	NOMPC:GFP	-8468.47	0.07774
w*;nompC[3],UAS-NompC::GFP/nompC[3];nompC-GAL4	NOMPC:GFP	-8444.44	0.07773
w*;nompC[3],UAS-NompC::GFP/nompC[3];nompC-GAL4	NOMPC:GFP	-8420.42	0.07773
w*;nompC[3],UAS-NompC::GFP/nompC[3];nompC-GAL4	NOMPC:GFP	-8396.4	0.07772
w*;nompC[3],UAS-NompC::GFP/nompC[3];nompC-GAL4	NOMPC:GFP	-8372.37	0.07772
w*;nompC[3],UAS-NompC::GFP/nompC[3];nompC-GAL4	NOMPC:GFP	-8348.35	0.07771
w*;nompC[3],UAS-NompC::GFP/nompC[3];nompC-GAL4	NOMPC:GFP	-8324.32	0.07771
w*;nompC[3],UAS-NompC::GFP/nompC[3];nompC-GAL4	NOMPC:GFP	-8300.3	0.0777
w*;nompC[3],UAS-NompC::GFP/nompC[3];nompC-GAL4	NOMPC:GFP	-8276.28	0.0777
w*;nompC[3],UAS-NompC::GFP/nompC[3];nompC-GAL4	NOMPC:GFP	-8252.25	0.07769
w*;nompC[3],UAS-NompC::GFP/nompC[3];nompC-GAL4	NOMPC:GFP	-8228.23	0.07769
w*;nompC[3],UAS-NompC::GFP/nompC[3];nompC-GAL4	NOMPC:GFP	-8204.2	0.07768
w*;nompC[3],UAS-NompC::GFP/nompC[3];nompC-GAL4	NOMPC:GFP	-8180.18	0.07768
w*;nompC[3],UAS-NompC::GFP/nompC[3];nompC-GAL4	NOMPC:GFP	-8156.16	0.07767
w*;nompC[3],UAS-NompC::GFP/nompC[3];nompC-GAL4	NOMPC:GFP	-8132.13	0.07767
w*;nompC[3],UAS-NompC::GFP/nompC[3];nompC-GAL4	NOMPC:GFP	-8108.11	0.07766
w*;nompC[3],UAS-NompC::GFP/nompC[3];nompC-GAL4	NOMPC:GFP	-8084.08	0.07765
w*;nompC[3],UAS-NompC::GFP/nompC[3];nompC-GAL4	NOMPC:GFP	-8060.06	0.07765
w*;nompC[3],UAS-NompC::GFP/nompC[3];nompC-GAL4	NOMPC:GFP	-8036.04	0.07764
w*;nompC[3],UAS-NompC::GFP/nompC[3];nompC-GAL4	NOMPC:GFP	-8012.01	0.07764
w*;nompC[3],UAS-NompC::GFP/nompC[3];nompC-GAL4	NOMPC:GFP	-7987.99	0.07763
w*;nompC[3],UAS-NompC::GFP/nompC[3];nompC-GAL4	NOMPC:GFP	-7963.96	0.07762
w*;nompC[3],UAS-NompC::GFP/nompC[3];nompC-GAL4	NOMPC:GFP	-7939.94	0.07762
w*;nompC[3],UAS-NompC::GFP/nompC[3];nompC-GAL4	NOMPC:GFP	-7915.92	0.07761
w*;nompC[3],UAS-NompC::GFP/nompC[3];nompC-GAL4	NOMPC:GFP	-7891.89	0.0776
w*;nompC[3],UAS-NompC::GFP/nompC[3];nompC-GAL4	NOMPC:GFP	-7891.43	0.0776
w*;nompC[3],UAS-NompC::GFP/nompC[3];nompC-GAL4	NOMPC:GFP	-7867.87	0.0776
w*;nompC[3],UAS-NompC::GFP/nompC[3];nompC-GAL4	NOMPC:GFP	-7843.84	0.07759
w*;nompC[3],UAS-NompC::GFP/nompC[3];nompC-GAL4	NOMPC:GFP	-7819.82	0.07758
w*;nompC[3],UAS-NompC::GFP/nompC[3];nompC-GAL4	NOMPC:GFP	-7795.8	0.07757
w*;nompC[3],UAS-NompC::GFP/nompC[3];nompC-GAL4	NOMPC:GFP	-7771.77	0.07757
w*;nompC[3],UAS-NompC::GFP/nompC[3];nompC-GAL4	NOMPC:GFP	-7747.75	0.07756
w*;nompC[3],UAS-NompC::GFP/nompC[3];nompC-GAL4	NOMPC:GFP	-7723.72	0.07755
w*;nompC[3],UAS-NompC::GFP/nompC[3];nompC-GAL4	NOMPC:GFP	-7699.7	0.07754
w*;nompC[3],UAS-NompC::GFP/nompC[3];nompC-GAL4	NOMPC:GFP	-7693.81	0.07754
w*;nompC[3],UAS-NompC::GFP/nompC[3];nompC-GAL4	NOMPC:GFP	-7675.68	0.07753
w*;nompC[3],UAS-NompC::GFP/nompC[3];nompC-GAL4	NOMPC:GFP	-7651.65	0.07753
w*;nompC[3],UAS-NompC::GFP/nompC[3];nompC-GAL4	NOMPC:GFP	-7627.63	0.07752
w*;nompC[3],UAS-NompC::GFP/nompC[3];nompC-GAL4	NOMPC:GFP	-7603.6	0.07751
w*;nompC[3],UAS-NompC::GFP/nompC[3];nompC-GAL4	NOMPC:GFP	-7579.58	0.0775
w*;nompC[3],UAS-NompC::GFP/nompC[3];nompC-GAL4	NOMPC:GFP	-7555.56	0.07749
w*;nompC[3],UAS-NompC::GFP/nompC[3];nompC-GAL4	NOMPC:GFP	-7531.53	0.07748
w*;nompC[3],UAS-NompC::GFP/nompC[3];nompC-GAL4	NOMPC:GFP	-7507.51	0.07747
w*;nompC[3],UAS-NompC::GFP/nompC[3];nompC-GAL4	NOMPC:GFP	-7483.48	0.07746
w*;nompC[3],UAS-NompC::GFP/nompC[3];nompC-GAL4	NOMPC:GFP	-7459.46	0.07746
w*;nompC[3],UAS-NompC::GFP/nompC[3];nompC-GAL4	NOMPC:GFP	-7435.44	0.07745
w*;nompC[3],UAS-NompC::GFP/nompC[3];nompC-GAL4	NOMPC:GFP	-7411.41	0.07744
w*;nompC[3],UAS-NompC::GFP/nompC[3];nompC-GAL4	NOMPC:GFP	-7387.39	0.07743
w*;nompC[3],UAS-NompC::GFP/nompC[3];nompC-GAL4	NOMPC:GFP	-7363.36	0.07742
w*;nompC[3],UAS-NompC::GFP/nompC[3];nompC-GAL4	NOMPC:GFP	-7339.34	0.07741
w*;nompC[3],UAS-NompC::GFP/nompC[3];nompC-GAL4	NOMPC:GFP	-7315.32	0.0774
w*;nompC[3],UAS-NompC::GFP/nompC[3];nompC-GAL4	NOMPC:GFP	-7291.29	0.07738
w*;nompC[3],UAS-NompC::GFP/nompC[3];nompC-GAL4	NOMPC:GFP	-7267.27	0.07737
w*;nompC[3],UAS-NompC::GFP/nompC[3];nompC-GAL4	NOMPC:GFP	-7243.24	0.07736
w*;nompC[3],UAS-NompC::GFP/nompC[3];nompC-GAL4	NOMPC:GFP	-7228.33	0.07736
w*;nompC[3],UAS-NompC::GFP/nompC[3];nompC-GAL4	NOMPC:GFP	-7219.22	0.07735
w*;nompC[3],UAS-NompC::GFP/nompC[3];nompC-GAL4	NOMPC:GFP	-7195.2	0.07734
w*;nompC[3],UAS-NompC::GFP/nompC[3];nompC-GAL4	NOMPC:GFP	-7171.17	0.07733
w*;nompC[3],UAS-NompC::GFP/nompC[3];nompC-GAL4	NOMPC:GFP	-7147.15	0.07732
w*;nompC[3],UAS-NompC::GFP/nompC[3];nompC-GAL4	NOMPC:GFP	-7123.12	0.0773
w*;nompC[3],UAS-NompC::GFP/nompC[3];nompC-GAL4	NOMPC:GFP	-7099.1	0.07729
w*;nompC[3],UAS-NompC::GFP/nompC[3];nompC-GAL4	NOMPC:GFP	-7075.08	0.07728
w*;nompC[3],UAS-NompC::GFP/nompC[3];nompC-GAL4	NOMPC:GFP	-7051.05	0.07727
w*;nompC[3],UAS-NompC::GFP/nompC[3];nompC-GAL4	NOMPC:GFP	-7027.03	0.07725
w*;nompC[3],UAS-NompC::GFP/nompC[3];nompC-GAL4	NOMPC:GFP	-7003	0.07724
w*;nompC[3],UAS-NompC::GFP/nompC[3];nompC-GAL4	NOMPC:GFP	-6978.98	0.07723
w*;nompC[3],UAS-NompC::GFP/nompC[3];nompC-GAL4	NOMPC:GFP	-6954.95	0.07721
w*;nompC[3],UAS-NompC::GFP/nompC[3];nompC-GAL4	NOMPC:GFP	-6930.93	0.0772
w*;nompC[3],UAS-NompC::GFP/nompC[3];nompC-GAL4	NOMPC:GFP	-6906.91	0.07719
w*;nompC[3],UAS-NompC::GFP/nompC[3];nompC-GAL4	NOMPC:GFP	-6882.88	0.07717
w*;nompC[3],UAS-NompC::GFP/nompC[3];nompC-GAL4	NOMPC:GFP	-6858.86	0.07716
w*;nompC[3],UAS-NompC::GFP/nompC[3];nompC-GAL4	NOMPC:GFP	-6834.83	0.07714
w*;nompC[3],UAS-NompC::GFP/nompC[3];nompC-GAL4	NOMPC:GFP	-6810.81	0.07713
w*;nompC[3],UAS-NompC::GFP/nompC[3];nompC-GAL4	NOMPC:GFP	-6786.79	0.07711
w*;nompC[3],UAS-NompC::GFP/nompC[3];nompC-GAL4	NOMPC:GFP	-6762.76	0.0771
w*;nompC[3],UAS-NompC::GFP/nompC[3];nompC-GAL4	NOMPC:GFP	-6738.74	0.07708
w*;nompC[3],UAS-NompC::GFP/nompC[3];nompC-GAL4	NOMPC:GFP	-6714.71	0.07707
w*;nompC[3],UAS-NompC::GFP/nompC[3];nompC-GAL4	NOMPC:GFP	-6690.69	0.07705
w*;nompC[3],UAS-NompC::GFP/nompC[3];nompC-GAL4	NOMPC:GFP	-6666.67	0.07703
w*;nompC[3],UAS-NompC::GFP/nompC[3];nompC-GAL4	NOMPC:GFP	-6642.64	0.07702
w*;nompC[3],UAS-NompC::GFP/nompC[3];nompC-GAL4	NOMPC:GFP	-6618.62	0.077
w*;nompC[3],UAS-NompC::GFP/nompC[3];nompC-GAL4	NOMPC:GFP	-6594.59	0.07698
w*;nompC[3],UAS-NompC::GFP/nompC[3];nompC-GAL4	NOMPC:GFP	-6570.57	0.07696
w*;nompC[3],UAS-NompC::GFP/nompC[3];nompC-GAL4	NOMPC:GFP	-6546.55	0.07695
w*;nompC[3],UAS-NompC::GFP/nompC[3];nompC-GAL4	NOMPC:GFP	-6522.52	0.07693
w*;nompC[3],UAS-NompC::GFP/nompC[3];nompC-GAL4	NOMPC:GFP	-6498.5	0.07691
w*;nompC[3],UAS-NompC::GFP/nompC[3];nompC-GAL4	NOMPC:GFP	-6474.47	0.07689
w*;nompC[3],UAS-NompC::GFP/nompC[3];nompC-GAL4	NOMPC:GFP	-6450.45	0.07687
w*;nompC[3],UAS-NompC::GFP/nompC[3];nompC-GAL4	NOMPC:GFP	-6426.43	0.07685
w*;nompC[3],UAS-NompC::GFP/nompC[3];nompC-GAL4	NOMPC:GFP	-6402.4	0.07683
w*;nompC[3],UAS-NompC::GFP/nompC[3];nompC-GAL4	NOMPC:GFP	-6378.38	0.07681
w*;nompC[3],UAS-NompC::GFP/nompC[3];nompC-GAL4	NOMPC:GFP	-6354.35	0.07679
w*;nompC[3],UAS-NompC::GFP/nompC[3];nompC-GAL4	NOMPC:GFP	-6330.33	0.07677
w*;nompC[3],UAS-NompC::GFP/nompC[3];nompC-GAL4	NOMPC:GFP	-6306.31	0.07675
w*;nompC[3],UAS-NompC::GFP/nompC[3];nompC-GAL4	NOMPC:GFP	-6282.28	0.07673
w*;nompC[3],UAS-NompC::GFP/nompC[3];nompC-GAL4	NOMPC:GFP	-6258.26	0.0767
w*;nompC[3],UAS-NompC::GFP/nompC[3];nompC-GAL4	NOMPC:GFP	-6234.23	0.07668
w*;nompC[3],UAS-NompC::GFP/nompC[3];nompC-GAL4	NOMPC:GFP	-6210.21	0.07666
w*;nompC[3],UAS-NompC::GFP/nompC[3];nompC-GAL4	NOMPC:GFP	-6186.19	0.07663
w*;nompC[3],UAS-NompC::GFP/nompC[3];nompC-GAL4	NOMPC:GFP	-6162.16	0.07661
w*;nompC[3],UAS-NompC::GFP/nompC[3];nompC-GAL4	NOMPC:GFP	-6138.14	0.07659
w*;nompC[3],UAS-NompC::GFP/nompC[3];nompC-GAL4	NOMPC:GFP	-6114.11	0.07656
w*;nompC[3],UAS-NompC::GFP/nompC[3];nompC-GAL4	NOMPC:GFP	-6090.09	0.07654
w*;nompC[3],UAS-NompC::GFP/nompC[3];nompC-GAL4	NOMPC:GFP	-6066.07	0.07651
w*;nompC[3],UAS-NompC::GFP/nompC[3];nompC-GAL4	NOMPC:GFP	-6042.04	0.07649
w*;nompC[3],UAS-NompC::GFP/nompC[3];nompC-GAL4	NOMPC:GFP	-6018.02	0.07646
w*;nompC[3],UAS-NompC::GFP/nompC[3];nompC-GAL4	NOMPC:GFP	-5993.99	0.07643
w*;nompC[3],UAS-NompC::GFP/nompC[3];nompC-GAL4	NOMPC:GFP	-5969.97	0.07641
w*;nompC[3],UAS-NompC::GFP/nompC[3];nompC-GAL4	NOMPC:GFP	-5966.93	0.0764
w*;nompC[3],UAS-NompC::GFP/nompC[3];nompC-GAL4	NOMPC:GFP	-5945.95	0.07638
w*;nompC[3],UAS-NompC::GFP/nompC[3];nompC-GAL4	NOMPC:GFP	-5921.92	0.07635
w*;nompC[3],UAS-NompC::GFP/nompC[3];nompC-GAL4	NOMPC:GFP	-5897.9	0.07632
w*;nompC[3],UAS-NompC::GFP/nompC[3];nompC-GAL4	NOMPC:GFP	-5873.87	0.07629
w*;nompC[3],UAS-NompC::GFP/nompC[3];nompC-GAL4	NOMPC:GFP	-5849.85	0.07626
w*;nompC[3],UAS-NompC::GFP/nompC[3];nompC-GAL4	NOMPC:GFP	-5825.83	0.07623
w*;nompC[3],UAS-NompC::GFP/nompC[3];nompC-GAL4	NOMPC:GFP	-5801.8	0.0762
w*;nompC[3],UAS-NompC::GFP/nompC[3];nompC-GAL4	NOMPC:GFP	-5777.78	0.07617
w*;nompC[3],UAS-NompC::GFP/nompC[3];nompC-GAL4	NOMPC:GFP	-5753.75	0.07614
w*;nompC[3],UAS-NompC::GFP/nompC[3];nompC-GAL4	NOMPC:GFP	-5729.73	0.07611
w*;nompC[3],UAS-NompC::GFP/nompC[3];nompC-GAL4	NOMPC:GFP	-5705.71	0.07608
w*;nompC[3],UAS-NompC::GFP/nompC[3];nompC-GAL4	NOMPC:GFP	-5681.68	0.07604
w*;nompC[3],UAS-NompC::GFP/nompC[3];nompC-GAL4	NOMPC:GFP	-5657.66	0.07601
w*;nompC[3],UAS-NompC::GFP/nompC[3];nompC-GAL4	NOMPC:GFP	-5653.43	0.076
w*;nompC[3],UAS-NompC::GFP/nompC[3];nompC-GAL4	NOMPC:GFP	-5633.63	0.07598
w*;nompC[3],UAS-NompC::GFP/nompC[3];nompC-GAL4	NOMPC:GFP	-5609.61	0.07594
w*;nompC[3],UAS-NompC::GFP/nompC[3];nompC-GAL4	NOMPC:GFP	-5585.59	0.07591
w*;nompC[3],UAS-NompC::GFP/nompC[3];nompC-GAL4	NOMPC:GFP	-5561.56	0.07587
w*;nompC[3],UAS-NompC::GFP/nompC[3];nompC-GAL4	NOMPC:GFP	-5546.47	0.07585
w*;nompC[3],UAS-NompC::GFP/nompC[3];nompC-GAL4	NOMPC:GFP	-5537.54	0.07583
w*;nompC[3],UAS-NompC::GFP/nompC[3];nompC-GAL4	NOMPC:GFP	-5513.51	0.0758
w*;nompC[3],UAS-NompC::GFP/nompC[3];nompC-GAL4	NOMPC:GFP	-5489.49	0.07576
w*;nompC[3],UAS-NompC::GFP/nompC[3];nompC-GAL4	NOMPC:GFP	-5465.47	0.07572
w*;nompC[3],UAS-NompC::GFP/nompC[3];nompC-GAL4	NOMPC:GFP	-5441.44	0.07568
w*;nompC[3],UAS-NompC::GFP/nompC[3];nompC-GAL4	NOMPC:GFP	-5417.42	0.07564
w*;nompC[3],UAS-NompC::GFP/nompC[3];nompC-GAL4	NOMPC:GFP	-5393.39	0.0756
w*;nompC[3],UAS-NompC::GFP/nompC[3];nompC-GAL4	NOMPC:GFP	-5369.37	0.07556
w*;nompC[3],UAS-NompC::GFP/nompC[3];nompC-GAL4	NOMPC:GFP	-5345.35	0.07552
w*;nompC[3],UAS-NompC::GFP/nompC[3];nompC-GAL4	NOMPC:GFP	-5321.32	0.07548
w*;nompC[3],UAS-NompC::GFP/nompC[3];nompC-GAL4	NOMPC:GFP	-5320.47	0.07548
w*;nompC[3],UAS-NompC::GFP/nompC[3];nompC-GAL4	NOMPC:GFP	-5297.3	0.07543
w*;nompC[3],UAS-NompC::GFP/nompC[3];nompC-GAL4	NOMPC:GFP	-5273.27	0.07539
w*;nompC[3],UAS-NompC::GFP/nompC[3];nompC-GAL4	NOMPC:GFP	-5249.25	0.07535
w*;nompC[3],UAS-NompC::GFP/nompC[3];nompC-GAL4	NOMPC:GFP	-5225.23	0.0753
w*;nompC[3],UAS-NompC::GFP/nompC[3];nompC-GAL4	NOMPC:GFP	-5201.2	0.07526
w*;nompC[3],UAS-NompC::GFP/nompC[3];nompC-GAL4	NOMPC:GFP	-5177.18	0.07521
w*;nompC[3],UAS-NompC::GFP/nompC[3];nompC-GAL4	NOMPC:GFP	-5153.15	0.07516
w*;nompC[3],UAS-NompC::GFP/nompC[3];nompC-GAL4	NOMPC:GFP	-5129.13	0.07511
w*;nompC[3],UAS-NompC::GFP/nompC[3];nompC-GAL4	NOMPC:GFP	-5105.11	0.07507
w*;nompC[3],UAS-NompC::GFP/nompC[3];nompC-GAL4	NOMPC:GFP	-5081.08	0.07502
w*;nompC[3],UAS-NompC::GFP/nompC[3];nompC-GAL4	NOMPC:GFP	-5057.06	0.07497
w*;nompC[3],UAS-NompC::GFP/nompC[3];nompC-GAL4	NOMPC:GFP	-5049.1	0.07495
w*;nompC[3],UAS-NompC::GFP/nompC[3];nompC-GAL4	NOMPC:GFP	-5033.03	0.07491
w*;nompC[3],UAS-NompC::GFP/nompC[3];nompC-GAL4	NOMPC:GFP	-5009.01	0.07486
w*;nompC[3],UAS-NompC::GFP/nompC[3];nompC-GAL4	NOMPC:GFP	-4984.98	0.07481
w*;nompC[3],UAS-NompC::GFP/nompC[3];nompC-GAL4	NOMPC:GFP	-4960.96	0.07476
w*;nompC[3],UAS-NompC::GFP/nompC[3];nompC-GAL4	NOMPC:GFP	-4936.94	0.0747
w*;nompC[3],UAS-NompC::GFP/nompC[3];nompC-GAL4	NOMPC:GFP	-4912.91	0.07465
w*;nompC[3],UAS-NompC::GFP/nompC[3];nompC-GAL4	NOMPC:GFP	-4888.89	0.07459
w*;nompC[3],UAS-NompC::GFP/nompC[3];nompC-GAL4	NOMPC:GFP	-4864.86	0.07453
w*;nompC[3],UAS-NompC::GFP/nompC[3];nompC-GAL4	NOMPC:GFP	-4840.84	0.07447
w*;nompC[3],UAS-NompC::GFP/nompC[3];nompC-GAL4	NOMPC:GFP	-4816.82	0.07442
w*;nompC[3],UAS-NompC::GFP/nompC[3];nompC-GAL4	NOMPC:GFP	-4792.79	0.07436
w*;nompC[3],UAS-NompC::GFP/nompC[3];nompC-GAL4	NOMPC:GFP	-4768.77	0.07429
w*;nompC[3],UAS-NompC::GFP/nompC[3];nompC-GAL4	NOMPC:GFP	-4744.74	0.07423
w*;nompC[3],UAS-NompC::GFP/nompC[3];nompC-GAL4	NOMPC:GFP	-4720.72	0.07417
w*;nompC[3],UAS-NompC::GFP/nompC[3];nompC-GAL4	NOMPC:GFP	-4696.7	0.07411
w*;nompC[3],UAS-NompC::GFP/nompC[3];nompC-GAL4	NOMPC:GFP	-4672.67	0.07404
w*;nompC[3],UAS-NompC::GFP/nompC[3];nompC-GAL4	NOMPC:GFP	-4648.65	0.07398
w*;nompC[3],UAS-NompC::GFP/nompC[3];nompC-GAL4	NOMPC:GFP	-4624.62	0.07391
w*;nompC[3],UAS-NompC::GFP/nompC[3];nompC-GAL4	NOMPC:GFP	-4600.6	0.07384
w*;nompC[3],UAS-NompC::GFP/nompC[3];nompC-GAL4	NOMPC:GFP	-4576.58	0.07377
w*;nompC[3],UAS-NompC::GFP/nompC[3];nompC-GAL4	NOMPC:GFP	-4552.55	0.0737
w*;nompC[3],UAS-NompC::GFP/nompC[3];nompC-GAL4	NOMPC:GFP	-4528.53	0.07363
w*;nompC[3],UAS-NompC::GFP/nompC[3];nompC-GAL4	NOMPC:GFP	-4504.5	0.07356
w*;nompC[3],UAS-NompC::GFP/nompC[3];nompC-GAL4	NOMPC:GFP	-4480.48	0.07349
w*;nompC[3],UAS-NompC::GFP/nompC[3];nompC-GAL4	NOMPC:GFP	-4456.46	0.07341
w*;nompC[3],UAS-NompC::GFP/nompC[3];nompC-GAL4	NOMPC:GFP	-4432.43	0.07334
w*;nompC[3],UAS-NompC::GFP/nompC[3];nompC-GAL4	NOMPC:GFP	-4408.41	0.07326
w*;nompC[3],UAS-NompC::GFP/nompC[3];nompC-GAL4	NOMPC:GFP	-4384.38	0.07318
w*;nompC[3],UAS-NompC::GFP/nompC[3];nompC-GAL4	NOMPC:GFP	-4360.36	0.07311
w*;nompC[3],UAS-NompC::GFP/nompC[3];nompC-GAL4	NOMPC:GFP	-4336.34	0.07303
w*;nompC[3],UAS-NompC::GFP/nompC[3];nompC-GAL4	NOMPC:GFP	-4312.31	0.07294
w*;nompC[3],UAS-NompC::GFP/nompC[3];nompC-GAL4	NOMPC:GFP	-4288.29	0.07286
w*;nompC[3],UAS-NompC::GFP/nompC[3];nompC-GAL4	NOMPC:GFP	-4264.26	0.07278
w*;nompC[3],UAS-NompC::GFP/nompC[3];nompC-GAL4	NOMPC:GFP	-4240.24	0.07269
w*;nompC[3],UAS-NompC::GFP/nompC[3];nompC-GAL4	NOMPC:GFP	-4216.22	0.07261
w*;nompC[3],UAS-NompC::GFP/nompC[3];nompC-GAL4	NOMPC:GFP	-4192.19	0.07252
w*;nompC[3],UAS-NompC::GFP/nompC[3];nompC-GAL4	NOMPC:GFP	-4168.17	0.07243
w*;nompC[3],UAS-NompC::GFP/nompC[3];nompC-GAL4	NOMPC:GFP	-4144.14	0.07234
w*;nompC[3],UAS-NompC::GFP/nompC[3];nompC-GAL4	NOMPC:GFP	-4120.12	0.07225
w*;nompC[3],UAS-NompC::GFP/nompC[3];nompC-GAL4	NOMPC:GFP	-4096.1	0.07216
w*;nompC[3],UAS-NompC::GFP/nompC[3];nompC-GAL4	NOMPC:GFP	-4072.07	0.07207
w*;nompC[3],UAS-NompC::GFP/nompC[3];nompC-GAL4	NOMPC:GFP	-4048.05	0.07197
w*;nompC[3],UAS-NompC::GFP/nompC[3];nompC-GAL4	NOMPC:GFP	-4024.02	0.07188
w*;nompC[3],UAS-NompC::GFP/nompC[3];nompC-GAL4	NOMPC:GFP	-4000	0.07178
w*;nompC[3],UAS-NompC::GFP/nompC[3];nompC-GAL4	NOMPC:GFP	-3975.98	0.07168
w*;nompC[3],UAS-NompC::GFP/nompC[3];nompC-GAL4	NOMPC:GFP	-3951.95	0.07158
w*;nompC[3],UAS-NompC::GFP/nompC[3];nompC-GAL4	NOMPC:GFP	-3927.93	0.07148
w*;nompC[3],UAS-NompC::GFP/nompC[3];nompC-GAL4	NOMPC:GFP	-3903.9	0.07137
w*;nompC[3],UAS-NompC::GFP/nompC[3];nompC-GAL4	NOMPC:GFP	-3879.88	0.07127
w*;nompC[3],UAS-NompC::GFP/nompC[3];nompC-GAL4	NOMPC:GFP	-3855.86	0.07116
w*;nompC[3],UAS-NompC::GFP/nompC[3];nompC-GAL4	NOMPC:GFP	-3831.83	0.07106
w*;nompC[3],UAS-NompC::GFP/nompC[3];nompC-GAL4	NOMPC:GFP	-3807.81	0.07095
w*;nompC[3],UAS-NompC::GFP/nompC[3];nompC-GAL4	NOMPC:GFP	-3787.63	0.07085
w*;nompC[3],UAS-NompC::GFP/nompC[3];nompC-GAL4	NOMPC:GFP	-3783.78	0.07084
w*;nompC[3],UAS-NompC::GFP/nompC[3];nompC-GAL4	NOMPC:GFP	-3759.76	0.07073
w*;nompC[3],UAS-NompC::GFP/nompC[3];nompC-GAL4	NOMPC:GFP	-3735.74	0.07061
w*;nompC[3],UAS-NompC::GFP/nompC[3];nompC-GAL4	NOMPC:GFP	-3711.71	0.0705
w*;nompC[3],UAS-NompC::GFP/nompC[3];nompC-GAL4	NOMPC:GFP	-3687.69	0.07038
w*;nompC[3],UAS-NompC::GFP/nompC[3];nompC-GAL4	NOMPC:GFP	-3663.66	0.07026
w*;nompC[3],UAS-NompC::GFP/nompC[3];nompC-GAL4	NOMPC:GFP	-3639.64	0.07014
w*;nompC[3],UAS-NompC::GFP/nompC[3];nompC-GAL4	NOMPC:GFP	-3615.62	0.07002
w*;nompC[3],UAS-NompC::GFP/nompC[3];nompC-GAL4	NOMPC:GFP	-3591.59	0.0699
w*;nompC[3],UAS-NompC::GFP/nompC[3];nompC-GAL4	NOMPC:GFP	-3567.57	0.06978
w*;nompC[3],UAS-NompC::GFP/nompC[3];nompC-GAL4	NOMPC:GFP	-3554.63	0.06971
w*;nompC[3],UAS-NompC::GFP/nompC[3];nompC-GAL4	NOMPC:GFP	-3543.54	0.06965
w*;nompC[3],UAS-NompC::GFP/nompC[3];nompC-GAL4	NOMPC:GFP	-3541.72	0.06964
w*;nompC[3],UAS-NompC::GFP/nompC[3];nompC-GAL4	NOMPC:GFP	-3519.52	0.06952
w*;nompC[3],UAS-NompC::GFP/nompC[3];nompC-GAL4	NOMPC:GFP	-3495.5	0.0694
w*;nompC[3],UAS-NompC::GFP/nompC[3];nompC-GAL4	NOMPC:GFP	-3471.47	0.06927
w*;nompC[3],UAS-NompC::GFP/nompC[3];nompC-GAL4	NOMPC:GFP	-3447.45	0.06913
w*;nompC[3],UAS-NompC::GFP/nompC[3];nompC-GAL4	NOMPC:GFP	-3423.42	0.069
w*;nompC[3],UAS-NompC::GFP/nompC[3];nompC-GAL4	NOMPC:GFP	-3399.4	0.06886
w*;nompC[3],UAS-NompC::GFP/nompC[3];nompC-GAL4	NOMPC:GFP	-3375.38	0.06873
w*;nompC[3],UAS-NompC::GFP/nompC[3];nompC-GAL4	NOMPC:GFP	-3351.35	0.06859
w*;nompC[3],UAS-NompC::GFP/nompC[3];nompC-GAL4	NOMPC:GFP	-3339.78	0.06852
w*;nompC[3],UAS-NompC::GFP/nompC[3];nompC-GAL4	NOMPC:GFP	-3327.33	0.06845
w*;nompC[3],UAS-NompC::GFP/nompC[3];nompC-GAL4	NOMPC:GFP	-3303.3	0.06831
w*;nompC[3],UAS-NompC::GFP/nompC[3];nompC-GAL4	NOMPC:GFP	-3279.28	0.06816
w*;nompC[3],UAS-NompC::GFP/nompC[3];nompC-GAL4	NOMPC:GFP	-3255.26	0.06802
w*;nompC[3],UAS-NompC::GFP/nompC[3];nompC-GAL4	NOMPC:GFP	-3231.23	0.06787
w*;nompC[3],UAS-NompC::GFP/nompC[3];nompC-GAL4	NOMPC:GFP	-3207.21	0.06772
w*;nompC[3],UAS-NompC::GFP/nompC[3];nompC-GAL4	NOMPC:GFP	-3202.76	0.0677
w*;nompC[3],UAS-NompC::GFP/nompC[3];nompC-GAL4	NOMPC:GFP	-3183.18	0.06757
w*;nompC[3],UAS-NompC::GFP/nompC[3];nompC-GAL4	NOMPC:GFP	-3159.16	0.06742
w*;nompC[3],UAS-NompC::GFP/nompC[3];nompC-GAL4	NOMPC:GFP	-3135.14	0.06727
w*;nompC[3],UAS-NompC::GFP/nompC[3];nompC-GAL4	NOMPC:GFP	-3111.11	0.06712
w*;nompC[3],UAS-NompC::GFP/nompC[3];nompC-GAL4	NOMPC:GFP	-3087.09	0.06696
w*;nompC[3],UAS-NompC::GFP/nompC[3];nompC-GAL4	NOMPC:GFP	-3063.06	0.0668
w*;nompC[3],UAS-NompC::GFP/nompC[3];nompC-GAL4	NOMPC:GFP	-3039.04	0.06664
w*;nompC[3],UAS-NompC::GFP/nompC[3];nompC-GAL4	NOMPC:GFP	-3015.02	0.06648
w*;nompC[3],UAS-NompC::GFP/nompC[3];nompC-GAL4	NOMPC:GFP	-2990.99	0.06632
w*;nompC[3],UAS-NompC::GFP/nompC[3];nompC-GAL4	NOMPC:GFP	-2966.97	0.06615
w*;nompC[3],UAS-NompC::GFP/nompC[3];nompC-GAL4	NOMPC:GFP	-2959.78	0.0661
w*;nompC[3],UAS-NompC::GFP/nompC[3];nompC-GAL4	NOMPC:GFP	-2942.94	0.06598
w*;nompC[3],UAS-NompC::GFP/nompC[3];nompC-GAL4	NOMPC:GFP	-2918.92	0.06582
w*;nompC[3],UAS-NompC::GFP/nompC[3];nompC-GAL4	NOMPC:GFP	-2894.89	0.06565
w*;nompC[3],UAS-NompC::GFP/nompC[3];nompC-GAL4	NOMPC:GFP	-2870.87	0.06548
w*;nompC[3],UAS-NompC::GFP/nompC[3];nompC-GAL4	NOMPC:GFP	-2846.85	0.0653
w*;nompC[3],UAS-NompC::GFP/nompC[3];nompC-GAL4	NOMPC:GFP	-2822.82	0.06513
w*;nompC[3],UAS-NompC::GFP/nompC[3];nompC-GAL4	NOMPC:GFP	-2812.83	0.06505
w*;nompC[3],UAS-NompC::GFP/nompC[3];nompC-GAL4	NOMPC:GFP	-2798.8	0.06495
w*;nompC[3],UAS-NompC::GFP/nompC[3];nompC-GAL4	NOMPC:GFP	-2789.93	0.06489
w*;nompC[3],UAS-NompC::GFP/nompC[3];nompC-GAL4	NOMPC:GFP	-2774.77	0.06477
w*;nompC[3],UAS-NompC::GFP/nompC[3];nompC-GAL4	NOMPC:GFP	-2750.75	0.06459
w*;nompC[3],UAS-NompC::GFP/nompC[3];nompC-GAL4	NOMPC:GFP	-2726.73	0.06441
w*;nompC[3],UAS-NompC::GFP/nompC[3];nompC-GAL4	NOMPC:GFP	-2702.7	0.06423
w*;nompC[3],UAS-NompC::GFP/nompC[3];nompC-GAL4	NOMPC:GFP	-2678.68	0.06405
w*;nompC[3],UAS-NompC::GFP/nompC[3];nompC-GAL4	NOMPC:GFP	-2654.65	0.06386
w*;nompC[3],UAS-NompC::GFP/nompC[3];nompC-GAL4	NOMPC:GFP	-2630.63	0.06367
w*;nompC[3],UAS-NompC::GFP/nompC[3];nompC-GAL4	NOMPC:GFP	-2616.01	0.06356
w*;nompC[3],UAS-NompC::GFP/nompC[3];nompC-GAL4	NOMPC:GFP	-2606.61	0.06349
w*;nompC[3],UAS-NompC::GFP/nompC[3];nompC-GAL4	NOMPC:GFP	-2582.58	0.0633
w*;nompC[3],UAS-NompC::GFP/nompC[3];nompC-GAL4	NOMPC:GFP	-2558.56	0.06311
w*;nompC[3],UAS-NompC::GFP/nompC[3];nompC-GAL4	NOMPC:GFP	-2534.53	0.06291
w*;nompC[3],UAS-NompC::GFP/nompC[3];nompC-GAL4	NOMPC:GFP	-2514.97	0.06275
w*;nompC[3],UAS-NompC::GFP/nompC[3];nompC-GAL4	NOMPC:GFP	-2510.51	0.06272
w*;nompC[3],UAS-NompC::GFP/nompC[3];nompC-GAL4	NOMPC:GFP	-2503.91	0.06266
w*;nompC[3],UAS-NompC::GFP/nompC[3];nompC-GAL4	NOMPC:GFP	-2486.49	0.06252
w*;nompC[3],UAS-NompC::GFP/nompC[3];nompC-GAL4	NOMPC:GFP	-2462.46	0.06233
w*;nompC[3],UAS-NompC::GFP/nompC[3];nompC-GAL4	NOMPC:GFP	-2438.44	0.06213
w*;nompC[3],UAS-NompC::GFP/nompC[3];nompC-GAL4	NOMPC:GFP	-2414.41	0.06193
w*;nompC[3],UAS-NompC::GFP/nompC[3];nompC-GAL4	NOMPC:GFP	-2390.39	0.06173
w*;nompC[3],UAS-NompC::GFP/nompC[3];nompC-GAL4	NOMPC:GFP	-2382.29	0.06166
w*;nompC[3],UAS-NompC::GFP/nompC[3];nompC-GAL4	NOMPC:GFP	-2376.45	0.06161
w*;nompC[3],UAS-NompC::GFP/nompC[3];nompC-GAL4	NOMPC:GFP	-2366.37	0.06153
w*;nompC[3],UAS-NompC::GFP/nompC[3];nompC-GAL4	NOMPC:GFP	-2342.34	0.06132
w*;nompC[3],UAS-NompC::GFP/nompC[3];nompC-GAL4	NOMPC:GFP	-2318.32	0.06112
w*;nompC[3],UAS-NompC::GFP/nompC[3];nompC-GAL4	NOMPC:GFP	-2294.29	0.06091
w*;nompC[3],UAS-NompC::GFP/nompC[3];nompC-GAL4	NOMPC:GFP	-2270.27	0.06071
w*;nompC[3],UAS-NompC::GFP/nompC[3];nompC-GAL4	NOMPC:GFP	-2246.25	0.0605
w*;nompC[3],UAS-NompC::GFP/nompC[3];nompC-GAL4	NOMPC:GFP	-2222.22	0.06029
w*;nompC[3],UAS-NompC::GFP/nompC[3];nompC-GAL4	NOMPC:GFP	-2219.49	0.06027
w*;nompC[3],UAS-NompC::GFP/nompC[3];nompC-GAL4	NOMPC:GFP	-2198.2	0.06008
w*;nompC[3],UAS-NompC::GFP/nompC[3];nompC-GAL4	NOMPC:GFP	-2174.17	0.05987
w*;nompC[3],UAS-NompC::GFP/nompC[3];nompC-GAL4	NOMPC:GFP	-2150.15	0.05966
w*;nompC[3],UAS-NompC::GFP/nompC[3];nompC-GAL4	NOMPC:GFP	-2131.56	0.0595
w*;nompC[3],UAS-NompC::GFP/nompC[3];nompC-GAL4	NOMPC:GFP	-2126.13	0.05945
w*;nompC[3],UAS-NompC::GFP/nompC[3];nompC-GAL4	NOMPC:GFP	-2102.1	0.05923
w*;nompC[3],UAS-NompC::GFP/nompC[3];nompC-GAL4	NOMPC:GFP	-2078.08	0.05902
w*;nompC[3],UAS-NompC::GFP/nompC[3];nompC-GAL4	NOMPC:GFP	-2054.05	0.05881
w*;nompC[3],UAS-NompC::GFP/nompC[3];nompC-GAL4	NOMPC:GFP	-2030.03	0.05859
w*;nompC[3],UAS-NompC::GFP/nompC[3];nompC-GAL4	NOMPC:GFP	-2024.3	0.05854
w*;nompC[3],UAS-NompC::GFP/nompC[3];nompC-GAL4	NOMPC:GFP	-2006.01	0.05838
w*;nompC[3],UAS-NompC::GFP/nompC[3];nompC-GAL4	NOMPC:GFP	-1981.98	0.05816
w*;nompC[3],UAS-NompC::GFP/nompC[3];nompC-GAL4	NOMPC:GFP	-1957.96	0.05794
w*;nompC[3],UAS-NompC::GFP/nompC[3];nompC-GAL4	NOMPC:GFP	-1935.52	0.05774
w*;nompC[3],UAS-NompC::GFP/nompC[3];nompC-GAL4	NOMPC:GFP	-1933.93	0.05773
w*;nompC[3],UAS-NompC::GFP/nompC[3];nompC-GAL4	NOMPC:GFP	-1921.38	0.05761
w*;nompC[3],UAS-NompC::GFP/nompC[3];nompC-GAL4	NOMPC:GFP	-1909.91	0.05751
w*;nompC[3],UAS-NompC::GFP/nompC[3];nompC-GAL4	NOMPC:GFP	-1885.89	0.05729
w*;nompC[3],UAS-NompC::GFP/nompC[3];nompC-GAL4	NOMPC:GFP	-1861.86	0.05707
w*;nompC[3],UAS-NompC::GFP/nompC[3];nompC-GAL4	NOMPC:GFP	-1837.84	0.05685
w*;nompC[3],UAS-NompC::GFP/nompC[3];nompC-GAL4	NOMPC:GFP	-1813.81	0.05664
w*;nompC[3],UAS-NompC::GFP/nompC[3];nompC-GAL4	NOMPC:GFP	-1799.59	0.05651
w*;nompC[3],UAS-NompC::GFP/nompC[3];nompC-GAL4	NOMPC:GFP	-1789.79	0.05642
w*;nompC[3],UAS-NompC::GFP/nompC[3];nompC-GAL4	NOMPC:GFP	-1765.77	0.0562
w*;nompC[3],UAS-NompC::GFP/nompC[3];nompC-GAL4	NOMPC:GFP	-1741.74	0.05598
w*;nompC[3],UAS-NompC::GFP/nompC[3];nompC-GAL4	NOMPC:GFP	-1740.39	0.05597
w*;nompC[3],UAS-NompC::GFP/nompC[3];nompC-GAL4	NOMPC:GFP	-1717.72	0.05576
w*;nompC[3],UAS-NompC::GFP/nompC[3];nompC-GAL4	NOMPC:GFP	-1693.69	0.05554
w*;nompC[3],UAS-NompC::GFP/nompC[3];nompC-GAL4	NOMPC:GFP	-1669.67	0.05533
w*;nompC[3],UAS-NompC::GFP/nompC[3];nompC-GAL4	NOMPC:GFP	-1645.65	0.05511
w*;nompC[3],UAS-NompC::GFP/nompC[3];nompC-GAL4	NOMPC:GFP	-1621.62	0.05489
w*;nompC[3],UAS-NompC::GFP/nompC[3];nompC-GAL4	NOMPC:GFP	-1597.6	0.05467
w*;nompC[3],UAS-NompC::GFP/nompC[3];nompC-GAL4	NOMPC:GFP	-1573.57	0.05446
w*;nompC[3],UAS-NompC::GFP/nompC[3];nompC-GAL4	NOMPC:GFP	-1549.55	0.05424
w*;nompC[3],UAS-NompC::GFP/nompC[3];nompC-GAL4	NOMPC:GFP	-1525.53	0.05402
w*;nompC[3],UAS-NompC::GFP/nompC[3];nompC-GAL4	NOMPC:GFP	-1501.5	0.05381
w*;nompC[3],UAS-NompC::GFP/nompC[3];nompC-GAL4	NOMPC:GFP	-1497.51	0.05377
w*;nompC[3],UAS-NompC::GFP/nompC[3];nompC-GAL4	NOMPC:GFP	-1477.48	0.05359
w*;nompC[3],UAS-NompC::GFP/nompC[3];nompC-GAL4	NOMPC:GFP	-1453.45	0.05338
w*;nompC[3],UAS-NompC::GFP/nompC[3];nompC-GAL4	NOMPC:GFP	-1445.48	0.05331
w*;nompC[3],UAS-NompC::GFP/nompC[3];nompC-GAL4	NOMPC:GFP	-1429.43	0.05317
w*;nompC[3],UAS-NompC::GFP/nompC[3];nompC-GAL4	NOMPC:GFP	-1420.98	0.05309
w*;nompC[3],UAS-NompC::GFP/nompC[3];nompC-GAL4	NOMPC:GFP	-1405.41	0.05295
w*;nompC[3],UAS-NompC::GFP/nompC[3];nompC-GAL4	NOMPC:GFP	-1381.38	0.05274
w*;nompC[3],UAS-NompC::GFP/nompC[3];nompC-GAL4	NOMPC:GFP	-1357.36	0.05253
w*;nompC[3],UAS-NompC::GFP/nompC[3];nompC-GAL4	NOMPC:GFP	-1342.44	0.0524
w*;nompC[3],UAS-NompC::GFP/nompC[3];nompC-GAL4	NOMPC:GFP	-1333.33	0.05232
w*;nompC[3],UAS-NompC::GFP/nompC[3];nompC-GAL4	NOMPC:GFP	-1318.38	0.05219
w*;nompC[3],UAS-NompC::GFP/nompC[3];nompC-GAL4	NOMPC:GFP	-1309.31	0.05211
w*;nompC[3],UAS-NompC::GFP/nompC[3];nompC-GAL4	NOMPC:GFP	-1285.29	0.0519
w*;nompC[3],UAS-NompC::GFP/nompC[3];nompC-GAL4	NOMPC:GFP	-1261.26	0.05169
w*;nompC[3],UAS-NompC::GFP/nompC[3];nompC-GAL4	NOMPC:GFP	-1237.24	0.05148
w*;nompC[3],UAS-NompC::GFP/nompC[3];nompC-GAL4	NOMPC:GFP	-1213.21	0.05128
w*;nompC[3],UAS-NompC::GFP/nompC[3];nompC-GAL4	NOMPC:GFP	-1189.19	0.05107
w*;nompC[3],UAS-NompC::GFP/nompC[3];nompC-GAL4	NOMPC:GFP	-1165.17	0.05086
w*;nompC[3],UAS-NompC::GFP/nompC[3];nompC-GAL4	NOMPC:GFP	-1141.14	0.05065
w*;nompC[3],UAS-NompC::GFP/nompC[3];nompC-GAL4	NOMPC:GFP	-1117.12	0.05045
w*;nompC[3],UAS-NompC::GFP/nompC[3];nompC-GAL4	NOMPC:GFP	-1093.09	0.05024
w*;nompC[3],UAS-NompC::GFP/nompC[3];nompC-GAL4	NOMPC:GFP	-1069.07	0.05003
w*;nompC[3],UAS-NompC::GFP/nompC[3];nompC-GAL4	NOMPC:GFP	-1045.05	0.04982
w*;nompC[3],UAS-NompC::GFP/nompC[3];nompC-GAL4	NOMPC:GFP	-1021.02	0.04961
w*;nompC[3],UAS-NompC::GFP/nompC[3];nompC-GAL4	NOMPC:GFP	-996.997	0.04939
w*;nompC[3],UAS-NompC::GFP/nompC[3];nompC-GAL4	NOMPC:GFP	-972.973	0.04918
w*;nompC[3],UAS-NompC::GFP/nompC[3];nompC-GAL4	NOMPC:GFP	-948.949	0.04896
w*;nompC[3],UAS-NompC::GFP/nompC[3];nompC-GAL4	NOMPC:GFP	-924.925	0.04873
w*;nompC[3],UAS-NompC::GFP/nompC[3];nompC-GAL4	NOMPC:GFP	-900.901	0.0485
w*;nompC[3],UAS-NompC::GFP/nompC[3];nompC-GAL4	NOMPC:GFP	-891.066	0.04841
w*;nompC[3],UAS-NompC::GFP/nompC[3];nompC-GAL4	NOMPC:GFP	-876.877	0.04827
w*;nompC[3],UAS-NompC::GFP/nompC[3];nompC-GAL4	NOMPC:GFP	-870.889	0.04821
w*;nompC[3],UAS-NompC::GFP/nompC[3];nompC-GAL4	NOMPC:GFP	-855.003	0.04805
w*;nompC[3],UAS-NompC::GFP/nompC[3];nompC-GAL4	NOMPC:GFP	-852.853	0.04802
w*;nompC[3],UAS-NompC::GFP/nompC[3];nompC-GAL4	NOMPC:GFP	-833.854	0.04783
w*;nompC[3],UAS-NompC::GFP/nompC[3];nompC-GAL4	NOMPC:GFP	-830.979	0.0478
w*;nompC[3],UAS-NompC::GFP/nompC[3];nompC-GAL4	NOMPC:GFP	-828.829	0.04777
w*;nompC[3],UAS-NompC::GFP/nompC[3];nompC-GAL4	NOMPC:GFP	-804.805	0.04751
w*;nompC[3],UAS-NompC::GFP/nompC[3];nompC-GAL4	NOMPC:GFP	-780.781	0.04724
w*;nompC[3],UAS-NompC::GFP/nompC[3];nompC-GAL4	NOMPC:GFP	-756.757	0.04695
w*;nompC[3],UAS-NompC::GFP/nompC[3];nompC-GAL4	NOMPC:GFP	-732.733	0.04665
w*;nompC[3],UAS-NompC::GFP/nompC[3];nompC-GAL4	NOMPC:GFP	-708.709	0.04633
w*;nompC[3],UAS-NompC::GFP/nompC[3];nompC-GAL4	NOMPC:GFP	-684.685	0.04599
w*;nompC[3],UAS-NompC::GFP/nompC[3];nompC-GAL4	NOMPC:GFP	-660.661	0.04562
w*;nompC[3],UAS-NompC::GFP/nompC[3];nompC-GAL4	NOMPC:GFP	-636.637	0.04523
w*;nompC[3],UAS-NompC::GFP/nompC[3];nompC-GAL4	NOMPC:GFP	-612.613	0.04481
w*;nompC[3],UAS-NompC::GFP/nompC[3];nompC-GAL4	NOMPC:GFP	-588.589	0.04435
w*;nompC[3],UAS-NompC::GFP/nompC[3];nompC-GAL4	NOMPC:GFP	-564.565	0.04386
w*;nompC[3],UAS-NompC::GFP/nompC[3];nompC-GAL4	NOMPC:GFP	-540.541	0.04332
w*;nompC[3],UAS-NompC::GFP/nompC[3];nompC-GAL4	NOMPC:GFP	-516.517	0.04274
w*;nompC[3],UAS-NompC::GFP/nompC[3];nompC-GAL4	NOMPC:GFP	-492.492	0.04212
w*;nompC[3],UAS-NompC::GFP/nompC[3];nompC-GAL4	NOMPC:GFP	-468.468	0.04144
w*;nompC[3],UAS-NompC::GFP/nompC[3];nompC-GAL4	NOMPC:GFP	-448.563	0.04083
w*;nompC[3],UAS-NompC::GFP/nompC[3];nompC-GAL4	NOMPC:GFP	-448.016	0.04081
w*;nompC[3],UAS-NompC::GFP/nompC[3];nompC-GAL4	NOMPC:GFP	-444.444	0.0407
w*;nompC[3],UAS-NompC::GFP/nompC[3];nompC-GAL4	NOMPC:GFP	-428.055	0.04017
w*;nompC[3],UAS-NompC::GFP/nompC[3];nompC-GAL4	NOMPC:GFP	-427.039	0.04013
w*;nompC[3],UAS-NompC::GFP/nompC[3];nompC-GAL4	NOMPC:GFP	-420.42	0.03991
w*;nompC[3],UAS-NompC::GFP/nompC[3];nompC-GAL4	NOMPC:GFP	-410.367	0.03956
w*;nompC[3],UAS-NompC::GFP/nompC[3];nompC-GAL4	NOMPC:GFP	-396.396	0.03906
w*;nompC[3],UAS-NompC::GFP/nompC[3];nompC-GAL4	NOMPC:GFP	-372.372	0.03815
w*;nompC[3],UAS-NompC::GFP/nompC[3];nompC-GAL4	NOMPC:GFP	-348.348	0.03718
w*;nompC[3],UAS-NompC::GFP/nompC[3];nompC-GAL4	NOMPC:GFP	-324.324	0.03617
w*;nompC[3],UAS-NompC::GFP/nompC[3];nompC-GAL4	NOMPC:GFP	-300.3	0.0351
w*;nompC[3],UAS-NompC::GFP/nompC[3];nompC-GAL4	NOMPC:GFP	-276.276	0.034
w*;nompC[3],UAS-NompC::GFP/nompC[3];nompC-GAL4	NOMPC:GFP	-262.94	0.03338
w*;nompC[3],UAS-NompC::GFP/nompC[3];nompC-GAL4	NOMPC:GFP	-255.768	0.03304
w*;nompC[3],UAS-NompC::GFP/nompC[3];nompC-GAL4	NOMPC:GFP	-252.252	0.03287
w*;nompC[3],UAS-NompC::GFP/nompC[3];nompC-GAL4	NOMPC:GFP	-228.228	0.03174
w*;nompC[3],UAS-NompC::GFP/nompC[3];nompC-GAL4	NOMPC:GFP	-211.824	0.03097
w*;nompC[3],UAS-NompC::GFP/nompC[3];nompC-GAL4	NOMPC:GFP	-205.855	0.03069
w*;nompC[3],UAS-NompC::GFP/nompC[3];nompC-GAL4	NOMPC:GFP	-204.204	0.03062
w*;nompC[3],UAS-NompC::GFP/nompC[3];nompC-GAL4	NOMPC:GFP	-196.786	0.03028
w*;nompC[3],UAS-NompC::GFP/nompC[3];nompC-GAL4	NOMPC:GFP	-180.18	0.02953
w*;nompC[3],UAS-NompC::GFP/nompC[3];nompC-GAL4	NOMPC:GFP	-156.156	0.02849
w*;nompC[3],UAS-NompC::GFP/nompC[3];nompC-GAL4	NOMPC:GFP	-149.392	0.02822
w*;nompC[3],UAS-NompC::GFP/nompC[3];nompC-GAL4	NOMPC:GFP	-137.838	0.02776
w*;nompC[3],UAS-NompC::GFP/nompC[3];nompC-GAL4	NOMPC:GFP	-132.132	0.02754
w*;nompC[3],UAS-NompC::GFP/nompC[3];nompC-GAL4	NOMPC:GFP	-108.108	0.0267
w*;nompC[3],UAS-NompC::GFP/nompC[3];nompC-GAL4	NOMPC:GFP	-84.0841	0.02599
w*;nompC[3],UAS-NompC::GFP/nompC[3];nompC-GAL4	NOMPC:GFP	-81.0026	0.02591
w*;nompC[3],UAS-NompC::GFP/nompC[3];nompC-GAL4	NOMPC:GFP	-78.5499	0.02585
w*;nompC[3],UAS-NompC::GFP/nompC[3];nompC-GAL4	NOMPC:GFP	-76.1218	0.02579
w*;nompC[3],UAS-NompC::GFP/nompC[3];nompC-GAL4	NOMPC:GFP	-73.6274	0.02573
w*;nompC[3],UAS-NompC::GFP/nompC[3];nompC-GAL4	NOMPC:GFP	-70.165	0.02565
w*;nompC[3],UAS-NompC::GFP/nompC[3];nompC-GAL4	NOMPC:GFP	-60.0601	0.02543
w*;nompC[3],UAS-NompC::GFP/nompC[3];nompC-GAL4	NOMPC:GFP	-36.036	0.02505
w*;nompC[3],UAS-NompC::GFP/nompC[3];nompC-GAL4	NOMPC:GFP	-14.1471	0.02487
w*;nompC[3],UAS-NompC::GFP/nompC[3];nompC-GAL4	NOMPC:GFP	-12.012	0.02486
w*;nompC[3],UAS-NompC::GFP/nompC[3];nompC-GAL4	NOMPC:GFP	-11.6567	0.02486
w*;nompC[3],UAS-NompC::GFP/nompC[3];nompC-GAL4	NOMPC:GFP	-10.5776	0.02485
w*;nompC[3],UAS-NompC::GFP/nompC[3];nompC-GAL4	NOMPC:GFP	1.57025	0.02483
w*;nompC[3],UAS-NompC::GFP/nompC[3];nompC-GAL4	NOMPC:GFP	1.67175	0.02483
w*;nompC[3],UAS-NompC::GFP/nompC[3];nompC-GAL4	NOMPC:GFP	12.012	0.02486
w*;nompC[3],UAS-NompC::GFP/nompC[3];nompC-GAL4	NOMPC:GFP	36.036	0.02505
w*;nompC[3],UAS-NompC::GFP/nompC[3];nompC-GAL4	NOMPC:GFP	50.5364	0.02526
w*;nompC[3],UAS-NompC::GFP/nompC[3];nompC-GAL4	NOMPC:GFP	58.3123	0.0254
w*;nompC[3],UAS-NompC::GFP/nompC[3];nompC-GAL4	NOMPC:GFP	60.0015	0.02543
w*;nompC[3],UAS-NompC::GFP/nompC[3];nompC-GAL4	NOMPC:GFP	60.0601	0.02543
w*;nompC[3],UAS-NompC::GFP/nompC[3];nompC-GAL4	NOMPC:GFP	73.578	0.02572
w*;nompC[3],UAS-NompC::GFP/nompC[3];nompC-GAL4	NOMPC:GFP	80.0062	0.02588
w*;nompC[3],UAS-NompC::GFP/nompC[3];nompC-GAL4	NOMPC:GFP	84.0841	0.02599
w*;nompC[3],UAS-NompC::GFP/nompC[3];nompC-GAL4	NOMPC:GFP	108.108	0.0267
w*;nompC[3],UAS-NompC::GFP/nompC[3];nompC-GAL4	NOMPC:GFP	125.454	0.02729
w*;nompC[3],UAS-NompC::GFP/nompC[3];nompC-GAL4	NOMPC:GFP	129.783	0.02745
w*;nompC[3],UAS-NompC::GFP/nompC[3];nompC-GAL4	NOMPC:GFP	132.132	0.02754
w*;nompC[3],UAS-NompC::GFP/nompC[3];nompC-GAL4	NOMPC:GFP	135.594	0.02767
w*;nompC[3],UAS-NompC::GFP/nompC[3];nompC-GAL4	NOMPC:GFP	140.161	0.02785
w*;nompC[3],UAS-NompC::GFP/nompC[3];nompC-GAL4	NOMPC:GFP	148.167	0.02817
w*;nompC[3],UAS-NompC::GFP/nompC[3];nompC-GAL4	NOMPC:GFP	156.156	0.02849
w*;nompC[3],UAS-NompC::GFP/nompC[3];nompC-GAL4	NOMPC:GFP	180.18	0.02953
w*;nompC[3],UAS-NompC::GFP/nompC[3];nompC-GAL4	NOMPC:GFP	195.99	0.03024
w*;nompC[3],UAS-NompC::GFP/nompC[3];nompC-GAL4	NOMPC:GFP	201.724	0.0305
w*;nompC[3],UAS-NompC::GFP/nompC[3];nompC-GAL4	NOMPC:GFP	204.204	0.03062
w*;nompC[3],UAS-NompC::GFP/nompC[3];nompC-GAL4	NOMPC:GFP	211.034	0.03093
w*;nompC[3],UAS-NompC::GFP/nompC[3];nompC-GAL4	NOMPC:GFP	228.228	0.03174
w*;nompC[3],UAS-NompC::GFP/nompC[3];nompC-GAL4	NOMPC:GFP	252.252	0.03287
w*;nompC[3],UAS-NompC::GFP/nompC[3];nompC-GAL4	NOMPC:GFP	257.493	0.03312
w*;nompC[3],UAS-NompC::GFP/nompC[3];nompC-GAL4	NOMPC:GFP	263.492	0.0334
w*;nompC[3],UAS-NompC::GFP/nompC[3];nompC-GAL4	NOMPC:GFP	276.276	0.034
w*;nompC[3],UAS-NompC::GFP/nompC[3];nompC-GAL4	NOMPC:GFP	300.3	0.0351
w*;nompC[3],UAS-NompC::GFP/nompC[3];nompC-GAL4	NOMPC:GFP	320.922	0.03602
w*;nompC[3],UAS-NompC::GFP/nompC[3];nompC-GAL4	NOMPC:GFP	324.324	0.03617
w*;nompC[3],UAS-NompC::GFP/nompC[3];nompC-GAL4	NOMPC:GFP	328.807	0.03636
w*;nompC[3],UAS-NompC::GFP/nompC[3];nompC-GAL4	NOMPC:GFP	338.044	0.03675
w*;nompC[3],UAS-NompC::GFP/nompC[3];nompC-GAL4	NOMPC:GFP	348.348	0.03718
w*;nompC[3],UAS-NompC::GFP/nompC[3];nompC-GAL4	NOMPC:GFP	372.372	0.03815
w*;nompC[3],UAS-NompC::GFP/nompC[3];nompC-GAL4	NOMPC:GFP	396.396	0.03906
w*;nompC[3],UAS-NompC::GFP/nompC[3];nompC-GAL4	NOMPC:GFP	420.42	0.03991
w*;nompC[3],UAS-NompC::GFP/nompC[3];nompC-GAL4	NOMPC:GFP	444.444	0.0407
w*;nompC[3],UAS-NompC::GFP/nompC[3];nompC-GAL4	NOMPC:GFP	449.318	0.04086
w*;nompC[3],UAS-NompC::GFP/nompC[3];nompC-GAL4	NOMPC:GFP	449.389	0.04086
w*;nompC[3],UAS-NompC::GFP/nompC[3];nompC-GAL4	NOMPC:GFP	468.468	0.04144
w*;nompC[3],UAS-NompC::GFP/nompC[3];nompC-GAL4	NOMPC:GFP	492.492	0.04212
w*;nompC[3],UAS-NompC::GFP/nompC[3];nompC-GAL4	NOMPC:GFP	516.517	0.04274
w*;nompC[3],UAS-NompC::GFP/nompC[3];nompC-GAL4	NOMPC:GFP	524.417	0.04294
w*;nompC[3],UAS-NompC::GFP/nompC[3];nompC-GAL4	NOMPC:GFP	540.541	0.04332
w*;nompC[3],UAS-NompC::GFP/nompC[3];nompC-GAL4	NOMPC:GFP	541.164	0.04334
w*;nompC[3],UAS-NompC::GFP/nompC[3];nompC-GAL4	NOMPC:GFP	543.03	0.04338
w*;nompC[3],UAS-NompC::GFP/nompC[3];nompC-GAL4	NOMPC:GFP	564.565	0.04386
w*;nompC[3],UAS-NompC::GFP/nompC[3];nompC-GAL4	NOMPC:GFP	588.589	0.04435
w*;nompC[3],UAS-NompC::GFP/nompC[3];nompC-GAL4	NOMPC:GFP	612.613	0.04481
w*;nompC[3],UAS-NompC::GFP/nompC[3];nompC-GAL4	NOMPC:GFP	636.637	0.04523
w*;nompC[3],UAS-NompC::GFP/nompC[3];nompC-GAL4	NOMPC:GFP	660.661	0.04562
w*;nompC[3],UAS-NompC::GFP/nompC[3];nompC-GAL4	NOMPC:GFP	684.685	0.04599
w*;nompC[3],UAS-NompC::GFP/nompC[3];nompC-GAL4	NOMPC:GFP	708.709	0.04633
w*;nompC[3],UAS-NompC::GFP/nompC[3];nompC-GAL4	NOMPC:GFP	732.733	0.04665
w*;nompC[3],UAS-NompC::GFP/nompC[3];nompC-GAL4	NOMPC:GFP	756.757	0.04695
w*;nompC[3],UAS-NompC::GFP/nompC[3];nompC-GAL4	NOMPC:GFP	780.781	0.04724
w*;nompC[3],UAS-NompC::GFP/nompC[3];nompC-GAL4	NOMPC:GFP	804.805	0.04751
w*;nompC[3],UAS-NompC::GFP/nompC[3];nompC-GAL4	NOMPC:GFP	828.829	0.04777
w*;nompC[3],UAS-NompC::GFP/nompC[3];nompC-GAL4	NOMPC:GFP	836.553	0.04786
w*;nompC[3],UAS-NompC::GFP/nompC[3];nompC-GAL4	NOMPC:GFP	847.232	0.04797
w*;nompC[3],UAS-NompC::GFP/nompC[3];nompC-GAL4	NOMPC:GFP	852.853	0.04802
w*;nompC[3],UAS-NompC::GFP/nompC[3];nompC-GAL4	NOMPC:GFP	876.877	0.04827
w*;nompC[3],UAS-NompC::GFP/nompC[3];nompC-GAL4	NOMPC:GFP	900.901	0.0485
w*;nompC[3],UAS-NompC::GFP/nompC[3];nompC-GAL4	NOMPC:GFP	924.925	0.04873
w*;nompC[3],UAS-NompC::GFP/nompC[3];nompC-GAL4	NOMPC:GFP	934.25	0.04882
w*;nompC[3],UAS-NompC::GFP/nompC[3];nompC-GAL4	NOMPC:GFP	948.949	0.04896
w*;nompC[3],UAS-NompC::GFP/nompC[3];nompC-GAL4	NOMPC:GFP	970.964	0.04916
w*;nompC[3],UAS-NompC::GFP/nompC[3];nompC-GAL4	NOMPC:GFP	972.973	0.04918
w*;nompC[3],UAS-NompC::GFP/nompC[3];nompC-GAL4	NOMPC:GFP	982.157	0.04926
w*;nompC[3],UAS-NompC::GFP/nompC[3];nompC-GAL4	NOMPC:GFP	996.997	0.04939
w*;nompC[3],UAS-NompC::GFP/nompC[3];nompC-GAL4	NOMPC:GFP	1021.02	0.04961
w*;nompC[3],UAS-NompC::GFP/nompC[3];nompC-GAL4	NOMPC:GFP	1045.05	0.04982
w*;nompC[3],UAS-NompC::GFP/nompC[3];nompC-GAL4	NOMPC:GFP	1069.07	0.05003
w*;nompC[3],UAS-NompC::GFP/nompC[3];nompC-GAL4	NOMPC:GFP	1093.09	0.05024
w*;nompC[3],UAS-NompC::GFP/nompC[3];nompC-GAL4	NOMPC:GFP	1117.12	0.05045
w*;nompC[3],UAS-NompC::GFP/nompC[3];nompC-GAL4	NOMPC:GFP	1141.14	0.05065
w*;nompC[3],UAS-NompC::GFP/nompC[3];nompC-GAL4	NOMPC:GFP	1165.17	0.05086
w*;nompC[3],UAS-NompC::GFP/nompC[3];nompC-GAL4	NOMPC:GFP	1189.19	0.05107
w*;nompC[3],UAS-NompC::GFP/nompC[3];nompC-GAL4	NOMPC:GFP	1213.21	0.05128
w*;nompC[3],UAS-NompC::GFP/nompC[3];nompC-GAL4	NOMPC:GFP	1237.24	0.05148
w*;nompC[3],UAS-NompC::GFP/nompC[3];nompC-GAL4	NOMPC:GFP	1261.26	0.05169
w*;nompC[3],UAS-NompC::GFP/nompC[3];nompC-GAL4	NOMPC:GFP	1285.29	0.0519
w*;nompC[3],UAS-NompC::GFP/nompC[3];nompC-GAL4	NOMPC:GFP	1309.31	0.05211
w*;nompC[3],UAS-NompC::GFP/nompC[3];nompC-GAL4	NOMPC:GFP	1333.33	0.05232
w*;nompC[3],UAS-NompC::GFP/nompC[3];nompC-GAL4	NOMPC:GFP	1345.78	0.05243
w*;nompC[3],UAS-NompC::GFP/nompC[3];nompC-GAL4	NOMPC:GFP	1357.36	0.05253
w*;nompC[3],UAS-NompC::GFP/nompC[3];nompC-GAL4	NOMPC:GFP	1369.8	0.05264
w*;nompC[3],UAS-NompC::GFP/nompC[3];nompC-GAL4	NOMPC:GFP	1381.38	0.05274
w*;nompC[3],UAS-NompC::GFP/nompC[3];nompC-GAL4	NOMPC:GFP	1405.41	0.05295
w*;nompC[3],UAS-NompC::GFP/nompC[3];nompC-GAL4	NOMPC:GFP	1429.43	0.05317
w*;nompC[3],UAS-NompC::GFP/nompC[3];nompC-GAL4	NOMPC:GFP	1453.45	0.05338
w*;nompC[3],UAS-NompC::GFP/nompC[3];nompC-GAL4	NOMPC:GFP	1468.9	0.05352
w*;nompC[3],UAS-NompC::GFP/nompC[3];nompC-GAL4	NOMPC:GFP	1477.48	0.05359
w*;nompC[3],UAS-NompC::GFP/nompC[3];nompC-GAL4	NOMPC:GFP	1501.5	0.05381
w*;nompC[3],UAS-NompC::GFP/nompC[3];nompC-GAL4	NOMPC:GFP	1525.53	0.05402
w*;nompC[3],UAS-NompC::GFP/nompC[3];nompC-GAL4	NOMPC:GFP	1536.6	0.05412
w*;nompC[3],UAS-NompC::GFP/nompC[3];nompC-GAL4	NOMPC:GFP	1549.55	0.05424
w*;nompC[3],UAS-NompC::GFP/nompC[3];nompC-GAL4	NOMPC:GFP	1565.82	0.05439
w*;nompC[3],UAS-NompC::GFP/nompC[3];nompC-GAL4	NOMPC:GFP	1573.57	0.05446
w*;nompC[3],UAS-NompC::GFP/nompC[3];nompC-GAL4	NOMPC:GFP	1597.6	0.05467
w*;nompC[3],UAS-NompC::GFP/nompC[3];nompC-GAL4	NOMPC:GFP	1621.62	0.05489
w*;nompC[3],UAS-NompC::GFP/nompC[3];nompC-GAL4	NOMPC:GFP	1645.65	0.05511
w*;nompC[3],UAS-NompC::GFP/nompC[3];nompC-GAL4	NOMPC:GFP	1669.67	0.05533
w*;nompC[3],UAS-NompC::GFP/nompC[3];nompC-GAL4	NOMPC:GFP	1693.69	0.05554
w*;nompC[3],UAS-NompC::GFP/nompC[3];nompC-GAL4	NOMPC:GFP	1717.72	0.05576
w*;nompC[3],UAS-NompC::GFP/nompC[3];nompC-GAL4	NOMPC:GFP	1741.74	0.05598
w*;nompC[3],UAS-NompC::GFP/nompC[3];nompC-GAL4	NOMPC:GFP	1765.77	0.0562
w*;nompC[3],UAS-NompC::GFP/nompC[3];nompC-GAL4	NOMPC:GFP	1789.79	0.05642
w*;nompC[3],UAS-NompC::GFP/nompC[3];nompC-GAL4	NOMPC:GFP	1801.62	0.05653
w*;nompC[3],UAS-NompC::GFP/nompC[3];nompC-GAL4	NOMPC:GFP	1813.81	0.05664
w*;nompC[3],UAS-NompC::GFP/nompC[3];nompC-GAL4	NOMPC:GFP	1832.62	0.05681
w*;nompC[3],UAS-NompC::GFP/nompC[3];nompC-GAL4	NOMPC:GFP	1837.84	0.05685
w*;nompC[3],UAS-NompC::GFP/nompC[3];nompC-GAL4	NOMPC:GFP	1861.86	0.05707
w*;nompC[3],UAS-NompC::GFP/nompC[3];nompC-GAL4	NOMPC:GFP	1885.89	0.05729
w*;nompC[3],UAS-NompC::GFP/nompC[3];nompC-GAL4	NOMPC:GFP	1909.91	0.05751
w*;nompC[3],UAS-NompC::GFP/nompC[3];nompC-GAL4	NOMPC:GFP	1933.93	0.05773
w*;nompC[3],UAS-NompC::GFP/nompC[3];nompC-GAL4	NOMPC:GFP	1957.96	0.05794
w*;nompC[3],UAS-NompC::GFP/nompC[3];nompC-GAL4	NOMPC:GFP	1977.52	0.05812
w*;nompC[3],UAS-NompC::GFP/nompC[3];nompC-GAL4	NOMPC:GFP	1981.98	0.05816
w*;nompC[3],UAS-NompC::GFP/nompC[3];nompC-GAL4	NOMPC:GFP	2006.01	0.05838
w*;nompC[3],UAS-NompC::GFP/nompC[3];nompC-GAL4	NOMPC:GFP	2030.03	0.05859
w*;nompC[3],UAS-NompC::GFP/nompC[3];nompC-GAL4	NOMPC:GFP	2039.58	0.05868
w*;nompC[3],UAS-NompC::GFP/nompC[3];nompC-GAL4	NOMPC:GFP	2054.05	0.05881
w*;nompC[3],UAS-NompC::GFP/nompC[3];nompC-GAL4	NOMPC:GFP	2078.08	0.05902
w*;nompC[3],UAS-NompC::GFP/nompC[3];nompC-GAL4	NOMPC:GFP	2093.64	0.05916
w*;nompC[3],UAS-NompC::GFP/nompC[3];nompC-GAL4	NOMPC:GFP	2102.1	0.05923
w*;nompC[3],UAS-NompC::GFP/nompC[3];nompC-GAL4	NOMPC:GFP	2126.13	0.05945
w*;nompC[3],UAS-NompC::GFP/nompC[3];nompC-GAL4	NOMPC:GFP	2150.15	0.05966
w*;nompC[3],UAS-NompC::GFP/nompC[3];nompC-GAL4	NOMPC:GFP	2174.17	0.05987
w*;nompC[3],UAS-NompC::GFP/nompC[3];nompC-GAL4	NOMPC:GFP	2198.2	0.06008
w*;nompC[3],UAS-NompC::GFP/nompC[3];nompC-GAL4	NOMPC:GFP	2222.22	0.06029
w*;nompC[3],UAS-NompC::GFP/nompC[3];nompC-GAL4	NOMPC:GFP	2230.91	0.06037
w*;nompC[3],UAS-NompC::GFP/nompC[3];nompC-GAL4	NOMPC:GFP	2246.25	0.0605
w*;nompC[3],UAS-NompC::GFP/nompC[3];nompC-GAL4	NOMPC:GFP	2250.38	0.06054
w*;nompC[3],UAS-NompC::GFP/nompC[3];nompC-GAL4	NOMPC:GFP	2270.27	0.06071
w*;nompC[3],UAS-NompC::GFP/nompC[3];nompC-GAL4	NOMPC:GFP	2294.29	0.06091
w*;nompC[3],UAS-NompC::GFP/nompC[3];nompC-GAL4	NOMPC:GFP	2318.32	0.06112
w*;nompC[3],UAS-NompC::GFP/nompC[3];nompC-GAL4	NOMPC:GFP	2342.34	0.06132
w*;nompC[3],UAS-NompC::GFP/nompC[3];nompC-GAL4	NOMPC:GFP	2366.37	0.06153
w*;nompC[3],UAS-NompC::GFP/nompC[3];nompC-GAL4	NOMPC:GFP	2390.39	0.06173
w*;nompC[3],UAS-NompC::GFP/nompC[3];nompC-GAL4	NOMPC:GFP	2414.41	0.06193
w*;nompC[3],UAS-NompC::GFP/nompC[3];nompC-GAL4	NOMPC:GFP	2438.44	0.06213
w*;nompC[3],UAS-NompC::GFP/nompC[3];nompC-GAL4	NOMPC:GFP	2462.46	0.06233
w*;nompC[3],UAS-NompC::GFP/nompC[3];nompC-GAL4	NOMPC:GFP	2474.17	0.06242
w*;nompC[3],UAS-NompC::GFP/nompC[3];nompC-GAL4	NOMPC:GFP	2486.49	0.06252
w*;nompC[3],UAS-NompC::GFP/nompC[3];nompC-GAL4	NOMPC:GFP	2510.51	0.06272
w*;nompC[3],UAS-NompC::GFP/nompC[3];nompC-GAL4	NOMPC:GFP	2512.05	0.06273
w*;nompC[3],UAS-NompC::GFP/nompC[3];nompC-GAL4	NOMPC:GFP	2534.53	0.06291
w*;nompC[3],UAS-NompC::GFP/nompC[3];nompC-GAL4	NOMPC:GFP	2558.56	0.06311
w*;nompC[3],UAS-NompC::GFP/nompC[3];nompC-GAL4	NOMPC:GFP	2582.58	0.0633
w*;nompC[3],UAS-NompC::GFP/nompC[3];nompC-GAL4	NOMPC:GFP	2588.19	0.06334
w*;nompC[3],UAS-NompC::GFP/nompC[3];nompC-GAL4	NOMPC:GFP	2606.61	0.06349
w*;nompC[3],UAS-NompC::GFP/nompC[3];nompC-GAL4	NOMPC:GFP	2630.63	0.06367
w*;nompC[3],UAS-NompC::GFP/nompC[3];nompC-GAL4	NOMPC:GFP	2637.25	0.06373
w*;nompC[3],UAS-NompC::GFP/nompC[3];nompC-GAL4	NOMPC:GFP	2650.33	0.06383
w*;nompC[3],UAS-NompC::GFP/nompC[3];nompC-GAL4	NOMPC:GFP	2654.65	0.06386
w*;nompC[3],UAS-NompC::GFP/nompC[3];nompC-GAL4	NOMPC:GFP	2678.68	0.06405
w*;nompC[3],UAS-NompC::GFP/nompC[3];nompC-GAL4	NOMPC:GFP	2702.7	0.06423
w*;nompC[3],UAS-NompC::GFP/nompC[3];nompC-GAL4	NOMPC:GFP	2726.73	0.06441
w*;nompC[3],UAS-NompC::GFP/nompC[3];nompC-GAL4	NOMPC:GFP	2750.75	0.06459
w*;nompC[3],UAS-NompC::GFP/nompC[3];nompC-GAL4	NOMPC:GFP	2774.77	0.06477
w*;nompC[3],UAS-NompC::GFP/nompC[3];nompC-GAL4	NOMPC:GFP	2798.8	0.06495
w*;nompC[3],UAS-NompC::GFP/nompC[3];nompC-GAL4	NOMPC:GFP	2822.82	0.06513
w*;nompC[3],UAS-NompC::GFP/nompC[3];nompC-GAL4	NOMPC:GFP	2846.85	0.0653
w*;nompC[3],UAS-NompC::GFP/nompC[3];nompC-GAL4	NOMPC:GFP	2870.87	0.06548
w*;nompC[3],UAS-NompC::GFP/nompC[3];nompC-GAL4	NOMPC:GFP	2894.89	0.06565
w*;nompC[3],UAS-NompC::GFP/nompC[3];nompC-GAL4	NOMPC:GFP	2906.28	0.06573
w*;nompC[3],UAS-NompC::GFP/nompC[3];nompC-GAL4	NOMPC:GFP	2918.92	0.06582
w*;nompC[3],UAS-NompC::GFP/nompC[3];nompC-GAL4	NOMPC:GFP	2942.94	0.06598
w*;nompC[3],UAS-NompC::GFP/nompC[3];nompC-GAL4	NOMPC:GFP	2966.97	0.06615
w*;nompC[3],UAS-NompC::GFP/nompC[3];nompC-GAL4	NOMPC:GFP	2969.14	0.06617
w*;nompC[3],UAS-NompC::GFP/nompC[3];nompC-GAL4	NOMPC:GFP	2990.99	0.06632
w*;nompC[3],UAS-NompC::GFP/nompC[3];nompC-GAL4	NOMPC:GFP	3015.02	0.06648
w*;nompC[3],UAS-NompC::GFP/nompC[3];nompC-GAL4	NOMPC:GFP	3039.04	0.06664
w*;nompC[3],UAS-NompC::GFP/nompC[3];nompC-GAL4	NOMPC:GFP	3049.3	0.06671
w*;nompC[3],UAS-NompC::GFP/nompC[3];nompC-GAL4	NOMPC:GFP	3063.06	0.0668
w*;nompC[3],UAS-NompC::GFP/nompC[3];nompC-GAL4	NOMPC:GFP	3087.09	0.06696
w*;nompC[3],UAS-NompC::GFP/nompC[3];nompC-GAL4	NOMPC:GFP	3111.11	0.06712
w*;nompC[3],UAS-NompC::GFP/nompC[3];nompC-GAL4	NOMPC:GFP	3135.14	0.06727
w*;nompC[3],UAS-NompC::GFP/nompC[3];nompC-GAL4	NOMPC:GFP	3159.16	0.06742
w*;nompC[3],UAS-NompC::GFP/nompC[3];nompC-GAL4	NOMPC:GFP	3183.18	0.06757
w*;nompC[3],UAS-NompC::GFP/nompC[3];nompC-GAL4	NOMPC:GFP	3207.21	0.06772
w*;nompC[3],UAS-NompC::GFP/nompC[3];nompC-GAL4	NOMPC:GFP	3231.23	0.06787
w*;nompC[3],UAS-NompC::GFP/nompC[3];nompC-GAL4	NOMPC:GFP	3255.26	0.06802
w*;nompC[3],UAS-NompC::GFP/nompC[3];nompC-GAL4	NOMPC:GFP	3279.28	0.06816
w*;nompC[3],UAS-NompC::GFP/nompC[3];nompC-GAL4	NOMPC:GFP	3303.3	0.06831
w*;nompC[3],UAS-NompC::GFP/nompC[3];nompC-GAL4	NOMPC:GFP	3327.33	0.06845
w*;nompC[3],UAS-NompC::GFP/nompC[3];nompC-GAL4	NOMPC:GFP	3351.35	0.06859
w*;nompC[3],UAS-NompC::GFP/nompC[3];nompC-GAL4	NOMPC:GFP	3375.38	0.06873
w*;nompC[3],UAS-NompC::GFP/nompC[3];nompC-GAL4	NOMPC:GFP	3380.4	0.06876
w*;nompC[3],UAS-NompC::GFP/nompC[3];nompC-GAL4	NOMPC:GFP	3381.72	0.06876
w*;nompC[3],UAS-NompC::GFP/nompC[3];nompC-GAL4	NOMPC:GFP	3399.4	0.06886
w*;nompC[3],UAS-NompC::GFP/nompC[3];nompC-GAL4	NOMPC:GFP	3423.42	0.069
w*;nompC[3],UAS-NompC::GFP/nompC[3];nompC-GAL4	NOMPC:GFP	3447.45	0.06913
w*;nompC[3],UAS-NompC::GFP/nompC[3];nompC-GAL4	NOMPC:GFP	3471.47	0.06927
w*;nompC[3],UAS-NompC::GFP/nompC[3];nompC-GAL4	NOMPC:GFP	3495.5	0.0694
w*;nompC[3],UAS-NompC::GFP/nompC[3];nompC-GAL4	NOMPC:GFP	3519.52	0.06952
w*;nompC[3],UAS-NompC::GFP/nompC[3];nompC-GAL4	NOMPC:GFP	3543.54	0.06965
w*;nompC[3],UAS-NompC::GFP/nompC[3];nompC-GAL4	NOMPC:GFP	3567.57	0.06978
w*;nompC[3],UAS-NompC::GFP/nompC[3];nompC-GAL4	NOMPC:GFP	3591.59	0.0699
w*;nompC[3],UAS-NompC::GFP/nompC[3];nompC-GAL4	NOMPC:GFP	3615.62	0.07002
w*;nompC[3],UAS-NompC::GFP/nompC[3];nompC-GAL4	NOMPC:GFP	3639.64	0.07014
w*;nompC[3],UAS-NompC::GFP/nompC[3];nompC-GAL4	NOMPC:GFP	3663.66	0.07026
w*;nompC[3],UAS-NompC::GFP/nompC[3];nompC-GAL4	NOMPC:GFP	3685.83	0.07037
w*;nompC[3],UAS-NompC::GFP/nompC[3];nompC-GAL4	NOMPC:GFP	3687.69	0.07038
w*;nompC[3],UAS-NompC::GFP/nompC[3];nompC-GAL4	NOMPC:GFP	3711.71	0.0705
w*;nompC[3],UAS-NompC::GFP/nompC[3];nompC-GAL4	NOMPC:GFP	3735.74	0.07061
w*;nompC[3],UAS-NompC::GFP/nompC[3];nompC-GAL4	NOMPC:GFP	3759.76	0.07073
w*;nompC[3],UAS-NompC::GFP/nompC[3];nompC-GAL4	NOMPC:GFP	3773.95	0.07079
w*;nompC[3],UAS-NompC::GFP/nompC[3];nompC-GAL4	NOMPC:GFP	3783.78	0.07084
w*;nompC[3],UAS-NompC::GFP/nompC[3];nompC-GAL4	NOMPC:GFP	3807.81	0.07095
w*;nompC[3],UAS-NompC::GFP/nompC[3];nompC-GAL4	NOMPC:GFP	3831.83	0.07106
w*;nompC[3],UAS-NompC::GFP/nompC[3];nompC-GAL4	NOMPC:GFP	3855.86	0.07116
w*;nompC[3],UAS-NompC::GFP/nompC[3];nompC-GAL4	NOMPC:GFP	3879.88	0.07127
w*;nompC[3],UAS-NompC::GFP/nompC[3];nompC-GAL4	NOMPC:GFP	3895.12	0.07134
w*;nompC[3],UAS-NompC::GFP/nompC[3];nompC-GAL4	NOMPC:GFP	3903.9	0.07137
w*;nompC[3],UAS-NompC::GFP/nompC[3];nompC-GAL4	NOMPC:GFP	3927.93	0.07148
w*;nompC[3],UAS-NompC::GFP/nompC[3];nompC-GAL4	NOMPC:GFP	3951.95	0.07158
w*;nompC[3],UAS-NompC::GFP/nompC[3];nompC-GAL4	NOMPC:GFP	3975.98	0.07168
w*;nompC[3],UAS-NompC::GFP/nompC[3];nompC-GAL4	NOMPC:GFP	4000	0.07178
w*;nompC[3],UAS-NompC::GFP/nompC[3];nompC-GAL4	NOMPC:GFP	4024.02	0.07188
w*;nompC[3],UAS-NompC::GFP/nompC[3];nompC-GAL4	NOMPC:GFP	4048.05	0.07197
w*;nompC[3],UAS-NompC::GFP/nompC[3];nompC-GAL4	NOMPC:GFP	4072.07	0.07207
w*;nompC[3],UAS-NompC::GFP/nompC[3];nompC-GAL4	NOMPC:GFP	4096.1	0.07216
w*;nompC[3],UAS-NompC::GFP/nompC[3];nompC-GAL4	NOMPC:GFP	4120.12	0.07225
w*;nompC[3],UAS-NompC::GFP/nompC[3];nompC-GAL4	NOMPC:GFP	4144.14	0.07234
w*;nompC[3],UAS-NompC::GFP/nompC[3];nompC-GAL4	NOMPC:GFP	4168.17	0.07243
w*;nompC[3],UAS-NompC::GFP/nompC[3];nompC-GAL4	NOMPC:GFP	4192.19	0.07252
w*;nompC[3],UAS-NompC::GFP/nompC[3];nompC-GAL4	NOMPC:GFP	4216.22	0.07261
w*;nompC[3],UAS-NompC::GFP/nompC[3];nompC-GAL4	NOMPC:GFP	4240.24	0.07269
w*;nompC[3],UAS-NompC::GFP/nompC[3];nompC-GAL4	NOMPC:GFP	4264.26	0.07278
w*;nompC[3],UAS-NompC::GFP/nompC[3];nompC-GAL4	NOMPC:GFP	4288.29	0.07286
w*;nompC[3],UAS-NompC::GFP/nompC[3];nompC-GAL4	NOMPC:GFP	4312.31	0.07294
w*;nompC[3],UAS-NompC::GFP/nompC[3];nompC-GAL4	NOMPC:GFP	4336.34	0.07303
w*;nompC[3],UAS-NompC::GFP/nompC[3];nompC-GAL4	NOMPC:GFP	4360.36	0.07311
w*;nompC[3],UAS-NompC::GFP/nompC[3];nompC-GAL4	NOMPC:GFP	4384.38	0.07318
w*;nompC[3],UAS-NompC::GFP/nompC[3];nompC-GAL4	NOMPC:GFP	4408.41	0.07326
w*;nompC[3],UAS-NompC::GFP/nompC[3];nompC-GAL4	NOMPC:GFP	4432.43	0.07334
w*;nompC[3],UAS-NompC::GFP/nompC[3];nompC-GAL4	NOMPC:GFP	4456.46	0.07341
w*;nompC[3],UAS-NompC::GFP/nompC[3];nompC-GAL4	NOMPC:GFP	4480.48	0.07349
w*;nompC[3],UAS-NompC::GFP/nompC[3];nompC-GAL4	NOMPC:GFP	4504.5	0.07356
w*;nompC[3],UAS-NompC::GFP/nompC[3];nompC-GAL4	NOMPC:GFP	4528.53	0.07363
w*;nompC[3],UAS-NompC::GFP/nompC[3];nompC-GAL4	NOMPC:GFP	4552.55	0.0737
w*;nompC[3],UAS-NompC::GFP/nompC[3];nompC-GAL4	NOMPC:GFP	4576.58	0.07377
w*;nompC[3],UAS-NompC::GFP/nompC[3];nompC-GAL4	NOMPC:GFP	4600.6	0.07384
w*;nompC[3],UAS-NompC::GFP/nompC[3];nompC-GAL4	NOMPC:GFP	4624.62	0.07391
w*;nompC[3],UAS-NompC::GFP/nompC[3];nompC-GAL4	NOMPC:GFP	4648.65	0.07398
w*;nompC[3],UAS-NompC::GFP/nompC[3];nompC-GAL4	NOMPC:GFP	4672.67	0.07404
w*;nompC[3],UAS-NompC::GFP/nompC[3];nompC-GAL4	NOMPC:GFP	4696.7	0.07411
w*;nompC[3],UAS-NompC::GFP/nompC[3];nompC-GAL4	NOMPC:GFP	4720.72	0.07417
w*;nompC[3],UAS-NompC::GFP/nompC[3];nompC-GAL4	NOMPC:GFP	4744.74	0.07423
w*;nompC[3],UAS-NompC::GFP/nompC[3];nompC-GAL4	NOMPC:GFP	4768.77	0.07429
w*;nompC[3],UAS-NompC::GFP/nompC[3];nompC-GAL4	NOMPC:GFP	4792.79	0.07436
w*;nompC[3],UAS-NompC::GFP/nompC[3];nompC-GAL4	NOMPC:GFP	4816.82	0.07442
w*;nompC[3],UAS-NompC::GFP/nompC[3];nompC-GAL4	NOMPC:GFP	4840.84	0.07447
w*;nompC[3],UAS-NompC::GFP/nompC[3];nompC-GAL4	NOMPC:GFP	4864.86	0.07453
w*;nompC[3],UAS-NompC::GFP/nompC[3];nompC-GAL4	NOMPC:GFP	4888.89	0.07459
w*;nompC[3],UAS-NompC::GFP/nompC[3];nompC-GAL4	NOMPC:GFP	4912.91	0.07465
w*;nompC[3],UAS-NompC::GFP/nompC[3];nompC-GAL4	NOMPC:GFP	4936.94	0.0747
w*;nompC[3],UAS-NompC::GFP/nompC[3];nompC-GAL4	NOMPC:GFP	4960.96	0.07476
w*;nompC[3],UAS-NompC::GFP/nompC[3];nompC-GAL4	NOMPC:GFP	4984.98	0.07481
w*;nompC[3],UAS-NompC::GFP/nompC[3];nompC-GAL4	NOMPC:GFP	5009.01	0.07486
w*;nompC[3],UAS-NompC::GFP/nompC[3];nompC-GAL4	NOMPC:GFP	5033.03	0.07491
w*;nompC[3],UAS-NompC::GFP/nompC[3];nompC-GAL4	NOMPC:GFP	5057.06	0.07497
w*;nompC[3],UAS-NompC::GFP/nompC[3];nompC-GAL4	NOMPC:GFP	5081.08	0.07502
w*;nompC[3],UAS-NompC::GFP/nompC[3];nompC-GAL4	NOMPC:GFP	5105.11	0.07507
w*;nompC[3],UAS-NompC::GFP/nompC[3];nompC-GAL4	NOMPC:GFP	5129.13	0.07511
w*;nompC[3],UAS-NompC::GFP/nompC[3];nompC-GAL4	NOMPC:GFP	5153.15	0.07516
w*;nompC[3],UAS-NompC::GFP/nompC[3];nompC-GAL4	NOMPC:GFP	5177.18	0.07521
w*;nompC[3],UAS-NompC::GFP/nompC[3];nompC-GAL4	NOMPC:GFP	5201.2	0.07526
w*;nompC[3],UAS-NompC::GFP/nompC[3];nompC-GAL4	NOMPC:GFP	5225.23	0.0753
w*;nompC[3],UAS-NompC::GFP/nompC[3];nompC-GAL4	NOMPC:GFP	5249.25	0.07535
w*;nompC[3],UAS-NompC::GFP/nompC[3];nompC-GAL4	NOMPC:GFP	5273.27	0.07539
w*;nompC[3],UAS-NompC::GFP/nompC[3];nompC-GAL4	NOMPC:GFP	5297.3	0.07543
w*;nompC[3],UAS-NompC::GFP/nompC[3];nompC-GAL4	NOMPC:GFP	5321.32	0.07548
w*;nompC[3],UAS-NompC::GFP/nompC[3];nompC-GAL4	NOMPC:GFP	5345.35	0.07552
w*;nompC[3],UAS-NompC::GFP/nompC[3];nompC-GAL4	NOMPC:GFP	5360.39	0.07555
w*;nompC[3],UAS-NompC::GFP/nompC[3];nompC-GAL4	NOMPC:GFP	5369.37	0.07556
w*;nompC[3],UAS-NompC::GFP/nompC[3];nompC-GAL4	NOMPC:GFP	5393.39	0.0756
w*;nompC[3],UAS-NompC::GFP/nompC[3];nompC-GAL4	NOMPC:GFP	5417.42	0.07564
w*;nompC[3],UAS-NompC::GFP/nompC[3];nompC-GAL4	NOMPC:GFP	5441.44	0.07568
w*;nompC[3],UAS-NompC::GFP/nompC[3];nompC-GAL4	NOMPC:GFP	5465.47	0.07572
w*;nompC[3],UAS-NompC::GFP/nompC[3];nompC-GAL4	NOMPC:GFP	5471.65	0.07573
w*;nompC[3],UAS-NompC::GFP/nompC[3];nompC-GAL4	NOMPC:GFP	5489.49	0.07576
w*;nompC[3],UAS-NompC::GFP/nompC[3];nompC-GAL4	NOMPC:GFP	5513.51	0.0758
w*;nompC[3],UAS-NompC::GFP/nompC[3];nompC-GAL4	NOMPC:GFP	5537.54	0.07583
w*;nompC[3],UAS-NompC::GFP/nompC[3];nompC-GAL4	NOMPC:GFP	5561.56	0.07587
w*;nompC[3],UAS-NompC::GFP/nompC[3];nompC-GAL4	NOMPC:GFP	5585.59	0.07591
w*;nompC[3],UAS-NompC::GFP/nompC[3];nompC-GAL4	NOMPC:GFP	5609.61	0.07594
w*;nompC[3],UAS-NompC::GFP/nompC[3];nompC-GAL4	NOMPC:GFP	5633.63	0.07598
w*;nompC[3],UAS-NompC::GFP/nompC[3];nompC-GAL4	NOMPC:GFP	5657.66	0.07601
w*;nompC[3],UAS-NompC::GFP/nompC[3];nompC-GAL4	NOMPC:GFP	5681.68	0.07604
w*;nompC[3],UAS-NompC::GFP/nompC[3];nompC-GAL4	NOMPC:GFP	5705.71	0.07608
w*;nompC[3],UAS-NompC::GFP/nompC[3];nompC-GAL4	NOMPC:GFP	5729.73	0.07611
w*;nompC[3],UAS-NompC::GFP/nompC[3];nompC-GAL4	NOMPC:GFP	5753.75	0.07614
w*;nompC[3],UAS-NompC::GFP/nompC[3];nompC-GAL4	NOMPC:GFP	5777.78	0.07617
w*;nompC[3],UAS-NompC::GFP/nompC[3];nompC-GAL4	NOMPC:GFP	5801.8	0.0762
w*;nompC[3],UAS-NompC::GFP/nompC[3];nompC-GAL4	NOMPC:GFP	5825.83	0.07623
w*;nompC[3],UAS-NompC::GFP/nompC[3];nompC-GAL4	NOMPC:GFP	5849.85	0.07626
w*;nompC[3],UAS-NompC::GFP/nompC[3];nompC-GAL4	NOMPC:GFP	5873.87	0.07629
w*;nompC[3],UAS-NompC::GFP/nompC[3];nompC-GAL4	NOMPC:GFP	5897.1	0.07632
w*;nompC[3],UAS-NompC::GFP/nompC[3];nompC-GAL4	NOMPC:GFP	5897.9	0.07632
w*;nompC[3],UAS-NompC::GFP/nompC[3];nompC-GAL4	NOMPC:GFP	5921.92	0.07635
w*;nompC[3],UAS-NompC::GFP/nompC[3];nompC-GAL4	NOMPC:GFP	5945.95	0.07638
w*;nompC[3],UAS-NompC::GFP/nompC[3];nompC-GAL4	NOMPC:GFP	5957.17	0.07639
w*;nompC[3],UAS-NompC::GFP/nompC[3];nompC-GAL4	NOMPC:GFP	5969.97	0.07641
w*;nompC[3],UAS-NompC::GFP/nompC[3];nompC-GAL4	NOMPC:GFP	5993.99	0.07643
w*;nompC[3],UAS-NompC::GFP/nompC[3];nompC-GAL4	NOMPC:GFP	6018.02	0.07646
w*;nompC[3],UAS-NompC::GFP/nompC[3];nompC-GAL4	NOMPC:GFP	6042.04	0.07649
w*;nompC[3],UAS-NompC::GFP/nompC[3];nompC-GAL4	NOMPC:GFP	6066.07	0.07651
w*;nompC[3],UAS-NompC::GFP/nompC[3];nompC-GAL4	NOMPC:GFP	6090.09	0.07654
w*;nompC[3],UAS-NompC::GFP/nompC[3];nompC-GAL4	NOMPC:GFP	6114.11	0.07656
w*;nompC[3],UAS-NompC::GFP/nompC[3];nompC-GAL4	NOMPC:GFP	6138.14	0.07659
w*;nompC[3],UAS-NompC::GFP/nompC[3];nompC-GAL4	NOMPC:GFP	6162.16	0.07661
w*;nompC[3],UAS-NompC::GFP/nompC[3];nompC-GAL4	NOMPC:GFP	6186.19	0.07663
w*;nompC[3],UAS-NompC::GFP/nompC[3];nompC-GAL4	NOMPC:GFP	6210.21	0.07666
w*;nompC[3],UAS-NompC::GFP/nompC[3];nompC-GAL4	NOMPC:GFP	6234.23	0.07668
w*;nompC[3],UAS-NompC::GFP/nompC[3];nompC-GAL4	NOMPC:GFP	6243.91	0.07669
w*;nompC[3],UAS-NompC::GFP/nompC[3];nompC-GAL4	NOMPC:GFP	6258.26	0.0767
w*;nompC[3],UAS-NompC::GFP/nompC[3];nompC-GAL4	NOMPC:GFP	6282.28	0.07673
w*;nompC[3],UAS-NompC::GFP/nompC[3];nompC-GAL4	NOMPC:GFP	6306.31	0.07675
w*;nompC[3],UAS-NompC::GFP/nompC[3];nompC-GAL4	NOMPC:GFP	6330.33	0.07677
w*;nompC[3],UAS-NompC::GFP/nompC[3];nompC-GAL4	NOMPC:GFP	6354.35	0.07679
w*;nompC[3],UAS-NompC::GFP/nompC[3];nompC-GAL4	NOMPC:GFP	6378.38	0.07681
w*;nompC[3],UAS-NompC::GFP/nompC[3];nompC-GAL4	NOMPC:GFP	6402.4	0.07683
w*;nompC[3],UAS-NompC::GFP/nompC[3];nompC-GAL4	NOMPC:GFP	6426.43	0.07685
w*;nompC[3],UAS-NompC::GFP/nompC[3];nompC-GAL4	NOMPC:GFP	6450.45	0.07687
w*;nompC[3],UAS-NompC::GFP/nompC[3];nompC-GAL4	NOMPC:GFP	6474.47	0.07689
w*;nompC[3],UAS-NompC::GFP/nompC[3];nompC-GAL4	NOMPC:GFP	6498.5	0.07691
w*;nompC[3],UAS-NompC::GFP/nompC[3];nompC-GAL4	NOMPC:GFP	6522.52	0.07693
w*;nompC[3],UAS-NompC::GFP/nompC[3];nompC-GAL4	NOMPC:GFP	6546.55	0.07695
w*;nompC[3],UAS-NompC::GFP/nompC[3];nompC-GAL4	NOMPC:GFP	6570.57	0.07696
w*;nompC[3],UAS-NompC::GFP/nompC[3];nompC-GAL4	NOMPC:GFP	6594.59	0.07698
w*;nompC[3],UAS-NompC::GFP/nompC[3];nompC-GAL4	NOMPC:GFP	6618.62	0.077
w*;nompC[3],UAS-NompC::GFP/nompC[3];nompC-GAL4	NOMPC:GFP	6642.64	0.07702
w*;nompC[3],UAS-NompC::GFP/nompC[3];nompC-GAL4	NOMPC:GFP	6666.67	0.07703
w*;nompC[3],UAS-NompC::GFP/nompC[3];nompC-GAL4	NOMPC:GFP	6690.69	0.07705
w*;nompC[3],UAS-NompC::GFP/nompC[3];nompC-GAL4	NOMPC:GFP	6714.71	0.07707
w*;nompC[3],UAS-NompC::GFP/nompC[3];nompC-GAL4	NOMPC:GFP	6738.74	0.07708
w*;nompC[3],UAS-NompC::GFP/nompC[3];nompC-GAL4	NOMPC:GFP	6762.76	0.0771
w*;nompC[3],UAS-NompC::GFP/nompC[3];nompC-GAL4	NOMPC:GFP	6786.79	0.07711
w*;nompC[3],UAS-NompC::GFP/nompC[3];nompC-GAL4	NOMPC:GFP	6810.81	0.07713
w*;nompC[3],UAS-NompC::GFP/nompC[3];nompC-GAL4	NOMPC:GFP	6834.83	0.07714
w*;nompC[3],UAS-NompC::GFP/nompC[3];nompC-GAL4	NOMPC:GFP	6858.86	0.07716
w*;nompC[3],UAS-NompC::GFP/nompC[3];nompC-GAL4	NOMPC:GFP	6882.88	0.07717
w*;nompC[3],UAS-NompC::GFP/nompC[3];nompC-GAL4	NOMPC:GFP	6906.91	0.07719
w*;nompC[3],UAS-NompC::GFP/nompC[3];nompC-GAL4	NOMPC:GFP	6930.93	0.0772
w*;nompC[3],UAS-NompC::GFP/nompC[3];nompC-GAL4	NOMPC:GFP	6954.95	0.07721
w*;nompC[3],UAS-NompC::GFP/nompC[3];nompC-GAL4	NOMPC:GFP	6978.98	0.07723
w*;nompC[3],UAS-NompC::GFP/nompC[3];nompC-GAL4	NOMPC:GFP	7003	0.07724
w*;nompC[3],UAS-NompC::GFP/nompC[3];nompC-GAL4	NOMPC:GFP	7027.03	0.07725
w*;nompC[3],UAS-NompC::GFP/nompC[3];nompC-GAL4	NOMPC:GFP	7051.05	0.07727
w*;nompC[3],UAS-NompC::GFP/nompC[3];nompC-GAL4	NOMPC:GFP	7075.08	0.07728
w*;nompC[3],UAS-NompC::GFP/nompC[3];nompC-GAL4	NOMPC:GFP	7099.1	0.07729
w*;nompC[3],UAS-NompC::GFP/nompC[3];nompC-GAL4	NOMPC:GFP	7123.12	0.0773
w*;nompC[3],UAS-NompC::GFP/nompC[3];nompC-GAL4	NOMPC:GFP	7147.15	0.07732
w*;nompC[3],UAS-NompC::GFP/nompC[3];nompC-GAL4	NOMPC:GFP	7171.17	0.07733
w*;nompC[3],UAS-NompC::GFP/nompC[3];nompC-GAL4	NOMPC:GFP	7195.2	0.07734
w*;nompC[3],UAS-NompC::GFP/nompC[3];nompC-GAL4	NOMPC:GFP	7219.22	0.07735
w*;nompC[3],UAS-NompC::GFP/nompC[3];nompC-GAL4	NOMPC:GFP	7243.24	0.07736
w*;nompC[3],UAS-NompC::GFP/nompC[3];nompC-GAL4	NOMPC:GFP	7267.27	0.07737
w*;nompC[3],UAS-NompC::GFP/nompC[3];nompC-GAL4	NOMPC:GFP	7291.29	0.07738
w*;nompC[3],UAS-NompC::GFP/nompC[3];nompC-GAL4	NOMPC:GFP	7315.32	0.0774
w*;nompC[3],UAS-NompC::GFP/nompC[3];nompC-GAL4	NOMPC:GFP	7339.34	0.07741
w*;nompC[3],UAS-NompC::GFP/nompC[3];nompC-GAL4	NOMPC:GFP	7363.36	0.07742
w*;nompC[3],UAS-NompC::GFP/nompC[3];nompC-GAL4	NOMPC:GFP	7387.39	0.07743
w*;nompC[3],UAS-NompC::GFP/nompC[3];nompC-GAL4	NOMPC:GFP	7411.41	0.07744
w*;nompC[3],UAS-NompC::GFP/nompC[3];nompC-GAL4	NOMPC:GFP	7435.44	0.07745
w*;nompC[3],UAS-NompC::GFP/nompC[3];nompC-GAL4	NOMPC:GFP	7459.46	0.07746
w*;nompC[3],UAS-NompC::GFP/nompC[3];nompC-GAL4	NOMPC:GFP	7483.48	0.07746
w*;nompC[3],UAS-NompC::GFP/nompC[3];nompC-GAL4	NOMPC:GFP	7507.51	0.07747
w*;nompC[3],UAS-NompC::GFP/nompC[3];nompC-GAL4	NOMPC:GFP	7531.53	0.07748
w*;nompC[3],UAS-NompC::GFP/nompC[3];nompC-GAL4	NOMPC:GFP	7555.56	0.07749
w*;nompC[3],UAS-NompC::GFP/nompC[3];nompC-GAL4	NOMPC:GFP	7579.58	0.0775
w*;nompC[3],UAS-NompC::GFP/nompC[3];nompC-GAL4	NOMPC:GFP	7603.6	0.07751
w*;nompC[3],UAS-NompC::GFP/nompC[3];nompC-GAL4	NOMPC:GFP	7627.63	0.07752
w*;nompC[3],UAS-NompC::GFP/nompC[3];nompC-GAL4	NOMPC:GFP	7651.65	0.07753
w*;nompC[3],UAS-NompC::GFP/nompC[3];nompC-GAL4	NOMPC:GFP	7675.68	0.07753
w*;nompC[3],UAS-NompC::GFP/nompC[3];nompC-GAL4	NOMPC:GFP	7699.7	0.07754
w*;nompC[3],UAS-NompC::GFP/nompC[3];nompC-GAL4	NOMPC:GFP	7723.72	0.07755
w*;nompC[3],UAS-NompC::GFP/nompC[3];nompC-GAL4	NOMPC:GFP	7740.35	0.07756
w*;nompC[3],UAS-NompC::GFP/nompC[3];nompC-GAL4	NOMPC:GFP	7747.75	0.07756
w*;nompC[3],UAS-NompC::GFP/nompC[3];nompC-GAL4	NOMPC:GFP	7771.77	0.07757
w*;nompC[3],UAS-NompC::GFP/nompC[3];nompC-GAL4	NOMPC:GFP	7795.8	0.07757
w*;nompC[3],UAS-NompC::GFP/nompC[3];nompC-GAL4	NOMPC:GFP	7819.82	0.07758
w*;nompC[3],UAS-NompC::GFP/nompC[3];nompC-GAL4	NOMPC:GFP	7843.84	0.07759
w*;nompC[3],UAS-NompC::GFP/nompC[3];nompC-GAL4	NOMPC:GFP	7867.87	0.0776
w*;nompC[3],UAS-NompC::GFP/nompC[3];nompC-GAL4	NOMPC:GFP	7891.89	0.0776
w*;nompC[3],UAS-NompC::GFP/nompC[3];nompC-GAL4	NOMPC:GFP	7915.92	0.07761
w*;nompC[3],UAS-NompC::GFP/nompC[3];nompC-GAL4	NOMPC:GFP	7939.94	0.07762
w*;nompC[3],UAS-NompC::GFP/nompC[3];nompC-GAL4	NOMPC:GFP	7963.96	0.07762
w*;nompC[3],UAS-NompC::GFP/nompC[3];nompC-GAL4	NOMPC:GFP	7987.99	0.07763
w*;nompC[3],UAS-NompC::GFP/nompC[3];nompC-GAL4	NOMPC:GFP	7995.69	0.07763
w*;nompC[3],UAS-NompC::GFP/nompC[3];nompC-GAL4	NOMPC:GFP	8012.01	0.07764
w*;nompC[3],UAS-NompC::GFP/nompC[3];nompC-GAL4	NOMPC:GFP	8036.04	0.07764
w*;nompC[3],UAS-NompC::GFP/nompC[3];nompC-GAL4	NOMPC:GFP	8060.06	0.07765
w*;nompC[3],UAS-NompC::GFP/nompC[3];nompC-GAL4	NOMPC:GFP	8084.08	0.07765
w*;nompC[3],UAS-NompC::GFP/nompC[3];nompC-GAL4	NOMPC:GFP	8108.11	0.07766
w*;nompC[3],UAS-NompC::GFP/nompC[3];nompC-GAL4	NOMPC:GFP	8132.13	0.07767
w*;nompC[3],UAS-NompC::GFP/nompC[3];nompC-GAL4	NOMPC:GFP	8156.16	0.07767
w*;nompC[3],UAS-NompC::GFP/nompC[3];nompC-GAL4	NOMPC:GFP	8180.18	0.07768
w*;nompC[3],UAS-NompC::GFP/nompC[3];nompC-GAL4	NOMPC:GFP	8204.2	0.07768
w*;nompC[3],UAS-NompC::GFP/nompC[3];nompC-GAL4	NOMPC:GFP	8228.23	0.07769
w*;nompC[3],UAS-NompC::GFP/nompC[3];nompC-GAL4	NOMPC:GFP	8252.25	0.07769
w*;nompC[3],UAS-NompC::GFP/nompC[3];nompC-GAL4	NOMPC:GFP	8276.28	0.0777
w*;nompC[3],UAS-NompC::GFP/nompC[3];nompC-GAL4	NOMPC:GFP	8300.3	0.0777
w*;nompC[3],UAS-NompC::GFP/nompC[3];nompC-GAL4	NOMPC:GFP	8324.32	0.07771
w*;nompC[3],UAS-NompC::GFP/nompC[3];nompC-GAL4	NOMPC:GFP	8348.35	0.07771
w*;nompC[3],UAS-NompC::GFP/nompC[3];nompC-GAL4	NOMPC:GFP	8372.37	0.07772
w*;nompC[3],UAS-NompC::GFP/nompC[3];nompC-GAL4	NOMPC:GFP	8396.4	0.07772
w*;nompC[3],UAS-NompC::GFP/nompC[3];nompC-GAL4	NOMPC:GFP	8420.42	0.07773
w*;nompC[3],UAS-NompC::GFP/nompC[3];nompC-GAL4	NOMPC:GFP	8444.44	0.07773
w*;nompC[3],UAS-NompC::GFP/nompC[3];nompC-GAL4	NOMPC:GFP	8468.47	0.07774
w*;nompC[3],UAS-NompC::GFP/nompC[3];nompC-GAL4	NOMPC:GFP	8492.49	0.07774
w*;nompC[3],UAS-NompC::GFP/nompC[3];nompC-GAL4	NOMPC:GFP	8516.52	0.07775
w*;nompC[3],UAS-NompC::GFP/nompC[3];nompC-GAL4	NOMPC:GFP	8540.54	0.07775
w*;nompC[3],UAS-NompC::GFP/nompC[3];nompC-GAL4	NOMPC:GFP	8552.16	0.07775
w*;nompC[3],UAS-NompC::GFP/nompC[3];nompC-GAL4	NOMPC:GFP	8564.56	0.07776
w*;nompC[3],UAS-NompC::GFP/nompC[3];nompC-GAL4	NOMPC:GFP	8588.59	0.07776
w*;nompC[3],UAS-NompC::GFP/nompC[3];nompC-GAL4	NOMPC:GFP	8612.61	0.07776
w*;nompC[3],UAS-NompC::GFP/nompC[3];nompC-GAL4	NOMPC:GFP	8636.64	0.07777
w*;nompC[3],UAS-NompC::GFP/nompC[3];nompC-GAL4	NOMPC:GFP	8660.66	0.07777
w*;nompC[3],UAS-NompC::GFP/nompC[3];nompC-GAL4	NOMPC:GFP	8684.68	0.07778
w*;nompC[3],UAS-NompC::GFP/nompC[3];nompC-GAL4	NOMPC:GFP	8708.71	0.07778
w*;nompC[3],UAS-NompC::GFP/nompC[3];nompC-GAL4	NOMPC:GFP	8732.73	0.07778
w*;nompC[3],UAS-NompC::GFP/nompC[3];nompC-GAL4	NOMPC:GFP	8756.76	0.07779
w*;nompC[3],UAS-NompC::GFP/nompC[3];nompC-GAL4	NOMPC:GFP	8780.78	0.07779
w*;nompC[3],UAS-NompC::GFP/nompC[3];nompC-GAL4	NOMPC:GFP	8804.8	0.0778
w*;nompC[3],UAS-NompC::GFP/nompC[3];nompC-GAL4	NOMPC:GFP	8828.83	0.0778
w*;nompC[3],UAS-NompC::GFP/nompC[3];nompC-GAL4	NOMPC:GFP	8852.85	0.0778
w*;nompC[3],UAS-NompC::GFP/nompC[3];nompC-GAL4	NOMPC:GFP	8876.88	0.07781
w*;nompC[3],UAS-NompC::GFP/nompC[3];nompC-GAL4	NOMPC:GFP	8900.9	0.07781
w*;nompC[3],UAS-NompC::GFP/nompC[3];nompC-GAL4	NOMPC:GFP	8924.92	0.07781
w*;nompC[3],UAS-NompC::GFP/nompC[3];nompC-GAL4	NOMPC:GFP	8948.95	0.07782
w*;nompC[3],UAS-NompC::GFP/nompC[3];nompC-GAL4	NOMPC:GFP	8972.97	0.07782
w*;nompC[3],UAS-NompC::GFP/nompC[3];nompC-GAL4	NOMPC:GFP	8997	0.07782
w*;nompC[3],UAS-NompC::GFP/nompC[3];nompC-GAL4	NOMPC:GFP	9021.02	0.07783
w*;nompC[3],UAS-NompC::GFP/nompC[3];nompC-GAL4	NOMPC:GFP	9045.05	0.07783
w*;nompC[3],UAS-NompC::GFP/nompC[3];nompC-GAL4	NOMPC:GFP	9053.27	0.07783
w*;nompC[3],UAS-NompC::GFP/nompC[3];nompC-GAL4	NOMPC:GFP	9069.07	0.07783
w*;nompC[3],UAS-NompC::GFP/nompC[3];nompC-GAL4	NOMPC:GFP	9093.09	0.07783
w*;nompC[3],UAS-NompC::GFP/nompC[3];nompC-GAL4	NOMPC:GFP	9117.12	0.07784
w*;nompC[3],UAS-NompC::GFP/nompC[3];nompC-GAL4	NOMPC:GFP	9141.14	0.07784
w*;nompC[3],UAS-NompC::GFP/nompC[3];nompC-GAL4	NOMPC:GFP	9165.17	0.07784
w*;nompC[3],UAS-NompC::GFP/nompC[3];nompC-GAL4	NOMPC:GFP	9189.19	0.07785
w*;nompC[3],UAS-NompC::GFP/nompC[3];nompC-GAL4	NOMPC:GFP	9213.21	0.07785
w*;nompC[3],UAS-NompC::GFP/nompC[3];nompC-GAL4	NOMPC:GFP	9237.24	0.07785
w*;nompC[3],UAS-NompC::GFP/nompC[3];nompC-GAL4	NOMPC:GFP	9261.26	0.07785
w*;nompC[3],UAS-NompC::GFP/nompC[3];nompC-GAL4	NOMPC:GFP	9285.29	0.07786
w*;nompC[3],UAS-NompC::GFP/nompC[3];nompC-GAL4	NOMPC:GFP	9309.31	0.07786
w*;nompC[3],UAS-NompC::GFP/nompC[3];nompC-GAL4	NOMPC:GFP	9333.33	0.07786
w*;nompC[3],UAS-NompC::GFP/nompC[3];nompC-GAL4	NOMPC:GFP	9357.36	0.07786
w*;nompC[3],UAS-NompC::GFP/nompC[3];nompC-GAL4	NOMPC:GFP	9381.38	0.07787
w*;nompC[3],UAS-NompC::GFP/nompC[3];nompC-GAL4	NOMPC:GFP	9405.41	0.07787
w*;nompC[3],UAS-NompC::GFP/nompC[3];nompC-GAL4	NOMPC:GFP	9429.43	0.07787
w*;nompC[3],UAS-NompC::GFP/nompC[3];nompC-GAL4	NOMPC:GFP	9453.45	0.07787
w*;nompC[3],UAS-NompC::GFP/nompC[3];nompC-GAL4	NOMPC:GFP	9477.48	0.07787
w*;nompC[3],UAS-NompC::GFP/nompC[3];nompC-GAL4	NOMPC:GFP	9501.5	0.07788
w*;nompC[3],UAS-NompC::GFP/nompC[3];nompC-GAL4	NOMPC:GFP	9525.53	0.07788
w*;nompC[3],UAS-NompC::GFP/nompC[3];nompC-GAL4	NOMPC:GFP	9549.55	0.07788
w*;nompC[3],UAS-NompC::GFP/nompC[3];nompC-GAL4	NOMPC:GFP	9573.57	0.07788
w*;nompC[3],UAS-NompC::GFP/nompC[3];nompC-GAL4	NOMPC:GFP	9597.6	0.07789
w*;nompC[3],UAS-NompC::GFP/nompC[3];nompC-GAL4	NOMPC:GFP	9621.62	0.07789
w*;nompC[3],UAS-NompC::GFP/nompC[3];nompC-GAL4	NOMPC:GFP	9645.65	0.07789
w*;nompC[3],UAS-NompC::GFP/nompC[3];nompC-GAL4	NOMPC:GFP	9669.67	0.07789
w*;nompC[3],UAS-NompC::GFP/nompC[3];nompC-GAL4	NOMPC:GFP	9693.69	0.07789
w*;nompC[3],UAS-NompC::GFP/nompC[3];nompC-GAL4	NOMPC:GFP	9717.72	0.07789
w*;nompC[3],UAS-NompC::GFP/nompC[3];nompC-GAL4	NOMPC:GFP	9741.74	0.0779
w*;nompC[3],UAS-NompC::GFP/nompC[3];nompC-GAL4	NOMPC:GFP	9765.77	0.0779
w*;nompC[3],UAS-NompC::GFP/nompC[3];nompC-GAL4	NOMPC:GFP	9789.79	0.0779
w*;nompC[3],UAS-NompC::GFP/nompC[3];nompC-GAL4	NOMPC:GFP	9813.81	0.0779
w*;nompC[3],UAS-NompC::GFP/nompC[3];nompC-GAL4	NOMPC:GFP	9837.84	0.0779
w*;nompC[3],UAS-NompC::GFP/nompC[3];nompC-GAL4	NOMPC:GFP	9861.86	0.07791
w*;nompC[3],UAS-NompC::GFP/nompC[3];nompC-GAL4	NOMPC:GFP	9885.89	0.07791
w*;nompC[3],UAS-NompC::GFP/nompC[3];nompC-GAL4	NOMPC:GFP	9909.91	0.07791
w*;nompC[3],UAS-NompC::GFP/nompC[3];nompC-GAL4	NOMPC:GFP	9933.93	0.07791
w*;nompC[3],UAS-NompC::GFP/nompC[3];nompC-GAL4	NOMPC:GFP	9957.96	0.07791
w*;nompC[3],UAS-NompC::GFP/nompC[3];nompC-GAL4	NOMPC:GFP	9981.98	0.07791
w*;nompC[3],UAS-NompC::GFP/nompC[3];nompC-GAL4	NOMPC:GFP	10006	0.07791
w*;nompC[3],UAS-NompC::GFP/nompC[3];nompC-GAL4	NOMPC:GFP	10030	0.07792
w*;nompC[3],UAS-NompC::GFP/nompC[3];nompC-GAL4	NOMPC:GFP	10054.1	0.07792
w*;nompC[3],UAS-NompC::GFP/nompC[3];nompC-GAL4	NOMPC:GFP	10078.1	0.07792
w*;nompC[3],UAS-NompC::GFP/nompC[3];nompC-GAL4	NOMPC:GFP	10102.1	0.07792
w*;nompC[3],UAS-NompC::GFP/nompC[3];nompC-GAL4	NOMPC:GFP	10126.1	0.07792
w*;nompC[3],UAS-NompC::GFP/nompC[3];nompC-GAL4	NOMPC:GFP	10150.2	0.07792
w*;nompC[3],UAS-NompC::GFP/nompC[3];nompC-GAL4	NOMPC:GFP	10174.2	0.07792
w*;nompC[3],UAS-NompC::GFP/nompC[3];nompC-GAL4	NOMPC:GFP	10198.2	0.07793
w*;nompC[3],UAS-NompC::GFP/nompC[3];nompC-GAL4	NOMPC:GFP	10222.2	0.07793
w*;nompC[3],UAS-NompC::GFP/nompC[3];nompC-GAL4	NOMPC:GFP	10246.2	0.07793
w*;nompC[3],UAS-NompC::GFP/nompC[3];nompC-GAL4	NOMPC:GFP	10270.3	0.07793
w*;nompC[3],UAS-NompC::GFP/nompC[3];nompC-GAL4	NOMPC:GFP	10294.3	0.07793
w*;nompC[3],UAS-NompC::GFP/nompC[3];nompC-GAL4	NOMPC:GFP	10318.3	0.07793
w*;nompC[3],UAS-NompC::GFP/nompC[3];nompC-GAL4	NOMPC:GFP	10342.3	0.07793
w*;nompC[3],UAS-NompC::GFP/nompC[3];nompC-GAL4	NOMPC:GFP	10366.4	0.07793
w*;nompC[3],UAS-NompC::GFP/nompC[3];nompC-GAL4	NOMPC:GFP	10390.4	0.07794
w*;nompC[3],UAS-NompC::GFP/nompC[3];nompC-GAL4	NOMPC:GFP	10493.5	0.07794
w*;nompC[3],UAS-NompC::GFP/nompC[3];nompC-GAL4	NOMPC:GFP	10934	0.07796
w*;nompC[3],UAS-NompC::GFP/nompC[3];nompC-GAL4	NOMPC:GFP	11610.9	0.07797
w*;nompC[3],UAS-NompC::GFP/nompC[3];nompC-GAL4	NOMPC:GFP	11660.6	0.07797
w*;nompC[3],UAS-NompC::GFP/nompC[3];nompC-GAL4	NOMPC:GFP	12000	0.07798
w*;nompC[3],UAS-LH+LH-NompC::GFP/nompC[3];nompC-GAL4	LH+LH-NOMPC:GFP	-12000	0.06999
w*;nompC[3],UAS-LH+LH-NompC::GFP/nompC[3];nompC-GAL4	LH+LH-NOMPC:GFP	-10438.4	0.06998
w*;nompC[3],UAS-LH+LH-NompC::GFP/nompC[3];nompC-GAL4	LH+LH-NOMPC:GFP	-10414.4	0.06997
w*;nompC[3],UAS-LH+LH-NompC::GFP/nompC[3];nompC-GAL4	LH+LH-NOMPC:GFP	-10390.4	0.06997
w*;nompC[3],UAS-LH+LH-NompC::GFP/nompC[3];nompC-GAL4	LH+LH-NOMPC:GFP	-10366.4	0.06997
w*;nompC[3],UAS-LH+LH-NompC::GFP/nompC[3];nompC-GAL4	LH+LH-NOMPC:GFP	-10342.3	0.06997
w*;nompC[3],UAS-LH+LH-NompC::GFP/nompC[3];nompC-GAL4	LH+LH-NOMPC:GFP	-10318.3	0.06997
w*;nompC[3],UAS-LH+LH-NompC::GFP/nompC[3];nompC-GAL4	LH+LH-NOMPC:GFP	-10294.3	0.06997
w*;nompC[3],UAS-LH+LH-NompC::GFP/nompC[3];nompC-GAL4	LH+LH-NOMPC:GFP	-10270.3	0.06997
w*;nompC[3],UAS-LH+LH-NompC::GFP/nompC[3];nompC-GAL4	LH+LH-NOMPC:GFP	-10246.2	0.06997
w*;nompC[3],UAS-LH+LH-NompC::GFP/nompC[3];nompC-GAL4	LH+LH-NOMPC:GFP	-10222.2	0.06997
w*;nompC[3],UAS-LH+LH-NompC::GFP/nompC[3];nompC-GAL4	LH+LH-NOMPC:GFP	-10198.2	0.06997
w*;nompC[3],UAS-LH+LH-NompC::GFP/nompC[3];nompC-GAL4	LH+LH-NOMPC:GFP	-10174.2	0.06997
w*;nompC[3],UAS-LH+LH-NompC::GFP/nompC[3];nompC-GAL4	LH+LH-NOMPC:GFP	-10150.2	0.06997
w*;nompC[3],UAS-LH+LH-NompC::GFP/nompC[3];nompC-GAL4	LH+LH-NOMPC:GFP	-10126.1	0.06997
w*;nompC[3],UAS-LH+LH-NompC::GFP/nompC[3];nompC-GAL4	LH+LH-NOMPC:GFP	-10102.1	0.06997
w*;nompC[3],UAS-LH+LH-NompC::GFP/nompC[3];nompC-GAL4	LH+LH-NOMPC:GFP	-10078.1	0.06997
w*;nompC[3],UAS-LH+LH-NompC::GFP/nompC[3];nompC-GAL4	LH+LH-NOMPC:GFP	-10054.1	0.06997
w*;nompC[3],UAS-LH+LH-NompC::GFP/nompC[3];nompC-GAL4	LH+LH-NOMPC:GFP	-10030	0.06997
w*;nompC[3],UAS-LH+LH-NompC::GFP/nompC[3];nompC-GAL4	LH+LH-NOMPC:GFP	-10021.2	0.06997
w*;nompC[3],UAS-LH+LH-NompC::GFP/nompC[3];nompC-GAL4	LH+LH-NOMPC:GFP	-10006	0.06997
w*;nompC[3],UAS-LH+LH-NompC::GFP/nompC[3];nompC-GAL4	LH+LH-NOMPC:GFP	-9981.98	0.06996
w*;nompC[3],UAS-LH+LH-NompC::GFP/nompC[3];nompC-GAL4	LH+LH-NOMPC:GFP	-9957.96	0.06996
w*;nompC[3],UAS-LH+LH-NompC::GFP/nompC[3];nompC-GAL4	LH+LH-NOMPC:GFP	-9933.93	0.06996
w*;nompC[3],UAS-LH+LH-NompC::GFP/nompC[3];nompC-GAL4	LH+LH-NOMPC:GFP	-9909.91	0.06996
w*;nompC[3],UAS-LH+LH-NompC::GFP/nompC[3];nompC-GAL4	LH+LH-NOMPC:GFP	-9885.89	0.06996
w*;nompC[3],UAS-LH+LH-NompC::GFP/nompC[3];nompC-GAL4	LH+LH-NOMPC:GFP	-9861.86	0.06996
w*;nompC[3],UAS-LH+LH-NompC::GFP/nompC[3];nompC-GAL4	LH+LH-NOMPC:GFP	-9837.84	0.06996
w*;nompC[3],UAS-LH+LH-NompC::GFP/nompC[3];nompC-GAL4	LH+LH-NOMPC:GFP	-9813.81	0.06996
w*;nompC[3],UAS-LH+LH-NompC::GFP/nompC[3];nompC-GAL4	LH+LH-NOMPC:GFP	-9789.79	0.06996
w*;nompC[3],UAS-LH+LH-NompC::GFP/nompC[3];nompC-GAL4	LH+LH-NOMPC:GFP	-9765.77	0.06996
w*;nompC[3],UAS-LH+LH-NompC::GFP/nompC[3];nompC-GAL4	LH+LH-NOMPC:GFP	-9741.74	0.06996
w*;nompC[3],UAS-LH+LH-NompC::GFP/nompC[3];nompC-GAL4	LH+LH-NOMPC:GFP	-9717.72	0.06996
w*;nompC[3],UAS-LH+LH-NompC::GFP/nompC[3];nompC-GAL4	LH+LH-NOMPC:GFP	-9693.69	0.06996
w*;nompC[3],UAS-LH+LH-NompC::GFP/nompC[3];nompC-GAL4	LH+LH-NOMPC:GFP	-9669.67	0.06995
w*;nompC[3],UAS-LH+LH-NompC::GFP/nompC[3];nompC-GAL4	LH+LH-NOMPC:GFP	-9645.65	0.06995
w*;nompC[3],UAS-LH+LH-NompC::GFP/nompC[3];nompC-GAL4	LH+LH-NOMPC:GFP	-9621.62	0.06995
w*;nompC[3],UAS-LH+LH-NompC::GFP/nompC[3];nompC-GAL4	LH+LH-NOMPC:GFP	-9597.6	0.06995
w*;nompC[3],UAS-LH+LH-NompC::GFP/nompC[3];nompC-GAL4	LH+LH-NOMPC:GFP	-9573.57	0.06995
w*;nompC[3],UAS-LH+LH-NompC::GFP/nompC[3];nompC-GAL4	LH+LH-NOMPC:GFP	-9549.55	0.06995
w*;nompC[3],UAS-LH+LH-NompC::GFP/nompC[3];nompC-GAL4	LH+LH-NOMPC:GFP	-9525.53	0.06995
w*;nompC[3],UAS-LH+LH-NompC::GFP/nompC[3];nompC-GAL4	LH+LH-NOMPC:GFP	-9501.5	0.06995
w*;nompC[3],UAS-LH+LH-NompC::GFP/nompC[3];nompC-GAL4	LH+LH-NOMPC:GFP	-9477.48	0.06995
w*;nompC[3],UAS-LH+LH-NompC::GFP/nompC[3];nompC-GAL4	LH+LH-NOMPC:GFP	-9453.45	0.06995
w*;nompC[3],UAS-LH+LH-NompC::GFP/nompC[3];nompC-GAL4	LH+LH-NOMPC:GFP	-9429.43	0.06995
w*;nompC[3],UAS-LH+LH-NompC::GFP/nompC[3];nompC-GAL4	LH+LH-NOMPC:GFP	-9405.41	0.06994
w*;nompC[3],UAS-LH+LH-NompC::GFP/nompC[3];nompC-GAL4	LH+LH-NOMPC:GFP	-9381.38	0.06994
w*;nompC[3],UAS-LH+LH-NompC::GFP/nompC[3];nompC-GAL4	LH+LH-NOMPC:GFP	-9357.36	0.06994
w*;nompC[3],UAS-LH+LH-NompC::GFP/nompC[3];nompC-GAL4	LH+LH-NOMPC:GFP	-9333.33	0.06994
w*;nompC[3],UAS-LH+LH-NompC::GFP/nompC[3];nompC-GAL4	LH+LH-NOMPC:GFP	-9309.31	0.06994
w*;nompC[3],UAS-LH+LH-NompC::GFP/nompC[3];nompC-GAL4	LH+LH-NOMPC:GFP	-9285.29	0.06994
w*;nompC[3],UAS-LH+LH-NompC::GFP/nompC[3];nompC-GAL4	LH+LH-NOMPC:GFP	-9261.26	0.06994
w*;nompC[3],UAS-LH+LH-NompC::GFP/nompC[3];nompC-GAL4	LH+LH-NOMPC:GFP	-9237.24	0.06994
w*;nompC[3],UAS-LH+LH-NompC::GFP/nompC[3];nompC-GAL4	LH+LH-NOMPC:GFP	-9213.21	0.06994
w*;nompC[3],UAS-LH+LH-NompC::GFP/nompC[3];nompC-GAL4	LH+LH-NOMPC:GFP	-9189.19	0.06993
w*;nompC[3],UAS-LH+LH-NompC::GFP/nompC[3];nompC-GAL4	LH+LH-NOMPC:GFP	-9165.17	0.06993
w*;nompC[3],UAS-LH+LH-NompC::GFP/nompC[3];nompC-GAL4	LH+LH-NOMPC:GFP	-9141.14	0.06993
w*;nompC[3],UAS-LH+LH-NompC::GFP/nompC[3];nompC-GAL4	LH+LH-NOMPC:GFP	-9117.12	0.06993
w*;nompC[3],UAS-LH+LH-NompC::GFP/nompC[3];nompC-GAL4	LH+LH-NOMPC:GFP	-9093.09	0.06993
w*;nompC[3],UAS-LH+LH-NompC::GFP/nompC[3];nompC-GAL4	LH+LH-NOMPC:GFP	-9069.07	0.06993
w*;nompC[3],UAS-LH+LH-NompC::GFP/nompC[3];nompC-GAL4	LH+LH-NOMPC:GFP	-9045.05	0.06993
w*;nompC[3],UAS-LH+LH-NompC::GFP/nompC[3];nompC-GAL4	LH+LH-NOMPC:GFP	-9021.02	0.06992
w*;nompC[3],UAS-LH+LH-NompC::GFP/nompC[3];nompC-GAL4	LH+LH-NOMPC:GFP	-8997	0.06992
w*;nompC[3],UAS-LH+LH-NompC::GFP/nompC[3];nompC-GAL4	LH+LH-NOMPC:GFP	-8972.97	0.06992
w*;nompC[3],UAS-LH+LH-NompC::GFP/nompC[3];nompC-GAL4	LH+LH-NOMPC:GFP	-8948.95	0.06992
w*;nompC[3],UAS-LH+LH-NompC::GFP/nompC[3];nompC-GAL4	LH+LH-NOMPC:GFP	-8934.48	0.06992
w*;nompC[3],UAS-LH+LH-NompC::GFP/nompC[3];nompC-GAL4	LH+LH-NOMPC:GFP	-8924.92	0.06992
w*;nompC[3],UAS-LH+LH-NompC::GFP/nompC[3];nompC-GAL4	LH+LH-NOMPC:GFP	-8900.9	0.06992
w*;nompC[3],UAS-LH+LH-NompC::GFP/nompC[3];nompC-GAL4	LH+LH-NOMPC:GFP	-8876.88	0.06992
w*;nompC[3],UAS-LH+LH-NompC::GFP/nompC[3];nompC-GAL4	LH+LH-NOMPC:GFP	-8852.85	0.06991
w*;nompC[3],UAS-LH+LH-NompC::GFP/nompC[3];nompC-GAL4	LH+LH-NOMPC:GFP	-8828.83	0.06991
w*;nompC[3],UAS-LH+LH-NompC::GFP/nompC[3];nompC-GAL4	LH+LH-NOMPC:GFP	-8804.8	0.06991
w*;nompC[3],UAS-LH+LH-NompC::GFP/nompC[3];nompC-GAL4	LH+LH-NOMPC:GFP	-8784.87	0.06991
w*;nompC[3],UAS-LH+LH-NompC::GFP/nompC[3];nompC-GAL4	LH+LH-NOMPC:GFP	-8780.78	0.06991
w*;nompC[3],UAS-LH+LH-NompC::GFP/nompC[3];nompC-GAL4	LH+LH-NOMPC:GFP	-8756.76	0.06991
w*;nompC[3],UAS-LH+LH-NompC::GFP/nompC[3];nompC-GAL4	LH+LH-NOMPC:GFP	-8732.73	0.06991
w*;nompC[3],UAS-LH+LH-NompC::GFP/nompC[3];nompC-GAL4	LH+LH-NOMPC:GFP	-8708.71	0.0699
w*;nompC[3],UAS-LH+LH-NompC::GFP/nompC[3];nompC-GAL4	LH+LH-NOMPC:GFP	-8684.68	0.0699
w*;nompC[3],UAS-LH+LH-NompC::GFP/nompC[3];nompC-GAL4	LH+LH-NOMPC:GFP	-8660.66	0.0699
w*;nompC[3],UAS-LH+LH-NompC::GFP/nompC[3];nompC-GAL4	LH+LH-NOMPC:GFP	-8636.64	0.0699
w*;nompC[3],UAS-LH+LH-NompC::GFP/nompC[3];nompC-GAL4	LH+LH-NOMPC:GFP	-8612.61	0.0699
w*;nompC[3],UAS-LH+LH-NompC::GFP/nompC[3];nompC-GAL4	LH+LH-NOMPC:GFP	-8588.59	0.06989
w*;nompC[3],UAS-LH+LH-NompC::GFP/nompC[3];nompC-GAL4	LH+LH-NOMPC:GFP	-8564.56	0.06989
w*;nompC[3],UAS-LH+LH-NompC::GFP/nompC[3];nompC-GAL4	LH+LH-NOMPC:GFP	-8540.54	0.06989
w*;nompC[3],UAS-LH+LH-NompC::GFP/nompC[3];nompC-GAL4	LH+LH-NOMPC:GFP	-8516.52	0.06989
w*;nompC[3],UAS-LH+LH-NompC::GFP/nompC[3];nompC-GAL4	LH+LH-NOMPC:GFP	-8492.49	0.06989
w*;nompC[3],UAS-LH+LH-NompC::GFP/nompC[3];nompC-GAL4	LH+LH-NOMPC:GFP	-8468.47	0.06988
w*;nompC[3],UAS-LH+LH-NompC::GFP/nompC[3];nompC-GAL4	LH+LH-NOMPC:GFP	-8444.44	0.06988
w*;nompC[3],UAS-LH+LH-NompC::GFP/nompC[3];nompC-GAL4	LH+LH-NOMPC:GFP	-8420.42	0.06988
w*;nompC[3],UAS-LH+LH-NompC::GFP/nompC[3];nompC-GAL4	LH+LH-NOMPC:GFP	-8396.4	0.06988
w*;nompC[3],UAS-LH+LH-NompC::GFP/nompC[3];nompC-GAL4	LH+LH-NOMPC:GFP	-8372.37	0.06988
w*;nompC[3],UAS-LH+LH-NompC::GFP/nompC[3];nompC-GAL4	LH+LH-NOMPC:GFP	-8348.35	0.06987
w*;nompC[3],UAS-LH+LH-NompC::GFP/nompC[3];nompC-GAL4	LH+LH-NOMPC:GFP	-8324.32	0.06987
w*;nompC[3],UAS-LH+LH-NompC::GFP/nompC[3];nompC-GAL4	LH+LH-NOMPC:GFP	-8300.3	0.06987
w*;nompC[3],UAS-LH+LH-NompC::GFP/nompC[3];nompC-GAL4	LH+LH-NOMPC:GFP	-8276.28	0.06987
w*;nompC[3],UAS-LH+LH-NompC::GFP/nompC[3];nompC-GAL4	LH+LH-NOMPC:GFP	-8252.25	0.06986
w*;nompC[3],UAS-LH+LH-NompC::GFP/nompC[3];nompC-GAL4	LH+LH-NOMPC:GFP	-8228.23	0.06986
w*;nompC[3],UAS-LH+LH-NompC::GFP/nompC[3];nompC-GAL4	LH+LH-NOMPC:GFP	-8204.2	0.06986
w*;nompC[3],UAS-LH+LH-NompC::GFP/nompC[3];nompC-GAL4	LH+LH-NOMPC:GFP	-8180.18	0.06986
w*;nompC[3],UAS-LH+LH-NompC::GFP/nompC[3];nompC-GAL4	LH+LH-NOMPC:GFP	-8156.93	0.06985
w*;nompC[3],UAS-LH+LH-NompC::GFP/nompC[3];nompC-GAL4	LH+LH-NOMPC:GFP	-8156.16	0.06985
w*;nompC[3],UAS-LH+LH-NompC::GFP/nompC[3];nompC-GAL4	LH+LH-NOMPC:GFP	-8132.13	0.06985
w*;nompC[3],UAS-LH+LH-NompC::GFP/nompC[3];nompC-GAL4	LH+LH-NOMPC:GFP	-8108.11	0.06985
w*;nompC[3],UAS-LH+LH-NompC::GFP/nompC[3];nompC-GAL4	LH+LH-NOMPC:GFP	-8084.08	0.06984
w*;nompC[3],UAS-LH+LH-NompC::GFP/nompC[3];nompC-GAL4	LH+LH-NOMPC:GFP	-8060.06	0.06984
w*;nompC[3],UAS-LH+LH-NompC::GFP/nompC[3];nompC-GAL4	LH+LH-NOMPC:GFP	-8036.04	0.06984
w*;nompC[3],UAS-LH+LH-NompC::GFP/nompC[3];nompC-GAL4	LH+LH-NOMPC:GFP	-8012.01	0.06984
w*;nompC[3],UAS-LH+LH-NompC::GFP/nompC[3];nompC-GAL4	LH+LH-NOMPC:GFP	-7987.99	0.06983
w*;nompC[3],UAS-LH+LH-NompC::GFP/nompC[3];nompC-GAL4	LH+LH-NOMPC:GFP	-7963.96	0.06983
w*;nompC[3],UAS-LH+LH-NompC::GFP/nompC[3];nompC-GAL4	LH+LH-NOMPC:GFP	-7939.94	0.06983
w*;nompC[3],UAS-LH+LH-NompC::GFP/nompC[3];nompC-GAL4	LH+LH-NOMPC:GFP	-7915.92	0.06982
w*;nompC[3],UAS-LH+LH-NompC::GFP/nompC[3];nompC-GAL4	LH+LH-NOMPC:GFP	-7891.89	0.06982
w*;nompC[3],UAS-LH+LH-NompC::GFP/nompC[3];nompC-GAL4	LH+LH-NOMPC:GFP	-7867.87	0.06982
w*;nompC[3],UAS-LH+LH-NompC::GFP/nompC[3];nompC-GAL4	LH+LH-NOMPC:GFP	-7843.84	0.06981
w*;nompC[3],UAS-LH+LH-NompC::GFP/nompC[3];nompC-GAL4	LH+LH-NOMPC:GFP	-7819.82	0.06981
w*;nompC[3],UAS-LH+LH-NompC::GFP/nompC[3];nompC-GAL4	LH+LH-NOMPC:GFP	-7795.8	0.06981
w*;nompC[3],UAS-LH+LH-NompC::GFP/nompC[3];nompC-GAL4	LH+LH-NOMPC:GFP	-7771.77	0.0698
w*;nompC[3],UAS-LH+LH-NompC::GFP/nompC[3];nompC-GAL4	LH+LH-NOMPC:GFP	-7747.75	0.0698
w*;nompC[3],UAS-LH+LH-NompC::GFP/nompC[3];nompC-GAL4	LH+LH-NOMPC:GFP	-7723.72	0.06979
w*;nompC[3],UAS-LH+LH-NompC::GFP/nompC[3];nompC-GAL4	LH+LH-NOMPC:GFP	-7699.7	0.06979
w*;nompC[3],UAS-LH+LH-NompC::GFP/nompC[3];nompC-GAL4	LH+LH-NOMPC:GFP	-7675.68	0.06979
w*;nompC[3],UAS-LH+LH-NompC::GFP/nompC[3];nompC-GAL4	LH+LH-NOMPC:GFP	-7651.65	0.06978
w*;nompC[3],UAS-LH+LH-NompC::GFP/nompC[3];nompC-GAL4	LH+LH-NOMPC:GFP	-7627.63	0.06978
w*;nompC[3],UAS-LH+LH-NompC::GFP/nompC[3];nompC-GAL4	LH+LH-NOMPC:GFP	-7603.6	0.06977
w*;nompC[3],UAS-LH+LH-NompC::GFP/nompC[3];nompC-GAL4	LH+LH-NOMPC:GFP	-7579.58	0.06977
w*;nompC[3],UAS-LH+LH-NompC::GFP/nompC[3];nompC-GAL4	LH+LH-NOMPC:GFP	-7555.56	0.06977
w*;nompC[3],UAS-LH+LH-NompC::GFP/nompC[3];nompC-GAL4	LH+LH-NOMPC:GFP	-7531.53	0.06976
w*;nompC[3],UAS-LH+LH-NompC::GFP/nompC[3];nompC-GAL4	LH+LH-NOMPC:GFP	-7507.51	0.06976
w*;nompC[3],UAS-LH+LH-NompC::GFP/nompC[3];nompC-GAL4	LH+LH-NOMPC:GFP	-7483.48	0.06975
w*;nompC[3],UAS-LH+LH-NompC::GFP/nompC[3];nompC-GAL4	LH+LH-NOMPC:GFP	-7459.46	0.06975
w*;nompC[3],UAS-LH+LH-NompC::GFP/nompC[3];nompC-GAL4	LH+LH-NOMPC:GFP	-7435.44	0.06974
w*;nompC[3],UAS-LH+LH-NompC::GFP/nompC[3];nompC-GAL4	LH+LH-NOMPC:GFP	-7411.41	0.06974
w*;nompC[3],UAS-LH+LH-NompC::GFP/nompC[3];nompC-GAL4	LH+LH-NOMPC:GFP	-7387.39	0.06973
w*;nompC[3],UAS-LH+LH-NompC::GFP/nompC[3];nompC-GAL4	LH+LH-NOMPC:GFP	-7363.36	0.06973
w*;nompC[3],UAS-LH+LH-NompC::GFP/nompC[3];nompC-GAL4	LH+LH-NOMPC:GFP	-7356.76	0.06973
w*;nompC[3],UAS-LH+LH-NompC::GFP/nompC[3];nompC-GAL4	LH+LH-NOMPC:GFP	-7339.34	0.06972
w*;nompC[3],UAS-LH+LH-NompC::GFP/nompC[3];nompC-GAL4	LH+LH-NOMPC:GFP	-7315.32	0.06972
w*;nompC[3],UAS-LH+LH-NompC::GFP/nompC[3];nompC-GAL4	LH+LH-NOMPC:GFP	-7291.29	0.06971
w*;nompC[3],UAS-LH+LH-NompC::GFP/nompC[3];nompC-GAL4	LH+LH-NOMPC:GFP	-7267.27	0.06971
w*;nompC[3],UAS-LH+LH-NompC::GFP/nompC[3];nompC-GAL4	LH+LH-NOMPC:GFP	-7243.24	0.0697
w*;nompC[3],UAS-LH+LH-NompC::GFP/nompC[3];nompC-GAL4	LH+LH-NOMPC:GFP	-7219.22	0.0697
w*;nompC[3],UAS-LH+LH-NompC::GFP/nompC[3];nompC-GAL4	LH+LH-NOMPC:GFP	-7195.2	0.06969
w*;nompC[3],UAS-LH+LH-NompC::GFP/nompC[3];nompC-GAL4	LH+LH-NOMPC:GFP	-7171.17	0.06968
w*;nompC[3],UAS-LH+LH-NompC::GFP/nompC[3];nompC-GAL4	LH+LH-NOMPC:GFP	-7147.15	0.06968
w*;nompC[3],UAS-LH+LH-NompC::GFP/nompC[3];nompC-GAL4	LH+LH-NOMPC:GFP	-7123.12	0.06967
w*;nompC[3],UAS-LH+LH-NompC::GFP/nompC[3];nompC-GAL4	LH+LH-NOMPC:GFP	-7099.1	0.06967
w*;nompC[3],UAS-LH+LH-NompC::GFP/nompC[3];nompC-GAL4	LH+LH-NOMPC:GFP	-7075.08	0.06966
w*;nompC[3],UAS-LH+LH-NompC::GFP/nompC[3];nompC-GAL4	LH+LH-NOMPC:GFP	-7051.05	0.06965
w*;nompC[3],UAS-LH+LH-NompC::GFP/nompC[3];nompC-GAL4	LH+LH-NOMPC:GFP	-7027.03	0.06965
w*;nompC[3],UAS-LH+LH-NompC::GFP/nompC[3];nompC-GAL4	LH+LH-NOMPC:GFP	-7003	0.06964
w*;nompC[3],UAS-LH+LH-NompC::GFP/nompC[3];nompC-GAL4	LH+LH-NOMPC:GFP	-6978.98	0.06963
w*;nompC[3],UAS-LH+LH-NompC::GFP/nompC[3];nompC-GAL4	LH+LH-NOMPC:GFP	-6954.95	0.06963
w*;nompC[3],UAS-LH+LH-NompC::GFP/nompC[3];nompC-GAL4	LH+LH-NOMPC:GFP	-6930.93	0.06962
w*;nompC[3],UAS-LH+LH-NompC::GFP/nompC[3];nompC-GAL4	LH+LH-NOMPC:GFP	-6906.91	0.06961
w*;nompC[3],UAS-LH+LH-NompC::GFP/nompC[3];nompC-GAL4	LH+LH-NOMPC:GFP	-6882.88	0.0696
w*;nompC[3],UAS-LH+LH-NompC::GFP/nompC[3];nompC-GAL4	LH+LH-NOMPC:GFP	-6858.86	0.0696
w*;nompC[3],UAS-LH+LH-NompC::GFP/nompC[3];nompC-GAL4	LH+LH-NOMPC:GFP	-6834.83	0.06959
w*;nompC[3],UAS-LH+LH-NompC::GFP/nompC[3];nompC-GAL4	LH+LH-NOMPC:GFP	-6810.81	0.06958
w*;nompC[3],UAS-LH+LH-NompC::GFP/nompC[3];nompC-GAL4	LH+LH-NOMPC:GFP	-6786.79	0.06957
w*;nompC[3],UAS-LH+LH-NompC::GFP/nompC[3];nompC-GAL4	LH+LH-NOMPC:GFP	-6762.76	0.06957
w*;nompC[3],UAS-LH+LH-NompC::GFP/nompC[3];nompC-GAL4	LH+LH-NOMPC:GFP	-6738.74	0.06956
w*;nompC[3],UAS-LH+LH-NompC::GFP/nompC[3];nompC-GAL4	LH+LH-NOMPC:GFP	-6714.71	0.06955
w*;nompC[3],UAS-LH+LH-NompC::GFP/nompC[3];nompC-GAL4	LH+LH-NOMPC:GFP	-6690.69	0.06954
w*;nompC[3],UAS-LH+LH-NompC::GFP/nompC[3];nompC-GAL4	LH+LH-NOMPC:GFP	-6666.67	0.06953
w*;nompC[3],UAS-LH+LH-NompC::GFP/nompC[3];nompC-GAL4	LH+LH-NOMPC:GFP	-6642.64	0.06952
w*;nompC[3],UAS-LH+LH-NompC::GFP/nompC[3];nompC-GAL4	LH+LH-NOMPC:GFP	-6618.62	0.06952
w*;nompC[3],UAS-LH+LH-NompC::GFP/nompC[3];nompC-GAL4	LH+LH-NOMPC:GFP	-6594.59	0.06951
w*;nompC[3],UAS-LH+LH-NompC::GFP/nompC[3];nompC-GAL4	LH+LH-NOMPC:GFP	-6570.57	0.0695
w*;nompC[3],UAS-LH+LH-NompC::GFP/nompC[3];nompC-GAL4	LH+LH-NOMPC:GFP	-6546.55	0.06949
w*;nompC[3],UAS-LH+LH-NompC::GFP/nompC[3];nompC-GAL4	LH+LH-NOMPC:GFP	-6522.52	0.06948
w*;nompC[3],UAS-LH+LH-NompC::GFP/nompC[3];nompC-GAL4	LH+LH-NOMPC:GFP	-6498.5	0.06947
w*;nompC[3],UAS-LH+LH-NompC::GFP/nompC[3];nompC-GAL4	LH+LH-NOMPC:GFP	-6474.47	0.06946
w*;nompC[3],UAS-LH+LH-NompC::GFP/nompC[3];nompC-GAL4	LH+LH-NOMPC:GFP	-6450.45	0.06945
w*;nompC[3],UAS-LH+LH-NompC::GFP/nompC[3];nompC-GAL4	LH+LH-NOMPC:GFP	-6426.43	0.06944
w*;nompC[3],UAS-LH+LH-NompC::GFP/nompC[3];nompC-GAL4	LH+LH-NOMPC:GFP	-6402.4	0.06943
w*;nompC[3],UAS-LH+LH-NompC::GFP/nompC[3];nompC-GAL4	LH+LH-NOMPC:GFP	-6378.38	0.06942
w*;nompC[3],UAS-LH+LH-NompC::GFP/nompC[3];nompC-GAL4	LH+LH-NOMPC:GFP	-6354.35	0.06941
w*;nompC[3],UAS-LH+LH-NompC::GFP/nompC[3];nompC-GAL4	LH+LH-NOMPC:GFP	-6330.33	0.06939
w*;nompC[3],UAS-LH+LH-NompC::GFP/nompC[3];nompC-GAL4	LH+LH-NOMPC:GFP	-6306.31	0.06938
w*;nompC[3],UAS-LH+LH-NompC::GFP/nompC[3];nompC-GAL4	LH+LH-NOMPC:GFP	-6282.28	0.06937
w*;nompC[3],UAS-LH+LH-NompC::GFP/nompC[3];nompC-GAL4	LH+LH-NOMPC:GFP	-6258.26	0.06936
w*;nompC[3],UAS-LH+LH-NompC::GFP/nompC[3];nompC-GAL4	LH+LH-NOMPC:GFP	-6234.23	0.06935
w*;nompC[3],UAS-LH+LH-NompC::GFP/nompC[3];nompC-GAL4	LH+LH-NOMPC:GFP	-6210.21	0.06934
w*;nompC[3],UAS-LH+LH-NompC::GFP/nompC[3];nompC-GAL4	LH+LH-NOMPC:GFP	-6186.19	0.06932
w*;nompC[3],UAS-LH+LH-NompC::GFP/nompC[3];nompC-GAL4	LH+LH-NOMPC:GFP	-6162.16	0.06931
w*;nompC[3],UAS-LH+LH-NompC::GFP/nompC[3];nompC-GAL4	LH+LH-NOMPC:GFP	-6138.14	0.0693
w*;nompC[3],UAS-LH+LH-NompC::GFP/nompC[3];nompC-GAL4	LH+LH-NOMPC:GFP	-6114.11	0.06928
w*;nompC[3],UAS-LH+LH-NompC::GFP/nompC[3];nompC-GAL4	LH+LH-NOMPC:GFP	-6090.09	0.06927
w*;nompC[3],UAS-LH+LH-NompC::GFP/nompC[3];nompC-GAL4	LH+LH-NOMPC:GFP	-6066.07	0.06926
w*;nompC[3],UAS-LH+LH-NompC::GFP/nompC[3];nompC-GAL4	LH+LH-NOMPC:GFP	-6042.04	0.06924
w*;nompC[3],UAS-LH+LH-NompC::GFP/nompC[3];nompC-GAL4	LH+LH-NOMPC:GFP	-6018.02	0.06923
w*;nompC[3],UAS-LH+LH-NompC::GFP/nompC[3];nompC-GAL4	LH+LH-NOMPC:GFP	-5993.99	0.06922
w*;nompC[3],UAS-LH+LH-NompC::GFP/nompC[3];nompC-GAL4	LH+LH-NOMPC:GFP	-5969.97	0.0692
w*;nompC[3],UAS-LH+LH-NompC::GFP/nompC[3];nompC-GAL4	LH+LH-NOMPC:GFP	-5945.95	0.06919
w*;nompC[3],UAS-LH+LH-NompC::GFP/nompC[3];nompC-GAL4	LH+LH-NOMPC:GFP	-5930.32	0.06918
w*;nompC[3],UAS-LH+LH-NompC::GFP/nompC[3];nompC-GAL4	LH+LH-NOMPC:GFP	-5921.92	0.06917
w*;nompC[3],UAS-LH+LH-NompC::GFP/nompC[3];nompC-GAL4	LH+LH-NOMPC:GFP	-5897.9	0.06916
w*;nompC[3],UAS-LH+LH-NompC::GFP/nompC[3];nompC-GAL4	LH+LH-NOMPC:GFP	-5873.87	0.06914
w*;nompC[3],UAS-LH+LH-NompC::GFP/nompC[3];nompC-GAL4	LH+LH-NOMPC:GFP	-5856.95	0.06913
w*;nompC[3],UAS-LH+LH-NompC::GFP/nompC[3];nompC-GAL4	LH+LH-NOMPC:GFP	-5849.85	0.06912
w*;nompC[3],UAS-LH+LH-NompC::GFP/nompC[3];nompC-GAL4	LH+LH-NOMPC:GFP	-5825.83	0.06911
w*;nompC[3],UAS-LH+LH-NompC::GFP/nompC[3];nompC-GAL4	LH+LH-NOMPC:GFP	-5801.8	0.06909
w*;nompC[3],UAS-LH+LH-NompC::GFP/nompC[3];nompC-GAL4	LH+LH-NOMPC:GFP	-5777.78	0.06907
w*;nompC[3],UAS-LH+LH-NompC::GFP/nompC[3];nompC-GAL4	LH+LH-NOMPC:GFP	-5753.75	0.06906
w*;nompC[3],UAS-LH+LH-NompC::GFP/nompC[3];nompC-GAL4	LH+LH-NOMPC:GFP	-5729.73	0.06904
w*;nompC[3],UAS-LH+LH-NompC::GFP/nompC[3];nompC-GAL4	LH+LH-NOMPC:GFP	-5705.71	0.06902
w*;nompC[3],UAS-LH+LH-NompC::GFP/nompC[3];nompC-GAL4	LH+LH-NOMPC:GFP	-5681.68	0.069
w*;nompC[3],UAS-LH+LH-NompC::GFP/nompC[3];nompC-GAL4	LH+LH-NOMPC:GFP	-5657.66	0.06899
w*;nompC[3],UAS-LH+LH-NompC::GFP/nompC[3];nompC-GAL4	LH+LH-NOMPC:GFP	-5633.63	0.06897
w*;nompC[3],UAS-LH+LH-NompC::GFP/nompC[3];nompC-GAL4	LH+LH-NOMPC:GFP	-5609.61	0.06895
w*;nompC[3],UAS-LH+LH-NompC::GFP/nompC[3];nompC-GAL4	LH+LH-NOMPC:GFP	-5585.59	0.06893
w*;nompC[3],UAS-LH+LH-NompC::GFP/nompC[3];nompC-GAL4	LH+LH-NOMPC:GFP	-5561.56	0.06891
w*;nompC[3],UAS-LH+LH-NompC::GFP/nompC[3];nompC-GAL4	LH+LH-NOMPC:GFP	-5537.54	0.06889
w*;nompC[3],UAS-LH+LH-NompC::GFP/nompC[3];nompC-GAL4	LH+LH-NOMPC:GFP	-5513.51	0.06887
w*;nompC[3],UAS-LH+LH-NompC::GFP/nompC[3];nompC-GAL4	LH+LH-NOMPC:GFP	-5489.49	0.06885
w*;nompC[3],UAS-LH+LH-NompC::GFP/nompC[3];nompC-GAL4	LH+LH-NOMPC:GFP	-5465.47	0.06883
w*;nompC[3],UAS-LH+LH-NompC::GFP/nompC[3];nompC-GAL4	LH+LH-NOMPC:GFP	-5441.44	0.06881
w*;nompC[3],UAS-LH+LH-NompC::GFP/nompC[3];nompC-GAL4	LH+LH-NOMPC:GFP	-5420.63	0.06879
w*;nompC[3],UAS-LH+LH-NompC::GFP/nompC[3];nompC-GAL4	LH+LH-NOMPC:GFP	-5417.42	0.06878
w*;nompC[3],UAS-LH+LH-NompC::GFP/nompC[3];nompC-GAL4	LH+LH-NOMPC:GFP	-5393.39	0.06876
w*;nompC[3],UAS-LH+LH-NompC::GFP/nompC[3];nompC-GAL4	LH+LH-NOMPC:GFP	-5369.37	0.06874
w*;nompC[3],UAS-LH+LH-NompC::GFP/nompC[3];nompC-GAL4	LH+LH-NOMPC:GFP	-5345.35	0.06871
w*;nompC[3],UAS-LH+LH-NompC::GFP/nompC[3];nompC-GAL4	LH+LH-NOMPC:GFP	-5321.32	0.06869
w*;nompC[3],UAS-LH+LH-NompC::GFP/nompC[3];nompC-GAL4	LH+LH-NOMPC:GFP	-5297.3	0.06867
w*;nompC[3],UAS-LH+LH-NompC::GFP/nompC[3];nompC-GAL4	LH+LH-NOMPC:GFP	-5273.27	0.06864
w*;nompC[3],UAS-LH+LH-NompC::GFP/nompC[3];nompC-GAL4	LH+LH-NOMPC:GFP	-5249.25	0.06862
w*;nompC[3],UAS-LH+LH-NompC::GFP/nompC[3];nompC-GAL4	LH+LH-NOMPC:GFP	-5225.23	0.06859
w*;nompC[3],UAS-LH+LH-NompC::GFP/nompC[3];nompC-GAL4	LH+LH-NOMPC:GFP	-5201.2	0.06857
w*;nompC[3],UAS-LH+LH-NompC::GFP/nompC[3];nompC-GAL4	LH+LH-NOMPC:GFP	-5177.18	0.06854
w*;nompC[3],UAS-LH+LH-NompC::GFP/nompC[3];nompC-GAL4	LH+LH-NOMPC:GFP	-5153.15	0.06851
w*;nompC[3],UAS-LH+LH-NompC::GFP/nompC[3];nompC-GAL4	LH+LH-NOMPC:GFP	-5129.13	0.06849
w*;nompC[3],UAS-LH+LH-NompC::GFP/nompC[3];nompC-GAL4	LH+LH-NOMPC:GFP	-5105.11	0.06846
w*;nompC[3],UAS-LH+LH-NompC::GFP/nompC[3];nompC-GAL4	LH+LH-NOMPC:GFP	-5081.08	0.06843
w*;nompC[3],UAS-LH+LH-NompC::GFP/nompC[3];nompC-GAL4	LH+LH-NOMPC:GFP	-5069.46	0.06842
w*;nompC[3],UAS-LH+LH-NompC::GFP/nompC[3];nompC-GAL4	LH+LH-NOMPC:GFP	-5057.06	0.0684
w*;nompC[3],UAS-LH+LH-NompC::GFP/nompC[3];nompC-GAL4	LH+LH-NOMPC:GFP	-5033.03	0.06837
w*;nompC[3],UAS-LH+LH-NompC::GFP/nompC[3];nompC-GAL4	LH+LH-NOMPC:GFP	-5009.01	0.06834
w*;nompC[3],UAS-LH+LH-NompC::GFP/nompC[3];nompC-GAL4	LH+LH-NOMPC:GFP	-4984.98	0.06831
w*;nompC[3],UAS-LH+LH-NompC::GFP/nompC[3];nompC-GAL4	LH+LH-NOMPC:GFP	-4960.96	0.06828
w*;nompC[3],UAS-LH+LH-NompC::GFP/nompC[3];nompC-GAL4	LH+LH-NOMPC:GFP	-4945.6	0.06826
w*;nompC[3],UAS-LH+LH-NompC::GFP/nompC[3];nompC-GAL4	LH+LH-NOMPC:GFP	-4936.94	0.06825
w*;nompC[3],UAS-LH+LH-NompC::GFP/nompC[3];nompC-GAL4	LH+LH-NOMPC:GFP	-4912.91	0.06822
w*;nompC[3],UAS-LH+LH-NompC::GFP/nompC[3];nompC-GAL4	LH+LH-NOMPC:GFP	-4888.89	0.06819
w*;nompC[3],UAS-LH+LH-NompC::GFP/nompC[3];nompC-GAL4	LH+LH-NOMPC:GFP	-4864.86	0.06816
w*;nompC[3],UAS-LH+LH-NompC::GFP/nompC[3];nompC-GAL4	LH+LH-NOMPC:GFP	-4840.84	0.06812
w*;nompC[3],UAS-LH+LH-NompC::GFP/nompC[3];nompC-GAL4	LH+LH-NOMPC:GFP	-4816.82	0.06809
w*;nompC[3],UAS-LH+LH-NompC::GFP/nompC[3];nompC-GAL4	LH+LH-NOMPC:GFP	-4792.79	0.06805
w*;nompC[3],UAS-LH+LH-NompC::GFP/nompC[3];nompC-GAL4	LH+LH-NOMPC:GFP	-4768.77	0.06802
w*;nompC[3],UAS-LH+LH-NompC::GFP/nompC[3];nompC-GAL4	LH+LH-NOMPC:GFP	-4744.74	0.06798
w*;nompC[3],UAS-LH+LH-NompC::GFP/nompC[3];nompC-GAL4	LH+LH-NOMPC:GFP	-4720.72	0.06795
w*;nompC[3],UAS-LH+LH-NompC::GFP/nompC[3];nompC-GAL4	LH+LH-NOMPC:GFP	-4696.7	0.06791
w*;nompC[3],UAS-LH+LH-NompC::GFP/nompC[3];nompC-GAL4	LH+LH-NOMPC:GFP	-4672.67	0.06787
w*;nompC[3],UAS-LH+LH-NompC::GFP/nompC[3];nompC-GAL4	LH+LH-NOMPC:GFP	-4648.65	0.06783
w*;nompC[3],UAS-LH+LH-NompC::GFP/nompC[3];nompC-GAL4	LH+LH-NOMPC:GFP	-4624.62	0.0678
w*;nompC[3],UAS-LH+LH-NompC::GFP/nompC[3];nompC-GAL4	LH+LH-NOMPC:GFP	-4600.6	0.06776
w*;nompC[3],UAS-LH+LH-NompC::GFP/nompC[3];nompC-GAL4	LH+LH-NOMPC:GFP	-4576.58	0.06772
w*;nompC[3],UAS-LH+LH-NompC::GFP/nompC[3];nompC-GAL4	LH+LH-NOMPC:GFP	-4552.55	0.06767
w*;nompC[3],UAS-LH+LH-NompC::GFP/nompC[3];nompC-GAL4	LH+LH-NOMPC:GFP	-4528.53	0.06763
w*;nompC[3],UAS-LH+LH-NompC::GFP/nompC[3];nompC-GAL4	LH+LH-NOMPC:GFP	-4504.5	0.06759
w*;nompC[3],UAS-LH+LH-NompC::GFP/nompC[3];nompC-GAL4	LH+LH-NOMPC:GFP	-4480.48	0.06755
w*;nompC[3],UAS-LH+LH-NompC::GFP/nompC[3];nompC-GAL4	LH+LH-NOMPC:GFP	-4456.46	0.0675
w*;nompC[3],UAS-LH+LH-NompC::GFP/nompC[3];nompC-GAL4	LH+LH-NOMPC:GFP	-4432.43	0.06746
w*;nompC[3],UAS-LH+LH-NompC::GFP/nompC[3];nompC-GAL4	LH+LH-NOMPC:GFP	-4408.41	0.06741
w*;nompC[3],UAS-LH+LH-NompC::GFP/nompC[3];nompC-GAL4	LH+LH-NOMPC:GFP	-4384.38	0.06737
w*;nompC[3],UAS-LH+LH-NompC::GFP/nompC[3];nompC-GAL4	LH+LH-NOMPC:GFP	-4360.36	0.06732
w*;nompC[3],UAS-LH+LH-NompC::GFP/nompC[3];nompC-GAL4	LH+LH-NOMPC:GFP	-4336.34	0.06728
w*;nompC[3],UAS-LH+LH-NompC::GFP/nompC[3];nompC-GAL4	LH+LH-NOMPC:GFP	-4312.31	0.06723
w*;nompC[3],UAS-LH+LH-NompC::GFP/nompC[3];nompC-GAL4	LH+LH-NOMPC:GFP	-4288.29	0.06718
w*;nompC[3],UAS-LH+LH-NompC::GFP/nompC[3];nompC-GAL4	LH+LH-NOMPC:GFP	-4264.26	0.06713
w*;nompC[3],UAS-LH+LH-NompC::GFP/nompC[3];nompC-GAL4	LH+LH-NOMPC:GFP	-4240.24	0.06708
w*;nompC[3],UAS-LH+LH-NompC::GFP/nompC[3];nompC-GAL4	LH+LH-NOMPC:GFP	-4216.22	0.06703
w*;nompC[3],UAS-LH+LH-NompC::GFP/nompC[3];nompC-GAL4	LH+LH-NOMPC:GFP	-4192.19	0.06697
w*;nompC[3],UAS-LH+LH-NompC::GFP/nompC[3];nompC-GAL4	LH+LH-NOMPC:GFP	-4168.17	0.06692
w*;nompC[3],UAS-LH+LH-NompC::GFP/nompC[3];nompC-GAL4	LH+LH-NOMPC:GFP	-4144.14	0.06687
w*;nompC[3],UAS-LH+LH-NompC::GFP/nompC[3];nompC-GAL4	LH+LH-NOMPC:GFP	-4120.12	0.06681
w*;nompC[3],UAS-LH+LH-NompC::GFP/nompC[3];nompC-GAL4	LH+LH-NOMPC:GFP	-4096.1	0.06676
w*;nompC[3],UAS-LH+LH-NompC::GFP/nompC[3];nompC-GAL4	LH+LH-NOMPC:GFP	-4072.07	0.0667
w*;nompC[3],UAS-LH+LH-NompC::GFP/nompC[3];nompC-GAL4	LH+LH-NOMPC:GFP	-4048.05	0.06664
w*;nompC[3],UAS-LH+LH-NompC::GFP/nompC[3];nompC-GAL4	LH+LH-NOMPC:GFP	-4024.02	0.06658
w*;nompC[3],UAS-LH+LH-NompC::GFP/nompC[3];nompC-GAL4	LH+LH-NOMPC:GFP	-4000	0.06653
w*;nompC[3],UAS-LH+LH-NompC::GFP/nompC[3];nompC-GAL4	LH+LH-NOMPC:GFP	-3975.98	0.06647
w*;nompC[3],UAS-LH+LH-NompC::GFP/nompC[3];nompC-GAL4	LH+LH-NOMPC:GFP	-3951.95	0.0664
w*;nompC[3],UAS-LH+LH-NompC::GFP/nompC[3];nompC-GAL4	LH+LH-NOMPC:GFP	-3927.93	0.06634
w*;nompC[3],UAS-LH+LH-NompC::GFP/nompC[3];nompC-GAL4	LH+LH-NOMPC:GFP	-3903.9	0.06628
w*;nompC[3],UAS-LH+LH-NompC::GFP/nompC[3];nompC-GAL4	LH+LH-NOMPC:GFP	-3879.88	0.06622
w*;nompC[3],UAS-LH+LH-NompC::GFP/nompC[3];nompC-GAL4	LH+LH-NOMPC:GFP	-3855.86	0.06615
w*;nompC[3],UAS-LH+LH-NompC::GFP/nompC[3];nompC-GAL4	LH+LH-NOMPC:GFP	-3831.83	0.06608
w*;nompC[3],UAS-LH+LH-NompC::GFP/nompC[3];nompC-GAL4	LH+LH-NOMPC:GFP	-3807.81	0.06602
w*;nompC[3],UAS-LH+LH-NompC::GFP/nompC[3];nompC-GAL4	LH+LH-NOMPC:GFP	-3783.78	0.06595
w*;nompC[3],UAS-LH+LH-NompC::GFP/nompC[3];nompC-GAL4	LH+LH-NOMPC:GFP	-3759.76	0.06588
w*;nompC[3],UAS-LH+LH-NompC::GFP/nompC[3];nompC-GAL4	LH+LH-NOMPC:GFP	-3735.74	0.06581
w*;nompC[3],UAS-LH+LH-NompC::GFP/nompC[3];nompC-GAL4	LH+LH-NOMPC:GFP	-3711.71	0.06574
w*;nompC[3],UAS-LH+LH-NompC::GFP/nompC[3];nompC-GAL4	LH+LH-NOMPC:GFP	-3687.69	0.06567
w*;nompC[3],UAS-LH+LH-NompC::GFP/nompC[3];nompC-GAL4	LH+LH-NOMPC:GFP	-3663.66	0.06559
w*;nompC[3],UAS-LH+LH-NompC::GFP/nompC[3];nompC-GAL4	LH+LH-NOMPC:GFP	-3639.64	0.06552
w*;nompC[3],UAS-LH+LH-NompC::GFP/nompC[3];nompC-GAL4	LH+LH-NOMPC:GFP	-3615.62	0.06545
w*;nompC[3],UAS-LH+LH-NompC::GFP/nompC[3];nompC-GAL4	LH+LH-NOMPC:GFP	-3591.59	0.06537
w*;nompC[3],UAS-LH+LH-NompC::GFP/nompC[3];nompC-GAL4	LH+LH-NOMPC:GFP	-3567.57	0.06529
w*;nompC[3],UAS-LH+LH-NompC::GFP/nompC[3];nompC-GAL4	LH+LH-NOMPC:GFP	-3543.54	0.06521
w*;nompC[3],UAS-LH+LH-NompC::GFP/nompC[3];nompC-GAL4	LH+LH-NOMPC:GFP	-3519.52	0.06513
w*;nompC[3],UAS-LH+LH-NompC::GFP/nompC[3];nompC-GAL4	LH+LH-NOMPC:GFP	-3495.5	0.06505
w*;nompC[3],UAS-LH+LH-NompC::GFP/nompC[3];nompC-GAL4	LH+LH-NOMPC:GFP	-3471.47	0.06497
w*;nompC[3],UAS-LH+LH-NompC::GFP/nompC[3];nompC-GAL4	LH+LH-NOMPC:GFP	-3457.59	0.06492
w*;nompC[3],UAS-LH+LH-NompC::GFP/nompC[3];nompC-GAL4	LH+LH-NOMPC:GFP	-3447.45	0.06489
w*;nompC[3],UAS-LH+LH-NompC::GFP/nompC[3];nompC-GAL4	LH+LH-NOMPC:GFP	-3423.42	0.0648
w*;nompC[3],UAS-LH+LH-NompC::GFP/nompC[3];nompC-GAL4	LH+LH-NOMPC:GFP	-3403.68	0.06473
w*;nompC[3],UAS-LH+LH-NompC::GFP/nompC[3];nompC-GAL4	LH+LH-NOMPC:GFP	-3399.4	0.06472
w*;nompC[3],UAS-LH+LH-NompC::GFP/nompC[3];nompC-GAL4	LH+LH-NOMPC:GFP	-3375.38	0.06463
w*;nompC[3],UAS-LH+LH-NompC::GFP/nompC[3];nompC-GAL4	LH+LH-NOMPC:GFP	-3351.35	0.06454
w*;nompC[3],UAS-LH+LH-NompC::GFP/nompC[3];nompC-GAL4	LH+LH-NOMPC:GFP	-3327.33	0.06445
w*;nompC[3],UAS-LH+LH-NompC::GFP/nompC[3];nompC-GAL4	LH+LH-NOMPC:GFP	-3303.3	0.06436
w*;nompC[3],UAS-LH+LH-NompC::GFP/nompC[3];nompC-GAL4	LH+LH-NOMPC:GFP	-3279.28	0.06427
w*;nompC[3],UAS-LH+LH-NompC::GFP/nompC[3];nompC-GAL4	LH+LH-NOMPC:GFP	-3255.26	0.06418
w*;nompC[3],UAS-LH+LH-NompC::GFP/nompC[3];nompC-GAL4	LH+LH-NOMPC:GFP	-3231.23	0.06408
w*;nompC[3],UAS-LH+LH-NompC::GFP/nompC[3];nompC-GAL4	LH+LH-NOMPC:GFP	-3207.21	0.06399
w*;nompC[3],UAS-LH+LH-NompC::GFP/nompC[3];nompC-GAL4	LH+LH-NOMPC:GFP	-3183.18	0.06389
w*;nompC[3],UAS-LH+LH-NompC::GFP/nompC[3];nompC-GAL4	LH+LH-NOMPC:GFP	-3159.16	0.0638
w*;nompC[3],UAS-LH+LH-NompC::GFP/nompC[3];nompC-GAL4	LH+LH-NOMPC:GFP	-3153.51	0.06377
w*;nompC[3],UAS-LH+LH-NompC::GFP/nompC[3];nompC-GAL4	LH+LH-NOMPC:GFP	-3135.14	0.0637
w*;nompC[3],UAS-LH+LH-NompC::GFP/nompC[3];nompC-GAL4	LH+LH-NOMPC:GFP	-3111.11	0.0636
w*;nompC[3],UAS-LH+LH-NompC::GFP/nompC[3];nompC-GAL4	LH+LH-NOMPC:GFP	-3087.09	0.06349
w*;nompC[3],UAS-LH+LH-NompC::GFP/nompC[3];nompC-GAL4	LH+LH-NOMPC:GFP	-3063.06	0.06339
w*;nompC[3],UAS-LH+LH-NompC::GFP/nompC[3];nompC-GAL4	LH+LH-NOMPC:GFP	-3039.04	0.06329
w*;nompC[3],UAS-LH+LH-NompC::GFP/nompC[3];nompC-GAL4	LH+LH-NOMPC:GFP	-3015.02	0.06318
w*;nompC[3],UAS-LH+LH-NompC::GFP/nompC[3];nompC-GAL4	LH+LH-NOMPC:GFP	-2990.99	0.06308
w*;nompC[3],UAS-LH+LH-NompC::GFP/nompC[3];nompC-GAL4	LH+LH-NOMPC:GFP	-2966.97	0.06297
w*;nompC[3],UAS-LH+LH-NompC::GFP/nompC[3];nompC-GAL4	LH+LH-NOMPC:GFP	-2951.87	0.0629
w*;nompC[3],UAS-LH+LH-NompC::GFP/nompC[3];nompC-GAL4	LH+LH-NOMPC:GFP	-2942.94	0.06286
w*;nompC[3],UAS-LH+LH-NompC::GFP/nompC[3];nompC-GAL4	LH+LH-NOMPC:GFP	-2918.92	0.06275
w*;nompC[3],UAS-LH+LH-NompC::GFP/nompC[3];nompC-GAL4	LH+LH-NOMPC:GFP	-2907.44	0.0627
w*;nompC[3],UAS-LH+LH-NompC::GFP/nompC[3];nompC-GAL4	LH+LH-NOMPC:GFP	-2894.89	0.06264
w*;nompC[3],UAS-LH+LH-NompC::GFP/nompC[3];nompC-GAL4	LH+LH-NOMPC:GFP	-2870.87	0.06252
w*;nompC[3],UAS-LH+LH-NompC::GFP/nompC[3];nompC-GAL4	LH+LH-NOMPC:GFP	-2846.85	0.06241
w*;nompC[3],UAS-LH+LH-NompC::GFP/nompC[3];nompC-GAL4	LH+LH-NOMPC:GFP	-2822.82	0.06229
w*;nompC[3],UAS-LH+LH-NompC::GFP/nompC[3];nompC-GAL4	LH+LH-NOMPC:GFP	-2798.8	0.06218
w*;nompC[3],UAS-LH+LH-NompC::GFP/nompC[3];nompC-GAL4	LH+LH-NOMPC:GFP	-2774.77	0.06206
w*;nompC[3],UAS-LH+LH-NompC::GFP/nompC[3];nompC-GAL4	LH+LH-NOMPC:GFP	-2750.75	0.06194
w*;nompC[3],UAS-LH+LH-NompC::GFP/nompC[3];nompC-GAL4	LH+LH-NOMPC:GFP	-2726.73	0.06182
w*;nompC[3],UAS-LH+LH-NompC::GFP/nompC[3];nompC-GAL4	LH+LH-NOMPC:GFP	-2702.7	0.0617
w*;nompC[3],UAS-LH+LH-NompC::GFP/nompC[3];nompC-GAL4	LH+LH-NOMPC:GFP	-2678.68	0.06157
w*;nompC[3],UAS-LH+LH-NompC::GFP/nompC[3];nompC-GAL4	LH+LH-NOMPC:GFP	-2654.65	0.06145
w*;nompC[3],UAS-LH+LH-NompC::GFP/nompC[3];nompC-GAL4	LH+LH-NOMPC:GFP	-2630.63	0.06132
w*;nompC[3],UAS-LH+LH-NompC::GFP/nompC[3];nompC-GAL4	LH+LH-NOMPC:GFP	-2606.61	0.0612
w*;nompC[3],UAS-LH+LH-NompC::GFP/nompC[3];nompC-GAL4	LH+LH-NOMPC:GFP	-2586.94	0.06109
w*;nompC[3],UAS-LH+LH-NompC::GFP/nompC[3];nompC-GAL4	LH+LH-NOMPC:GFP	-2582.58	0.06107
w*;nompC[3],UAS-LH+LH-NompC::GFP/nompC[3];nompC-GAL4	LH+LH-NOMPC:GFP	-2558.56	0.06094
w*;nompC[3],UAS-LH+LH-NompC::GFP/nompC[3];nompC-GAL4	LH+LH-NOMPC:GFP	-2534.53	0.06081
w*;nompC[3],UAS-LH+LH-NompC::GFP/nompC[3];nompC-GAL4	LH+LH-NOMPC:GFP	-2524.91	0.06076
w*;nompC[3],UAS-LH+LH-NompC::GFP/nompC[3];nompC-GAL4	LH+LH-NOMPC:GFP	-2510.51	0.06068
w*;nompC[3],UAS-LH+LH-NompC::GFP/nompC[3];nompC-GAL4	LH+LH-NOMPC:GFP	-2486.49	0.06054
w*;nompC[3],UAS-LH+LH-NompC::GFP/nompC[3];nompC-GAL4	LH+LH-NOMPC:GFP	-2462.46	0.06041
w*;nompC[3],UAS-LH+LH-NompC::GFP/nompC[3];nompC-GAL4	LH+LH-NOMPC:GFP	-2438.44	0.06027
w*;nompC[3],UAS-LH+LH-NompC::GFP/nompC[3];nompC-GAL4	LH+LH-NOMPC:GFP	-2414.41	0.06014
w*;nompC[3],UAS-LH+LH-NompC::GFP/nompC[3];nompC-GAL4	LH+LH-NOMPC:GFP	-2390.39	0.06
w*;nompC[3],UAS-LH+LH-NompC::GFP/nompC[3];nompC-GAL4	LH+LH-NOMPC:GFP	-2366.37	0.05986
w*;nompC[3],UAS-LH+LH-NompC::GFP/nompC[3];nompC-GAL4	LH+LH-NOMPC:GFP	-2347.82	0.05975
w*;nompC[3],UAS-LH+LH-NompC::GFP/nompC[3];nompC-GAL4	LH+LH-NOMPC:GFP	-2342.34	0.05972
w*;nompC[3],UAS-LH+LH-NompC::GFP/nompC[3];nompC-GAL4	LH+LH-NOMPC:GFP	-2318.32	0.05958
w*;nompC[3],UAS-LH+LH-NompC::GFP/nompC[3];nompC-GAL4	LH+LH-NOMPC:GFP	-2294.29	0.05944
w*;nompC[3],UAS-LH+LH-NompC::GFP/nompC[3];nompC-GAL4	LH+LH-NOMPC:GFP	-2270.27	0.05929
w*;nompC[3],UAS-LH+LH-NompC::GFP/nompC[3];nompC-GAL4	LH+LH-NOMPC:GFP	-2246.25	0.05915
w*;nompC[3],UAS-LH+LH-NompC::GFP/nompC[3];nompC-GAL4	LH+LH-NOMPC:GFP	-2222.22	0.059
w*;nompC[3],UAS-LH+LH-NompC::GFP/nompC[3];nompC-GAL4	LH+LH-NOMPC:GFP	-2208.34	0.05892
w*;nompC[3],UAS-LH+LH-NompC::GFP/nompC[3];nompC-GAL4	LH+LH-NOMPC:GFP	-2198.2	0.05885
w*;nompC[3],UAS-LH+LH-NompC::GFP/nompC[3];nompC-GAL4	LH+LH-NOMPC:GFP	-2174.17	0.05871
w*;nompC[3],UAS-LH+LH-NompC::GFP/nompC[3];nompC-GAL4	LH+LH-NOMPC:GFP	-2167.94	0.05867
w*;nompC[3],UAS-LH+LH-NompC::GFP/nompC[3];nompC-GAL4	LH+LH-NOMPC:GFP	-2150.15	0.05856
w*;nompC[3],UAS-LH+LH-NompC::GFP/nompC[3];nompC-GAL4	LH+LH-NOMPC:GFP	-2126.13	0.05841
w*;nompC[3],UAS-LH+LH-NompC::GFP/nompC[3];nompC-GAL4	LH+LH-NOMPC:GFP	-2106.32	0.05828
w*;nompC[3],UAS-LH+LH-NompC::GFP/nompC[3];nompC-GAL4	LH+LH-NOMPC:GFP	-2102.1	0.05826
w*;nompC[3],UAS-LH+LH-NompC::GFP/nompC[3];nompC-GAL4	LH+LH-NOMPC:GFP	-2078.08	0.0581
w*;nompC[3],UAS-LH+LH-NompC::GFP/nompC[3];nompC-GAL4	LH+LH-NOMPC:GFP	-2059.51	0.05798
w*;nompC[3],UAS-LH+LH-NompC::GFP/nompC[3];nompC-GAL4	LH+LH-NOMPC:GFP	-2054.05	0.05795
w*;nompC[3],UAS-LH+LH-NompC::GFP/nompC[3];nompC-GAL4	LH+LH-NOMPC:GFP	-2030.03	0.0578
w*;nompC[3],UAS-LH+LH-NompC::GFP/nompC[3];nompC-GAL4	LH+LH-NOMPC:GFP	-2006.01	0.05764
w*;nompC[3],UAS-LH+LH-NompC::GFP/nompC[3];nompC-GAL4	LH+LH-NOMPC:GFP	-1981.98	0.05749
w*;nompC[3],UAS-LH+LH-NompC::GFP/nompC[3];nompC-GAL4	LH+LH-NOMPC:GFP	-1957.96	0.05733
w*;nompC[3],UAS-LH+LH-NompC::GFP/nompC[3];nompC-GAL4	LH+LH-NOMPC:GFP	-1933.93	0.05717
w*;nompC[3],UAS-LH+LH-NompC::GFP/nompC[3];nompC-GAL4	LH+LH-NOMPC:GFP	-1915.59	0.05705
w*;nompC[3],UAS-LH+LH-NompC::GFP/nompC[3];nompC-GAL4	LH+LH-NOMPC:GFP	-1909.91	0.05701
w*;nompC[3],UAS-LH+LH-NompC::GFP/nompC[3];nompC-GAL4	LH+LH-NOMPC:GFP	-1885.89	0.05685
w*;nompC[3],UAS-LH+LH-NompC::GFP/nompC[3];nompC-GAL4	LH+LH-NOMPC:GFP	-1861.86	0.05669
w*;nompC[3],UAS-LH+LH-NompC::GFP/nompC[3];nompC-GAL4	LH+LH-NOMPC:GFP	-1837.84	0.05653
w*;nompC[3],UAS-LH+LH-NompC::GFP/nompC[3];nompC-GAL4	LH+LH-NOMPC:GFP	-1813.81	0.05637
w*;nompC[3],UAS-LH+LH-NompC::GFP/nompC[3];nompC-GAL4	LH+LH-NOMPC:GFP	-1809.77	0.05634
w*;nompC[3],UAS-LH+LH-NompC::GFP/nompC[3];nompC-GAL4	LH+LH-NOMPC:GFP	-1789.79	0.05621
w*;nompC[3],UAS-LH+LH-NompC::GFP/nompC[3];nompC-GAL4	LH+LH-NOMPC:GFP	-1769.58	0.05607
w*;nompC[3],UAS-LH+LH-NompC::GFP/nompC[3];nompC-GAL4	LH+LH-NOMPC:GFP	-1765.77	0.05604
w*;nompC[3],UAS-LH+LH-NompC::GFP/nompC[3];nompC-GAL4	LH+LH-NOMPC:GFP	-1741.74	0.05588
w*;nompC[3],UAS-LH+LH-NompC::GFP/nompC[3];nompC-GAL4	LH+LH-NOMPC:GFP	-1717.72	0.05572
w*;nompC[3],UAS-LH+LH-NompC::GFP/nompC[3];nompC-GAL4	LH+LH-NOMPC:GFP	-1693.69	0.05555
w*;nompC[3],UAS-LH+LH-NompC::GFP/nompC[3];nompC-GAL4	LH+LH-NOMPC:GFP	-1669.67	0.05538
w*;nompC[3],UAS-LH+LH-NompC::GFP/nompC[3];nompC-GAL4	LH+LH-NOMPC:GFP	-1645.65	0.05522
w*;nompC[3],UAS-LH+LH-NompC::GFP/nompC[3];nompC-GAL4	LH+LH-NOMPC:GFP	-1631.61	0.05512
w*;nompC[3],UAS-LH+LH-NompC::GFP/nompC[3];nompC-GAL4	LH+LH-NOMPC:GFP	-1621.62	0.05505
w*;nompC[3],UAS-LH+LH-NompC::GFP/nompC[3];nompC-GAL4	LH+LH-NOMPC:GFP	-1597.6	0.05488
w*;nompC[3],UAS-LH+LH-NompC::GFP/nompC[3];nompC-GAL4	LH+LH-NOMPC:GFP	-1578.59	0.05475
w*;nompC[3],UAS-LH+LH-NompC::GFP/nompC[3];nompC-GAL4	LH+LH-NOMPC:GFP	-1573.57	0.05471
w*;nompC[3],UAS-LH+LH-NompC::GFP/nompC[3];nompC-GAL4	LH+LH-NOMPC:GFP	-1549.55	0.05454
w*;nompC[3],UAS-LH+LH-NompC::GFP/nompC[3];nompC-GAL4	LH+LH-NOMPC:GFP	-1525.53	0.05437
w*;nompC[3],UAS-LH+LH-NompC::GFP/nompC[3];nompC-GAL4	LH+LH-NOMPC:GFP	-1501.5	0.0542
w*;nompC[3],UAS-LH+LH-NompC::GFP/nompC[3];nompC-GAL4	LH+LH-NOMPC:GFP	-1477.48	0.05403
w*;nompC[3],UAS-LH+LH-NompC::GFP/nompC[3];nompC-GAL4	LH+LH-NOMPC:GFP	-1474.31	0.05401
w*;nompC[3],UAS-LH+LH-NompC::GFP/nompC[3];nompC-GAL4	LH+LH-NOMPC:GFP	-1453.45	0.05386
w*;nompC[3],UAS-LH+LH-NompC::GFP/nompC[3];nompC-GAL4	LH+LH-NOMPC:GFP	-1429.43	0.05369
w*;nompC[3],UAS-LH+LH-NompC::GFP/nompC[3];nompC-GAL4	LH+LH-NOMPC:GFP	-1405.41	0.05352
w*;nompC[3],UAS-LH+LH-NompC::GFP/nompC[3];nompC-GAL4	LH+LH-NOMPC:GFP	-1392.3	0.05342
w*;nompC[3],UAS-LH+LH-NompC::GFP/nompC[3];nompC-GAL4	LH+LH-NOMPC:GFP	-1381.38	0.05334
w*;nompC[3],UAS-LH+LH-NompC::GFP/nompC[3];nompC-GAL4	LH+LH-NOMPC:GFP	-1362.24	0.0532
w*;nompC[3],UAS-LH+LH-NompC::GFP/nompC[3];nompC-GAL4	LH+LH-NOMPC:GFP	-1357.36	0.05317
w*;nompC[3],UAS-LH+LH-NompC::GFP/nompC[3];nompC-GAL4	LH+LH-NOMPC:GFP	-1333.33	0.05299
w*;nompC[3],UAS-LH+LH-NompC::GFP/nompC[3];nompC-GAL4	LH+LH-NOMPC:GFP	-1309.31	0.05282
w*;nompC[3],UAS-LH+LH-NompC::GFP/nompC[3];nompC-GAL4	LH+LH-NOMPC:GFP	-1285.29	0.05264
w*;nompC[3],UAS-LH+LH-NompC::GFP/nompC[3];nompC-GAL4	LH+LH-NOMPC:GFP	-1261.26	0.05247
w*;nompC[3],UAS-LH+LH-NompC::GFP/nompC[3];nompC-GAL4	LH+LH-NOMPC:GFP	-1237.24	0.05229
w*;nompC[3],UAS-LH+LH-NompC::GFP/nompC[3];nompC-GAL4	LH+LH-NOMPC:GFP	-1213.21	0.05211
w*;nompC[3],UAS-LH+LH-NompC::GFP/nompC[3];nompC-GAL4	LH+LH-NOMPC:GFP	-1189.19	0.05193
w*;nompC[3],UAS-LH+LH-NompC::GFP/nompC[3];nompC-GAL4	LH+LH-NOMPC:GFP	-1165.17	0.05175
w*;nompC[3],UAS-LH+LH-NompC::GFP/nompC[3];nompC-GAL4	LH+LH-NOMPC:GFP	-1145.97	0.05161
w*;nompC[3],UAS-LH+LH-NompC::GFP/nompC[3];nompC-GAL4	LH+LH-NOMPC:GFP	-1141.14	0.05157
w*;nompC[3],UAS-LH+LH-NompC::GFP/nompC[3];nompC-GAL4	LH+LH-NOMPC:GFP	-1117.12	0.05139
w*;nompC[3],UAS-LH+LH-NompC::GFP/nompC[3];nompC-GAL4	LH+LH-NOMPC:GFP	-1093.09	0.05121
w*;nompC[3],UAS-LH+LH-NompC::GFP/nompC[3];nompC-GAL4	LH+LH-NOMPC:GFP	-1086.52	0.05116
w*;nompC[3],UAS-LH+LH-NompC::GFP/nompC[3];nompC-GAL4	LH+LH-NOMPC:GFP	-1069.07	0.05103
w*;nompC[3],UAS-LH+LH-NompC::GFP/nompC[3];nompC-GAL4	LH+LH-NOMPC:GFP	-1045.05	0.05085
w*;nompC[3],UAS-LH+LH-NompC::GFP/nompC[3];nompC-GAL4	LH+LH-NOMPC:GFP	-1024.48	0.05069
w*;nompC[3],UAS-LH+LH-NompC::GFP/nompC[3];nompC-GAL4	LH+LH-NOMPC:GFP	-1021.02	0.05067
w*;nompC[3],UAS-LH+LH-NompC::GFP/nompC[3];nompC-GAL4	LH+LH-NOMPC:GFP	-996.997	0.05048
w*;nompC[3],UAS-LH+LH-NompC::GFP/nompC[3];nompC-GAL4	LH+LH-NOMPC:GFP	-972.973	0.0503
w*;nompC[3],UAS-LH+LH-NompC::GFP/nompC[3];nompC-GAL4	LH+LH-NOMPC:GFP	-963.905	0.05023
w*;nompC[3],UAS-LH+LH-NompC::GFP/nompC[3];nompC-GAL4	LH+LH-NOMPC:GFP	-948.949	0.05011
w*;nompC[3],UAS-LH+LH-NompC::GFP/nompC[3];nompC-GAL4	LH+LH-NOMPC:GFP	-942.741	0.05007
w*;nompC[3],UAS-LH+LH-NompC::GFP/nompC[3];nompC-GAL4	LH+LH-NOMPC:GFP	-924.925	0.04993
w*;nompC[3],UAS-LH+LH-NompC::GFP/nompC[3];nompC-GAL4	LH+LH-NOMPC:GFP	-900.901	0.04974
w*;nompC[3],UAS-LH+LH-NompC::GFP/nompC[3];nompC-GAL4	LH+LH-NOMPC:GFP	-876.877	0.04955
w*;nompC[3],UAS-LH+LH-NompC::GFP/nompC[3];nompC-GAL4	LH+LH-NOMPC:GFP	-852.853	0.04937
w*;nompC[3],UAS-LH+LH-NompC::GFP/nompC[3];nompC-GAL4	LH+LH-NOMPC:GFP	-828.829	0.04918
w*;nompC[3],UAS-LH+LH-NompC::GFP/nompC[3];nompC-GAL4	LH+LH-NOMPC:GFP	-804.805	0.04899
w*;nompC[3],UAS-LH+LH-NompC::GFP/nompC[3];nompC-GAL4	LH+LH-NOMPC:GFP	-780.781	0.0488
w*;nompC[3],UAS-LH+LH-NompC::GFP/nompC[3];nompC-GAL4	LH+LH-NOMPC:GFP	-756.757	0.04861
w*;nompC[3],UAS-LH+LH-NompC::GFP/nompC[3];nompC-GAL4	LH+LH-NOMPC:GFP	-732.733	0.04842
w*;nompC[3],UAS-LH+LH-NompC::GFP/nompC[3];nompC-GAL4	LH+LH-NOMPC:GFP	-708.709	0.04824
w*;nompC[3],UAS-LH+LH-NompC::GFP/nompC[3];nompC-GAL4	LH+LH-NOMPC:GFP	-684.685	0.04805
w*;nompC[3],UAS-LH+LH-NompC::GFP/nompC[3];nompC-GAL4	LH+LH-NOMPC:GFP	-660.661	0.04786
w*;nompC[3],UAS-LH+LH-NompC::GFP/nompC[3];nompC-GAL4	LH+LH-NOMPC:GFP	-650.465	0.04778
w*;nompC[3],UAS-LH+LH-NompC::GFP/nompC[3];nompC-GAL4	LH+LH-NOMPC:GFP	-636.637	0.04767
w*;nompC[3],UAS-LH+LH-NompC::GFP/nompC[3];nompC-GAL4	LH+LH-NOMPC:GFP	-612.613	0.04749
w*;nompC[3],UAS-LH+LH-NompC::GFP/nompC[3];nompC-GAL4	LH+LH-NOMPC:GFP	-588.589	0.0473
w*;nompC[3],UAS-LH+LH-NompC::GFP/nompC[3];nompC-GAL4	LH+LH-NOMPC:GFP	-581.167	0.04724
w*;nompC[3],UAS-LH+LH-NompC::GFP/nompC[3];nompC-GAL4	LH+LH-NOMPC:GFP	-566.405	0.04713
w*;nompC[3],UAS-LH+LH-NompC::GFP/nompC[3];nompC-GAL4	LH+LH-NOMPC:GFP	-564.565	0.04712
w*;nompC[3],UAS-LH+LH-NompC::GFP/nompC[3];nompC-GAL4	LH+LH-NOMPC:GFP	-540.541	0.04693
w*;nompC[3],UAS-LH+LH-NompC::GFP/nompC[3];nompC-GAL4	LH+LH-NOMPC:GFP	-531.198	0.04686
w*;nompC[3],UAS-LH+LH-NompC::GFP/nompC[3];nompC-GAL4	LH+LH-NOMPC:GFP	-516.517	0.04676
w*;nompC[3],UAS-LH+LH-NompC::GFP/nompC[3];nompC-GAL4	LH+LH-NOMPC:GFP	-506.379	0.04668
w*;nompC[3],UAS-LH+LH-NompC::GFP/nompC[3];nompC-GAL4	LH+LH-NOMPC:GFP	-492.492	0.04658
w*;nompC[3],UAS-LH+LH-NompC::GFP/nompC[3];nompC-GAL4	LH+LH-NOMPC:GFP	-468.468	0.04641
w*;nompC[3],UAS-LH+LH-NompC::GFP/nompC[3];nompC-GAL4	LH+LH-NOMPC:GFP	-444.444	0.04624
w*;nompC[3],UAS-LH+LH-NompC::GFP/nompC[3];nompC-GAL4	LH+LH-NOMPC:GFP	-420.42	0.04607
w*;nompC[3],UAS-LH+LH-NompC::GFP/nompC[3];nompC-GAL4	LH+LH-NOMPC:GFP	-396.396	0.04591
w*;nompC[3],UAS-LH+LH-NompC::GFP/nompC[3];nompC-GAL4	LH+LH-NOMPC:GFP	-372.372	0.04576
w*;nompC[3],UAS-LH+LH-NompC::GFP/nompC[3];nompC-GAL4	LH+LH-NOMPC:GFP	-348.348	0.04561
w*;nompC[3],UAS-LH+LH-NompC::GFP/nompC[3];nompC-GAL4	LH+LH-NOMPC:GFP	-324.324	0.04546
w*;nompC[3],UAS-LH+LH-NompC::GFP/nompC[3];nompC-GAL4	LH+LH-NOMPC:GFP	-311.115	0.04539
w*;nompC[3],UAS-LH+LH-NompC::GFP/nompC[3];nompC-GAL4	LH+LH-NOMPC:GFP	-300.3	0.04533
w*;nompC[3],UAS-LH+LH-NompC::GFP/nompC[3];nompC-GAL4	LH+LH-NOMPC:GFP	-276.276	0.0452
w*;nompC[3],UAS-LH+LH-NompC::GFP/nompC[3];nompC-GAL4	LH+LH-NOMPC:GFP	-252.252	0.04508
w*;nompC[3],UAS-LH+LH-NompC::GFP/nompC[3];nompC-GAL4	LH+LH-NOMPC:GFP	-251.761	0.04508
w*;nompC[3],UAS-LH+LH-NompC::GFP/nompC[3];nompC-GAL4	LH+LH-NOMPC:GFP	-235.887	0.045
w*;nompC[3],UAS-LH+LH-NompC::GFP/nompC[3];nompC-GAL4	LH+LH-NOMPC:GFP	-234.4	0.04499
w*;nompC[3],UAS-LH+LH-NompC::GFP/nompC[3];nompC-GAL4	LH+LH-NOMPC:GFP	-228.228	0.04497
w*;nompC[3],UAS-LH+LH-NompC::GFP/nompC[3];nompC-GAL4	LH+LH-NOMPC:GFP	-206.208	0.04487
w*;nompC[3],UAS-LH+LH-NompC::GFP/nompC[3];nompC-GAL4	LH+LH-NOMPC:GFP	-204.204	0.04487
w*;nompC[3],UAS-LH+LH-NompC::GFP/nompC[3];nompC-GAL4	LH+LH-NOMPC:GFP	-180.18	0.04477
w*;nompC[3],UAS-LH+LH-NompC::GFP/nompC[3];nompC-GAL4	LH+LH-NOMPC:GFP	-172.463	0.04475
w*;nompC[3],UAS-LH+LH-NompC::GFP/nompC[3];nompC-GAL4	LH+LH-NOMPC:GFP	-156.156	0.04469
w*;nompC[3],UAS-LH+LH-NompC::GFP/nompC[3];nompC-GAL4	LH+LH-NOMPC:GFP	-132.132	0.04462
w*;nompC[3],UAS-LH+LH-NompC::GFP/nompC[3];nompC-GAL4	LH+LH-NOMPC:GFP	-126.421	0.04461
w*;nompC[3],UAS-LH+LH-NompC::GFP/nompC[3];nompC-GAL4	LH+LH-NOMPC:GFP	-116.537	0.04458
w*;nompC[3],UAS-LH+LH-NompC::GFP/nompC[3];nompC-GAL4	LH+LH-NOMPC:GFP	-108.108	0.04456
w*;nompC[3],UAS-LH+LH-NompC::GFP/nompC[3];nompC-GAL4	LH+LH-NOMPC:GFP	-102.917	0.04455
w*;nompC[3],UAS-LH+LH-NompC::GFP/nompC[3];nompC-GAL4	LH+LH-NOMPC:GFP	-99.8185	0.04454
w*;nompC[3],UAS-LH+LH-NompC::GFP/nompC[3];nompC-GAL4	LH+LH-NOMPC:GFP	-89.3173	0.04452
w*;nompC[3],UAS-LH+LH-NompC::GFP/nompC[3];nompC-GAL4	LH+LH-NOMPC:GFP	-84.0841	0.04451
w*;nompC[3],UAS-LH+LH-NompC::GFP/nompC[3];nompC-GAL4	LH+LH-NOMPC:GFP	-63.3968	0.04448
w*;nompC[3],UAS-LH+LH-NompC::GFP/nompC[3];nompC-GAL4	LH+LH-NOMPC:GFP	-61.497	0.04448
w*;nompC[3],UAS-LH+LH-NompC::GFP/nompC[3];nompC-GAL4	LH+LH-NOMPC:GFP	-60.0601	0.04448
w*;nompC[3],UAS-LH+LH-NompC::GFP/nompC[3];nompC-GAL4	LH+LH-NOMPC:GFP	-58.7155	0.04447
w*;nompC[3],UAS-LH+LH-NompC::GFP/nompC[3];nompC-GAL4	LH+LH-NOMPC:GFP	-36.7904	0.04445
w*;nompC[3],UAS-LH+LH-NompC::GFP/nompC[3];nompC-GAL4	LH+LH-NOMPC:GFP	-36.036	0.04445
w*;nompC[3],UAS-LH+LH-NompC::GFP/nompC[3];nompC-GAL4	LH+LH-NOMPC:GFP	-31.9352	0.04445
w*;nompC[3],UAS-LH+LH-NompC::GFP/nompC[3];nompC-GAL4	LH+LH-NOMPC:GFP	-31.2768	0.04445
w*;nompC[3],UAS-LH+LH-NompC::GFP/nompC[3];nompC-GAL4	LH+LH-NOMPC:GFP	-29.4394	0.04445
w*;nompC[3],UAS-LH+LH-NompC::GFP/nompC[3];nompC-GAL4	LH+LH-NOMPC:GFP	-26.982	0.04445
w*;nompC[3],UAS-LH+LH-NompC::GFP/nompC[3];nompC-GAL4	LH+LH-NOMPC:GFP	-12.012	0.04444
w*;nompC[3],UAS-LH+LH-NompC::GFP/nompC[3];nompC-GAL4	LH+LH-NOMPC:GFP	-4.46259	0.04444
w*;nompC[3],UAS-LH+LH-NompC::GFP/nompC[3];nompC-GAL4	LH+LH-NOMPC:GFP	0.07536	0.04444
w*;nompC[3],UAS-LH+LH-NompC::GFP/nompC[3];nompC-GAL4	LH+LH-NOMPC:GFP	0.41683	0.04444
w*;nompC[3],UAS-LH+LH-NompC::GFP/nompC[3];nompC-GAL4	LH+LH-NOMPC:GFP	4.64465	0.04444
w*;nompC[3],UAS-LH+LH-NompC::GFP/nompC[3];nompC-GAL4	LH+LH-NOMPC:GFP	12.012	0.04444
w*;nompC[3],UAS-LH+LH-NompC::GFP/nompC[3];nompC-GAL4	LH+LH-NOMPC:GFP	17.3744	0.04444
w*;nompC[3],UAS-LH+LH-NompC::GFP/nompC[3];nompC-GAL4	LH+LH-NOMPC:GFP	24.0145	0.04444
w*;nompC[3],UAS-LH+LH-NompC::GFP/nompC[3];nompC-GAL4	LH+LH-NOMPC:GFP	30.3765	0.04445
w*;nompC[3],UAS-LH+LH-NompC::GFP/nompC[3];nompC-GAL4	LH+LH-NOMPC:GFP	32.008	0.04445
w*;nompC[3],UAS-LH+LH-NompC::GFP/nompC[3];nompC-GAL4	LH+LH-NOMPC:GFP	34.8666	0.04445
w*;nompC[3],UAS-LH+LH-NompC::GFP/nompC[3];nompC-GAL4	LH+LH-NOMPC:GFP	36.036	0.04445
w*;nompC[3],UAS-LH+LH-NompC::GFP/nompC[3];nompC-GAL4	LH+LH-NOMPC:GFP	54.5641	0.04447
w*;nompC[3],UAS-LH+LH-NompC::GFP/nompC[3];nompC-GAL4	LH+LH-NOMPC:GFP	60.0601	0.04448
w*;nompC[3],UAS-LH+LH-NompC::GFP/nompC[3];nompC-GAL4	LH+LH-NOMPC:GFP	60.6361	0.04448
w*;nompC[3],UAS-LH+LH-NompC::GFP/nompC[3];nompC-GAL4	LH+LH-NOMPC:GFP	62.4007	0.04448
w*;nompC[3],UAS-LH+LH-NompC::GFP/nompC[3];nompC-GAL4	LH+LH-NOMPC:GFP	64.6784	0.04448
w*;nompC[3],UAS-LH+LH-NompC::GFP/nompC[3];nompC-GAL4	LH+LH-NOMPC:GFP	84.0841	0.04451
w*;nompC[3],UAS-LH+LH-NompC::GFP/nompC[3];nompC-GAL4	LH+LH-NOMPC:GFP	88.6142	0.04452
w*;nompC[3],UAS-LH+LH-NompC::GFP/nompC[3];nompC-GAL4	LH+LH-NOMPC:GFP	100.317	0.04454
w*;nompC[3],UAS-LH+LH-NompC::GFP/nompC[3];nompC-GAL4	LH+LH-NOMPC:GFP	101.394	0.04455
w*;nompC[3],UAS-LH+LH-NompC::GFP/nompC[3];nompC-GAL4	LH+LH-NOMPC:GFP	108.108	0.04456
w*;nompC[3],UAS-LH+LH-NompC::GFP/nompC[3];nompC-GAL4	LH+LH-NOMPC:GFP	117.942	0.04458
w*;nompC[3],UAS-LH+LH-NompC::GFP/nompC[3];nompC-GAL4	LH+LH-NOMPC:GFP	128.041	0.04461
w*;nompC[3],UAS-LH+LH-NompC::GFP/nompC[3];nompC-GAL4	LH+LH-NOMPC:GFP	132.132	0.04462
w*;nompC[3],UAS-LH+LH-NompC::GFP/nompC[3];nompC-GAL4	LH+LH-NOMPC:GFP	153.962	0.04468
w*;nompC[3],UAS-LH+LH-NompC::GFP/nompC[3];nompC-GAL4	LH+LH-NOMPC:GFP	156.156	0.04469
w*;nompC[3],UAS-LH+LH-NompC::GFP/nompC[3];nompC-GAL4	LH+LH-NOMPC:GFP	175.903	0.04476
w*;nompC[3],UAS-LH+LH-NompC::GFP/nompC[3];nompC-GAL4	LH+LH-NOMPC:GFP	180.18	0.04477
w*;nompC[3],UAS-LH+LH-NompC::GFP/nompC[3];nompC-GAL4	LH+LH-NOMPC:GFP	204.204	0.04487
w*;nompC[3],UAS-LH+LH-NompC::GFP/nompC[3];nompC-GAL4	LH+LH-NOMPC:GFP	228.228	0.04497
w*;nompC[3],UAS-LH+LH-NompC::GFP/nompC[3];nompC-GAL4	LH+LH-NOMPC:GFP	231.822	0.04498
w*;nompC[3],UAS-LH+LH-NompC::GFP/nompC[3];nompC-GAL4	LH+LH-NOMPC:GFP	235.824	0.045
w*;nompC[3],UAS-LH+LH-NompC::GFP/nompC[3];nompC-GAL4	LH+LH-NOMPC:GFP	252.149	0.04508
w*;nompC[3],UAS-LH+LH-NompC::GFP/nompC[3];nompC-GAL4	LH+LH-NOMPC:GFP	252.252	0.04508
w*;nompC[3],UAS-LH+LH-NompC::GFP/nompC[3];nompC-GAL4	LH+LH-NOMPC:GFP	276.276	0.0452
w*;nompC[3],UAS-LH+LH-NompC::GFP/nompC[3];nompC-GAL4	LH+LH-NOMPC:GFP	276.838	0.0452
w*;nompC[3],UAS-LH+LH-NompC::GFP/nompC[3];nompC-GAL4	LH+LH-NOMPC:GFP	300.3	0.04533
w*;nompC[3],UAS-LH+LH-NompC::GFP/nompC[3];nompC-GAL4	LH+LH-NOMPC:GFP	316.495	0.04542
w*;nompC[3],UAS-LH+LH-NompC::GFP/nompC[3];nompC-GAL4	LH+LH-NOMPC:GFP	324.324	0.04546
w*;nompC[3],UAS-LH+LH-NompC::GFP/nompC[3];nompC-GAL4	LH+LH-NOMPC:GFP	348.348	0.04561
w*;nompC[3],UAS-LH+LH-NompC::GFP/nompC[3];nompC-GAL4	LH+LH-NOMPC:GFP	372.372	0.04576
w*;nompC[3],UAS-LH+LH-NompC::GFP/nompC[3];nompC-GAL4	LH+LH-NOMPC:GFP	396.396	0.04591
w*;nompC[3],UAS-LH+LH-NompC::GFP/nompC[3];nompC-GAL4	LH+LH-NOMPC:GFP	420.42	0.04607
w*;nompC[3],UAS-LH+LH-NompC::GFP/nompC[3];nompC-GAL4	LH+LH-NOMPC:GFP	444.444	0.04624
w*;nompC[3],UAS-LH+LH-NompC::GFP/nompC[3];nompC-GAL4	LH+LH-NOMPC:GFP	468.468	0.04641
w*;nompC[3],UAS-LH+LH-NompC::GFP/nompC[3];nompC-GAL4	LH+LH-NOMPC:GFP	492.492	0.04658
w*;nompC[3],UAS-LH+LH-NompC::GFP/nompC[3];nompC-GAL4	LH+LH-NOMPC:GFP	516.517	0.04676
w*;nompC[3],UAS-LH+LH-NompC::GFP/nompC[3];nompC-GAL4	LH+LH-NOMPC:GFP	536.314	0.0469
w*;nompC[3],UAS-LH+LH-NompC::GFP/nompC[3];nompC-GAL4	LH+LH-NOMPC:GFP	540.541	0.04693
w*;nompC[3],UAS-LH+LH-NompC::GFP/nompC[3];nompC-GAL4	LH+LH-NOMPC:GFP	564.565	0.04712
w*;nompC[3],UAS-LH+LH-NompC::GFP/nompC[3];nompC-GAL4	LH+LH-NOMPC:GFP	565.789	0.04713
w*;nompC[3],UAS-LH+LH-NompC::GFP/nompC[3];nompC-GAL4	LH+LH-NOMPC:GFP	571.616	0.04717
w*;nompC[3],UAS-LH+LH-NompC::GFP/nompC[3];nompC-GAL4	LH+LH-NOMPC:GFP	574.241	0.04719
w*;nompC[3],UAS-LH+LH-NompC::GFP/nompC[3];nompC-GAL4	LH+LH-NOMPC:GFP	588.589	0.0473
w*;nompC[3],UAS-LH+LH-NompC::GFP/nompC[3];nompC-GAL4	LH+LH-NOMPC:GFP	612.613	0.04749
w*;nompC[3],UAS-LH+LH-NompC::GFP/nompC[3];nompC-GAL4	LH+LH-NOMPC:GFP	636.637	0.04767
w*;nompC[3],UAS-LH+LH-NompC::GFP/nompC[3];nompC-GAL4	LH+LH-NOMPC:GFP	659.289	0.04785
w*;nompC[3],UAS-LH+LH-NompC::GFP/nompC[3];nompC-GAL4	LH+LH-NOMPC:GFP	660.661	0.04786
w*;nompC[3],UAS-LH+LH-NompC::GFP/nompC[3];nompC-GAL4	LH+LH-NOMPC:GFP	684.685	0.04805
w*;nompC[3],UAS-LH+LH-NompC::GFP/nompC[3];nompC-GAL4	LH+LH-NOMPC:GFP	708.709	0.04824
w*;nompC[3],UAS-LH+LH-NompC::GFP/nompC[3];nompC-GAL4	LH+LH-NOMPC:GFP	732.733	0.04842
w*;nompC[3],UAS-LH+LH-NompC::GFP/nompC[3];nompC-GAL4	LH+LH-NOMPC:GFP	756.757	0.04861
w*;nompC[3],UAS-LH+LH-NompC::GFP/nompC[3];nompC-GAL4	LH+LH-NOMPC:GFP	780.781	0.0488
w*;nompC[3],UAS-LH+LH-NompC::GFP/nompC[3];nompC-GAL4	LH+LH-NOMPC:GFP	804.805	0.04899
w*;nompC[3],UAS-LH+LH-NompC::GFP/nompC[3];nompC-GAL4	LH+LH-NOMPC:GFP	828.829	0.04918
w*;nompC[3],UAS-LH+LH-NompC::GFP/nompC[3];nompC-GAL4	LH+LH-NOMPC:GFP	852.853	0.04937
w*;nompC[3],UAS-LH+LH-NompC::GFP/nompC[3];nompC-GAL4	LH+LH-NOMPC:GFP	876.877	0.04955
w*;nompC[3],UAS-LH+LH-NompC::GFP/nompC[3];nompC-GAL4	LH+LH-NOMPC:GFP	900.901	0.04974
w*;nompC[3],UAS-LH+LH-NompC::GFP/nompC[3];nompC-GAL4	LH+LH-NOMPC:GFP	924.925	0.04993
w*;nompC[3],UAS-LH+LH-NompC::GFP/nompC[3];nompC-GAL4	LH+LH-NOMPC:GFP	948.949	0.05011
w*;nompC[3],UAS-LH+LH-NompC::GFP/nompC[3];nompC-GAL4	LH+LH-NOMPC:GFP	972.973	0.0503
w*;nompC[3],UAS-LH+LH-NompC::GFP/nompC[3];nompC-GAL4	LH+LH-NOMPC:GFP	974.731	0.05031
w*;nompC[3],UAS-LH+LH-NompC::GFP/nompC[3];nompC-GAL4	LH+LH-NOMPC:GFP	996.997	0.05048
w*;nompC[3],UAS-LH+LH-NompC::GFP/nompC[3];nompC-GAL4	LH+LH-NOMPC:GFP	1012.69	0.0506
w*;nompC[3],UAS-LH+LH-NompC::GFP/nompC[3];nompC-GAL4	LH+LH-NOMPC:GFP	1021.02	0.05067
w*;nompC[3],UAS-LH+LH-NompC::GFP/nompC[3];nompC-GAL4	LH+LH-NOMPC:GFP	1024.59	0.05069
w*;nompC[3],UAS-LH+LH-NompC::GFP/nompC[3];nompC-GAL4	LH+LH-NOMPC:GFP	1045.05	0.05085
w*;nompC[3],UAS-LH+LH-NompC::GFP/nompC[3];nompC-GAL4	LH+LH-NOMPC:GFP	1069.07	0.05103
w*;nompC[3],UAS-LH+LH-NompC::GFP/nompC[3];nompC-GAL4	LH+LH-NOMPC:GFP	1072.71	0.05106
w*;nompC[3],UAS-LH+LH-NompC::GFP/nompC[3];nompC-GAL4	LH+LH-NOMPC:GFP	1093.09	0.05121
w*;nompC[3],UAS-LH+LH-NompC::GFP/nompC[3];nompC-GAL4	LH+LH-NOMPC:GFP	1117.12	0.05139
w*;nompC[3],UAS-LH+LH-NompC::GFP/nompC[3];nompC-GAL4	LH+LH-NOMPC:GFP	1141.14	0.05157
w*;nompC[3],UAS-LH+LH-NompC::GFP/nompC[3];nompC-GAL4	LH+LH-NOMPC:GFP	1163.81	0.05174
w*;nompC[3],UAS-LH+LH-NompC::GFP/nompC[3];nompC-GAL4	LH+LH-NOMPC:GFP	1165.17	0.05175
w*;nompC[3],UAS-LH+LH-NompC::GFP/nompC[3];nompC-GAL4	LH+LH-NOMPC:GFP	1189.19	0.05193
w*;nompC[3],UAS-LH+LH-NompC::GFP/nompC[3];nompC-GAL4	LH+LH-NOMPC:GFP	1213.21	0.05211
w*;nompC[3],UAS-LH+LH-NompC::GFP/nompC[3];nompC-GAL4	LH+LH-NOMPC:GFP	1237.24	0.05229
w*;nompC[3],UAS-LH+LH-NompC::GFP/nompC[3];nompC-GAL4	LH+LH-NOMPC:GFP	1261.26	0.05247
w*;nompC[3],UAS-LH+LH-NompC::GFP/nompC[3];nompC-GAL4	LH+LH-NOMPC:GFP	1285.29	0.05264
w*;nompC[3],UAS-LH+LH-NompC::GFP/nompC[3];nompC-GAL4	LH+LH-NOMPC:GFP	1309.31	0.05282
w*;nompC[3],UAS-LH+LH-NompC::GFP/nompC[3];nompC-GAL4	LH+LH-NOMPC:GFP	1333.33	0.05299
w*;nompC[3],UAS-LH+LH-NompC::GFP/nompC[3];nompC-GAL4	LH+LH-NOMPC:GFP	1357.36	0.05317
w*;nompC[3],UAS-LH+LH-NompC::GFP/nompC[3];nompC-GAL4	LH+LH-NOMPC:GFP	1381.38	0.05334
w*;nompC[3],UAS-LH+LH-NompC::GFP/nompC[3];nompC-GAL4	LH+LH-NOMPC:GFP	1405.41	0.05352
w*;nompC[3],UAS-LH+LH-NompC::GFP/nompC[3];nompC-GAL4	LH+LH-NOMPC:GFP	1407.8	0.05353
w*;nompC[3],UAS-LH+LH-NompC::GFP/nompC[3];nompC-GAL4	LH+LH-NOMPC:GFP	1429.43	0.05369
w*;nompC[3],UAS-LH+LH-NompC::GFP/nompC[3];nompC-GAL4	LH+LH-NOMPC:GFP	1445.64	0.0538
w*;nompC[3],UAS-LH+LH-NompC::GFP/nompC[3];nompC-GAL4	LH+LH-NOMPC:GFP	1453.45	0.05386
w*;nompC[3],UAS-LH+LH-NompC::GFP/nompC[3];nompC-GAL4	LH+LH-NOMPC:GFP	1477.31	0.05403
w*;nompC[3],UAS-LH+LH-NompC::GFP/nompC[3];nompC-GAL4	LH+LH-NOMPC:GFP	1477.48	0.05403
w*;nompC[3],UAS-LH+LH-NompC::GFP/nompC[3];nompC-GAL4	LH+LH-NOMPC:GFP	1501.5	0.0542
w*;nompC[3],UAS-LH+LH-NompC::GFP/nompC[3];nompC-GAL4	LH+LH-NOMPC:GFP	1525.53	0.05437
w*;nompC[3],UAS-LH+LH-NompC::GFP/nompC[3];nompC-GAL4	LH+LH-NOMPC:GFP	1549.55	0.05454
w*;nompC[3],UAS-LH+LH-NompC::GFP/nompC[3];nompC-GAL4	LH+LH-NOMPC:GFP	1558.46	0.05461
w*;nompC[3],UAS-LH+LH-NompC::GFP/nompC[3];nompC-GAL4	LH+LH-NOMPC:GFP	1573.57	0.05471
w*;nompC[3],UAS-LH+LH-NompC::GFP/nompC[3];nompC-GAL4	LH+LH-NOMPC:GFP	1597.6	0.05488
w*;nompC[3],UAS-LH+LH-NompC::GFP/nompC[3];nompC-GAL4	LH+LH-NOMPC:GFP	1621.62	0.05505
w*;nompC[3],UAS-LH+LH-NompC::GFP/nompC[3];nompC-GAL4	LH+LH-NOMPC:GFP	1645.65	0.05522
w*;nompC[3],UAS-LH+LH-NompC::GFP/nompC[3];nompC-GAL4	LH+LH-NOMPC:GFP	1659.78	0.05531
w*;nompC[3],UAS-LH+LH-NompC::GFP/nompC[3];nompC-GAL4	LH+LH-NOMPC:GFP	1669.67	0.05538
w*;nompC[3],UAS-LH+LH-NompC::GFP/nompC[3];nompC-GAL4	LH+LH-NOMPC:GFP	1693.69	0.05555
w*;nompC[3],UAS-LH+LH-NompC::GFP/nompC[3];nompC-GAL4	LH+LH-NOMPC:GFP	1717.72	0.05572
w*;nompC[3],UAS-LH+LH-NompC::GFP/nompC[3];nompC-GAL4	LH+LH-NOMPC:GFP	1741.74	0.05588
w*;nompC[3],UAS-LH+LH-NompC::GFP/nompC[3];nompC-GAL4	LH+LH-NOMPC:GFP	1765.77	0.05604
w*;nompC[3],UAS-LH+LH-NompC::GFP/nompC[3];nompC-GAL4	LH+LH-NOMPC:GFP	1789.79	0.05621
w*;nompC[3],UAS-LH+LH-NompC::GFP/nompC[3];nompC-GAL4	LH+LH-NOMPC:GFP	1813.81	0.05637
w*;nompC[3],UAS-LH+LH-NompC::GFP/nompC[3];nompC-GAL4	LH+LH-NOMPC:GFP	1827.3	0.05646
w*;nompC[3],UAS-LH+LH-NompC::GFP/nompC[3];nompC-GAL4	LH+LH-NOMPC:GFP	1837.84	0.05653
w*;nompC[3],UAS-LH+LH-NompC::GFP/nompC[3];nompC-GAL4	LH+LH-NOMPC:GFP	1861.86	0.05669
w*;nompC[3],UAS-LH+LH-NompC::GFP/nompC[3];nompC-GAL4	LH+LH-NOMPC:GFP	1863.55	0.0567
w*;nompC[3],UAS-LH+LH-NompC::GFP/nompC[3];nompC-GAL4	LH+LH-NOMPC:GFP	1885.89	0.05685
w*;nompC[3],UAS-LH+LH-NompC::GFP/nompC[3];nompC-GAL4	LH+LH-NOMPC:GFP	1909.91	0.05701
w*;nompC[3],UAS-LH+LH-NompC::GFP/nompC[3];nompC-GAL4	LH+LH-NOMPC:GFP	1921.49	0.05709
w*;nompC[3],UAS-LH+LH-NompC::GFP/nompC[3];nompC-GAL4	LH+LH-NOMPC:GFP	1933.93	0.05717
w*;nompC[3],UAS-LH+LH-NompC::GFP/nompC[3];nompC-GAL4	LH+LH-NOMPC:GFP	1957.96	0.05733
w*;nompC[3],UAS-LH+LH-NompC::GFP/nompC[3];nompC-GAL4	LH+LH-NOMPC:GFP	1981.98	0.05749
w*;nompC[3],UAS-LH+LH-NompC::GFP/nompC[3];nompC-GAL4	LH+LH-NOMPC:GFP	2006.01	0.05764
w*;nompC[3],UAS-LH+LH-NompC::GFP/nompC[3];nompC-GAL4	LH+LH-NOMPC:GFP	2030.03	0.0578
w*;nompC[3],UAS-LH+LH-NompC::GFP/nompC[3];nompC-GAL4	LH+LH-NOMPC:GFP	2031.86	0.05781
w*;nompC[3],UAS-LH+LH-NompC::GFP/nompC[3];nompC-GAL4	LH+LH-NOMPC:GFP	2054.05	0.05795
w*;nompC[3],UAS-LH+LH-NompC::GFP/nompC[3];nompC-GAL4	LH+LH-NOMPC:GFP	2078.08	0.0581
w*;nompC[3],UAS-LH+LH-NompC::GFP/nompC[3];nompC-GAL4	LH+LH-NOMPC:GFP	2102.1	0.05826
w*;nompC[3],UAS-LH+LH-NompC::GFP/nompC[3];nompC-GAL4	LH+LH-NOMPC:GFP	2126.13	0.05841
w*;nompC[3],UAS-LH+LH-NompC::GFP/nompC[3];nompC-GAL4	LH+LH-NOMPC:GFP	2143.57	0.05852
w*;nompC[3],UAS-LH+LH-NompC::GFP/nompC[3];nompC-GAL4	LH+LH-NOMPC:GFP	2150.15	0.05856
w*;nompC[3],UAS-LH+LH-NompC::GFP/nompC[3];nompC-GAL4	LH+LH-NOMPC:GFP	2174.17	0.05871
w*;nompC[3],UAS-LH+LH-NompC::GFP/nompC[3];nompC-GAL4	LH+LH-NOMPC:GFP	2198.2	0.05885
w*;nompC[3],UAS-LH+LH-NompC::GFP/nompC[3];nompC-GAL4	LH+LH-NOMPC:GFP	2222.22	0.059
w*;nompC[3],UAS-LH+LH-NompC::GFP/nompC[3];nompC-GAL4	LH+LH-NOMPC:GFP	2246.25	0.05915
w*;nompC[3],UAS-LH+LH-NompC::GFP/nompC[3];nompC-GAL4	LH+LH-NOMPC:GFP	2255.93	0.05921
w*;nompC[3],UAS-LH+LH-NompC::GFP/nompC[3];nompC-GAL4	LH+LH-NOMPC:GFP	2270.27	0.05929
w*;nompC[3],UAS-LH+LH-NompC::GFP/nompC[3];nompC-GAL4	LH+LH-NOMPC:GFP	2281.91	0.05936
w*;nompC[3],UAS-LH+LH-NompC::GFP/nompC[3];nompC-GAL4	LH+LH-NOMPC:GFP	2294.29	0.05944
w*;nompC[3],UAS-LH+LH-NompC::GFP/nompC[3];nompC-GAL4	LH+LH-NOMPC:GFP	2318.32	0.05958
w*;nompC[3],UAS-LH+LH-NompC::GFP/nompC[3];nompC-GAL4	LH+LH-NOMPC:GFP	2342.34	0.05972
w*;nompC[3],UAS-LH+LH-NompC::GFP/nompC[3];nompC-GAL4	LH+LH-NOMPC:GFP	2356.48	0.0598
w*;nompC[3],UAS-LH+LH-NompC::GFP/nompC[3];nompC-GAL4	LH+LH-NOMPC:GFP	2366.37	0.05986
w*;nompC[3],UAS-LH+LH-NompC::GFP/nompC[3];nompC-GAL4	LH+LH-NOMPC:GFP	2390.39	0.06
w*;nompC[3],UAS-LH+LH-NompC::GFP/nompC[3];nompC-GAL4	LH+LH-NOMPC:GFP	2414.41	0.06014
w*;nompC[3],UAS-LH+LH-NompC::GFP/nompC[3];nompC-GAL4	LH+LH-NOMPC:GFP	2438.44	0.06027
w*;nompC[3],UAS-LH+LH-NompC::GFP/nompC[3];nompC-GAL4	LH+LH-NOMPC:GFP	2462.46	0.06041
w*;nompC[3],UAS-LH+LH-NompC::GFP/nompC[3];nompC-GAL4	LH+LH-NOMPC:GFP	2486.49	0.06054
w*;nompC[3],UAS-LH+LH-NompC::GFP/nompC[3];nompC-GAL4	LH+LH-NOMPC:GFP	2500.76	0.06062
w*;nompC[3],UAS-LH+LH-NompC::GFP/nompC[3];nompC-GAL4	LH+LH-NOMPC:GFP	2510.51	0.06068
w*;nompC[3],UAS-LH+LH-NompC::GFP/nompC[3];nompC-GAL4	LH+LH-NOMPC:GFP	2534.53	0.06081
w*;nompC[3],UAS-LH+LH-NompC::GFP/nompC[3];nompC-GAL4	LH+LH-NOMPC:GFP	2558.56	0.06094
w*;nompC[3],UAS-LH+LH-NompC::GFP/nompC[3];nompC-GAL4	LH+LH-NOMPC:GFP	2582.58	0.06107
w*;nompC[3],UAS-LH+LH-NompC::GFP/nompC[3];nompC-GAL4	LH+LH-NOMPC:GFP	2606.61	0.0612
w*;nompC[3],UAS-LH+LH-NompC::GFP/nompC[3];nompC-GAL4	LH+LH-NOMPC:GFP	2625.15	0.0613
w*;nompC[3],UAS-LH+LH-NompC::GFP/nompC[3];nompC-GAL4	LH+LH-NOMPC:GFP	2630.63	0.06132
w*;nompC[3],UAS-LH+LH-NompC::GFP/nompC[3];nompC-GAL4	LH+LH-NOMPC:GFP	2654.65	0.06145
w*;nompC[3],UAS-LH+LH-NompC::GFP/nompC[3];nompC-GAL4	LH+LH-NOMPC:GFP	2678.68	0.06157
w*;nompC[3],UAS-LH+LH-NompC::GFP/nompC[3];nompC-GAL4	LH+LH-NOMPC:GFP	2702.7	0.0617
w*;nompC[3],UAS-LH+LH-NompC::GFP/nompC[3];nompC-GAL4	LH+LH-NOMPC:GFP	2726.73	0.06182
w*;nompC[3],UAS-LH+LH-NompC::GFP/nompC[3];nompC-GAL4	LH+LH-NOMPC:GFP	2750.75	0.06194
w*;nompC[3],UAS-LH+LH-NompC::GFP/nompC[3];nompC-GAL4	LH+LH-NOMPC:GFP	2774.77	0.06206
w*;nompC[3],UAS-LH+LH-NompC::GFP/nompC[3];nompC-GAL4	LH+LH-NOMPC:GFP	2798.8	0.06218
w*;nompC[3],UAS-LH+LH-NompC::GFP/nompC[3];nompC-GAL4	LH+LH-NOMPC:GFP	2822.82	0.06229
w*;nompC[3],UAS-LH+LH-NompC::GFP/nompC[3];nompC-GAL4	LH+LH-NOMPC:GFP	2846.85	0.06241
w*;nompC[3],UAS-LH+LH-NompC::GFP/nompC[3];nompC-GAL4	LH+LH-NOMPC:GFP	2870.87	0.06252
w*;nompC[3],UAS-LH+LH-NompC::GFP/nompC[3];nompC-GAL4	LH+LH-NOMPC:GFP	2894.89	0.06264
w*;nompC[3],UAS-LH+LH-NompC::GFP/nompC[3];nompC-GAL4	LH+LH-NOMPC:GFP	2918.92	0.06275
w*;nompC[3],UAS-LH+LH-NompC::GFP/nompC[3];nompC-GAL4	LH+LH-NOMPC:GFP	2942.94	0.06286
w*;nompC[3],UAS-LH+LH-NompC::GFP/nompC[3];nompC-GAL4	LH+LH-NOMPC:GFP	2966.97	0.06297
w*;nompC[3],UAS-LH+LH-NompC::GFP/nompC[3];nompC-GAL4	LH+LH-NOMPC:GFP	2990.99	0.06308
w*;nompC[3],UAS-LH+LH-NompC::GFP/nompC[3];nompC-GAL4	LH+LH-NOMPC:GFP	3015.02	0.06318
w*;nompC[3],UAS-LH+LH-NompC::GFP/nompC[3];nompC-GAL4	LH+LH-NOMPC:GFP	3039.04	0.06329
w*;nompC[3],UAS-LH+LH-NompC::GFP/nompC[3];nompC-GAL4	LH+LH-NOMPC:GFP	3063.06	0.06339
w*;nompC[3],UAS-LH+LH-NompC::GFP/nompC[3];nompC-GAL4	LH+LH-NOMPC:GFP	3065.02	0.0634
w*;nompC[3],UAS-LH+LH-NompC::GFP/nompC[3];nompC-GAL4	LH+LH-NOMPC:GFP	3067.89	0.06341
w*;nompC[3],UAS-LH+LH-NompC::GFP/nompC[3];nompC-GAL4	LH+LH-NOMPC:GFP	3087.09	0.06349
w*;nompC[3],UAS-LH+LH-NompC::GFP/nompC[3];nompC-GAL4	LH+LH-NOMPC:GFP	3111.11	0.0636
w*;nompC[3],UAS-LH+LH-NompC::GFP/nompC[3];nompC-GAL4	LH+LH-NOMPC:GFP	3135.14	0.0637
w*;nompC[3],UAS-LH+LH-NompC::GFP/nompC[3];nompC-GAL4	LH+LH-NOMPC:GFP	3159.16	0.0638
w*;nompC[3],UAS-LH+LH-NompC::GFP/nompC[3];nompC-GAL4	LH+LH-NOMPC:GFP	3173.97	0.06386
w*;nompC[3],UAS-LH+LH-NompC::GFP/nompC[3];nompC-GAL4	LH+LH-NOMPC:GFP	3183.18	0.06389
w*;nompC[3],UAS-LH+LH-NompC::GFP/nompC[3];nompC-GAL4	LH+LH-NOMPC:GFP	3207.21	0.06399
w*;nompC[3],UAS-LH+LH-NompC::GFP/nompC[3];nompC-GAL4	LH+LH-NOMPC:GFP	3231.23	0.06408
w*;nompC[3],UAS-LH+LH-NompC::GFP/nompC[3];nompC-GAL4	LH+LH-NOMPC:GFP	3255.26	0.06418
w*;nompC[3],UAS-LH+LH-NompC::GFP/nompC[3];nompC-GAL4	LH+LH-NOMPC:GFP	3279.28	0.06427
w*;nompC[3],UAS-LH+LH-NompC::GFP/nompC[3];nompC-GAL4	LH+LH-NOMPC:GFP	3303.3	0.06436
w*;nompC[3],UAS-LH+LH-NompC::GFP/nompC[3];nompC-GAL4	LH+LH-NOMPC:GFP	3327.33	0.06445
w*;nompC[3],UAS-LH+LH-NompC::GFP/nompC[3];nompC-GAL4	LH+LH-NOMPC:GFP	3351.35	0.06454
w*;nompC[3],UAS-LH+LH-NompC::GFP/nompC[3];nompC-GAL4	LH+LH-NOMPC:GFP	3375.38	0.06463
w*;nompC[3],UAS-LH+LH-NompC::GFP/nompC[3];nompC-GAL4	LH+LH-NOMPC:GFP	3376.98	0.06464
w*;nompC[3],UAS-LH+LH-NompC::GFP/nompC[3];nompC-GAL4	LH+LH-NOMPC:GFP	3399.4	0.06472
w*;nompC[3],UAS-LH+LH-NompC::GFP/nompC[3];nompC-GAL4	LH+LH-NOMPC:GFP	3423.42	0.0648
w*;nompC[3],UAS-LH+LH-NompC::GFP/nompC[3];nompC-GAL4	LH+LH-NOMPC:GFP	3447.45	0.06489
w*;nompC[3],UAS-LH+LH-NompC::GFP/nompC[3];nompC-GAL4	LH+LH-NOMPC:GFP	3471.47	0.06497
w*;nompC[3],UAS-LH+LH-NompC::GFP/nompC[3];nompC-GAL4	LH+LH-NOMPC:GFP	3495.5	0.06505
w*;nompC[3],UAS-LH+LH-NompC::GFP/nompC[3];nompC-GAL4	LH+LH-NOMPC:GFP	3519.52	0.06513
w*;nompC[3],UAS-LH+LH-NompC::GFP/nompC[3];nompC-GAL4	LH+LH-NOMPC:GFP	3524.25	0.06515
w*;nompC[3],UAS-LH+LH-NompC::GFP/nompC[3];nompC-GAL4	LH+LH-NOMPC:GFP	3543.54	0.06521
w*;nompC[3],UAS-LH+LH-NompC::GFP/nompC[3];nompC-GAL4	LH+LH-NOMPC:GFP	3567.57	0.06529
w*;nompC[3],UAS-LH+LH-NompC::GFP/nompC[3];nompC-GAL4	LH+LH-NOMPC:GFP	3591.59	0.06537
w*;nompC[3],UAS-LH+LH-NompC::GFP/nompC[3];nompC-GAL4	LH+LH-NOMPC:GFP	3615.62	0.06545
w*;nompC[3],UAS-LH+LH-NompC::GFP/nompC[3];nompC-GAL4	LH+LH-NOMPC:GFP	3639.64	0.06552
w*;nompC[3],UAS-LH+LH-NompC::GFP/nompC[3];nompC-GAL4	LH+LH-NOMPC:GFP	3663.66	0.06559
w*;nompC[3],UAS-LH+LH-NompC::GFP/nompC[3];nompC-GAL4	LH+LH-NOMPC:GFP	3687.69	0.06567
w*;nompC[3],UAS-LH+LH-NompC::GFP/nompC[3];nompC-GAL4	LH+LH-NOMPC:GFP	3711.71	0.06574
w*;nompC[3],UAS-LH+LH-NompC::GFP/nompC[3];nompC-GAL4	LH+LH-NOMPC:GFP	3735.74	0.06581
w*;nompC[3],UAS-LH+LH-NompC::GFP/nompC[3];nompC-GAL4	LH+LH-NOMPC:GFP	3759.76	0.06588
w*;nompC[3],UAS-LH+LH-NompC::GFP/nompC[3];nompC-GAL4	LH+LH-NOMPC:GFP	3783.78	0.06595
w*;nompC[3],UAS-LH+LH-NompC::GFP/nompC[3];nompC-GAL4	LH+LH-NOMPC:GFP	3807.81	0.06602
w*;nompC[3],UAS-LH+LH-NompC::GFP/nompC[3];nompC-GAL4	LH+LH-NOMPC:GFP	3831.83	0.06608
w*;nompC[3],UAS-LH+LH-NompC::GFP/nompC[3];nompC-GAL4	LH+LH-NOMPC:GFP	3855.86	0.06615
w*;nompC[3],UAS-LH+LH-NompC::GFP/nompC[3];nompC-GAL4	LH+LH-NOMPC:GFP	3879.88	0.06622
w*;nompC[3],UAS-LH+LH-NompC::GFP/nompC[3];nompC-GAL4	LH+LH-NOMPC:GFP	3903.9	0.06628
w*;nompC[3],UAS-LH+LH-NompC::GFP/nompC[3];nompC-GAL4	LH+LH-NOMPC:GFP	3927.93	0.06634
w*;nompC[3],UAS-LH+LH-NompC::GFP/nompC[3];nompC-GAL4	LH+LH-NOMPC:GFP	3951.95	0.0664
w*;nompC[3],UAS-LH+LH-NompC::GFP/nompC[3];nompC-GAL4	LH+LH-NOMPC:GFP	3975.98	0.06647
w*;nompC[3],UAS-LH+LH-NompC::GFP/nompC[3];nompC-GAL4	LH+LH-NOMPC:GFP	4000	0.06653
w*;nompC[3],UAS-LH+LH-NompC::GFP/nompC[3];nompC-GAL4	LH+LH-NOMPC:GFP	4024.02	0.06658
w*;nompC[3],UAS-LH+LH-NompC::GFP/nompC[3];nompC-GAL4	LH+LH-NOMPC:GFP	4048.05	0.06664
w*;nompC[3],UAS-LH+LH-NompC::GFP/nompC[3];nompC-GAL4	LH+LH-NOMPC:GFP	4072.07	0.0667
w*;nompC[3],UAS-LH+LH-NompC::GFP/nompC[3];nompC-GAL4	LH+LH-NOMPC:GFP	4096.1	0.06676
w*;nompC[3],UAS-LH+LH-NompC::GFP/nompC[3];nompC-GAL4	LH+LH-NOMPC:GFP	4120.12	0.06681
w*;nompC[3],UAS-LH+LH-NompC::GFP/nompC[3];nompC-GAL4	LH+LH-NOMPC:GFP	4144.14	0.06687
w*;nompC[3],UAS-LH+LH-NompC::GFP/nompC[3];nompC-GAL4	LH+LH-NOMPC:GFP	4168.17	0.06692
w*;nompC[3],UAS-LH+LH-NompC::GFP/nompC[3];nompC-GAL4	LH+LH-NOMPC:GFP	4192.19	0.06697
w*;nompC[3],UAS-LH+LH-NompC::GFP/nompC[3];nompC-GAL4	LH+LH-NOMPC:GFP	4216.22	0.06703
w*;nompC[3],UAS-LH+LH-NompC::GFP/nompC[3];nompC-GAL4	LH+LH-NOMPC:GFP	4240.24	0.06708
w*;nompC[3],UAS-LH+LH-NompC::GFP/nompC[3];nompC-GAL4	LH+LH-NOMPC:GFP	4264.26	0.06713
w*;nompC[3],UAS-LH+LH-NompC::GFP/nompC[3];nompC-GAL4	LH+LH-NOMPC:GFP	4288.29	0.06718
w*;nompC[3],UAS-LH+LH-NompC::GFP/nompC[3];nompC-GAL4	LH+LH-NOMPC:GFP	4312.31	0.06723
w*;nompC[3],UAS-LH+LH-NompC::GFP/nompC[3];nompC-GAL4	LH+LH-NOMPC:GFP	4336.34	0.06728
w*;nompC[3],UAS-LH+LH-NompC::GFP/nompC[3];nompC-GAL4	LH+LH-NOMPC:GFP	4360.36	0.06732
w*;nompC[3],UAS-LH+LH-NompC::GFP/nompC[3];nompC-GAL4	LH+LH-NOMPC:GFP	4384.38	0.06737
w*;nompC[3],UAS-LH+LH-NompC::GFP/nompC[3];nompC-GAL4	LH+LH-NOMPC:GFP	4408.41	0.06741
w*;nompC[3],UAS-LH+LH-NompC::GFP/nompC[3];nompC-GAL4	LH+LH-NOMPC:GFP	4432.43	0.06746
w*;nompC[3],UAS-LH+LH-NompC::GFP/nompC[3];nompC-GAL4	LH+LH-NOMPC:GFP	4456.46	0.0675
w*;nompC[3],UAS-LH+LH-NompC::GFP/nompC[3];nompC-GAL4	LH+LH-NOMPC:GFP	4480.48	0.06755
w*;nompC[3],UAS-LH+LH-NompC::GFP/nompC[3];nompC-GAL4	LH+LH-NOMPC:GFP	4504.5	0.06759
w*;nompC[3],UAS-LH+LH-NompC::GFP/nompC[3];nompC-GAL4	LH+LH-NOMPC:GFP	4528.53	0.06763
w*;nompC[3],UAS-LH+LH-NompC::GFP/nompC[3];nompC-GAL4	LH+LH-NOMPC:GFP	4552.55	0.06767
w*;nompC[3],UAS-LH+LH-NompC::GFP/nompC[3];nompC-GAL4	LH+LH-NOMPC:GFP	4576.58	0.06772
w*;nompC[3],UAS-LH+LH-NompC::GFP/nompC[3];nompC-GAL4	LH+LH-NOMPC:GFP	4600.6	0.06776
w*;nompC[3],UAS-LH+LH-NompC::GFP/nompC[3];nompC-GAL4	LH+LH-NOMPC:GFP	4624.62	0.0678
w*;nompC[3],UAS-LH+LH-NompC::GFP/nompC[3];nompC-GAL4	LH+LH-NOMPC:GFP	4648.65	0.06783
w*;nompC[3],UAS-LH+LH-NompC::GFP/nompC[3];nompC-GAL4	LH+LH-NOMPC:GFP	4672.67	0.06787
w*;nompC[3],UAS-LH+LH-NompC::GFP/nompC[3];nompC-GAL4	LH+LH-NOMPC:GFP	4696.7	0.06791
w*;nompC[3],UAS-LH+LH-NompC::GFP/nompC[3];nompC-GAL4	LH+LH-NOMPC:GFP	4720.72	0.06795
w*;nompC[3],UAS-LH+LH-NompC::GFP/nompC[3];nompC-GAL4	LH+LH-NOMPC:GFP	4744.74	0.06798
w*;nompC[3],UAS-LH+LH-NompC::GFP/nompC[3];nompC-GAL4	LH+LH-NOMPC:GFP	4768.77	0.06802
w*;nompC[3],UAS-LH+LH-NompC::GFP/nompC[3];nompC-GAL4	LH+LH-NOMPC:GFP	4792.79	0.06805
w*;nompC[3],UAS-LH+LH-NompC::GFP/nompC[3];nompC-GAL4	LH+LH-NOMPC:GFP	4816.82	0.06809
w*;nompC[3],UAS-LH+LH-NompC::GFP/nompC[3];nompC-GAL4	LH+LH-NOMPC:GFP	4840.84	0.06812
w*;nompC[3],UAS-LH+LH-NompC::GFP/nompC[3];nompC-GAL4	LH+LH-NOMPC:GFP	4864.86	0.06816
w*;nompC[3],UAS-LH+LH-NompC::GFP/nompC[3];nompC-GAL4	LH+LH-NOMPC:GFP	4888.89	0.06819
w*;nompC[3],UAS-LH+LH-NompC::GFP/nompC[3];nompC-GAL4	LH+LH-NOMPC:GFP	4912.91	0.06822
w*;nompC[3],UAS-LH+LH-NompC::GFP/nompC[3];nompC-GAL4	LH+LH-NOMPC:GFP	4936.94	0.06825
w*;nompC[3],UAS-LH+LH-NompC::GFP/nompC[3];nompC-GAL4	LH+LH-NOMPC:GFP	4960.96	0.06828
w*;nompC[3],UAS-LH+LH-NompC::GFP/nompC[3];nompC-GAL4	LH+LH-NOMPC:GFP	4984.98	0.06831
w*;nompC[3],UAS-LH+LH-NompC::GFP/nompC[3];nompC-GAL4	LH+LH-NOMPC:GFP	5009.01	0.06834
w*;nompC[3],UAS-LH+LH-NompC::GFP/nompC[3];nompC-GAL4	LH+LH-NOMPC:GFP	5033.03	0.06837
w*;nompC[3],UAS-LH+LH-NompC::GFP/nompC[3];nompC-GAL4	LH+LH-NOMPC:GFP	5057.06	0.0684
w*;nompC[3],UAS-LH+LH-NompC::GFP/nompC[3];nompC-GAL4	LH+LH-NOMPC:GFP	5081.08	0.06843
w*;nompC[3],UAS-LH+LH-NompC::GFP/nompC[3];nompC-GAL4	LH+LH-NOMPC:GFP	5105.11	0.06846
w*;nompC[3],UAS-LH+LH-NompC::GFP/nompC[3];nompC-GAL4	LH+LH-NOMPC:GFP	5129.13	0.06849
w*;nompC[3],UAS-LH+LH-NompC::GFP/nompC[3];nompC-GAL4	LH+LH-NOMPC:GFP	5153.15	0.06851
w*;nompC[3],UAS-LH+LH-NompC::GFP/nompC[3];nompC-GAL4	LH+LH-NOMPC:GFP	5177.18	0.06854
w*;nompC[3],UAS-LH+LH-NompC::GFP/nompC[3];nompC-GAL4	LH+LH-NOMPC:GFP	5201.2	0.06857
w*;nompC[3],UAS-LH+LH-NompC::GFP/nompC[3];nompC-GAL4	LH+LH-NOMPC:GFP	5225.23	0.06859
w*;nompC[3],UAS-LH+LH-NompC::GFP/nompC[3];nompC-GAL4	LH+LH-NOMPC:GFP	5249.25	0.06862
w*;nompC[3],UAS-LH+LH-NompC::GFP/nompC[3];nompC-GAL4	LH+LH-NOMPC:GFP	5273.27	0.06864
w*;nompC[3],UAS-LH+LH-NompC::GFP/nompC[3];nompC-GAL4	LH+LH-NOMPC:GFP	5290.41	0.06866
w*;nompC[3],UAS-LH+LH-NompC::GFP/nompC[3];nompC-GAL4	LH+LH-NOMPC:GFP	5294.41	0.06866
w*;nompC[3],UAS-LH+LH-NompC::GFP/nompC[3];nompC-GAL4	LH+LH-NOMPC:GFP	5297.3	0.06867
w*;nompC[3],UAS-LH+LH-NompC::GFP/nompC[3];nompC-GAL4	LH+LH-NOMPC:GFP	5321.32	0.06869
w*;nompC[3],UAS-LH+LH-NompC::GFP/nompC[3];nompC-GAL4	LH+LH-NOMPC:GFP	5345.35	0.06871
w*;nompC[3],UAS-LH+LH-NompC::GFP/nompC[3];nompC-GAL4	LH+LH-NOMPC:GFP	5369.37	0.06874
w*;nompC[3],UAS-LH+LH-NompC::GFP/nompC[3];nompC-GAL4	LH+LH-NOMPC:GFP	5393.39	0.06876
w*;nompC[3],UAS-LH+LH-NompC::GFP/nompC[3];nompC-GAL4	LH+LH-NOMPC:GFP	5417.42	0.06878
w*;nompC[3],UAS-LH+LH-NompC::GFP/nompC[3];nompC-GAL4	LH+LH-NOMPC:GFP	5441.44	0.06881
w*;nompC[3],UAS-LH+LH-NompC::GFP/nompC[3];nompC-GAL4	LH+LH-NOMPC:GFP	5465.47	0.06883
w*;nompC[3],UAS-LH+LH-NompC::GFP/nompC[3];nompC-GAL4	LH+LH-NOMPC:GFP	5477.78	0.06884
w*;nompC[3],UAS-LH+LH-NompC::GFP/nompC[3];nompC-GAL4	LH+LH-NOMPC:GFP	5489.49	0.06885
w*;nompC[3],UAS-LH+LH-NompC::GFP/nompC[3];nompC-GAL4	LH+LH-NOMPC:GFP	5513.51	0.06887
w*;nompC[3],UAS-LH+LH-NompC::GFP/nompC[3];nompC-GAL4	LH+LH-NOMPC:GFP	5537.54	0.06889
w*;nompC[3],UAS-LH+LH-NompC::GFP/nompC[3];nompC-GAL4	LH+LH-NOMPC:GFP	5561.56	0.06891
w*;nompC[3],UAS-LH+LH-NompC::GFP/nompC[3];nompC-GAL4	LH+LH-NOMPC:GFP	5585.59	0.06893
w*;nompC[3],UAS-LH+LH-NompC::GFP/nompC[3];nompC-GAL4	LH+LH-NOMPC:GFP	5609.61	0.06895
w*;nompC[3],UAS-LH+LH-NompC::GFP/nompC[3];nompC-GAL4	LH+LH-NOMPC:GFP	5633.63	0.06897
w*;nompC[3],UAS-LH+LH-NompC::GFP/nompC[3];nompC-GAL4	LH+LH-NOMPC:GFP	5657.66	0.06899
w*;nompC[3],UAS-LH+LH-NompC::GFP/nompC[3];nompC-GAL4	LH+LH-NOMPC:GFP	5681.68	0.069
w*;nompC[3],UAS-LH+LH-NompC::GFP/nompC[3];nompC-GAL4	LH+LH-NOMPC:GFP	5705.71	0.06902
w*;nompC[3],UAS-LH+LH-NompC::GFP/nompC[3];nompC-GAL4	LH+LH-NOMPC:GFP	5729.73	0.06904
w*;nompC[3],UAS-LH+LH-NompC::GFP/nompC[3];nompC-GAL4	LH+LH-NOMPC:GFP	5753.75	0.06906
w*;nompC[3],UAS-LH+LH-NompC::GFP/nompC[3];nompC-GAL4	LH+LH-NOMPC:GFP	5777.78	0.06907
w*;nompC[3],UAS-LH+LH-NompC::GFP/nompC[3];nompC-GAL4	LH+LH-NOMPC:GFP	5801.8	0.06909
w*;nompC[3],UAS-LH+LH-NompC::GFP/nompC[3];nompC-GAL4	LH+LH-NOMPC:GFP	5825.83	0.06911
w*;nompC[3],UAS-LH+LH-NompC::GFP/nompC[3];nompC-GAL4	LH+LH-NOMPC:GFP	5843.45	0.06912
w*;nompC[3],UAS-LH+LH-NompC::GFP/nompC[3];nompC-GAL4	LH+LH-NOMPC:GFP	5849.85	0.06912
w*;nompC[3],UAS-LH+LH-NompC::GFP/nompC[3];nompC-GAL4	LH+LH-NOMPC:GFP	5873.87	0.06914
w*;nompC[3],UAS-LH+LH-NompC::GFP/nompC[3];nompC-GAL4	LH+LH-NOMPC:GFP	5897.9	0.06916
w*;nompC[3],UAS-LH+LH-NompC::GFP/nompC[3];nompC-GAL4	LH+LH-NOMPC:GFP	5921.92	0.06917
w*;nompC[3],UAS-LH+LH-NompC::GFP/nompC[3];nompC-GAL4	LH+LH-NOMPC:GFP	5945.95	0.06919
w*;nompC[3],UAS-LH+LH-NompC::GFP/nompC[3];nompC-GAL4	LH+LH-NOMPC:GFP	5969.97	0.0692
w*;nompC[3],UAS-LH+LH-NompC::GFP/nompC[3];nompC-GAL4	LH+LH-NOMPC:GFP	5993.99	0.06922
w*;nompC[3],UAS-LH+LH-NompC::GFP/nompC[3];nompC-GAL4	LH+LH-NOMPC:GFP	6018.02	0.06923
w*;nompC[3],UAS-LH+LH-NompC::GFP/nompC[3];nompC-GAL4	LH+LH-NOMPC:GFP	6042.04	0.06924
w*;nompC[3],UAS-LH+LH-NompC::GFP/nompC[3];nompC-GAL4	LH+LH-NOMPC:GFP	6066.07	0.06926
w*;nompC[3],UAS-LH+LH-NompC::GFP/nompC[3];nompC-GAL4	LH+LH-NOMPC:GFP	6088.43	0.06927
w*;nompC[3],UAS-LH+LH-NompC::GFP/nompC[3];nompC-GAL4	LH+LH-NOMPC:GFP	6090.09	0.06927
w*;nompC[3],UAS-LH+LH-NompC::GFP/nompC[3];nompC-GAL4	LH+LH-NOMPC:GFP	6114.11	0.06928
w*;nompC[3],UAS-LH+LH-NompC::GFP/nompC[3];nompC-GAL4	LH+LH-NOMPC:GFP	6138.14	0.0693
w*;nompC[3],UAS-LH+LH-NompC::GFP/nompC[3];nompC-GAL4	LH+LH-NOMPC:GFP	6162.16	0.06931
w*;nompC[3],UAS-LH+LH-NompC::GFP/nompC[3];nompC-GAL4	LH+LH-NOMPC:GFP	6186.19	0.06932
w*;nompC[3],UAS-LH+LH-NompC::GFP/nompC[3];nompC-GAL4	LH+LH-NOMPC:GFP	6210.21	0.06934
w*;nompC[3],UAS-LH+LH-NompC::GFP/nompC[3];nompC-GAL4	LH+LH-NOMPC:GFP	6234.23	0.06935
w*;nompC[3],UAS-LH+LH-NompC::GFP/nompC[3];nompC-GAL4	LH+LH-NOMPC:GFP	6258.26	0.06936
w*;nompC[3],UAS-LH+LH-NompC::GFP/nompC[3];nompC-GAL4	LH+LH-NOMPC:GFP	6282.28	0.06937
w*;nompC[3],UAS-LH+LH-NompC::GFP/nompC[3];nompC-GAL4	LH+LH-NOMPC:GFP	6306.31	0.06938
w*;nompC[3],UAS-LH+LH-NompC::GFP/nompC[3];nompC-GAL4	LH+LH-NOMPC:GFP	6330.33	0.06939
w*;nompC[3],UAS-LH+LH-NompC::GFP/nompC[3];nompC-GAL4	LH+LH-NOMPC:GFP	6354.35	0.06941
w*;nompC[3],UAS-LH+LH-NompC::GFP/nompC[3];nompC-GAL4	LH+LH-NOMPC:GFP	6378.38	0.06942
w*;nompC[3],UAS-LH+LH-NompC::GFP/nompC[3];nompC-GAL4	LH+LH-NOMPC:GFP	6402.4	0.06943
w*;nompC[3],UAS-LH+LH-NompC::GFP/nompC[3];nompC-GAL4	LH+LH-NOMPC:GFP	6426.43	0.06944
w*;nompC[3],UAS-LH+LH-NompC::GFP/nompC[3];nompC-GAL4	LH+LH-NOMPC:GFP	6450.45	0.06945
w*;nompC[3],UAS-LH+LH-NompC::GFP/nompC[3];nompC-GAL4	LH+LH-NOMPC:GFP	6474.47	0.06946
w*;nompC[3],UAS-LH+LH-NompC::GFP/nompC[3];nompC-GAL4	LH+LH-NOMPC:GFP	6498.5	0.06947
w*;nompC[3],UAS-LH+LH-NompC::GFP/nompC[3];nompC-GAL4	LH+LH-NOMPC:GFP	6522.52	0.06948
w*;nompC[3],UAS-LH+LH-NompC::GFP/nompC[3];nompC-GAL4	LH+LH-NOMPC:GFP	6546.55	0.06949
w*;nompC[3],UAS-LH+LH-NompC::GFP/nompC[3];nompC-GAL4	LH+LH-NOMPC:GFP	6570.57	0.0695
w*;nompC[3],UAS-LH+LH-NompC::GFP/nompC[3];nompC-GAL4	LH+LH-NOMPC:GFP	6594.59	0.06951
w*;nompC[3],UAS-LH+LH-NompC::GFP/nompC[3];nompC-GAL4	LH+LH-NOMPC:GFP	6618.62	0.06952
w*;nompC[3],UAS-LH+LH-NompC::GFP/nompC[3];nompC-GAL4	LH+LH-NOMPC:GFP	6642.64	0.06952
w*;nompC[3],UAS-LH+LH-NompC::GFP/nompC[3];nompC-GAL4	LH+LH-NOMPC:GFP	6666.67	0.06953
w*;nompC[3],UAS-LH+LH-NompC::GFP/nompC[3];nompC-GAL4	LH+LH-NOMPC:GFP	6690.69	0.06954
w*;nompC[3],UAS-LH+LH-NompC::GFP/nompC[3];nompC-GAL4	LH+LH-NOMPC:GFP	6714.71	0.06955
w*;nompC[3],UAS-LH+LH-NompC::GFP/nompC[3];nompC-GAL4	LH+LH-NOMPC:GFP	6738.74	0.06956
w*;nompC[3],UAS-LH+LH-NompC::GFP/nompC[3];nompC-GAL4	LH+LH-NOMPC:GFP	6762.76	0.06957
w*;nompC[3],UAS-LH+LH-NompC::GFP/nompC[3];nompC-GAL4	LH+LH-NOMPC:GFP	6786.79	0.06957
w*;nompC[3],UAS-LH+LH-NompC::GFP/nompC[3];nompC-GAL4	LH+LH-NOMPC:GFP	6810.81	0.06958
w*;nompC[3],UAS-LH+LH-NompC::GFP/nompC[3];nompC-GAL4	LH+LH-NOMPC:GFP	6834.83	0.06959
w*;nompC[3],UAS-LH+LH-NompC::GFP/nompC[3];nompC-GAL4	LH+LH-NOMPC:GFP	6858.86	0.0696
w*;nompC[3],UAS-LH+LH-NompC::GFP/nompC[3];nompC-GAL4	LH+LH-NOMPC:GFP	6882.88	0.0696
w*;nompC[3],UAS-LH+LH-NompC::GFP/nompC[3];nompC-GAL4	LH+LH-NOMPC:GFP	6906.91	0.06961
w*;nompC[3],UAS-LH+LH-NompC::GFP/nompC[3];nompC-GAL4	LH+LH-NOMPC:GFP	6930.93	0.06962
w*;nompC[3],UAS-LH+LH-NompC::GFP/nompC[3];nompC-GAL4	LH+LH-NOMPC:GFP	6954.95	0.06963
w*;nompC[3],UAS-LH+LH-NompC::GFP/nompC[3];nompC-GAL4	LH+LH-NOMPC:GFP	6978.98	0.06963
w*;nompC[3],UAS-LH+LH-NompC::GFP/nompC[3];nompC-GAL4	LH+LH-NOMPC:GFP	7003	0.06964
w*;nompC[3],UAS-LH+LH-NompC::GFP/nompC[3];nompC-GAL4	LH+LH-NOMPC:GFP	7027.03	0.06965
w*;nompC[3],UAS-LH+LH-NompC::GFP/nompC[3];nompC-GAL4	LH+LH-NOMPC:GFP	7051.05	0.06965
w*;nompC[3],UAS-LH+LH-NompC::GFP/nompC[3];nompC-GAL4	LH+LH-NOMPC:GFP	7075.08	0.06966
w*;nompC[3],UAS-LH+LH-NompC::GFP/nompC[3];nompC-GAL4	LH+LH-NOMPC:GFP	7099.1	0.06967
w*;nompC[3],UAS-LH+LH-NompC::GFP/nompC[3];nompC-GAL4	LH+LH-NOMPC:GFP	7123.12	0.06967
w*;nompC[3],UAS-LH+LH-NompC::GFP/nompC[3];nompC-GAL4	LH+LH-NOMPC:GFP	7147.15	0.06968
w*;nompC[3],UAS-LH+LH-NompC::GFP/nompC[3];nompC-GAL4	LH+LH-NOMPC:GFP	7171.17	0.06968
w*;nompC[3],UAS-LH+LH-NompC::GFP/nompC[3];nompC-GAL4	LH+LH-NOMPC:GFP	7195.2	0.06969
w*;nompC[3],UAS-LH+LH-NompC::GFP/nompC[3];nompC-GAL4	LH+LH-NOMPC:GFP	7219.22	0.0697
w*;nompC[3],UAS-LH+LH-NompC::GFP/nompC[3];nompC-GAL4	LH+LH-NOMPC:GFP	7243.24	0.0697
w*;nompC[3],UAS-LH+LH-NompC::GFP/nompC[3];nompC-GAL4	LH+LH-NOMPC:GFP	7267.27	0.06971
w*;nompC[3],UAS-LH+LH-NompC::GFP/nompC[3];nompC-GAL4	LH+LH-NOMPC:GFP	7291.29	0.06971
w*;nompC[3],UAS-LH+LH-NompC::GFP/nompC[3];nompC-GAL4	LH+LH-NOMPC:GFP	7315.32	0.06972
w*;nompC[3],UAS-LH+LH-NompC::GFP/nompC[3];nompC-GAL4	LH+LH-NOMPC:GFP	7339.34	0.06972
w*;nompC[3],UAS-LH+LH-NompC::GFP/nompC[3];nompC-GAL4	LH+LH-NOMPC:GFP	7363.36	0.06973
w*;nompC[3],UAS-LH+LH-NompC::GFP/nompC[3];nompC-GAL4	LH+LH-NOMPC:GFP	7387.39	0.06973
w*;nompC[3],UAS-LH+LH-NompC::GFP/nompC[3];nompC-GAL4	LH+LH-NOMPC:GFP	7411.41	0.06974
w*;nompC[3],UAS-LH+LH-NompC::GFP/nompC[3];nompC-GAL4	LH+LH-NOMPC:GFP	7435.44	0.06974
w*;nompC[3],UAS-LH+LH-NompC::GFP/nompC[3];nompC-GAL4	LH+LH-NOMPC:GFP	7459.46	0.06975
w*;nompC[3],UAS-LH+LH-NompC::GFP/nompC[3];nompC-GAL4	LH+LH-NOMPC:GFP	7483.48	0.06975
w*;nompC[3],UAS-LH+LH-NompC::GFP/nompC[3];nompC-GAL4	LH+LH-NOMPC:GFP	7507.51	0.06976
w*;nompC[3],UAS-LH+LH-NompC::GFP/nompC[3];nompC-GAL4	LH+LH-NOMPC:GFP	7531.53	0.06976
w*;nompC[3],UAS-LH+LH-NompC::GFP/nompC[3];nompC-GAL4	LH+LH-NOMPC:GFP	7555.56	0.06977
w*;nompC[3],UAS-LH+LH-NompC::GFP/nompC[3];nompC-GAL4	LH+LH-NOMPC:GFP	7579.58	0.06977
w*;nompC[3],UAS-LH+LH-NompC::GFP/nompC[3];nompC-GAL4	LH+LH-NOMPC:GFP	7603.6	0.06977
w*;nompC[3],UAS-LH+LH-NompC::GFP/nompC[3];nompC-GAL4	LH+LH-NOMPC:GFP	7627.63	0.06978
w*;nompC[3],UAS-LH+LH-NompC::GFP/nompC[3];nompC-GAL4	LH+LH-NOMPC:GFP	7651.65	0.06978
w*;nompC[3],UAS-LH+LH-NompC::GFP/nompC[3];nompC-GAL4	LH+LH-NOMPC:GFP	7675.68	0.06979
w*;nompC[3],UAS-LH+LH-NompC::GFP/nompC[3];nompC-GAL4	LH+LH-NOMPC:GFP	7699.7	0.06979
w*;nompC[3],UAS-LH+LH-NompC::GFP/nompC[3];nompC-GAL4	LH+LH-NOMPC:GFP	7723.72	0.06979
w*;nompC[3],UAS-LH+LH-NompC::GFP/nompC[3];nompC-GAL4	LH+LH-NOMPC:GFP	7747.75	0.0698
w*;nompC[3],UAS-LH+LH-NompC::GFP/nompC[3];nompC-GAL4	LH+LH-NOMPC:GFP	7771.77	0.0698
w*;nompC[3],UAS-LH+LH-NompC::GFP/nompC[3];nompC-GAL4	LH+LH-NOMPC:GFP	7795.8	0.06981
w*;nompC[3],UAS-LH+LH-NompC::GFP/nompC[3];nompC-GAL4	LH+LH-NOMPC:GFP	7819.82	0.06981
w*;nompC[3],UAS-LH+LH-NompC::GFP/nompC[3];nompC-GAL4	LH+LH-NOMPC:GFP	7843.84	0.06981
w*;nompC[3],UAS-LH+LH-NompC::GFP/nompC[3];nompC-GAL4	LH+LH-NOMPC:GFP	7867.87	0.06982
w*;nompC[3],UAS-LH+LH-NompC::GFP/nompC[3];nompC-GAL4	LH+LH-NOMPC:GFP	7891.89	0.06982
w*;nompC[3],UAS-LH+LH-NompC::GFP/nompC[3];nompC-GAL4	LH+LH-NOMPC:GFP	7915.92	0.06982
w*;nompC[3],UAS-LH+LH-NompC::GFP/nompC[3];nompC-GAL4	LH+LH-NOMPC:GFP	7939.94	0.06983
w*;nompC[3],UAS-LH+LH-NompC::GFP/nompC[3];nompC-GAL4	LH+LH-NOMPC:GFP	7963.96	0.06983
w*;nompC[3],UAS-LH+LH-NompC::GFP/nompC[3];nompC-GAL4	LH+LH-NOMPC:GFP	7987.99	0.06983
w*;nompC[3],UAS-LH+LH-NompC::GFP/nompC[3];nompC-GAL4	LH+LH-NOMPC:GFP	8009.53	0.06983
w*;nompC[3],UAS-LH+LH-NompC::GFP/nompC[3];nompC-GAL4	LH+LH-NOMPC:GFP	8012.01	0.06984
w*;nompC[3],UAS-LH+LH-NompC::GFP/nompC[3];nompC-GAL4	LH+LH-NOMPC:GFP	8025.21	0.06984
w*;nompC[3],UAS-LH+LH-NompC::GFP/nompC[3];nompC-GAL4	LH+LH-NOMPC:GFP	8036.04	0.06984
w*;nompC[3],UAS-LH+LH-NompC::GFP/nompC[3];nompC-GAL4	LH+LH-NOMPC:GFP	8060.06	0.06984
w*;nompC[3],UAS-LH+LH-NompC::GFP/nompC[3];nompC-GAL4	LH+LH-NOMPC:GFP	8084.08	0.06984
w*;nompC[3],UAS-LH+LH-NompC::GFP/nompC[3];nompC-GAL4	LH+LH-NOMPC:GFP	8108.11	0.06985
w*;nompC[3],UAS-LH+LH-NompC::GFP/nompC[3];nompC-GAL4	LH+LH-NOMPC:GFP	8132.13	0.06985
w*;nompC[3],UAS-LH+LH-NompC::GFP/nompC[3];nompC-GAL4	LH+LH-NOMPC:GFP	8156.16	0.06985
w*;nompC[3],UAS-LH+LH-NompC::GFP/nompC[3];nompC-GAL4	LH+LH-NOMPC:GFP	8180.18	0.06986
w*;nompC[3],UAS-LH+LH-NompC::GFP/nompC[3];nompC-GAL4	LH+LH-NOMPC:GFP	8204.2	0.06986
w*;nompC[3],UAS-LH+LH-NompC::GFP/nompC[3];nompC-GAL4	LH+LH-NOMPC:GFP	8228.23	0.06986
w*;nompC[3],UAS-LH+LH-NompC::GFP/nompC[3];nompC-GAL4	LH+LH-NOMPC:GFP	8252.25	0.06986
w*;nompC[3],UAS-LH+LH-NompC::GFP/nompC[3];nompC-GAL4	LH+LH-NOMPC:GFP	8255.52	0.06986
w*;nompC[3],UAS-LH+LH-NompC::GFP/nompC[3];nompC-GAL4	LH+LH-NOMPC:GFP	8276.28	0.06987
w*;nompC[3],UAS-LH+LH-NompC::GFP/nompC[3];nompC-GAL4	LH+LH-NOMPC:GFP	8300.3	0.06987
w*;nompC[3],UAS-LH+LH-NompC::GFP/nompC[3];nompC-GAL4	LH+LH-NOMPC:GFP	8324.32	0.06987
w*;nompC[3],UAS-LH+LH-NompC::GFP/nompC[3];nompC-GAL4	LH+LH-NOMPC:GFP	8348.35	0.06987
w*;nompC[3],UAS-LH+LH-NompC::GFP/nompC[3];nompC-GAL4	LH+LH-NOMPC:GFP	8372.37	0.06988
w*;nompC[3],UAS-LH+LH-NompC::GFP/nompC[3];nompC-GAL4	LH+LH-NOMPC:GFP	8396.4	0.06988
w*;nompC[3],UAS-LH+LH-NompC::GFP/nompC[3];nompC-GAL4	LH+LH-NOMPC:GFP	8420.42	0.06988
w*;nompC[3],UAS-LH+LH-NompC::GFP/nompC[3];nompC-GAL4	LH+LH-NOMPC:GFP	8444.44	0.06988
w*;nompC[3],UAS-LH+LH-NompC::GFP/nompC[3];nompC-GAL4	LH+LH-NOMPC:GFP	8468.47	0.06988
w*;nompC[3],UAS-LH+LH-NompC::GFP/nompC[3];nompC-GAL4	LH+LH-NOMPC:GFP	8492.49	0.06989
w*;nompC[3],UAS-LH+LH-NompC::GFP/nompC[3];nompC-GAL4	LH+LH-NOMPC:GFP	8516.52	0.06989
w*;nompC[3],UAS-LH+LH-NompC::GFP/nompC[3];nompC-GAL4	LH+LH-NOMPC:GFP	8540.54	0.06989
w*;nompC[3],UAS-LH+LH-NompC::GFP/nompC[3];nompC-GAL4	LH+LH-NOMPC:GFP	8564.56	0.06989
w*;nompC[3],UAS-LH+LH-NompC::GFP/nompC[3];nompC-GAL4	LH+LH-NOMPC:GFP	8588.59	0.06989
w*;nompC[3],UAS-LH+LH-NompC::GFP/nompC[3];nompC-GAL4	LH+LH-NOMPC:GFP	8612.61	0.0699
w*;nompC[3],UAS-LH+LH-NompC::GFP/nompC[3];nompC-GAL4	LH+LH-NOMPC:GFP	8636.64	0.0699
w*;nompC[3],UAS-LH+LH-NompC::GFP/nompC[3];nompC-GAL4	LH+LH-NOMPC:GFP	8660.66	0.0699
w*;nompC[3],UAS-LH+LH-NompC::GFP/nompC[3];nompC-GAL4	LH+LH-NOMPC:GFP	8684.68	0.0699
w*;nompC[3],UAS-LH+LH-NompC::GFP/nompC[3];nompC-GAL4	LH+LH-NOMPC:GFP	8708.71	0.0699
w*;nompC[3],UAS-LH+LH-NompC::GFP/nompC[3];nompC-GAL4	LH+LH-NOMPC:GFP	8732.73	0.06991
w*;nompC[3],UAS-LH+LH-NompC::GFP/nompC[3];nompC-GAL4	LH+LH-NOMPC:GFP	8756.76	0.06991
w*;nompC[3],UAS-LH+LH-NompC::GFP/nompC[3];nompC-GAL4	LH+LH-NOMPC:GFP	8780.78	0.06991
w*;nompC[3],UAS-LH+LH-NompC::GFP/nompC[3];nompC-GAL4	LH+LH-NOMPC:GFP	8804.8	0.06991
w*;nompC[3],UAS-LH+LH-NompC::GFP/nompC[3];nompC-GAL4	LH+LH-NOMPC:GFP	8812.79	0.06991
w*;nompC[3],UAS-LH+LH-NompC::GFP/nompC[3];nompC-GAL4	LH+LH-NOMPC:GFP	8828.83	0.06991
w*;nompC[3],UAS-LH+LH-NompC::GFP/nompC[3];nompC-GAL4	LH+LH-NOMPC:GFP	8852.85	0.06991
w*;nompC[3],UAS-LH+LH-NompC::GFP/nompC[3];nompC-GAL4	LH+LH-NOMPC:GFP	8876.88	0.06992
w*;nompC[3],UAS-LH+LH-NompC::GFP/nompC[3];nompC-GAL4	LH+LH-NOMPC:GFP	8900.9	0.06992
w*;nompC[3],UAS-LH+LH-NompC::GFP/nompC[3];nompC-GAL4	LH+LH-NOMPC:GFP	8924.92	0.06992
w*;nompC[3],UAS-LH+LH-NompC::GFP/nompC[3];nompC-GAL4	LH+LH-NOMPC:GFP	8948.95	0.06992
w*;nompC[3],UAS-LH+LH-NompC::GFP/nompC[3];nompC-GAL4	LH+LH-NOMPC:GFP	8972.97	0.06992
w*;nompC[3],UAS-LH+LH-NompC::GFP/nompC[3];nompC-GAL4	LH+LH-NOMPC:GFP	8997	0.06992
w*;nompC[3],UAS-LH+LH-NompC::GFP/nompC[3];nompC-GAL4	LH+LH-NOMPC:GFP	9021.02	0.06992
w*;nompC[3],UAS-LH+LH-NompC::GFP/nompC[3];nompC-GAL4	LH+LH-NOMPC:GFP	9045.05	0.06993
w*;nompC[3],UAS-LH+LH-NompC::GFP/nompC[3];nompC-GAL4	LH+LH-NOMPC:GFP	9069.07	0.06993
w*;nompC[3],UAS-LH+LH-NompC::GFP/nompC[3];nompC-GAL4	LH+LH-NOMPC:GFP	9093.09	0.06993
w*;nompC[3],UAS-LH+LH-NompC::GFP/nompC[3];nompC-GAL4	LH+LH-NOMPC:GFP	9117.12	0.06993
w*;nompC[3],UAS-LH+LH-NompC::GFP/nompC[3];nompC-GAL4	LH+LH-NOMPC:GFP	9141.14	0.06993
w*;nompC[3],UAS-LH+LH-NompC::GFP/nompC[3];nompC-GAL4	LH+LH-NOMPC:GFP	9165.17	0.06993
w*;nompC[3],UAS-LH+LH-NompC::GFP/nompC[3];nompC-GAL4	LH+LH-NOMPC:GFP	9189.19	0.06993
w*;nompC[3],UAS-LH+LH-NompC::GFP/nompC[3];nompC-GAL4	LH+LH-NOMPC:GFP	9209.57	0.06994
w*;nompC[3],UAS-LH+LH-NompC::GFP/nompC[3];nompC-GAL4	LH+LH-NOMPC:GFP	9213.21	0.06994
w*;nompC[3],UAS-LH+LH-NompC::GFP/nompC[3];nompC-GAL4	LH+LH-NOMPC:GFP	9237.24	0.06994
w*;nompC[3],UAS-LH+LH-NompC::GFP/nompC[3];nompC-GAL4	LH+LH-NOMPC:GFP	9261.26	0.06994
w*;nompC[3],UAS-LH+LH-NompC::GFP/nompC[3];nompC-GAL4	LH+LH-NOMPC:GFP	9285.29	0.06994
w*;nompC[3],UAS-LH+LH-NompC::GFP/nompC[3];nompC-GAL4	LH+LH-NOMPC:GFP	9309.31	0.06994
w*;nompC[3],UAS-LH+LH-NompC::GFP/nompC[3];nompC-GAL4	LH+LH-NOMPC:GFP	9333.33	0.06994
w*;nompC[3],UAS-LH+LH-NompC::GFP/nompC[3];nompC-GAL4	LH+LH-NOMPC:GFP	9357.36	0.06994
w*;nompC[3],UAS-LH+LH-NompC::GFP/nompC[3];nompC-GAL4	LH+LH-NOMPC:GFP	9381.38	0.06994
w*;nompC[3],UAS-LH+LH-NompC::GFP/nompC[3];nompC-GAL4	LH+LH-NOMPC:GFP	9405.41	0.06994
w*;nompC[3],UAS-LH+LH-NompC::GFP/nompC[3];nompC-GAL4	LH+LH-NOMPC:GFP	9429.43	0.06995
w*;nompC[3],UAS-LH+LH-NompC::GFP/nompC[3];nompC-GAL4	LH+LH-NOMPC:GFP	9453.45	0.06995
w*;nompC[3],UAS-LH+LH-NompC::GFP/nompC[3];nompC-GAL4	LH+LH-NOMPC:GFP	9477.48	0.06995
w*;nompC[3],UAS-LH+LH-NompC::GFP/nompC[3];nompC-GAL4	LH+LH-NOMPC:GFP	9501.5	0.06995
w*;nompC[3],UAS-LH+LH-NompC::GFP/nompC[3];nompC-GAL4	LH+LH-NOMPC:GFP	9525.53	0.06995
w*;nompC[3],UAS-LH+LH-NompC::GFP/nompC[3];nompC-GAL4	LH+LH-NOMPC:GFP	9549.55	0.06995
w*;nompC[3],UAS-LH+LH-NompC::GFP/nompC[3];nompC-GAL4	LH+LH-NOMPC:GFP	9573.57	0.06995
w*;nompC[3],UAS-LH+LH-NompC::GFP/nompC[3];nompC-GAL4	LH+LH-NOMPC:GFP	9597.6	0.06995
w*;nompC[3],UAS-LH+LH-NompC::GFP/nompC[3];nompC-GAL4	LH+LH-NOMPC:GFP	9621.62	0.06995
w*;nompC[3],UAS-LH+LH-NompC::GFP/nompC[3];nompC-GAL4	LH+LH-NOMPC:GFP	9645.65	0.06995
w*;nompC[3],UAS-LH+LH-NompC::GFP/nompC[3];nompC-GAL4	LH+LH-NOMPC:GFP	9669.67	0.06995
w*;nompC[3],UAS-LH+LH-NompC::GFP/nompC[3];nompC-GAL4	LH+LH-NOMPC:GFP	9693.69	0.06996
w*;nompC[3],UAS-LH+LH-NompC::GFP/nompC[3];nompC-GAL4	LH+LH-NOMPC:GFP	9717.72	0.06996
w*;nompC[3],UAS-LH+LH-NompC::GFP/nompC[3];nompC-GAL4	LH+LH-NOMPC:GFP	9741.74	0.06996
w*;nompC[3],UAS-LH+LH-NompC::GFP/nompC[3];nompC-GAL4	LH+LH-NOMPC:GFP	9765.77	0.06996
w*;nompC[3],UAS-LH+LH-NompC::GFP/nompC[3];nompC-GAL4	LH+LH-NOMPC:GFP	9789.79	0.06996
w*;nompC[3],UAS-LH+LH-NompC::GFP/nompC[3];nompC-GAL4	LH+LH-NOMPC:GFP	9813.81	0.06996
w*;nompC[3],UAS-LH+LH-NompC::GFP/nompC[3];nompC-GAL4	LH+LH-NOMPC:GFP	9837.84	0.06996
w*;nompC[3],UAS-LH+LH-NompC::GFP/nompC[3];nompC-GAL4	LH+LH-NOMPC:GFP	9861.86	0.06996
w*;nompC[3],UAS-LH+LH-NompC::GFP/nompC[3];nompC-GAL4	LH+LH-NOMPC:GFP	9885.89	0.06996
w*;nompC[3],UAS-LH+LH-NompC::GFP/nompC[3];nompC-GAL4	LH+LH-NOMPC:GFP	9909.91	0.06996
w*;nompC[3],UAS-LH+LH-NompC::GFP/nompC[3];nompC-GAL4	LH+LH-NOMPC:GFP	9933.93	0.06996
w*;nompC[3],UAS-LH+LH-NompC::GFP/nompC[3];nompC-GAL4	LH+LH-NOMPC:GFP	9957.96	0.06996
w*;nompC[3],UAS-LH+LH-NompC::GFP/nompC[3];nompC-GAL4	LH+LH-NOMPC:GFP	9981.98	0.06996
w*;nompC[3],UAS-LH+LH-NompC::GFP/nompC[3];nompC-GAL4	LH+LH-NOMPC:GFP	10006	0.06997
w*;nompC[3],UAS-LH+LH-NompC::GFP/nompC[3];nompC-GAL4	LH+LH-NOMPC:GFP	10030	0.06997
w*;nompC[3],UAS-LH+LH-NompC::GFP/nompC[3];nompC-GAL4	LH+LH-NOMPC:GFP	10054.1	0.06997
w*;nompC[3],UAS-LH+LH-NompC::GFP/nompC[3];nompC-GAL4	LH+LH-NOMPC:GFP	10078.1	0.06997
w*;nompC[3],UAS-LH+LH-NompC::GFP/nompC[3];nompC-GAL4	LH+LH-NOMPC:GFP	10102.1	0.06997
w*;nompC[3],UAS-LH+LH-NompC::GFP/nompC[3];nompC-GAL4	LH+LH-NOMPC:GFP	10126.1	0.06997
w*;nompC[3],UAS-LH+LH-NompC::GFP/nompC[3];nompC-GAL4	LH+LH-NOMPC:GFP	10150.2	0.06997
w*;nompC[3],UAS-LH+LH-NompC::GFP/nompC[3];nompC-GAL4	LH+LH-NOMPC:GFP	10174.2	0.06997
w*;nompC[3],UAS-LH+LH-NompC::GFP/nompC[3];nompC-GAL4	LH+LH-NOMPC:GFP	10198.2	0.06997
w*;nompC[3],UAS-LH+LH-NompC::GFP/nompC[3];nompC-GAL4	LH+LH-NOMPC:GFP	10222.2	0.06997
w*;nompC[3],UAS-LH+LH-NompC::GFP/nompC[3];nompC-GAL4	LH+LH-NOMPC:GFP	10246.2	0.06997
w*;nompC[3],UAS-LH+LH-NompC::GFP/nompC[3];nompC-GAL4	LH+LH-NOMPC:GFP	10270.3	0.06997
w*;nompC[3],UAS-LH+LH-NompC::GFP/nompC[3];nompC-GAL4	LH+LH-NOMPC:GFP	10294.3	0.06997
w*;nompC[3],UAS-LH+LH-NompC::GFP/nompC[3];nompC-GAL4	LH+LH-NOMPC:GFP	10318.3	0.06997
w*;nompC[3],UAS-LH+LH-NompC::GFP/nompC[3];nompC-GAL4	LH+LH-NOMPC:GFP	10342.3	0.06997
w*;nompC[3],UAS-LH+LH-NompC::GFP/nompC[3];nompC-GAL4	LH+LH-NOMPC:GFP	10366.4	0.06997
w*;nompC[3],UAS-LH+LH-NompC::GFP/nompC[3];nompC-GAL4	LH+LH-NOMPC:GFP	10390.4	0.06997
w*;nompC[3],UAS-LH+LH-NompC::GFP/nompC[3];nompC-GAL4	LH+LH-NOMPC:GFP	10414.4	0.06997
w*;nompC[3],UAS-LH+LH-NompC::GFP/nompC[3];nompC-GAL4	LH+LH-NOMPC:GFP	10438.4	0.06998
w*;nompC[3],UAS-LH+LH-NompC::GFP/nompC[3];nompC-GAL4	LH+LH-NOMPC:GFP	11184.7	0.06999
w*;nompC[3],UAS-LH+LH-NompC::GFP/nompC[3];nompC-GAL4	LH+LH-NOMPC:GFP	11279.2	0.06999
w*;nompC[3],UAS-LH+LH-NompC::GFP/nompC[3];nompC-GAL4	LH+LH-NOMPC:GFP	11367.8	0.06999
w*;nompC[3],UAS-LH+LH-NompC::GFP/nompC[3];nompC-GAL4	LH+LH-NOMPC:GFP	11981.9	0.06999
[truncated: 2,001 more rows]

## Sheet: Fig_3_a_to_d_dyn
genotype_long	genotype	animal	displacement_nm	dynamic_stiffness_kappa_microN*m-1
w*;nompC[3],UAS-NompC::GFP/nompC[3];nompC-GAL4	NOMPC:GFP	1	11660.6	81.1834
w*;nompC[3],UAS-NompC::GFP/nompC[3];nompC-GAL4	NOMPC:GFP	1	5957.17	81.3845
w*;nompC[3],UAS-NompC::GFP/nompC[3];nompC-GAL4	NOMPC:GFP	1	3773.95	73.5721
w*;nompC[3],UAS-NompC::GFP/nompC[3];nompC-GAL4	NOMPC:GFP	1	2969.14	64.8666
w*;nompC[3],UAS-NompC::GFP/nompC[3];nompC-GAL4	NOMPC:GFP	1	2512.05	61.0915
w*;nompC[3],UAS-NompC::GFP/nompC[3];nompC-GAL4	NOMPC:GFP	1	2039.58	57.5628
w*;nompC[3],UAS-NompC::GFP/nompC[3];nompC-GAL4	NOMPC:GFP	1	1536.6	52.576
w*;nompC[3],UAS-NompC::GFP/nompC[3];nompC-GAL4	NOMPC:GFP	1	970.964	41.0681
w*;nompC[3],UAS-NompC::GFP/nompC[3];nompC-GAL4	NOMPC:GFP	1	543.03	31.9388
w*;nompC[3],UAS-NompC::GFP/nompC[3];nompC-GAL4	NOMPC:GFP	1	338.044	31.4888
w*;nompC[3],UAS-NompC::GFP/nompC[3];nompC-GAL4	NOMPC:GFP	1	211.034	28.4129
w*;nompC[3],UAS-NompC::GFP/nompC[3];nompC-GAL4	NOMPC:GFP	1	135.594	22.7234
w*;nompC[3],UAS-NompC::GFP/nompC[3];nompC-GAL4	NOMPC:GFP	1	60.0015	20.3505
w*;nompC[3],UAS-NompC::GFP/nompC[3];nompC-GAL4	NOMPC:GFP	1	-11.6567	20.072
w*;nompC[3],UAS-NompC::GFP/nompC[3];nompC-GAL4	NOMPC:GFP	1	-81.0026	19.4334
w*;nompC[3],UAS-NompC::GFP/nompC[3];nompC-GAL4	NOMPC:GFP	1	-211.824	25.2848
w*;nompC[3],UAS-NompC::GFP/nompC[3];nompC-GAL4	NOMPC:GFP	1	-428.055	30.7177
w*;nompC[3],UAS-NompC::GFP/nompC[3];nompC-GAL4	NOMPC:GFP	1	-870.889	39.9799
w*;nompC[3],UAS-NompC::GFP/nompC[3];nompC-GAL4	NOMPC:GFP	1	-1445.48	51.7384
w*;nompC[3],UAS-NompC::GFP/nompC[3];nompC-GAL4	NOMPC:GFP	1	-1935.52	60.2109
w*;nompC[3],UAS-NompC::GFP/nompC[3];nompC-GAL4	NOMPC:GFP	1	-2382.29	58.1632
w*;nompC[3],UAS-NompC::GFP/nompC[3];nompC-GAL4	NOMPC:GFP	1	-2812.83	63.7277
w*;nompC[3],UAS-NompC::GFP/nompC[3];nompC-GAL4	NOMPC:GFP	1	-3554.63	71.3584
w*;nompC[3],UAS-NompC::GFP/nompC[3];nompC-GAL4	NOMPC:GFP	1	-5546.47	77.1734
w*;nompC[3],UAS-NompC::GFP/nompC[3];nompC-GAL4	NOMPC:GFP	1	-7891.43	81.1834
w*;nompC[3],UAS-NompC::GFP/nompC[3];nompC-GAL4	NOMPC:GFP	1	-10465.2	81.0757
w*;nompC[3],UAS-NompC::GFP/nompC[3];nompC-GAL4	NOMPC:GFP	2	12489.1	80.4288
w*;nompC[3],UAS-NompC::GFP/nompC[3];nompC-GAL4	NOMPC:GFP	2	9053.27	79.5468
w*;nompC[3],UAS-NompC::GFP/nompC[3];nompC-GAL4	NOMPC:GFP	2	6243.91	80.5246
w*;nompC[3],UAS-NompC::GFP/nompC[3];nompC-GAL4	NOMPC:GFP	2	3895.12	73.1855
w*;nompC[3],UAS-NompC::GFP/nompC[3];nompC-GAL4	NOMPC:GFP	2	3049.3	68.2405
w*;nompC[3],UAS-NompC::GFP/nompC[3];nompC-GAL4	NOMPC:GFP	2	2588.19	63.2225
w*;nompC[3],UAS-NompC::GFP/nompC[3];nompC-GAL4	NOMPC:GFP	2	2093.64	60.0787
w*;nompC[3],UAS-NompC::GFP/nompC[3];nompC-GAL4	NOMPC:GFP	2	1565.82	53.8811
w*;nompC[3],UAS-NompC::GFP/nompC[3];nompC-GAL4	NOMPC:GFP	2	982.157	45.2667
w*;nompC[3],UAS-NompC::GFP/nompC[3];nompC-GAL4	NOMPC:GFP	2	541.164	35.343
w*;nompC[3],UAS-NompC::GFP/nompC[3];nompC-GAL4	NOMPC:GFP	2	328.807	32.9815
w*;nompC[3],UAS-NompC::GFP/nompC[3];nompC-GAL4	NOMPC:GFP	2	201.724	26.1937
w*;nompC[3],UAS-NompC::GFP/nompC[3];nompC-GAL4	NOMPC:GFP	2	129.783	26.4026
w*;nompC[3],UAS-NompC::GFP/nompC[3];nompC-GAL4	NOMPC:GFP	2	58.3123	20.4057
w*;nompC[3],UAS-NompC::GFP/nompC[3];nompC-GAL4	NOMPC:GFP	2	-10.5776	18.0175
w*;nompC[3],UAS-NompC::GFP/nompC[3];nompC-GAL4	NOMPC:GFP	2	-76.1218	21.77
w*;nompC[3],UAS-NompC::GFP/nompC[3];nompC-GAL4	NOMPC:GFP	2	-205.855	28.3303
w*;nompC[3],UAS-NompC::GFP/nompC[3];nompC-GAL4	NOMPC:GFP	2	-427.039	29.9275
w*;nompC[3],UAS-NompC::GFP/nompC[3];nompC-GAL4	NOMPC:GFP	2	-891.066	41.7439
w*;nompC[3],UAS-NompC::GFP/nompC[3];nompC-GAL4	NOMPC:GFP	2	-1497.51	53.5545
w*;nompC[3],UAS-NompC::GFP/nompC[3];nompC-GAL4	NOMPC:GFP	2	-2024.3	59.8428
w*;nompC[3],UAS-NompC::GFP/nompC[3];nompC-GAL4	NOMPC:GFP	2	-2503.91	60.779
w*;nompC[3],UAS-NompC::GFP/nompC[3];nompC-GAL4	NOMPC:GFP	2	-2959.78	64.0935
w*;nompC[3],UAS-NompC::GFP/nompC[3];nompC-GAL4	NOMPC:GFP	2	-3787.63	71.4761
w*;nompC[3],UAS-NompC::GFP/nompC[3];nompC-GAL4	NOMPC:GFP	2	-5966.93	79.313
w*;nompC[3],UAS-NompC::GFP/nompC[3];nompC-GAL4	NOMPC:GFP	2	-8534.86	81.3828
w*;nompC[3],UAS-NompC::GFP/nompC[3];nompC-GAL4	NOMPC:GFP	2	-11435.3	79.5468
w*;nompC[3],UAS-NompC::GFP/nompC[3];nompC-GAL4	NOMPC:GFP	3	11610.9	80.4416
w*;nompC[3],UAS-NompC::GFP/nompC[3];nompC-GAL4	NOMPC:GFP	3	8552.16	76.8645
w*;nompC[3],UAS-NompC::GFP/nompC[3];nompC-GAL4	NOMPC:GFP	3	5897.1	74.4214
w*;nompC[3],UAS-NompC::GFP/nompC[3];nompC-GAL4	NOMPC:GFP	3	3685.83	68.4331
w*;nompC[3],UAS-NompC::GFP/nompC[3];nompC-GAL4	NOMPC:GFP	3	2906.28	61.5473
w*;nompC[3],UAS-NompC::GFP/nompC[3];nompC-GAL4	NOMPC:GFP	3	2474.17	63.9794
w*;nompC[3],UAS-NompC::GFP/nompC[3];nompC-GAL4	NOMPC:GFP	3	1977.52	51.9472
w*;nompC[3],UAS-NompC::GFP/nompC[3];nompC-GAL4	NOMPC:GFP	3	1468.9	52.3702
w*;nompC[3],UAS-NompC::GFP/nompC[3];nompC-GAL4	NOMPC:GFP	3	934.25	44.519
w*;nompC[3],UAS-NompC::GFP/nompC[3];nompC-GAL4	NOMPC:GFP	3	524.417	35.9109
w*;nompC[3],UAS-NompC::GFP/nompC[3];nompC-GAL4	NOMPC:GFP	3	320.922	33.4999
w*;nompC[3],UAS-NompC::GFP/nompC[3];nompC-GAL4	NOMPC:GFP	3	195.99	28.6128
w*;nompC[3],UAS-NompC::GFP/nompC[3];nompC-GAL4	NOMPC:GFP	3	125.454	24.3575
w*;nompC[3],UAS-NompC::GFP/nompC[3];nompC-GAL4	NOMPC:GFP	3	50.5364	20.6806
w*;nompC[3],UAS-NompC::GFP/nompC[3];nompC-GAL4	NOMPC:GFP	3	-14.1471	18.2287
w*;nompC[3],UAS-NompC::GFP/nompC[3];nompC-GAL4	NOMPC:GFP	3	-73.6274	18.7004
w*;nompC[3],UAS-NompC::GFP/nompC[3];nompC-GAL4	NOMPC:GFP	3	-196.786	28.5049
w*;nompC[3],UAS-NompC::GFP/nompC[3];nompC-GAL4	NOMPC:GFP	3	-410.367	32.1259
w*;nompC[3],UAS-NompC::GFP/nompC[3];nompC-GAL4	NOMPC:GFP	3	-855.003	41.2131
w*;nompC[3],UAS-NompC::GFP/nompC[3];nompC-GAL4	NOMPC:GFP	3	-1420.98	54.0428
w*;nompC[3],UAS-NompC::GFP/nompC[3];nompC-GAL4	NOMPC:GFP	3	-1921.38	59.2067
w*;nompC[3],UAS-NompC::GFP/nompC[3];nompC-GAL4	NOMPC:GFP	3	-2376.45	57.4931
w*;nompC[3],UAS-NompC::GFP/nompC[3];nompC-GAL4	NOMPC:GFP	3	-2789.93	65.4883
w*;nompC[3],UAS-NompC::GFP/nompC[3];nompC-GAL4	NOMPC:GFP	3	-3541.72	67.9703
w*;nompC[3],UAS-NompC::GFP/nompC[3];nompC-GAL4	NOMPC:GFP	3	-5653.43	73.2454
w*;nompC[3],UAS-NompC::GFP/nompC[3];nompC-GAL4	NOMPC:GFP	3	-11008	80.4416
w*;nompC[3],UAS-NompC::GFP/nompC[3];nompC-GAL4	NOMPC:GFP	4	10934	73.8967
w*;nompC[3],UAS-NompC::GFP/nompC[3];nompC-GAL4	NOMPC:GFP	4	7995.69	76.6065
w*;nompC[3],UAS-NompC::GFP/nompC[3];nompC-GAL4	NOMPC:GFP	4	5471.65	75.0231
w*;nompC[3],UAS-NompC::GFP/nompC[3];nompC-GAL4	NOMPC:GFP	4	3381.72	70.0689
w*;nompC[3],UAS-NompC::GFP/nompC[3];nompC-GAL4	NOMPC:GFP	4	2637.25	67.8303
w*;nompC[3],UAS-NompC::GFP/nompC[3];nompC-GAL4	NOMPC:GFP	4	2230.91	64.673
w*;nompC[3],UAS-NompC::GFP/nompC[3];nompC-GAL4	NOMPC:GFP	4	1801.62	60.3807
w*;nompC[3],UAS-NompC::GFP/nompC[3];nompC-GAL4	NOMPC:GFP	4	1345.78	54.8216
w*;nompC[3],UAS-NompC::GFP/nompC[3];nompC-GAL4	NOMPC:GFP	4	836.553	45.3369
w*;nompC[3],UAS-NompC::GFP/nompC[3];nompC-GAL4	NOMPC:GFP	4	449.318	36.1548
w*;nompC[3],UAS-NompC::GFP/nompC[3];nompC-GAL4	NOMPC:GFP	4	263.492	32.4071
w*;nompC[3],UAS-NompC::GFP/nompC[3];nompC-GAL4	NOMPC:GFP	4	148.167	21.6963
w*;nompC[3],UAS-NompC::GFP/nompC[3];nompC-GAL4	NOMPC:GFP	4	80.0062	21.7385
w*;nompC[3],UAS-NompC::GFP/nompC[3];nompC-GAL4	NOMPC:GFP	4	1.57025	17.0667
w*;nompC[3],UAS-NompC::GFP/nompC[3];nompC-GAL4	NOMPC:GFP	4	-78.5499	18.1644
w*;nompC[3],UAS-NompC::GFP/nompC[3];nompC-GAL4	NOMPC:GFP	4	-149.392	26.4597
w*;nompC[3],UAS-NompC::GFP/nompC[3];nompC-GAL4	NOMPC:GFP	4	-262.94	32.3763
w*;nompC[3],UAS-NompC::GFP/nompC[3];nompC-GAL4	NOMPC:GFP	4	-448.016	33.2566
w*;nompC[3],UAS-NompC::GFP/nompC[3];nompC-GAL4	NOMPC:GFP	4	-833.854	46.8547
w*;nompC[3],UAS-NompC::GFP/nompC[3];nompC-GAL4	NOMPC:GFP	4	-1342.44	53.6734
w*;nompC[3],UAS-NompC::GFP/nompC[3];nompC-GAL4	NOMPC:GFP	4	-1799.59	60.4681
w*;nompC[3],UAS-NompC::GFP/nompC[3];nompC-GAL4	NOMPC:GFP	4	-2219.49	66.6756
w*;nompC[3],UAS-NompC::GFP/nompC[3];nompC-GAL4	NOMPC:GFP	4	-2616.01	67.6861
w*;nompC[3],UAS-NompC::GFP/nompC[3];nompC-GAL4	NOMPC:GFP	4	-3339.78	71.6472
w*;nompC[3],UAS-NompC::GFP/nompC[3];nompC-GAL4	NOMPC:GFP	4	-5320.47	76.0918
w*;nompC[3],UAS-NompC::GFP/nompC[3];nompC-GAL4	NOMPC:GFP	4	-7693.81	75.6772
w*;nompC[3],UAS-NompC::GFP/nompC[3];nompC-GAL4	NOMPC:GFP	4	-10416.2	73.8967
w*;nompC[3],UAS-NompC::GFP/nompC[3];nompC-GAL4	NOMPC:GFP	5	10493.5	79.2186
w*;nompC[3],UAS-NompC::GFP/nompC[3];nompC-GAL4	NOMPC:GFP	5	7740.35	78.9938
w*;nompC[3],UAS-NompC::GFP/nompC[3];nompC-GAL4	NOMPC:GFP	5	5360.39	74.8257
w*;nompC[3],UAS-NompC::GFP/nompC[3];nompC-GAL4	NOMPC:GFP	5	3380.4	67.3075
w*;nompC[3],UAS-NompC::GFP/nompC[3];nompC-GAL4	NOMPC:GFP	5	2650.33	60.5877
w*;nompC[3],UAS-NompC::GFP/nompC[3];nompC-GAL4	NOMPC:GFP	5	2250.38	62.7246
w*;nompC[3],UAS-NompC::GFP/nompC[3];nompC-GAL4	NOMPC:GFP	5	1832.62	53.4502
w*;nompC[3],UAS-NompC::GFP/nompC[3];nompC-GAL4	NOMPC:GFP	5	1369.8	47.3302
w*;nompC[3],UAS-NompC::GFP/nompC[3];nompC-GAL4	NOMPC:GFP	5	847.232	37.6022
w*;nompC[3],UAS-NompC::GFP/nompC[3];nompC-GAL4	NOMPC:GFP	5	449.389	29.9594
w*;nompC[3],UAS-NompC::GFP/nompC[3];nompC-GAL4	NOMPC:GFP	5	257.493	26.449
w*;nompC[3],UAS-NompC::GFP/nompC[3];nompC-GAL4	NOMPC:GFP	5	140.161	20.5084
w*;nompC[3],UAS-NompC::GFP/nompC[3];nompC-GAL4	NOMPC:GFP	5	73.578	15.6285
w*;nompC[3],UAS-NompC::GFP/nompC[3];nompC-GAL4	NOMPC:GFP	5	1.67175	16.3709
w*;nompC[3],UAS-NompC::GFP/nompC[3];nompC-GAL4	NOMPC:GFP	5	-70.165	17.1132
w*;nompC[3],UAS-NompC::GFP/nompC[3];nompC-GAL4	NOMPC:GFP	5	-137.838	19.1201
w*;nompC[3],UAS-NompC::GFP/nompC[3];nompC-GAL4	NOMPC:GFP	5	-255.768	25.7028
w*;nompC[3],UAS-NompC::GFP/nompC[3];nompC-GAL4	NOMPC:GFP	5	-448.563	30.1579
w*;nompC[3],UAS-NompC::GFP/nompC[3];nompC-GAL4	NOMPC:GFP	5	-830.979	40.5783
w*;nompC[3],UAS-NompC::GFP/nompC[3];nompC-GAL4	NOMPC:GFP	5	-1318.38	53.2595
w*;nompC[3],UAS-NompC::GFP/nompC[3];nompC-GAL4	NOMPC:GFP	5	-1740.39	57.1186
w*;nompC[3],UAS-NompC::GFP/nompC[3];nompC-GAL4	NOMPC:GFP	5	-2131.56	61.2852
w*;nompC[3],UAS-NompC::GFP/nompC[3];nompC-GAL4	NOMPC:GFP	5	-2514.97	60.4191
w*;nompC[3],UAS-NompC::GFP/nompC[3];nompC-GAL4	NOMPC:GFP	5	-3202.76	66.8034
w*;nompC[3],UAS-NompC::GFP/nompC[3];nompC-GAL4	NOMPC:GFP	5	-5049.1	71.8411
w*;nompC[3],UAS-NompC::GFP/nompC[3];nompC-GAL4	NOMPC:GFP	5	-7228.33	76.9836
w*;nompC[3],UAS-NompC::GFP/nompC[3];nompC-GAL4	NOMPC:GFP	5	-9617.15	79.2186
w*;nompC[3],UAS-LH+LH-NompC::GFP/nompC[3];nompC-GAL4	LH+LH-NOMPC:GFP	1	-12219.6	72.328
w*;nompC[3],UAS-LH+LH-NompC::GFP/nompC[3];nompC-GAL4	LH+LH-NOMPC:GFP	1	-8934.48	68.7587
w*;nompC[3],UAS-LH+LH-NompC::GFP/nompC[3];nompC-GAL4	LH+LH-NOMPC:GFP	1	-5930.32	68.5148
w*;nompC[3],UAS-LH+LH-NompC::GFP/nompC[3];nompC-GAL4	LH+LH-NOMPC:GFP	1	-3457.59	56.5754
w*;nompC[3],UAS-LH+LH-NompC::GFP/nompC[3];nompC-GAL4	LH+LH-NOMPC:GFP	1	-2586.94	62.4763
w*;nompC[3],UAS-LH+LH-NompC::GFP/nompC[3];nompC-GAL4	LH+LH-NOMPC:GFP	1	-2106.32	60.6871
w*;nompC[3],UAS-LH+LH-NompC::GFP/nompC[3];nompC-GAL4	LH+LH-NOMPC:GFP	1	-1631.61	58.685
w*;nompC[3],UAS-LH+LH-NompC::GFP/nompC[3];nompC-GAL4	LH+LH-NOMPC:GFP	1	-1145.97	58.6286
w*;nompC[3],UAS-LH+LH-NompC::GFP/nompC[3];nompC-GAL4	LH+LH-NOMPC:GFP	1	-650.465	55.5389
w*;nompC[3],UAS-LH+LH-NompC::GFP/nompC[3];nompC-GAL4	LH+LH-NOMPC:GFP	1	-311.115	56.2904
w*;nompC[3],UAS-LH+LH-NompC::GFP/nompC[3];nompC-GAL4	LH+LH-NOMPC:GFP	1	-172.463	51.9395
w*;nompC[3],UAS-LH+LH-NompC::GFP/nompC[3];nompC-GAL4	LH+LH-NOMPC:GFP	1	-99.8185	58.2889
w*;nompC[3],UAS-LH+LH-NompC::GFP/nompC[3];nompC-GAL4	LH+LH-NOMPC:GFP	1	-61.497	51.319
w*;nompC[3],UAS-LH+LH-NompC::GFP/nompC[3];nompC-GAL4	LH+LH-NOMPC:GFP	1	-26.982	56.048
w*;nompC[3],UAS-LH+LH-NompC::GFP/nompC[3];nompC-GAL4	LH+LH-NOMPC:GFP	1	4.64465	48.5273
w*;nompC[3],UAS-LH+LH-NompC::GFP/nompC[3];nompC-GAL4	LH+LH-NOMPC:GFP	1	34.8666	57.3456
w*;nompC[3],UAS-LH+LH-NompC::GFP/nompC[3];nompC-GAL4	LH+LH-NOMPC:GFP	1	100.317	54.7702
w*;nompC[3],UAS-LH+LH-NompC::GFP/nompC[3];nompC-GAL4	LH+LH-NOMPC:GFP	1	231.822	55.5239
w*;nompC[3],UAS-LH+LH-NompC::GFP/nompC[3];nompC-GAL4	LH+LH-NOMPC:GFP	1	571.616	56.6252
w*;nompC[3],UAS-LH+LH-NompC::GFP/nompC[3];nompC-GAL4	LH+LH-NOMPC:GFP	1	1072.71	57.5464
w*;nompC[3],UAS-LH+LH-NompC::GFP/nompC[3];nompC-GAL4	LH+LH-NOMPC:GFP	1	1558.46	61.8644
w*;nompC[3],UAS-LH+LH-NompC::GFP/nompC[3];nompC-GAL4	LH+LH-NOMPC:GFP	1	2031.86	63.1696
w*;nompC[3],UAS-LH+LH-NompC::GFP/nompC[3];nompC-GAL4	LH+LH-NOMPC:GFP	1	2500.76	64.3832
w*;nompC[3],UAS-LH+LH-NompC::GFP/nompC[3];nompC-GAL4	LH+LH-NOMPC:GFP	1	3376.98	64.8818
w*;nompC[3],UAS-LH+LH-NompC::GFP/nompC[3];nompC-GAL4	LH+LH-NOMPC:GFP	1	5843.45	68.9717
w*;nompC[3],UAS-LH+LH-NompC::GFP/nompC[3];nompC-GAL4	LH+LH-NOMPC:GFP	1	8812.79	76.204
w*;nompC[3],UAS-LH+LH-NompC::GFP/nompC[3];nompC-GAL4	LH+LH-NOMPC:GFP	1	11981.9	72.328
w*;nompC[3],UAS-LH+LH-NompC::GFP/nompC[3];nompC-GAL4	LH+LH-NOMPC:GFP	1	12842.1	72.312
w*;nompC[3],UAS-LH+LH-NompC::GFP/nompC[3];nompC-GAL4	LH+LH-NOMPC:GFP	2	9209.57	69.9805
w*;nompC[3],UAS-LH+LH-NompC::GFP/nompC[3];nompC-GAL4	LH+LH-NOMPC:GFP	2	6088.43	66.6974
w*;nompC[3],UAS-LH+LH-NompC::GFP/nompC[3];nompC-GAL4	LH+LH-NOMPC:GFP	2	3524.25	62.1592
w*;nompC[3],UAS-LH+LH-NompC::GFP/nompC[3];nompC-GAL4	LH+LH-NOMPC:GFP	2	2625.15	63.1092
w*;nompC[3],UAS-LH+LH-NompC::GFP/nompC[3];nompC-GAL4	LH+LH-NOMPC:GFP	2	2143.57	61.0786
w*;nompC[3],UAS-LH+LH-NompC::GFP/nompC[3];nompC-GAL4	LH+LH-NOMPC:GFP	2	1659.78	58.5283
w*;nompC[3],UAS-LH+LH-NompC::GFP/nompC[3];nompC-GAL4	LH+LH-NOMPC:GFP	2	1163.81	56.8352
w*;nompC[3],UAS-LH+LH-NompC::GFP/nompC[3];nompC-GAL4	LH+LH-NOMPC:GFP	2	659.289	52.8951
w*;nompC[3],UAS-LH+LH-NompC::GFP/nompC[3];nompC-GAL4	LH+LH-NOMPC:GFP	2	316.495	48.906
w*;nompC[3],UAS-LH+LH-NompC::GFP/nompC[3];nompC-GAL4	LH+LH-NOMPC:GFP	2	175.903	54.3403
w*;nompC[3],UAS-LH+LH-NompC::GFP/nompC[3];nompC-GAL4	LH+LH-NOMPC:GFP	2	101.394	49.1307
w*;nompC[3],UAS-LH+LH-NompC::GFP/nompC[3];nompC-GAL4	LH+LH-NOMPC:GFP	2	62.4007	55.1655
w*;nompC[3],UAS-LH+LH-NompC::GFP/nompC[3];nompC-GAL4	LH+LH-NOMPC:GFP	2	17.3744	49.0652
w*;nompC[3],UAS-LH+LH-NompC::GFP/nompC[3];nompC-GAL4	LH+LH-NOMPC:GFP	2	-36.7904	52.3593
w*;nompC[3],UAS-LH+LH-NompC::GFP/nompC[3];nompC-GAL4	LH+LH-NOMPC:GFP	2	-102.917	49.5885
w*;nompC[3],UAS-LH+LH-NompC::GFP/nompC[3];nompC-GAL4	LH+LH-NOMPC:GFP	2	-235.887	52.6986
w*;nompC[3],UAS-LH+LH-NompC::GFP/nompC[3];nompC-GAL4	LH+LH-NOMPC:GFP	2	-581.167	52.941
w*;nompC[3],UAS-LH+LH-NompC::GFP/nompC[3];nompC-GAL4	LH+LH-NOMPC:GFP	2	-1086.52	54.7529
w*;nompC[3],UAS-LH+LH-NompC::GFP/nompC[3];nompC-GAL4	LH+LH-NOMPC:GFP	2	-1578.59	58.9177
w*;nompC[3],UAS-LH+LH-NompC::GFP/nompC[3];nompC-GAL4	LH+LH-NOMPC:GFP	2	-2059.51	58.7097
w*;nompC[3],UAS-LH+LH-NompC::GFP/nompC[3];nompC-GAL4	LH+LH-NOMPC:GFP	2	-2524.91	62.0494
w*;nompC[3],UAS-LH+LH-NompC::GFP/nompC[3];nompC-GAL4	LH+LH-NOMPC:GFP	2	-3403.68	63.4336
w*;nompC[3],UAS-LH+LH-NompC::GFP/nompC[3];nompC-GAL4	LH+LH-NOMPC:GFP	2	-5856.95	69.1686
w*;nompC[3],UAS-LH+LH-NompC::GFP/nompC[3];nompC-GAL4	LH+LH-NOMPC:GFP	2	-8784.87	72.312
w*;nompC[3],UAS-LH+LH-NompC::GFP/nompC[3];nompC-GAL4	LH+LH-NOMPC:GFP	3	11184.7	68.6486
w*;nompC[3],UAS-LH+LH-NompC::GFP/nompC[3];nompC-GAL4	LH+LH-NOMPC:GFP	3	8009.53	68.8855
w*;nompC[3],UAS-LH+LH-NompC::GFP/nompC[3];nompC-GAL4	LH+LH-NOMPC:GFP	3	5290.41	65.9255
w*;nompC[3],UAS-LH+LH-NompC::GFP/nompC[3];nompC-GAL4	LH+LH-NOMPC:GFP	3	3065.02	62.5987
w*;nompC[3],UAS-LH+LH-NompC::GFP/nompC[3];nompC-GAL4	LH+LH-NOMPC:GFP	3	2281.91	59.0673
w*;nompC[3],UAS-LH+LH-NompC::GFP/nompC[3];nompC-GAL4	LH+LH-NOMPC:GFP	3	1863.55	57.6608
w*;nompC[3],UAS-LH+LH-NompC::GFP/nompC[3];nompC-GAL4	LH+LH-NOMPC:GFP	3	1445.64	56.6153
w*;nompC[3],UAS-LH+LH-NompC::GFP/nompC[3];nompC-GAL4	LH+LH-NOMPC:GFP	3	1012.69	53.9466
w*;nompC[3],UAS-LH+LH-NompC::GFP/nompC[3];nompC-GAL4	LH+LH-NOMPC:GFP	3	574.241	49.4697
w*;nompC[3],UAS-LH+LH-NompC::GFP/nompC[3];nompC-GAL4	LH+LH-NOMPC:GFP	3	276.838	48.9546
w*;nompC[3],UAS-LH+LH-NompC::GFP/nompC[3];nompC-GAL4	LH+LH-NOMPC:GFP	3	153.962	47.7935
w*;nompC[3],UAS-LH+LH-NompC::GFP/nompC[3];nompC-GAL4	LH+LH-NOMPC:GFP	3	88.6142	46.1476
w*;nompC[3],UAS-LH+LH-NompC::GFP/nompC[3];nompC-GAL4	LH+LH-NOMPC:GFP	3	54.5641	46.6195
w*;nompC[3],UAS-LH+LH-NompC::GFP/nompC[3];nompC-GAL4	LH+LH-NOMPC:GFP	3	24.0145	47.309
w*;nompC[3],UAS-LH+LH-NompC::GFP/nompC[3];nompC-GAL4	LH+LH-NOMPC:GFP	3	-4.46259	43.6499
w*;nompC[3],UAS-LH+LH-NompC::GFP/nompC[3];nompC-GAL4	LH+LH-NOMPC:GFP	3	-31.2768	43.2591
w*;nompC[3],UAS-LH+LH-NompC::GFP/nompC[3];nompC-GAL4	LH+LH-NOMPC:GFP	3	-89.3173	48.3073
w*;nompC[3],UAS-LH+LH-NompC::GFP/nompC[3];nompC-GAL4	LH+LH-NOMPC:GFP	3	-206.208	45.3063
w*;nompC[3],UAS-LH+LH-NompC::GFP/nompC[3];nompC-GAL4	LH+LH-NOMPC:GFP	3	-506.379	50.8999
w*;nompC[3],UAS-LH+LH-NompC::GFP/nompC[3];nompC-GAL4	LH+LH-NOMPC:GFP	3	-942.741	54.2464
w*;nompC[3],UAS-LH+LH-NompC::GFP/nompC[3];nompC-GAL4	LH+LH-NOMPC:GFP	3	-1362.24	58.9323
w*;nompC[3],UAS-LH+LH-NompC::GFP/nompC[3];nompC-GAL4	LH+LH-NOMPC:GFP	3	-1769.58	57.8702
w*;nompC[3],UAS-LH+LH-NompC::GFP/nompC[3];nompC-GAL4	LH+LH-NOMPC:GFP	3	-2167.94	61.2527
w*;nompC[3],UAS-LH+LH-NompC::GFP/nompC[3];nompC-GAL4	LH+LH-NOMPC:GFP	3	-2907.44	65.01
w*;nompC[3],UAS-LH+LH-NompC::GFP/nompC[3];nompC-GAL4	LH+LH-NOMPC:GFP	3	-4945.6	65.8282
w*;nompC[3],UAS-LH+LH-NompC::GFP/nompC[3];nompC-GAL4	LH+LH-NOMPC:GFP	3	-7356.76	66.2686
w*;nompC[3],UAS-LH+LH-NompC::GFP/nompC[3];nompC-GAL4	LH+LH-NOMPC:GFP	3	-10021.2	68.2737
w*;nompC[3],UAS-LH+LH-NompC::GFP/nompC[3];nompC-GAL4	LH+LH-NOMPC:GFP	4	11279.2	69.4082
w*;nompC[3],UAS-LH+LH-NompC::GFP/nompC[3];nompC-GAL4	LH+LH-NOMPC:GFP	4	8025.21	66.615
w*;nompC[3],UAS-LH+LH-NompC::GFP/nompC[3];nompC-GAL4	LH+LH-NOMPC:GFP	4	5294.41	63.8303
w*;nompC[3],UAS-LH+LH-NompC::GFP/nompC[3];nompC-GAL4	LH+LH-NOMPC:GFP	4	3067.89	60.9516
w*;nompC[3],UAS-LH+LH-NompC::GFP/nompC[3];nompC-GAL4	LH+LH-NOMPC:GFP	4	2255.93	60.8678
w*;nompC[3],UAS-LH+LH-NompC::GFP/nompC[3];nompC-GAL4	LH+LH-NOMPC:GFP	4	1827.3	56.5749
w*;nompC[3],UAS-LH+LH-NompC::GFP/nompC[3];nompC-GAL4	LH+LH-NOMPC:GFP	4	1407.8	59.9715
w*;nompC[3],UAS-LH+LH-NompC::GFP/nompC[3];nompC-GAL4	LH+LH-NOMPC:GFP	4	974.731	54.064
w*;nompC[3],UAS-LH+LH-NompC::GFP/nompC[3];nompC-GAL4	LH+LH-NOMPC:GFP	4	536.314	54.3094
w*;nompC[3],UAS-LH+LH-NompC::GFP/nompC[3];nompC-GAL4	LH+LH-NOMPC:GFP	4	235.824	47.135
w*;nompC[3],UAS-LH+LH-NompC::GFP/nompC[3];nompC-GAL4	LH+LH-NOMPC:GFP	4	117.942	57.0004
w*;nompC[3],UAS-LH+LH-NompC::GFP/nompC[3];nompC-GAL4	LH+LH-NOMPC:GFP	4	60.6361	58.4922
w*;nompC[3],UAS-LH+LH-NompC::GFP/nompC[3];nompC-GAL4	LH+LH-NOMPC:GFP	4	30.3765	51.3958
w*;nompC[3],UAS-LH+LH-NompC::GFP/nompC[3];nompC-GAL4	LH+LH-NOMPC:GFP	4	0.41683	42.4994
w*;nompC[3],UAS-LH+LH-NompC::GFP/nompC[3];nompC-GAL4	LH+LH-NOMPC:GFP	4	-29.4394	54.2386
w*;nompC[3],UAS-LH+LH-NompC::GFP/nompC[3];nompC-GAL4	LH+LH-NOMPC:GFP	4	-58.7155	49.8769
w*;nompC[3],UAS-LH+LH-NompC::GFP/nompC[3];nompC-GAL4	LH+LH-NOMPC:GFP	4	-116.537	56.7424
w*;nompC[3],UAS-LH+LH-NompC::GFP/nompC[3];nompC-GAL4	LH+LH-NOMPC:GFP	4	-234.4	53.4568
w*;nompC[3],UAS-LH+LH-NompC::GFP/nompC[3];nompC-GAL4	LH+LH-NOMPC:GFP	4	-531.198	54.1003
w*;nompC[3],UAS-LH+LH-NompC::GFP/nompC[3];nompC-GAL4	LH+LH-NOMPC:GFP	4	-963.905	56.1804
w*;nompC[3],UAS-LH+LH-NompC::GFP/nompC[3];nompC-GAL4	LH+LH-NOMPC:GFP	4	-1392.3	62.8716
w*;nompC[3],UAS-LH+LH-NompC::GFP/nompC[3];nompC-GAL4	LH+LH-NOMPC:GFP	4	-1809.77	58.4971
w*;nompC[3],UAS-LH+LH-NompC::GFP/nompC[3];nompC-GAL4	LH+LH-NOMPC:GFP	4	-2208.34	66.3302
w*;nompC[3],UAS-LH+LH-NompC::GFP/nompC[3];nompC-GAL4	LH+LH-NOMPC:GFP	4	-2951.87	65.6385
w*;nompC[3],UAS-LH+LH-NompC::GFP/nompC[3];nompC-GAL4	LH+LH-NOMPC:GFP	4	-5069.46	69.4082
w*;nompC[3],UAS-LH+LH-NompC::GFP/nompC[3];nompC-GAL4	LH+LH-NOMPC:GFP	5	11367.8	75.2867
w*;nompC[3],UAS-LH+LH-NompC::GFP/nompC[3];nompC-GAL4	LH+LH-NOMPC:GFP	5	8255.52	68.8639
w*;nompC[3],UAS-LH+LH-NompC::GFP/nompC[3];nompC-GAL4	LH+LH-NOMPC:GFP	5	5477.78	67.0105
w*;nompC[3],UAS-LH+LH-NompC::GFP/nompC[3];nompC-GAL4	LH+LH-NOMPC:GFP	5	3173.97	60.8858
w*;nompC[3],UAS-LH+LH-NompC::GFP/nompC[3];nompC-GAL4	LH+LH-NOMPC:GFP	5	2356.48	63.8877
w*;nompC[3],UAS-LH+LH-NompC::GFP/nompC[3];nompC-GAL4	LH+LH-NOMPC:GFP	5	1921.49	57.7096
w*;nompC[3],UAS-LH+LH-NompC::GFP/nompC[3];nompC-GAL4	LH+LH-NOMPC:GFP	5	1477.31	58.0548
w*;nompC[3],UAS-LH+LH-NompC::GFP/nompC[3];nompC-GAL4	LH+LH-NOMPC:GFP	5	1024.59	53.9175
w*;nompC[3],UAS-LH+LH-NompC::GFP/nompC[3];nompC-GAL4	LH+LH-NOMPC:GFP	5	565.789	53.7128
w*;nompC[3],UAS-LH+LH-NompC::GFP/nompC[3];nompC-GAL4	LH+LH-NOMPC:GFP	5	252.149	52.7765
w*;nompC[3],UAS-LH+LH-NompC::GFP/nompC[3];nompC-GAL4	LH+LH-NOMPC:GFP	5	128.041	49.6662
w*;nompC[3],UAS-LH+LH-NompC::GFP/nompC[3];nompC-GAL4	LH+LH-NOMPC:GFP	5	64.6784	50.3751
w*;nompC[3],UAS-LH+LH-NompC::GFP/nompC[3];nompC-GAL4	LH+LH-NOMPC:GFP	5	32.008	32.1074
w*;nompC[3],UAS-LH+LH-NompC::GFP/nompC[3];nompC-GAL4	LH+LH-NOMPC:GFP	5	0.07536	53.838
w*;nompC[3],UAS-LH+LH-NompC::GFP/nompC[3];nompC-GAL4	LH+LH-NOMPC:GFP	5	-31.9352	49.7215
w*;nompC[3],UAS-LH+LH-NompC::GFP/nompC[3];nompC-GAL4	LH+LH-NOMPC:GFP	5	-63.3968	54.7252
w*;nompC[3],UAS-LH+LH-NompC::GFP/nompC[3];nompC-GAL4	LH+LH-NOMPC:GFP	5	-126.421	51.5924
w*;nompC[3],UAS-LH+LH-NompC::GFP/nompC[3];nompC-GAL4	LH+LH-NOMPC:GFP	5	-251.761	52.3139
w*;nompC[3],UAS-LH+LH-NompC::GFP/nompC[3];nompC-GAL4	LH+LH-NOMPC:GFP	5	-566.405	54.0672
w*;nompC[3],UAS-LH+LH-NompC::GFP/nompC[3];nompC-GAL4	LH+LH-NOMPC:GFP	5	-1024.48	54.575
w*;nompC[3],UAS-LH+LH-NompC::GFP/nompC[3];nompC-GAL4	LH+LH-NOMPC:GFP	5	-1474.31	59.5117
w*;nompC[3],UAS-LH+LH-NompC::GFP/nompC[3];nompC-GAL4	LH+LH-NOMPC:GFP	5	-1915.59	60.6355
w*;nompC[3],UAS-LH+LH-NompC::GFP/nompC[3];nompC-GAL4	LH+LH-NOMPC:GFP	5	-2347.82	60.0506
w*;nompC[3],UAS-LH+LH-NompC::GFP/nompC[3];nompC-GAL4	LH+LH-NOMPC:GFP	5	-3153.51	62.8206
w*;nompC[3],UAS-LH+LH-NompC::GFP/nompC[3];nompC-GAL4	LH+LH-NOMPC:GFP	5	-5420.63	68.1738
w*;nompC[3],UAS-LH+LH-NompC::GFP/nompC[3];nompC-GAL4	LH+LH-NOMPC:GFP	5	-8156.93	71.2406
w*;nompC[1],UAS-AR+AR-NompC::GFP/nompC[3];nompC-GAL4	AR+AR-NOMPC:GFP	1	9187.76	75.4155
w*;nompC[1],UAS-AR+AR-NompC::GFP/nompC[3];nompC-GAL4	AR+AR-NOMPC:GFP	1	6840.61	73.3311
w*;nompC[1],UAS-AR+AR-NompC::GFP/nompC[3];nompC-GAL4	AR+AR-NOMPC:GFP	1	4722.27	70.6321
w*;nompC[1],UAS-AR+AR-NompC::GFP/nompC[3];nompC-GAL4	AR+AR-NOMPC:GFP	1	2931.8	64.345
w*;nompC[1],UAS-AR+AR-NompC::GFP/nompC[3];nompC-GAL4	AR+AR-NOMPC:GFP	1	2277.23	64.0916
w*;nompC[1],UAS-AR+AR-NompC::GFP/nompC[3];nompC-GAL4	AR+AR-NOMPC:GFP	1	1910.5	55.2475
w*;nompC[1],UAS-AR+AR-NompC::GFP/nompC[3];nompC-GAL4	AR+AR-NOMPC:GFP	1	1529.48	54.2849
w*;nompC[1],UAS-AR+AR-NompC::GFP/nompC[3];nompC-GAL4	AR+AR-NOMPC:GFP	1	1133.83	48.0364
w*;nompC[1],UAS-AR+AR-NompC::GFP/nompC[3];nompC-GAL4	AR+AR-NOMPC:GFP	1	701.673	42.6608
w*;nompC[1],UAS-AR+AR-NompC::GFP/nompC[3];nompC-GAL4	AR+AR-NOMPC:GFP	1	383.327	42.2797
w*;nompC[1],UAS-AR+AR-NompC::GFP/nompC[3];nompC-GAL4	AR+AR-NOMPC:GFP	1	232.54	37.4706
w*;nompC[1],UAS-AR+AR-NompC::GFP/nompC[3];nompC-GAL4	AR+AR-NOMPC:GFP	1	139.913	31.9809
w*;nompC[1],UAS-AR+AR-NompC::GFP/nompC[3];nompC-GAL4	AR+AR-NOMPC:GFP	1	87.9278	29.3825
w*;nompC[1],UAS-AR+AR-NompC::GFP/nompC[3];nompC-GAL4	AR+AR-NOMPC:GFP	1	39.0775	24.9947
w*;nompC[1],UAS-AR+AR-NompC::GFP/nompC[3];nompC-GAL4	AR+AR-NOMPC:GFP	1	-4.55045	30.2237
w*;nompC[1],UAS-AR+AR-NompC::GFP/nompC[3];nompC-GAL4	AR+AR-NOMPC:GFP	1	-47.5866	25.0287
w*;nompC[1],UAS-AR+AR-NompC::GFP/nompC[3];nompC-GAL4	AR+AR-NOMPC:GFP	1	-137.611	32.1015
w*;nompC[1],UAS-AR+AR-NompC::GFP/nompC[3];nompC-GAL4	AR+AR-NOMPC:GFP	1	-296.583	39.8896
w*;nompC[1],UAS-AR+AR-NompC::GFP/nompC[3];nompC-GAL4	AR+AR-NOMPC:GFP	1	-638.022	41.395
w*;nompC[1],UAS-AR+AR-NompC::GFP/nompC[3];nompC-GAL4	AR+AR-NOMPC:GFP	1	-1095.73	49.8213
w*;nompC[1],UAS-AR+AR-NompC::GFP/nompC[3];nompC-GAL4	AR+AR-NOMPC:GFP	1	-1514.08	53.8741
w*;nompC[1],UAS-AR+AR-NompC::GFP/nompC[3];nompC-GAL4	AR+AR-NOMPC:GFP	1	-1903.61	58.359
w*;nompC[1],UAS-AR+AR-NompC::GFP/nompC[3];nompC-GAL4	AR+AR-NOMPC:GFP	1	-2269.01	61.4288
w*;nompC[1],UAS-AR+AR-NompC::GFP/nompC[3];nompC-GAL4	AR+AR-NOMPC:GFP	1	-2973.25	64.6241
w*;nompC[1],UAS-AR+AR-NompC::GFP/nompC[3];nompC-GAL4	AR+AR-NOMPC:GFP	1	-4850.11	73.317
w*;nompC[1],UAS-AR+AR-NompC::GFP/nompC[3];nompC-GAL4	AR+AR-NOMPC:GFP	1	-7029.86	75.7342
w*;nompC[1],UAS-AR+AR-NompC::GFP/nompC[3];nompC-GAL4	AR+AR-NOMPC:GFP	1	-9514.6	75.4155
w*;nompC[1],UAS-AR+AR-NompC::GFP/nompC[3];nompC-GAL4	AR+AR-NOMPC:GFP	2	-8133.37	77.2683
w*;nompC[1],UAS-AR+AR-NompC::GFP/nompC[3];nompC-GAL4	AR+AR-NOMPC:GFP	2	-6102.92	74.7818
w*;nompC[1],UAS-AR+AR-NompC::GFP/nompC[3];nompC-GAL4	AR+AR-NOMPC:GFP	2	-4251.5	69.3229
w*;nompC[1],UAS-AR+AR-NompC::GFP/nompC[3];nompC-GAL4	AR+AR-NOMPC:GFP	2	-2673.17	63.1875
w*;nompC[1],UAS-AR+AR-NompC::GFP/nompC[3];nompC-GAL4	AR+AR-NOMPC:GFP	2	-2085.58	58.4173
w*;nompC[1],UAS-AR+AR-NompC::GFP/nompC[3];nompC-GAL4	AR+AR-NOMPC:GFP	2	-1760.34	53.8596
w*;nompC[1],UAS-AR+AR-NompC::GFP/nompC[3];nompC-GAL4	AR+AR-NOMPC:GFP	2	-1421.55	52.8953
w*;nompC[1],UAS-AR+AR-NompC::GFP/nompC[3];nompC-GAL4	AR+AR-NOMPC:GFP	2	-1056.78	47.9916
w*;nompC[1],UAS-AR+AR-NompC::GFP/nompC[3];nompC-GAL4	AR+AR-NOMPC:GFP	2	-660.154	45.2142
w*;nompC[1],UAS-AR+AR-NompC::GFP/nompC[3];nompC-GAL4	AR+AR-NOMPC:GFP	2	-365.9	45.1327
w*;nompC[1],UAS-AR+AR-NompC::GFP/nompC[3];nompC-GAL4	AR+AR-NOMPC:GFP	2	-222.453	37.8129
w*;nompC[1],UAS-AR+AR-NompC::GFP/nompC[3];nompC-GAL4	AR+AR-NOMPC:GFP	2	-132.621	28.693
w*;nompC[1],UAS-AR+AR-NompC::GFP/nompC[3];nompC-GAL4	AR+AR-NOMPC:GFP	2	-81.9775	27.1903
w*;nompC[1],UAS-AR+AR-NompC::GFP/nompC[3];nompC-GAL4	AR+AR-NOMPC:GFP	2	-36.4653	23.4502
w*;nompC[1],UAS-AR+AR-NompC::GFP/nompC[3];nompC-GAL4	AR+AR-NOMPC:GFP	2	5.81238	21.6528
w*;nompC[1],UAS-AR+AR-NompC::GFP/nompC[3];nompC-GAL4	AR+AR-NOMPC:GFP	2	46.9734	24.9261
w*;nompC[1],UAS-AR+AR-NompC::GFP/nompC[3];nompC-GAL4	AR+AR-NOMPC:GFP	2	130.869	29.0077
w*;nompC[1],UAS-AR+AR-NompC::GFP/nompC[3];nompC-GAL4	AR+AR-NOMPC:GFP	2	285.076	39.1118
w*;nompC[1],UAS-AR+AR-NompC::GFP/nompC[3];nompC-GAL4	AR+AR-NOMPC:GFP	2	600.708	47.5377
w*;nompC[1],UAS-AR+AR-NompC::GFP/nompC[3];nompC-GAL4	AR+AR-NOMPC:GFP	2	1005.99	49.2622
w*;nompC[1],UAS-AR+AR-NompC::GFP/nompC[3];nompC-GAL4	AR+AR-NOMPC:GFP	2	1374.77	50.3069
w*;nompC[1],UAS-AR+AR-NompC::GFP/nompC[3];nompC-GAL4	AR+AR-NOMPC:GFP	2	1722.75	57.6476
w*;nompC[1],UAS-AR+AR-NompC::GFP/nompC[3];nompC-GAL4	AR+AR-NOMPC:GFP	2	2057.27	58.3103
w*;nompC[1],UAS-AR+AR-NompC::GFP/nompC[3];nompC-GAL4	AR+AR-NOMPC:GFP	2	2663.87	62.5323
w*;nompC[1],UAS-AR+AR-NompC::GFP/nompC[3];nompC-GAL4	AR+AR-NOMPC:GFP	2	4340.82	71.8973
w*;nompC[1],UAS-AR+AR-NompC::GFP/nompC[3];nompC-GAL4	AR+AR-NOMPC:GFP	2	6354.88	74.8134
w*;nompC[1],UAS-AR+AR-NompC::GFP/nompC[3];nompC-GAL4	AR+AR-NOMPC:GFP	2	8662.52	77.2683
w*;nompC[1],UAS-AR+AR-NompC::GFP/nompC[3];nompC-GAL4	AR+AR-NOMPC:GFP	3	10203.6	81.2579
w*;nompC[1],UAS-AR+AR-NompC::GFP/nompC[3];nompC-GAL4	AR+AR-NOMPC:GFP	3	7566.86	82.5425
w*;nompC[1],UAS-AR+AR-NompC::GFP/nompC[3];nompC-GAL4	AR+AR-NOMPC:GFP	3	5255.16	79.7261
w*;nompC[1],UAS-AR+AR-NompC::GFP/nompC[3];nompC-GAL4	AR+AR-NOMPC:GFP	3	3304.91	70.2409
w*;nompC[1],UAS-AR+AR-NompC::GFP/nompC[3];nompC-GAL4	AR+AR-NOMPC:GFP	3	2580.4	62.5827
w*;nompC[1],UAS-AR+AR-NompC::GFP/nompC[3];nompC-GAL4	AR+AR-NOMPC:GFP	3	2182.24	66.2277
w*;nompC[1],UAS-AR+AR-NompC::GFP/nompC[3];nompC-GAL4	AR+AR-NOMPC:GFP	3	1765.33	56.9223
w*;nompC[1],UAS-AR+AR-NompC::GFP/nompC[3];nompC-GAL4	AR+AR-NOMPC:GFP	3	1307.32	52.7311
w*;nompC[1],UAS-AR+AR-NompC::GFP/nompC[3];nompC-GAL4	AR+AR-NOMPC:GFP	3	795.043	41.37
w*;nompC[1],UAS-AR+AR-NompC::GFP/nompC[3];nompC-GAL4	AR+AR-NOMPC:GFP	3	408.071	33.5536
w*;nompC[1],UAS-AR+AR-NompC::GFP/nompC[3];nompC-GAL4	AR+AR-NOMPC:GFP	3	225.663	32.5242
w*;nompC[1],UAS-AR+AR-NompC::GFP/nompC[3];nompC-GAL4	AR+AR-NOMPC:GFP	3	119.944	23.8989
w*;nompC[1],UAS-AR+AR-NompC::GFP/nompC[3];nompC-GAL4	AR+AR-NOMPC:GFP	3	61.925	17.8126
w*;nompC[1],UAS-AR+AR-NompC::GFP/nompC[3];nompC-GAL4	AR+AR-NOMPC:GFP	3	0.61811	23.2407
w*;nompC[1],UAS-AR+AR-NompC::GFP/nompC[3];nompC-GAL4	AR+AR-NOMPC:GFP	3	-62.6477	20.9347
w*;nompC[1],UAS-AR+AR-NompC::GFP/nompC[3];nompC-GAL4	AR+AR-NOMPC:GFP	3	-121.457	24.0816
w*;nompC[1],UAS-AR+AR-NompC::GFP/nompC[3];nompC-GAL4	AR+AR-NOMPC:GFP	3	-228.724	27.6715
w*;nompC[1],UAS-AR+AR-NompC::GFP/nompC[3];nompC-GAL4	AR+AR-NOMPC:GFP	3	-416.049	31.5065
w*;nompC[1],UAS-AR+AR-NompC::GFP/nompC[3];nompC-GAL4	AR+AR-NOMPC:GFP	3	-805.806	43.5154
w*;nompC[1],UAS-AR+AR-NompC::GFP/nompC[3];nompC-GAL4	AR+AR-NOMPC:GFP	3	-1320.17	47.3964
w*;nompC[1],UAS-AR+AR-NompC::GFP/nompC[3];nompC-GAL4	AR+AR-NOMPC:GFP	3	-1785.58	59.9714
w*;nompC[1],UAS-AR+AR-NompC::GFP/nompC[3];nompC-GAL4	AR+AR-NOMPC:GFP	3	-2216.9	59.9989
w*;nompC[1],UAS-AR+AR-NompC::GFP/nompC[3];nompC-GAL4	AR+AR-NOMPC:GFP	3	-2622.95	64.3638
w*;nompC[1],UAS-AR+AR-NompC::GFP/nompC[3];nompC-GAL4	AR+AR-NOMPC:GFP	3	-3363.86	67.5314
w*;nompC[1],UAS-AR+AR-NompC::GFP/nompC[3];nompC-GAL4	AR+AR-NOMPC:GFP	3	-5378.02	74.9781
w*;nompC[1],UAS-AR+AR-NompC::GFP/nompC[3];nompC-GAL4	AR+AR-NOMPC:GFP	3	-7771.22	79.2217
w*;nompC[1],UAS-AR+AR-NompC::GFP/nompC[3];nompC-GAL4	AR+AR-NOMPC:GFP	3	-10530.2	78.0851
w*;nompC[1],UAS-AR+AR-NompC::GFP/nompC[3];nompC-GAL4	AR+AR-NOMPC:GFP	4	10840.7	74.136
w*;nompC[1],UAS-AR+AR-NompC::GFP/nompC[3];nompC-GAL4	AR+AR-NOMPC:GFP	4	8015.41	76.1579
w*;nompC[1],UAS-AR+AR-NompC::GFP/nompC[3];nompC-GAL4	AR+AR-NOMPC:GFP	4	5555.91	74.5684
w*;nompC[1],UAS-AR+AR-NompC::GFP/nompC[3];nompC-GAL4	AR+AR-NOMPC:GFP	4	3478.69	69.7411
w*;nompC[1],UAS-AR+AR-NompC::GFP/nompC[3];nompC-GAL4	AR+AR-NOMPC:GFP	4	2712.73	62.6262
w*;nompC[1],UAS-AR+AR-NompC::GFP/nompC[3];nompC-GAL4	AR+AR-NOMPC:GFP	4	2291.7	60.3987
w*;nompC[1],UAS-AR+AR-NompC::GFP/nompC[3];nompC-GAL4	AR+AR-NOMPC:GFP	4	1852.1	59.8624
w*;nompC[1],UAS-AR+AR-NompC::GFP/nompC[3];nompC-GAL4	AR+AR-NOMPC:GFP	4	1380.69	52.3608
w*;nompC[1],UAS-AR+AR-NompC::GFP/nompC[3];nompC-GAL4	AR+AR-NOMPC:GFP	4	849.384	43.3952
w*;nompC[1],UAS-AR+AR-NompC::GFP/nompC[3];nompC-GAL4	AR+AR-NOMPC:GFP	4	445.442	37.9924
w*;nompC[1],UAS-AR+AR-NompC::GFP/nompC[3];nompC-GAL4	AR+AR-NOMPC:GFP	4	251.167	30.5339
w*;nompC[1],UAS-AR+AR-NompC::GFP/nompC[3];nompC-GAL4	AR+AR-NOMPC:GFP	4	133.966	26.24
w*;nompC[1],UAS-AR+AR-NompC::GFP/nompC[3];nompC-GAL4	AR+AR-NOMPC:GFP	4	69.1487	26.2191
w*;nompC[1],UAS-AR+AR-NompC::GFP/nompC[3];nompC-GAL4	AR+AR-NOMPC:GFP	4	1.06295	22.0423
w*;nompC[1],UAS-AR+AR-NompC::GFP/nompC[3];nompC-GAL4	AR+AR-NOMPC:GFP	4	-70.213	18.7429
w*;nompC[1],UAS-AR+AR-NompC::GFP/nompC[3];nompC-GAL4	AR+AR-NOMPC:GFP	4	-136.18	29.2805
w*;nompC[1],UAS-AR+AR-NompC::GFP/nompC[3];nompC-GAL4	AR+AR-NOMPC:GFP	4	-251.882	33.0873
w*;nompC[1],UAS-AR+AR-NompC::GFP/nompC[3];nompC-GAL4	AR+AR-NOMPC:GFP	4	-448.503	33.4763
w*;nompC[1],UAS-AR+AR-NompC::GFP/nompC[3];nompC-GAL4	AR+AR-NOMPC:GFP	4	-859.756	43.1626
w*;nompC[1],UAS-AR+AR-NompC::GFP/nompC[3];nompC-GAL4	AR+AR-NOMPC:GFP	4	-1402.35	51.0036
w*;nompC[1],UAS-AR+AR-NompC::GFP/nompC[3];nompC-GAL4	AR+AR-NOMPC:GFP	4	-1885.74	59.0032
w*;nompC[1],UAS-AR+AR-NompC::GFP/nompC[3];nompC-GAL4	AR+AR-NOMPC:GFP	4	-2339.93	58.588
w*;nompC[1],UAS-AR+AR-NompC::GFP/nompC[3];nompC-GAL4	AR+AR-NOMPC:GFP	4	-2776.88	66.1182
w*;nompC[1],UAS-AR+AR-NompC::GFP/nompC[3];nompC-GAL4	AR+AR-NOMPC:GFP	4	-3552.63	70.1569
w*;nompC[1],UAS-AR+AR-NompC::GFP/nompC[3];nompC-GAL4	AR+AR-NOMPC:GFP	4	-5635.22	77.1005
w*;nompC[1],UAS-AR+AR-NompC::GFP/nompC[3];nompC-GAL4	AR+AR-NOMPC:GFP	4	-8092.76	77.4618
w*;nompC[3]	nompC_KO		-14788	63.4269
w*;nompC[3]	nompC_KO		-13169.2	63.7832
w*;nompC[3]	nompC_KO		-12793.6	64.3742
w*;nompC[3]	nompC_KO		-12640	64.67
w*;nompC[3]	nompC_KO		-12630.9	65.873
w*;nompC[3]	nompC_KO		-12593.2	63.4339
w*;nompC[3]	nompC_KO		-12359.3	64.1123
w*;nompC[3]	nompC_KO		-12347.2	71.6167
w*;nompC[3]	nompC_KO		-12214.4	61.4804
w*;nompC[3]	nompC_KO		-12093.4	64.2457
w*;nompC[3]	nompC_KO		-12067.8	63.3995
w*;nompC[3]	nompC_KO		-11857.8	59.7229
w*;nompC[3]	nompC_KO		-11482.6	65.2273
w*;nompC[3]	nompC_KO		-11301.9	62.3807
w*;nompC[3]	nompC_KO		-11192.6	64.4464
w*;nompC[3]	nompC_KO		-10960.1	60.3219
w*;nompC[3]	nompC_KO		-10758.9	61.592
w*;nompC[3]	nompC_KO		-10709	63.4296
w*;nompC[3]	nompC_KO		-10285.6	64.4395
w*;nompC[3]	nompC_KO		-10250.7	64.3941
w*;nompC[3]	nompC_KO		-9961.08	61.5609
w*;nompC[3]	nompC_KO		-9418.95	65.2862
w*;nompC[3]	nompC_KO		-9306.7	61.3728
w*;nompC[3]	nompC_KO		-9114.07	62.0166
w*;nompC[3]	nompC_KO		-9109.12	62.293
w*;nompC[3]	nompC_KO		-9066.03	61.6453
w*;nompC[3]	nompC_KO		-9012.54	63.3079
w*;nompC[3]	nompC_KO		-8957.1	59.5152
w*;nompC[3]	nompC_KO		-8823.14	61.8244
w*;nompC[3]	nompC_KO		-8680.29	67.4758
w*;nompC[3]	nompC_KO		-8638.06	61.1078
w*;nompC[3]	nompC_KO		-8414.35	57.6421
w*;nompC[3]	nompC_KO		-8092.66	62.3738
w*;nompC[3]	nompC_KO		-8072.5	60.0534
w*;nompC[3]	nompC_KO		-8056.1	62.4618
w*;nompC[3]	nompC_KO		-8038.82	61.7145
w*;nompC[3]	nompC_KO		-7628.34	59.2195
w*;nompC[3]	nompC_KO		-7542.06	61.0986
w*;nompC[3]	nompC_KO		-7449.21	61.0787
w*;nompC[3]	nompC_KO		-7322.34	61.6193
w*;nompC[3]	nompC_KO		-7101.58	57.7621
w*;nompC[3]	nompC_KO		-7036.35	59.3281
w*;nompC[3]	nompC_KO		-6940.37	61.9314
w*;nompC[3]	nompC_KO		-6729.72	62.6679
w*;nompC[3]	nompC_KO		-6004.92	59.2115
w*;nompC[3]	nompC_KO		-6001.88	59.0481
w*;nompC[3]	nompC_KO		-5911.18	57.2424
w*;nompC[3]	nompC_KO		-5889.78	60.488
w*;nompC[3]	nompC_KO		-5888.22	59.8626
w*;nompC[3]	nompC_KO		-5740.78	59.4025
w*;nompC[3]	nompC_KO		-5646.07	59.0653
w*;nompC[3]	nompC_KO		-5622.35	63.6534
w*;nompC[3]	nompC_KO		-5590.42	59.1793
w*;nompC[3]	nompC_KO		-5443.95	55.8583
w*;nompC[3]	nompC_KO		-5338.55	59.9311
w*;nompC[3]	nompC_KO		-5271.41	60.2936
w*;nompC[3]	nompC_KO		-5242.95	57.8363
w*;nompC[3]	nompC_KO		-5173.05	59.5588
w*;nompC[3]	nompC_KO		-5023.51	59.4254
w*;nompC[3]	nompC_KO		-4926.49	56.9806
w*;nompC[3]	nompC_KO		-4913.32	59.0088
w*;nompC[3]	nompC_KO		-4858.44	58.9186
w*;nompC[3]	nompC_KO		-4748.48	59.0624
w*;nompC[3]	nompC_KO		-4532.39	57.1506
w*;nompC[3]	nompC_KO		-4373.17	59.8016
w*;nompC[3]	nompC_KO		-3951.84	54.4659
w*;nompC[3]	nompC_KO		-3859.74	58.6775
w*;nompC[3]	nompC_KO		-3393.27	54.8699
w*;nompC[3]	nompC_KO		-3375.88	53.5629
w*;nompC[3]	nompC_KO		-3349.56	55.7734
w*;nompC[3]	nompC_KO		-3312.23	56.5688
w*;nompC[3]	nompC_KO		-3272.76	56.6963
w*;nompC[3]	nompC_KO		-3228.13	55.6705
w*;nompC[3]	nompC_KO		-3156.81	57.9821
w*;nompC[3]	nompC_KO		-3096.86	55.8376
w*;nompC[3]	nompC_KO		-3085.17	55.5154
w*;nompC[3]	nompC_KO		-3084.78	54.8639
w*;nompC[3]	nompC_KO		-3044.59	53.3184
w*;nompC[3]	nompC_KO		-2942.63	54.7158
w*;nompC[3]	nompC_KO		-2901.75	52.8962
w*;nompC[3]	nompC_KO		-2885.73	55.1761
w*;nompC[3]	nompC_KO		-2780	55.9254
w*;nompC[3]	nompC_KO		-2741.93	53.8023
w*;nompC[3]	nompC_KO		-2736.53	55.677
w*;nompC[3]	nompC_KO		-2707.37	56.2505
w*;nompC[3]	nompC_KO		-2678.81	55.5854
w*;nompC[3]	nompC_KO		-2518.03	54.1208
w*;nompC[3]	nompC_KO		-2480.16	52.8283
w*;nompC[3]	nompC_KO		-2473.67	56.245
w*;nompC[3]	nompC_KO		-2467.69	51.7444
w*;nompC[3]	nompC_KO		-2450.27	54.1107
w*;nompC[3]	nompC_KO		-2401.35	53.8873
w*;nompC[3]	nompC_KO		-2397.15	54.8331
w*;nompC[3]	nompC_KO		-2390.77	54.9168
w*;nompC[3]	nompC_KO		-2362.27	51.8866
w*;nompC[3]	nompC_KO		-2300.16	55.5265
w*;nompC[3]	nompC_KO		-2288.6	53.3785
w*;nompC[3]	nompC_KO		-2251.72	54.0011
w*;nompC[3]	nompC_KO		-2230.49	55.6671
w*;nompC[3]	nompC_KO		-2222.75	52.2119
w*;nompC[3]	nompC_KO		-2217.83	52.6799
w*;nompC[3]	nompC_KO		-2160.55	53.3537
w*;nompC[3]	nompC_KO		-2117.33	53.1557
w*;nompC[3]	nompC_KO		-2025.7	51.6249
w*;nompC[3]	nompC_KO		-2012.37	50.5989
w*;nompC[3]	nompC_KO		-2002.5	52.6174
w*;nompC[3]	nompC_KO		-2001.62	54.1683
w*;nompC[3]	nompC_KO		-1984.2	54.1424
w*;nompC[3]	nompC_KO		-1982.65	53.1788
w*;nompC[3]	nompC_KO		-1967.5	54.7582
w*;nompC[3]	nompC_KO		-1954.37	54.1521
w*;nompC[3]	nompC_KO		-1946.93	53.8696
w*;nompC[3]	nompC_KO		-1939.07	53.0648
w*;nompC[3]	nompC_KO		-1933.82	53.9796
w*;nompC[3]	nompC_KO		-1901.12	54.4355
w*;nompC[3]	nompC_KO		-1851.51	52.8287
w*;nompC[3]	nompC_KO		-1848.83	52.7658
w*;nompC[3]	nompC_KO		-1829.35	53.4168
w*;nompC[3]	nompC_KO		-1820.65	54.8726
w*;nompC[3]	nompC_KO		-1817.84	51.6218
w*;nompC[3]	nompC_KO		-1791.83	51.5368
w*;nompC[3]	nompC_KO		-1784.55	50.9603
w*;nompC[3]	nompC_KO		-1753.18	52.6336
w*;nompC[3]	nompC_KO		-1735.39	52.2104
w*;nompC[3]	nompC_KO		-1631.04	53.7311
w*;nompC[3]	nompC_KO		-1630.59	51.8945
w*;nompC[3]	nompC_KO		-1622.89	53.3176
w*;nompC[3]	nompC_KO		-1605.95	54.0337
w*;nompC[3]	nompC_KO		-1592.42	53.4161
w*;nompC[3]	nompC_KO		-1588.56	53.2414
w*;nompC[3]	nompC_KO		-1555.59	50.4146
w*;nompC[3]	nompC_KO		-1541.86	49.3152
w*;nompC[3]	nompC_KO		-1516.45	52.2719
w*;nompC[3]	nompC_KO		-1502.04	51.9519
w*;nompC[3]	nompC_KO		-1486.51	52.5356
w*;nompC[3]	nompC_KO		-1483.24	53.8798
w*;nompC[3]	nompC_KO		-1480.98	52.6199
w*;nompC[3]	nompC_KO		-1472.31	51.6207
w*;nompC[3]	nompC_KO		-1432.85	52.5806
w*;nompC[3]	nompC_KO		-1414.16	51.8511
w*;nompC[3]	nompC_KO		-1406.82	50.3549
w*;nompC[3]	nompC_KO		-1394.71	52.3085
w*;nompC[3]	nompC_KO		-1363.98	50.2837
w*;nompC[3]	nompC_KO		-1350.15	51.6756
w*;nompC[3]	nompC_KO		-1341.97	50.9725
w*;nompC[3]	nompC_KO		-1264.78	52.9521
w*;nompC[3]	nompC_KO		-1250.58	51.072
w*;nompC[3]	nompC_KO		-1243.73	52.1687
w*;nompC[3]	nompC_KO		-1224.95	52.4952
w*;nompC[3]	nompC_KO		-1224.27	52.7428
w*;nompC[3]	nompC_KO		-1212.75	52.6653
w*;nompC[3]	nompC_KO		-1208.62	49.5824
w*;nompC[3]	nompC_KO		-1148.87	51.2426
w*;nompC[3]	nompC_KO		-1143.86	52.7387
w*;nompC[3]	nompC_KO		-1077.18	48.0688
w*;nompC[3]	nompC_KO		-1048.3	51.2233
w*;nompC[3]	nompC_KO		-1047.73	47.6407
w*;nompC[3]	nompC_KO		-1034.83	51.0071
w*;nompC[3]	nompC_KO		-1031.25	49.8353
w*;nompC[3]	nompC_KO		-1006.94	51.0883
w*;nompC[3]	nompC_KO		-979.127	50.9477
w*;nompC[3]	nompC_KO		-974.606	50.6035
w*;nompC[3]	nompC_KO		-966.219	49.5864
w*;nompC[3]	nompC_KO		-952.959	50.6209
w*;nompC[3]	nompC_KO		-939.637	48.7791
w*;nompC[3]	nompC_KO		-932.209	50.5767
w*;nompC[3]	nompC_KO		-925.645	49.2413
w*;nompC[3]	nompC_KO		-920.377	51.6383
w*;nompC[3]	nompC_KO		-868.434	50.119
w*;nompC[3]	nompC_KO		-858.658	50.9264
w*;nompC[3]	nompC_KO		-850.467	51.4418
w*;nompC[3]	nompC_KO		-847.09	51.7794
w*;nompC[3]	nompC_KO		-844.317	51.8434
w*;nompC[3]	nompC_KO		-799.132	51.7254
w*;nompC[3]	nompC_KO		-795.733	50.8824
w*;nompC[3]	nompC_KO		-664.668	48.0151
w*;nompC[3]	nompC_KO		-643.384	50.6157
w*;nompC[3]	nompC_KO		-592.617	45.8643
w*;nompC[3]	nompC_KO		-579.865	49.6055
w*;nompC[3]	nompC_KO		-575.853	50.2974
w*;nompC[3]	nompC_KO		-565.939	48.5792
w*;nompC[3]	nompC_KO		-565.682	45.8633
w*;nompC[3]	nompC_KO		-545.873	49.8642
w*;nompC[3]	nompC_KO		-544.932	49.9675
w*;nompC[3]	nompC_KO		-537.679	50.175
w*;nompC[3]	nompC_KO		-535.82	49.2636
w*;nompC[3]	nompC_KO		-516.892	47.6591
w*;nompC[3]	nompC_KO		-513.502	49.8147
w*;nompC[3]	nompC_KO		-512.107	47.7494
w*;nompC[3]	nompC_KO		-508.128	48.2958
w*;nompC[3]	nompC_KO		-481.275	49.2093
w*;nompC[3]	nompC_KO		-474.743	51.4618
w*;nompC[3]	nompC_KO		-472.823	50.2266
w*;nompC[3]	nompC_KO		-471.908	49.7272
w*;nompC[3]	nompC_KO		-449.806	50.847
w*;nompC[3]	nompC_KO		-449.606	50.5153
w*;nompC[3]	nompC_KO		-431.623	50.4494
w*;nompC[3]	nompC_KO		-358.009	49.4888
w*;nompC[3]	nompC_KO		-280.233	47.4994
w*;nompC[3]	nompC_KO		-264.856	45.9629
w*;nompC[3]	nompC_KO		-256.576	48.3567
w*;nompC[3]	nompC_KO		-253.33	49.7797
w*;nompC[3]	nompC_KO		-243.758	45.4783
w*;nompC[3]	nompC_KO		-241.715	49.7515
w*;nompC[3]	nompC_KO		-240.731	48.1548
w*;nompC[3]	nompC_KO		-237.973	48.7154
w*;nompC[3]	nompC_KO		-233.372	48.8482
w*;nompC[3]	nompC_KO		-230.558	47.2078
w*;nompC[3]	nompC_KO		-229.798	51.2112
w*;nompC[3]	nompC_KO		-226.449	49.0829
w*;nompC[3]	nompC_KO		-223.153	46.9398
w*;nompC[3]	nompC_KO		-216.016	51.3637
w*;nompC[3]	nompC_KO		-213.398	45.949
w*;nompC[3]	nompC_KO		-212.089	49.0374
w*;nompC[3]	nompC_KO		-210.404	48.1942
w*;nompC[3]	nompC_KO		-207.141	48.9908
w*;nompC[3]	nompC_KO		-198.796	49.3514
w*;nompC[3]	nompC_KO		-198.703	49.1087
w*;nompC[3]	nompC_KO		-188.63	49.4467
w*;nompC[3]	nompC_KO		-154.923	48.408
w*;nompC[3]	nompC_KO		-138.852	46.5391
w*;nompC[3]	nompC_KO		-131.437	48.6724
w*;nompC[3]	nompC_KO		-129.439	50.0266
w*;nompC[3]	nompC_KO		-128.081	48.0273
w*;nompC[3]	nompC_KO		-124.544	50.3029
w*;nompC[3]	nompC_KO		-123.838	50.6247
w*;nompC[3]	nompC_KO		-118.512	47.8954
w*;nompC[3]	nompC_KO		-117.962	48.3883
w*;nompC[3]	nompC_KO		-117.787	46.6542
w*;nompC[3]	nompC_KO		-117.137	47.9245
w*;nompC[3]	nompC_KO		-112.735	48.096
w*;nompC[3]	nompC_KO		-111.51	46.4222
w*;nompC[3]	nompC_KO		-110.907	46.696
w*;nompC[3]	nompC_KO		-109.388	49.2359
w*;nompC[3]	nompC_KO		-109.049	50.8745
w*;nompC[3]	nompC_KO		-108.777	48.6967
w*;nompC[3]	nompC_KO		-104.925	48.738
w*;nompC[3]	nompC_KO		-104.172	46.3417
w*;nompC[3]	nompC_KO		-102.496	48.4171
w*;nompC[3]	nompC_KO		-97.7273	49.8567
w*;nompC[3]	nompC_KO		-95.0599	48.0646
w*;nompC[3]	nompC_KO		-71.6158	47.4225
w*;nompC[3]	nompC_KO		-70.9104	48.0021
w*;nompC[3]	nompC_KO		-70.8226	47.3652
w*;nompC[3]	nompC_KO		-70.1202	49.143
w*;nompC[3]	nompC_KO		-69.687	51.9764
w*;nompC[3]	nompC_KO		-69.5447	48.1628
w*;nompC[3]	nompC_KO		-69.4477	51.1682
w*;nompC[3]	nompC_KO		-68.2475	50.6932
w*;nompC[3]	nompC_KO		-63.8579	46.6973
w*;nompC[3]	nompC_KO		-61.7725	47.239
w*;nompC[3]	nompC_KO		-60.1778	49.2545
w*;nompC[3]	nompC_KO		-59.8097	48.6381
w*;nompC[3]	nompC_KO		-59.0793	46.384
w*;nompC[3]	nompC_KO		-57.8294	49.0782
w*;nompC[3]	nompC_KO		-57.585	47.5091
w*;nompC[3]	nompC_KO		-56.918	48.3397
w*;nompC[3]	nompC_KO		-54.9908	47.419
w*;nompC[3]	nompC_KO		-54.1649	45.3336
w*;nompC[3]	nompC_KO		-52.9113	49.8289
w*;nompC[3]	nompC_KO		-51.4049	41.8484
w*;nompC[3]	nompC_KO		-49.573	44.4343
w*;nompC[3]	nompC_KO		-41.9173	50.2949
w*;nompC[3]	nompC_KO		-40.3342	45.4787
w*;nompC[3]	nompC_KO		-39.4386	46.3151
w*;nompC[3]	nompC_KO		-37.8557	48.2041
w*;nompC[3]	nompC_KO		-37.0189	49.461
w*;nompC[3]	nompC_KO		-36.2931	51.1567
w*;nompC[3]	nompC_KO		-36.0379	42.6218
w*;nompC[3]	nompC_KO		-35.8466	50.5719
w*;nompC[3]	nompC_KO		-34.5108	45.1077
w*;nompC[3]	nompC_KO		-34.1749	40.6337
w*;nompC[3]	nompC_KO		-33.0505	49.0288
w*;nompC[3]	nompC_KO		-31.7159	47.376
w*;nompC[3]	nompC_KO		-31.1908	45.8886
w*;nompC[3]	nompC_KO		-30.9675	45.8064
w*;nompC[3]	nompC_KO		-29.5377	45.4124
w*;nompC[3]	nompC_KO		-29.4134	44.4431
w*;nompC[3]	nompC_KO		-28.6613	46.6729
w*;nompC[3]	nompC_KO		-28.3647	47.4787
w*;nompC[3]	nompC_KO		-25.7031	47.4164
w*;nompC[3]	nompC_KO		-25.2374	50.686
w*;nompC[3]	nompC_KO		-23.7075	49.5792
w*;nompC[3]	nompC_KO		-13.124	41.4105
w*;nompC[3]	nompC_KO		-5.36479	48.2302
w*;nompC[3]	nompC_KO		-4.16599	48.1763
w*;nompC[3]	nompC_KO		-3.62872	40.3932
w*;nompC[3]	nompC_KO		-2.7081	51.3058
w*;nompC[3]	nompC_KO		0.35236	44.2499
w*;nompC[3]	nompC_KO		6.30478	48.7201
w*;nompC[3]	nompC_KO		11.1673	49.893
w*;nompC[3]	nompC_KO		15.7437	40.7255
w*;nompC[3]	nompC_KO		17.3455	45.8587
w*;nompC[3]	nompC_KO		19.1714	46.4085
w*;nompC[3]	nompC_KO		21.2071	53.7045
w*;nompC[3]	nompC_KO		21.8216	43.6044
w*;nompC[3]	nompC_KO		23.0148	45.8065
w*;nompC[3]	nompC_KO		23.343	48.6451
w*;nompC[3]	nompC_KO		23.8903	46.2953
w*;nompC[3]	nompC_KO		24.3276	46.5376
w*;nompC[3]	nompC_KO		24.3911	49.605
w*;nompC[3]	nompC_KO		24.5698	47.8151
w*;nompC[3]	nompC_KO		29.856	49.1443
w*;nompC[3]	nompC_KO		31.3516	47.4222
w*;nompC[3]	nompC_KO		33.9422	49.0664
w*;nompC[3]	nompC_KO		36.0635	47.7667
w*;nompC[3]	nompC_KO		40.3125	46.6648
w*;nompC[3]	nompC_KO		40.7879	44.8102
w*;nompC[3]	nompC_KO		41.4181	43.7538
w*;nompC[3]	nompC_KO		44.2075	48.4453
w*;nompC[3]	nompC_KO		44.5555	52.4825
w*;nompC[3]	nompC_KO		44.7567	44.9265
w*;nompC[3]	nompC_KO		44.7645	47.2549
w*;nompC[3]	nompC_KO		49.3014	48.1014
w*;nompC[3]	nompC_KO		49.9331	47.9536
w*;nompC[3]	nompC_KO		50.0221	47.2453
w*;nompC[3]	nompC_KO		52.0785	47.6569
w*;nompC[3]	nompC_KO		52.4504	46.1513
w*;nompC[3]	nompC_KO		53.1105	44.791
w*;nompC[3]	nompC_KO		54.7274	45.7536
w*;nompC[3]	nompC_KO		55.8899	46.8804
w*;nompC[3]	nompC_KO		56.3276	46.9599
w*;nompC[3]	nompC_KO		58.7112	48.1528
w*;nompC[3]	nompC_KO		59.4241	48.3162
w*;nompC[3]	nompC_KO		59.9241	49.0843
w*;nompC[3]	nompC_KO		60.8608	41.9396
w*;nompC[3]	nompC_KO		65.6501	48.3205
w*;nompC[3]	nompC_KO		68.9972	53.38
w*;nompC[3]	nompC_KO		72.8573	52.4338
w*;nompC[3]	nompC_KO		75.4944	47.1749
w*;nompC[3]	nompC_KO		76.4168	45.19
w*;nompC[3]	nompC_KO		79.8211	49.3834
w*;nompC[3]	nompC_KO		81.1339	48.065
w*;nompC[3]	nompC_KO		87.2891	48.2055
w*;nompC[3]	nompC_KO		91.9877	48.7081
w*;nompC[3]	nompC_KO		93.8566	48.8095
w*;nompC[3]	nompC_KO		95.3165	49.9907
w*;nompC[3]	nompC_KO		97.197	47.9606
w*;nompC[3]	nompC_KO		100.108	48.2132
w*;nompC[3]	nompC_KO		100.582	49.6413
w*;nompC[3]	nompC_KO		105.621	45.4456
w*;nompC[3]	nompC_KO		109.504	47.3783
w*;nompC[3]	nompC_KO		113.203	50.1907
w*;nompC[3]	nompC_KO		113.377	48.3514
w*;nompC[3]	nompC_KO		113.63	48.9199
w*;nompC[3]	nompC_KO		118.901	47.4439
w*;nompC[3]	nompC_KO		119.197	46.8771
w*;nompC[3]	nompC_KO		124.327	45.7233
w*;nompC[3]	nompC_KO		126.939	51.8822
w*;nompC[3]	nompC_KO		130.421	45.6079
w*;nompC[3]	nompC_KO		132.588	48.6924
w*;nompC[3]	nompC_KO		136.788	47.4562
w*;nompC[3]	nompC_KO		137.924	45.5607
w*;nompC[3]	nompC_KO		142.549	47.2213
w*;nompC[3]	nompC_KO		150.796	46.7268
w*;nompC[3]	nompC_KO		188.368	48.85
w*;nompC[3]	nompC_KO		190.6	50.2026
w*;nompC[3]	nompC_KO		194.167	48.7184
w*;nompC[3]	nompC_KO		199.609	50.2298
w*;nompC[3]	nompC_KO		201.574	47.6328
w*;nompC[3]	nompC_KO		202.941	48.9735
w*;nompC[3]	nompC_KO		206.069	48.4242
w*;nompC[3]	nompC_KO		218.827	46.8743
w*;nompC[3]	nompC_KO		218.926	48.4486
w*;nompC[3]	nompC_KO		231.131	48.9542
w*;nompC[3]	nompC_KO		232.826	49.53
w*;nompC[3]	nompC_KO		233.183	48.7973
w*;nompC[3]	nompC_KO		234.751	46.1152
w*;nompC[3]	nompC_KO		237.538	48.2231
w*;nompC[3]	nompC_KO		247.138	48.1692
w*;nompC[3]	nompC_KO		248.781	50.5221
w*;nompC[3]	nompC_KO		250.682	46.7875
w*;nompC[3]	nompC_KO		255.328	46.5189
w*;nompC[3]	nompC_KO		255.67	45.5959
w*;nompC[3]	nompC_KO		261.138	45.0696
w*;nompC[3]	nompC_KO		284.262	47.8637
w*;nompC[3]	nompC_KO		345.587	47.9191
w*;nompC[3]	nompC_KO		431.147	49.3358
w*;nompC[3]	nompC_KO		432.936	50.1221
w*;nompC[3]	nompC_KO		452.685	51.3304
w*;nompC[3]	nompC_KO		457.374	50.2807
w*;nompC[3]	nompC_KO		457.729	49.9144
w*;nompC[3]	nompC_KO		471.262	48.4867
w*;nompC[3]	nompC_KO		474.082	49.0791
w*;nompC[3]	nompC_KO		499.331	47.2054
w*;nompC[3]	nompC_KO		510.555	49.8178
w*;nompC[3]	nompC_KO		520.645	47.6165
w*;nompC[3]	nompC_KO		529.709	48.5501
w*;nompC[3]	nompC_KO		532.773	49.2999
w*;nompC[3]	nompC_KO		533.323	49.4546
w*;nompC[3]	nompC_KO		538.404	49.5551
w*;nompC[3]	nompC_KO		541.398	49.8764
w*;nompC[3]	nompC_KO		555.213	50.5791
w*;nompC[3]	nompC_KO		566.232	50.4926
w*;nompC[3]	nompC_KO		572.723	47.8247
w*;nompC[3]	nompC_KO		578.394	46.6602
w*;nompC[3]	nompC_KO		589.96	46.8081
w*;nompC[3]	nompC_KO		628.126	50.0811
w*;nompC[3]	nompC_KO		661.338	48.9764
w*;nompC[3]	nompC_KO		784.401	50.0878
w*;nompC[3]	nompC_KO		785.188	51.1263
w*;nompC[3]	nompC_KO		786.946	51.7283
w*;nompC[3]	nompC_KO		839.204	50.9017
w*;nompC[3]	nompC_KO		851.792	52.2875
w*;nompC[3]	nompC_KO		855.665	49.4711
w*;nompC[3]	nompC_KO		858.147	49.9289
w*;nompC[3]	nompC_KO		916.414	48.0281
w*;nompC[3]	nompC_KO		921.032	49.0439
w*;nompC[3]	nompC_KO		928.339	51.3193
w*;nompC[3]	nompC_KO		929.402	50.0479
w*;nompC[3]	nompC_KO		931.433	50.2257
w*;nompC[3]	nompC_KO		954.889	50.5581
w*;nompC[3]	nompC_KO		970.358	50.6556
w*;nompC[3]	nompC_KO		1000.5	51.1868
w*;nompC[3]	nompC_KO		1000.51	51.0852
w*;nompC[3]	nompC_KO		1012.95	50.9763
w*;nompC[3]	nompC_KO		1031.64	49.9582
w*;nompC[3]	nompC_KO		1037.32	51.128
w*;nompC[3]	nompC_KO		1056.37	48.8705
w*;nompC[3]	nompC_KO		1083.34	48.4684
w*;nompC[3]	nompC_KO		1128.64	51.9878
w*;nompC[3]	nompC_KO		1129.28	50.6494
w*;nompC[3]	nompC_KO		1137.35	52.2026
w*;nompC[3]	nompC_KO		1199.18	52.2038
w*;nompC[3]	nompC_KO		1212.48	51.2826
w*;nompC[3]	nompC_KO		1215.42	53.6183
w*;nompC[3]	nompC_KO		1222.7	50.0419
w*;nompC[3]	nompC_KO		1241.86	50.2101
w*;nompC[3]	nompC_KO		1243.59	51.0818
w*;nompC[3]	nompC_KO		1322.11	50.7396
w*;nompC[3]	nompC_KO		1329.95	51.8138
w*;nompC[3]	nompC_KO		1331.14	50.0162
w*;nompC[3]	nompC_KO		1357.31	50.718
w*;nompC[3]	nompC_KO		1378.76	51.8778
w*;nompC[3]	nompC_KO		1395.53	52.0744
w*;nompC[3]	nompC_KO		1425.5	52.0549
w*;nompC[3]	nompC_KO		1450.97	52.8245
w*;nompC[3]	nompC_KO		1458.17	51.997
w*;nompC[3]	nompC_KO		1464.42	52.8245
w*;nompC[3]	nompC_KO		1477.68	51.242
w*;nompC[3]	nompC_KO		1481.51	53.4587
w*;nompC[3]	nompC_KO		1496.01	52.5297
w*;nompC[3]	nompC_KO		1499.31	52.9888
w*;nompC[3]	nompC_KO		1501.21	51.7943
w*;nompC[3]	nompC_KO		1540.16	50.9074
w*;nompC[3]	nompC_KO		1545.94	54.7945
w*;nompC[3]	nompC_KO		1559.49	50.1234
w*;nompC[3]	nompC_KO		1573.79	51.9893
w*;nompC[3]	nompC_KO		1622.13	50.9426
w*;nompC[3]	nompC_KO		1632.66	51.8942
w*;nompC[3]	nompC_KO		1725.05	51.9119
w*;nompC[3]	nompC_KO		1734.45	52.3649
w*;nompC[3]	nompC_KO		1745.1	53.4062
w*;nompC[3]	nompC_KO		1770.39	51.4054
w*;nompC[3]	nompC_KO		1790.89	51.6766
w*;nompC[3]	nompC_KO		1793.23	52.8534
w*;nompC[3]	nompC_KO		1807.24	53.6519
w*;nompC[3]	nompC_KO		1815.22	53.2165
w*;nompC[3]	nompC_KO		1831.97	51.9517
w*;nompC[3]	nompC_KO		1855.05	54.0409
w*;nompC[3]	nompC_KO		1888.22	53.3004
w*;nompC[3]	nompC_KO		1894.59	53.1532
w*;nompC[3]	nompC_KO		1902.64	56.042
w*;nompC[3]	nompC_KO		1902.93	54.2611
w*;nompC[3]	nompC_KO		1947.57	52.6375
w*;nompC[3]	nompC_KO		1960.58	52.7985
w*;nompC[3]	nompC_KO		1993.29	53.6674
w*;nompC[3]	nompC_KO		1995.5	51.7127
w*;nompC[3]	nompC_KO		2013.54	52.4785
w*;nompC[3]	nompC_KO		2018.4	52.4755
w*;nompC[3]	nompC_KO		2019.62	51.5717
w*;nompC[3]	nompC_KO		2087.57	54.9679
w*;nompC[3]	nompC_KO		2120.09	52.7807
w*;nompC[3]	nompC_KO		2136.26	54.7507
w*;nompC[3]	nompC_KO		2141.22	53.6152
w*;nompC[3]	nompC_KO		2214.89	53.6817
w*;nompC[3]	nompC_KO		2219.65	52.4628
w*;nompC[3]	nompC_KO		2304.41	52.5029
w*;nompC[3]	nompC_KO		2332.41	54.1014
w*;nompC[3]	nompC_KO		2361.6	54.1357
w*;nompC[3]	nompC_KO		2367.49	55.3528
w*;nompC[3]	nompC_KO		2434.26	53.6359
w*;nompC[3]	nompC_KO		2487.76	54.0106
w*;nompC[3]	nompC_KO		2490.64	55.3398
w*;nompC[3]	nompC_KO		2491.43	54.5354
w*;nompC[3]	nompC_KO		2500.43	52.7547
w*;nompC[3]	nompC_KO		2505.8	55.314
w*;nompC[3]	nompC_KO		2522.63	53.2886
w*;nompC[3]	nompC_KO		2577.53	57.9994
w*;nompC[3]	nompC_KO		2678.31	53.5865
w*;nompC[3]	nompC_KO		2735.95	53.0608
w*;nompC[3]	nompC_KO		2789.67	53.7163
w*;nompC[3]	nompC_KO		2862.4	53.4897
w*;nompC[3]	nompC_KO		2918.77	55.377
w*;nompC[3]	nompC_KO		2934.82	55.6679
w*;nompC[3]	nompC_KO		2949.19	57.0128
w*;nompC[3]	nompC_KO		2981.91	55.9281
w*;nompC[3]	nompC_KO		3053.47	53.8755
w*;nompC[3]	nompC_KO		3141.38	57.1339
w*;nompC[3]	nompC_KO		3216.11	56.06
w*;nompC[3]	nompC_KO		3258.79	56.6899
w*;nompC[3]	nompC_KO		3340.22	55.0802
w*;nompC[3]	nompC_KO		3411.78	56.784
w*;nompC[3]	nompC_KO		3412.69	56.2633
w*;nompC[3]	nompC_KO		3431.84	54.9206
w*;nompC[3]	nompC_KO		3732.74	57.9523
w*;nompC[3]	nompC_KO		3896.3	55.0392
w*;nompC[3]	nompC_KO		4427.18	58.0675
w*;nompC[3]	nompC_KO		4486.76	59.0762
w*;nompC[3]	nompC_KO		4530.06	61.6507
w*;nompC[3]	nompC_KO		4539.15	55.9743
w*;nompC[3]	nompC_KO		4812.15	56.2216
w*;nompC[3]	nompC_KO		4930.99	56.149
w*;nompC[3]	nompC_KO		5065.29	55.9539
w*;nompC[3]	nompC_KO		5170.63	61.4181
w*;nompC[3]	nompC_KO		5263.17	60.2022
w*;nompC[3]	nompC_KO		5291.5	61.2678
w*;nompC[3]	nompC_KO		5304.59	60.2129
w*;nompC[3]	nompC_KO		5623.63	56.8325
w*;nompC[3]	nompC_KO		5661.04	63.0193
w*;nompC[3]	nompC_KO		5706.94	60.2865
w*;nompC[3]	nompC_KO		5871.5	59.7041
w*;nompC[3]	nompC_KO		5994.53	58.4449
w*;nompC[3]	nompC_KO		6111.65	62.6471
w*;nompC[3]	nompC_KO		6126.64	58.8343
w*;nompC[3]	nompC_KO		6147.73	61.9534
w*;nompC[3]	nompC_KO		6169.64	60.2966
w*;nompC[3]	nompC_KO		6894.18	60.4963
w*;nompC[3]	nompC_KO		6934.41	61.0601
w*;nompC[3]	nompC_KO		6945.45	64.3389
w*;nompC[3]	nompC_KO		7009.61	57.385
w*;nompC[3]	nompC_KO		7026	57.863
w*;nompC[3]	nompC_KO		7554.99	57.9495
w*;nompC[3]	nompC_KO		7653.55	58.3597
w*;nompC[3]	nompC_KO		7910.67	65.5167
w*;nompC[3]	nompC_KO		7917.05	57.1585
w*;nompC[3]	nompC_KO		8057.07	63.9473
w*;nompC[3]	nompC_KO		8068.54	63.2127
w*;nompC[3]	nompC_KO		8237.63	62.9027
w*;nompC[3]	nompC_KO		8785.79	66.8218
w*;nompC[3]	nompC_KO		8878.19	58.9527
w*;nompC[3]	nompC_KO		9000.68	63.6964
w*;nompC[3]	nompC_KO		9107.24	61.7555
w*;nompC[3]	nompC_KO		9288.47	60.8658
w*;nompC[3]	nompC_KO		9338.5	67.2285
w*;nompC[3]	nompC_KO		9385.84	67.1721
w*;nompC[3]	nompC_KO		9394.21	61.732
w*;nompC[3]	nompC_KO		9502.19	62.5474
w*;nompC[3]	nompC_KO		9603.36	62.9451
w*;nompC[3]	nompC_KO		9660.93	66.7713
w*;nompC[3]	nompC_KO		9671.75	63.1853
w*;nompC[3]	nompC_KO		9970.3	60.1553
w*;nompC[3]	nompC_KO		10797.1	59.6227
w*;nompC[3]	nompC_KO		10823.8	68.1739
w*;nompC[3]	nompC_KO		10843.4	60.4532
w*;nompC[3]	nompC_KO		10873.2	58.9878
w*;nompC[3]	nompC_KO		11039.4	66.5594
w*;nompC[3]	nompC_KO		11083.5	70.144
w*;nompC[3]	nompC_KO		11257.6	58.1566
w*;nompC[3]	nompC_KO		11632.4	65.9073
w*;nompC[3]	nompC_KO		12380.6	67.197
w*;nompC[3]	nompC_KO		12382.2	62.1237
w*;nompC[3]	nompC_KO		12444	70.5912
w*;nompC[3]	nompC_KO		12744.4	66.0154
w*;nompC[3]	nompC_KO		12987.4	63.7909
w*;nompC[3]	nompC_KO		13092.4	63.294
w*;nompC[3]	nompC_KO		13420.9	65.778
w*;nompC[3]	nompC_KO		15221.4	61.5128

## Sheet: Fig_3_a_to_d_linear
genotype_long	genotype	displacement_nm	linear_stiffness_kappa_microN*m-1
w*;nompC[3],UAS-NompC::GFP/nompC[3];nompC-GAL4	NOMPC:GFP	14121.6	43.6686
w*;nompC[3],UAS-NompC::GFP/nompC[3];nompC-GAL4	NOMPC:GFP	8980.47	48.1573
w*;nompC[3],UAS-NompC::GFP/nompC[3];nompC-GAL4	NOMPC:GFP	6567.15	49.4076
w*;nompC[3],UAS-NompC::GFP/nompC[3];nompC-GAL4	NOMPC:GFP	3163.72	51.0995
w*;nompC[3],UAS-NompC::GFP/nompC[3];nompC-GAL4	NOMPC:GFP	2104	51.5571
w*;nompC[3],UAS-NompC::GFP/nompC[3];nompC-GAL4	NOMPC:GFP	1735.55	51.418
w*;nompC[3],UAS-NompC::GFP/nompC[3];nompC-GAL4	NOMPC:GFP	1365.78	51.282
w*;nompC[3],UAS-NompC::GFP/nompC[3];nompC-GAL4	NOMPC:GFP	1004.38	51.4347
w*;nompC[3],UAS-NompC::GFP/nompC[3];nompC-GAL4	NOMPC:GFP	648.958	49.7627
w*;nompC[3],UAS-NompC::GFP/nompC[3];nompC-GAL4	NOMPC:GFP	293.315	47.3561
w*;nompC[3],UAS-NompC::GFP/nompC[3];nompC-GAL4	NOMPC:GFP	161.814	49.3767
w*;nompC[3],UAS-NompC::GFP/nompC[3];nompC-GAL4	NOMPC:GFP	99.6116	45.0695
w*;nompC[3],UAS-NompC::GFP/nompC[3];nompC-GAL4	NOMPC:GFP	37.3772	46.7844
w*;nompC[3],UAS-NompC::GFP/nompC[3];nompC-GAL4	NOMPC:GFP	-47.0836	45.3154
w*;nompC[3],UAS-NompC::GFP/nompC[3];nompC-GAL4	NOMPC:GFP	-105.828	50.0351
w*;nompC[3],UAS-NompC::GFP/nompC[3];nompC-GAL4	NOMPC:GFP	-225.87	48.7214
w*;nompC[3],UAS-NompC::GFP/nompC[3];nompC-GAL4	NOMPC:GFP	-587.721	51.1094
w*;nompC[3],UAS-NompC::GFP/nompC[3];nompC-GAL4	NOMPC:GFP	-958.41	51.5286
w*;nompC[3],UAS-NompC::GFP/nompC[3];nompC-GAL4	NOMPC:GFP	-1278.3	52.72
w*;nompC[3],UAS-NompC::GFP/nompC[3];nompC-GAL4	NOMPC:GFP	-1631.29	52.1603
w*;nompC[3],UAS-NompC::GFP/nompC[3];nompC-GAL4	NOMPC:GFP	-1986.51	52.425
w*;nompC[3],UAS-NompC::GFP/nompC[3];nompC-GAL4	NOMPC:GFP	-2939.6	52.8383
w*;nompC[3],UAS-NompC::GFP/nompC[3];nompC-GAL4	NOMPC:GFP	-5926.26	52.1117
w*;nompC[3],UAS-NompC::GFP/nompC[3];nompC-GAL4	NOMPC:GFP	-7900.27	51.9194
w*;nompC[3],UAS-NompC::GFP/nompC[3];nompC-GAL4	NOMPC:GFP	-11655.3	52.7414
w*;nompC[3],UAS-NompC::GFP/nompC[3];nompC-GAL4	NOMPC:GFP	15847.5	46.9491
w*;nompC[3],UAS-NompC::GFP/nompC[3];nompC-GAL4	NOMPC:GFP	10176.5	47.6743
w*;nompC[3],UAS-NompC::GFP/nompC[3];nompC-GAL4	NOMPC:GFP	7518.68	48.6167
w*;nompC[3],UAS-NompC::GFP/nompC[3];nompC-GAL4	NOMPC:GFP	3574.27	50.9709
w*;nompC[3],UAS-NompC::GFP/nompC[3];nompC-GAL4	NOMPC:GFP	2395.18	50.5488
w*;nompC[3],UAS-NompC::GFP/nompC[3];nompC-GAL4	NOMPC:GFP	1962.79	50.9524
w*;nompC[3],UAS-NompC::GFP/nompC[3];nompC-GAL4	NOMPC:GFP	1562.27	51.3004
w*;nompC[3],UAS-NompC::GFP/nompC[3];nompC-GAL4	NOMPC:GFP	1178.88	49.4859
w*;nompC[3],UAS-NompC::GFP/nompC[3];nompC-GAL4	NOMPC:GFP	747.301	49.69
w*;nompC[3],UAS-NompC::GFP/nompC[3];nompC-GAL4	NOMPC:GFP	340.51	47.0233
w*;nompC[3],UAS-NompC::GFP/nompC[3];nompC-GAL4	NOMPC:GFP	192.127	46.6143
w*;nompC[3],UAS-NompC::GFP/nompC[3];nompC-GAL4	NOMPC:GFP	104.877	49.5354
w*;nompC[3],UAS-NompC::GFP/nompC[3];nompC-GAL4	NOMPC:GFP	-42.8946	52.3424
w*;nompC[3],UAS-NompC::GFP/nompC[3];nompC-GAL4	NOMPC:GFP	-116.714	51.3808
w*;nompC[3],UAS-NompC::GFP/nompC[3];nompC-GAL4	NOMPC:GFP	-261.596	49.6251
w*;nompC[3],UAS-NompC::GFP/nompC[3];nompC-GAL4	NOMPC:GFP	-674.478	50.7766
w*;nompC[3],UAS-NompC::GFP/nompC[3];nompC-GAL4	NOMPC:GFP	-1114.18	49.3421
w*;nompC[3],UAS-NompC::GFP/nompC[3];nompC-GAL4	NOMPC:GFP	-1474.75	51.5145
w*;nompC[3],UAS-NompC::GFP/nompC[3];nompC-GAL4	NOMPC:GFP	-1858.33	51.9922
w*;nompC[3],UAS-NompC::GFP/nompC[3];nompC-GAL4	NOMPC:GFP	-2291.15	51.494
w*;nompC[3],UAS-NompC::GFP/nompC[3];nompC-GAL4	NOMPC:GFP	-3471.22	50.7337
w*;nompC[3],UAS-NompC::GFP/nompC[3];nompC-GAL4	NOMPC:GFP	-6953.3	50.6709
w*;nompC[3],UAS-NompC::GFP/nompC[3];nompC-GAL4	NOMPC:GFP	-9349.1	50.3764
w*;nompC[3],UAS-NompC::GFP/nompC[3];nompC-GAL4	NOMPC:GFP	-13860.2	50.3898
w*;nompC[3],UAS-NompC::GFP/nompC[3];nompC-GAL4	NOMPC:GFP	14244.4	47.2304
w*;nompC[3],UAS-NompC::GFP/nompC[3];nompC-GAL4	NOMPC:GFP	9351.66	47.3796
w*;nompC[3],UAS-NompC::GFP/nompC[3];nompC-GAL4	NOMPC:GFP	6760.68	48.7936
w*;nompC[3],UAS-NompC::GFP/nompC[3];nompC-GAL4	NOMPC:GFP	3253.85	50.5785
w*;nompC[3],UAS-NompC::GFP/nompC[3];nompC-GAL4	NOMPC:GFP	2141.33	51.6169
w*;nompC[3],UAS-NompC::GFP/nompC[3];nompC-GAL4	NOMPC:GFP	1815.93	50.8329
w*;nompC[3],UAS-NompC::GFP/nompC[3];nompC-GAL4	NOMPC:GFP	1433.28	49.6606
w*;nompC[3],UAS-NompC::GFP/nompC[3];nompC-GAL4	NOMPC:GFP	1027.97	51.5036
w*;nompC[3],UAS-NompC::GFP/nompC[3];nompC-GAL4	NOMPC:GFP	645.403	52.6418
w*;nompC[3],UAS-NompC::GFP/nompC[3];nompC-GAL4	NOMPC:GFP	295.775	50.484
w*;nompC[3],UAS-NompC::GFP/nompC[3];nompC-GAL4	NOMPC:GFP	165.404	51.2942
w*;nompC[3],UAS-NompC::GFP/nompC[3];nompC-GAL4	NOMPC:GFP	35.447	54.5884
w*;nompC[3],UAS-NompC::GFP/nompC[3];nompC-GAL4	NOMPC:GFP	-108.91	47.203
w*;nompC[3],UAS-NompC::GFP/nompC[3];nompC-GAL4	NOMPC:GFP	-245.796	48.2041
w*;nompC[3],UAS-NompC::GFP/nompC[3];nompC-GAL4	NOMPC:GFP	-640.581	47.3781
w*;nompC[3],UAS-NompC::GFP/nompC[3];nompC-GAL4	NOMPC:GFP	-988.053	50.6001
w*;nompC[3],UAS-NompC::GFP/nompC[3];nompC-GAL4	NOMPC:GFP	-1377.78	50.4312
w*;nompC[3],UAS-NompC::GFP/nompC[3];nompC-GAL4	NOMPC:GFP	-1718.9	50.6087
w*;nompC[3],UAS-NompC::GFP/nompC[3];nompC-GAL4	NOMPC:GFP	-2085.77	50.3032
w*;nompC[3],UAS-NompC::GFP/nompC[3];nompC-GAL4	NOMPC:GFP	-3075.98	50.3008
w*;nompC[3],UAS-NompC::GFP/nompC[3];nompC-GAL4	NOMPC:GFP	-6414.99	49.9332
w*;nompC[3],UAS-NompC::GFP/nompC[3];nompC-GAL4	NOMPC:GFP	-8633.48	49.3679
w*;nompC[3],UAS-NompC::GFP/nompC[3];nompC-GAL4	NOMPC:GFP	-13005.6	49.0652
w*;nompC[3],UAS-NompC::GFP/nompC[3];nompC-GAL4	NOMPC:GFP	12909.8	47.9808
w*;nompC[3],UAS-NompC::GFP/nompC[3];nompC-GAL4	NOMPC:GFP	8581.78	47.7535
w*;nompC[3],UAS-NompC::GFP/nompC[3];nompC-GAL4	NOMPC:GFP	6357.76	47.4243
w*;nompC[3],UAS-NompC::GFP/nompC[3];nompC-GAL4	NOMPC:GFP	3060.48	48.7733
w*;nompC[3],UAS-NompC::GFP/nompC[3];nompC-GAL4	NOMPC:GFP	1990.49	50.0004
w*;nompC[3],UAS-NompC::GFP/nompC[3];nompC-GAL4	NOMPC:GFP	1619.07	51.4657
w*;nompC[3],UAS-NompC::GFP/nompC[3];nompC-GAL4	NOMPC:GFP	1274.73	51.3049
w*;nompC[3],UAS-NompC::GFP/nompC[3];nompC-GAL4	NOMPC:GFP	926.518	52.2142
w*;nompC[3],UAS-NompC::GFP/nompC[3];nompC-GAL4	NOMPC:GFP	585.532	51.7954
w*;nompC[3],UAS-NompC::GFP/nompC[3];nompC-GAL4	NOMPC:GFP	249.244	50.7157
w*;nompC[3],UAS-NompC::GFP/nompC[3];nompC-GAL4	NOMPC:GFP	125.14	50.5522
w*;nompC[3],UAS-NompC::GFP/nompC[3];nompC-GAL4	NOMPC:GFP	65.1072	47.1476
w*;nompC[3],UAS-NompC::GFP/nompC[3];nompC-GAL4	NOMPC:GFP	30.8497	52.292
w*;nompC[3],UAS-NompC::GFP/nompC[3];nompC-GAL4	NOMPC:GFP	16.7463	48.5526
w*;nompC[3],UAS-NompC::GFP/nompC[3];nompC-GAL4	NOMPC:GFP	-33.1883	48.0223
w*;nompC[3],UAS-NompC::GFP/nompC[3];nompC-GAL4	NOMPC:GFP	-62.9142	50.5129
w*;nompC[3],UAS-NompC::GFP/nompC[3];nompC-GAL4	NOMPC:GFP	-124.269	46.5399
w*;nompC[3],UAS-NompC::GFP/nompC[3];nompC-GAL4	NOMPC:GFP	-252.709	49.1723
w*;nompC[3],UAS-NompC::GFP/nompC[3];nompC-GAL4	NOMPC:GFP	-588.074	51.9435
w*;nompC[3],UAS-NompC::GFP/nompC[3];nompC-GAL4	NOMPC:GFP	-917.924	52.498
w*;nompC[3],UAS-NompC::GFP/nompC[3];nompC-GAL4	NOMPC:GFP	-1250.24	52.7084
w*;nompC[3],UAS-NompC::GFP/nompC[3];nompC-GAL4	NOMPC:GFP	-1601.68	51.8716
w*;nompC[3],UAS-NompC::GFP/nompC[3];nompC-GAL4	NOMPC:GFP	-1965.94	51.389
w*;nompC[3],UAS-NompC::GFP/nompC[3];nompC-GAL4	NOMPC:GFP	-2957.95	50.6881
w*;nompC[3],UAS-NompC::GFP/nompC[3];nompC-GAL4	NOMPC:GFP	-6062.33	49.4692
w*;nompC[3],UAS-NompC::GFP/nompC[3];nompC-GAL4	NOMPC:GFP	-8110.13	48.105
w*;nompC[3],UAS-NompC::GFP/nompC[3];nompC-GAL4	NOMPC:GFP	-11967.9	49.107
w*;nompC[3],UAS-NompC::GFP/nompC[3];nompC-GAL4	NOMPC:GFP	14349.8	49.0381
w*;nompC[3],UAS-NompC::GFP/nompC[3];nompC-GAL4	NOMPC:GFP	9323.45	49.3944
w*;nompC[3],UAS-NompC::GFP/nompC[3];nompC-GAL4	NOMPC:GFP	6868.36	49.7636
w*;nompC[3],UAS-NompC::GFP/nompC[3];nompC-GAL4	NOMPC:GFP	3339.86	50.7661
w*;nompC[3],UAS-NompC::GFP/nompC[3];nompC-GAL4	NOMPC:GFP	2216.06	51.383
w*;nompC[3],UAS-NompC::GFP/nompC[3];nompC-GAL4	NOMPC:GFP	1834.62	50.9088
w*;nompC[3],UAS-NompC::GFP/nompC[3];nompC-GAL4	NOMPC:GFP	1427.11	52.1444
w*;nompC[3],UAS-NompC::GFP/nompC[3];nompC-GAL4	NOMPC:GFP	1048.35	52.0641
w*;nompC[3],UAS-NompC::GFP/nompC[3];nompC-GAL4	NOMPC:GFP	684.581	51.4068
w*;nompC[3],UAS-NompC::GFP/nompC[3];nompC-GAL4	NOMPC:GFP	317.727	48.384
w*;nompC[3],UAS-NompC::GFP/nompC[3];nompC-GAL4	NOMPC:GFP	173.473	47.6306
w*;nompC[3],UAS-NompC::GFP/nompC[3];nompC-GAL4	NOMPC:GFP	105.321	44.8776
w*;nompC[3],UAS-NompC::GFP/nompC[3];nompC-GAL4	NOMPC:GFP	-10.6519	51.7625
w*;nompC[3],UAS-NompC::GFP/nompC[3];nompC-GAL4	NOMPC:GFP	-45.6852	48.1863
w*;nompC[3],UAS-NompC::GFP/nompC[3];nompC-GAL4	NOMPC:GFP	-116.436	49.203
w*;nompC[3],UAS-NompC::GFP/nompC[3];nompC-GAL4	NOMPC:GFP	-249.478	49.9933
w*;nompC[3],UAS-NompC::GFP/nompC[3];nompC-GAL4	NOMPC:GFP	-641.876	49.6932
w*;nompC[3],UAS-NompC::GFP/nompC[3];nompC-GAL4	NOMPC:GFP	-1008.63	50.7169
w*;nompC[3],UAS-NompC::GFP/nompC[3];nompC-GAL4	NOMPC:GFP	-1357.39	52.2811
w*;nompC[3],UAS-NompC::GFP/nompC[3];nompC-GAL4	NOMPC:GFP	-1744.78	50.9807
w*;nompC[3],UAS-NompC::GFP/nompC[3];nompC-GAL4	NOMPC:GFP	-2122.28	51.0375
w*;nompC[3],UAS-NompC::GFP/nompC[3];nompC-GAL4	NOMPC:GFP	-3156.55	51.3122
w*;nompC[3],UAS-NompC::GFP/nompC[3];nompC-GAL4	NOMPC:GFP	-6403.16	49.9161
w*;nompC[3],UAS-NompC::GFP/nompC[3];nompC-GAL4	NOMPC:GFP	-8670.54	48.8765
w*;nompC[3],UAS-NompC::GFP/nompC[3];nompC-GAL4	NOMPC:GFP	-12919.6	48.2791
w*;nompC[3],UAS-NompC::GFP/nompC[3];nompC-GAL4	NOMPC:GFP	12081.7	45.7879
w*;nompC[3],UAS-NompC::GFP/nompC[3];nompC-GAL4	NOMPC:GFP	7832.91	47.068
w*;nompC[3],UAS-NompC::GFP/nompC[3];nompC-GAL4	NOMPC:GFP	5696.22	48.5576
w*;nompC[3],UAS-NompC::GFP/nompC[3];nompC-GAL4	NOMPC:GFP	2688.98	51.1275
w*;nompC[3],UAS-NompC::GFP/nompC[3];nompC-GAL4	NOMPC:GFP	1757.14	52.0253
w*;nompC[3],UAS-NompC::GFP/nompC[3];nompC-GAL4	NOMPC:GFP	1447.12	51.6601
w*;nompC[3],UAS-NompC::GFP/nompC[3];nompC-GAL4	NOMPC:GFP	1141.19	51.3144
w*;nompC[3],UAS-NompC::GFP/nompC[3];nompC-GAL4	NOMPC:GFP	842.567	51.3741
w*;nompC[3],UAS-NompC::GFP/nompC[3];nompC-GAL4	NOMPC:GFP	534.733	50.692
w*;nompC[3],UAS-NompC::GFP/nompC[3];nompC-GAL4	NOMPC:GFP	229.82	49.5008
w*;nompC[3],UAS-NompC::GFP/nompC[3];nompC-GAL4	NOMPC:GFP	114.116	49.0373
w*;nompC[3],UAS-NompC::GFP/nompC[3];nompC-GAL4	NOMPC:GFP	57.1747	50.1136
w*;nompC[3],UAS-NompC::GFP/nompC[3];nompC-GAL4	NOMPC:GFP	29.7211	47.2875
w*;nompC[3],UAS-NompC::GFP/nompC[3];nompC-GAL4	NOMPC:GFP	15.7408	49.1801
w*;nompC[3],UAS-NompC::GFP/nompC[3];nompC-GAL4	NOMPC:GFP	-15.5602	46.3
w*;nompC[3],UAS-NompC::GFP/nompC[3];nompC-GAL4	NOMPC:GFP	-28.7662	47.6812
w*;nompC[3],UAS-NompC::GFP/nompC[3];nompC-GAL4	NOMPC:GFP	-63.4236	42.4423
w*;nompC[3],UAS-NompC::GFP/nompC[3];nompC-GAL4	NOMPC:GFP	-117.994	48.7191
w*;nompC[3],UAS-NompC::GFP/nompC[3];nompC-GAL4	NOMPC:GFP	-225.364	50.7206
w*;nompC[3],UAS-NompC::GFP/nompC[3];nompC-GAL4	NOMPC:GFP	-522.268	51.818
w*;nompC[3],UAS-NompC::GFP/nompC[3];nompC-GAL4	NOMPC:GFP	-817.183	52.9455
w*;nompC[3],UAS-NompC::GFP/nompC[3];nompC-GAL4	NOMPC:GFP	-1123	52.4498
w*;nompC[3],UAS-NompC::GFP/nompC[3];nompC-GAL4	NOMPC:GFP	-1418.54	53.167
w*;nompC[3],UAS-NompC::GFP/nompC[3];nompC-GAL4	NOMPC:GFP	-1725.41	51.8676
w*;nompC[3],UAS-NompC::GFP/nompC[3];nompC-GAL4	NOMPC:GFP	-2587.55	52.9112
w*;nompC[3],UAS-NompC::GFP/nompC[3];nompC-GAL4	NOMPC:GFP	-5345.47	49.6613
w*;nompC[3],UAS-NompC::GFP/nompC[3];nompC-GAL4	NOMPC:GFP	-7027.58	51.5636
w*;nompC[3],UAS-NompC::GFP/nompC[3];nompC-GAL4	NOMPC:GFP	-10216.8	53.0264
w*;nompC[3],UAS-LH+LH-NompC::GFP/nompC[3];nompC-GAL4	LH+LH-NOMPC:GFP	9933.05	50.8146
w*;nompC[3],UAS-LH+LH-NompC::GFP/nompC[3];nompC-GAL4	LH+LH-NOMPC:GFP	7516.53	50.2543
w*;nompC[3],UAS-LH+LH-NompC::GFP/nompC[3];nompC-GAL4	LH+LH-NOMPC:GFP	3828.57	49.2149
w*;nompC[3],UAS-LH+LH-NompC::GFP/nompC[3];nompC-GAL4	LH+LH-NOMPC:GFP	2611.28	48.8311
w*;nompC[3],UAS-LH+LH-NompC::GFP/nompC[3];nompC-GAL4	LH+LH-NOMPC:GFP	2130.62	49.3626
w*;nompC[3],UAS-LH+LH-NompC::GFP/nompC[3];nompC-GAL4	LH+LH-NOMPC:GFP	1716.79	48.3606
w*;nompC[3],UAS-LH+LH-NompC::GFP/nompC[3];nompC-GAL4	LH+LH-NOMPC:GFP	1263.76	48.6558
w*;nompC[3],UAS-LH+LH-NompC::GFP/nompC[3];nompC-GAL4	LH+LH-NOMPC:GFP	808.597	48.5315
w*;nompC[3],UAS-LH+LH-NompC::GFP/nompC[3];nompC-GAL4	LH+LH-NOMPC:GFP	337.518	52.5725
w*;nompC[3],UAS-LH+LH-NompC::GFP/nompC[3];nompC-GAL4	LH+LH-NOMPC:GFP	189.818	49.8246
w*;nompC[3],UAS-LH+LH-NompC::GFP/nompC[3];nompC-GAL4	LH+LH-NOMPC:GFP	107.304	51.431
w*;nompC[3],UAS-LH+LH-NompC::GFP/nompC[3];nompC-GAL4	LH+LH-NOMPC:GFP	63.1691	51.9523
w*;nompC[3],UAS-LH+LH-NompC::GFP/nompC[3];nompC-GAL4	LH+LH-NOMPC:GFP	43.325	50.3985
w*;nompC[3],UAS-LH+LH-NompC::GFP/nompC[3];nompC-GAL4	LH+LH-NOMPC:GFP	3.88823	57.3825
w*;nompC[3],UAS-LH+LH-NompC::GFP/nompC[3];nompC-GAL4	LH+LH-NOMPC:GFP	-11.9863	50.6851
w*;nompC[3],UAS-LH+LH-NompC::GFP/nompC[3];nompC-GAL4	LH+LH-NOMPC:GFP	-49.5358	47.7251
w*;nompC[3],UAS-LH+LH-NompC::GFP/nompC[3];nompC-GAL4	LH+LH-NOMPC:GFP	-126.439	49.2759
w*;nompC[3],UAS-LH+LH-NompC::GFP/nompC[3];nompC-GAL4	LH+LH-NOMPC:GFP	-265.954	52.6923
w*;nompC[3],UAS-LH+LH-NompC::GFP/nompC[3];nompC-GAL4	LH+LH-NOMPC:GFP	-738.069	48.562
w*;nompC[3],UAS-LH+LH-NompC::GFP/nompC[3];nompC-GAL4	LH+LH-NOMPC:GFP	-1170.91	49.5558
w*;nompC[3],UAS-LH+LH-NompC::GFP/nompC[3];nompC-GAL4	LH+LH-NOMPC:GFP	-1649.42	48.0916
w*;nompC[3],UAS-LH+LH-NompC::GFP/nompC[3];nompC-GAL4	LH+LH-NOMPC:GFP	-2099.15	48.5562
w*;nompC[3],UAS-LH+LH-NompC::GFP/nompC[3];nompC-GAL4	LH+LH-NOMPC:GFP	-2543.83	48.6223
w*;nompC[3],UAS-LH+LH-NompC::GFP/nompC[3];nompC-GAL4	LH+LH-NOMPC:GFP	-3833.07	48.5284
w*;nompC[3],UAS-LH+LH-NompC::GFP/nompC[3];nompC-GAL4	LH+LH-NOMPC:GFP	-7555.29	49.4203
w*;nompC[3],UAS-LH+LH-NompC::GFP/nompC[3];nompC-GAL4	LH+LH-NOMPC:GFP	-9981.75	50.6982
w*;nompC[3],UAS-LH+LH-NompC::GFP/nompC[3];nompC-GAL4	LH+LH-NOMPC:GFP	16440.8	47.34
w*;nompC[3],UAS-LH+LH-NompC::GFP/nompC[3];nompC-GAL4	LH+LH-NOMPC:GFP	11095	46.8348
w*;nompC[3],UAS-LH+LH-NompC::GFP/nompC[3];nompC-GAL4	LH+LH-NOMPC:GFP	8297	47.0477
w*;nompC[3],UAS-LH+LH-NompC::GFP/nompC[3];nompC-GAL4	LH+LH-NOMPC:GFP	4152.66	47.0776
w*;nompC[3],UAS-LH+LH-NompC::GFP/nompC[3];nompC-GAL4	LH+LH-NOMPC:GFP	2777.81	47.5272
w*;nompC[3],UAS-LH+LH-NompC::GFP/nompC[3];nompC-GAL4	LH+LH-NOMPC:GFP	2326.74	46.5778
w*;nompC[3],UAS-LH+LH-NompC::GFP/nompC[3];nompC-GAL4	LH+LH-NOMPC:GFP	1791.37	47.6654
w*;nompC[3],UAS-LH+LH-NompC::GFP/nompC[3];nompC-GAL4	LH+LH-NOMPC:GFP	1394.17	45.3058
w*;nompC[3],UAS-LH+LH-NompC::GFP/nompC[3];nompC-GAL4	LH+LH-NOMPC:GFP	855.584	46.1822
w*;nompC[3],UAS-LH+LH-NompC::GFP/nompC[3];nompC-GAL4	LH+LH-NOMPC:GFP	412.694	42.9291
w*;nompC[3],UAS-LH+LH-NompC::GFP/nompC[3];nompC-GAL4	LH+LH-NOMPC:GFP	206.203	48.1823
w*;nompC[3],UAS-LH+LH-NompC::GFP/nompC[3];nompC-GAL4	LH+LH-NOMPC:GFP	121.439	46.0129
w*;nompC[3],UAS-LH+LH-NompC::GFP/nompC[3];nompC-GAL4	LH+LH-NOMPC:GFP	71.7593	45.9295
w*;nompC[3],UAS-LH+LH-NompC::GFP/nompC[3];nompC-GAL4	LH+LH-NOMPC:GFP	44.9742	47.7049
w*;nompC[3],UAS-LH+LH-NompC::GFP/nompC[3];nompC-GAL4	LH+LH-NOMPC:GFP	-58.9715	42.5869
w*;nompC[3],UAS-LH+LH-NompC::GFP/nompC[3];nompC-GAL4	LH+LH-NOMPC:GFP	-123.575	52.0135
w*;nompC[3],UAS-LH+LH-NompC::GFP/nompC[3];nompC-GAL4	LH+LH-NOMPC:GFP	-294.47	48.7759
w*;nompC[3],UAS-LH+LH-NompC::GFP/nompC[3];nompC-GAL4	LH+LH-NOMPC:GFP	-768.722	48.2931
w*;nompC[3],UAS-LH+LH-NompC::GFP/nompC[3];nompC-GAL4	LH+LH-NOMPC:GFP	-1247.62	47.5838
w*;nompC[3],UAS-LH+LH-NompC::GFP/nompC[3];nompC-GAL4	LH+LH-NOMPC:GFP	-1733.91	47.5145
w*;nompC[3],UAS-LH+LH-NompC::GFP/nompC[3];nompC-GAL4	LH+LH-NOMPC:GFP	-2148.93	48.6935
w*;nompC[3],UAS-LH+LH-NompC::GFP/nompC[3];nompC-GAL4	LH+LH-NOMPC:GFP	-2645.89	47.9195
w*;nompC[3],UAS-LH+LH-NompC::GFP/nompC[3];nompC-GAL4	LH+LH-NOMPC:GFP	-3986.63	47.9853
w*;nompC[3],UAS-LH+LH-NompC::GFP/nompC[3];nompC-GAL4	LH+LH-NOMPC:GFP	-7809.34	49.7556
w*;nompC[3],UAS-LH+LH-NompC::GFP/nompC[3];nompC-GAL4	LH+LH-NOMPC:GFP	-10218.1	50.6542
w*;nompC[3],UAS-LH+LH-NompC::GFP/nompC[3];nompC-GAL4	LH+LH-NOMPC:GFP	-14796.9	52.9104
w*;nompC[3],UAS-LH+LH-NompC::GFP/nompC[3];nompC-GAL4	LH+LH-NOMPC:GFP	13380.6	52.8642
w*;nompC[3],UAS-LH+LH-NompC::GFP/nompC[3];nompC-GAL4	LH+LH-NOMPC:GFP	9008.77	51.3603
w*;nompC[3],UAS-LH+LH-NompC::GFP/nompC[3];nompC-GAL4	LH+LH-NOMPC:GFP	6736.92	51.0616
w*;nompC[3],UAS-LH+LH-NompC::GFP/nompC[3];nompC-GAL4	LH+LH-NOMPC:GFP	3372.79	50.2494
w*;nompC[3],UAS-LH+LH-NompC::GFP/nompC[3];nompC-GAL4	LH+LH-NOMPC:GFP	2262.29	49.4936
w*;nompC[3],UAS-LH+LH-NompC::GFP/nompC[3];nompC-GAL4	LH+LH-NOMPC:GFP	1864.76	49.5365
w*;nompC[3],UAS-LH+LH-NompC::GFP/nompC[3];nompC-GAL4	LH+LH-NOMPC:GFP	1481.17	49.2774
w*;nompC[3],UAS-LH+LH-NompC::GFP/nompC[3];nompC-GAL4	LH+LH-NOMPC:GFP	1093.48	48.8037
w*;nompC[3],UAS-LH+LH-NompC::GFP/nompC[3];nompC-GAL4	LH+LH-NOMPC:GFP	692.113	48.5194
w*;nompC[3],UAS-LH+LH-NompC::GFP/nompC[3];nompC-GAL4	LH+LH-NOMPC:GFP	308.323	48.9881
w*;nompC[3],UAS-LH+LH-NompC::GFP/nompC[3];nompC-GAL4	LH+LH-NOMPC:GFP	169.563	48.3975
w*;nompC[3],UAS-LH+LH-NompC::GFP/nompC[3];nompC-GAL4	LH+LH-NOMPC:GFP	96.135	48.7985
w*;nompC[3],UAS-LH+LH-NompC::GFP/nompC[3];nompC-GAL4	LH+LH-NOMPC:GFP	55.36	49.0776
w*;nompC[3],UAS-LH+LH-NompC::GFP/nompC[3];nompC-GAL4	LH+LH-NOMPC:GFP	37.1193	48.4965
w*;nompC[3],UAS-LH+LH-NompC::GFP/nompC[3];nompC-GAL4	LH+LH-NOMPC:GFP	-109.922	48.6958
w*;nompC[3],UAS-LH+LH-NompC::GFP/nompC[3];nompC-GAL4	LH+LH-NOMPC:GFP	-244.46	47.2065
w*;nompC[3],UAS-LH+LH-NompC::GFP/nompC[3];nompC-GAL4	LH+LH-NOMPC:GFP	-633.914	48.9944
w*;nompC[3],UAS-LH+LH-NompC::GFP/nompC[3];nompC-GAL4	LH+LH-NOMPC:GFP	-1018.87	49.1729
w*;nompC[3],UAS-LH+LH-NompC::GFP/nompC[3];nompC-GAL4	LH+LH-NOMPC:GFP	-1391.53	50.3703
w*;nompC[3],UAS-LH+LH-NompC::GFP/nompC[3];nompC-GAL4	LH+LH-NOMPC:GFP	-1776.48	49.9147
w*;nompC[3],UAS-LH+LH-NompC::GFP/nompC[3];nompC-GAL4	LH+LH-NOMPC:GFP	-2137.5	50.3203
w*;nompC[3],UAS-LH+LH-NompC::GFP/nompC[3];nompC-GAL4	LH+LH-NOMPC:GFP	-3197.67	50.8932
w*;nompC[3],UAS-LH+LH-NompC::GFP/nompC[3];nompC-GAL4	LH+LH-NOMPC:GFP	-6281.5	52.2162
w*;nompC[3],UAS-LH+LH-NompC::GFP/nompC[3];nompC-GAL4	LH+LH-NOMPC:GFP	-8192.64	53.1124
w*;nompC[3],UAS-LH+LH-NompC::GFP/nompC[3];nompC-GAL4	LH+LH-NOMPC:GFP	-11923.8	54.1789
w*;nompC[3],UAS-LH+LH-NompC::GFP/nompC[3];nompC-GAL4	LH+LH-NOMPC:GFP	15252.9	46.3781
w*;nompC[3],UAS-LH+LH-NompC::GFP/nompC[3];nompC-GAL4	LH+LH-NOMPC:GFP	10123.9	46.4744
w*;nompC[3],UAS-LH+LH-NompC::GFP/nompC[3];nompC-GAL4	LH+LH-NOMPC:GFP	7480.74	46.8737
w*;nompC[3],UAS-LH+LH-NompC::GFP/nompC[3];nompC-GAL4	LH+LH-NOMPC:GFP	3654.1	47.914
w*;nompC[3],UAS-LH+LH-NompC::GFP/nompC[3];nompC-GAL4	LH+LH-NOMPC:GFP	2389.5	48.6869
w*;nompC[3],UAS-LH+LH-NompC::GFP/nompC[3];nompC-GAL4	LH+LH-NOMPC:GFP	1960.74	49.2027
w*;nompC[3],UAS-LH+LH-NompC::GFP/nompC[3];nompC-GAL4	LH+LH-NOMPC:GFP	1558.55	48.9479
w*;nompC[3],UAS-LH+LH-NompC::GFP/nompC[3];nompC-GAL4	LH+LH-NOMPC:GFP	1127.57	49.0308
w*;nompC[3],UAS-LH+LH-NompC::GFP/nompC[3];nompC-GAL4	LH+LH-NOMPC:GFP	694.439	51.4628
w*;nompC[3],UAS-LH+LH-NompC::GFP/nompC[3];nompC-GAL4	LH+LH-NOMPC:GFP	298.734	48.233
w*;nompC[3],UAS-LH+LH-NompC::GFP/nompC[3];nompC-GAL4	LH+LH-NOMPC:GFP	147.083	46.7903
w*;nompC[3],UAS-LH+LH-NompC::GFP/nompC[3];nompC-GAL4	LH+LH-NOMPC:GFP	71.59	50.0939
w*;nompC[3],UAS-LH+LH-NompC::GFP/nompC[3];nompC-GAL4	LH+LH-NOMPC:GFP	37.4013	52.7096
w*;nompC[3],UAS-LH+LH-NompC::GFP/nompC[3];nompC-GAL4	LH+LH-NOMPC:GFP	17.6585	51.9783
w*;nompC[3],UAS-LH+LH-NompC::GFP/nompC[3];nompC-GAL4	LH+LH-NOMPC:GFP	-34.6214	49.4397
w*;nompC[3],UAS-LH+LH-NompC::GFP/nompC[3];nompC-GAL4	LH+LH-NOMPC:GFP	-73.7289	46.5555
w*;nompC[3],UAS-LH+LH-NompC::GFP/nompC[3];nompC-GAL4	LH+LH-NOMPC:GFP	-145.475	51.298
w*;nompC[3],UAS-LH+LH-NompC::GFP/nompC[3];nompC-GAL4	LH+LH-NOMPC:GFP	-289.045	49.1771
w*;nompC[3],UAS-LH+LH-NompC::GFP/nompC[3];nompC-GAL4	LH+LH-NOMPC:GFP	-710.174	48.7302
w*;nompC[3],UAS-LH+LH-NompC::GFP/nompC[3];nompC-GAL4	LH+LH-NOMPC:GFP	-1107.85	50.9368
w*;nompC[3],UAS-LH+LH-NompC::GFP/nompC[3];nompC-GAL4	LH+LH-NOMPC:GFP	-1504.89	51.0755
w*;nompC[3],UAS-LH+LH-NompC::GFP/nompC[3];nompC-GAL4	LH+LH-NOMPC:GFP	-1888.45	50.6087
w*;nompC[3],UAS-LH+LH-NompC::GFP/nompC[3];nompC-GAL4	LH+LH-NOMPC:GFP	-2306.28	51.4696
w*;nompC[3],UAS-LH+LH-NompC::GFP/nompC[3];nompC-GAL4	LH+LH-NOMPC:GFP	-3447.81	51.2077
w*;nompC[3],UAS-LH+LH-NompC::GFP/nompC[3];nompC-GAL4	LH+LH-NOMPC:GFP	-6646.79	52.7659
w*;nompC[3],UAS-LH+LH-NompC::GFP/nompC[3];nompC-GAL4	LH+LH-NOMPC:GFP	-8616.01	54.0059
w*;nompC[3],UAS-LH+LH-NompC::GFP/nompC[3];nompC-GAL4	LH+LH-NOMPC:GFP	-12048	57.9531
w*;nompC[3],UAS-LH+LH-NompC::GFP/nompC[3];nompC-GAL4	LH+LH-NOMPC:GFP	13030.5	49.9091
w*;nompC[3],UAS-LH+LH-NompC::GFP/nompC[3];nompC-GAL4	LH+LH-NOMPC:GFP	8670.65	48.1118
w*;nompC[3],UAS-LH+LH-NompC::GFP/nompC[3];nompC-GAL4	LH+LH-NOMPC:GFP	6505.18	49.0161
w*;nompC[3],UAS-LH+LH-NompC::GFP/nompC[3];nompC-GAL4	LH+LH-NOMPC:GFP	3284.25	48.7562
w*;nompC[3],UAS-LH+LH-NompC::GFP/nompC[3];nompC-GAL4	LH+LH-NOMPC:GFP	2171.06	48.5814
w*;nompC[3],UAS-LH+LH-NompC::GFP/nompC[3];nompC-GAL4	LH+LH-NOMPC:GFP	1771.78	48.8658
w*;nompC[3],UAS-LH+LH-NompC::GFP/nompC[3];nompC-GAL4	LH+LH-NOMPC:GFP	1415.46	48.1712
w*;nompC[3],UAS-LH+LH-NompC::GFP/nompC[3];nompC-GAL4	LH+LH-NOMPC:GFP	1031.42	48.2234
w*;nompC[3],UAS-LH+LH-NompC::GFP/nompC[3];nompC-GAL4	LH+LH-NOMPC:GFP	657.609	46.724
w*;nompC[3],UAS-LH+LH-NompC::GFP/nompC[3];nompC-GAL4	LH+LH-NOMPC:GFP	265.755	48.4564
w*;nompC[3],UAS-LH+LH-NompC::GFP/nompC[3];nompC-GAL4	LH+LH-NOMPC:GFP	134.881	49.724
w*;nompC[3],UAS-LH+LH-NompC::GFP/nompC[3];nompC-GAL4	LH+LH-NOMPC:GFP	64.0888	52.9273
w*;nompC[3],UAS-LH+LH-NompC::GFP/nompC[3];nompC-GAL4	LH+LH-NOMPC:GFP	34.4943	44.9575
w*;nompC[3],UAS-LH+LH-NompC::GFP/nompC[3];nompC-GAL4	LH+LH-NOMPC:GFP	17.6336	38.0632
w*;nompC[3],UAS-LH+LH-NompC::GFP/nompC[3];nompC-GAL4	LH+LH-NOMPC:GFP	-34.3346	48.5577
w*;nompC[3],UAS-LH+LH-NompC::GFP/nompC[3];nompC-GAL4	LH+LH-NOMPC:GFP	-65.0531	47.2011
w*;nompC[3],UAS-LH+LH-NompC::GFP/nompC[3];nompC-GAL4	LH+LH-NOMPC:GFP	-126.47	50.6077
w*;nompC[3],UAS-LH+LH-NompC::GFP/nompC[3];nompC-GAL4	LH+LH-NOMPC:GFP	-265.645	49.8682
w*;nompC[3],UAS-LH+LH-NompC::GFP/nompC[3];nompC-GAL4	LH+LH-NOMPC:GFP	-645.525	48.402
w*;nompC[3],UAS-LH+LH-NompC::GFP/nompC[3];nompC-GAL4	LH+LH-NOMPC:GFP	-1012.88	48.1071
w*;nompC[3],UAS-LH+LH-NompC::GFP/nompC[3];nompC-GAL4	LH+LH-NOMPC:GFP	-1387.14	50.1291
w*;nompC[3],UAS-LH+LH-NompC::GFP/nompC[3];nompC-GAL4	LH+LH-NOMPC:GFP	-1734.55	50.1406
w*;nompC[3],UAS-LH+LH-NompC::GFP/nompC[3];nompC-GAL4	LH+LH-NOMPC:GFP	-2105.01	50.5402
w*;nompC[3],UAS-LH+LH-NompC::GFP/nompC[3];nompC-GAL4	LH+LH-NOMPC:GFP	-3149.06	50.8708
w*;nompC[3],UAS-LH+LH-NompC::GFP/nompC[3];nompC-GAL4	LH+LH-NOMPC:GFP	-6087.75	51.7014
w*;nompC[3],UAS-LH+LH-NompC::GFP/nompC[3];nompC-GAL4	LH+LH-NOMPC:GFP	-7947.04	53.7049
w*;nompC[3],UAS-LH+LH-NompC::GFP/nompC[3];nompC-GAL4	LH+LH-NOMPC:GFP	-11360.1	55.7234
w*;nompC[3],UAS-LH+LH-NompC::GFP/nompC[3];nompC-GAL4	LH+LH-NOMPC:GFP	13048.9	51.8291
w*;nompC[3],UAS-LH+LH-NompC::GFP/nompC[3];nompC-GAL4	LH+LH-NOMPC:GFP	8879.27	50.5849
w*;nompC[3],UAS-LH+LH-NompC::GFP/nompC[3];nompC-GAL4	LH+LH-NOMPC:GFP	6699.2	50.6284
w*;nompC[3],UAS-LH+LH-NompC::GFP/nompC[3];nompC-GAL4	LH+LH-NOMPC:GFP	3377.79	49.5739
w*;nompC[3],UAS-LH+LH-NompC::GFP/nompC[3];nompC-GAL4	LH+LH-NOMPC:GFP	2238.54	50.2606
w*;nompC[3],UAS-LH+LH-NompC::GFP/nompC[3];nompC-GAL4	LH+LH-NOMPC:GFP	1850.16	49.4528
w*;nompC[3],UAS-LH+LH-NompC::GFP/nompC[3];nompC-GAL4	LH+LH-NOMPC:GFP	1473.89	49.2644
w*;nompC[3],UAS-LH+LH-NompC::GFP/nompC[3];nompC-GAL4	LH+LH-NOMPC:GFP	1078.11	48.7093
w*;nompC[3],UAS-LH+LH-NompC::GFP/nompC[3];nompC-GAL4	LH+LH-NOMPC:GFP	677.746	49.4419
w*;nompC[3],UAS-LH+LH-NompC::GFP/nompC[3];nompC-GAL4	LH+LH-NOMPC:GFP	278.098	48.8563
w*;nompC[3],UAS-LH+LH-NompC::GFP/nompC[3];nompC-GAL4	LH+LH-NOMPC:GFP	142.417	48.0172
w*;nompC[3],UAS-LH+LH-NompC::GFP/nompC[3];nompC-GAL4	LH+LH-NOMPC:GFP	-69.8498	48.6898
w*;nompC[3],UAS-LH+LH-NompC::GFP/nompC[3];nompC-GAL4	LH+LH-NOMPC:GFP	-139.821	49.6321
w*;nompC[3],UAS-LH+LH-NompC::GFP/nompC[3];nompC-GAL4	LH+LH-NOMPC:GFP	-278.22	49.7165
w*;nompC[3],UAS-LH+LH-NompC::GFP/nompC[3];nompC-GAL4	LH+LH-NOMPC:GFP	-684.47	48.898
w*;nompC[3],UAS-LH+LH-NompC::GFP/nompC[3];nompC-GAL4	LH+LH-NOMPC:GFP	-1069.36	48.9799
w*;nompC[3],UAS-LH+LH-NompC::GFP/nompC[3];nompC-GAL4	LH+LH-NOMPC:GFP	-1456.9	49.9433
w*;nompC[3],UAS-LH+LH-NompC::GFP/nompC[3];nompC-GAL4	LH+LH-NOMPC:GFP	-1847.61	50.1226
w*;nompC[3],UAS-LH+LH-NompC::GFP/nompC[3];nompC-GAL4	LH+LH-NOMPC:GFP	-2204.08	50.6221
w*;nompC[3],UAS-LH+LH-NompC::GFP/nompC[3];nompC-GAL4	LH+LH-NOMPC:GFP	-3325.53	50.0908
w*;nompC[3],UAS-LH+LH-NompC::GFP/nompC[3];nompC-GAL4	LH+LH-NOMPC:GFP	-6553.06	51.2712
w*;nompC[3],UAS-LH+LH-NompC::GFP/nompC[3];nompC-GAL4	LH+LH-NOMPC:GFP	-8642	51.7568
w*;nompC[3],UAS-LH+LH-NompC::GFP/nompC[3];nompC-GAL4	LH+LH-NOMPC:GFP	-12581.4	53.6581
w*;nompC[3],UAS-LH+LH-NompC::GFP/nompC[3];nompC-GAL4	LH+LH-NOMPC:GFP	13303.4	50.527
w*;nompC[3],UAS-LH+LH-NompC::GFP/nompC[3];nompC-GAL4	LH+LH-NOMPC:GFP	9051.67	49.5887
w*;nompC[3],UAS-LH+LH-NompC::GFP/nompC[3];nompC-GAL4	LH+LH-NOMPC:GFP	6755.07	49.5796
w*;nompC[3],UAS-LH+LH-NompC::GFP/nompC[3];nompC-GAL4	LH+LH-NOMPC:GFP	3384.98	48.7438
w*;nompC[3],UAS-LH+LH-NompC::GFP/nompC[3];nompC-GAL4	LH+LH-NOMPC:GFP	2277.32	48.9492
w*;nompC[3],UAS-LH+LH-NompC::GFP/nompC[3];nompC-GAL4	LH+LH-NOMPC:GFP	1873.03	48.8017
w*;nompC[3],UAS-LH+LH-NompC::GFP/nompC[3];nompC-GAL4	LH+LH-NOMPC:GFP	1460.72	49.2172
w*;nompC[3],UAS-LH+LH-NompC::GFP/nompC[3];nompC-GAL4	LH+LH-NOMPC:GFP	1094.96	46.9424
w*;nompC[3],UAS-LH+LH-NompC::GFP/nompC[3];nompC-GAL4	LH+LH-NOMPC:GFP	685.574	47.8483
w*;nompC[3],UAS-LH+LH-NompC::GFP/nompC[3];nompC-GAL4	LH+LH-NOMPC:GFP	270.949	50.7909
w*;nompC[3],UAS-LH+LH-NompC::GFP/nompC[3];nompC-GAL4	LH+LH-NOMPC:GFP	-265.312	50.926
w*;nompC[3],UAS-LH+LH-NompC::GFP/nompC[3];nompC-GAL4	LH+LH-NOMPC:GFP	-674.224	49.046
w*;nompC[3],UAS-LH+LH-NompC::GFP/nompC[3];nompC-GAL4	LH+LH-NOMPC:GFP	-1013.92	52.2734
w*;nompC[3],UAS-LH+LH-NompC::GFP/nompC[3];nompC-GAL4	LH+LH-NOMPC:GFP	-1456.17	49.3346
w*;nompC[3],UAS-LH+LH-NompC::GFP/nompC[3];nompC-GAL4	LH+LH-NOMPC:GFP	-1841.42	50.0053
w*;nompC[3],UAS-LH+LH-NompC::GFP/nompC[3];nompC-GAL4	LH+LH-NOMPC:GFP	-2231.37	49.3339
w*;nompC[3],UAS-LH+LH-NompC::GFP/nompC[3];nompC-GAL4	LH+LH-NOMPC:GFP	-3339.92	49.7884
w*;nompC[3],UAS-LH+LH-NompC::GFP/nompC[3];nompC-GAL4	LH+LH-NOMPC:GFP	-6617.79	50.913
w*;nompC[3],UAS-LH+LH-NompC::GFP/nompC[3];nompC-GAL4	LH+LH-NOMPC:GFP	-8593.99	52.5308
w*;nompC[3],UAS-LH+LH-NompC::GFP/nompC[3];nompC-GAL4	LH+LH-NOMPC:GFP	-12414.8	54.8599
w*;nompC[1],UAS-AR+AR-NompC::GFP/nompC[3];nompC-GAL4	AR+AR-NOMPC:GFP	10073.3	56.2827
w*;nompC[1],UAS-AR+AR-NompC::GFP/nompC[3];nompC-GAL4	AR+AR-NOMPC:GFP	6764.61	53.451
w*;nompC[1],UAS-AR+AR-NompC::GFP/nompC[3];nompC-GAL4	AR+AR-NOMPC:GFP	5021.47	53.4435
w*;nompC[1],UAS-AR+AR-NompC::GFP/nompC[3];nompC-GAL4	AR+AR-NOMPC:GFP	2475.27	52.8668
w*;nompC[1],UAS-AR+AR-NompC::GFP/nompC[3];nompC-GAL4	AR+AR-NOMPC:GFP	1630.02	53.365
w*;nompC[1],UAS-AR+AR-NompC::GFP/nompC[3];nompC-GAL4	AR+AR-NOMPC:GFP	1332.3	53.4493
w*;nompC[1],UAS-AR+AR-NompC::GFP/nompC[3];nompC-GAL4	AR+AR-NOMPC:GFP	1078.5	52.551
w*;nompC[1],UAS-AR+AR-NompC::GFP/nompC[3];nompC-GAL4	AR+AR-NOMPC:GFP	793.12	52.0881
w*;nompC[1],UAS-AR+AR-NompC::GFP/nompC[3];nompC-GAL4	AR+AR-NOMPC:GFP	515.954	51.3567
w*;nompC[1],UAS-AR+AR-NompC::GFP/nompC[3];nompC-GAL4	AR+AR-NOMPC:GFP	259.163	45.5267
w*;nompC[1],UAS-AR+AR-NompC::GFP/nompC[3];nompC-GAL4	AR+AR-NOMPC:GFP	136.963	47.5485
w*;nompC[1],UAS-AR+AR-NompC::GFP/nompC[3];nompC-GAL4	AR+AR-NOMPC:GFP	78.4161	48.3854
w*;nompC[1],UAS-AR+AR-NompC::GFP/nompC[3];nompC-GAL4	AR+AR-NOMPC:GFP	43.6154	51.2985
w*;nompC[1],UAS-AR+AR-NompC::GFP/nompC[3];nompC-GAL4	AR+AR-NOMPC:GFP	31.5938	46.8198
w*;nompC[1],UAS-AR+AR-NompC::GFP/nompC[3];nompC-GAL4	AR+AR-NOMPC:GFP	-36.743	44.3413
w*;nompC[1],UAS-AR+AR-NompC::GFP/nompC[3];nompC-GAL4	AR+AR-NOMPC:GFP	-91.0931	45.2063
w*;nompC[1],UAS-AR+AR-NompC::GFP/nompC[3];nompC-GAL4	AR+AR-NOMPC:GFP	-194.122	47.7583
w*;nompC[1],UAS-AR+AR-NompC::GFP/nompC[3];nompC-GAL4	AR+AR-NOMPC:GFP	-475.064	49.8248
w*;nompC[1],UAS-AR+AR-NompC::GFP/nompC[3];nompC-GAL4	AR+AR-NOMPC:GFP	-747.991	50.9792
w*;nompC[1],UAS-AR+AR-NompC::GFP/nompC[3];nompC-GAL4	AR+AR-NOMPC:GFP	-1020.27	51.9672
w*;nompC[1],UAS-AR+AR-NompC::GFP/nompC[3];nompC-GAL4	AR+AR-NOMPC:GFP	-1279.86	52.0131
w*;nompC[1],UAS-AR+AR-NompC::GFP/nompC[3];nompC-GAL4	AR+AR-NOMPC:GFP	-1568.7	51.4701
w*;nompC[1],UAS-AR+AR-NompC::GFP/nompC[3];nompC-GAL4	AR+AR-NOMPC:GFP	-2330.06	51.4286
w*;nompC[1],UAS-AR+AR-NompC::GFP/nompC[3];nompC-GAL4	AR+AR-NOMPC:GFP	-4913.59	47.6882
w*;nompC[1],UAS-AR+AR-NompC::GFP/nompC[3];nompC-GAL4	AR+AR-NOMPC:GFP	-6584.51	46.2433
w*;nompC[1],UAS-AR+AR-NompC::GFP/nompC[3];nompC-GAL4	AR+AR-NOMPC:GFP	-10162.2	42.6469
w*;nompC[1],UAS-AR+AR-NompC::GFP/nompC[3];nompC-GAL4	AR+AR-NOMPC:GFP	13183.6	46.0953
w*;nompC[1],UAS-AR+AR-NompC::GFP/nompC[3];nompC-GAL4	AR+AR-NOMPC:GFP	8265.28	47.7675
w*;nompC[1],UAS-AR+AR-NompC::GFP/nompC[3];nompC-GAL4	AR+AR-NOMPC:GFP	5990.87	48.8994
w*;nompC[1],UAS-AR+AR-NompC::GFP/nompC[3];nompC-GAL4	AR+AR-NOMPC:GFP	2836.7	50.4838
w*;nompC[1],UAS-AR+AR-NompC::GFP/nompC[3];nompC-GAL4	AR+AR-NOMPC:GFP	1858.53	51.2689
w*;nompC[1],UAS-AR+AR-NompC::GFP/nompC[3];nompC-GAL4	AR+AR-NOMPC:GFP	1505.62	52.1034
w*;nompC[1],UAS-AR+AR-NompC::GFP/nompC[3];nompC-GAL4	AR+AR-NOMPC:GFP	1199.23	51.5915
w*;nompC[1],UAS-AR+AR-NompC::GFP/nompC[3];nompC-GAL4	AR+AR-NOMPC:GFP	881.17	51.5992
w*;nompC[1],UAS-AR+AR-NompC::GFP/nompC[3];nompC-GAL4	AR+AR-NOMPC:GFP	565.435	51.0656
w*;nompC[1],UAS-AR+AR-NompC::GFP/nompC[3];nompC-GAL4	AR+AR-NOMPC:GFP	248.513	52.1262
w*;nompC[1],UAS-AR+AR-NompC::GFP/nompC[3];nompC-GAL4	AR+AR-NOMPC:GFP	144.804	47.6213
w*;nompC[1],UAS-AR+AR-NompC::GFP/nompC[3];nompC-GAL4	AR+AR-NOMPC:GFP	80.3241	50.4521
w*;nompC[1],UAS-AR+AR-NompC::GFP/nompC[3];nompC-GAL4	AR+AR-NOMPC:GFP	46.8484	50.8699
w*;nompC[1],UAS-AR+AR-NompC::GFP/nompC[3];nompC-GAL4	AR+AR-NOMPC:GFP	34.5859	46.6264
w*;nompC[1],UAS-AR+AR-NompC::GFP/nompC[3];nompC-GAL4	AR+AR-NOMPC:GFP	-9.53663	46.2881
w*;nompC[1],UAS-AR+AR-NompC::GFP/nompC[3];nompC-GAL4	AR+AR-NOMPC:GFP	-41.1659	44.5896
w*;nompC[1],UAS-AR+AR-NompC::GFP/nompC[3];nompC-GAL4	AR+AR-NOMPC:GFP	-96.0968	48.0211
w*;nompC[1],UAS-AR+AR-NompC::GFP/nompC[3];nompC-GAL4	AR+AR-NOMPC:GFP	-206.241	49.1628
w*;nompC[1],UAS-AR+AR-NompC::GFP/nompC[3];nompC-GAL4	AR+AR-NOMPC:GFP	-517.156	50.6788
w*;nompC[1],UAS-AR+AR-NompC::GFP/nompC[3];nompC-GAL4	AR+AR-NOMPC:GFP	-817.598	51.533
w*;nompC[1],UAS-AR+AR-NompC::GFP/nompC[3];nompC-GAL4	AR+AR-NOMPC:GFP	-1104.83	52.5227
w*;nompC[1],UAS-AR+AR-NompC::GFP/nompC[3];nompC-GAL4	AR+AR-NOMPC:GFP	-1393.36	52.8726
w*;nompC[1],UAS-AR+AR-NompC::GFP/nompC[3];nompC-GAL4	AR+AR-NOMPC:GFP	-1670.52	53.5854
w*;nompC[1],UAS-AR+AR-NompC::GFP/nompC[3];nompC-GAL4	AR+AR-NOMPC:GFP	-2531.65	52.7466
w*;nompC[1],UAS-AR+AR-NompC::GFP/nompC[3];nompC-GAL4	AR+AR-NOMPC:GFP	-5144.33	50.9679
w*;nompC[1],UAS-AR+AR-NompC::GFP/nompC[3];nompC-GAL4	AR+AR-NOMPC:GFP	-6910.69	49.8628
w*;nompC[1],UAS-AR+AR-NompC::GFP/nompC[3];nompC-GAL4	AR+AR-NOMPC:GFP	-10301	48.5983
w*;nompC[1],UAS-AR+AR-NompC::GFP/nompC[3];nompC-GAL4	AR+AR-NOMPC:GFP	17861.4	51.9977
w*;nompC[1],UAS-AR+AR-NompC::GFP/nompC[3];nompC-GAL4	AR+AR-NOMPC:GFP	11511.3	49.793
w*;nompC[1],UAS-AR+AR-NompC::GFP/nompC[3];nompC-GAL4	AR+AR-NOMPC:GFP	8740.17	49.0005
w*;nompC[1],UAS-AR+AR-NompC::GFP/nompC[3];nompC-GAL4	AR+AR-NOMPC:GFP	3997.87	50.7891
w*;nompC[1],UAS-AR+AR-NompC::GFP/nompC[3];nompC-GAL4	AR+AR-NOMPC:GFP	2480.04	53.5057
w*;nompC[1],UAS-AR+AR-NompC::GFP/nompC[3];nompC-GAL4	AR+AR-NOMPC:GFP	2125.88	51.6966
w*;nompC[1],UAS-AR+AR-NompC::GFP/nompC[3];nompC-GAL4	AR+AR-NOMPC:GFP	1665.8	52.524
w*;nompC[1],UAS-AR+AR-NompC::GFP/nompC[3];nompC-GAL4	AR+AR-NOMPC:GFP	1234.65	52.1753
w*;nompC[1],UAS-AR+AR-NompC::GFP/nompC[3];nompC-GAL4	AR+AR-NOMPC:GFP	736.331	55.8344
w*;nompC[1],UAS-AR+AR-NompC::GFP/nompC[3];nompC-GAL4	AR+AR-NOMPC:GFP	351.232	50.829
w*;nompC[1],UAS-AR+AR-NompC::GFP/nompC[3];nompC-GAL4	AR+AR-NOMPC:GFP	212.621	45.1698
w*;nompC[1],UAS-AR+AR-NompC::GFP/nompC[3];nompC-GAL4	AR+AR-NOMPC:GFP	128.016	44.3629
w*;nompC[1],UAS-AR+AR-NompC::GFP/nompC[3];nompC-GAL4	AR+AR-NOMPC:GFP	81.2639	39.2303
w*;nompC[1],UAS-AR+AR-NompC::GFP/nompC[3];nompC-GAL4	AR+AR-NOMPC:GFP	45.2041	49.0732
w*;nompC[1],UAS-AR+AR-NompC::GFP/nompC[3];nompC-GAL4	AR+AR-NOMPC:GFP	-55.4371	43.617
w*;nompC[1],UAS-AR+AR-NompC::GFP/nompC[3];nompC-GAL4	AR+AR-NOMPC:GFP	-132.21	48.147
w*;nompC[1],UAS-AR+AR-NompC::GFP/nompC[3];nompC-GAL4	AR+AR-NOMPC:GFP	-265.459	53.6626
w*;nompC[1],UAS-AR+AR-NompC::GFP/nompC[3];nompC-GAL4	AR+AR-NOMPC:GFP	-723.431	51.1486
w*;nompC[1],UAS-AR+AR-NompC::GFP/nompC[3];nompC-GAL4	AR+AR-NOMPC:GFP	-1134.73	51.8023
w*;nompC[1],UAS-AR+AR-NompC::GFP/nompC[3];nompC-GAL4	AR+AR-NOMPC:GFP	-1536	53.2598
w*;nompC[1],UAS-AR+AR-NompC::GFP/nompC[3];nompC-GAL4	AR+AR-NOMPC:GFP	-1880.38	53.3309
w*;nompC[1],UAS-AR+AR-NompC::GFP/nompC[3];nompC-GAL4	AR+AR-NOMPC:GFP	-2339.25	53.0276
w*;nompC[1],UAS-AR+AR-NompC::GFP/nompC[3];nompC-GAL4	AR+AR-NOMPC:GFP	-3714.92	50.0381
w*;nompC[1],UAS-AR+AR-NompC::GFP/nompC[3];nompC-GAL4	AR+AR-NOMPC:GFP	-7216.27	49.6001
w*;nompC[1],UAS-AR+AR-NompC::GFP/nompC[3];nompC-GAL4	AR+AR-NOMPC:GFP	-9247.35	48.6841
w*;nompC[1],UAS-AR+AR-NompC::GFP/nompC[3];nompC-GAL4	AR+AR-NOMPC:GFP	-13195.8	47.7001
w*;nompC[1],UAS-AR+AR-NompC::GFP/nompC[3];nompC-GAL4	AR+AR-NOMPC:GFP	12095.8	50.0167
w*;nompC[1],UAS-AR+AR-NompC::GFP/nompC[3];nompC-GAL4	AR+AR-NOMPC:GFP	7832.91	50.1976
w*;nompC[1],UAS-AR+AR-NompC::GFP/nompC[3];nompC-GAL4	AR+AR-NOMPC:GFP	5696.22	51.3673
w*;nompC[1],UAS-AR+AR-NompC::GFP/nompC[3];nompC-GAL4	AR+AR-NOMPC:GFP	2688.98	53.0844
w*;nompC[1],UAS-AR+AR-NompC::GFP/nompC[3];nompC-GAL4	AR+AR-NOMPC:GFP	1783.37	53.1397
w*;nompC[1],UAS-AR+AR-NompC::GFP/nompC[3];nompC-GAL4	AR+AR-NOMPC:GFP	1431.76	54.3319
w*;nompC[1],UAS-AR+AR-NompC::GFP/nompC[3];nompC-GAL4	AR+AR-NOMPC:GFP	1141.19	53.3948
w*;nompC[1],UAS-AR+AR-NompC::GFP/nompC[3];nompC-GAL4	AR+AR-NOMPC:GFP	839.926	53.2673
w*;nompC[1],UAS-AR+AR-NompC::GFP/nompC[3];nompC-GAL4	AR+AR-NOMPC:GFP	538.553	53.113
w*;nompC[1],UAS-AR+AR-NompC::GFP/nompC[3];nompC-GAL4	AR+AR-NOMPC:GFP	232.926	54.4379
w*;nompC[1],UAS-AR+AR-NompC::GFP/nompC[3];nompC-GAL4	AR+AR-NOMPC:GFP	122.267	56.0169
w*;nompC[1],UAS-AR+AR-NompC::GFP/nompC[3];nompC-GAL4	AR+AR-NOMPC:GFP	65.645	60.1223
w*;nompC[1],UAS-AR+AR-NompC::GFP/nompC[3];nompC-GAL4	AR+AR-NOMPC:GFP	-61.7002	30.0836
w*;nompC[1],UAS-AR+AR-NompC::GFP/nompC[3];nompC-GAL4	AR+AR-NOMPC:GFP	-117.383	38.3065
w*;nompC[1],UAS-AR+AR-NompC::GFP/nompC[3];nompC-GAL4	AR+AR-NOMPC:GFP	-226.389	43.2302
w*;nompC[1],UAS-AR+AR-NompC::GFP/nompC[3];nompC-GAL4	AR+AR-NOMPC:GFP	-531.729	48.7783
w*;nompC[1],UAS-AR+AR-NompC::GFP/nompC[3];nompC-GAL4	AR+AR-NOMPC:GFP	-822.388	50.6351
w*;nompC[1],UAS-AR+AR-NompC::GFP/nompC[3];nompC-GAL4	AR+AR-NOMPC:GFP	-1126.17	50.9783
w*;nompC[1],UAS-AR+AR-NompC::GFP/nompC[3];nompC-GAL4	AR+AR-NOMPC:GFP	-1418.54	51.1812
w*;nompC[1],UAS-AR+AR-NompC::GFP/nompC[3];nompC-GAL4	AR+AR-NOMPC:GFP	-1725.41	50.6983
w*;nompC[1],UAS-AR+AR-NompC::GFP/nompC[3];nompC-GAL4	AR+AR-NOMPC:GFP	-2598.56	51.118
w*;nompC[1],UAS-AR+AR-NompC::GFP/nompC[3];nompC-GAL4	AR+AR-NOMPC:GFP	-5337.01	48.101
w*;nompC[1],UAS-AR+AR-NompC::GFP/nompC[3];nompC-GAL4	AR+AR-NOMPC:GFP	-7047.95	47.3339
w*;nompC[1],UAS-AR+AR-NompC::GFP/nompC[3];nompC-GAL4	AR+AR-NOMPC:GFP	-10203.5	47.066
w*;nompC[1],UAS-AR+AR-NompC::GFP/nompC[3];nompC-GAL4	AR+AR-NOMPC:GFP	11691.2	51.9222
w*;nompC[1],UAS-AR+AR-NompC::GFP/nompC[3];nompC-GAL4	AR+AR-NOMPC:GFP	7716.54	50.5717
w*;nompC[1],UAS-AR+AR-NompC::GFP/nompC[3];nompC-GAL4	AR+AR-NOMPC:GFP	5669.45	50.2548
w*;nompC[1],UAS-AR+AR-NompC::GFP/nompC[3];nompC-GAL4	AR+AR-NOMPC:GFP	2783.63	49.7567
w*;nompC[1],UAS-AR+AR-NompC::GFP/nompC[3];nompC-GAL4	AR+AR-NOMPC:GFP	1828.95	49.9241
w*;nompC[1],UAS-AR+AR-NompC::GFP/nompC[3];nompC-GAL4	AR+AR-NOMPC:GFP	1503.86	50.2629
w*;nompC[1],UAS-AR+AR-NompC::GFP/nompC[3];nompC-GAL4	AR+AR-NOMPC:GFP	1165.44	51.0425
w*;nompC[1],UAS-AR+AR-NompC::GFP/nompC[3];nompC-GAL4	AR+AR-NOMPC:GFP	863.272	50.5376
w*;nompC[1],UAS-AR+AR-NompC::GFP/nompC[3];nompC-GAL4	AR+AR-NOMPC:GFP	550.737	50.4053
w*;nompC[1],UAS-AR+AR-NompC::GFP/nompC[3];nompC-GAL4	AR+AR-NOMPC:GFP	251.464	49.3455
w*;nompC[1],UAS-AR+AR-NompC::GFP/nompC[3];nompC-GAL4	AR+AR-NOMPC:GFP	146.184	46.4633
w*;nompC[1],UAS-AR+AR-NompC::GFP/nompC[3];nompC-GAL4	AR+AR-NOMPC:GFP	79.9564	48.3899
w*;nompC[1],UAS-AR+AR-NompC::GFP/nompC[3];nompC-GAL4	AR+AR-NOMPC:GFP	44.0309	53.4961
w*;nompC[1],UAS-AR+AR-NompC::GFP/nompC[3];nompC-GAL4	AR+AR-NOMPC:GFP	29.1997	50.7384
w*;nompC[1],UAS-AR+AR-NompC::GFP/nompC[3];nompC-GAL4	AR+AR-NOMPC:GFP	-8.16359	47.3275
w*;nompC[1],UAS-AR+AR-NompC::GFP/nompC[3];nompC-GAL4	AR+AR-NOMPC:GFP	-30.8606	52.8373
w*;nompC[1],UAS-AR+AR-NompC::GFP/nompC[3];nompC-GAL4	AR+AR-NOMPC:GFP	-89.335	49.2684
w*;nompC[1],UAS-AR+AR-NompC::GFP/nompC[3];nompC-GAL4	AR+AR-NOMPC:GFP	-185.656	51.4392
w*;nompC[1],UAS-AR+AR-NompC::GFP/nompC[3];nompC-GAL4	AR+AR-NOMPC:GFP	-494.444	50.6173
w*;nompC[1],UAS-AR+AR-NompC::GFP/nompC[3];nompC-GAL4	AR+AR-NOMPC:GFP	-780.627	51.4549
w*;nompC[1],UAS-AR+AR-NompC::GFP/nompC[3];nompC-GAL4	AR+AR-NOMPC:GFP	-1066.31	51.8252
w*;nompC[1],UAS-AR+AR-NompC::GFP/nompC[3];nompC-GAL4	AR+AR-NOMPC:GFP	-1374.4	51.0651
w*;nompC[1],UAS-AR+AR-NompC::GFP/nompC[3];nompC-GAL4	AR+AR-NOMPC:GFP	-1686.12	50.457
w*;nompC[1],UAS-AR+AR-NompC::GFP/nompC[3];nompC-GAL4	AR+AR-NOMPC:GFP	-2484.65	50.6747
w*;nompC[1],UAS-AR+AR-NompC::GFP/nompC[3];nompC-GAL4	AR+AR-NOMPC:GFP	-5047.03	48.6888
w*;nompC[1],UAS-AR+AR-NompC::GFP/nompC[3];nompC-GAL4	AR+AR-NOMPC:GFP	-6722.84	46.9093
w*;nompC[1],UAS-AR+AR-NompC::GFP/nompC[3];nompC-GAL4	AR+AR-NOMPC:GFP	-9886.1	44.3242
w*;nompC[1],UAS-AR+AR-NompC::GFP/nompC[3];nompC-GAL4	AR+AR-NOMPC:GFP	-8427.87	54.8537
w*;nompC[1],UAS-AR+AR-NompC::GFP/nompC[3];nompC-GAL4	AR+AR-NOMPC:GFP	-5720.84	53.1263
w*;nompC[1],UAS-AR+AR-NompC::GFP/nompC[3];nompC-GAL4	AR+AR-NOMPC:GFP	-4325.52	52.9053
w*;nompC[1],UAS-AR+AR-NompC::GFP/nompC[3];nompC-GAL4	AR+AR-NOMPC:GFP	-2206.21	52.3114
w*;nompC[1],UAS-AR+AR-NompC::GFP/nompC[3];nompC-GAL4	AR+AR-NOMPC:GFP	-1495.21	52.4359
w*;nompC[1],UAS-AR+AR-NompC::GFP/nompC[3];nompC-GAL4	AR+AR-NOMPC:GFP	-1221.59	52.8929
w*;nompC[1],UAS-AR+AR-NompC::GFP/nompC[3];nompC-GAL4	AR+AR-NOMPC:GFP	-978.939	51.5153
w*;nompC[1],UAS-AR+AR-NompC::GFP/nompC[3];nompC-GAL4	AR+AR-NOMPC:GFP	-733.706	51.552
w*;nompC[1],UAS-AR+AR-NompC::GFP/nompC[3];nompC-GAL4	AR+AR-NOMPC:GFP	-448.008	52.6205
w*;nompC[1],UAS-AR+AR-NompC::GFP/nompC[3];nompC-GAL4	AR+AR-NOMPC:GFP	-217.17	50.2071
w*;nompC[1],UAS-AR+AR-NompC::GFP/nompC[3];nompC-GAL4	AR+AR-NOMPC:GFP	-122.888	48.2348
w*;nompC[1],UAS-AR+AR-NompC::GFP/nompC[3];nompC-GAL4	AR+AR-NOMPC:GFP	-69.8176	48.3834
w*;nompC[1],UAS-AR+AR-NompC::GFP/nompC[3];nompC-GAL4	AR+AR-NOMPC:GFP	-41.9853	48.8811
w*;nompC[1],UAS-AR+AR-NompC::GFP/nompC[3];nompC-GAL4	AR+AR-NOMPC:GFP	-28.3673	47.4672
w*;nompC[1],UAS-AR+AR-NompC::GFP/nompC[3];nompC-GAL4	AR+AR-NOMPC:GFP	31.5348	45.7374
w*;nompC[1],UAS-AR+AR-NompC::GFP/nompC[3];nompC-GAL4	AR+AR-NOMPC:GFP	85.1512	43.8524
w*;nompC[1],UAS-AR+AR-NompC::GFP/nompC[3];nompC-GAL4	AR+AR-NOMPC:GFP	182.514	46.1592
w*;nompC[1],UAS-AR+AR-NompC::GFP/nompC[3];nompC-GAL4	AR+AR-NOMPC:GFP	442.945	50.3655
w*;nompC[1],UAS-AR+AR-NompC::GFP/nompC[3];nompC-GAL4	AR+AR-NOMPC:GFP	693.385	51.9089
w*;nompC[1],UAS-AR+AR-NompC::GFP/nompC[3];nompC-GAL4	AR+AR-NOMPC:GFP	963.107	50.5385
w*;nompC[1],UAS-AR+AR-NompC::GFP/nompC[3];nompC-GAL4	AR+AR-NOMPC:GFP	1232.13	50.8856
w*;nompC[1],UAS-AR+AR-NompC::GFP/nompC[3];nompC-GAL4	AR+AR-NOMPC:GFP	1499.22	50.877
w*;nompC[1],UAS-AR+AR-NompC::GFP/nompC[3];nompC-GAL4	AR+AR-NOMPC:GFP	2283.31	50.0567
w*;nompC[1],UAS-AR+AR-NompC::GFP/nompC[3];nompC-GAL4	AR+AR-NOMPC:GFP	4718.42	49.0264
w*;nompC[1],UAS-AR+AR-NompC::GFP/nompC[3];nompC-GAL4	AR+AR-NOMPC:GFP	6483.22	47.704
w*;nompC[1],UAS-AR+AR-NompC::GFP/nompC[3];nompC-GAL4	AR+AR-NOMPC:GFP	10200.9	45.5015
w*;nompC[1],UAS-AR+AR-NompC::GFP/nompC[3];nompC-GAL4	AR+AR-NOMPC:GFP	12195.7	49.5649
w*;nompC[1],UAS-AR+AR-NompC::GFP/nompC[3];nompC-GAL4	AR+AR-NOMPC:GFP	8097.67	49.7206
w*;nompC[1],UAS-AR+AR-NompC::GFP/nompC[3];nompC-GAL4	AR+AR-NOMPC:GFP	6120.34	49.2464
w*;nompC[1],UAS-AR+AR-NompC::GFP/nompC[3];nompC-GAL4	AR+AR-NOMPC:GFP	3009.87	50.0596
w*;nompC[1],UAS-AR+AR-NompC::GFP/nompC[3];nompC-GAL4	AR+AR-NOMPC:GFP	1968.33	50.4445
w*;nompC[1],UAS-AR+AR-NompC::GFP/nompC[3];nompC-GAL4	AR+AR-NOMPC:GFP	1628.3	50.9159
w*;nompC[1],UAS-AR+AR-NompC::GFP/nompC[3];nompC-GAL4	AR+AR-NOMPC:GFP	1269.67	49.1954
w*;nompC[1],UAS-AR+AR-NompC::GFP/nompC[3];nompC-GAL4	AR+AR-NOMPC:GFP	931.503	51.0408
w*;nompC[1],UAS-AR+AR-NompC::GFP/nompC[3];nompC-GAL4	AR+AR-NOMPC:GFP	593.334	50.6826
w*;nompC[1],UAS-AR+AR-NompC::GFP/nompC[3];nompC-GAL4	AR+AR-NOMPC:GFP	263.946	47.7158
w*;nompC[1],UAS-AR+AR-NompC::GFP/nompC[3];nompC-GAL4	AR+AR-NOMPC:GFP	135.53	46.1108
w*;nompC[1],UAS-AR+AR-NompC::GFP/nompC[3];nompC-GAL4	AR+AR-NOMPC:GFP	67.7641	47.432
w*;nompC[1],UAS-AR+AR-NompC::GFP/nompC[3];nompC-GAL4	AR+AR-NOMPC:GFP	-15.3792	53.7282
w*;nompC[1],UAS-AR+AR-NompC::GFP/nompC[3];nompC-GAL4	AR+AR-NOMPC:GFP	-32.3555	53.1747
w*;nompC[1],UAS-AR+AR-NompC::GFP/nompC[3];nompC-GAL4	AR+AR-NOMPC:GFP	-122.818	51.8629
w*;nompC[1],UAS-AR+AR-NompC::GFP/nompC[3];nompC-GAL4	AR+AR-NOMPC:GFP	-257.782	48.5634
w*;nompC[1],UAS-AR+AR-NompC::GFP/nompC[3];nompC-GAL4	AR+AR-NOMPC:GFP	-585.512	51.5601
w*;nompC[1],UAS-AR+AR-NompC::GFP/nompC[3];nompC-GAL4	AR+AR-NOMPC:GFP	-935.146	51.2751
w*;nompC[1],UAS-AR+AR-NompC::GFP/nompC[3];nompC-GAL4	AR+AR-NOMPC:GFP	-1269.99	50.9831
w*;nompC[1],UAS-AR+AR-NompC::GFP/nompC[3];nompC-GAL4	AR+AR-NOMPC:GFP	-1608.4	50.9406
w*;nompC[1],UAS-AR+AR-NompC::GFP/nompC[3];nompC-GAL4	AR+AR-NOMPC:GFP	-1980.04	50.0608
w*;nompC[1],UAS-AR+AR-NompC::GFP/nompC[3];nompC-GAL4	AR+AR-NOMPC:GFP	-3021.53	49.9624
w*;nompC[1],UAS-AR+AR-NompC::GFP/nompC[3];nompC-GAL4	AR+AR-NOMPC:GFP	-6203.68	48.2387
w*;nompC[1],UAS-AR+AR-NompC::GFP/nompC[3];nompC-GAL4	AR+AR-NOMPC:GFP	-8328.17	48.1165
w*;nompC[1],UAS-AR+AR-NompC::GFP/nompC[3];nompC-GAL4	AR+AR-NOMPC:GFP	-12192.2	49.4042
w*;nompC[1],UAS-AR+AR-NompC::GFP/nompC[3];nompC-GAL4	AR+AR-NOMPC:GFP	12642.4	48.5521
w*;nompC[1],UAS-AR+AR-NompC::GFP/nompC[3];nompC-GAL4	AR+AR-NOMPC:GFP	8464.37	48.5647
w*;nompC[1],UAS-AR+AR-NompC::GFP/nompC[3];nompC-GAL4	AR+AR-NOMPC:GFP	6311.19	49.0509
w*;nompC[1],UAS-AR+AR-NompC::GFP/nompC[3];nompC-GAL4	AR+AR-NOMPC:GFP	3034.02	51.127
w*;nompC[1],UAS-AR+AR-NompC::GFP/nompC[3];nompC-GAL4	AR+AR-NOMPC:GFP	2001.28	51.6969
w*;nompC[1],UAS-AR+AR-NompC::GFP/nompC[3];nompC-GAL4	AR+AR-NOMPC:GFP	1618.61	52.8483
w*;nompC[1],UAS-AR+AR-NompC::GFP/nompC[3];nompC-GAL4	AR+AR-NOMPC:GFP	1278.88	53.104
w*;nompC[1],UAS-AR+AR-NompC::GFP/nompC[3];nompC-GAL4	AR+AR-NOMPC:GFP	947.249	52.0017
w*;nompC[1],UAS-AR+AR-NompC::GFP/nompC[3];nompC-GAL4	AR+AR-NOMPC:GFP	622.113	49.9132
w*;nompC[1],UAS-AR+AR-NompC::GFP/nompC[3];nompC-GAL4	AR+AR-NOMPC:GFP	279.111	46.0841
w*;nompC[1],UAS-AR+AR-NompC::GFP/nompC[3];nompC-GAL4	AR+AR-NOMPC:GFP	143.096	43.2853
w*;nompC[1],UAS-AR+AR-NompC::GFP/nompC[3];nompC-GAL4	AR+AR-NOMPC:GFP	69.3325	47.9342
w*;nompC[1],UAS-AR+AR-NompC::GFP/nompC[3];nompC-GAL4	AR+AR-NOMPC:GFP	-142.699	46.584
w*;nompC[1],UAS-AR+AR-NompC::GFP/nompC[3];nompC-GAL4	AR+AR-NOMPC:GFP	-267.177	48.3266
w*;nompC[1],UAS-AR+AR-NompC::GFP/nompC[3];nompC-GAL4	AR+AR-NOMPC:GFP	-610.195	51.2917
w*;nompC[1],UAS-AR+AR-NompC::GFP/nompC[3];nompC-GAL4	AR+AR-NOMPC:GFP	-949.479	51.8064
w*;nompC[1],UAS-AR+AR-NompC::GFP/nompC[3];nompC-GAL4	AR+AR-NOMPC:GFP	-1304.94	51.7413
w*;nompC[1],UAS-AR+AR-NompC::GFP/nompC[3];nompC-GAL4	AR+AR-NOMPC:GFP	-1663.52	51.5404
w*;nompC[1],UAS-AR+AR-NompC::GFP/nompC[3];nompC-GAL4	AR+AR-NOMPC:GFP	-2030.38	51.4025
w*;nompC[1],UAS-AR+AR-NompC::GFP/nompC[3];nompC-GAL4	AR+AR-NOMPC:GFP	-3072.83	51.0516
w*;nompC[1],UAS-AR+AR-NompC::GFP/nompC[3];nompC-GAL4	AR+AR-NOMPC:GFP	-6268.06	50.0854
w*;nompC[1],UAS-AR+AR-NompC::GFP/nompC[3];nompC-GAL4	AR+AR-NOMPC:GFP	-8371.13	50.1646
w*;nompC[1],UAS-AR+AR-NompC::GFP/nompC[3];nompC-GAL4	AR+AR-NOMPC:GFP	-12226.5	51.8434
w*;nompC[3]	nompC_KO	-14788	48.922
w*;nompC[3]	nompC_KO	-13169.2	48.0667
w*;nompC[3]	nompC_KO	-12793.6	47.9649
w*;nompC[3]	nompC_KO	-12640	46.6176
w*;nompC[3]	nompC_KO	-12630.9	48.6892
w*;nompC[3]	nompC_KO	-12593.2	46.1389
w*;nompC[3]	nompC_KO	-12359.3	48.8775
w*;nompC[3]	nompC_KO	-12347.2	48.1686
w*;nompC[3]	nompC_KO	-12214.4	46.7899
w*;nompC[3]	nompC_KO	-12093.4	44.9314
w*;nompC[3]	nompC_KO	-12067.8	47.5092
w*;nompC[3]	nompC_KO	-11857.8	47.188
w*;nompC[3]	nompC_KO	-11482.6	48.4261
w*;nompC[3]	nompC_KO	-11301.9	48.1808
w*;nompC[3]	nompC_KO	-11192.6	48.1242
w*;nompC[3]	nompC_KO	-10960.1	47.673
w*;nompC[3]	nompC_KO	-10758.9	48.4077
w*;nompC[3]	nompC_KO	-10709	47.0731
w*;nompC[3]	nompC_KO	-10285.6	49.1461
w*;nompC[3]	nompC_KO	-10250.7	49.2538
w*;nompC[3]	nompC_KO	-9961.08	46.3669
w*;nompC[3]	nompC_KO	-9418.95	49.0397
w*;nompC[3]	nompC_KO	-9306.7	47.1559
w*;nompC[3]	nompC_KO	-9114.07	47.2669
w*;nompC[3]	nompC_KO	-9109.12	48.2637
w*;nompC[3]	nompC_KO	-9066.03	45.723
w*;nompC[3]	nompC_KO	-9012.54	47.9373
w*;nompC[3]	nompC_KO	-8957.1	45.9875
w*;nompC[3]	nompC_KO	-8823.14	46.0376
w*;nompC[3]	nompC_KO	-8680.29	47.0242
w*;nompC[3]	nompC_KO	-8638.06	46.6145
w*;nompC[3]	nompC_KO	-8414.35	46.2714
w*;nompC[3]	nompC_KO	-8092.66	47.3845
w*;nompC[3]	nompC_KO	-8072.5	47.5692
w*;nompC[3]	nompC_KO	-8056.1	47.73
w*;nompC[3]	nompC_KO	-8038.82	46.0187
w*;nompC[3]	nompC_KO	-7628.34	47.5373
w*;nompC[3]	nompC_KO	-7542.06	46.1388
w*;nompC[3]	nompC_KO	-7449.21	47.448
w*;nompC[3]	nompC_KO	-7322.34	48.1399
w*;nompC[3]	nompC_KO	-7101.58	46.836
w*;nompC[3]	nompC_KO	-7036.35	45.9118
w*;nompC[3]	nompC_KO	-6940.37	47.9833
w*;nompC[3]	nompC_KO	-6729.72	48.3033
w*;nompC[3]	nompC_KO	-6004.92	46.7285
w*;nompC[3]	nompC_KO	-6001.88	46.9347
w*;nompC[3]	nompC_KO	-5911.18	45.4378
w*;nompC[3]	nompC_KO	-5889.78	47.1358
w*;nompC[3]	nompC_KO	-5888.22	47.1566
w*;nompC[3]	nompC_KO	-5740.78	46.82
w*;nompC[3]	nompC_KO	-5646.07	45.7947
w*;nompC[3]	nompC_KO	-5622.35	46.0167
w*;nompC[3]	nompC_KO	-5590.42	46.2912
w*;nompC[3]	nompC_KO	-5443.95	45.7822
w*;nompC[3]	nompC_KO	-5338.55	46.7427
w*;nompC[3]	nompC_KO	-5271.41	47.6613
w*;nompC[3]	nompC_KO	-5242.95	47.2298
w*;nompC[3]	nompC_KO	-5173.05	47.1394
w*;nompC[3]	nompC_KO	-5023.51	46.4873
w*;nompC[3]	nompC_KO	-4926.49	46.9703
w*;nompC[3]	nompC_KO	-4913.32	45.6842
w*;nompC[3]	nompC_KO	-4858.44	46.8879
w*;nompC[3]	nompC_KO	-4748.48	47.5009
w*;nompC[3]	nompC_KO	-4532.39	45.8455
w*;nompC[3]	nompC_KO	-4373.17	47.5611
w*;nompC[3]	nompC_KO	-3951.84	45.8984
w*;nompC[3]	nompC_KO	-3859.74	47.144
w*;nompC[3]	nompC_KO	-3393.27	45.9867
w*;nompC[3]	nompC_KO	-3375.88	44.6598
w*;nompC[3]	nompC_KO	-3349.56	46.1828
w*;nompC[3]	nompC_KO	-3312.23	46.1502
w*;nompC[3]	nompC_KO	-3272.76	46.7439
w*;nompC[3]	nompC_KO	-3228.13	46.0839
w*;nompC[3]	nompC_KO	-3156.81	44.8243
w*;nompC[3]	nompC_KO	-3096.86	46.0923
w*;nompC[3]	nompC_KO	-3085.17	45.5212
w*;nompC[3]	nompC_KO	-3084.78	45.649
w*;nompC[3]	nompC_KO	-3044.59	45.3182
w*;nompC[3]	nompC_KO	-2942.63	46.5047
w*;nompC[3]	nompC_KO	-2901.75	45.0134
w*;nompC[3]	nompC_KO	-2885.73	46.3839
w*;nompC[3]	nompC_KO	-2780	45.3434
w*;nompC[3]	nompC_KO	-2741.93	46.4233
w*;nompC[3]	nompC_KO	-2736.53	46.2623
w*;nompC[3]	nompC_KO	-2707.37	46.8746
w*;nompC[3]	nompC_KO	-2678.81	46.4132
w*;nompC[3]	nompC_KO	-2518.03	45.8667
w*;nompC[3]	nompC_KO	-2480.16	45.7971
w*;nompC[3]	nompC_KO	-2473.67	46.6613
w*;nompC[3]	nompC_KO	-2467.69	44.5477
w*;nompC[3]	nompC_KO	-2450.27	45.796
w*;nompC[3]	nompC_KO	-2401.35	45.7581
w*;nompC[3]	nompC_KO	-2397.15	45.8797
w*;nompC[3]	nompC_KO	-2390.77	46.3106
w*;nompC[3]	nompC_KO	-2362.27	44.4498
w*;nompC[3]	nompC_KO	-2300.16	44.3123
w*;nompC[3]	nompC_KO	-2288.6	45.081
w*;nompC[3]	nompC_KO	-2251.72	46.0459
w*;nompC[3]	nompC_KO	-2230.49	46.9926
w*;nompC[3]	nompC_KO	-2222.75	45.3263
w*;nompC[3]	nompC_KO	-2217.83	45.4136
w*;nompC[3]	nompC_KO	-2160.55	45.9638
w*;nompC[3]	nompC_KO	-2117.33	46.1296
w*;nompC[3]	nompC_KO	-2025.7	45.4271
w*;nompC[3]	nompC_KO	-2012.37	44.1966
w*;nompC[3]	nompC_KO	-2002.5	46.2903
w*;nompC[3]	nompC_KO	-2001.62	46.1716
w*;nompC[3]	nompC_KO	-1984.2	46.3151
w*;nompC[3]	nompC_KO	-1982.65	45.606
w*;nompC[3]	nompC_KO	-1967.5	46.0982
w*;nompC[3]	nompC_KO	-1954.37	46.3622
w*;nompC[3]	nompC_KO	-1946.93	45.6605
w*;nompC[3]	nompC_KO	-1939.07	45.8355
w*;nompC[3]	nompC_KO	-1933.82	46.4031
w*;nompC[3]	nompC_KO	-1901.12	43.6108
w*;nompC[3]	nompC_KO	-1851.51	45.1118
w*;nompC[3]	nompC_KO	-1848.83	45.5834
w*;nompC[3]	nompC_KO	-1829.35	46.0387
w*;nompC[3]	nompC_KO	-1820.65	46.2917
w*;nompC[3]	nompC_KO	-1817.84	44.9524
w*;nompC[3]	nompC_KO	-1791.83	45.0055
w*;nompC[3]	nompC_KO	-1784.55	44.8873
w*;nompC[3]	nompC_KO	-1753.18	45.8626
w*;nompC[3]	nompC_KO	-1735.39	46.0075
w*;nompC[3]	nompC_KO	-1631.04	44.445
w*;nompC[3]	nompC_KO	-1630.59	46.0594
w*;nompC[3]	nompC_KO	-1622.89	46.2442
w*;nompC[3]	nompC_KO	-1605.95	46.7779
w*;nompC[3]	nompC_KO	-1592.42	46.5603
w*;nompC[3]	nompC_KO	-1588.56	46.1151
w*;nompC[3]	nompC_KO	-1555.59	45.2927
w*;nompC[3]	nompC_KO	-1541.86	43.9872
w*;nompC[3]	nompC_KO	-1516.45	45.4522
w*;nompC[3]	nompC_KO	-1502.04	45.4262
w*;nompC[3]	nompC_KO	-1486.51	44.9624
w*;nompC[3]	nompC_KO	-1483.24	46.107
w*;nompC[3]	nompC_KO	-1480.98	45.9611
w*;nompC[3]	nompC_KO	-1472.31	45.4213
w*;nompC[3]	nompC_KO	-1432.85	44.1903
w*;nompC[3]	nompC_KO	-1414.16	45.2224
w*;nompC[3]	nompC_KO	-1406.82	43.8978
w*;nompC[3]	nompC_KO	-1394.71	46.3479
w*;nompC[3]	nompC_KO	-1363.98	44.7289
w*;nompC[3]	nompC_KO	-1350.15	45.8739
w*;nompC[3]	nompC_KO	-1341.97	45.73
w*;nompC[3]	nompC_KO	-1264.78	44.4047
w*;nompC[3]	nompC_KO	-1250.58	45.9543
w*;nompC[3]	nompC_KO	-1243.73	46.1722
w*;nompC[3]	nompC_KO	-1224.95	45.7075
w*;nompC[3]	nompC_KO	-1224.27	46.4241
w*;nompC[3]	nompC_KO	-1212.75	46.5689
w*;nompC[3]	nompC_KO	-1208.62	45.15
w*;nompC[3]	nompC_KO	-1148.87	45.4969
w*;nompC[3]	nompC_KO	-1143.86	45.7196
w*;nompC[3]	nompC_KO	-1077.18	44.0548
w*;nompC[3]	nompC_KO	-1048.3	45.0987
w*;nompC[3]	nompC_KO	-1047.73	44.1914
w*;nompC[3]	nompC_KO	-1034.83	44.8714
w*;nompC[3]	nompC_KO	-1031.25	44.7595
w*;nompC[3]	nompC_KO	-1006.94	44.6913
w*;nompC[3]	nompC_KO	-979.127	45.5439
w*;nompC[3]	nompC_KO	-974.606	45.0329
w*;nompC[3]	nompC_KO	-966.219	43.9312
w*;nompC[3]	nompC_KO	-952.959	45.6605
w*;nompC[3]	nompC_KO	-939.637	44.3488
w*;nompC[3]	nompC_KO	-932.209	46.0285
w*;nompC[3]	nompC_KO	-925.645	45.2796
w*;nompC[3]	nompC_KO	-920.377	45.9296
w*;nompC[3]	nompC_KO	-868.434	45.6804
w*;nompC[3]	nompC_KO	-858.658	46.1405
w*;nompC[3]	nompC_KO	-850.467	45.9407
w*;nompC[3]	nompC_KO	-847.09	45.725
w*;nompC[3]	nompC_KO	-844.317	44.8879
w*;nompC[3]	nompC_KO	-799.132	45.6487
w*;nompC[3]	nompC_KO	-795.733	45.7103
w*;nompC[3]	nompC_KO	-664.668	44.5711
w*;nompC[3]	nompC_KO	-643.384	45.3508
w*;nompC[3]	nompC_KO	-592.617	43.3641
w*;nompC[3]	nompC_KO	-579.865	43.9061
w*;nompC[3]	nompC_KO	-575.853	45.1423
w*;nompC[3]	nompC_KO	-565.939	45.2284
w*;nompC[3]	nompC_KO	-565.682	44.4149
w*;nompC[3]	nompC_KO	-545.873	45.3734
w*;nompC[3]	nompC_KO	-544.932	45.5194
w*;nompC[3]	nompC_KO	-537.679	44.6337
w*;nompC[3]	nompC_KO	-535.82	44.4791
w*;nompC[3]	nompC_KO	-516.892	44.1908
w*;nompC[3]	nompC_KO	-513.502	46.0493
w*;nompC[3]	nompC_KO	-512.107	44.9011
w*;nompC[3]	nompC_KO	-508.128	46.6801
w*;nompC[3]	nompC_KO	-481.275	45.495
w*;nompC[3]	nompC_KO	-474.743	45.4008
w*;nompC[3]	nompC_KO	-472.823	45.2254
w*;nompC[3]	nompC_KO	-471.908	46.4707
w*;nompC[3]	nompC_KO	-449.806	45.7128
w*;nompC[3]	nompC_KO	-449.606	44.2697
w*;nompC[3]	nompC_KO	-431.623	46.7796
w*;nompC[3]	nompC_KO	-358.009	44.9141
w*;nompC[3]	nompC_KO	-280.233	46.0674
w*;nompC[3]	nompC_KO	-264.856	44.4602
w*;nompC[3]	nompC_KO	-256.576	43.9734
w*;nompC[3]	nompC_KO	-253.33	45.7835
w*;nompC[3]	nompC_KO	-243.758	45.2998
w*;nompC[3]	nompC_KO	-241.715	46.092
w*;nompC[3]	nompC_KO	-240.731	46.6505
w*;nompC[3]	nompC_KO	-237.973	44.6455
w*;nompC[3]	nompC_KO	-233.372	47.3531
w*;nompC[3]	nompC_KO	-230.558	44.3526
w*;nompC[3]	nompC_KO	-229.798	46.0284
w*;nompC[3]	nompC_KO	-226.449	46.1422
w*;nompC[3]	nompC_KO	-223.153	44.8698
w*;nompC[3]	nompC_KO	-216.016	44.7597
w*;nompC[3]	nompC_KO	-213.398	48.7896
w*;nompC[3]	nompC_KO	-212.089	46.6424
w*;nompC[3]	nompC_KO	-210.404	46.321
w*;nompC[3]	nompC_KO	-207.141	45.0067
w*;nompC[3]	nompC_KO	-198.796	45.3504
w*;nompC[3]	nompC_KO	-198.703	44.3576
w*;nompC[3]	nompC_KO	-188.63	47.2602
w*;nompC[3]	nompC_KO	-154.923	44.1383
w*;nompC[3]	nompC_KO	-128.081	44.1368
w*;nompC[3]	nompC_KO	-124.544	46.2242
w*;nompC[3]	nompC_KO	-123.838	46.788
w*;nompC[3]	nompC_KO	-118.512	47.3205
w*;nompC[3]	nompC_KO	-117.962	47.1412
w*;nompC[3]	nompC_KO	-117.787	47.4781
w*;nompC[3]	nompC_KO	-117.137	46.2157
w*;nompC[3]	nompC_KO	-112.735	46.6326
w*;nompC[3]	nompC_KO	-111.51	49.3642
w*;nompC[3]	nompC_KO	-110.907	44.6597
w*;nompC[3]	nompC_KO	-109.388	46.9553
w*;nompC[3]	nompC_KO	-109.049	44.9539
w*;nompC[3]	nompC_KO	-108.777	45.6604
w*;nompC[3]	nompC_KO	-104.925	45.4737
w*;nompC[3]	nompC_KO	-104.172	46.3295
w*;nompC[3]	nompC_KO	-102.496	44.163
w*;nompC[3]	nompC_KO	-97.7273	46.9067
w*;nompC[3]	nompC_KO	-95.0599	47.2127
w*;nompC[3]	nompC_KO	-70.9104	45.6418
w*;nompC[3]	nompC_KO	-70.8226	47.6613
w*;nompC[3]	nompC_KO	-69.687	46.9828
w*;nompC[3]	nompC_KO	-68.2475	46.7342
w*;nompC[3]	nompC_KO	-63.8579	48.0229
w*;nompC[3]	nompC_KO	-61.7725	44.4539
w*;nompC[3]	nompC_KO	-57.8294	45.4692
w*;nompC[3]	nompC_KO	-57.585	46.9679
w*;nompC[3]	nompC_KO	-56.918	46.4345
w*;nompC[3]	nompC_KO	-54.9908	43.234
w*;nompC[3]	nompC_KO	-52.9113	47.0678
w*;nompC[3]	nompC_KO	-37.8557	47.7974
w*;nompC[3]	nompC_KO	-37.0189	45.8776
w*;nompC[3]	nompC_KO	-35.8466	48.0199
w*;nompC[3]	nompC_KO	-34.5108	43.5144
w*;nompC[3]	nompC_KO	-31.1908	45.4404
w*;nompC[3]	nompC_KO	-30.9675	45.1924
w*;nompC[3]	nompC_KO	-29.5377	43.2552
w*;nompC[3]	nompC_KO	-28.3647	44.0701
w*;nompC[3]	nompC_KO	-20.6258	45.0219
w*;nompC[3]	nompC_KO	-2.80587	44.1526
w*;nompC[3]	nompC_KO	19.1714	45.6518
w*;nompC[3]	nompC_KO	23.8903	44.7586
w*;nompC[3]	nompC_KO	24.3911	42.2453
w*;nompC[3]	nompC_KO	29.23	47.0918
w*;nompC[3]	nompC_KO	41.4181	46.5309
w*;nompC[3]	nompC_KO	44.2075	47.622
w*;nompC[3]	nompC_KO	49.9331	46.0099
w*;nompC[3]	nompC_KO	52.0785	43.0637
w*;nompC[3]	nompC_KO	53.1105	44.9229
w*;nompC[3]	nompC_KO	54.7274	44.0042
w*;nompC[3]	nompC_KO	56.3276	45.7047
w*;nompC[3]	nompC_KO	58.7112	44.6121
w*;nompC[3]	nompC_KO	59.4241	43.6071
w*;nompC[3]	nompC_KO	72.8573	43.6384
w*;nompC[3]	nompC_KO	79.8211	44.9448
w*;nompC[3]	nompC_KO	87.2891	47.7796
w*;nompC[3]	nompC_KO	91.9877	45.5821
w*;nompC[3]	nompC_KO	93.8566	46.1349
w*;nompC[3]	nompC_KO	95.3165	45.2898
w*;nompC[3]	nompC_KO	97.197	46.9928
w*;nompC[3]	nompC_KO	100.108	45.34
w*;nompC[3]	nompC_KO	100.582	43.2682
w*;nompC[3]	nompC_KO	105.621	45.1126
w*;nompC[3]	nompC_KO	109.504	43.8486
w*;nompC[3]	nompC_KO	113.377	44.6956
w*;nompC[3]	nompC_KO	113.63	45.9665
w*;nompC[3]	nompC_KO	119.197	45.6911
w*;nompC[3]	nompC_KO	124.327	44.9237
w*;nompC[3]	nompC_KO	126.939	44.6698
w*;nompC[3]	nompC_KO	136.788	43.8009
w*;nompC[3]	nompC_KO	137.924	43.252
w*;nompC[3]	nompC_KO	150.796	43.6673
w*;nompC[3]	nompC_KO	188.368	44.9686
w*;nompC[3]	nompC_KO	190.6	45.5724
w*;nompC[3]	nompC_KO	194.167	45.4519
w*;nompC[3]	nompC_KO	199.609	45.4353
w*;nompC[3]	nompC_KO	201.574	45.6709
w*;nompC[3]	nompC_KO	202.941	42.6898
w*;nompC[3]	nompC_KO	206.069	45.1273
w*;nompC[3]	nompC_KO	218.827	44.591
w*;nompC[3]	nompC_KO	218.926	45.7533
w*;nompC[3]	nompC_KO	231.131	45.4035
w*;nompC[3]	nompC_KO	232.826	46.3144
w*;nompC[3]	nompC_KO	237.538	44.1959
w*;nompC[3]	nompC_KO	248.781	45.1769
w*;nompC[3]	nompC_KO	255.328	44.8252
w*;nompC[3]	nompC_KO	255.67	44.1366
w*;nompC[3]	nompC_KO	261.138	44.2403
w*;nompC[3]	nompC_KO	284.262	47.6688
w*;nompC[3]	nompC_KO	345.587	44.5967
w*;nompC[3]	nompC_KO	431.147	45.2995
w*;nompC[3]	nompC_KO	432.936	45.0621
w*;nompC[3]	nompC_KO	452.685	46.5121
w*;nompC[3]	nompC_KO	457.374	44.6294
w*;nompC[3]	nompC_KO	457.729	45.1398
w*;nompC[3]	nompC_KO	471.262	45.2036
w*;nompC[3]	nompC_KO	474.082	45.2922
w*;nompC[3]	nompC_KO	499.331	44.6577
w*;nompC[3]	nompC_KO	510.555	45.8605
w*;nompC[3]	nompC_KO	520.645	44.2738
w*;nompC[3]	nompC_KO	529.709	43.9961
w*;nompC[3]	nompC_KO	533.323	45.3354
w*;nompC[3]	nompC_KO	538.404	45.2806
w*;nompC[3]	nompC_KO	541.398	45.5752
w*;nompC[3]	nompC_KO	555.213	44.2529
w*;nompC[3]	nompC_KO	566.232	45.374
w*;nompC[3]	nompC_KO	572.723	44.2478
w*;nompC[3]	nompC_KO	578.394	45.1387
w*;nompC[3]	nompC_KO	589.96	43.8557
w*;nompC[3]	nompC_KO	628.126	45.6151
w*;nompC[3]	nompC_KO	661.338	45.9714
w*;nompC[3]	nompC_KO	784.401	45.8172
w*;nompC[3]	nompC_KO	785.188	45.2557
w*;nompC[3]	nompC_KO	786.946	47.2848
w*;nompC[3]	nompC_KO	839.204	45.3772
w*;nompC[3]	nompC_KO	851.792	45.2343
w*;nompC[3]	nompC_KO	855.665	45.7599
w*;nompC[3]	nompC_KO	858.147	45.6303
w*;nompC[3]	nompC_KO	916.414	44.2257
w*;nompC[3]	nompC_KO	921.032	44.7459
w*;nompC[3]	nompC_KO	928.339	45.7901
w*;nompC[3]	nompC_KO	929.402	45.4409
w*;nompC[3]	nompC_KO	931.433	45.5051
w*;nompC[3]	nompC_KO	954.889	44.2871
w*;nompC[3]	nompC_KO	970.358	45.44
w*;nompC[3]	nompC_KO	1000.5	45.2626
w*;nompC[3]	nompC_KO	1000.51	44.9401
w*;nompC[3]	nompC_KO	1012.95	45.184
w*;nompC[3]	nompC_KO	1031.64	44.4494
w*;nompC[3]	nompC_KO	1037.32	45.3172
w*;nompC[3]	nompC_KO	1056.37	45.4849
w*;nompC[3]	nompC_KO	1083.34	43.8889
w*;nompC[3]	nompC_KO	1128.64	45.5077
w*;nompC[3]	nompC_KO	1129.28	46.0152
w*;nompC[3]	nompC_KO	1137.35	47.0134
w*;nompC[3]	nompC_KO	1199.18	45.3392
w*;nompC[3]	nompC_KO	1212.48	45.4969
w*;nompC[3]	nompC_KO	1215.42	45.5047
w*;nompC[3]	nompC_KO	1222.7	45.1697
w*;nompC[3]	nompC_KO	1241.86	45.7623
w*;nompC[3]	nompC_KO	1243.59	45.8657
w*;nompC[3]	nompC_KO	1322.11	45.2278
w*;nompC[3]	nompC_KO	1329.95	46.2265
w*;nompC[3]	nompC_KO	1331.14	45.1861
w*;nompC[3]	nompC_KO	1357.31	45.1877
w*;nompC[3]	nompC_KO	1378.76	44.9906
w*;nompC[3]	nompC_KO	1395.53	46.093
w*;nompC[3]	nompC_KO	1425.5	45.6644
w*;nompC[3]	nompC_KO	1450.97	45.891
w*;nompC[3]	nompC_KO	1458.17	45.9638
w*;nompC[3]	nompC_KO	1464.42	45.6386
w*;nompC[3]	nompC_KO	1477.68	45.7174
w*;nompC[3]	nompC_KO	1481.51	45.9655
w*;nompC[3]	nompC_KO	1496.01	45.2959
w*;nompC[3]	nompC_KO	1499.31	46.7808
w*;nompC[3]	nompC_KO	1501.21	45.3522
w*;nompC[3]	nompC_KO	1540.16	45.7336
w*;nompC[3]	nompC_KO	1545.94	46.4132
w*;nompC[3]	nompC_KO	1559.49	44.6667
w*;nompC[3]	nompC_KO	1573.79	45.9751
w*;nompC[3]	nompC_KO	1622.13	45.7571
w*;nompC[3]	nompC_KO	1632.66	45.66
w*;nompC[3]	nompC_KO	1725.05	46.5581
w*;nompC[3]	nompC_KO	1734.45	45.8747
w*;nompC[3]	nompC_KO	1745.1	46.1704
w*;nompC[3]	nompC_KO	1770.39	45.3192
w*;nompC[3]	nompC_KO	1790.89	44.9716
w*;nompC[3]	nompC_KO	1793.23	45.398
w*;nompC[3]	nompC_KO	1807.24	45.6786
w*;nompC[3]	nompC_KO	1815.22	46.342
w*;nompC[3]	nompC_KO	1831.97	45.5531
w*;nompC[3]	nompC_KO	1855.05	46.6286
w*;nompC[3]	nompC_KO	1888.22	46.5397
w*;nompC[3]	nompC_KO	1894.59	45.2647
w*;nompC[3]	nompC_KO	1902.64	46.8399
w*;nompC[3]	nompC_KO	1902.93	46.5265
w*;nompC[3]	nompC_KO	1947.57	45.8917
w*;nompC[3]	nompC_KO	1960.58	45.6052
w*;nompC[3]	nompC_KO	1993.29	45.2001
w*;nompC[3]	nompC_KO	1995.5	46.0359
w*;nompC[3]	nompC_KO	2013.54	45.8808
w*;nompC[3]	nompC_KO	2018.4	45.4911
w*;nompC[3]	nompC_KO	2019.62	45.4584
w*;nompC[3]	nompC_KO	2087.57	45.9935
w*;nompC[3]	nompC_KO	2120.09	46.4971
w*;nompC[3]	nompC_KO	2136.26	46.7396
w*;nompC[3]	nompC_KO	2141.22	46.221
w*;nompC[3]	nompC_KO	2214.89	45.6808
w*;nompC[3]	nompC_KO	2219.65	45.0914
w*;nompC[3]	nompC_KO	2304.41	45.5433
w*;nompC[3]	nompC_KO	2332.41	45.5872
w*;nompC[3]	nompC_KO	2361.6	46.1614
w*;nompC[3]	nompC_KO	2367.49	46.8164
w*;nompC[3]	nompC_KO	2434.26	45.7279
w*;nompC[3]	nompC_KO	2487.76	46.1864
w*;nompC[3]	nompC_KO	2490.64	45.9488
w*;nompC[3]	nompC_KO	2491.43	45.2898
w*;nompC[3]	nompC_KO	2500.43	45.5664
w*;nompC[3]	nompC_KO	2505.8	46.6984
w*;nompC[3]	nompC_KO	2522.63	45.7073
w*;nompC[3]	nompC_KO	2577.53	47.3683
w*;nompC[3]	nompC_KO	2678.31	45.8207
w*;nompC[3]	nompC_KO	2735.95	46.324
w*;nompC[3]	nompC_KO	2789.67	45.273
w*;nompC[3]	nompC_KO	2862.4	45.416
w*;nompC[3]	nompC_KO	2918.77	47.1111
w*;nompC[3]	nompC_KO	2934.82	46.3826
w*;nompC[3]	nompC_KO	2949.19	46.8438
w*;nompC[3]	nompC_KO	2981.91	46.5057
w*;nompC[3]	nompC_KO	3053.47	45.3902
w*;nompC[3]	nompC_KO	3141.38	46.7831
w*;nompC[3]	nompC_KO	3216.11	46.5628
w*;nompC[3]	nompC_KO	3258.79	46.6987
w*;nompC[3]	nompC_KO	3340.22	46.2108
w*;nompC[3]	nompC_KO	3411.78	46.8481
w*;nompC[3]	nompC_KO	3412.69	45.639
w*;nompC[3]	nompC_KO	3431.84	46.0458
w*;nompC[3]	nompC_KO	3732.74	46.0526
w*;nompC[3]	nompC_KO	3896.3	45.6614
w*;nompC[3]	nompC_KO	4427.18	46.7369
w*;nompC[3]	nompC_KO	4486.76	46.7069
w*;nompC[3]	nompC_KO	4530.06	47.9333
w*;nompC[3]	nompC_KO	4539.15	45.9829
w*;nompC[3]	nompC_KO	4812.15	46.1439
w*;nompC[3]	nompC_KO	4930.99	46.7287
w*;nompC[3]	nompC_KO	5065.29	45.1103
w*;nompC[3]	nompC_KO	5170.63	49.148
w*;nompC[3]	nompC_KO	5263.17	47.6733
w*;nompC[3]	nompC_KO	5291.5	47.0881
w*;nompC[3]	nompC_KO	5304.59	46.9618
w*;nompC[3]	nompC_KO	5623.63	45.735
w*;nompC[3]	nompC_KO	5661.04	47.7946
w*;nompC[3]	nompC_KO	5706.94	47.8721
w*;nompC[3]	nompC_KO	5871.5	46.7323
w*;nompC[3]	nompC_KO	5994.53	46.9662
w*;nompC[3]	nompC_KO	6111.65	48.7445
w*;nompC[3]	nompC_KO	6126.64	46.9758
w*;nompC[3]	nompC_KO	6147.73	47.6773
w*;nompC[3]	nompC_KO	6169.64	46.2253
w*;nompC[3]	nompC_KO	6894.18	47.4539
w*;nompC[3]	nompC_KO	6934.41	46.9036
w*;nompC[3]	nompC_KO	6945.45	48.4283
w*;nompC[3]	nompC_KO	7009.61	45.9818
w*;nompC[3]	nompC_KO	7026	46.1971
w*;nompC[3]	nompC_KO	7554.99	45.7668
w*;nompC[3]	nompC_KO	7653.55	46.9159
w*;nompC[3]	nompC_KO	7910.67	50.4178
w*;nompC[3]	nompC_KO	7917.05	44.9707
w*;nompC[3]	nompC_KO	8057.07	47.7633
w*;nompC[3]	nompC_KO	8068.54	48.6769
w*;nompC[3]	nompC_KO	8237.63	47.4573
w*;nompC[3]	nompC_KO	8785.79	48.8077
w*;nompC[3]	nompC_KO	8878.19	45.8974
w*;nompC[3]	nompC_KO	9000.68	49.1103
w*;nompC[3]	nompC_KO	9107.24	47.0413
w*;nompC[3]	nompC_KO	9288.47	47.4579
w*;nompC[3]	nompC_KO	9338.5	50.8882
w*;nompC[3]	nompC_KO	9385.84	50.6664
w*;nompC[3]	nompC_KO	9394.21	48.0984
w*;nompC[3]	nompC_KO	9502.19	48.7839
w*;nompC[3]	nompC_KO	9603.36	46.7672
w*;nompC[3]	nompC_KO	9660.93	49.1013
w*;nompC[3]	nompC_KO	9671.75	47.9834
w*;nompC[3]	nompC_KO	9970.3	46.8032
w*;nompC[3]	nompC_KO	10797.1	45.6629
w*;nompC[3]	nompC_KO	10823.8	51.9587
w*;nompC[3]	nompC_KO	10843.4	47.4099
w*;nompC[3]	nompC_KO	10873.2	46.407
w*;nompC[3]	nompC_KO	11039.4	49.1644
w*;nompC[3]	nompC_KO	11083.5	52.8712
w*;nompC[3]	nompC_KO	11257.6	45.1384
w*;nompC[3]	nompC_KO	11632.4	48.9245
w*;nompC[3]	nompC_KO	12380.6	51.4242
w*;nompC[3]	nompC_KO	12382.2	47.7348
w*;nompC[3]	nompC_KO	12444	50.7585
w*;nompC[3]	nompC_KO	12744.4	51.4873
w*;nompC[3]	nompC_KO	12987.4	47.5129
w*;nompC[3]	nompC_KO	13022.2	54.1533
w*;nompC[3]	nompC_KO	13092.4	48.314
w*;nompC[3]	nompC_KO	13420.9	48.5018
w*;nompC[3]	nompC_KO	15221.4	47.8589

## Sheet: Fig_3_e
genotype_long	genotype	z_fN		Group	N	Missing	Mean	Std. Deviation	SE of Mean	Anova	DF	Sum of Squares	Mean Square	F Value	Prob>F	Comparison	Mean Difference	SEM	t Value	Prob	Sig	LCL	UCL
w*;nompC[3],UAS-NompC::GFP/nompC[3];nompC-GAL4	NOMPC:GFP	21.87		NOMPC:GFP	5	0	22.926	1.68601	0.75401	Model	2	524.611	262.305	138.907	5.03932e-09	AR+AR-NOMPC:GFP vs. NOMPC:GFP	1.418	0.8691	1.63157	0.38616	0	-0.99765	3.83365
w*;nompC[3],UAS-NompC::GFP/nompC[3];nompC-GAL4	NOMPC:GFP	25		AR+AR-NOMPC:GFP	5	0	24.344	0.49913	0.22322	Error	12	22.6602	1.88835			LH+LH-NOMPC:GFP vs. NOMPC:GFP	-11.776	0.8691	-13.5496	3.7082e-08	1	-14.1916	-9.36035
w*;nompC[3],UAS-NompC::GFP/nompC[3];nompC-GAL4	NOMPC:GFP	24.52		LH+LH-NOMPC:GFP	5	0	11.15	1.60415	0.7174	Total	14	547.271				LH+LH-NOMPC:GFP vs. AR+AR-NOMPC:GFP	-13.194	0.8691	-15.1812	1.01629e-08	1	-15.6097	-10.7783
w*;nompC[3],UAS-NompC::GFP/nompC[3];nompC-GAL4	NOMPC:GFP	21.65
w*;nompC[3],UAS-NompC::GFP/nompC[3];nompC-GAL4	NOMPC:GFP	21.59		Mann_Whitney_U	Comparison	p-value	p-value (Bonferroni corrected)	Reject Null Hypothesis
w*;nompC[1],UAS-AR+AR-NompC::GFP/nompC[3];nompC-GAL4	AR+AR-NOMPC:GFP	24		alpha=0.05	NOMPC:GFP vs AR+AR-NOMPC:GFP	0.420635	1	FALSE
w*;nompC[1],UAS-AR+AR-NompC::GFP/nompC[3];nompC-GAL4	AR+AR-NOMPC:GFP	24.94			NOMPC:GFP vs LH+LH-NOMPC:GFP	0.0119252	0.0357757	TRUE
w*;nompC[1],UAS-AR+AR-NompC::GFP/nompC[3];nompC-GAL4	AR+AR-NOMPC:GFP	24.81			AR+AR-NOMPC:GFP vs LH+LH-NOMPC:GFP	0.0119252	0.0357757	TRUE
w*;nompC[1],UAS-AR+AR-NompC::GFP/nompC[3];nompC-GAL4	AR+AR-NOMPC:GFP	23.83
w*;nompC[1],UAS-AR+AR-NompC::GFP/nompC[3];nompC-GAL4	AR+AR-NOMPC:GFP	24.14
w*;nompC[3],UAS-LH+LH-NompC::GFP/nompC[3];nompC-GAL4	LH+LH-NOMPC:GFP	8.71
w*;nompC[3],UAS-LH+LH-NompC::GFP/nompC[3];nompC-GAL4	LH+LH-NOMPC:GFP	11
w*;nompC[3],UAS-LH+LH-NompC::GFP/nompC[3];nompC-GAL4	LH+LH-NOMPC:GFP	13.04
w*;nompC[3],UAS-LH+LH-NompC::GFP/nompC[3];nompC-GAL4	LH+LH-NOMPC:GFP	11
w*;nompC[3],UAS-LH+LH-NompC::GFP/nompC[3];nompC-GAL4	LH+LH-NOMPC:GFP	12

## Sheet: Fig_3_f
genotype_long	genotype	KGSs_microN*m-1		Group	N	Missing	Mean	Std. Deviation	SE of Mean	Anova	DF	Sum of Squares	Mean Square	F Value	Prob>F	Comparison	Mean Difference	SEM	t Value	Prob	Sig	LCL	UCL
w*;nompC[3],UAS-NompC::GFP/nompC[3];nompC-GAL4	NOMPC:GFP	14.1379		NOMPC:GFP	5	0	10.9134	2.352	1.05185	Model	2	110.926	55.4632	16.477	0.00036181	AR+AR-NOMPC:GFP vs. NOMPC:GFP	-2.35008	1.16036	-2.0253	0.19701	0	-5.57527	0.87512
w*;nompC[3],UAS-NompC::GFP/nompC[3];nompC-GAL4	NOMPC:GFP	12.2587		AR+AR-NOMPC:GFP	5	0	8.56331	1.57545	0.70456	Error	12	40.3932	3.3661			LH+LH-NOMPC:GFP vs. NOMPC:GFP	-6.57279	1.16036	-5.66443	0.000314572	1	-9.79799	-3.3476
w*;nompC[3],UAS-NompC::GFP/nompC[3];nompC-GAL4	NOMPC:GFP	10.3392		LH+LH-NOMPC:GFP	5	0	4.34059	1.44373	0.64566	Total	14	151.32				LH+LH-NOMPC:GFP vs. AR+AR-NOMPC:GFP	-4.22272	1.16036	-3.63914	0.01018	1	-7.44791	-0.99752
w*;nompC[3],UAS-NompC::GFP/nompC[3];nompC-GAL4	NOMPC:GFP	8.01907
w*;nompC[3],UAS-NompC::GFP/nompC[3];nompC-GAL4	NOMPC:GFP	9.81197		Mann_Whitney_U	Comparison	p-value	p-value (Bonferroni corrected)	Reject Null Hypothesis
w*;nompC[1],UAS-AR+AR-NompC::GFP/nompC[3];nompC-GAL4	AR+AR-NOMPC:GFP	6.19444		alpha=0.05	NOMPC:GFP vs AR+AR-NOMPC:GFP	0.222222	0.666667	FALSE
w*;nompC[1],UAS-AR+AR-NompC::GFP/nompC[3];nompC-GAL4	AR+AR-NOMPC:GFP	8.11421			NOMPC:GFP vs LH+LH-NOMPC:GFP	0.00793651	0.0238095	TRUE
w*;nompC[1],UAS-AR+AR-NompC::GFP/nompC[3];nompC-GAL4	AR+AR-NOMPC:GFP	9.15622			AR+AR-NOMPC:GFP vs LH+LH-NOMPC:GFP	0.00793651	0.0238095	TRUE
w*;nompC[1],UAS-AR+AR-NompC::GFP/nompC[3];nompC-GAL4	AR+AR-NOMPC:GFP	10.4783
w*;nompC[1],UAS-AR+AR-NompC::GFP/nompC[3];nompC-GAL4	AR+AR-NOMPC:GFP	8.87333
w*;nompC[3],UAS-LH+LH-NompC::GFP/nompC[3];nompC-GAL4	LH+LH-NOMPC:GFP	4.06871
w*;nompC[3],UAS-LH+LH-NompC::GFP/nompC[3];nompC-GAL4	LH+LH-NOMPC:GFP	5.43141
w*;nompC[3],UAS-LH+LH-NompC::GFP/nompC[3];nompC-GAL4	LH+LH-NOMPC:GFP	5.34833
w*;nompC[3],UAS-LH+LH-NompC::GFP/nompC[3];nompC-GAL4	LH+LH-NOMPC:GFP	1.94574
w*;nompC[3],UAS-LH+LH-NompC::GFP/nompC[3];nompC-GAL4	LH+LH-NOMPC:GFP	4.90876

## Sheet: Fig_3_g
genotype_long	genotype	KGSs/Ns_nN*m-1		Group	N	Missing	Mean	Std. Deviation	SE of Mean	Anova	DF	Sum of Squares	Mean Square	F Value	Prob>F	Comparison	Mean Difference	SEM	t Value	Prob	Sig	LCL	UCL
w*;nompC[3],UAS-NompC::GFP/nompC[3];nompC-GAL4	NOMPC:GFP	25.4737		NOMPC:GFP	5	0	17.7557	6.88691	3.07992	Model	2	300.92	150.46	6.82469	0.01049	AR+AR-NOMPC:GFP vs. NOMPC:GFP	-0.29429	2.96961	-0.0991	1	0	-8.54823	7.95965
w*;nompC[3],UAS-NompC::GFP/nompC[3];nompC-GAL4	NOMPC:GFP	24.9669		AR+AR-NOMPC:GFP	5	0	17.4614	2.57432	1.15127	Error	12	264.557	22.0464			LH+LH-NOMPC:GFP vs. NOMPC:GFP	-9.64509	2.96961	-3.24794	0.02095	1	-17.899	-1.39115
w*;nompC[3],UAS-NompC::GFP/nompC[3];nompC-GAL4	NOMPC:GFP	13.7125		LH+LH-NOMPC:GFP	5	0	8.11059	3.47599	1.55451	Total	14	565.476				LH+LH-NOMPC:GFP vs. AR+AR-NOMPC:GFP	-9.3508	2.96961	-3.14884	0.02518	1	-17.6047	-1.09686
w*;nompC[3],UAS-NompC::GFP/nompC[3];nompC-GAL4	NOMPC:GFP	11.1842
w*;nompC[3],UAS-NompC::GFP/nompC[3];nompC-GAL4	NOMPC:GFP	13.4411		Mann_Whitney_U	Comparison	p-value	p-value (Bonferroni corrected)	Reject Null Hypothesis
w*;nompC[1],UAS-AR+AR-NompC::GFP/nompC[3];nompC-GAL4	AR+AR-NOMPC:GFP	15.4861		alpha=0.05	NOMPC:GFP vs AR+AR-NOMPC:GFP	0.690476	1	FALSE
w*;nompC[1],UAS-AR+AR-NompC::GFP/nompC[3];nompC-GAL4	AR+AR-NOMPC:GFP	18.4834			NOMPC:GFP vs LH+LH-NOMPC:GFP	0.015873	0.047619	TRUE
w*;nompC[1],UAS-AR+AR-NompC::GFP/nompC[3];nompC-GAL4	AR+AR-NOMPC:GFP	14.1518			AR+AR-NOMPC:GFP vs LH+LH-NOMPC:GFP	0.00793651	0.0238095	TRUE
w*;nompC[1],UAS-AR+AR-NompC::GFP/nompC[3];nompC-GAL4	AR+AR-NOMPC:GFP	20.4655
w*;nompC[1],UAS-AR+AR-NompC::GFP/nompC[3];nompC-GAL4	AR+AR-NOMPC:GFP	18.7201
w*;nompC[3],UAS-LH+LH-NompC::GFP/nompC[3];nompC-GAL4	LH+LH-NOMPC:GFP	6.78119
w*;nompC[3],UAS-LH+LH-NompC::GFP/nompC[3];nompC-GAL4	LH+LH-NOMPC:GFP	13.1193
w*;nompC[3],UAS-LH+LH-NompC::GFP/nompC[3];nompC-GAL4	LH+LH-NOMPC:GFP	8.21556
w*;nompC[3],UAS-LH+LH-NompC::GFP/nompC[3];nompC-GAL4	LH+LH-NOMPC:GFP	3.54415
w*;nompC[3],UAS-LH+LH-NompC::GFP/nompC[3];nompC-GAL4	LH+LH-NOMPC:GFP	8.89269

## Sheet: Fig_3_h
genotype_long	genotype	EGs_kBT		Group	N	Missing	Mean	Std. Deviation	SE of Mean	Anova	DF	Sum of Squares	Mean Square	F Value	Prob>F	Comparison	Mean Difference	SEM	t Value	Prob	Sig	LCL	UCL
w*;nompC[3],UAS-NompC::GFP/nompC[3];nompC-GAL4	NOMPC:GFP	2.28831		NOMPC:GFP	5	0	4.0034	1.31474	0.58797	Model	2	11.95	5.975	4.80156	0.02938	AR+AR-NOMPC:GFP vs. NOMPC:GFP	0.21876	0.70552	0.31007	1	0	-1.7422	2.17973
w*;nompC[3],UAS-NompC::GFP/nompC[3];nompC-GAL4	NOMPC:GFP	3.05089		AR+AR-NOMPC:GFP	5	0	4.22216	0.73567	0.329	Error	12	14.9327	1.24439			LH+LH-NOMPC:GFP vs. NOMPC:GFP	-1.77453	0.70552	-2.51521	0.08144	0	-3.73549	0.18644
w*;nompC[3],UAS-NompC::GFP/nompC[3];nompC-GAL4	NOMPC:GFP	5.34363		LH+LH-NOMPC:GFP	5	0	2.22888	1.20971	0.541	Total	14	26.8826				LH+LH-NOMPC:GFP vs. AR+AR-NOMPC:GFP	-1.99329	0.70552	-2.82529	0.04593	1	-3.95425	-0.03232
w*;nompC[3],UAS-NompC::GFP/nompC[3];nompC-GAL4	NOMPC:GFP	5.10766
w*;nompC[3],UAS-NompC::GFP/nompC[3];nompC-GAL4	NOMPC:GFP	4.22652		Mann_Whitney_U	Comparison	p-value	p-value (Bonferroni corrected)	Reject Null Hypothesis
w*;nompC[1],UAS-AR+AR-NompC::GFP/nompC[3];nompC-GAL4	AR+AR-NOMPC:GFP	4.53306		alpha=0.05	NOMPC:GFP vs AR+AR-NOMPC:GFP	1	1	FALSE
w*;nompC[1],UAS-AR+AR-NompC::GFP/nompC[3];nompC-GAL4	AR+AR-NOMPC:GFP	4.1013			NOMPC:GFP vs LH+LH-NOMPC:GFP	0.0555556	0.166667	FALSE
w*;nompC[1],UAS-AR+AR-NompC::GFP/nompC[3];nompC-GAL4	AR+AR-NOMPC:GFP	5.30093			AR+AR-NOMPC:GFP vs LH+LH-NOMPC:GFP	0.0555556	0.166667	FALSE
w*;nompC[1],UAS-AR+AR-NompC::GFP/nompC[3];nompC-GAL4	AR+AR-NOMPC:GFP	3.38171
w*;nompC[1],UAS-AR+AR-NompC::GFP/nompC[3];nompC-GAL4	AR+AR-NOMPC:GFP	3.79382
w*;nompC[3],UAS-LH+LH-NompC::GFP/nompC[3];nompC-GAL4	LH+LH-NOMPC:GFP	1.36346
w*;nompC[3],UAS-LH+LH-NompC::GFP/nompC[3];nompC-GAL4	LH+LH-NOMPC:GFP	1.12405
w*;nompC[3],UAS-LH+LH-NompC::GFP/nompC[3];nompC-GAL4	LH+LH-NOMPC:GFP	2.52249
w*;nompC[3],UAS-LH+LH-NompC::GFP/nompC[3];nompC-GAL4	LH+LH-NOMPC:GFP	4.16087
w*;nompC[3],UAS-LH+LH-NompC::GFP/nompC[3];nompC-GAL4	LH+LH-NOMPC:GFP	1.97351

## Sheet: Fig_3_i
genotype_long	genotype	2EGs_zs_microm		Group	N	Missing	Mean	Std. Deviation	SE of Mean	Anova	DF	Sum of Squares	Mean Square	F Value	Prob>F	Comparison	Mean Difference	SEM	t Value	Prob	Sig	LCL	UCL
w*;nompC[3],UAS-NompC::GFP/nompC[3];nompC-GAL4	NOMPC:GFP	0.85853		NOMPC:GFP	5	0	1.43801	0.48093	0.21508	Model	2	0.13811	0.06906	0.20023	0.82122	AR+AR-NOMPC:GFP vs. NOMPC:GFP	-0.01678	0.37142	-0.04518	1	0	-1.04914	1.01558
w*;nompC[3],UAS-NompC::GFP/nompC[3];nompC-GAL4	NOMPC:GFP	1.00133		AR+AR-NOMPC:GFP	5	0	1.42123	0.23193	0.10372	Error	12	4.13861	0.34488			LH+LH-NOMPC:GFP vs. NOMPC:GFP	0.19464	0.37142	0.52405	1	0	-0.83771	1.227
w*;nompC[3],UAS-NompC::GFP/nompC[3];nompC-GAL4	NOMPC:GFP	1.78815		LH+LH-NOMPC:GFP	5	0	1.63265	0.86578	0.38719	Total	14	4.27672				LH+LH-NOMPC:GFP vs. AR+AR-NOMPC:GFP	0.21142	0.37142	0.56922	1	0	-0.82093	1.24378
w*;nompC[3],UAS-NompC::GFP/nompC[3];nompC-GAL4	NOMPC:GFP	1.93577
w*;nompC[3],UAS-NompC::GFP/nompC[3];nompC-GAL4	NOMPC:GFP	1.60627		Mann_Whitney_U	Comparison	p-value	p-value (Bonferroni corrected)	Reject Null Hypothesis
w*;nompC[1],UAS-AR+AR-NompC::GFP/nompC[3];nompC-GAL4	AR+AR-NOMPC:GFP	1.54978		alpha=0.05	NOMPC:GFP vs AR+AR-NOMPC:GFP	0.84127	1	FALSE
w*;nompC[1],UAS-AR+AR-NompC::GFP/nompC[3];nompC-GAL4	AR+AR-NOMPC:GFP	1.34932			NOMPC:GFP vs LH+LH-NOMPC:GFP	0.84127	1	FALSE
w*;nompC[1],UAS-AR+AR-NompC::GFP/nompC[3];nompC-GAL4	AR+AR-NOMPC:GFP	1.75313			AR+AR-NOMPC:GFP vs LH+LH-NOMPC:GFP	1	1	FALSE
w*;nompC[1],UAS-AR+AR-NompC::GFP/nompC[3];nompC-GAL4	AR+AR-NOMPC:GFP	1.1644
w*;nompC[1],UAS-AR+AR-NompC::GFP/nompC[3];nompC-GAL4	AR+AR-NOMPC:GFP	1.28952
w*;nompC[3],UAS-LH+LH-NompC::GFP/nompC[3];nompC-GAL4	LH+LH-NOMPC:GFP	1.28444
w*;nompC[3],UAS-LH+LH-NompC::GFP/nompC[3];nompC-GAL4	LH+LH-NOMPC:GFP	0.83846
w*;nompC[3],UAS-LH+LH-NompC::GFP/nompC[3];nompC-GAL4	LH+LH-NOMPC:GFP	1.58723
w*;nompC[3],UAS-LH+LH-NompC::GFP/nompC[3];nompC-GAL4	LH+LH-NOMPC:GFP	3.10371
w*;nompC[3],UAS-LH+LH-NompC::GFP/nompC[3];nompC-GAL4	LH+LH-NOMPC:GFP	1.34942
