# Supplementary material for: NOMPC ion channel hinge forms a gating spring that initiates mechanosensation
Source: Springer Nature journal article supplement (doi:10.1038/s41593-024-01849-3), 2025-01-06
Supplement: MOESM10 [file 41593_2024_1849_MOESM10_ESM.xlsx]

## Sheet: Fig_4_b
nompc_domain	condition	rdsm_nm	norm_probability
LH	equilibrium	0	0
LH	equilibrium	0.003	0
LH	equilibrium	0.006	0
LH	equilibrium	0.009	0
LH	equilibrium	0.012	0
LH	equilibrium	0.015	0
LH	equilibrium	0.018	0
LH	equilibrium	0.021	0
LH	equilibrium	0.024	0
LH	equilibrium	0.027	0
LH	equilibrium	0.03	3
LH	equilibrium	0.033	0
LH	equilibrium	0.036	0
LH	equilibrium	0.039	0
LH	equilibrium	0.042	0
LH	equilibrium	0.045	0
LH	equilibrium	0.048	0
LH	equilibrium	0.051	0
LH	equilibrium	0.054	0
LH	equilibrium	0.057	0
LH	equilibrium	0.06	0
LH	equilibrium	0.063	0
LH	equilibrium	0.066	0
LH	equilibrium	0.069	1
LH	equilibrium	0.072	0
LH	equilibrium	0.075	3
LH	equilibrium	0.078	3
LH	equilibrium	0.081	2
LH	equilibrium	0.084	1
LH	equilibrium	0.087	9
LH	equilibrium	0.09	7
LH	equilibrium	0.093	11
LH	equilibrium	0.096	29
LH	equilibrium	0.099	49
LH	equilibrium	0.102	72
LH	equilibrium	0.105	82
LH	equilibrium	0.108	126
LH	equilibrium	0.111	221
LH	equilibrium	0.114	316
LH	equilibrium	0.117	431
LH	equilibrium	0.12	547
LH	equilibrium	0.123	713
LH	equilibrium	0.126	808
LH	equilibrium	0.129	875
LH	equilibrium	0.132	920
LH	equilibrium	0.135	1006
LH	equilibrium	0.138	956
LH	equilibrium	0.141	998
LH	equilibrium	0.144	921
LH	equilibrium	0.147	896
LH	equilibrium	0.15	789
LH	equilibrium	0.153	707
LH	equilibrium	0.156	674
LH	equilibrium	0.159	615
LH	equilibrium	0.162	561
LH	equilibrium	0.165	496
LH	equilibrium	0.168	417
LH	equilibrium	0.171	415
LH	equilibrium	0.174	391
LH	equilibrium	0.177	394
LH	equilibrium	0.18	352
LH	equilibrium	0.183	357
LH	equilibrium	0.186	391
LH	equilibrium	0.189	404
LH	equilibrium	0.192	381
LH	equilibrium	0.195	363
LH	equilibrium	0.198	373
LH	equilibrium	0.201	401
LH	equilibrium	0.204	352
LH	equilibrium	0.207	358
LH	equilibrium	0.21	329
LH	equilibrium	0.213	310
LH	equilibrium	0.216	288
LH	equilibrium	0.219	285
LH	equilibrium	0.222	271
LH	equilibrium	0.225	279
LH	equilibrium	0.228	251
LH	equilibrium	0.231	251
LH	equilibrium	0.234	243
LH	equilibrium	0.237	229
LH	equilibrium	0.24	221
LH	equilibrium	0.243	244
LH	equilibrium	0.246	209
LH	equilibrium	0.249	184
LH	equilibrium	0.252	166
LH	equilibrium	0.255	157
LH	equilibrium	0.258	127
LH	equilibrium	0.261	137
LH	equilibrium	0.264	111
LH	equilibrium	0.267	96
LH	equilibrium	0.27	97
LH	equilibrium	0.273	60
LH	equilibrium	0.276	54
LH	equilibrium	0.279	39
LH	equilibrium	0.282	39
LH	equilibrium	0.285	35
LH	equilibrium	0.288	29
LH	equilibrium	0.291	16
LH	equilibrium	0.294	5
LH	equilibrium	0.297	7
LH	equilibrium	0.3	9
LH	equilibrium	0.303	9
LH	equilibrium	0.306	2
LH	equilibrium	0.309	3
LH	equilibrium	0.312	4
LH	equilibrium	0.315	4
LH	equilibrium	0.318	0
LH	equilibrium	0.321	0
LH	equilibrium	0.324	0
LH	equilibrium	0.327	0
LH	equilibrium	0.33	1
LH	equilibrium	0.333	1
LH	equilibrium	0.336	0
LH	equilibrium	0.339	0
LH	equilibrium	0.342	0
LH	equilibrium	0.345	0
LH	equilibrium	0.348	0
LH	equilibrium	0.351	0
LH	equilibrium	0.354	1
LH	equilibrium	0.357	0
LH	equilibrium	0.36	0
LH	equilibrium	0.363	0
LH	equilibrium	0.366	0
LH	equilibrium	0.369	0
LH	equilibrium	0.372	0
LH	equilibrium	0.375	0
LH	equilibrium	0.378	0
LH	equilibrium	0.381	0
LH	equilibrium	0.384	0
LH	equilibrium	0.387	0
LH	equilibrium	0.39	0
LH	equilibrium	0.393	0
LH	equilibrium	0.396	0
LH	equilibrium	0.399	0
LH	equilibrium	0.402	0
LH	equilibrium	0.405	0
LH	equilibrium	0.408	0
LH	equilibrium	0.411	0
LH	equilibrium	0.414	0
LH	equilibrium	0.417	0
LH	equilibrium	0.42	0
LH	equilibrium	0.423	0
LH	equilibrium	0.426	0
LH	equilibrium	0.429	0
LH	equilibrium	0.432	0
LH	equilibrium	0.435	0
LH	equilibrium	0.438	0
LH	equilibrium	0.441	0
LH	equilibrium	0.444	0
LH	equilibrium	0.447	0
LH	equilibrium	0.45	0
LH	equilibrium	0.453	0
LH	equilibrium	0.456	0
LH	equilibrium	0.459	0
LH	equilibrium	0.462	0
LH	equilibrium	0.465	0
LH	equilibrium	0.468	0
LH	equilibrium	0.471	0
LH	equilibrium	0.474	0
LH	equilibrium	0.477	0
LH	equilibrium	0.48	0
LH	equilibrium	0.483	0
LH	equilibrium	0.486	0
LH	equilibrium	0.489	0
LH	equilibrium	0.492	0
LH	equilibrium	0.495	0
LH	equilibrium	0.498	0
LH	equilibrium	0.501	0
LH	equilibrium	0.504	0
LH	equilibrium	0.507	0
LH	equilibrium	0.51	0
LH	equilibrium	0.513	0
LH	equilibrium	0.516	0
LH	equilibrium	0.519	0
LH	equilibrium	0.522	0
LH	equilibrium	0.525	0
LH	equilibrium	0.528	0
LH	equilibrium	0.531	0
LH	equilibrium	0.534	0
LH	equilibrium	0.537	0
LH	equilibrium	0.54	0
LH	equilibrium	0.543	0
LH	equilibrium	0.546	0
LH	equilibrium	0.549	0
LH	equilibrium	0.552	0
LH	equilibrium	0.555	0
LH	equilibrium	0.558	0
LH	equilibrium	0.561	0
LH	equilibrium	0.564	0
LH	equilibrium	0.567	0
LH	equilibrium	0.57	0
LH	equilibrium	0.573	0
LH	equilibrium	0.576	0
LH	equilibrium	0.579	0
LH	equilibrium	0.582	0
LH	equilibrium	0.585	0
LH	equilibrium	0.588	0
LH	equilibrium	0.591	0
LH	equilibrium	0.594	0
LH	equilibrium	0.597	0
LH	equilibrium	0.6	0
LH	equilibrium	0.603	0
LH	equilibrium	0.606	0
LH	equilibrium	0.609	0
LH	equilibrium	0.612	0
LH	equilibrium	0.615	0
LH	equilibrium	0.618	0
LH	equilibrium	0.621	0
LH	equilibrium	0.624	0
LH	equilibrium	0.627	0
LH	equilibrium	0.63	0
LH	equilibrium	0.633	0
LH	equilibrium	0.636	0
LH	equilibrium	0.639	0
LH	equilibrium	0.642	0
LH	equilibrium	0.645	0
LH	equilibrium	0.648	0
LH	equilibrium	0.651	0
LH	equilibrium	0.654	0
LH	equilibrium	0.657	0
LH	equilibrium	0.66	0
LH	equilibrium	0.663	0
LH	equilibrium	0.666	0
LH	equilibrium	0.669	0
LH	equilibrium	0.672	0
LH	equilibrium	0.675	0
LH	equilibrium	0.678	0
LH	equilibrium	0.681	0
LH	equilibrium	0.684	0
LH	equilibrium	0.687	0
LH	equilibrium	0.69	0
LH	equilibrium	0.693	0
LH	equilibrium	0.696	0
LH	equilibrium	0.699	0
LH	equilibrium	0.702	0
LH	equilibrium	0.705	0
LH	equilibrium	0.708	0
LH	equilibrium	0.711	0
LH	equilibrium	0.714	0
LH	equilibrium	0.717	0
LH	equilibrium	0.72	0
LH	equilibrium	0.723	0
LH	equilibrium	0.726	0
LH	equilibrium	0.729	0
LH	equilibrium	0.732	0
LH	equilibrium	0.735	0
LH	equilibrium	0.738	0
LH	equilibrium	0.741	0
LH	equilibrium	0.744	0
LH	equilibrium	0.747	0
LH	equilibrium	0.75	0
LH	equilibrium	0.753	0
LH	equilibrium	0.756	0
LH	equilibrium	0.759	0
LH	equilibrium	0.762	0
LH	equilibrium	0.765	0
LH	equilibrium	0.768	0
LH	equilibrium	0.771	0
LH	equilibrium	0.774	0
LH	equilibrium	0.777	0
LH	equilibrium	0.78	0
LH	equilibrium	0.783	0
LH	equilibrium	0.786	0
LH	equilibrium	0.789	0
LH	equilibrium	0.792	0
LH	equilibrium	0.795	0
LH	equilibrium	0.798	0
LH	equilibrium	0.801	0
LH	equilibrium	0.804	0
LH	equilibrium	0.807	0
LH	equilibrium	0.81	0
LH	equilibrium	0.813	0
LH	equilibrium	0.816	0
LH	equilibrium	0.819	0
LH	equilibrium	0.822	0
LH	equilibrium	0.825	0
LH	equilibrium	0.828	0
LH	equilibrium	0.831	0
LH	equilibrium	0.834	0
LH	equilibrium	0.837	0
LH	equilibrium	0.84	0
LH	equilibrium	0.843	0
LH	equilibrium	0.846	0
LH	equilibrium	0.849	0
LH	equilibrium	0.852	0
LH	equilibrium	0.855	0
LH	equilibrium	0.858	0
LH	equilibrium	0.861	0
LH	equilibrium	0.864	0
LH	equilibrium	0.867	0
LH	equilibrium	0.87	0
LH	equilibrium	0.873	0
LH	equilibrium	0.876	0
LH	equilibrium	0.879	0
LH	equilibrium	0.882	0
LH	equilibrium	0.885	0
LH	equilibrium	0.888	0
LH	equilibrium	0.891	0
LH	equilibrium	0.894	0
LH	equilibrium	0.897	0
LH	equilibrium	0.9	0
LH	equilibrium	0.903	0
LH	equilibrium	0.906	0
LH	equilibrium	0.909	0
LH	equilibrium	0.912	0
LH	equilibrium	0.915	0
LH	equilibrium	0.918	0
LH	equilibrium	0.921	0
LH	equilibrium	0.924	0
LH	equilibrium	0.927	0
LH	equilibrium	0.93	0
LH	equilibrium	0.933	0
LH	equilibrium	0.936	0
LH	equilibrium	0.939	0
LH	equilibrium	0.942	0
LH	equilibrium	0.945	0
LH	equilibrium	0.948	0
LH	equilibrium	0.951	0
LH	equilibrium	0.954	0
LH	equilibrium	0.957	0
LH	equilibrium	0.96	0
LH	equilibrium	0.963	0
LH	equilibrium	0.966	0
LH	equilibrium	0.969	0
LH	equilibrium	0.972	0
LH	equilibrium	0.975	0
LH	equilibrium	0.978	0
LH	equilibrium	0.981	0
LH	equilibrium	0.984	0
LH	equilibrium	0.987	0
LH	equilibrium	0.99	0
LH	equilibrium	0.993	0
LH	equilibrium	0.996	0
LH	equilibrium	0.999	0
LH	equilibrium	1.002	0
LH	equilibrium	1.005	0
LH	equilibrium	1.008	0
LH	equilibrium	1.011	0
LH	equilibrium	1.014	0
LH	equilibrium	1.017	0
LH	equilibrium	1.02	0
LH	equilibrium	1.023	0
LH	equilibrium	1.026	0
LH	equilibrium	1.029	0
LH	equilibrium	1.032	0
LH	equilibrium	1.035	0
LH	equilibrium	1.038	0
LH	equilibrium	1.041	0
LH	equilibrium	1.044	0
LH	equilibrium	1.047	0
LH	equilibrium	1.05	0
LH	equilibrium	1.053	0
LH	equilibrium	1.056	0
LH	equilibrium	1.059	0
LH	equilibrium	1.062	0
LH	equilibrium	1.065	0
LH	equilibrium	1.068	0
LH	equilibrium	1.071	0
LH	equilibrium	1.074	0
LH	equilibrium	1.077	0
LH	equilibrium	1.08	0
LH	equilibrium	1.083	0
LH	equilibrium	1.086	0
LH	equilibrium	1.089	0
LH	equilibrium	1.092	0
LH	equilibrium	1.095	0
LH	equilibrium	1.098	0
LH	equilibrium	1.101	0
LH	equilibrium	1.104	0
LH	equilibrium	1.107	0
LH	equilibrium	1.11	0
LH	equilibrium	1.113	0
LH	equilibrium	1.116	0
LH	equilibrium	1.119	0
LH	equilibrium	1.122	0
LH	equilibrium	1.125	0
LH	equilibrium	1.128	0
LH	equilibrium	1.131	0
LH	equilibrium	1.134	0
LH	equilibrium	1.137	0
LH	equilibrium	1.14	0
LH	equilibrium	1.143	0
LH	equilibrium	1.146	0
LH	equilibrium	1.149	0
LH	equilibrium	1.152	0
LH	equilibrium	1.155	0
LH	equilibrium	1.158	0
LH	equilibrium	1.161	0
LH	equilibrium	1.164	0
LH	equilibrium	1.167	0
LH	equilibrium	1.17	0
LH	equilibrium	1.173	0
LH	equilibrium	1.176	0
LH	equilibrium	1.179	0
LH	equilibrium	1.182	0
LH	equilibrium	1.185	0
LH	equilibrium	1.188	0
LH	equilibrium	1.191	0
LH	equilibrium	1.194	0
LH	equilibrium	1.197	0
LH	equilibrium	1.2	0
LH	equilibrium	1.203	0
LH	equilibrium	1.206	0
LH	equilibrium	1.209	0
LH	equilibrium	1.212	0
LH	equilibrium	1.215	0
LH	equilibrium	1.218	0
LH	equilibrium	1.221	0
LH	equilibrium	1.224	0
LH	equilibrium	1.227	0
LH	equilibrium	1.23	0
LH	equilibrium	1.233	0
LH	equilibrium	1.236	0
LH	equilibrium	1.239	0
LH	equilibrium	1.242	0
LH	equilibrium	1.245	0
LH	equilibrium	1.248	0
LH	equilibrium	1.251	0
LH	equilibrium	1.254	0
LH	equilibrium	1.257	0
LH	equilibrium	1.26	0
LH	equilibrium	1.263	0
LH	equilibrium	1.266	0
LH	equilibrium	1.269	0
LH	equilibrium	1.272	0
LH	equilibrium	1.275	0
LH	equilibrium	1.278	0
LH	equilibrium	1.281	0
LH	equilibrium	1.284	0
LH	equilibrium	1.287	0
LH	equilibrium	1.29	0
LH	equilibrium	1.293	0
LH	equilibrium	1.296	0
LH	equilibrium	1.299	0
LH	equilibrium	1.302	0
LH	equilibrium	1.305	0
LH	equilibrium	1.308	0
LH	equilibrium	1.311	0
LH	equilibrium	1.314	0
LH	equilibrium	1.317	0
LH	equilibrium	1.32	0
LH	equilibrium	1.323	0
LH	equilibrium	1.326	0
LH	equilibrium	1.329	0
LH	equilibrium	1.332	0
LH	equilibrium	1.335	0
LH	equilibrium	1.338	0
LH	equilibrium	1.341	0
LH	equilibrium	1.344	0
LH	equilibrium	1.347	0
LH	equilibrium	1.35	0
LH	equilibrium	1.353	0
LH	equilibrium	1.356	0
LH	equilibrium	1.359	0
LH	equilibrium	1.362	0
LH	equilibrium	1.365	0
LH	equilibrium	1.368	0
LH	equilibrium	1.371	0
LH	equilibrium	1.374	0
LH	equilibrium	1.377	0
LH	equilibrium	1.38	0
LH	equilibrium	1.383	0
LH	equilibrium	1.386	0
LH	equilibrium	1.389	0
LH	equilibrium	1.392	0
LH	equilibrium	1.395	0
LH	equilibrium	1.398	0
LH	equilibrium	1.401	0
LH	equilibrium	1.404	0
LH	equilibrium	1.407	0
LH	equilibrium	1.41	0
LH	equilibrium	1.413	0
LH	equilibrium	1.416	0
LH	equilibrium	1.419	0
LH	equilibrium	1.422	0
LH	equilibrium	1.425	0
LH	equilibrium	1.428	0
LH	equilibrium	1.431	0
LH	equilibrium	1.434	0
LH	equilibrium	1.437	0
LH	equilibrium	1.44	0
LH	equilibrium	1.443	0
LH	equilibrium	1.446	0
LH	equilibrium	1.449	0
LH	equilibrium	1.452	0
LH	equilibrium	1.455	0
LH	equilibrium	1.458	0
LH	equilibrium	1.461	0
LH	equilibrium	1.464	0
LH	equilibrium	1.467	0
LH	equilibrium	1.47	0
LH	equilibrium	1.473	0
LH	equilibrium	1.476	0
LH	equilibrium	1.479	0
LH	equilibrium	1.482	0
LH	equilibrium	1.485	0
LH	equilibrium	1.488	0
LH	equilibrium	1.491	0
LH	equilibrium	1.494	0
LH	equilibrium	1.497	0
LH	pushing	0	0
LH	pushing	0.003	0
LH	pushing	0.006	0
LH	pushing	0.009	0
LH	pushing	0.012	0
LH	pushing	0.015	0
LH	pushing	0.018	0
LH	pushing	0.021	0
LH	pushing	0.024	0
LH	pushing	0.027	0
LH	pushing	0.03	3
LH	pushing	0.033	0
LH	pushing	0.036	0
LH	pushing	0.039	0
LH	pushing	0.042	0
LH	pushing	0.045	0
LH	pushing	0.048	0
LH	pushing	0.051	0
LH	pushing	0.054	0
LH	pushing	0.057	0
LH	pushing	0.06	0
LH	pushing	0.063	0
LH	pushing	0.066	0
LH	pushing	0.069	0
LH	pushing	0.072	0
LH	pushing	0.075	3
LH	pushing	0.078	3
LH	pushing	0.081	2
LH	pushing	0.084	1
LH	pushing	0.087	8
LH	pushing	0.09	10
LH	pushing	0.093	11
LH	pushing	0.096	22
LH	pushing	0.099	37
LH	pushing	0.102	46
LH	pushing	0.105	49
LH	pushing	0.108	74
LH	pushing	0.111	109
LH	pushing	0.114	163
LH	pushing	0.117	204
LH	pushing	0.12	297
LH	pushing	0.123	455
LH	pushing	0.126	541
LH	pushing	0.129	653
LH	pushing	0.132	776
LH	pushing	0.135	778
LH	pushing	0.138	755
LH	pushing	0.141	833
LH	pushing	0.144	838
LH	pushing	0.147	831
LH	pushing	0.15	778
LH	pushing	0.153	842
LH	pushing	0.156	802
LH	pushing	0.159	804
LH	pushing	0.162	738
LH	pushing	0.165	797
LH	pushing	0.168	744
LH	pushing	0.171	691
LH	pushing	0.174	609
LH	pushing	0.177	608
LH	pushing	0.18	527
LH	pushing	0.183	479
LH	pushing	0.186	458
LH	pushing	0.189	396
LH	pushing	0.192	413
LH	pushing	0.195	392
LH	pushing	0.198	381
LH	pushing	0.201	349
LH	pushing	0.204	352
LH	pushing	0.207	320
LH	pushing	0.21	315
LH	pushing	0.213	301
LH	pushing	0.216	337
LH	pushing	0.219	297
LH	pushing	0.222	292
LH	pushing	0.225	273
LH	pushing	0.228	261
LH	pushing	0.231	210
LH	pushing	0.234	196
LH	pushing	0.237	189
LH	pushing	0.24	147
LH	pushing	0.243	163
LH	pushing	0.246	130
LH	pushing	0.249	110
LH	pushing	0.252	115
LH	pushing	0.255	88
LH	pushing	0.258	90
LH	pushing	0.261	89
LH	pushing	0.264	88
LH	pushing	0.267	63
LH	pushing	0.27	87
LH	pushing	0.273	60
LH	pushing	0.276	52
LH	pushing	0.279	62
LH	pushing	0.282	58
LH	pushing	0.285	36
LH	pushing	0.288	47
LH	pushing	0.291	52
LH	pushing	0.294	42
LH	pushing	0.297	39
LH	pushing	0.3	29
LH	pushing	0.303	29
LH	pushing	0.306	39
LH	pushing	0.309	33
LH	pushing	0.312	38
LH	pushing	0.315	23
LH	pushing	0.318	27
LH	pushing	0.321	33
LH	pushing	0.324	33
LH	pushing	0.327	35
LH	pushing	0.33	43
LH	pushing	0.333	30
LH	pushing	0.336	37
LH	pushing	0.339	30
LH	pushing	0.342	32
LH	pushing	0.345	45
LH	pushing	0.348	34
LH	pushing	0.351	30
LH	pushing	0.354	30
LH	pushing	0.357	22
LH	pushing	0.36	21
LH	pushing	0.363	14
LH	pushing	0.366	7
LH	pushing	0.369	9
LH	pushing	0.372	12
LH	pushing	0.375	3
LH	pushing	0.378	3
LH	pushing	0.381	4
LH	pushing	0.384	3
LH	pushing	0.387	1
LH	pushing	0.39	0
LH	pushing	0.393	0
LH	pushing	0.396	0
LH	pushing	0.399	0
LH	pushing	0.402	0
LH	pushing	0.405	0
LH	pushing	0.408	0
LH	pushing	0.411	0
LH	pushing	0.414	0
LH	pushing	0.417	0
LH	pushing	0.42	0
LH	pushing	0.423	0
LH	pushing	0.426	0
LH	pushing	0.429	0
LH	pushing	0.432	0
LH	pushing	0.435	0
LH	pushing	0.438	0
LH	pushing	0.441	0
LH	pushing	0.444	0
LH	pushing	0.447	0
LH	pushing	0.45	0
LH	pushing	0.453	0
LH	pushing	0.456	0
LH	pushing	0.459	0
LH	pushing	0.462	0
LH	pushing	0.465	0
LH	pushing	0.468	0
LH	pushing	0.471	0
LH	pushing	0.474	0
LH	pushing	0.477	0
LH	pushing	0.48	0
LH	pushing	0.483	0
LH	pushing	0.486	0
LH	pushing	0.489	0
LH	pushing	0.492	0
LH	pushing	0.495	0
LH	pushing	0.498	0
LH	pushing	0.501	0
LH	pushing	0.504	0
LH	pushing	0.507	0
LH	pushing	0.51	0
LH	pushing	0.513	0
LH	pushing	0.516	0
LH	pushing	0.519	0
LH	pushing	0.522	0
LH	pushing	0.525	0
LH	pushing	0.528	0
LH	pushing	0.531	0
LH	pushing	0.534	0
LH	pushing	0.537	0
LH	pushing	0.54	0
LH	pushing	0.543	0
LH	pushing	0.546	0
LH	pushing	0.549	0
LH	pushing	0.552	0
LH	pushing	0.555	0
LH	pushing	0.558	0
LH	pushing	0.561	0
LH	pushing	0.564	0
LH	pushing	0.567	0
LH	pushing	0.57	0
LH	pushing	0.573	0
LH	pushing	0.576	0
LH	pushing	0.579	0
LH	pushing	0.582	0
LH	pushing	0.585	0
LH	pushing	0.588	0
LH	pushing	0.591	0
LH	pushing	0.594	0
LH	pushing	0.597	0
LH	pushing	0.6	0
LH	pushing	0.603	0
LH	pushing	0.606	0
LH	pushing	0.609	0
LH	pushing	0.612	0
LH	pushing	0.615	0
LH	pushing	0.618	0
LH	pushing	0.621	0
LH	pushing	0.624	0
LH	pushing	0.627	0
LH	pushing	0.63	0
LH	pushing	0.633	0
LH	pushing	0.636	0
LH	pushing	0.639	0
LH	pushing	0.642	0
LH	pushing	0.645	0
LH	pushing	0.648	0
LH	pushing	0.651	0
LH	pushing	0.654	0
LH	pushing	0.657	0
LH	pushing	0.66	0
LH	pushing	0.663	0
LH	pushing	0.666	0
LH	pushing	0.669	0
LH	pushing	0.672	0
LH	pushing	0.675	0
LH	pushing	0.678	0
LH	pushing	0.681	0
LH	pushing	0.684	0
LH	pushing	0.687	0
LH	pushing	0.69	0
LH	pushing	0.693	0
LH	pushing	0.696	0
LH	pushing	0.699	0
LH	pushing	0.702	0
LH	pushing	0.705	0
LH	pushing	0.708	0
LH	pushing	0.711	0
LH	pushing	0.714	0
LH	pushing	0.717	0
LH	pushing	0.72	0
LH	pushing	0.723	0
LH	pushing	0.726	0
LH	pushing	0.729	0
LH	pushing	0.732	0
LH	pushing	0.735	0
LH	pushing	0.738	0
LH	pushing	0.741	0
LH	pushing	0.744	0
LH	pushing	0.747	0
LH	pushing	0.75	0
LH	pushing	0.753	0
LH	pushing	0.756	0
LH	pushing	0.759	0
LH	pushing	0.762	0
LH	pushing	0.765	0
LH	pushing	0.768	0
LH	pushing	0.771	0
LH	pushing	0.774	0
LH	pushing	0.777	0
LH	pushing	0.78	0
LH	pushing	0.783	0
LH	pushing	0.786	0
LH	pushing	0.789	0
LH	pushing	0.792	0
LH	pushing	0.795	0
LH	pushing	0.798	0
LH	pushing	0.801	0
LH	pushing	0.804	0
LH	pushing	0.807	0
LH	pushing	0.81	0
LH	pushing	0.813	0
LH	pushing	0.816	0
LH	pushing	0.819	0
LH	pushing	0.822	0
LH	pushing	0.825	0
LH	pushing	0.828	0
LH	pushing	0.831	0
LH	pushing	0.834	0
LH	pushing	0.837	0
LH	pushing	0.84	0
LH	pushing	0.843	0
LH	pushing	0.846	0
LH	pushing	0.849	0
LH	pushing	0.852	0
LH	pushing	0.855	0
LH	pushing	0.858	0
LH	pushing	0.861	0
LH	pushing	0.864	0
LH	pushing	0.867	0
LH	pushing	0.87	0
LH	pushing	0.873	0
LH	pushing	0.876	0
LH	pushing	0.879	0
LH	pushing	0.882	0
LH	pushing	0.885	0
LH	pushing	0.888	0
LH	pushing	0.891	0
LH	pushing	0.894	0
LH	pushing	0.897	0
LH	pushing	0.9	0
LH	pushing	0.903	0
LH	pushing	0.906	0
LH	pushing	0.909	0
LH	pushing	0.912	0
LH	pushing	0.915	0
LH	pushing	0.918	0
LH	pushing	0.921	0
LH	pushing	0.924	0
LH	pushing	0.927	0
LH	pushing	0.93	0
LH	pushing	0.933	0
LH	pushing	0.936	0
LH	pushing	0.939	0
LH	pushing	0.942	0
LH	pushing	0.945	0
LH	pushing	0.948	0
LH	pushing	0.951	0
LH	pushing	0.954	0
LH	pushing	0.957	0
LH	pushing	0.96	0
LH	pushing	0.963	0
LH	pushing	0.966	0
LH	pushing	0.969	0
LH	pushing	0.972	0
LH	pushing	0.975	0
LH	pushing	0.978	0
LH	pushing	0.981	0
LH	pushing	0.984	0
LH	pushing	0.987	0
LH	pushing	0.99	0
LH	pushing	0.993	0
LH	pushing	0.996	0
LH	pushing	0.999	0
LH	pushing	1.002	0
LH	pushing	1.005	0
LH	pushing	1.008	0
LH	pushing	1.011	0
LH	pushing	1.014	0
LH	pushing	1.017	0
LH	pushing	1.02	0
LH	pushing	1.023	0
LH	pushing	1.026	0
LH	pushing	1.029	0
LH	pushing	1.032	0
LH	pushing	1.035	0
LH	pushing	1.038	0
LH	pushing	1.041	0
LH	pushing	1.044	0
LH	pushing	1.047	0
LH	pushing	1.05	0
LH	pushing	1.053	0
LH	pushing	1.056	0
LH	pushing	1.059	0
LH	pushing	1.062	0
LH	pushing	1.065	0
LH	pushing	1.068	0
LH	pushing	1.071	0
LH	pushing	1.074	0
LH	pushing	1.077	0
LH	pushing	1.08	0
LH	pushing	1.083	0
LH	pushing	1.086	0
LH	pushing	1.089	0
LH	pushing	1.092	0
LH	pushing	1.095	0
LH	pushing	1.098	0
LH	pushing	1.101	0
LH	pushing	1.104	0
LH	pushing	1.107	0
LH	pushing	1.11	0
LH	pushing	1.113	0
LH	pushing	1.116	0
LH	pushing	1.119	0
LH	pushing	1.122	0
LH	pushing	1.125	0
LH	pushing	1.128	0
LH	pushing	1.131	0
LH	pushing	1.134	0
LH	pushing	1.137	0
LH	pushing	1.14	0
LH	pushing	1.143	0
LH	pushing	1.146	0
LH	pushing	1.149	0
LH	pushing	1.152	0
LH	pushing	1.155	0
LH	pushing	1.158	0
LH	pushing	1.161	0
LH	pushing	1.164	0
LH	pushing	1.167	0
LH	pushing	1.17	0
LH	pushing	1.173	0
LH	pushing	1.176	0
LH	pushing	1.179	0
LH	pushing	1.182	0
LH	pushing	1.185	0
LH	pushing	1.188	0
LH	pushing	1.191	0
LH	pushing	1.194	0
LH	pushing	1.197	0
LH	pushing	1.2	0
LH	pushing	1.203	0
LH	pushing	1.206	0
LH	pushing	1.209	0
LH	pushing	1.212	0
LH	pushing	1.215	0
LH	pushing	1.218	0
LH	pushing	1.221	0
LH	pushing	1.224	0
LH	pushing	1.227	0
LH	pushing	1.23	0
LH	pushing	1.233	0
LH	pushing	1.236	0
LH	pushing	1.239	0
LH	pushing	1.242	0
LH	pushing	1.245	0
LH	pushing	1.248	0
LH	pushing	1.251	0
LH	pushing	1.254	0
LH	pushing	1.257	0
LH	pushing	1.26	0
LH	pushing	1.263	0
LH	pushing	1.266	0
LH	pushing	1.269	0
LH	pushing	1.272	0
LH	pushing	1.275	0
LH	pushing	1.278	0
LH	pushing	1.281	0
LH	pushing	1.284	0
LH	pushing	1.287	0
LH	pushing	1.29	0
LH	pushing	1.293	0
LH	pushing	1.296	0
LH	pushing	1.299	0
LH	pushing	1.302	0
LH	pushing	1.305	0
LH	pushing	1.308	0
LH	pushing	1.311	0
LH	pushing	1.314	0
LH	pushing	1.317	0
LH	pushing	1.32	0
LH	pushing	1.323	0
LH	pushing	1.326	0
LH	pushing	1.329	0
LH	pushing	1.332	0
LH	pushing	1.335	0
LH	pushing	1.338	0
LH	pushing	1.341	0
LH	pushing	1.344	0
LH	pushing	1.347	0
LH	pushing	1.35	0
LH	pushing	1.353	0
LH	pushing	1.356	0
LH	pushing	1.359	0
LH	pushing	1.362	0
LH	pushing	1.365	0
LH	pushing	1.368	0
LH	pushing	1.371	0
LH	pushing	1.374	0
LH	pushing	1.377	0
LH	pushing	1.38	0
LH	pushing	1.383	0
LH	pushing	1.386	0
LH	pushing	1.389	0
LH	pushing	1.392	0
LH	pushing	1.395	0
LH	pushing	1.398	0
LH	pushing	1.401	0
LH	pushing	1.404	0
LH	pushing	1.407	0
LH	pushing	1.41	0
LH	pushing	1.413	0
LH	pushing	1.416	0
LH	pushing	1.419	0
LH	pushing	1.422	0
LH	pushing	1.425	0
LH	pushing	1.428	0
LH	pushing	1.431	0
LH	pushing	1.434	0
LH	pushing	1.437	0
LH	pushing	1.44	0
LH	pushing	1.443	0
LH	pushing	1.446	0
LH	pushing	1.449	0
LH	pushing	1.452	0
LH	pushing	1.455	0
LH	pushing	1.458	0
LH	pushing	1.461	0
LH	pushing	1.464	0
LH	pushing	1.467	0
LH	pushing	1.47	0
LH	pushing	1.473	0
LH	pushing	1.476	0
LH	pushing	1.479	0
LH	pushing	1.482	0
LH	pushing	1.485	0
LH	pushing	1.488	0
LH	pushing	1.491	0
LH	pushing	1.494	0
LH	pushing	1.497	0
LH	pulling	0	0
LH	pulling	0.003	0
LH	pulling	0.006	0
LH	pulling	0.009	0
LH	pulling	0.012	0
LH	pulling	0.015	0
LH	pulling	0.018	0
LH	pulling	0.021	0
LH	pulling	0.024	0
LH	pulling	0.027	0
LH	pulling	0.03	3
LH	pulling	0.033	0
LH	pulling	0.036	0
LH	pulling	0.039	0
LH	pulling	0.042	0
LH	pulling	0.045	0
LH	pulling	0.048	0
LH	pulling	0.051	0
LH	pulling	0.054	0
LH	pulling	0.057	0
LH	pulling	0.06	0
LH	pulling	0.063	0
LH	pulling	0.066	0
LH	pulling	0.069	0
LH	pulling	0.072	0
LH	pulling	0.075	3
LH	pulling	0.078	3
LH	pulling	0.081	0
LH	pulling	0.084	5
LH	pulling	0.087	10
LH	pulling	0.09	15
LH	pulling	0.093	14
LH	pulling	0.096	14
LH	pulling	0.099	28
LH	pulling	0.102	33
LH	pulling	0.105	63
LH	pulling	0.108	63
LH	pulling	0.111	107
LH	pulling	0.114	109
LH	pulling	0.117	150
LH	pulling	0.12	191
LH	pulling	0.123	266
LH	pulling	0.126	310
LH	pulling	0.129	381
LH	pulling	0.132	448
LH	pulling	0.135	530
LH	pulling	0.138	593
LH	pulling	0.141	625
LH	pulling	0.144	705
LH	pulling	0.147	726
LH	pulling	0.15	781
LH	pulling	0.153	776
LH	pulling	0.156	767
LH	pulling	0.159	773
LH	pulling	0.162	799
LH	pulling	0.165	763
LH	pulling	0.168	747
LH	pulling	0.171	724
LH	pulling	0.174	696
LH	pulling	0.177	662
LH	pulling	0.18	592
LH	pulling	0.183	559
LH	pulling	0.186	515
LH	pulling	0.189	470
LH	pulling	0.192	454
LH	pulling	0.195	421
LH	pulling	0.198	412
LH	pulling	0.201	388
LH	pulling	0.204	371
LH	pulling	0.207	366
LH	pulling	0.21	323
LH	pulling	0.213	330
LH	pulling	0.216	267
LH	pulling	0.219	284
LH	pulling	0.222	277
LH	pulling	0.225	252
LH	pulling	0.228	253
LH	pulling	0.231	242
LH	pulling	0.234	260
LH	pulling	0.237	221
LH	pulling	0.24	245
LH	pulling	0.243	205
LH	pulling	0.246	218
LH	pulling	0.249	194
LH	pulling	0.252	206
LH	pulling	0.255	163
LH	pulling	0.258	164
LH	pulling	0.261	137
LH	pulling	0.264	121
LH	pulling	0.267	109
LH	pulling	0.27	113
LH	pulling	0.273	115
LH	pulling	0.276	103
LH	pulling	0.279	106
LH	pulling	0.282	101
LH	pulling	0.285	79
LH	pulling	0.288	75
LH	pulling	0.291	64
LH	pulling	0.294	69
LH	pulling	0.297	54
LH	pulling	0.3	64
LH	pulling	0.303	50
LH	pulling	0.306	60
LH	pulling	0.309	54
LH	pulling	0.312	47
LH	pulling	0.315	49
LH	pulling	0.318	40
LH	pulling	0.321	49
LH	pulling	0.324	38
LH	pulling	0.327	47
LH	pulling	0.33	32
LH	pulling	0.333	47
LH	pulling	0.336	37
LH	pulling	0.339	42
LH	pulling	0.342	41
LH	pulling	0.345	29
LH	pulling	0.348	36
LH	pulling	0.351	31
LH	pulling	0.354	30
LH	pulling	0.357	33
LH	pulling	0.36	26
LH	pulling	0.363	16
LH	pulling	0.366	20
LH	pulling	0.369	20
LH	pulling	0.372	19
LH	pulling	0.375	21
LH	pulling	0.378	16
LH	pulling	0.381	13
LH	pulling	0.384	21
LH	pulling	0.387	11
LH	pulling	0.39	12
LH	pulling	0.393	7
LH	pulling	0.396	13
LH	pulling	0.399	12
LH	pulling	0.402	8
LH	pulling	0.405	10
LH	pulling	0.408	4
LH	pulling	0.411	2
LH	pulling	0.414	6
LH	pulling	0.417	7
LH	pulling	0.42	8
LH	pulling	0.423	9
LH	pulling	0.426	8
LH	pulling	0.429	7
LH	pulling	0.432	6
LH	pulling	0.435	5
LH	pulling	0.438	6
LH	pulling	0.441	2
LH	pulling	0.444	2
LH	pulling	0.447	3
LH	pulling	0.45	4
LH	pulling	0.453	2
LH	pulling	0.456	5
LH	pulling	0.459	2
LH	pulling	0.462	5
LH	pulling	0.465	2
LH	pulling	0.468	1
LH	pulling	0.471	4
LH	pulling	0.474	2
LH	pulling	0.477	2
LH	pulling	0.48	1
LH	pulling	0.483	2
LH	pulling	0.486	1
LH	pulling	0.489	3
LH	pulling	0.492	0
LH	pulling	0.495	0
LH	pulling	0.498	1
LH	pulling	0.501	1
LH	pulling	0.504	1
LH	pulling	0.507	3
LH	pulling	0.51	0
LH	pulling	0.513	1
LH	pulling	0.516	0
LH	pulling	0.519	0
LH	pulling	0.522	0
LH	pulling	0.525	0
LH	pulling	0.528	0
LH	pulling	0.531	0
LH	pulling	0.534	0
LH	pulling	0.537	0
LH	pulling	0.54	0
LH	pulling	0.543	0
LH	pulling	0.546	0
LH	pulling	0.549	0
LH	pulling	0.552	0
LH	pulling	0.555	0
LH	pulling	0.558	0
LH	pulling	0.561	0
LH	pulling	0.564	0
LH	pulling	0.567	0
LH	pulling	0.57	0
LH	pulling	0.573	0
LH	pulling	0.576	0
LH	pulling	0.579	0
LH	pulling	0.582	0
LH	pulling	0.585	0
LH	pulling	0.588	0
LH	pulling	0.591	0
LH	pulling	0.594	0
LH	pulling	0.597	0
LH	pulling	0.6	0
LH	pulling	0.603	0
LH	pulling	0.606	0
LH	pulling	0.609	0
LH	pulling	0.612	0
LH	pulling	0.615	0
LH	pulling	0.618	0
LH	pulling	0.621	0
LH	pulling	0.624	0
LH	pulling	0.627	0
LH	pulling	0.63	0
LH	pulling	0.633	0
LH	pulling	0.636	0
LH	pulling	0.639	0
LH	pulling	0.642	0
LH	pulling	0.645	0
LH	pulling	0.648	0
LH	pulling	0.651	0
LH	pulling	0.654	0
LH	pulling	0.657	0
LH	pulling	0.66	0
LH	pulling	0.663	0
LH	pulling	0.666	0
LH	pulling	0.669	0
LH	pulling	0.672	0
LH	pulling	0.675	0
LH	pulling	0.678	0
LH	pulling	0.681	0
LH	pulling	0.684	0
LH	pulling	0.687	0
LH	pulling	0.69	0
LH	pulling	0.693	0
LH	pulling	0.696	0
LH	pulling	0.699	0
LH	pulling	0.702	0
LH	pulling	0.705	0
LH	pulling	0.708	0
LH	pulling	0.711	0
LH	pulling	0.714	0
LH	pulling	0.717	0
LH	pulling	0.72	0
LH	pulling	0.723	0
LH	pulling	0.726	0
LH	pulling	0.729	0
LH	pulling	0.732	0
LH	pulling	0.735	0
LH	pulling	0.738	0
LH	pulling	0.741	0
LH	pulling	0.744	0
LH	pulling	0.747	0
LH	pulling	0.75	0
LH	pulling	0.753	0
LH	pulling	0.756	0
LH	pulling	0.759	0
LH	pulling	0.762	0
LH	pulling	0.765	0
LH	pulling	0.768	0
LH	pulling	0.771	0
LH	pulling	0.774	0
LH	pulling	0.777	0
LH	pulling	0.78	0
LH	pulling	0.783	0
LH	pulling	0.786	0
LH	pulling	0.789	0
LH	pulling	0.792	0
LH	pulling	0.795	0
LH	pulling	0.798	0
LH	pulling	0.801	0
LH	pulling	0.804	0
LH	pulling	0.807	0
LH	pulling	0.81	0
LH	pulling	0.813	0
LH	pulling	0.816	0
LH	pulling	0.819	0
LH	pulling	0.822	0
LH	pulling	0.825	0
LH	pulling	0.828	0
LH	pulling	0.831	0
LH	pulling	0.834	0
LH	pulling	0.837	0
LH	pulling	0.84	0
LH	pulling	0.843	0
LH	pulling	0.846	0
LH	pulling	0.849	0
LH	pulling	0.852	0
LH	pulling	0.855	0
LH	pulling	0.858	0
LH	pulling	0.861	0
LH	pulling	0.864	0
LH	pulling	0.867	0
LH	pulling	0.87	0
LH	pulling	0.873	0
LH	pulling	0.876	0
LH	pulling	0.879	0
LH	pulling	0.882	0
LH	pulling	0.885	0
LH	pulling	0.888	0
LH	pulling	0.891	0
LH	pulling	0.894	0
LH	pulling	0.897	0
LH	pulling	0.9	0
LH	pulling	0.903	0
LH	pulling	0.906	0
LH	pulling	0.909	0
LH	pulling	0.912	0
LH	pulling	0.915	0
LH	pulling	0.918	0
LH	pulling	0.921	0
LH	pulling	0.924	0
LH	pulling	0.927	0
LH	pulling	0.93	0
LH	pulling	0.933	0
LH	pulling	0.936	0
LH	pulling	0.939	0
LH	pulling	0.942	0
LH	pulling	0.945	0
LH	pulling	0.948	0
LH	pulling	0.951	0
LH	pulling	0.954	0
LH	pulling	0.957	0
LH	pulling	0.96	0
LH	pulling	0.963	0
LH	pulling	0.966	0
LH	pulling	0.969	0
LH	pulling	0.972	0
LH	pulling	0.975	0
LH	pulling	0.978	0
LH	pulling	0.981	0
LH	pulling	0.984	0
LH	pulling	0.987	0
LH	pulling	0.99	0
LH	pulling	0.993	0
LH	pulling	0.996	0
LH	pulling	0.999	0
LH	pulling	1.002	0
LH	pulling	1.005	0
LH	pulling	1.008	0
LH	pulling	1.011	0
LH	pulling	1.014	0
LH	pulling	1.017	0
LH	pulling	1.02	0
LH	pulling	1.023	0
LH	pulling	1.026	0
LH	pulling	1.029	0
LH	pulling	1.032	0
LH	pulling	1.035	0
LH	pulling	1.038	0
LH	pulling	1.041	0
LH	pulling	1.044	0
LH	pulling	1.047	0
LH	pulling	1.05	0
LH	pulling	1.053	0
LH	pulling	1.056	0
LH	pulling	1.059	0
LH	pulling	1.062	0
LH	pulling	1.065	0
LH	pulling	1.068	0
LH	pulling	1.071	0
LH	pulling	1.074	0
LH	pulling	1.077	0
LH	pulling	1.08	0
LH	pulling	1.083	0
LH	pulling	1.086	0
LH	pulling	1.089	0
LH	pulling	1.092	0
LH	pulling	1.095	0
LH	pulling	1.098	0
LH	pulling	1.101	0
LH	pulling	1.104	0
LH	pulling	1.107	0
LH	pulling	1.11	0
LH	pulling	1.113	0
LH	pulling	1.116	0
LH	pulling	1.119	0
LH	pulling	1.122	0
LH	pulling	1.125	0
LH	pulling	1.128	0
LH	pulling	1.131	0
LH	pulling	1.134	0
LH	pulling	1.137	0
LH	pulling	1.14	0
LH	pulling	1.143	0
LH	pulling	1.146	0
LH	pulling	1.149	0
LH	pulling	1.152	0
LH	pulling	1.155	0
LH	pulling	1.158	0
LH	pulling	1.161	0
LH	pulling	1.164	0
LH	pulling	1.167	0
LH	pulling	1.17	0
LH	pulling	1.173	0
LH	pulling	1.176	0
LH	pulling	1.179	0
LH	pulling	1.182	0
LH	pulling	1.185	0
LH	pulling	1.188	0
LH	pulling	1.191	0
LH	pulling	1.194	0
LH	pulling	1.197	0
LH	pulling	1.2	0
LH	pulling	1.203	0
LH	pulling	1.206	0
LH	pulling	1.209	0
LH	pulling	1.212	0
LH	pulling	1.215	0
LH	pulling	1.218	0
LH	pulling	1.221	0
LH	pulling	1.224	0
LH	pulling	1.227	0
LH	pulling	1.23	0
LH	pulling	1.233	0
LH	pulling	1.236	0
LH	pulling	1.239	0
LH	pulling	1.242	0
LH	pulling	1.245	0
LH	pulling	1.248	0
LH	pulling	1.251	0
LH	pulling	1.254	0
LH	pulling	1.257	0
LH	pulling	1.26	0
LH	pulling	1.263	0
LH	pulling	1.266	0
LH	pulling	1.269	0
LH	pulling	1.272	0
LH	pulling	1.275	0
LH	pulling	1.278	0
LH	pulling	1.281	0
LH	pulling	1.284	0
LH	pulling	1.287	0
LH	pulling	1.29	0
LH	pulling	1.293	0
LH	pulling	1.296	0
LH	pulling	1.299	0
LH	pulling	1.302	0
LH	pulling	1.305	0
LH	pulling	1.308	0
LH	pulling	1.311	0
LH	pulling	1.314	0
LH	pulling	1.317	0
LH	pulling	1.32	0
LH	pulling	1.323	0
LH	pulling	1.326	0
LH	pulling	1.329	0
LH	pulling	1.332	0
LH	pulling	1.335	0
LH	pulling	1.338	0
LH	pulling	1.341	0
LH	pulling	1.344	0
LH	pulling	1.347	0
LH	pulling	1.35	0
LH	pulling	1.353	0
LH	pulling	1.356	0
LH	pulling	1.359	0
LH	pulling	1.362	0
LH	pulling	1.365	0
LH	pulling	1.368	0
LH	pulling	1.371	0
LH	pulling	1.374	0
LH	pulling	1.377	0
LH	pulling	1.38	0
LH	pulling	1.383	0
LH	pulling	1.386	0
LH	pulling	1.389	0
LH	pulling	1.392	0
LH	pulling	1.395	0
LH	pulling	1.398	0
LH	pulling	1.401	0
LH	pulling	1.404	0
LH	pulling	1.407	0
LH	pulling	1.41	0
LH	pulling	1.413	0
LH	pulling	1.416	0
LH	pulling	1.419	0
LH	pulling	1.422	0
LH	pulling	1.425	0
LH	pulling	1.428	0
LH	pulling	1.431	0
LH	pulling	1.434	0
LH	pulling	1.437	0
LH	pulling	1.44	0
LH	pulling	1.443	0
LH	pulling	1.446	0
LH	pulling	1.449	0
LH	pulling	1.452	0
LH	pulling	1.455	0
LH	pulling	1.458	0
LH	pulling	1.461	0
LH	pulling	1.464	0
LH	pulling	1.467	0
LH	pulling	1.47	0
LH	pulling	1.473	0
LH	pulling	1.476	0
LH	pulling	1.479	0
LH	pulling	1.482	0
LH	pulling	1.485	0
LH	pulling	1.488	0
LH	pulling	1.491	0
LH	pulling	1.494	0
LH	pulling	1.497	0
AR	equilibrium	0	0
AR	equilibrium	0.003	0
AR	equilibrium	0.006	0
AR	equilibrium	0.009	0
AR	equilibrium	0.012	0
AR	equilibrium	0.015	0
AR	equilibrium	0.018	0
AR	equilibrium	0.021	0
AR	equilibrium	0.024	0
AR	equilibrium	0.027	0
AR	equilibrium	0.03	3
AR	equilibrium	0.033	0
AR	equilibrium	0.036	0
AR	equilibrium	0.039	0
AR	equilibrium	0.042	0
AR	equilibrium	0.045	0
AR	equilibrium	0.048	0
AR	equilibrium	0.051	0
AR	equilibrium	0.054	0
AR	equilibrium	0.057	0
AR	equilibrium	0.06	0
AR	equilibrium	0.063	0
AR	equilibrium	0.066	0
AR	equilibrium	0.069	0
AR	equilibrium	0.072	1
AR	equilibrium	0.075	2
AR	equilibrium	0.078	2
AR	equilibrium	0.081	1
AR	equilibrium	0.084	3
AR	equilibrium	0.087	1
AR	equilibrium	0.09	7
AR	equilibrium	0.093	9
AR	equilibrium	0.096	20
AR	equilibrium	0.099	28
AR	equilibrium	0.102	53
AR	equilibrium	0.105	76
AR	equilibrium	0.108	103
AR	equilibrium	0.111	134
AR	equilibrium	0.114	173
AR	equilibrium	0.117	216
AR	equilibrium	0.12	256
AR	equilibrium	0.123	323
AR	equilibrium	0.126	382
AR	equilibrium	0.129	481
AR	equilibrium	0.132	494
AR	equilibrium	0.135	650
AR	equilibrium	0.138	679
AR	equilibrium	0.141	831
AR	equilibrium	0.144	897
AR	equilibrium	0.147	987
AR	equilibrium	0.15	1013
AR	equilibrium	0.153	993
AR	equilibrium	0.156	997
AR	equilibrium	0.159	982
AR	equilibrium	0.162	935
AR	equilibrium	0.165	914
AR	equilibrium	0.168	833
AR	equilibrium	0.171	760
AR	equilibrium	0.174	684
AR	equilibrium	0.177	618
AR	equilibrium	0.18	525
AR	equilibrium	0.183	497
AR	equilibrium	0.186	445
AR	equilibrium	0.189	423
AR	equilibrium	0.192	329
AR	equilibrium	0.195	322
AR	equilibrium	0.198	302
AR	equilibrium	0.201	275
AR	equilibrium	0.204	273
AR	equilibrium	0.207	243
AR	equilibrium	0.21	238
AR	equilibrium	0.213	240
AR	equilibrium	0.216	226
AR	equilibrium	0.219	244
AR	equilibrium	0.222	189
AR	equilibrium	0.225	238
AR	equilibrium	0.228	202
AR	equilibrium	0.231	173
AR	equilibrium	0.234	175
AR	equilibrium	0.237	169
AR	equilibrium	0.24	192
AR	equilibrium	0.243	144
AR	equilibrium	0.246	150
AR	equilibrium	0.249	148
AR	equilibrium	0.252	134
AR	equilibrium	0.255	136
AR	equilibrium	0.258	113
AR	equilibrium	0.261	144
AR	equilibrium	0.264	111
AR	equilibrium	0.267	110
AR	equilibrium	0.27	106
AR	equilibrium	0.273	98
AR	equilibrium	0.276	109
AR	equilibrium	0.279	86
AR	equilibrium	0.282	80
AR	equilibrium	0.285	70
AR	equilibrium	0.288	69
AR	equilibrium	0.291	67
AR	equilibrium	0.294	48
AR	equilibrium	0.297	50
AR	equilibrium	0.3	48
AR	equilibrium	0.303	38
AR	equilibrium	0.306	53
AR	equilibrium	0.309	30
AR	equilibrium	0.312	32
AR	equilibrium	0.315	33
AR	equilibrium	0.318	42
AR	equilibrium	0.321	34
AR	equilibrium	0.324	30
AR	equilibrium	0.327	27
AR	equilibrium	0.33	23
AR	equilibrium	0.333	18
AR	equilibrium	0.336	25
AR	equilibrium	0.339	14
AR	equilibrium	0.342	11
AR	equilibrium	0.345	20
AR	equilibrium	0.348	19
AR	equilibrium	0.351	12
AR	equilibrium	0.354	6
AR	equilibrium	0.357	7
AR	equilibrium	0.36	9
AR	equilibrium	0.363	7
AR	equilibrium	0.366	4
AR	equilibrium	0.369	6
AR	equilibrium	0.372	4
AR	equilibrium	0.375	4
AR	equilibrium	0.378	1
AR	equilibrium	0.381	2
AR	equilibrium	0.384	3
AR	equilibrium	0.387	1
AR	equilibrium	0.39	0
AR	equilibrium	0.393	0
AR	equilibrium	0.396	0
AR	equilibrium	0.399	0
AR	equilibrium	0.402	0
AR	equilibrium	0.405	1
AR	equilibrium	0.408	0
AR	equilibrium	0.411	0
AR	equilibrium	0.414	0
AR	equilibrium	0.417	1
AR	equilibrium	0.42	0
AR	equilibrium	0.423	0
AR	equilibrium	0.426	0
AR	equilibrium	0.429	1
AR	equilibrium	0.432	0
AR	equilibrium	0.435	0
AR	equilibrium	0.438	0
AR	equilibrium	0.441	0
AR	equilibrium	0.444	0
AR	equilibrium	0.447	0
AR	equilibrium	0.45	0
AR	equilibrium	0.453	0
AR	equilibrium	0.456	0
AR	equilibrium	0.459	0
AR	equilibrium	0.462	0
AR	equilibrium	0.465	0
AR	equilibrium	0.468	0
AR	equilibrium	0.471	0
AR	equilibrium	0.474	0
AR	equilibrium	0.477	0
AR	equilibrium	0.48	0
AR	equilibrium	0.483	0
AR	equilibrium	0.486	0
AR	equilibrium	0.489	0
AR	equilibrium	0.492	0
AR	equilibrium	0.495	0
AR	equilibrium	0.498	0
AR	equilibrium	0.501	0
AR	equilibrium	0.504	0
AR	equilibrium	0.507	0
AR	equilibrium	0.51	0
AR	equilibrium	0.513	0
AR	equilibrium	0.516	0
AR	equilibrium	0.519	0
AR	equilibrium	0.522	0
AR	equilibrium	0.525	0
AR	equilibrium	0.528	0
AR	equilibrium	0.531	0
AR	equilibrium	0.534	0
AR	equilibrium	0.537	0
AR	equilibrium	0.54	0
AR	equilibrium	0.543	0
AR	equilibrium	0.546	0
AR	equilibrium	0.549	0
AR	equilibrium	0.552	0
AR	equilibrium	0.555	0
AR	equilibrium	0.558	0
AR	equilibrium	0.561	0
AR	equilibrium	0.564	0
AR	equilibrium	0.567	0
AR	equilibrium	0.57	0
AR	equilibrium	0.573	0
AR	equilibrium	0.576	0
AR	equilibrium	0.579	0
AR	equilibrium	0.582	0
AR	equilibrium	0.585	0
AR	equilibrium	0.588	0
AR	equilibrium	0.591	0
AR	equilibrium	0.594	0
AR	equilibrium	0.597	0
AR	equilibrium	0.6	0
AR	equilibrium	0.603	0
AR	equilibrium	0.606	0
AR	equilibrium	0.609	0
AR	equilibrium	0.612	0
AR	equilibrium	0.615	0
AR	equilibrium	0.618	0
AR	equilibrium	0.621	0
AR	equilibrium	0.624	0
AR	equilibrium	0.627	0
AR	equilibrium	0.63	0
AR	equilibrium	0.633	0
AR	equilibrium	0.636	0
AR	equilibrium	0.639	0
AR	equilibrium	0.642	0
AR	equilibrium	0.645	0
AR	equilibrium	0.648	0
AR	equilibrium	0.651	0
AR	equilibrium	0.654	0
AR	equilibrium	0.657	0
AR	equilibrium	0.66	0
AR	equilibrium	0.663	0
AR	equilibrium	0.666	0
AR	equilibrium	0.669	0
AR	equilibrium	0.672	0
AR	equilibrium	0.675	0
AR	equilibrium	0.678	0
AR	equilibrium	0.681	0
AR	equilibrium	0.684	0
AR	equilibrium	0.687	0
AR	equilibrium	0.69	0
AR	equilibrium	0.693	0
AR	equilibrium	0.696	0
AR	equilibrium	0.699	0
AR	equilibrium	0.702	0
AR	equilibrium	0.705	0
AR	equilibrium	0.708	0
AR	equilibrium	0.711	0
AR	equilibrium	0.714	0
AR	equilibrium	0.717	0
AR	equilibrium	0.72	0
AR	equilibrium	0.723	0
AR	equilibrium	0.726	0
AR	equilibrium	0.729	0
AR	equilibrium	0.732	0
AR	equilibrium	0.735	0
AR	equilibrium	0.738	0
AR	equilibrium	0.741	0
AR	equilibrium	0.744	0
AR	equilibrium	0.747	0
AR	equilibrium	0.75	0
AR	equilibrium	0.753	0
AR	equilibrium	0.756	0
AR	equilibrium	0.759	0
AR	equilibrium	0.762	0
AR	equilibrium	0.765	0
AR	equilibrium	0.768	0
AR	equilibrium	0.771	0
AR	equilibrium	0.774	0
AR	equilibrium	0.777	0
AR	equilibrium	0.78	0
AR	equilibrium	0.783	0
AR	equilibrium	0.786	0
AR	equilibrium	0.789	0
AR	equilibrium	0.792	0
AR	equilibrium	0.795	0
AR	equilibrium	0.798	0
AR	equilibrium	0.801	0
AR	equilibrium	0.804	0
AR	equilibrium	0.807	0
AR	equilibrium	0.81	0
AR	equilibrium	0.813	0
AR	equilibrium	0.816	0
AR	equilibrium	0.819	0
AR	equilibrium	0.822	0
AR	equilibrium	0.825	0
AR	equilibrium	0.828	0
AR	equilibrium	0.831	0
AR	equilibrium	0.834	0
AR	equilibrium	0.837	0
AR	equilibrium	0.84	0
AR	equilibrium	0.843	0
AR	equilibrium	0.846	0
AR	equilibrium	0.849	0
AR	equilibrium	0.852	0
AR	equilibrium	0.855	0
AR	equilibrium	0.858	0
AR	equilibrium	0.861	0
AR	equilibrium	0.864	0
AR	equilibrium	0.867	0
AR	equilibrium	0.87	0
AR	equilibrium	0.873	0
AR	equilibrium	0.876	0
AR	equilibrium	0.879	0
AR	equilibrium	0.882	0
AR	equilibrium	0.885	0
AR	equilibrium	0.888	0
AR	equilibrium	0.891	0
AR	equilibrium	0.894	0
AR	equilibrium	0.897	0
AR	equilibrium	0.9	0
AR	equilibrium	0.903	0
AR	equilibrium	0.906	0
AR	equilibrium	0.909	0
AR	equilibrium	0.912	0
AR	equilibrium	0.915	0
AR	equilibrium	0.918	0
AR	equilibrium	0.921	0
AR	equilibrium	0.924	0
AR	equilibrium	0.927	0
AR	equilibrium	0.93	0
AR	equilibrium	0.933	0
AR	equilibrium	0.936	0
AR	equilibrium	0.939	0
AR	equilibrium	0.942	0
AR	equilibrium	0.945	0
AR	equilibrium	0.948	0
AR	equilibrium	0.951	0
AR	equilibrium	0.954	0
AR	equilibrium	0.957	0
AR	equilibrium	0.96	0
AR	equilibrium	0.963	0
AR	equilibrium	0.966	0
AR	equilibrium	0.969	0
AR	equilibrium	0.972	0
AR	equilibrium	0.975	0
AR	equilibrium	0.978	0
AR	equilibrium	0.981	0
AR	equilibrium	0.984	0
AR	equilibrium	0.987	0
AR	equilibrium	0.99	0
AR	equilibrium	0.993	0
AR	equilibrium	0.996	0
AR	equilibrium	0.999	0
AR	equilibrium	1.002	0
AR	equilibrium	1.005	0
AR	equilibrium	1.008	0
AR	equilibrium	1.011	0
AR	equilibrium	1.014	0
AR	equilibrium	1.017	0
AR	equilibrium	1.02	0
AR	equilibrium	1.023	0
AR	equilibrium	1.026	0
AR	equilibrium	1.029	0
AR	equilibrium	1.032	0
AR	equilibrium	1.035	0
AR	equilibrium	1.038	0
AR	equilibrium	1.041	0
AR	equilibrium	1.044	0
AR	equilibrium	1.047	0
AR	equilibrium	1.05	0
AR	equilibrium	1.053	0
AR	equilibrium	1.056	0
AR	equilibrium	1.059	0
AR	equilibrium	1.062	0
AR	equilibrium	1.065	0
AR	equilibrium	1.068	0
AR	equilibrium	1.071	0
AR	equilibrium	1.074	0
AR	equilibrium	1.077	0
AR	equilibrium	1.08	0
AR	equilibrium	1.083	0
AR	equilibrium	1.086	0
AR	equilibrium	1.089	0
AR	equilibrium	1.092	0
AR	equilibrium	1.095	0
AR	equilibrium	1.098	0
AR	equilibrium	1.101	0
AR	equilibrium	1.104	0
AR	equilibrium	1.107	0
AR	equilibrium	1.11	0
AR	equilibrium	1.113	0
AR	equilibrium	1.116	0
AR	equilibrium	1.119	0
AR	equilibrium	1.122	0
AR	equilibrium	1.125	0
AR	equilibrium	1.128	0
AR	equilibrium	1.131	0
AR	equilibrium	1.134	0
AR	equilibrium	1.137	0
AR	equilibrium	1.14	0
AR	equilibrium	1.143	0
AR	equilibrium	1.146	0
AR	equilibrium	1.149	0
AR	equilibrium	1.152	0
AR	equilibrium	1.155	0
AR	equilibrium	1.158	0
AR	equilibrium	1.161	0
AR	equilibrium	1.164	0
AR	equilibrium	1.167	0
AR	equilibrium	1.17	0
AR	equilibrium	1.173	0
AR	equilibrium	1.176	0
AR	equilibrium	1.179	0
AR	equilibrium	1.182	0
AR	equilibrium	1.185	0
AR	equilibrium	1.188	0
AR	equilibrium	1.191	0
AR	equilibrium	1.194	0
AR	equilibrium	1.197	0
AR	equilibrium	1.2	0
AR	equilibrium	1.203	0
AR	equilibrium	1.206	0
AR	equilibrium	1.209	0
AR	equilibrium	1.212	0
AR	equilibrium	1.215	0
AR	equilibrium	1.218	0
AR	equilibrium	1.221	0
AR	equilibrium	1.224	0
AR	equilibrium	1.227	0
AR	equilibrium	1.23	0
AR	equilibrium	1.233	0
AR	equilibrium	1.236	0
AR	equilibrium	1.239	0
AR	equilibrium	1.242	0
AR	equilibrium	1.245	0
AR	equilibrium	1.248	0
AR	equilibrium	1.251	0
AR	equilibrium	1.254	0
AR	equilibrium	1.257	0
AR	equilibrium	1.26	0
AR	equilibrium	1.263	0
AR	equilibrium	1.266	0
AR	equilibrium	1.269	0
AR	equilibrium	1.272	0
AR	equilibrium	1.275	0
AR	equilibrium	1.278	0
AR	equilibrium	1.281	0
AR	equilibrium	1.284	0
AR	equilibrium	1.287	0
AR	equilibrium	1.29	0
AR	equilibrium	1.293	0
AR	equilibrium	1.296	0
AR	equilibrium	1.299	0
AR	equilibrium	1.302	0
AR	equilibrium	1.305	0
AR	equilibrium	1.308	0
AR	equilibrium	1.311	0
AR	equilibrium	1.314	0
AR	equilibrium	1.317	0
AR	equilibrium	1.32	0
AR	equilibrium	1.323	0
AR	equilibrium	1.326	0
AR	equilibrium	1.329	0
AR	equilibrium	1.332	0
AR	equilibrium	1.335	0
AR	equilibrium	1.338	0
AR	equilibrium	1.341	0
AR	equilibrium	1.344	0
AR	equilibrium	1.347	0
AR	equilibrium	1.35	0
AR	equilibrium	1.353	0
AR	equilibrium	1.356	0
AR	equilibrium	1.359	0
AR	equilibrium	1.362	0
AR	equilibrium	1.365	0
AR	equilibrium	1.368	0
AR	equilibrium	1.371	0
AR	equilibrium	1.374	0
AR	equilibrium	1.377	0
AR	equilibrium	1.38	0
AR	equilibrium	1.383	0
AR	equilibrium	1.386	0
AR	equilibrium	1.389	0
AR	equilibrium	1.392	0
AR	equilibrium	1.395	0
AR	equilibrium	1.398	0
AR	equilibrium	1.401	0
AR	equilibrium	1.404	0
AR	equilibrium	1.407	0
AR	equilibrium	1.41	0
AR	equilibrium	1.413	0
AR	equilibrium	1.416	0
AR	equilibrium	1.419	0
AR	equilibrium	1.422	0
AR	equilibrium	1.425	0
AR	equilibrium	1.428	0
AR	equilibrium	1.431	0
AR	equilibrium	1.434	0
AR	equilibrium	1.437	0
AR	equilibrium	1.44	0
AR	equilibrium	1.443	0
AR	equilibrium	1.446	0
AR	equilibrium	1.449	0
AR	equilibrium	1.452	0
AR	equilibrium	1.455	0
AR	equilibrium	1.458	0
AR	equilibrium	1.461	0
AR	equilibrium	1.464	0
AR	equilibrium	1.467	0
AR	equilibrium	1.47	0
AR	equilibrium	1.473	0
AR	equilibrium	1.476	0
AR	equilibrium	1.479	0
AR	equilibrium	1.482	0
AR	equilibrium	1.485	0
AR	equilibrium	1.488	0
AR	equilibrium	1.491	0
AR	equilibrium	1.494	0
[truncated: 1,001 more rows]

## Sheet: Fig_4_c
PC	percentage
1	59.7396
2	16.4929
3	11.3985
4	7.69536
5	8.12493
6	7.17385
7	7.60341
8	6.19123
9	6.16233
10	6.13212
11	6.10191
12	6.07038
13	6.04148
14	6.00995
15	5.98105

## Sheet: Fig_4_g
bins	Protein_PC1	Protein_PC1	Protein_PC1	Protein_PC1	Protein_PC1	Protein_PC1	Protein_PC1	Protein_PC1	Protein_PC1	Protein_PC1	Protein_PC1	Protein_PC1	Protein_PC1	Protein_PC1	Protein_PC1	Protein_PC1	Protein_PC1	Protein_PC1	Protein_PC1	Protein_PC1	Protein_PC1	Protein_PC1	Protein_PC1	Protein_PC1	Protein_PC1	Protein_PC1	Protein_PC1	Protein_PC1	Protein_PC1	Protein_PC1	Protein_PC1	Protein_PC1	Protein_PC1	Protein_PC1	Protein_PC1	Protein_PC1	Protein_PC1	Protein_PC1	Protein_PC1	Protein_PC1	Protein_PC1	Protein_PC1	Protein_PC1	Protein_PC1	Protein_PC1	Protein_PC1	Protein_PC1	Protein_PC1	Protein_PC1
LH_PC1	-30	-30	-28.8	-27.6	-26.4	-25.2	-24	-22.8	-21.6	-20.4	-19.2	-18	-16.8	-15.6	-14.4	-13.2	-12	-10.8	-9.6	-8.4	-7.2	-6	-4.8	-3.6	-2.4	-1.2	0	1.2	2.4	3.6	4.8	6	7.2	8.4	9.6	10.8	12	13.2	14.4	15.6	16.8	18	19.2	20.4	21.6	22.8	24	25.2	26.4
LH_PC1	-4	0	0	0	0	0	0	0	0	0	0	0	0	0	0	0	0	0	0	0	0	0	0	0	0	0	0	0	0	0	0	0	0	0	0	0	0	1.389e-05	4.167e-05	0	1.389e-05	1.389e-05	1.389e-05	0	0	0	0	0	0
LH_PC1	-3.84	0	0	0	0	0	0	0	0	0	0	0	0	0	0	0	0	0	0	0	0	0	0	0	0	0	0	0	0	0	0	0	0	0	1.389e-05	0	0	2.778e-05	4.167e-05	8.333e-05	6.944e-05	4.167e-05	2.778e-05	0	2.778e-05	0	1.389e-05	0	0
LH_PC1	-3.68	0	0	0	0	0	0	0	0	0	0	0	0	0	0	0	0	0	0	0	0	0	0	0	0	0	0	0	0	0	0	0	0	1.389e-05	0	0	0	0	5.555e-05	9.722e-05	0.000125	9.722e-05	0.00011111	6.944e-05	4.167e-05	1.389e-05	4.167e-05	0	5.555e-05
LH_PC1	-3.52	0	0	0	0	0	0	0	0	0	0	0	0	0	0	0	0	0	0	0	0	0	0	0	0	0	0	0	0	0	0	0	1.389e-05	0	0	2.778e-05	4.167e-05	0.00011111	5.555e-05	5.555e-05	0.00020833	9.722e-05	8.333e-05	6.944e-05	4.167e-05	2.778e-05	6.944e-05	0.00011111	6.944e-05
LH_PC1	-3.36	0	0	0	0	0	0	0	0	0	0	0	0	0	0	0	0	0	0	0	0	0	0	0	0	0	0	0	0	0	0	0	0	0	0	5.555e-05	8.333e-05	0.00011111	0.00022222	0.00019444	0.00025	0.00020833	0.00023611	0.00018055	8.333e-05	8.333e-05	0.000125	0.00011111	0.00020833
LH_PC1	-3.2	0	0	0	0	0	0	0	0	0	0	0	0	0	0	0	0	0	0	0	0	0	0	0	0	0	0	0	0	2.778e-05	1.389e-05	0	2.778e-05	5.555e-05	4.167e-05	0.000125	0.00016666	0.00015278	0.00027777	0.00033333	0.00023611	0.00019444	0.00016666	0.00029166	0.00019444	0.00023611	0.00015278	0.00022222	0.00033333
LH_PC1	-3.04	0	0	0	0	0	0	0	0	0	0	0	0	0	0	0	0	0	0	0	0	0	0	0	0	0	0	0	0	4.167e-05	2.778e-05	0	5.555e-05	8.333e-05	4.167e-05	0.000125	0.00036111	0.00022222	0.00025	0.00026389	0.00036111	0.00033333	0.00043055	0.00029166	0.00027777	0.00044444	0.00030555	0.00038888	0.00043055
LH_PC1	-2.88	0	0	0	0	0	0	0	0	0	0	0	0	0	0	0	0	0	0	0	0	0	0	0	0	0	2.778e-05	2.778e-05	1.389e-05	2.778e-05	4.167e-05	8.333e-05	8.333e-05	0.00015278	0.000125	0.00023611	0.00034722	0.00041666	0.00043055	0.00037499	0.00030555	0.00040277	0.00054166	0.00037499	0.00034722	0.00034722	0.00044444	0.00065277	0.00051388
LH_PC1	-2.72	0	0	0	0	0	0	0	0	0	0	0	0	0	0	0	0	0	0	0	0	0	2.778e-05	8.333e-05	2.778e-05	2.778e-05	0	5.555e-05	2.778e-05	8.333e-05	5.555e-05	0.00011111	2.778e-05	0.00019444	0.00015278	0.00033333	0.00033333	0.00030555	0.00059721	0.00025	0.00058333	0.00051388	0.00052777	0.00069443	0.00072221	0.00066666	0.00054166	0.00062499	0.00049999
LH_PC1	-2.56	0	0	0	0	0	0	0	0	0	0	0	0	0	0	0	0	0	1.389e-05	0	1.389e-05	1.389e-05	5.555e-05	0.000125	0.000125	0.00011111	5.555e-05	9.722e-05	0.00015278	8.333e-05	6.944e-05	0.00015278	0.00013889	0.00013889	0.00037499	0.00043055	0.00036111	0.00051388	0.00056944	0.00074999	0.00068055	0.00055555	0.00044444	0.00080554	0.00072221	0.00080554	0.0006111	0.00058333	0.00036111
LH_PC1	-2.4	0	0	0	0	0	0	0	0	0	0	0	0	0	0	1.389e-05	0	0	1.389e-05	0	9.722e-05	9.722e-05	9.722e-05	8.333e-05	0.00018055	0.00016666	0.00022222	6.944e-05	0.00022222	0.00023611	0.00023611	0.00026389	0.00043055	0.0004861	0.00040277	0.00052777	0.0004861	0.00056944	0.00063888	0.00068055	0.00066666	0.00058333	0.00076388	0.00109721	0.00093054	0.00076388	0.00059721	0.00058333	0.00072221
LH_PC1	-2.24	0	0	0	0	0	0	0	0	0	0	0	1.389e-05	2.778e-05	1.389e-05	0	0	1.389e-05	1.389e-05	2.778e-05	8.333e-05	9.722e-05	0.00019444	0.00019444	0.00030555	0.00030555	0.00016666	0.00029166	0.00027777	0.00038888	0.00049999	0.00049999	0.00059721	0.00074999	0.00063888	0.00052777	0.00072221	0.00056944	0.00084721	0.0007361	0.00068055	0.00063888	0.0008611	0.00074999	0.00088888	0.00054166	0.00052777	0.00043055	0.00036111
LH_PC1	-2.08	0	0	0	0	0	0	0	0	0	0	0	0	1.389e-05	1.389e-05	0	1.389e-05	6.944e-05	0	0.00013889	0.00015278	0.00015278	0.00018055	0.00026389	0.00041666	0.00031944	0.00033333	0.00043055	0.00047222	0.00049999	0.00079166	0.00093054	0.00079166	0.00095832	0.00101387	0.00079166	0.00059721	0.00070832	0.00065277	0.00077777	0.00068055	0.00080554	0.00091665	0.00099999	0.00076388	0.00051388	0.00037499	0.00049999	0.00033333
LH_PC1	-1.92	0	0	0	0	0	0	0	0	0	0	0	1.389e-05	1.389e-05	1.389e-05	5.555e-05	5.555e-05	1.389e-05	9.722e-05	0.00018055	0.00018055	0.00026389	0.00056944	0.00052777	0.0006111	0.0006111	0.00047222	0.0007361	0.00069443	0.00093054	0.00109721	0.00124998	0.00126387	0.00126387	0.00097221	0.00099999	0.0006111	0.0008611	0.00068055	0.00087499	0.00080554	0.00091665	0.00068055	0.00058333	0.00051388	0.00034722	0.00030555	0.00038888	0.00019444
LH_PC1	-1.76	0	0	0	0	0	0	0	0	0	0	0	0	1.389e-05	2.778e-05	5.555e-05	8.333e-05	8.333e-05	0.000125	0.00023611	0.00022222	0.00040277	0.00059721	0.00072221	0.00076388	0.00097221	0.00095832	0.00097221	0.00131943	0.0013472	0.00161109	0.00162498	0.00173609	0.00183331	0.00131943	0.00106943	0.00093054	0.00088888	0.0007361	0.00049999	0.00056944	0.0007361	0.00068055	0.00052777	0.00051388	0.00033333	0.00029166	0.00022222	9.722e-05
LH_PC1	-1.6	0	0	0	0	0	0	0	0	1.389e-05	1.389e-05	2.778e-05	1.389e-05	0	6.944e-05	8.333e-05	0.000125	0.000125	0.00027777	0.00027777	0.00054166	0.00052777	0.00070832	0.00083332	0.00097221	0.00113887	0.00127776	0.00145831	0.00180553	0.00216664	0.00183331	0.00212497	0.00186109	0.00176386	0.00129165	0.00115276	0.00097221	0.00088888	0.00090277	0.00083332	0.00068055	0.00074999	0.0006111	0.00040277	0.00041666	0.00037499	0.00029166	0.00037499	9.722e-05
LH_PC1	-1.44	0	0	0	0	0	0	0	0	0	1.389e-05	0	0	1.389e-05	5.555e-05	4.167e-05	0.000125	0.00016666	0.00025	0.0004861	0.00066666	0.00087499	0.00087499	0.00106943	0.00101387	0.00149998	0.00186109	0.00212497	0.0023333	0.00191664	0.00241663	0.00213886	0.00209719	0.00187497	0.00145831	0.00113887	0.00087499	0.0008611	0.00112498	0.00068055	0.0006111	0.00051388	0.00052777	0.00038888	0.00031944	0.00043055	0.00026389	0.00016666	2.778e-05
LH_PC1	-1.28	0	0	0	0	0	0	0	0	2.778e-05	0	1.389e-05	0	1.389e-05	2.778e-05	0.00011111	9.722e-05	0.00033333	0.00026389	0.00044444	0.0006111	0.00101387	0.00087499	0.0013472	0.00165275	0.00211108	0.00224997	0.00301385	0.00266663	0.00301385	0.00273607	0.00218053	0.00187497	0.0014722	0.00158331	0.00123609	0.00109721	0.00074999	0.00097221	0.00069443	0.00051388	0.00038888	0.00041666	0.00047222	0.00027777	0.00049999	0.00040277	0.00019444	0.000125
LH_PC1	-1.12	0	0	0	0	0	0	0	0	0	0	1.389e-05	0	2.778e-05	8.333e-05	0.00011111	0.00013889	0.00045833	0.00043055	0.00072221	0.00062499	0.00130554	0.00104165	0.00174998	0.00199997	0.00193053	0.00265274	0.00316662	0.0030694	0.00312496	0.00284718	0.00230552	0.00243052	0.00202775	0.00169442	0.00144442	0.00108332	0.00076388	0.00074999	0.00059721	0.00041666	0.00041666	0.00043055	0.00038888	0.00045833	0.00056944	0.00056944	0.00025	0.00015278
LH_PC1	-0.96	0	0	0	0	0	0	0	0	0	0	0	4.167e-05	9.722e-05	0.00013889	5.555e-05	0.00031944	0.00031944	0.00058333	0.00090277	0.00083332	0.00102776	0.00149998	0.00202775	0.00212497	0.00251385	0.00229163	0.00311107	0.00308329	0.00298607	0.00265274	0.00205553	0.00204164	0.00197219	0.0015972	0.00120832	0.00102776	0.00095832	0.00063888	0.00043055	0.00038888	0.00036111	0.00023611	0.00044444	0.00040277	0.00063888	0.00038888	0.00030555	0.00013889
LH_PC1	-0.8	0	0	0	1.389e-05	0	0	0	0	0	0	0	2.778e-05	0.00015278	0.00019444	0.00023611	0.00051388	0.00065277	0.00079166	0.00084721	0.00093054	0.00137498	0.00161109	0.00212497	0.0025833	0.00261107	0.00323607	0.00322218	0.00316662	0.00288885	0.00226386	0.00218053	0.00186109	0.00198608	0.00163887	0.00136109	0.00120832	0.0008611	0.0006111	0.00054166	0.000125	0.00044444	0.00041666	0.00041666	0.00051388	0.00062499	0.00025	0.00020833	9.722e-05
LH_PC1	-0.64	0	0	0	0	0	4.167e-05	1.389e-05	1.389e-05	0	1.389e-05	5.555e-05	1.389e-05	0.00013889	0.00016666	0.00036111	0.00063888	0.00054166	0.00081943	0.00093054	0.00127776	0.00148609	0.00198608	0.00193053	0.00305551	0.00295829	0.00298607	0.00299996	0.00281941	0.00281941	0.0023333	0.00205553	0.00213886	0.00168053	0.00170831	0.00130554	0.00106943	0.00080554	0.00065277	0.00041666	0.00034722	0.00043055	0.00031944	0.00044444	0.00059721	0.00045833	0.00026389	9.722e-05	5.555e-05
LH_PC1	-0.48	1.389e-05	0	1.389e-05	0	1.389e-05	0	0	0	0	5.555e-05	2.778e-05	0.00011111	0.00020833	0.00036111	0.00040277	0.00080554	0.00084721	0.00101387	0.00105554	0.00145831	0.00141665	0.00199997	0.00240274	0.00247219	0.00272218	0.00281941	0.00288885	0.00259719	0.00255552	0.00243052	0.00236108	0.00215275	0.00174998	0.00170831	0.0011111	0.00109721	0.0008611	0.0006111	0.00058333	0.00027777	0.00025	0.00034722	0.00037499	0.00045833	0.00038888	0.00030555	0.000125	2.778e-05
LH_PC1	-0.32	0	1.389e-05	1.389e-05	2.778e-05	1.389e-05	2.778e-05	0	1.389e-05	6.944e-05	0	9.722e-05	0.00015278	0.00033333	0.00038888	0.00074999	0.00079166	0.00091665	0.00083332	0.00120832	0.00129165	0.00168053	0.00188886	0.00215275	0.00227775	0.00281941	0.00259719	0.00286107	0.00263885	0.00254163	0.00247219	0.00219441	0.00198608	0.00137498	0.0013472	0.00118054	0.00101387	0.00087499	0.00070832	0.00074999	0.00044444	0.00030555	0.00031944	0.00034722	0.00026389	0.00020833	9.722e-05	0.000125	1.389e-05
LH_PC1	-0.16	0	0	1.389e-05	4.167e-05	4.167e-05	1.389e-05	0	2.778e-05	4.167e-05	8.333e-05	0.00015278	0.00038888	0.00044444	0.00066666	0.00076388	0.00106943	0.00084721	0.00112498	0.00116665	0.00127776	0.00140276	0.00181942	0.00255552	0.00215275	0.00223608	0.00244441	0.00212497	0.00241663	0.00269441	0.00236108	0.00179164	0.00169442	0.00123609	0.00108332	0.00101387	0.0008611	0.00068055	0.0004861	0.00058333	0.00040277	0.00036111	0.00022222	0.00034722	0.00025	0.00025	9.722e-05	9.722e-05	1.389e-05
LH_PC1	0	1.389e-05	1.389e-05	2.778e-05	2.778e-05	2.778e-05	1.389e-05	0.000125	0.000125	5.555e-05	0.00018055	0.00020833	0.00025	0.00056944	0.00058333	0.00069443	0.00072221	0.0007361	0.00101387	0.00105554	0.00155553	0.00158331	0.00155553	0.00176386	0.00205553	0.00209719	0.00194442	0.00229163	0.00211108	0.00181942	0.00227775	0.00152776	0.00144442	0.0009861	0.0009861	0.00083332	0.00059721	0.00049999	0.00054166	0.00034722	0.00029166	0.00026389	0.00020833	0.00022222	0.00013889	0.00018055	5.555e-05	4.167e-05	1.389e-05
LH_PC1	0.16	0	2.778e-05	2.778e-05	2.778e-05	1.389e-05	5.555e-05	5.555e-05	6.944e-05	8.333e-05	0.00020833	0.00020833	0.00034722	0.00043055	0.00063888	0.00101387	0.00102776	0.0011111	0.00123609	0.00138887	0.00113887	0.00151387	0.00155553	0.00169442	0.00158331	0.00149998	0.00183331	0.00190275	0.00165275	0.00170831	0.00166664	0.00140276	0.00077777	0.00087499	0.00079166	0.00056944	0.00054166	0.00026389	0.00033333	0.00022222	0.00013889	0.00015278	0.00016666	0.00013889	0.00018055	5.555e-05	1.389e-05	0	0
LH_PC1	0.32	2.778e-05	2.778e-05	0.00011111	2.778e-05	8.333e-05	5.555e-05	4.167e-05	0.000125	0.00015278	0.00022222	0.00018055	0.00034722	0.00055555	0.00074999	0.0008611	0.00106943	0.00097221	0.00115276	0.00158331	0.00120832	0.00123609	0.00116665	0.00131943	0.00133331	0.00170831	0.00155553	0.00151387	0.00165275	0.00144442	0.00113887	0.00091665	0.00058333	0.0004861	0.00062499	0.00056944	0.00052777	0.00029166	0.00019444	0.00018055	0.00016666	9.722e-05	6.944e-05	6.944e-05	5.555e-05	0	1.389e-05	0	0
LH_PC1	0.48	1.389e-05	2.778e-05	0.00011111	5.555e-05	8.333e-05	8.333e-05	4.167e-05	9.722e-05	0.00015278	0.00018055	0.00023611	0.00038888	0.00051388	0.00090277	0.00084721	0.00115276	0.00120832	0.00133331	0.00136109	0.00104165	0.00131943	0.00118054	0.0013472	0.00138887	0.00124998	0.00140276	0.00113887	0.00133331	0.00079166	0.00062499	0.00069443	0.00051388	0.00059721	0.0004861	0.00049999	0.00020833	0.00036111	0.00011111	9.722e-05	1.389e-05	4.167e-05	4.167e-05	8.333e-05	1.389e-05	0	1.389e-05	0	0
LH_PC1	0.64	4.167e-05	4.167e-05	4.167e-05	8.333e-05	8.333e-05	1.389e-05	0.00013889	0.00011111	0.00016666	0.000125	0.00023611	0.00045833	0.0004861	0.00095832	0.00106943	0.00122221	0.00123609	0.00137498	0.00126387	0.00136109	0.00108332	0.00141665	0.00126387	0.00109721	0.00095832	0.00093054	0.00074999	0.00088888	0.00065277	0.00045833	0.00037499	0.00044444	0.00030555	0.00026389	0.00025	0.00022222	2.778e-05	8.333e-05	2.778e-05	0	1.389e-05	2.778e-05	0	0	0	0	0	0
LH_PC1	0.8	2.778e-05	4.167e-05	4.167e-05	6.944e-05	6.944e-05	6.944e-05	5.555e-05	0.000125	0.000125	0.00034722	0.00034722	0.00065277	0.00062499	0.0009861	0.00118054	0.00127776	0.0015972	0.00141665	0.00124998	0.00166664	0.00108332	0.00127776	0.00158331	0.00102776	0.00093054	0.00084721	0.0006111	0.00052777	0.00040277	0.00031944	0.00026389	0.00031944	0.00029166	0.00015278	6.944e-05	0.00013889	6.944e-05	2.778e-05	1.389e-05	0	0	0	0	0	0	0	0	0
LH_PC1	0.96	2.778e-05	4.167e-05	6.944e-05	5.555e-05	8.333e-05	0.00013889	2.778e-05	0.00018055	0.00020833	0.00037499	0.00038888	0.00069443	0.00080554	0.00106943	0.00149998	0.00194442	0.00166664	0.0014722	0.0015972	0.00140276	0.00137498	0.00140276	0.00108332	0.0009861	0.00076388	0.00062499	0.00069443	0.00037499	0.00025	0.000125	0.00018055	5.555e-05	0.00016666	0.00011111	5.555e-05	6.944e-05	4.167e-05	2.778e-05	0	0	0	0	0	0	0	0	0	0
LH_PC1	1.12	1.389e-05	1.389e-05	8.333e-05	6.944e-05	4.167e-05	6.944e-05	0.000125	0.000125	0.00025	0.00029166	0.00065277	0.00083332	0.00122221	0.00133331	0.00156942	0.00202775	0.00165275	0.00158331	0.00137498	0.00176386	0.00140276	0.00136109	0.00087499	0.00081943	0.00080554	0.00051388	0.00036111	0.00038888	8.333e-05	0.00013889	5.555e-05	8.333e-05	5.555e-05	4.167e-05	4.167e-05	9.722e-05	8.333e-05	5.555e-05	0	0	0	0	0	0	0	0	0	0
LH_PC1	1.28	5.555e-05	4.167e-05	5.555e-05	2.778e-05	4.167e-05	0.00019444	8.333e-05	0.00033333	0.00043055	0.00065277	0.00065277	0.00108332	0.0011111	0.00169442	0.0017222	0.00224997	0.00168053	0.00148609	0.00131943	0.00127776	0.00113887	0.00118054	0.00088888	0.00065277	0.00044444	0.00049999	0.00036111	0.00015278	0.000125	4.167e-05	2.778e-05	1.389e-05	1.389e-05	2.778e-05	2.778e-05	1.389e-05	4.167e-05	4.167e-05	0	0	0	0	0	0	0	0	0	0
LH_PC1	1.44	2.778e-05	2.778e-05	4.167e-05	5.555e-05	0.00013889	0.00016666	0.00016666	0.00043055	0.00036111	0.00074999	0.00090277	0.00122221	0.0014722	0.00174998	0.00187497	0.00198608	0.00190275	0.00124998	0.00161109	0.00130554	0.00095832	0.00101387	0.00081943	0.00055555	0.00058333	0.00030555	0.00029166	0.00016666	0.000125	5.555e-05	2.778e-05	5.555e-05	0	1.389e-05	2.778e-05	2.778e-05	2.778e-05	0	0	0	0	0	0	0	0	0	0	0
LH_PC1	1.6	4.167e-05	5.555e-05	6.944e-05	5.555e-05	0.00013889	0.00022222	0.00029166	0.00045833	0.00079166	0.00112498	0.00136109	0.00122221	0.00186109	0.00187497	0.00211108	0.00127776	0.00136109	0.00127776	0.00109721	0.00122221	0.00133331	0.00074999	0.00052777	0.00047222	0.0004861	0.00033333	0.00030555	9.722e-05	6.944e-05	2.778e-05	0	0	2.778e-05	0	0	0	0	0	0	0	0	0	0	0	0	0	0	0
LH_PC1	1.76	4.167e-05	2.778e-05	8.333e-05	9.722e-05	0.00018055	0.00025	0.00045833	0.00065277	0.00104165	0.00116665	0.00124998	0.00149998	0.00168053	0.00180553	0.00186109	0.00158331	0.00161109	0.00112498	0.0013472	0.00126387	0.00094443	0.00066666	0.00055555	0.00051388	0.00047222	0.00026389	8.333e-05	0.000125	4.167e-05	1.389e-05	0	0	0	0	0	0	0	0	0	0	0	0	0	0	0	0	0	0
LH_PC1	1.92	6.944e-05	5.555e-05	6.944e-05	0.00013889	0.00026389	0.00040277	0.00069443	0.00079166	0.00083332	0.00079166	0.0011111	0.00143054	0.00156942	0.00151387	0.00140276	0.00133331	0.00145831	0.00126387	0.00124998	0.00124998	0.00106943	0.00059721	0.0007361	0.00058333	0.00034722	0.00025	0.00020833	9.722e-05	4.167e-05	1.389e-05	1.389e-05	0	0	0	0	0	0	0	0	0	0	0	0	0	0	0	0	0
LH_PC1	2.08	8.333e-05	2.778e-05	2.778e-05	0.00016666	0.00030555	0.00052777	0.00044444	0.0007361	0.00084721	0.00120832	0.00118054	0.00104165	0.00131943	0.00118054	0.00105554	0.00108332	0.00141665	0.0013472	0.00130554	0.00120832	0.00115276	0.0008611	0.00052777	0.00023611	0.00020833	0.00015278	6.944e-05	6.944e-05	5.555e-05	2.778e-05	0	0	0	0	0	0	0	0	0	0	0	0	0	0	0	0	0	0
LH_PC1	2.24	6.944e-05	9.722e-05	9.722e-05	0.00019444	0.00038888	0.00045833	0.00047222	0.00095832	0.00081943	0.0009861	0.00091665	0.00102776	0.00104165	0.00119443	0.00095832	0.00112498	0.00112498	0.00136109	0.00119443	0.00084721	0.00105554	0.00079166	0.00051388	0.00019444	0.00018055	8.333e-05	0.000125	2.778e-05	0	0	0	0	0	0	0	0	0	0	0	0	0	0	0	0	0	0	0	0
LH_PC1	2.4	5.555e-05	0.00011111	9.722e-05	0.00023611	0.00037499	0.00037499	0.00041666	0.00056944	0.00072221	0.0008611	0.00079166	0.00097221	0.00072221	0.00101387	0.00104165	0.00108332	0.00118054	0.0013472	0.00105554	0.00115276	0.00077777	0.00059721	0.00043055	0.00019444	0.00011111	6.944e-05	4.167e-05	2.778e-05	0	1.389e-05	1.389e-05	0	0	0	0	0	0	0	0	0	0	0	0	0	0	0	0	0
LH_PC1	2.56	9.722e-05	9.722e-05	0.00016666	0.00015278	0.00030555	0.00030555	0.00041666	0.00043055	0.00058333	0.00093054	0.00059721	0.00069443	0.0007361	0.00084721	0.00084721	0.00129165	0.00115276	0.00115276	0.00099999	0.00104165	0.00068055	0.0004861	0.00029166	0.00015278	0.00011111	4.167e-05	2.778e-05	1.389e-05	0	0	0	0	0	0	0	0	0	0	0	0	0	0	0	0	0	0	0	0
LH_PC1	2.72	0.00011111	0.000125	0.00025	0.00018055	0.00037499	0.00018055	0.00031944	0.00041666	0.00051388	0.00041666	0.00031944	0.0006111	0.00083332	0.00079166	0.00077777	0.00104165	0.00072221	0.00090277	0.0006111	0.0004861	0.00033333	0.00022222	0.00013889	0.00011111	1.389e-05	8.333e-05	1.389e-05	0	0	0	0	0	0	0	0	0	0	0	0	0	0	0	0	0	0	0	0	0
LH_PC1	2.88	0.000125	0.00015278	0.00018055	0.00015278	0.00026389	0.00022222	0.00016666	0.00029166	0.00034722	0.00045833	0.00054166	0.00051388	0.00066666	0.00066666	0.00074999	0.00062499	0.0006111	0.00070832	0.00041666	0.00031944	0.00027777	0.000125	8.333e-05	6.944e-05	5.555e-05	4.167e-05	1.389e-05	0	0	0	0	0	0	0	0	0	0	0	0	0	0	0	0	0	0	0	0	0
LH_PC1	3.04	0.00011111	0.00013889	0.00016666	9.722e-05	0.00011111	0.00020833	0.00019444	0.00019444	0.00023611	0.00027777	0.00043055	0.00040277	0.00054166	0.00065277	0.00049999	0.00049999	0.00041666	0.00034722	0.00030555	0.00023611	0.00011111	0.000125	0.00013889	2.778e-05	2.778e-05	0	0	0	0	0	0	0	0	0	0	0	0	0	0	0	0	0	0	0	0	0	0	0
LH_PC1	3.2	6.944e-05	0.00018055	0.00025	0.00027777	0.000125	0.00016666	0.00011111	0.00013889	0.00016666	0.00018055	0.00020833	0.00015278	0.00036111	0.00036111	0.00030555	0.00026389	0.00013889	0.00023611	0.00029166	0.00018055	0.00013889	0.00011111	1.389e-05	2.778e-05	0	0	0	0	0	0	0	0	0	0	0	0	0	0	0	0	0	0	0	0	0	0	0	0
LH_PC1	3.36	0.00015278	0.00022222	0.00018055	0.00011111	0.00018055	0.00013889	0.00015278	0.000125	0.00025	0.00023611	0.00027777	0.00026389	0.00018055	0.00020833	0.00016666	0.000125	0.00011111	6.944e-05	0.00020833	9.722e-05	8.333e-05	1.389e-05	1.389e-05	0	0	1.389e-05	0	0	0	0	0	0	0	0	0	0	0	0	0	0	0	0	0	0	0	0	0	0
LH_PC1	3.52	6.944e-05	6.944e-05	0.00018055	6.944e-05	0.00011111	0.000125	0.00016666	0.00020833	0.00025	0.00019444	0.00018055	0.00015278	0.00019444	0.00020833	6.944e-05	4.167e-05	4.167e-05	0.00011111	0.000125	1.389e-05	1.389e-05	1.389e-05	0	0	0	0	0	0	0	0	0	0	0	0	0	0	0	0	0	0	0	0	0	0	0	0	0	0
LH_PC1	3.68	0.000125	5.555e-05	9.722e-05	0.00011111	6.944e-05	6.944e-05	0.000125	0.00016666	0.00023611	0.00013889	0.00011111	6.944e-05	0.00015278	6.944e-05	2.778e-05	4.167e-05	6.944e-05	4.167e-05	1.389e-05	0	0	2.778e-05	0	0	0	0	0	0	0	0	0	0	0	0	0	0	0	0	0	0	0	0	0	0	0	0	0	0
LH_PC1	3.84	6.944e-05	6.944e-05	0.00013889	9.722e-05	9.722e-05	8.333e-05	0.000125	0.000125	0.00018055	0.00011111	0.00011111	6.944e-05	5.555e-05	5.555e-05	1.389e-05	0	2.778e-05	2.778e-05	1.389e-05	1.389e-05	0	0	0	0	0	0	0	0	0	0	0	0	0	0	0	0	0	0	0	0	0	0	0	0	0	0	0	0
[truncated: 2 more columns]
