# Supplementary material for: NOMPC ion channel hinge forms a gating spring that initiates mechanosensation
Source: Springer Nature journal article supplement (doi:10.1038/s41593-024-01849-3), 2025-01-06
Supplement: MOESM12 [file 41593_2024_1849_MOESM12_ESM.xlsx]

## Sheet: Suppl_Fig1_b_chan_peak
construct	# Channels from peak current/single channel current
NOMPC::GFP	6
NOMPC::GFP	6
NOMPC::GFP	8
NOMPC::GFP	7
NOMPC::GFP	7
NOMPC::GFP	16
NOMPC::GFP	14
NOMPC::GFP	12
NOMPC::GFP	17
AR+AR-NOMPC::GFP	2
AR+AR-NOMPC::GFP	2
AR+AR-NOMPC::GFP	3
AR+AR-NOMPC::GFP	8
AR+AR-NOMPC::GFP	3
AR+AR-NOMPC::GFP	2
AR+AR-NOMPC::GFP	13
LH+LH-NOMPC::GFP	2
LH+LH-NOMPC::GFP	2
LH+LH-NOMPC::GFP	2
LH+LH-NOMPC::GFP	3
LH+LH-NOMPC::GFP	5
LH+LH-NOMPC::GFP	4
LH+LH-NOMPC::GFP	5
LH+LHcys-NOMPC::GFP	6
LH+LHcys-NOMPC::GFP	5
LH+LHcys-NOMPC::GFP	5
LH+LHcys-NOMPC::GFP	2
LH+LHcys-NOMPC::GFP	3
LH+LHcys-NOMPC::GFP	3
LH+LHcys-NOMPC::GFP	3
LH+LHcys-NOMPC::GFP+MTS6	2
LH+LHcys-NOMPC::GFP+MTS6	2
LH+LHcys-NOMPC::GFP+MTS6	4
LH+LHcys-NOMPC::GFP+MTS6	4
LH+LHcys-NOMPC::GFP+MTS6	2
LH+LHcys-NOMPC::GFP+MTS6	5

## Sheet: Suppl_Fig1_b_peakcurr
construct	peak_current_pA		Group	N	Missing	Mean	Std. Deviation	SE of Mean	Anova	DF	Sum of Squares	Mean Square	F Value	Prob>F	Comparison	Mean Difference	SEM	t Value	Prob	Sig	LCL	UCL
NOMPC::GFP	50		NOMPC::GFP	9	0	82.2222	36.4032	12.1344	Model	4	18162.7	4540.66	7.06949	0.000363274	AR+AR-NOMPC::GFP vs. NOMPC::GFP	-4.85714	1.51768	-3.20037	0.03236	1	-9.45541	-0.25887
NOMPC::GFP	46		AR+AR-NOMPC::GFP	7	0	35.8571	34.1146	12.8941	Error	31	19911	642.29			LH+LH-NOMPC::GFP vs. NOMPC::GFP	-7.14286	1.51768	-4.70643	0.000533099	1	-11.7411	-2.54459
NOMPC::GFP	64		LH+LH-NOMPC::GFP	7	0	26.1429	11.5676	4.37214	Total	35	38073.6				LH+LHcys-NOMPC::GFP vs. NOMPC::GFP	-7.28571	1.51768	-4.80055	0.00040895	1	-11.884	-2.68744
NOMPC::GFP	52		LH+LHcys-NOMPC::GFP	7	0	29.5714	12.6604	4.78518							LH+LHcys-NOMPC::GFP+MTS6 vs. NOMPC::GFP	-6.16667	1.5837	-3.89384	0.00511	1	-10.9649	-1.36838
NOMPC::GFP	52		LH+LHcys-NOMPC::GFP MTS6	6	0	32	10.6019	4.3282							LH+LH-NOMPC::GFP vs. AR+AR-NOMPC::GFP	-2.28571	1.56746	-1.45823	1	0	-7.03479	2.46336
NOMPC::GFP	126														LH+LHcys-NOMPC::GFP vs. AR+AR-NOMPC::GFP	-2.42857	1.56746	-1.54937	1	0	-7.17764	2.3205
NOMPC::GFP	115														LH+LHcys-NOMPC::GFP+MTS6 vs. AR+AR-NOMPC::GFP	-1.30952	1.63146	-0.80267	1	0	-6.25252	3.63347
NOMPC::GFP	100
NOMPC::GFP	135
AR+AR-NOMPC::GFP	14
AR+AR-NOMPC::GFP	19
AR+AR-NOMPC::GFP	20
AR+AR-NOMPC::GFP	60
AR+AR-NOMPC::GFP	21
AR+AR-NOMPC::GFP	13
AR+AR-NOMPC::GFP	104
LH+LH-NOMPC::GFP	18
LH+LH-NOMPC::GFP	16
LH+LH-NOMPC::GFP	14
LH+LH-NOMPC::GFP	21
LH+LH-NOMPC::GFP	41
LH+LH-NOMPC::GFP	33
LH+LH-NOMPC::GFP	40
LH+LHcys-NOMPC::GFP	51
LH+LHcys-NOMPC::GFP	38
LH+LHcys-NOMPC::GFP	36
LH+LHcys-NOMPC::GFP	15
LH+LHcys-NOMPC::GFP	20
LH+LHcys-NOMPC::GFP	21
LH+LHcys-NOMPC::GFP	26
LH+LHcys-NOMPC::GFP+MTS6	22
LH+LHcys-NOMPC::GFP+MTS6	24
LH+LHcys-NOMPC::GFP+MTS6	35
LH+LHcys-NOMPC::GFP+MTS6	38
LH+LHcys-NOMPC::GFP+MTS6	24
LH+LHcys-NOMPC::GFP+MTS6	49

## Sheet: Suppl_Fig1_b_chan
construct	channel_number_from_fit		Group	N	Missing	Mean	Std. Deviation	SE of Mean	Anova	DF	Sum of Squares	Mean Square	F Value	Prob>F	Comparison	Mean Difference	SEM	t Value	Prob	Sig	LCL	UCL
NOMPC::GFP	6		NOMPC::GFP	8	0	95.099	1.80278	0.47726	Model	4	276.767	69.1917	8.04629	0.000156387	AR+AR-NOMPC::GFP vs. NOMPC::GFP	-4.85714	1.51768	-3.20037	0.03236	1	-9.45541	-0.25887
NOMPC::GFP	4		AR+AR-NOMPC::GFP	7	0	4.14286	3.23669	1.22336	Error	30	257.976	8.59921			LH+LH-NOMPC::GFP vs. NOMPC::GFP	-7.14286	1.51768	-4.70643	0.000533099	1	-11.7411	-2.54459
NOMPC::GFP	9		LH+LH-NOMPC::GFP	7	0	1.85714	0.69007	0.26082	Total	34	534.743				LH+LHcys-NOMPC::GFP vs. NOMPC::GFP	-7.28571	1.51768	-4.80055	0.00040895	1	-11.884	-2.68744
NOMPC::GFP	9		LH+LHcys-NOMPC::GFP	7	0	1.71429	0.75593	0.28571							LH+LHcys-NOMPC::GFP+MTS6 vs. NOMPC::GFP	-6.16667	1.5837	-3.89384	0.00511	1	-10.9649	-1.36838
NOMPC::GFP	6		LH+LHcys-NOMPC::GFP MTS6	6	0	2.83333	1.16905	0.47726							LH+LH-NOMPC::GFP vs. AR+AR-NOMPC::GFP	-2.28571	1.56746	-1.45823	1	0	-7.03479	2.46336
NOMPC::GFP	12														LH+LHcys-NOMPC::GFP vs. AR+AR-NOMPC::GFP	-2.42857	1.56746	-1.54937	1	0	-7.17764	2.3205
NOMPC::GFP	20														LH+LHcys-NOMPC::GFP+MTS6 vs. AR+AR-NOMPC::GFP	-1.30952	1.63146	-0.80267	1	0	-6.25252	3.63347
NOMPC::GFP	6
AR+AR-NOMPC::GFP	1
AR+AR-NOMPC::GFP	2
AR+AR-NOMPC::GFP	3
AR+AR-NOMPC::GFP	7
AR+AR-NOMPC::GFP	4
AR+AR-NOMPC::GFP	2
AR+AR-NOMPC::GFP	10
LH+LH-NOMPC::GFP	1
LH+LH-NOMPC::GFP	2
LH+LH-NOMPC::GFP	2
LH+LH-NOMPC::GFP	2
LH+LH-NOMPC::GFP	2
LH+LH-NOMPC::GFP	3
LH+LH-NOMPC::GFP	1
LH+LHcys-NOMPC::GFP	3
LH+LHcys-NOMPC::GFP	2
LH+LHcys-NOMPC::GFP	2
LH+LHcys-NOMPC::GFP	1
LH+LHcys-NOMPC::GFP	2
LH+LHcys-NOMPC::GFP	1
LH+LHcys-NOMPC::GFP	1
LH+LHcys-NOMPC::GFP+MTS6	2
LH+LHcys-NOMPC::GFP+MTS6	2
LH+LHcys-NOMPC::GFP+MTS6	3
LH+LHcys-NOMPC::GFP+MTS6	3
LH+LHcys-NOMPC::GFP+MTS6	2
LH+LHcys-NOMPC::GFP+MTS6	5

## Sheet: Suppl_Fig1_c_offset
construct	offset_pressure_mmHg		Group	N	Missing	Mean	Std. Deviation	SE of Mean	Anova	DF	Sum of Squares	Mean Square	F Value	Prob>F	Comparison	Mean Difference	SEM	t Value	Prob	Sig	LCL	UCL
NOMPC::GFP	-28.8038		NOMPC::GFP	9	0	-24.8342	5.90855	1.96952	Model	3	1584.35	528.118	14.9665	8.80042e-06	AR+AR-NOMPC::GFP vs. NOMPC::GFP	2.82684	3.13079	0.90292	1	0	-6.1425	11.7962
NOMPC::GFP	-34.0014		AR+AR-NOMPC::GFP	6	0	-22.0073	5.34045	2.18023	Error	25	882.164	35.2865			LH+LH-NOMPC::GFP vs. NOMPC::GFP	-11.9008	2.9936	-3.9754	0.00317	1	-20.4771	-3.32443
NOMPC::GFP	-18.0991		LH+LH-NOMPC::GFP	7	0	-36.7349	4.69945	1.77623	Total	28	2466.52				LH+LHCys-NOMPC::GFP vs. NOMPC::GFP	-14.8608	2.9936	-4.96418	0.000245345	1	-23.4371	-6.28446
NOMPC::GFP	-30.7076		LH+LHCys-NOMPC::GFP	7	0	-39.695	7.39104	2.79355							LH+LH-NOMPC::GFP vs. AR+AR-NOMPC::GFP	-14.7276	3.30485	-4.45636	0.000914978	1	-24.1956	-5.25959
NOMPC::GFP	-21.0736														LH+LHCys-NOMPC::GFP vs. AR+AR-NOMPC::GFP	-17.6876	3.30485	-5.35203	9.01824e-05	1	-27.1557	-8.21962
NOMPC::GFP	-25.7458														LH+LHCys-NOMPC::GFP vs. LH+LH-NOMPC::GFP	-2.96003	3.1752	-0.93224	1	0	-12.0566	6.13655
NOMPC::GFP	-26.7411
NOMPC::GFP	-16.269
NOMPC::GFP	-22.0663
AR+AR-NOMPC::GFP	-27.4998
AR+AR-NOMPC::GFP	-28.2668
AR+AR-NOMPC::GFP	-19.538
AR+AR-NOMPC::GFP	-17.0251
AR+AR-NOMPC::GFP	-15.7897
AR+AR-NOMPC::GFP	-23.9246
LH+LH-NOMPC::GFP	-36.5958
LH+LH-NOMPC::GFP	-37.5522
LH+LH-NOMPC::GFP	-34.1299
LH+LH-NOMPC::GFP	-38.951
LH+LH-NOMPC::GFP	-43.0207
LH+LH-NOMPC::GFP	-28.0162
LH+LH-NOMPC::GFP	-38.8789
LH+LHCys-NOMPC::GFP	-47.1011
LH+LHCys-NOMPC::GFP	-29.7999
LH+LHCys-NOMPC::GFP	-33.1921
LH+LHCys-NOMPC::GFP	-36.0155
LH+LHCys-NOMPC::GFP	-47.3305
LH+LHCys-NOMPC::GFP	-47.1217
LH+LHCys-NOMPC::GFP	-37.304

## Sheet: Suppl_Fig1_c_fit
construct	stimulus_pressure_mmHg	normalized_current_fit
NOMPC::GFP	-80	0.99862
NOMPC::GFP	-72.993	0.99684
NOMPC::GFP	-72.8929	0.9968
NOMPC::GFP	-72.7928	0.99676
NOMPC::GFP	-72.6927	0.99672
NOMPC::GFP	-72.5926	0.99668
NOMPC::GFP	-72.4925	0.99664
NOMPC::GFP	-72.3924	0.9966
NOMPC::GFP	-72.2923	0.99656
NOMPC::GFP	-72.1922	0.99652
NOMPC::GFP	-72.0921	0.99648
NOMPC::GFP	-71.992	0.99644
NOMPC::GFP	-71.8919	0.9964
NOMPC::GFP	-71.7918	0.99635
NOMPC::GFP	-71.6917	0.99631
NOMPC::GFP	-71.5916	0.99627
NOMPC::GFP	-71.4915	0.99622
NOMPC::GFP	-71.3914	0.99618
NOMPC::GFP	-71.2913	0.99613
NOMPC::GFP	-71.1912	0.99609
NOMPC::GFP	-71.0911	0.99604
NOMPC::GFP	-70.991	0.99599
NOMPC::GFP	-70.8909	0.99595
NOMPC::GFP	-70.7908	0.9959
NOMPC::GFP	-70.6907	0.99585
NOMPC::GFP	-70.5906	0.9958
NOMPC::GFP	-70.4905	0.99575
NOMPC::GFP	-70.3904	0.9957
NOMPC::GFP	-70.2903	0.99565
NOMPC::GFP	-70.1902	0.9956
NOMPC::GFP	-70.0901	0.99555
NOMPC::GFP	-69.99	0.99549
NOMPC::GFP	-69.8899	0.99544
NOMPC::GFP	-69.7898	0.99538
NOMPC::GFP	-69.6897	0.99533
NOMPC::GFP	-69.5896	0.99527
NOMPC::GFP	-69.4895	0.99522
NOMPC::GFP	-69.3894	0.99516
NOMPC::GFP	-69.2893	0.9951
NOMPC::GFP	-69.1892	0.99505
NOMPC::GFP	-69.0891	0.99499
NOMPC::GFP	-68.989	0.99493
NOMPC::GFP	-68.8889	0.99487
NOMPC::GFP	-68.7888	0.99481
NOMPC::GFP	-68.6887	0.99475
NOMPC::GFP	-68.5886	0.99468
NOMPC::GFP	-68.4885	0.99462
NOMPC::GFP	-68.3884	0.99456
NOMPC::GFP	-68.2883	0.99449
NOMPC::GFP	-68.1882	0.99443
NOMPC::GFP	-68.0881	0.99436
NOMPC::GFP	-67.988	0.99429
NOMPC::GFP	-67.8879	0.99423
NOMPC::GFP	-67.7878	0.99416
NOMPC::GFP	-67.6877	0.99409
NOMPC::GFP	-67.5876	0.99402
NOMPC::GFP	-67.4875	0.99395
NOMPC::GFP	-67.3874	0.99388
NOMPC::GFP	-67.2873	0.9938
NOMPC::GFP	-67.1872	0.99373
NOMPC::GFP	-67.0871	0.99366
NOMPC::GFP	-66.987	0.99358
NOMPC::GFP	-66.8869	0.99351
NOMPC::GFP	-66.7868	0.99343
NOMPC::GFP	-66.6867	0.99335
NOMPC::GFP	-66.5866	0.99327
NOMPC::GFP	-66.4865	0.99319
NOMPC::GFP	-66.3864	0.99311
NOMPC::GFP	-66.2863	0.99303
NOMPC::GFP	-66.1862	0.99295
NOMPC::GFP	-66.0861	0.99287
NOMPC::GFP	-65.986	0.99278
NOMPC::GFP	-65.8859	0.9927
NOMPC::GFP	-65.7858	0.99261
NOMPC::GFP	-65.6857	0.99252
NOMPC::GFP	-65.5856	0.99243
NOMPC::GFP	-65.4855	0.99234
NOMPC::GFP	-65.3854	0.99225
NOMPC::GFP	-65.2853	0.99216
NOMPC::GFP	-65.1852	0.99207
NOMPC::GFP	-65.0851	0.99198
NOMPC::GFP	-64.985	0.99188
NOMPC::GFP	-64.8849	0.99178
NOMPC::GFP	-64.7848	0.99169
NOMPC::GFP	-64.6847	0.99159
NOMPC::GFP	-64.5846	0.99149
NOMPC::GFP	-64.4845	0.99139
NOMPC::GFP	-64.3844	0.99129
NOMPC::GFP	-64.2843	0.99119
NOMPC::GFP	-64.1842	0.99108
NOMPC::GFP	-64.0841	0.99098
NOMPC::GFP	-63.984	0.99087
NOMPC::GFP	-63.8839	0.99076
NOMPC::GFP	-63.7838	0.99065
NOMPC::GFP	-63.6837	0.99054
NOMPC::GFP	-63.5836	0.99043
NOMPC::GFP	-63.4835	0.99032
NOMPC::GFP	-63.3834	0.9902
NOMPC::GFP	-63.2833	0.99009
NOMPC::GFP	-63.1832	0.98997
NOMPC::GFP	-63.0831	0.98985
NOMPC::GFP	-62.983	0.98973
NOMPC::GFP	-62.8829	0.98961
NOMPC::GFP	-62.7828	0.98949
NOMPC::GFP	-62.6827	0.98937
NOMPC::GFP	-62.5826	0.98924
NOMPC::GFP	-62.4825	0.98911
NOMPC::GFP	-62.3824	0.98899
NOMPC::GFP	-62.2823	0.98886
NOMPC::GFP	-62.1822	0.98872
NOMPC::GFP	-62.0821	0.98859
NOMPC::GFP	-61.982	0.98846
NOMPC::GFP	-61.8819	0.98832
NOMPC::GFP	-61.7818	0.98818
NOMPC::GFP	-61.6817	0.98805
NOMPC::GFP	-61.5816	0.9879
NOMPC::GFP	-61.4815	0.98776
NOMPC::GFP	-61.3814	0.98762
NOMPC::GFP	-61.2813	0.98747
NOMPC::GFP	-61.1812	0.98733
NOMPC::GFP	-61.0811	0.98718
NOMPC::GFP	-60.981	0.98703
NOMPC::GFP	-60.8809	0.98687
NOMPC::GFP	-60.7808	0.98672
NOMPC::GFP	-60.6807	0.98656
NOMPC::GFP	-60.5806	0.9864
NOMPC::GFP	-60.4805	0.98625
NOMPC::GFP	-60.3804	0.98608
NOMPC::GFP	-60.2803	0.98592
NOMPC::GFP	-60.1802	0.98575
NOMPC::GFP	-60.0801	0.98559
NOMPC::GFP	-59.98	0.98542
NOMPC::GFP	-59.8799	0.98525
NOMPC::GFP	-59.7798	0.98507
NOMPC::GFP	-59.6797	0.9849
NOMPC::GFP	-59.5796	0.98472
NOMPC::GFP	-59.4795	0.98454
NOMPC::GFP	-59.3794	0.98436
NOMPC::GFP	-59.2793	0.98418
NOMPC::GFP	-59.1792	0.98399
NOMPC::GFP	-59.0791	0.98381
NOMPC::GFP	-58.979	0.98362
NOMPC::GFP	-58.8789	0.98342
NOMPC::GFP	-58.7788	0.98323
NOMPC::GFP	-58.6787	0.98303
NOMPC::GFP	-58.5786	0.98283
NOMPC::GFP	-58.4785	0.98263
NOMPC::GFP	-58.3784	0.98243
NOMPC::GFP	-58.2783	0.98222
NOMPC::GFP	-58.1782	0.98202
NOMPC::GFP	-58.0781	0.98181
NOMPC::GFP	-57.978	0.98159
NOMPC::GFP	-57.8779	0.98138
NOMPC::GFP	-57.7778	0.98116
NOMPC::GFP	-57.6777	0.98094
NOMPC::GFP	-57.5776	0.98072
NOMPC::GFP	-57.4775	0.98049
NOMPC::GFP	-57.3774	0.98027
NOMPC::GFP	-57.2773	0.98003
NOMPC::GFP	-57.1772	0.9798
NOMPC::GFP	-57.0771	0.97957
NOMPC::GFP	-56.977	0.97933
NOMPC::GFP	-56.8769	0.97909
NOMPC::GFP	-56.7792	0.97885
NOMPC::GFP	-56.7768	0.97884
NOMPC::GFP	-56.6767	0.9786
NOMPC::GFP	-56.5766	0.97835
NOMPC::GFP	-56.4765	0.97809
NOMPC::GFP	-56.3764	0.97784
NOMPC::GFP	-56.2763	0.97758
NOMPC::GFP	-56.1762	0.97732
NOMPC::GFP	-56.0761	0.97706
NOMPC::GFP	-55.976	0.97679
NOMPC::GFP	-55.8759	0.97652
NOMPC::GFP	-55.7758	0.97625
NOMPC::GFP	-55.6757	0.97597
NOMPC::GFP	-55.5756	0.97569
NOMPC::GFP	-55.4755	0.97541
NOMPC::GFP	-55.3754	0.97512
NOMPC::GFP	-55.2753	0.97483
NOMPC::GFP	-55.1752	0.97454
NOMPC::GFP	-55.0751	0.97425
NOMPC::GFP	-54.975	0.97395
NOMPC::GFP	-54.8749	0.97365
NOMPC::GFP	-54.7748	0.97334
NOMPC::GFP	-54.6747	0.97303
NOMPC::GFP	-54.5746	0.97272
NOMPC::GFP	-54.4745	0.9724
NOMPC::GFP	-54.3744	0.97208
NOMPC::GFP	-54.2743	0.97176
NOMPC::GFP	-54.1742	0.97143
NOMPC::GFP	-54.0741	0.9711
NOMPC::GFP	-54.0142	0.9709
NOMPC::GFP	-53.974	0.97077
NOMPC::GFP	-53.8739	0.97043
NOMPC::GFP	-53.7738	0.97009
NOMPC::GFP	-53.6737	0.96974
NOMPC::GFP	-53.5736	0.96939
NOMPC::GFP	-53.4735	0.96904
NOMPC::GFP	-53.3734	0.96868
NOMPC::GFP	-53.2733	0.96832
NOMPC::GFP	-53.1732	0.96796
NOMPC::GFP	-53.0731	0.96759
NOMPC::GFP	-52.973	0.96721
NOMPC::GFP	-52.8729	0.96684
NOMPC::GFP	-52.7728	0.96645
NOMPC::GFP	-52.6727	0.96607
NOMPC::GFP	-52.5726	0.96568
NOMPC::GFP	-52.4725	0.96528
NOMPC::GFP	-52.3724	0.96488
NOMPC::GFP	-52.2723	0.96448
NOMPC::GFP	-52.1722	0.96407
NOMPC::GFP	-52.0721	0.96366
NOMPC::GFP	-51.972	0.96324
NOMPC::GFP	-51.8719	0.96282
NOMPC::GFP	-51.7718	0.9624
NOMPC::GFP	-51.6717	0.96197
NOMPC::GFP	-51.5716	0.96153
NOMPC::GFP	-51.4715	0.96109
NOMPC::GFP	-51.3714	0.96064
NOMPC::GFP	-51.2713	0.96019
NOMPC::GFP	-51.2242	0.95998
NOMPC::GFP	-51.1712	0.95974
NOMPC::GFP	-51.0711	0.95928
NOMPC::GFP	-50.971	0.95881
NOMPC::GFP	-50.8709	0.95834
NOMPC::GFP	-50.7708	0.95787
NOMPC::GFP	-50.6707	0.95739
NOMPC::GFP	-50.5706	0.9569
NOMPC::GFP	-50.4705	0.95641
NOMPC::GFP	-50.3704	0.95591
NOMPC::GFP	-50.2703	0.95541
NOMPC::GFP	-50.1702	0.95491
NOMPC::GFP	-50.0701	0.95439
NOMPC::GFP	-49.97	0.95388
NOMPC::GFP	-49.8699	0.95335
NOMPC::GFP	-49.7698	0.95282
NOMPC::GFP	-49.6697	0.95229
NOMPC::GFP	-49.5696	0.95175
NOMPC::GFP	-49.4695	0.9512
NOMPC::GFP	-49.3694	0.95065
NOMPC::GFP	-49.2693	0.95009
NOMPC::GFP	-49.1692	0.94952
NOMPC::GFP	-49.0691	0.94895
NOMPC::GFP	-48.969	0.94838
NOMPC::GFP	-48.8689	0.94779
NOMPC::GFP	-48.7688	0.9472
NOMPC::GFP	-48.6687	0.94661
NOMPC::GFP	-48.5686	0.94601
NOMPC::GFP	-48.4685	0.9454
NOMPC::GFP	-48.3684	0.94478
NOMPC::GFP	-48.2683	0.94416
NOMPC::GFP	-48.1682	0.94354
NOMPC::GFP	-48.1399	0.94336
NOMPC::GFP	-48.0681	0.9429
NOMPC::GFP	-47.968	0.94226
NOMPC::GFP	-47.9485	0.94214
NOMPC::GFP	-47.8679	0.94161
NOMPC::GFP	-47.7678	0.94096
NOMPC::GFP	-47.6677	0.9403
NOMPC::GFP	-47.5676	0.93963
NOMPC::GFP	-47.4675	0.93895
NOMPC::GFP	-47.3674	0.93827
NOMPC::GFP	-47.2673	0.93758
NOMPC::GFP	-47.1672	0.93689
NOMPC::GFP	-47.0671	0.93618
NOMPC::GFP	-46.967	0.93547
NOMPC::GFP	-46.8669	0.93475
NOMPC::GFP	-46.7668	0.93403
NOMPC::GFP	-46.6667	0.93329
NOMPC::GFP	-46.5666	0.93255
NOMPC::GFP	-46.4665	0.9318
NOMPC::GFP	-46.3664	0.93105
NOMPC::GFP	-46.2663	0.93028
NOMPC::GFP	-46.2064	0.92982
NOMPC::GFP	-46.1662	0.92951
NOMPC::GFP	-46.0661	0.92873
NOMPC::GFP	-45.966	0.92794
NOMPC::GFP	-45.8659	0.92715
NOMPC::GFP	-45.7658	0.92634
NOMPC::GFP	-45.6657	0.92553
NOMPC::GFP	-45.5656	0.92471
NOMPC::GFP	-45.4655	0.92388
NOMPC::GFP	-45.3654	0.92305
NOMPC::GFP	-45.2653	0.9222
NOMPC::GFP	-45.1652	0.92135
NOMPC::GFP	-45.0651	0.92049
NOMPC::GFP	-44.965	0.91961
NOMPC::GFP	-44.8649	0.91873
NOMPC::GFP	-44.7648	0.91785
NOMPC::GFP	-44.6647	0.91695
NOMPC::GFP	-44.5646	0.91604
NOMPC::GFP	-44.4645	0.91513
NOMPC::GFP	-44.3644	0.9142
NOMPC::GFP	-44.2643	0.91327
NOMPC::GFP	-44.1665	0.91235
NOMPC::GFP	-44.1642	0.91233
NOMPC::GFP	-44.0641	0.91138
NOMPC::GFP	-44.0135	0.91089
NOMPC::GFP	-43.964	0.91041
NOMPC::GFP	-43.8639	0.90944
NOMPC::GFP	-43.7638	0.90846
NOMPC::GFP	-43.6637	0.90747
NOMPC::GFP	-43.5636	0.90648
NOMPC::GFP	-43.4635	0.90547
NOMPC::GFP	-43.3634	0.90445
NOMPC::GFP	-43.3215	0.90402
NOMPC::GFP	-43.2633	0.90342
NOMPC::GFP	-43.1632	0.90238
NOMPC::GFP	-43.0631	0.90133
NOMPC::GFP	-43.0405	0.9011
NOMPC::GFP	-42.963	0.90028
NOMPC::GFP	-42.8629	0.89921
NOMPC::GFP	-42.7628	0.89813
NOMPC::GFP	-42.6627	0.89704
NOMPC::GFP	-42.5626	0.89594
NOMPC::GFP	-42.4625	0.89483
NOMPC::GFP	-42.3624	0.89371
NOMPC::GFP	-42.2623	0.89258
NOMPC::GFP	-42.1622	0.89144
NOMPC::GFP	-42.0621	0.89029
NOMPC::GFP	-41.962	0.88913
NOMPC::GFP	-41.8619	0.88796
NOMPC::GFP	-41.7618	0.88677
NOMPC::GFP	-41.6617	0.88558
NOMPC::GFP	-41.5616	0.88437
NOMPC::GFP	-41.4615	0.88316
NOMPC::GFP	-41.3614	0.88193
NOMPC::GFP	-41.2613	0.88069
NOMPC::GFP	-41.1612	0.87944
NOMPC::GFP	-41.0611	0.87818
NOMPC::GFP	-40.961	0.87691
NOMPC::GFP	-40.8609	0.87562
NOMPC::GFP	-40.7608	0.87433
NOMPC::GFP	-40.6607	0.87302
NOMPC::GFP	-40.5606	0.8717
NOMPC::GFP	-40.4605	0.87037
NOMPC::GFP	-40.4057	0.86964
NOMPC::GFP	-40.3604	0.86903
NOMPC::GFP	-40.3501	0.86889
NOMPC::GFP	-40.2603	0.86768
NOMPC::GFP	-40.1602	0.86631
NOMPC::GFP	-40.0601	0.86493
NOMPC::GFP	-39.96	0.86355
NOMPC::GFP	-39.8599	0.86214
NOMPC::GFP	-39.7969	0.86126
NOMPC::GFP	-39.7598	0.86073
NOMPC::GFP	-39.6597	0.85931
NOMPC::GFP	-39.5596	0.85787
NOMPC::GFP	-39.4595	0.85642
NOMPC::GFP	-39.3594	0.85496
NOMPC::GFP	-39.2593	0.85348
NOMPC::GFP	-39.1592	0.85199
NOMPC::GFP	-39.0591	0.85049
NOMPC::GFP	-38.959	0.84898
NOMPC::GFP	-38.8589	0.84746
NOMPC::GFP	-38.7588	0.84592
NOMPC::GFP	-38.6587	0.84437
NOMPC::GFP	-38.608	0.84358
NOMPC::GFP	-38.5586	0.84281
NOMPC::GFP	-38.4585	0.84123
NOMPC::GFP	-38.3584	0.83965
NOMPC::GFP	-38.2583	0.83805
NOMPC::GFP	-38.1582	0.83643
NOMPC::GFP	-38.0581	0.8348
NOMPC::GFP	-37.958	0.83317
NOMPC::GFP	-37.8579	0.83151
NOMPC::GFP	-37.7578	0.82985
NOMPC::GFP	-37.6577	0.82817
NOMPC::GFP	-37.5576	0.82648
NOMPC::GFP	-37.4575	0.82477
NOMPC::GFP	-37.3574	0.82305
NOMPC::GFP	-37.2573	0.82132
NOMPC::GFP	-37.1572	0.81958
NOMPC::GFP	-37.0571	0.81782
NOMPC::GFP	-36.957	0.81605
NOMPC::GFP	-36.8569	0.81427
NOMPC::GFP	-36.7568	0.81247
NOMPC::GFP	-36.6567	0.81066
NOMPC::GFP	-36.5566	0.80883
NOMPC::GFP	-36.4565	0.807
NOMPC::GFP	-36.4378	0.80665
NOMPC::GFP	-36.3599	0.80521
NOMPC::GFP	-36.3564	0.80515
NOMPC::GFP	-36.2563	0.80328
NOMPC::GFP	-36.2539	0.80324
NOMPC::GFP	-36.1562	0.8014
NOMPC::GFP	-36.0561	0.79951
NOMPC::GFP	-35.956	0.79761
NOMPC::GFP	-35.8559	0.79569
NOMPC::GFP	-35.7558	0.79376
NOMPC::GFP	-35.6557	0.79181
NOMPC::GFP	-35.5556	0.78985
NOMPC::GFP	-35.4555	0.78788
NOMPC::GFP	-35.3554	0.7859
NOMPC::GFP	-35.2553	0.7839
NOMPC::GFP	-35.1552	0.78188
NOMPC::GFP	-35.0551	0.77986
NOMPC::GFP	-34.9549	0.77782
NOMPC::GFP	-34.8548	0.77576
NOMPC::GFP	-34.7548	0.7737
NOMPC::GFP	-34.6546	0.77162
NOMPC::GFP	-34.5545	0.76952
NOMPC::GFP	-34.4545	0.76742
NOMPC::GFP	-34.3543	0.7653
NOMPC::GFP	-34.2542	0.76316
NOMPC::GFP	-34.1542	0.76102
NOMPC::GFP	-34.054	0.75886
NOMPC::GFP	-33.9539	0.75668
NOMPC::GFP	-33.8539	0.7545
NOMPC::GFP	-33.8087	0.7535
NOMPC::GFP	-33.7537	0.7523
NOMPC::GFP	-33.6536	0.75008
NOMPC::GFP	-33.5536	0.74786
NOMPC::GFP	-33.5091	0.74686
NOMPC::GFP	-33.4602	0.74577
NOMPC::GFP	-33.4534	0.74562
NOMPC::GFP	-33.4477	0.74549
NOMPC::GFP	-33.3533	0.74337
NOMPC::GFP	-33.2533	0.7411
NOMPC::GFP	-33.1531	0.73882
NOMPC::GFP	-33.053	0.73653
NOMPC::GFP	-32.953	0.73423
NOMPC::GFP	-32.8528	0.73191
NOMPC::GFP	-32.7527	0.72958
NOMPC::GFP	-32.6527	0.72724
NOMPC::GFP	-32.5525	0.72488
NOMPC::GFP	-32.4524	0.72251
NOMPC::GFP	-32.3524	0.72013
NOMPC::GFP	-32.2522	0.71774
NOMPC::GFP	-32.1521	0.71533
NOMPC::GFP	-32.0521	0.71292
NOMPC::GFP	-31.952	0.71049
NOMPC::GFP	-31.8518	0.70805
NOMPC::GFP	-31.7518	0.70559
NOMPC::GFP	-31.6517	0.70313
NOMPC::GFP	-31.5515	0.70065
NOMPC::GFP	-31.4515	0.69816
NOMPC::GFP	-31.3514	0.69566
NOMPC::GFP	-31.3389	0.69535
NOMPC::GFP	-31.2512	0.69315
NOMPC::GFP	-31.1512	0.69062
NOMPC::GFP	-31.1264	0.69
NOMPC::GFP	-31.0511	0.68809
NOMPC::GFP	-30.9509	0.68554
NOMPC::GFP	-30.8509	0.68298
NOMPC::GFP	-30.7508	0.68041
NOMPC::GFP	-30.6506	0.67783
NOMPC::GFP	-30.5506	0.67524
NOMPC::GFP	-30.4505	0.67264
NOMPC::GFP	-30.3503	0.67002
NOMPC::GFP	-30.2503	0.6674
NOMPC::GFP	-30.1502	0.66477
NOMPC::GFP	-30.05	0.66212
NOMPC::GFP	-29.95	0.65947
NOMPC::GFP	-29.8498	0.65681
NOMPC::GFP	-29.7497	0.65413
NOMPC::GFP	-29.6497	0.65145
NOMPC::GFP	-29.5495	0.64875
NOMPC::GFP	-29.4494	0.64605
NOMPC::GFP	-29.3745	0.64402
NOMPC::GFP	-29.3494	0.64334
NOMPC::GFP	-29.2492	0.64062
NOMPC::GFP	-29.2292	0.64007
NOMPC::GFP	-29.1491	0.63789
NOMPC::GFP	-29.0491	0.63515
NOMPC::GFP	-28.9489	0.6324
NOMPC::GFP	-28.8488	0.62964
NOMPC::GFP	-28.7488	0.62688
NOMPC::GFP	-28.6486	0.6241
NOMPC::GFP	-28.6151	0.62317
NOMPC::GFP	-28.5485	0.62132
NOMPC::GFP	-28.4485	0.61853
NOMPC::GFP	-28.3483	0.61573
NOMPC::GFP	-28.2482	0.61293
NOMPC::GFP	-28.1482	0.61011
NOMPC::GFP	-28.048	0.60729
NOMPC::GFP	-27.9479	0.60447
NOMPC::GFP	-27.8479	0.60163
NOMPC::GFP	-27.7477	0.59879
NOMPC::GFP	-27.6476	0.59594
NOMPC::GFP	-27.5476	0.59309
NOMPC::GFP	-27.4474	0.59023
NOMPC::GFP	-27.3473	0.58736
NOMPC::GFP	-27.2473	0.58449
NOMPC::GFP	-27.1471	0.58161
NOMPC::GFP	-27.047	0.57872
NOMPC::GFP	-26.947	0.57583
NOMPC::GFP	-26.8468	0.57294
NOMPC::GFP	-26.7467	0.57004
NOMPC::GFP	-26.6467	0.56713
NOMPC::GFP	-26.5465	0.56423
NOMPC::GFP	-26.4464	0.56131
NOMPC::GFP	-26.3464	0.55839
NOMPC::GFP	-26.2952	0.5569
NOMPC::GFP	-26.2948	0.55689
NOMPC::GFP	-26.2787	0.55642
NOMPC::GFP	-26.2462	0.55547
NOMPC::GFP	-26.1461	0.55255
NOMPC::GFP	-26.0461	0.54962
NOMPC::GFP	-26.027	0.54906
NOMPC::GFP	-25.9459	0.54668
NOMPC::GFP	-25.8458	0.54375
NOMPC::GFP	-25.7458	0.54081
NOMPC::GFP	-25.6456	0.53787
NOMPC::GFP	-25.5455	0.53492
NOMPC::GFP	-25.4455	0.53197
NOMPC::GFP	-25.3453	0.52903
NOMPC::GFP	-25.2452	0.52607
NOMPC::GFP	-25.1452	0.52312
NOMPC::GFP	-25.045	0.52017
NOMPC::GFP	-24.9449	0.51721
NOMPC::GFP	-24.8448	0.51425
NOMPC::GFP	-24.7447	0.51129
NOMPC::GFP	-24.6446	0.50834
NOMPC::GFP	-24.1441	0.49353
NOMPC::GFP	-24.044	0.49058
NOMPC::GFP	-23.9439	0.48762
NOMPC::GFP	-23.8582	0.48508
NOMPC::GFP	-23.8438	0.48466
NOMPC::GFP	-23.7437	0.4817
NOMPC::GFP	-23.6436	0.47875
NOMPC::GFP	-23.5435	0.47579
NOMPC::GFP	-23.4434	0.47284
NOMPC::GFP	-23.3433	0.46989
NOMPC::GFP	-23.2432	0.46694
NOMPC::GFP	-23.1431	0.46399
NOMPC::GFP	-23.043	0.46105
NOMPC::GFP	-22.9429	0.45811
NOMPC::GFP	-22.8428	0.45517
NOMPC::GFP	-22.7427	0.45224
NOMPC::GFP	-22.6426	0.4493
NOMPC::GFP	-22.5425	0.44638
NOMPC::GFP	-22.4424	0.44345
NOMPC::GFP	-22.4403	0.44339
NOMPC::GFP	-22.3423	0.44053
NOMPC::GFP	-22.2422	0.43762
NOMPC::GFP	-22.1421	0.4347
NOMPC::GFP	-22.042	0.4318
NOMPC::GFP	-21.9419	0.42889
NOMPC::GFP	-21.8418	0.42599
NOMPC::GFP	-21.7417	0.4231
NOMPC::GFP	-21.6416	0.42021
NOMPC::GFP	-21.6135	0.4194
NOMPC::GFP	-21.6108	0.41932
NOMPC::GFP	-21.5574	0.41779
NOMPC::GFP	-21.5415	0.41733
NOMPC::GFP	-21.4414	0.41446
NOMPC::GFP	-21.3413	0.41158
NOMPC::GFP	-21.2412	0.40872
NOMPC::GFP	-21.1411	0.40586
NOMPC::GFP	-21.041	0.40301
NOMPC::GFP	-20.9409	0.40016
NOMPC::GFP	-20.8408	0.39732
NOMPC::GFP	-20.7407	0.39449
NOMPC::GFP	-20.6406	0.39167
NOMPC::GFP	-20.5405	0.38885
NOMPC::GFP	-20.4404	0.38604
NOMPC::GFP	-20.3403	0.38324
NOMPC::GFP	-20.2402	0.38044
NOMPC::GFP	-20.1401	0.37766
NOMPC::GFP	-20.04	0.37488
NOMPC::GFP	-19.9399	0.37211
NOMPC::GFP	-19.8398	0.36934
NOMPC::GFP	-19.7397	0.36659
NOMPC::GFP	-19.6396	0.36384
NOMPC::GFP	-19.5395	0.36111
NOMPC::GFP	-19.4394	0.35838
NOMPC::GFP	-19.3393	0.35566
NOMPC::GFP	-19.2392	0.35295
NOMPC::GFP	-19.1391	0.35025
NOMPC::GFP	-19.039	0.34756
NOMPC::GFP	-18.9389	0.34488
NOMPC::GFP	-18.8388	0.34221
NOMPC::GFP	-18.7523	0.33991
NOMPC::GFP	-18.7387	0.33955
NOMPC::GFP	-18.7363	0.33949
NOMPC::GFP	-18.7178	0.339
NOMPC::GFP	-18.6386	0.3369
NOMPC::GFP	-18.5385	0.33426
NOMPC::GFP	-18.4384	0.33163
NOMPC::GFP	-18.3383	0.32901
NOMPC::GFP	-18.2382	0.3264
NOMPC::GFP	-18.1381	0.32381
NOMPC::GFP	-18.038	0.32122
NOMPC::GFP	-17.9379	0.31864
NOMPC::GFP	-17.8378	0.31608
NOMPC::GFP	-17.7377	0.31352
NOMPC::GFP	-17.6376	0.31098
NOMPC::GFP	-17.5375	0.30845
NOMPC::GFP	-17.4374	0.30593
NOMPC::GFP	-17.3373	0.30342
NOMPC::GFP	-17.2372	0.30092
NOMPC::GFP	-17.1371	0.29844
NOMPC::GFP	-17.037	0.29596
NOMPC::GFP	-16.9369	0.2935
NOMPC::GFP	-16.8368	0.29105
NOMPC::GFP	-16.7484	0.2889
NOMPC::GFP	-16.7367	0.28862
NOMPC::GFP	-16.6366	0.28619
NOMPC::GFP	-16.6343	0.28613
NOMPC::GFP	-16.5365	0.28378
NOMPC::GFP	-16.4364	0.28138
NOMPC::GFP	-16.3363	0.27899
NOMPC::GFP	-16.2362	0.27661
NOMPC::GFP	-16.1361	0.27425
NOMPC::GFP	-16.036	0.2719
NOMPC::GFP	-15.9359	0.26956
NOMPC::GFP	-15.8358	0.26724
NOMPC::GFP	-15.7357	0.26492
NOMPC::GFP	-15.6356	0.26262
NOMPC::GFP	-15.5355	0.26034
NOMPC::GFP	-15.4354	0.25806
NOMPC::GFP	-15.3353	0.2558
NOMPC::GFP	-15.2352	0.25356
NOMPC::GFP	-15.1351	0.25132
NOMPC::GFP	-15.035	0.2491
NOMPC::GFP	-14.9349	0.24689
NOMPC::GFP	-14.8348	0.2447
NOMPC::GFP	-14.7347	0.24251
NOMPC::GFP	-14.6346	0.24035
NOMPC::GFP	-14.5345	0.23819
NOMPC::GFP	-14.4624	0.23665
NOMPC::GFP	-14.4344	0.23605
NOMPC::GFP	-14.364	0.23455
NOMPC::GFP	-14.3343	0.23392
NOMPC::GFP	-14.2342	0.23181
NOMPC::GFP	-14.1341	0.2297
NOMPC::GFP	-14.034	0.22761
NOMPC::GFP	-13.9339	0.22554
NOMPC::GFP	-13.896	0.22476
NOMPC::GFP	-13.8338	0.22348
NOMPC::GFP	-13.7337	0.22143
NOMPC::GFP	-13.6336	0.2194
NOMPC::GFP	-13.5827	0.21837
NOMPC::GFP	-13.5335	0.21737
NOMPC::GFP	-13.4334	0.21537
NOMPC::GFP	-13.3333	0.21337
NOMPC::GFP	-13.2332	0.21139
NOMPC::GFP	-13.1331	0.20942
NOMPC::GFP	-13.033	0.20747
NOMPC::GFP	-12.9329	0.20553
NOMPC::GFP	-12.8328	0.2036
NOMPC::GFP	-12.7327	0.20169
NOMPC::GFP	-12.6326	0.19979
NOMPC::GFP	-12.5325	0.1979
NOMPC::GFP	-12.4324	0.19603
NOMPC::GFP	-12.3323	0.19417
NOMPC::GFP	-12.2322	0.19233
NOMPC::GFP	-12.1321	0.19049
NOMPC::GFP	-12.032	0.18867
NOMPC::GFP	-11.9319	0.18687
NOMPC::GFP	-11.8318	0.18507
NOMPC::GFP	-11.8245	0.18494
NOMPC::GFP	-11.8181	0.18483
NOMPC::GFP	-11.8131	0.18474
NOMPC::GFP	-11.7317	0.1833
NOMPC::GFP	-11.6316	0.18153
NOMPC::GFP	-11.5315	0.17978
NOMPC::GFP	-11.4314	0.17804
NOMPC::GFP	-11.3313	0.17631
NOMPC::GFP	-11.2312	0.1746
NOMPC::GFP	-11.1311	0.1729
NOMPC::GFP	-11.031	0.17121
NOMPC::GFP	-10.9309	0.16954
NOMPC::GFP	-10.8308	0.16788
NOMPC::GFP	-10.7307	0.16623
NOMPC::GFP	-10.6306	0.16459
NOMPC::GFP	-10.5305	0.16297
NOMPC::GFP	-10.4304	0.16136
NOMPC::GFP	-10.3303	0.15977
NOMPC::GFP	-10.2302	0.15818
NOMPC::GFP	-10.1301	0.15661
NOMPC::GFP	-10.03	0.15506
NOMPC::GFP	-9.92993	0.15351
NOMPC::GFP	-9.82983	0.15198
NOMPC::GFP	-9.72973	0.15046
NOMPC::GFP	-9.62963	0.14895
NOMPC::GFP	-9.52953	0.14746
NOMPC::GFP	-9.42943	0.14597
NOMPC::GFP	-9.32933	0.1445
NOMPC::GFP	-9.22923	0.14305
NOMPC::GFP	-9.12913	0.1416
NOMPC::GFP	-9.02903	0.14017
NOMPC::GFP	-8.95301	0.13909
NOMPC::GFP	-8.92893	0.13875
NOMPC::GFP	-8.82883	0.13734
NOMPC::GFP	-8.72873	0.13594
NOMPC::GFP	-8.62863	0.13456
NOMPC::GFP	-8.52853	0.13318
NOMPC::GFP	-8.42843	0.13182
NOMPC::GFP	-8.38978	0.1313
NOMPC::GFP	-8.32833	0.13047
NOMPC::GFP	-8.22823	0.12914
NOMPC::GFP	-8.12813	0.12781
NOMPC::GFP	-8.02803	0.1265
NOMPC::GFP	-7.92793	0.12519
NOMPC::GFP	-7.82783	0.1239
NOMPC::GFP	-7.72773	0.12262
NOMPC::GFP	-7.62763	0.12135
NOMPC::GFP	-7.52753	0.1201
NOMPC::GFP	-7.42743	0.11885
NOMPC::GFP	-7.32733	0.11762
NOMPC::GFP	-7.22723	0.11639
NOMPC::GFP	-7.12713	0.11518
NOMPC::GFP	-7.02703	0.11398
NOMPC::GFP	-6.92693	0.11279
NOMPC::GFP	-6.84839	0.11186
NOMPC::GFP	-6.83197	0.11167
NOMPC::GFP	-6.82683	0.11161
NOMPC::GFP	-6.81645	0.11149
NOMPC::GFP	-6.72673	0.11044
NOMPC::GFP	-6.62663	0.10928
NOMPC::GFP	-6.52653	0.10814
NOMPC::GFP	-6.42643	0.107
NOMPC::GFP	-6.32633	0.10587
NOMPC::GFP	-6.22623	0.10476
NOMPC::GFP	-6.12613	0.10365
NOMPC::GFP	-6.02603	0.10256
NOMPC::GFP	-5.92593	0.10147
NOMPC::GFP	-5.82583	0.1004
NOMPC::GFP	-5.72573	0.09933
NOMPC::GFP	-5.62563	0.09828
NOMPC::GFP	-5.52553	0.09723
NOMPC::GFP	-5.42543	0.0962
NOMPC::GFP	-5.32533	0.09518
NOMPC::GFP	-5.22523	0.09416
NOMPC::GFP	-5.12513	0.09316
NOMPC::GFP	-5.05258	0.09243
NOMPC::GFP	-5.02503	0.09216
NOMPC::GFP	-4.92492	0.09117
NOMPC::GFP	-4.82482	0.0902
NOMPC::GFP	-4.72472	0.08923
NOMPC::GFP	-4.62462	0.08827
NOMPC::GFP	-4.52452	0.08732
NOMPC::GFP	-4.42823	0.08642
NOMPC::GFP	-4.42442	0.08639
NOMPC::GFP	-4.41438	0.08629
NOMPC::GFP	-4.40694	0.08622
NOMPC::GFP	-4.32432	0.08546
NOMPC::GFP	-4.22422	0.08453
NOMPC::GFP	-4.12412	0.08362
NOMPC::GFP	-4.02402	0.08272
NOMPC::GFP	-3.92392	0.08183
NOMPC::GFP	-3.82382	0.08094
NOMPC::GFP	-3.72372	0.08006
NOMPC::GFP	-3.62362	0.0792
NOMPC::GFP	-3.52352	0.07834
NOMPC::GFP	-3.42342	0.07749
NOMPC::GFP	-3.32332	0.07664
NOMPC::GFP	-3.22322	0.07581
NOMPC::GFP	-3.12312	0.07498
NOMPC::GFP	-3.02302	0.07417
NOMPC::GFP	-2.92292	0.07336
NOMPC::GFP	-2.82282	0.07256
NOMPC::GFP	-2.72272	0.07176
NOMPC::GFP	-2.62262	0.07098
NOMPC::GFP	-2.52252	0.0702
NOMPC::GFP	-2.42242	0.06943
NOMPC::GFP	-2.32232	0.06867
NOMPC::GFP	-2.22222	0.06792
NOMPC::GFP	-2.12212	0.06717
NOMPC::GFP	-2.02202	0.06644
NOMPC::GFP	-1.92192	0.0657
NOMPC::GFP	-1.8529	0.06521
NOMPC::GFP	-1.82182	0.06498
NOMPC::GFP	-1.72172	0.06427
NOMPC::GFP	-1.62162	0.06356
NOMPC::GFP	-1.52152	0.06286
NOMPC::GFP	-1.42142	0.06216
NOMPC::GFP	-1.32132	0.06148
NOMPC::GFP	-1.22122	0.0608
NOMPC::GFP	-1.12112	0.06012
NOMPC::GFP	-1.02102	0.05946
NOMPC::GFP	-0.92092	0.0588
NOMPC::GFP	-0.82082	0.05815
NOMPC::GFP	-0.72072	0.0575
NOMPC::GFP	-0.62062	0.05686
NOMPC::GFP	-0.52052	0.05623
NOMPC::GFP	-0.42042	0.05561
NOMPC::GFP	-0.32032	0.05499
NOMPC::GFP	-0.22022	0.05438
NOMPC::GFP	-0.12012	0.05377
NOMPC::GFP	-0.02002	0.05317
NOMPC::GFP	0.0358	0.05284
NOMPC::GFP	0.0778	0.05259
NOMPC::GFP	0.08008	0.05258
NOMPC::GFP	0.10642	0.05242
NOMPC::GFP	0.18018	0.05199
NOMPC::GFP	0.28028	0.05141
NOMPC::GFP	0.38038	0.05084
NOMPC::GFP	0.48048	0.05027
NOMPC::GFP	0.5458	0.0499
NOMPC::GFP	0.58058	0.04971
NOMPC::GFP	0.68068	0.04915
NOMPC::GFP	0.78078	0.0486
NOMPC::GFP	0.88088	0.04805
NOMPC::GFP	0.98098	0.04752
NOMPC::GFP	1.08108	0.04698
NOMPC::GFP	1.18118	0.04646
NOMPC::GFP	1.28128	0.04593
NOMPC::GFP	1.38138	0.04542
NOMPC::GFP	1.48148	0.04491
NOMPC::GFP	1.58158	0.0444
NOMPC::GFP	1.68168	0.0439
NOMPC::GFP	1.78178	0.04341
NOMPC::GFP	1.88188	0.04292
NOMPC::GFP	1.9666	0.04251
NOMPC::GFP	1.97604	0.04246
NOMPC::GFP	1.98198	0.04243
NOMPC::GFP	1.98666	0.04241
NOMPC::GFP	2.08208	0.04196
NOMPC::GFP	2.18218	0.04148
NOMPC::GFP	2.28228	0.04101
NOMPC::GFP	2.38238	0.04055
NOMPC::GFP	2.48248	0.04009
NOMPC::GFP	2.58258	0.03964
NOMPC::GFP	2.68268	0.03919
NOMPC::GFP	2.78278	0.03875
NOMPC::GFP	2.88288	0.03831
NOMPC::GFP	2.98298	0.03788
NOMPC::GFP	3.08308	0.03745
NOMPC::GFP	3.18318	0.03702
NOMPC::GFP	3.28328	0.0366
NOMPC::GFP	3.38338	0.03619
NOMPC::GFP	3.48348	0.03578
NOMPC::GFP	3.58358	0.03537
NOMPC::GFP	3.68368	0.03497
NOMPC::GFP	3.78378	0.03457
NOMPC::GFP	3.88388	0.03418
NOMPC::GFP	3.98398	0.03379
NOMPC::GFP	4.08408	0.0334
NOMPC::GFP	4.18418	0.03302
NOMPC::GFP	4.28428	0.03265
NOMPC::GFP	4.38438	0.03228
NOMPC::GFP	4.48448	0.03191
NOMPC::GFP	4.51487	0.0318
NOMPC::GFP	4.58458	0.03154
NOMPC::GFP	4.68468	0.03118
NOMPC::GFP	4.78478	0.03083
NOMPC::GFP	4.88488	0.03048
NOMPC::GFP	4.98498	0.03013
NOMPC::GFP	5.08509	0.02979
NOMPC::GFP	5.18519	0.02944
NOMPC::GFP	5.28529	0.02911
NOMPC::GFP	5.38539	0.02878
NOMPC::GFP	5.48549	0.02845
NOMPC::GFP	5.58559	0.02812
NOMPC::GFP	5.68569	0.0278
NOMPC::GFP	5.78579	0.02748
NOMPC::GFP	5.88589	0.02717
NOMPC::GFP	5.98599	0.02686
NOMPC::GFP	6.08609	0.02655
NOMPC::GFP	6.18619	0.02624
NOMPC::GFP	6.28629	0.02594
NOMPC::GFP	6.38639	0.02564
NOMPC::GFP	6.48649	0.02535
NOMPC::GFP	6.58659	0.02506
NOMPC::GFP	6.68669	0.02477
NOMPC::GFP	6.78679	0.02449
NOMPC::GFP	6.88689	0.02421
NOMPC::GFP	6.98699	0.02393
NOMPC::GFP	7.02002	0.02384
NOMPC::GFP	7.02423	0.02383
NOMPC::GFP	7.08709	0.02365
NOMPC::GFP	7.18719	0.02338
NOMPC::GFP	7.28729	0.02311
NOMPC::GFP	7.38739	0.02285
NOMPC::GFP	7.48749	0.02258
NOMPC::GFP	7.58759	0.02232
NOMPC::GFP	7.68769	0.02207
NOMPC::GFP	7.78779	0.02181
NOMPC::GFP	7.88789	0.02156
NOMPC::GFP	7.98799	0.02131
NOMPC::GFP	8.08809	0.02107
NOMPC::GFP	8.18819	0.02082
NOMPC::GFP	8.28829	0.02058
NOMPC::GFP	8.38839	0.02035
NOMPC::GFP	8.48849	0.02011
NOMPC::GFP	8.58859	0.01988
NOMPC::GFP	8.68869	0.01965
NOMPC::GFP	8.78879	0.01942
NOMPC::GFP	8.88889	0.0192
NOMPC::GFP	8.91258	0.01915
NOMPC::GFP	8.92993	0.01911
NOMPC::GFP	8.96678	0.01903
NOMPC::GFP	8.98899	0.01898
NOMPC::GFP	9.08909	0.01876
NOMPC::GFP	9.18919	0.01854
NOMPC::GFP	9.28929	0.01833
NOMPC::GFP	9.38939	0.01812
NOMPC::GFP	9.48949	0.01791
NOMPC::GFP	9.58959	0.0177
NOMPC::GFP	9.68969	0.01749
NOMPC::GFP	9.78979	0.01729
NOMPC::GFP	9.88989	0.01709
NOMPC::GFP	9.98999	0.01689
NOMPC::GFP	10.0901	0.0167
NOMPC::GFP	10.1902	0.01651
NOMPC::GFP	10.2903	0.01631
NOMPC::GFP	10.3904	0.01613
NOMPC::GFP	10.4905	0.01594
NOMPC::GFP	10.5906	0.01575
NOMPC::GFP	10.6907	0.01557
NOMPC::GFP	10.7908	0.01539
NOMPC::GFP	10.8909	0.01521
NOMPC::GFP	10.991	0.01504
NOMPC::GFP	11.0911	0.01486
NOMPC::GFP	11.1912	0.01469
NOMPC::GFP	11.2913	0.01452
NOMPC::GFP	11.3914	0.01435
NOMPC::GFP	11.4915	0.01418
NOMPC::GFP	11.5916	0.01402
NOMPC::GFP	11.6917	0.01386
NOMPC::GFP	11.7918	0.0137
NOMPC::GFP	11.8919	0.01354
NOMPC::GFP	11.992	0.01338
NOMPC::GFP	12.0921	0.01322
NOMPC::GFP	12.1922	0.01307
NOMPC::GFP	12.2923	0.01292
NOMPC::GFP	12.3924	0.01277
NOMPC::GFP	12.4287	0.01271
NOMPC::GFP	12.4925	0.01262
NOMPC::GFP	12.5926	0.01247
NOMPC::GFP	12.6927	0.01233
NOMPC::GFP	12.7928	0.01219
NOMPC::GFP	12.8929	0.01204
NOMPC::GFP	12.993	0.0119
NOMPC::GFP	13.0931	0.01176
NOMPC::GFP	13.1932	0.01163
NOMPC::GFP	13.2933	0.01149
NOMPC::GFP	13.3934	0.01136
NOMPC::GFP	13.4935	0.01123
NOMPC::GFP	13.5936	0.0111
NOMPC::GFP	13.6937	0.01097
NOMPC::GFP	13.7938	0.01084
NOMPC::GFP	13.8939	0.01071
NOMPC::GFP	13.994	0.01059
NOMPC::GFP	14.0941	0.01046
NOMPC::GFP	14.1942	0.01034
NOMPC::GFP	14.2943	0.01022
NOMPC::GFP	14.3944	0.0101
NOMPC::GFP	14.4945	0.00999
NOMPC::GFP	14.5946	0.00987
NOMPC::GFP	14.6947	0.00975
NOMPC::GFP	14.7948	0.00964
NOMPC::GFP	14.8276	0.0096
NOMPC::GFP	14.8949	0.00953
NOMPC::GFP	14.995	0.00942
NOMPC::GFP	15.0951	0.00931
NOMPC::GFP	15.1952	0.0092
NOMPC::GFP	15.2953	0.00909
NOMPC::GFP	15.3954	0.00899
NOMPC::GFP	15.4955	0.00888
NOMPC::GFP	15.5956	0.00878
NOMPC::GFP	15.6957	0.00867
NOMPC::GFP	15.7958	0.00857
NOMPC::GFP	15.8959	0.00847
NOMPC::GFP	15.996	0.00837
NOMPC::GFP	16.0961	0.00828
NOMPC::GFP	16.1962	0.00818
NOMPC::GFP	16.2963	0.00808
NOMPC::GFP	16.3964	0.00799
NOMPC::GFP	16.4965	0.0079
NOMPC::GFP	16.5966	0.0078
NOMPC::GFP	16.6967	0.00771
NOMPC::GFP	16.7968	0.00762
NOMPC::GFP	16.8969	0.00753
NOMPC::GFP	16.997	0.00745
NOMPC::GFP	17.0971	0.00736
NOMPC::GFP	17.1972	0.00727
NOMPC::GFP	17.2973	0.00719
NOMPC::GFP	17.3974	0.0071
NOMPC::GFP	17.4975	0.00702
NOMPC::GFP	17.5976	0.00694
NOMPC::GFP	17.6977	0.00686
NOMPC::GFP	17.7978	0.00678
NOMPC::GFP	17.8979	0.0067
NOMPC::GFP	17.998	0.00662
NOMPC::GFP	18.0981	0.00654
NOMPC::GFP	18.1675	0.00649
NOMPC::GFP	18.1982	0.00647
NOMPC::GFP	18.2983	0.00639
NOMPC::GFP	18.3984	0.00632
NOMPC::GFP	18.4985	0.00624
NOMPC::GFP	18.5986	0.00617
NOMPC::GFP	18.6987	0.0061
NOMPC::GFP	18.7988	0.00603
NOMPC::GFP	18.8989	0.00595
NOMPC::GFP	18.999	0.00589
NOMPC::GFP	19.0991	0.00582
NOMPC::GFP	19.1992	0.00575
NOMPC::GFP	19.2993	0.00568
NOMPC::GFP	19.3994	0.00561
NOMPC::GFP	19.4995	0.00555
NOMPC::GFP	19.5996	0.00548
NOMPC::GFP	19.6997	0.00542
NOMPC::GFP	19.7998	0.00536
NOMPC::GFP	19.8999	0.00529
NOMPC::GFP	20	0.00523
AR+AR-NOMPC::GFP	-80	0.99974
AR+AR-NOMPC::GFP	-75.6957	0.99952
AR+AR-NOMPC::GFP	-75.5956	0.99951
AR+AR-NOMPC::GFP	-75.4955	0.9995
AR+AR-NOMPC::GFP	-75.3954	0.9995
AR+AR-NOMPC::GFP	-75.2953	0.99949
AR+AR-NOMPC::GFP	-75.1952	0.99948
AR+AR-NOMPC::GFP	-75.0951	0.99947
AR+AR-NOMPC::GFP	-74.995	0.99947
AR+AR-NOMPC::GFP	-74.8949	0.99946
AR+AR-NOMPC::GFP	-74.7948	0.99945
AR+AR-NOMPC::GFP	-74.6947	0.99944
AR+AR-NOMPC::GFP	-74.5946	0.99943
AR+AR-NOMPC::GFP	-74.4945	0.99943
AR+AR-NOMPC::GFP	-74.3944	0.99942
AR+AR-NOMPC::GFP	-74.2943	0.99941
AR+AR-NOMPC::GFP	-74.1942	0.9994
AR+AR-NOMPC::GFP	-74.0941	0.99939
AR+AR-NOMPC::GFP	-73.994	0.99938
AR+AR-NOMPC::GFP	-73.8939	0.99937
AR+AR-NOMPC::GFP	-73.7938	0.99936
AR+AR-NOMPC::GFP	-73.6937	0.99936
AR+AR-NOMPC::GFP	-73.5936	0.99935
AR+AR-NOMPC::GFP	-73.4935	0.99934
AR+AR-NOMPC::GFP	-73.3934	0.99933
AR+AR-NOMPC::GFP	-73.2933	0.99932
AR+AR-NOMPC::GFP	-73.1932	0.99931
AR+AR-NOMPC::GFP	-73.0931	0.9993
AR+AR-NOMPC::GFP	-72.993	0.99929
AR+AR-NOMPC::GFP	-72.8929	0.99928
AR+AR-NOMPC::GFP	-72.7928	0.99927
AR+AR-NOMPC::GFP	-72.6927	0.99926
AR+AR-NOMPC::GFP	-72.5926	0.99924
AR+AR-NOMPC::GFP	-72.4925	0.99923
AR+AR-NOMPC::GFP	-72.3924	0.99922
AR+AR-NOMPC::GFP	-72.2923	0.99921
AR+AR-NOMPC::GFP	-72.1922	0.9992
AR+AR-NOMPC::GFP	-72.0921	0.99919
AR+AR-NOMPC::GFP	-71.992	0.99918
AR+AR-NOMPC::GFP	-71.8919	0.99916
AR+AR-NOMPC::GFP	-71.7918	0.99915
AR+AR-NOMPC::GFP	-71.6917	0.99914
AR+AR-NOMPC::GFP	-71.5916	0.99913
AR+AR-NOMPC::GFP	-71.4915	0.99911
AR+AR-NOMPC::GFP	-71.3914	0.9991
AR+AR-NOMPC::GFP	-71.2913	0.99909
AR+AR-NOMPC::GFP	-71.1912	0.99907
AR+AR-NOMPC::GFP	-71.0911	0.99906
AR+AR-NOMPC::GFP	-70.991	0.99905
AR+AR-NOMPC::GFP	-70.8909	0.99903
AR+AR-NOMPC::GFP	-70.7908	0.99902
AR+AR-NOMPC::GFP	-70.6907	0.999
AR+AR-NOMPC::GFP	-70.5906	0.99899
AR+AR-NOMPC::GFP	-70.4905	0.99898
AR+AR-NOMPC::GFP	-70.3904	0.99896
AR+AR-NOMPC::GFP	-70.2903	0.99895
AR+AR-NOMPC::GFP	-70.1902	0.99893
AR+AR-NOMPC::GFP	-70.0901	0.99891
AR+AR-NOMPC::GFP	-69.99	0.9989
AR+AR-NOMPC::GFP	-69.8899	0.99888
AR+AR-NOMPC::GFP	-69.7898	0.99887
AR+AR-NOMPC::GFP	-69.6897	0.99885
AR+AR-NOMPC::GFP	-69.5896	0.99883
AR+AR-NOMPC::GFP	-69.4895	0.99882
AR+AR-NOMPC::GFP	-69.3894	0.9988
AR+AR-NOMPC::GFP	-69.2893	0.99878
AR+AR-NOMPC::GFP	-69.1892	0.99876
AR+AR-NOMPC::GFP	-69.0891	0.99875
AR+AR-NOMPC::GFP	-68.989	0.99873
AR+AR-NOMPC::GFP	-68.8889	0.99871
AR+AR-NOMPC::GFP	-68.7888	0.99869
AR+AR-NOMPC::GFP	-68.6887	0.99867
AR+AR-NOMPC::GFP	-68.5886	0.99865
AR+AR-NOMPC::GFP	-68.4885	0.99863
AR+AR-NOMPC::GFP	-68.3884	0.99861
AR+AR-NOMPC::GFP	-68.2883	0.99859
AR+AR-NOMPC::GFP	-68.1882	0.99857
AR+AR-NOMPC::GFP	-68.0881	0.99855
AR+AR-NOMPC::GFP	-67.988	0.99853
AR+AR-NOMPC::GFP	-67.8879	0.99851
AR+AR-NOMPC::GFP	-67.7878	0.99849
AR+AR-NOMPC::GFP	-67.6877	0.99846
AR+AR-NOMPC::GFP	-67.5876	0.99844
AR+AR-NOMPC::GFP	-67.4875	0.99842
AR+AR-NOMPC::GFP	-67.3874	0.99839
AR+AR-NOMPC::GFP	-67.2873	0.99837
AR+AR-NOMPC::GFP	-67.1872	0.99835
AR+AR-NOMPC::GFP	-67.0871	0.99832
AR+AR-NOMPC::GFP	-66.987	0.9983
AR+AR-NOMPC::GFP	-66.8869	0.99827
AR+AR-NOMPC::GFP	-66.7868	0.99825
AR+AR-NOMPC::GFP	-66.6867	0.99822
AR+AR-NOMPC::GFP	-66.5866	0.9982
AR+AR-NOMPC::GFP	-66.4865	0.99817
AR+AR-NOMPC::GFP	-66.3864	0.99814
AR+AR-NOMPC::GFP	-66.2863	0.99812
AR+AR-NOMPC::GFP	-66.1862	0.99809
AR+AR-NOMPC::GFP	-66.0861	0.99806
AR+AR-NOMPC::GFP	-65.986	0.99803
AR+AR-NOMPC::GFP	-65.8859	0.99801
AR+AR-NOMPC::GFP	-65.7858	0.99798
AR+AR-NOMPC::GFP	-65.6857	0.99795
AR+AR-NOMPC::GFP	-65.5856	0.99792
AR+AR-NOMPC::GFP	-65.4855	0.99789
AR+AR-NOMPC::GFP	-65.3854	0.99786
AR+AR-NOMPC::GFP	-65.2853	0.99782
AR+AR-NOMPC::GFP	-65.1852	0.99779
AR+AR-NOMPC::GFP	-65.0851	0.99776
AR+AR-NOMPC::GFP	-64.985	0.99773
AR+AR-NOMPC::GFP	-64.8849	0.9977
AR+AR-NOMPC::GFP	-64.7848	0.99766
AR+AR-NOMPC::GFP	-64.6847	0.99763
AR+AR-NOMPC::GFP	-64.5846	0.99759
AR+AR-NOMPC::GFP	-64.4845	0.99756
AR+AR-NOMPC::GFP	-64.3844	0.99752
AR+AR-NOMPC::GFP	-64.2843	0.99749
AR+AR-NOMPC::GFP	-64.1842	0.99745
AR+AR-NOMPC::GFP	-64.0841	0.99741
AR+AR-NOMPC::GFP	-63.984	0.99737
AR+AR-NOMPC::GFP	-63.8839	0.99734
AR+AR-NOMPC::GFP	-63.7838	0.9973
AR+AR-NOMPC::GFP	-63.6837	0.99726
AR+AR-NOMPC::GFP	-63.5836	0.99722
AR+AR-NOMPC::GFP	-63.4835	0.99718
AR+AR-NOMPC::GFP	-63.3834	0.99714
AR+AR-NOMPC::GFP	-63.2833	0.99709
AR+AR-NOMPC::GFP	-63.1832	0.99705
AR+AR-NOMPC::GFP	-63.0831	0.99701
AR+AR-NOMPC::GFP	-62.983	0.99697
AR+AR-NOMPC::GFP	-62.8829	0.99692
AR+AR-NOMPC::GFP	-62.7828	0.99688
AR+AR-NOMPC::GFP	-62.6827	0.99683
AR+AR-NOMPC::GFP	-62.5826	0.99679
AR+AR-NOMPC::GFP	-62.4825	0.99674
AR+AR-NOMPC::GFP	-62.3824	0.99669
AR+AR-NOMPC::GFP	-62.2823	0.99664
AR+AR-NOMPC::GFP	-62.1822	0.99659
AR+AR-NOMPC::GFP	-62.0821	0.99654
AR+AR-NOMPC::GFP	-61.982	0.99649
AR+AR-NOMPC::GFP	-61.8819	0.99644
AR+AR-NOMPC::GFP	-61.7818	0.99639
AR+AR-NOMPC::GFP	-61.6817	0.99634
AR+AR-NOMPC::GFP	-61.5816	0.99629
AR+AR-NOMPC::GFP	-61.4815	0.99623
AR+AR-NOMPC::GFP	-61.3814	0.99618
AR+AR-NOMPC::GFP	-61.2813	0.99612
AR+AR-NOMPC::GFP	-61.1812	0.99606
AR+AR-NOMPC::GFP	-61.0811	0.99601
AR+AR-NOMPC::GFP	-60.981	0.99595
AR+AR-NOMPC::GFP	-60.8809	0.99589
AR+AR-NOMPC::GFP	-60.7808	0.99583
AR+AR-NOMPC::GFP	-60.6807	0.99577
AR+AR-NOMPC::GFP	-60.5806	0.99571
AR+AR-NOMPC::GFP	-60.4805	0.99565
AR+AR-NOMPC::GFP	-60.3804	0.99558
AR+AR-NOMPC::GFP	-60.2803	0.99552
AR+AR-NOMPC::GFP	-60.1802	0.99545
AR+AR-NOMPC::GFP	-60.0801	0.99539
AR+AR-NOMPC::GFP	-59.98	0.99532
AR+AR-NOMPC::GFP	-59.8799	0.99525
AR+AR-NOMPC::GFP	-59.7798	0.99518
AR+AR-NOMPC::GFP	-59.6797	0.99511
AR+AR-NOMPC::GFP	-59.5796	0.99504
AR+AR-NOMPC::GFP	-59.4795	0.99497
AR+AR-NOMPC::GFP	-59.3794	0.9949
AR+AR-NOMPC::GFP	-59.2793	0.99482
AR+AR-NOMPC::GFP	-59.1792	0.99475
AR+AR-NOMPC::GFP	-59.0791	0.99467
AR+AR-NOMPC::GFP	-58.979	0.99459
AR+AR-NOMPC::GFP	-58.8789	0.99451
AR+AR-NOMPC::GFP	-58.7788	0.99444
AR+AR-NOMPC::GFP	-58.6787	0.99435
AR+AR-NOMPC::GFP	-58.5786	0.99427
AR+AR-NOMPC::GFP	-58.4785	0.99419
AR+AR-NOMPC::GFP	-58.3784	0.9941
AR+AR-NOMPC::GFP	-58.2783	0.99402
AR+AR-NOMPC::GFP	-58.1782	0.99393
AR+AR-NOMPC::GFP	-58.0781	0.99384
AR+AR-NOMPC::GFP	-57.978	0.99375
AR+AR-NOMPC::GFP	-57.8779	0.99366
AR+AR-NOMPC::GFP	-57.7778	0.99357
AR+AR-NOMPC::GFP	-57.6777	0.99348
AR+AR-NOMPC::GFP	-57.5776	0.99338
AR+AR-NOMPC::GFP	-57.4775	0.99329
AR+AR-NOMPC::GFP	-57.3774	0.99319
AR+AR-NOMPC::GFP	-57.2773	0.99309
AR+AR-NOMPC::GFP	-57.1772	0.99299
AR+AR-NOMPC::GFP	-57.0771	0.99289
AR+AR-NOMPC::GFP	-56.977	0.99279
AR+AR-NOMPC::GFP	-56.8769	0.99268
AR+AR-NOMPC::GFP	-56.7768	0.99258
AR+AR-NOMPC::GFP	-56.6767	0.99247
AR+AR-NOMPC::GFP	-56.5766	0.99236
AR+AR-NOMPC::GFP	-56.4765	0.99225
AR+AR-NOMPC::GFP	-56.3764	0.99214
AR+AR-NOMPC::GFP	-56.2763	0.99202
AR+AR-NOMPC::GFP	-56.1762	0.99191
AR+AR-NOMPC::GFP	-56.0761	0.99179
AR+AR-NOMPC::GFP	-55.976	0.99167
AR+AR-NOMPC::GFP	-55.8759	0.99155
AR+AR-NOMPC::GFP	-55.7758	0.99143
AR+AR-NOMPC::GFP	-55.6757	0.9913
AR+AR-NOMPC::GFP	-55.5756	0.99118
AR+AR-NOMPC::GFP	-55.4755	0.99105
AR+AR-NOMPC::GFP	-55.3754	0.99092
AR+AR-NOMPC::GFP	-55.2753	0.99079
AR+AR-NOMPC::GFP	-55.1752	0.99066
AR+AR-NOMPC::GFP	-55.0751	0.99052
AR+AR-NOMPC::GFP	-54.975	0.99038
AR+AR-NOMPC::GFP	-54.8749	0.99024
AR+AR-NOMPC::GFP	-54.7748	0.9901
AR+AR-NOMPC::GFP	-54.6747	0.98996
AR+AR-NOMPC::GFP	-54.5746	0.98981
AR+AR-NOMPC::GFP	-54.4745	0.98967
AR+AR-NOMPC::GFP	-54.3744	0.98952
AR+AR-NOMPC::GFP	-54.2743	0.98937
AR+AR-NOMPC::GFP	-54.1742	0.98921
AR+AR-NOMPC::GFP	-54.0741	0.98906
AR+AR-NOMPC::GFP	-53.974	0.9889
AR+AR-NOMPC::GFP	-53.8739	0.98874
AR+AR-NOMPC::GFP	-53.7738	0.98858
AR+AR-NOMPC::GFP	-53.6737	0.98841
AR+AR-NOMPC::GFP	-53.5736	0.98824
AR+AR-NOMPC::GFP	-53.4735	0.98807
AR+AR-NOMPC::GFP	-53.3734	0.9879
AR+AR-NOMPC::GFP	-53.2733	0.98773
AR+AR-NOMPC::GFP	-53.1732	0.98755
AR+AR-NOMPC::GFP	-53.0731	0.98737
AR+AR-NOMPC::GFP	-52.973	0.98719
AR+AR-NOMPC::GFP	-52.8729	0.987
AR+AR-NOMPC::GFP	-52.7728	0.98682
AR+AR-NOMPC::GFP	-52.6727	0.98663
AR+AR-NOMPC::GFP	-52.5726	0.98643
AR+AR-NOMPC::GFP	-52.4725	0.98624
AR+AR-NOMPC::GFP	-52.3724	0.98604
AR+AR-NOMPC::GFP	-52.2723	0.98584
AR+AR-NOMPC::GFP	-52.1722	0.98564
AR+AR-NOMPC::GFP	-52.0721	0.98543
AR+AR-NOMPC::GFP	-51.972	0.98522
AR+AR-NOMPC::GFP	-51.8719	0.98501
AR+AR-NOMPC::GFP	-51.7718	0.98479
AR+AR-NOMPC::GFP	-51.6717	0.98457
AR+AR-NOMPC::GFP	-51.5716	0.98435
AR+AR-NOMPC::GFP	-51.4715	0.98412
AR+AR-NOMPC::GFP	-51.3714	0.9839
AR+AR-NOMPC::GFP	-51.2713	0.98366
AR+AR-NOMPC::GFP	-51.1712	0.98343
AR+AR-NOMPC::GFP	-51.0711	0.98319
AR+AR-NOMPC::GFP	-50.971	0.98295
AR+AR-NOMPC::GFP	-50.8709	0.98271
AR+AR-NOMPC::GFP	-50.7708	0.98246
AR+AR-NOMPC::GFP	-50.6707	0.98221
AR+AR-NOMPC::GFP	-50.5706	0.98195
AR+AR-NOMPC::GFP	-50.4705	0.98169
AR+AR-NOMPC::GFP	-50.3704	0.98143
AR+AR-NOMPC::GFP	-50.2703	0.98116
AR+AR-NOMPC::GFP	-50.1702	0.98089
AR+AR-NOMPC::GFP	-50.0701	0.98062
AR+AR-NOMPC::GFP	-49.97	0.98034
AR+AR-NOMPC::GFP	-49.8699	0.98006
AR+AR-NOMPC::GFP	-49.7698	0.97978
AR+AR-NOMPC::GFP	-49.6697	0.97949
AR+AR-NOMPC::GFP	-49.5696	0.97919
AR+AR-NOMPC::GFP	-49.4695	0.97889
AR+AR-NOMPC::GFP	-49.3694	0.97859
AR+AR-NOMPC::GFP	-49.2693	0.97829
AR+AR-NOMPC::GFP	-49.1692	0.97798
AR+AR-NOMPC::GFP	-49.0691	0.97766
AR+AR-NOMPC::GFP	-48.969	0.97734
AR+AR-NOMPC::GFP	-48.8689	0.97702
AR+AR-NOMPC::GFP	-48.7688	0.97669
AR+AR-NOMPC::GFP	-48.6687	0.97636
AR+AR-NOMPC::GFP	-48.5686	0.97602
AR+AR-NOMPC::GFP	-48.4685	0.97568
AR+AR-NOMPC::GFP	-48.3684	0.97533
AR+AR-NOMPC::GFP	-48.2683	0.97498
AR+AR-NOMPC::GFP	-48.1682	0.97463
AR+AR-NOMPC::GFP	-48.0681	0.97427
AR+AR-NOMPC::GFP	-47.968	0.9739
AR+AR-NOMPC::GFP	-47.8679	0.97353
AR+AR-NOMPC::GFP	-47.7678	0.97315
AR+AR-NOMPC::GFP	-47.6677	0.97277
AR+AR-NOMPC::GFP	-47.5676	0.97238
AR+AR-NOMPC::GFP	-47.4675	0.97199
AR+AR-NOMPC::GFP	-47.3674	0.97159
AR+AR-NOMPC::GFP	-47.2673	0.97119
AR+AR-NOMPC::GFP	-47.1672	0.97078
AR+AR-NOMPC::GFP	-47.0671	0.97037
AR+AR-NOMPC::GFP	-46.967	0.96995
AR+AR-NOMPC::GFP	-46.8669	0.96952
AR+AR-NOMPC::GFP	-46.7668	0.96909
AR+AR-NOMPC::GFP	-46.6667	0.96865
AR+AR-NOMPC::GFP	-46.5666	0.96821
AR+AR-NOMPC::GFP	-46.4665	0.96776
AR+AR-NOMPC::GFP	-46.3664	0.96731
AR+AR-NOMPC::GFP	-46.2663	0.96684
AR+AR-NOMPC::GFP	-46.1662	0.96638
AR+AR-NOMPC::GFP	-46.0661	0.9659
AR+AR-NOMPC::GFP	-45.966	0.96542
AR+AR-NOMPC::GFP	-45.8659	0.96493
AR+AR-NOMPC::GFP	-45.7658	0.96444
AR+AR-NOMPC::GFP	-45.6657	0.96394
AR+AR-NOMPC::GFP	-45.5656	0.96343
AR+AR-NOMPC::GFP	-45.4655	0.96292
AR+AR-NOMPC::GFP	-45.3654	0.96239
AR+AR-NOMPC::GFP	-45.2653	0.96187
AR+AR-NOMPC::GFP	-45.1652	0.96133
AR+AR-NOMPC::GFP	-45.0651	0.96079
AR+AR-NOMPC::GFP	-44.965	0.96024
AR+AR-NOMPC::GFP	-44.8649	0.95968
AR+AR-NOMPC::GFP	-44.7648	0.95912
AR+AR-NOMPC::GFP	-44.6647	0.95854
AR+AR-NOMPC::GFP	-44.5646	0.95796
AR+AR-NOMPC::GFP	-44.4645	0.95737
AR+AR-NOMPC::GFP	-44.3644	0.95678
AR+AR-NOMPC::GFP	-44.2643	0.95618
AR+AR-NOMPC::GFP	-44.1642	0.95556
AR+AR-NOMPC::GFP	-44.0641	0.95494
AR+AR-NOMPC::GFP	-43.964	0.95432
AR+AR-NOMPC::GFP	-43.8639	0.95368
AR+AR-NOMPC::GFP	-43.7638	0.95303
AR+AR-NOMPC::GFP	-43.6637	0.95238
AR+AR-NOMPC::GFP	-43.5636	0.95172
AR+AR-NOMPC::GFP	-43.4635	0.95105
AR+AR-NOMPC::GFP	-43.3906	0.95055
AR+AR-NOMPC::GFP	-43.3634	0.95037
AR+AR-NOMPC::GFP	-43.2633	0.94968
AR+AR-NOMPC::GFP	-43.1632	0.94898
AR+AR-NOMPC::GFP	-43.0631	0.94827
AR+AR-NOMPC::GFP	-42.963	0.94756
AR+AR-NOMPC::GFP	-42.8629	0.94683
AR+AR-NOMPC::GFP	-42.7628	0.9461
AR+AR-NOMPC::GFP	-42.6627	0.94535
AR+AR-NOMPC::GFP	-42.5626	0.9446
AR+AR-NOMPC::GFP	-42.4625	0.94384
AR+AR-NOMPC::GFP	-42.3624	0.94306
AR+AR-NOMPC::GFP	-42.2623	0.94228
AR+AR-NOMPC::GFP	-42.1622	0.94148
AR+AR-NOMPC::GFP	-42.0621	0.94068
AR+AR-NOMPC::GFP	-41.962	0.93987
AR+AR-NOMPC::GFP	-41.8619	0.93904
AR+AR-NOMPC::GFP	-41.8254	0.93874
AR+AR-NOMPC::GFP	-41.7618	0.93821
AR+AR-NOMPC::GFP	-41.6617	0.93736
AR+AR-NOMPC::GFP	-41.5616	0.9365
AR+AR-NOMPC::GFP	-41.4615	0.93563
AR+AR-NOMPC::GFP	-41.3614	0.93476
AR+AR-NOMPC::GFP	-41.2613	0.93387
AR+AR-NOMPC::GFP	-41.1612	0.93296
AR+AR-NOMPC::GFP	-41.0611	0.93205
AR+AR-NOMPC::GFP	-40.961	0.93113
AR+AR-NOMPC::GFP	-40.8609	0.93019
AR+AR-NOMPC::GFP	-40.7608	0.92924
AR+AR-NOMPC::GFP	-40.6607	0.92828
AR+AR-NOMPC::GFP	-40.5606	0.92731
AR+AR-NOMPC::GFP	-40.4605	0.92633
AR+AR-NOMPC::GFP	-40.4153	0.92588
AR+AR-NOMPC::GFP	-40.3604	0.92533
AR+AR-NOMPC::GFP	-40.2603	0.92432
AR+AR-NOMPC::GFP	-40.1602	0.9233
AR+AR-NOMPC::GFP	-40.0601	0.92227
AR+AR-NOMPC::GFP	-39.96	0.92122
AR+AR-NOMPC::GFP	-39.8599	0.92017
AR+AR-NOMPC::GFP	-39.7598	0.91909
AR+AR-NOMPC::GFP	-39.6597	0.91801
AR+AR-NOMPC::GFP	-39.5596	0.91691
AR+AR-NOMPC::GFP	-39.4595	0.9158
AR+AR-NOMPC::GFP	-39.3594	0.91467
AR+AR-NOMPC::GFP	-39.2593	0.91353
AR+AR-NOMPC::GFP	-39.1592	0.91238
AR+AR-NOMPC::GFP	-39.0591	0.91122
AR+AR-NOMPC::GFP	-38.959	0.91004
AR+AR-NOMPC::GFP	-38.8589	0.90884
AR+AR-NOMPC::GFP	-38.7588	0.90763
AR+AR-NOMPC::GFP	-38.6587	0.90641
AR+AR-NOMPC::GFP	-38.5586	0.90517
AR+AR-NOMPC::GFP	-38.4585	0.90392
AR+AR-NOMPC::GFP	-38.3584	0.90265
AR+AR-NOMPC::GFP	-38.2583	0.90137
AR+AR-NOMPC::GFP	-38.1582	0.90007
AR+AR-NOMPC::GFP	-38.0581	0.89876
AR+AR-NOMPC::GFP	-37.958	0.89743
AR+AR-NOMPC::GFP	-37.8579	0.89609
AR+AR-NOMPC::GFP	-37.7578	0.89473
AR+AR-NOMPC::GFP	-37.6577	0.89336
AR+AR-NOMPC::GFP	-37.5576	0.89197
AR+AR-NOMPC::GFP	-37.4575	0.89056
AR+AR-NOMPC::GFP	-37.3574	0.88914
AR+AR-NOMPC::GFP	-37.2573	0.88771
AR+AR-NOMPC::GFP	-37.1572	0.88625
AR+AR-NOMPC::GFP	-37.0571	0.88478
AR+AR-NOMPC::GFP	-36.957	0.88329
AR+AR-NOMPC::GFP	-36.8607	0.88185
AR+AR-NOMPC::GFP	-36.8569	0.88179
AR+AR-NOMPC::GFP	-36.7568	0.88027
AR+AR-NOMPC::GFP	-36.6567	0.87873
AR+AR-NOMPC::GFP	-36.5566	0.87718
AR+AR-NOMPC::GFP	-36.4565	0.87561
AR+AR-NOMPC::GFP	-36.4052	0.8748
AR+AR-NOMPC::GFP	-36.3564	0.87402
AR+AR-NOMPC::GFP	-36.2563	0.87242
AR+AR-NOMPC::GFP	-36.1562	0.87079
AR+AR-NOMPC::GFP	-36.0561	0.86915
AR+AR-NOMPC::GFP	-35.956	0.86749
AR+AR-NOMPC::GFP	-35.8559	0.86582
AR+AR-NOMPC::GFP	-35.7558	0.86412
AR+AR-NOMPC::GFP	-35.6557	0.86241
AR+AR-NOMPC::GFP	-35.5556	0.86068
AR+AR-NOMPC::GFP	-35.4555	0.85893
AR+AR-NOMPC::GFP	-35.3554	0.85717
AR+AR-NOMPC::GFP	-35.2553	0.85538
AR+AR-NOMPC::GFP	-35.1552	0.85358
AR+AR-NOMPC::GFP	-35.0551	0.85176
AR+AR-NOMPC::GFP	-34.9549	0.84992
AR+AR-NOMPC::GFP	-34.8548	0.84806
AR+AR-NOMPC::GFP	-34.7548	0.84618
AR+AR-NOMPC::GFP	-34.6546	0.84428
AR+AR-NOMPC::GFP	-34.5545	0.84236
AR+AR-NOMPC::GFP	-34.4545	0.84043
AR+AR-NOMPC::GFP	-34.3543	0.83847
AR+AR-NOMPC::GFP	-34.2542	0.8365
AR+AR-NOMPC::GFP	-34.1542	0.83451
AR+AR-NOMPC::GFP	-34.054	0.83249
AR+AR-NOMPC::GFP	-33.9539	0.83046
AR+AR-NOMPC::GFP	-33.8539	0.82841
AR+AR-NOMPC::GFP	-33.7537	0.82634
AR+AR-NOMPC::GFP	-33.6536	0.82425
AR+AR-NOMPC::GFP	-33.5536	0.82214
AR+AR-NOMPC::GFP	-33.4742	0.82045
AR+AR-NOMPC::GFP	-33.4534	0.82001
AR+AR-NOMPC::GFP	-33.3533	0.81786
AR+AR-NOMPC::GFP	-33.2533	0.81569
AR+AR-NOMPC::GFP	-33.1531	0.8135
AR+AR-NOMPC::GFP	-33.053	0.81128
AR+AR-NOMPC::GFP	-32.953	0.80905
AR+AR-NOMPC::GFP	-32.8528	0.8068
AR+AR-NOMPC::GFP	-32.7527	0.80453
AR+AR-NOMPC::GFP	-32.6527	0.80224
AR+AR-NOMPC::GFP	-32.5525	0.79993
AR+AR-NOMPC::GFP	-32.4524	0.7976
AR+AR-NOMPC::GFP	-32.3524	0.79525
AR+AR-NOMPC::GFP	-32.2522	0.79288
AR+AR-NOMPC::GFP	-32.1521	0.79048
AR+AR-NOMPC::GFP	-32.0521	0.78807
AR+AR-NOMPC::GFP	-31.952	0.78564
AR+AR-NOMPC::GFP	-31.8518	0.78319
AR+AR-NOMPC::GFP	-31.8254	0.78254
AR+AR-NOMPC::GFP	-31.7518	0.78072
AR+AR-NOMPC::GFP	-31.6517	0.77822
AR+AR-NOMPC::GFP	-31.5627	0.77599
AR+AR-NOMPC::GFP	-31.5515	0.77571
AR+AR-NOMPC::GFP	-31.4515	0.77318
AR+AR-NOMPC::GFP	-31.3514	0.77062
AR+AR-NOMPC::GFP	-31.2512	0.76805
AR+AR-NOMPC::GFP	-31.1512	0.76545
AR+AR-NOMPC::GFP	-31.0511	0.76284
AR+AR-NOMPC::GFP	-30.9509	0.76021
AR+AR-NOMPC::GFP	-30.8509	0.75755
AR+AR-NOMPC::GFP	-30.7508	0.75488
AR+AR-NOMPC::GFP	-30.6506	0.75219
AR+AR-NOMPC::GFP	-30.5506	0.74947
AR+AR-NOMPC::GFP	-30.4505	0.74674
AR+AR-NOMPC::GFP	-30.3503	0.74399
AR+AR-NOMPC::GFP	-30.2503	0.74121
AR+AR-NOMPC::GFP	-30.1502	0.73842
AR+AR-NOMPC::GFP	-30.05	0.73561
AR+AR-NOMPC::GFP	-29.95	0.73278
AR+AR-NOMPC::GFP	-29.8498	0.72993
AR+AR-NOMPC::GFP	-29.7497	0.72706
AR+AR-NOMPC::GFP	-29.6497	0.72418
AR+AR-NOMPC::GFP	-29.5495	0.72127
AR+AR-NOMPC::GFP	-29.4494	0.71834
AR+AR-NOMPC::GFP	-29.3494	0.7154
AR+AR-NOMPC::GFP	-29.2492	0.71244
AR+AR-NOMPC::GFP	-29.1491	0.70946
AR+AR-NOMPC::GFP	-29.0491	0.70646
AR+AR-NOMPC::GFP	-28.9489	0.70344
AR+AR-NOMPC::GFP	-28.8488	0.70041
AR+AR-NOMPC::GFP	-28.7488	0.69736
AR+AR-NOMPC::GFP	-28.6486	0.69429
AR+AR-NOMPC::GFP	-28.5826	0.69225
AR+AR-NOMPC::GFP	-28.5485	0.6912
AR+AR-NOMPC::GFP	-28.4485	0.6881
AR+AR-NOMPC::GFP	-28.3483	0.68497
AR+AR-NOMPC::GFP	-28.2482	0.68184
AR+AR-NOMPC::GFP	-28.1482	0.67868
AR+AR-NOMPC::GFP	-28.048	0.67551
AR+AR-NOMPC::GFP	-27.9479	0.67232
AR+AR-NOMPC::GFP	-27.8479	0.66912
AR+AR-NOMPC::GFP	-27.7477	0.6659
AR+AR-NOMPC::GFP	-27.6476	0.66267
AR+AR-NOMPC::GFP	-27.5476	0.65942
AR+AR-NOMPC::GFP	-27.4474	0.65615
AR+AR-NOMPC::GFP	-27.3473	0.65287
AR+AR-NOMPC::GFP	-27.3291	0.65228
AR+AR-NOMPC::GFP	-27.2786	0.65061
AR+AR-NOMPC::GFP	-27.2473	0.64958
AR+AR-NOMPC::GFP	-27.1471	0.64627
AR+AR-NOMPC::GFP	-27.047	0.64295
AR+AR-NOMPC::GFP	-26.947	0.63961
AR+AR-NOMPC::GFP	-26.8468	0.63626
AR+AR-NOMPC::GFP	-26.7467	0.6329
AR+AR-NOMPC::GFP	-26.6467	0.62952
AR+AR-NOMPC::GFP	-26.5465	0.62614
AR+AR-NOMPC::GFP	-26.4464	0.62273
AR+AR-NOMPC::GFP	-26.3464	0.61932
AR+AR-NOMPC::GFP	-26.2462	0.6159
AR+AR-NOMPC::GFP	-26.2258	0.6152
AR+AR-NOMPC::GFP	-26.2258	0.6152
AR+AR-NOMPC::GFP	-26.1461	0.61246
AR+AR-NOMPC::GFP	-26.0461	0.60901
AR+AR-NOMPC::GFP	-25.9459	0.60555
AR+AR-NOMPC::GFP	-25.8458	0.60208
AR+AR-NOMPC::GFP	-25.7458	0.5986
AR+AR-NOMPC::GFP	-25.6456	0.59511
AR+AR-NOMPC::GFP	-25.5455	0.59161
AR+AR-NOMPC::GFP	-25.4455	0.5881
AR+AR-NOMPC::GFP	-25.3453	0.58459
AR+AR-NOMPC::GFP	-25.2452	0.58106
AR+AR-NOMPC::GFP	-25.1452	0.57753
AR+AR-NOMPC::GFP	-25.045	0.57398
AR+AR-NOMPC::GFP	-24.9449	0.57043
AR+AR-NOMPC::GFP	-24.8448	0.56688
AR+AR-NOMPC::GFP	-24.7447	0.56331
AR+AR-NOMPC::GFP	-24.6446	0.55974
AR+AR-NOMPC::GFP	-24.5445	0.55616
AR+AR-NOMPC::GFP	-24.4444	0.55258
AR+AR-NOMPC::GFP	-24.3443	0.54899
AR+AR-NOMPC::GFP	-24.2442	0.5454
AR+AR-NOMPC::GFP	-24.1441	0.5418
AR+AR-NOMPC::GFP	-24.044	0.5382
AR+AR-NOMPC::GFP	-23.9439	0.53459
AR+AR-NOMPC::GFP	-23.8438	0.53098
AR+AR-NOMPC::GFP	-23.7437	0.52737
AR+AR-NOMPC::GFP	-23.6436	0.52375
AR+AR-NOMPC::GFP	-23.5435	0.52013
AR+AR-NOMPC::GFP	-23.4434	0.51651
AR+AR-NOMPC::GFP	-23.3433	0.51289
AR+AR-NOMPC::GFP	-23.2432	0.50927
AR+AR-NOMPC::GFP	-23.1431	0.50564
AR+AR-NOMPC::GFP	-23.043	0.50201
AR+AR-NOMPC::GFP	-22.9429	0.49839
AR+AR-NOMPC::GFP	-22.8428	0.49476
AR+AR-NOMPC::GFP	-22.7427	0.49114
AR+AR-NOMPC::GFP	-22.6426	0.48751
AR+AR-NOMPC::GFP	-22.5425	0.48389
AR+AR-NOMPC::GFP	-22.4424	0.48027
AR+AR-NOMPC::GFP	-22.3423	0.47665
AR+AR-NOMPC::GFP	-22.3279	0.47613
AR+AR-NOMPC::GFP	-22.2422	0.47303
AR+AR-NOMPC::GFP	-22.1421	0.46942
AR+AR-NOMPC::GFP	-22.042	0.46581
AR+AR-NOMPC::GFP	-21.9419	0.4622
AR+AR-NOMPC::GFP	-21.8418	0.4586
AR+AR-NOMPC::GFP	-21.8309	0.45821
AR+AR-NOMPC::GFP	-21.7417	0.455
AR+AR-NOMPC::GFP	-21.6416	0.45141
AR+AR-NOMPC::GFP	-21.5828	0.4493
AR+AR-NOMPC::GFP	-21.5415	0.44782
AR+AR-NOMPC::GFP	-21.4414	0.44423
AR+AR-NOMPC::GFP	-21.3413	0.44066
AR+AR-NOMPC::GFP	-21.2412	0.43709
AR+AR-NOMPC::GFP	-21.1411	0.43352
AR+AR-NOMPC::GFP	-21.041	0.42996
AR+AR-NOMPC::GFP	-20.9409	0.42641
AR+AR-NOMPC::GFP	-20.8408	0.42287
AR+AR-NOMPC::GFP	-20.7407	0.41933
AR+AR-NOMPC::GFP	-20.6406	0.41581
AR+AR-NOMPC::GFP	-20.5405	0.41229
AR+AR-NOMPC::GFP	-20.4404	0.40878
AR+AR-NOMPC::GFP	-20.3403	0.40528
AR+AR-NOMPC::GFP	-20.2402	0.40179
AR+AR-NOMPC::GFP	-20.1401	0.3983
AR+AR-NOMPC::GFP	-20.04	0.39483
AR+AR-NOMPC::GFP	-19.9399	0.39137
AR+AR-NOMPC::GFP	-19.8398	0.38792
AR+AR-NOMPC::GFP	-19.7397	0.38449
AR+AR-NOMPC::GFP	-19.6396	0.38106
AR+AR-NOMPC::GFP	-19.5599	0.37834
AR+AR-NOMPC::GFP	-19.5395	0.37765
AR+AR-NOMPC::GFP	-19.4394	0.37424
AR+AR-NOMPC::GFP	-19.3393	0.37085
AR+AR-NOMPC::GFP	-19.2392	0.36748
AR+AR-NOMPC::GFP	-19.1391	0.36411
AR+AR-NOMPC::GFP	-19.039	0.36076
AR+AR-NOMPC::GFP	-18.9389	0.35742
AR+AR-NOMPC::GFP	-18.8388	0.3541
AR+AR-NOMPC::GFP	-18.7556	0.35134
AR+AR-NOMPC::GFP	-18.7556	0.35134
AR+AR-NOMPC::GFP	-18.7387	0.35079
AR+AR-NOMPC::GFP	-18.6386	0.34749
AR+AR-NOMPC::GFP	-18.5385	0.34421
AR+AR-NOMPC::GFP	-18.4384	0.34094
AR+AR-NOMPC::GFP	-18.3383	0.33769
AR+AR-NOMPC::GFP	-18.2382	0.33446
AR+AR-NOMPC::GFP	-18.1381	0.33124
AR+AR-NOMPC::GFP	-18.038	0.32803
AR+AR-NOMPC::GFP	-17.9379	0.32484
AR+AR-NOMPC::GFP	-17.8378	0.32167
AR+AR-NOMPC::GFP	-17.7377	0.31851
AR+AR-NOMPC::GFP	-17.6376	0.31537
AR+AR-NOMPC::GFP	-17.5375	0.31225
AR+AR-NOMPC::GFP	-17.4374	0.30914
AR+AR-NOMPC::GFP	-17.3475	0.30637
AR+AR-NOMPC::GFP	-17.3373	0.30606
AR+AR-NOMPC::GFP	-17.2372	0.30298
AR+AR-NOMPC::GFP	-17.1371	0.29993
AR+AR-NOMPC::GFP	-17.037	0.29689
AR+AR-NOMPC::GFP	-16.9369	0.29388
AR+AR-NOMPC::GFP	-16.8368	0.29087
AR+AR-NOMPC::GFP	-16.7367	0.28789
AR+AR-NOMPC::GFP	-16.6366	0.28493
AR+AR-NOMPC::GFP	-16.5365	0.28198
AR+AR-NOMPC::GFP	-16.4364	0.27906
AR+AR-NOMPC::GFP	-16.3363	0.27615
AR+AR-NOMPC::GFP	-16.2362	0.27326
AR+AR-NOMPC::GFP	-16.1361	0.27039
AR+AR-NOMPC::GFP	-16.036	0.26753
AR+AR-NOMPC::GFP	-15.9359	0.2647
AR+AR-NOMPC::GFP	-15.8358	0.26189
AR+AR-NOMPC::GFP	-15.7357	0.2591
AR+AR-NOMPC::GFP	-15.6356	0.25632
AR+AR-NOMPC::GFP	-15.5355	0.25357
AR+AR-NOMPC::GFP	-15.4354	0.25083
AR+AR-NOMPC::GFP	-15.3353	0.24812
AR+AR-NOMPC::GFP	-15.2352	0.24542
AR+AR-NOMPC::GFP	-15.1351	0.24274
AR+AR-NOMPC::GFP	-15.035	0.24009
AR+AR-NOMPC::GFP	-14.9349	0.23745
AR+AR-NOMPC::GFP	-14.8348	0.23484
AR+AR-NOMPC::GFP	-14.7347	0.23224
AR+AR-NOMPC::GFP	-14.6346	0.22966
AR+AR-NOMPC::GFP	-14.5345	0.22711
AR+AR-NOMPC::GFP	-14.534	0.22709
AR+AR-NOMPC::GFP	-14.4344	0.22457
AR+AR-NOMPC::GFP	-14.3343	0.22206
AR+AR-NOMPC::GFP	-14.2342	0.21956
AR+AR-NOMPC::GFP	-14.1341	0.21709
AR+AR-NOMPC::GFP	-14.034	0.21463
AR+AR-NOMPC::GFP	-13.9339	0.2122
AR+AR-NOMPC::GFP	-13.8338	0.20978
AR+AR-NOMPC::GFP	-13.8088	0.20918
AR+AR-NOMPC::GFP	-13.7337	0.20739
AR+AR-NOMPC::GFP	-13.6336	0.20501
AR+AR-NOMPC::GFP	-13.5335	0.20266
AR+AR-NOMPC::GFP	-13.4334	0.20033
AR+AR-NOMPC::GFP	-13.3333	0.19801
AR+AR-NOMPC::GFP	-13.2332	0.19572
AR+AR-NOMPC::GFP	-13.1331	0.19345
AR+AR-NOMPC::GFP	-13.033	0.1912
AR+AR-NOMPC::GFP	-12.9329	0.18896
AR+AR-NOMPC::GFP	-12.8328	0.18675
AR+AR-NOMPC::GFP	-12.7327	0.18456
AR+AR-NOMPC::GFP	-12.6326	0.18238
AR+AR-NOMPC::GFP	-12.591	0.18149
AR+AR-NOMPC::GFP	-12.5899	0.18146
AR+AR-NOMPC::GFP	-12.5325	0.18023
AR+AR-NOMPC::GFP	-12.4324	0.1781
AR+AR-NOMPC::GFP	-12.3323	0.17599
AR+AR-NOMPC::GFP	-12.2329	0.17391
AR+AR-NOMPC::GFP	-12.2322	0.17389
AR+AR-NOMPC::GFP	-12.1321	0.17182
AR+AR-NOMPC::GFP	-12.032	0.16976
AR+AR-NOMPC::GFP	-11.9319	0.16773
AR+AR-NOMPC::GFP	-11.8704	0.16649
AR+AR-NOMPC::GFP	-11.8318	0.16572
AR+AR-NOMPC::GFP	-11.7317	0.16372
AR+AR-NOMPC::GFP	-11.6316	0.16174
AR+AR-NOMPC::GFP	-11.5315	0.15979
AR+AR-NOMPC::GFP	-11.4314	0.15785
AR+AR-NOMPC::GFP	-11.3313	0.15593
AR+AR-NOMPC::GFP	-11.2312	0.15403
AR+AR-NOMPC::GFP	-11.1311	0.15215
AR+AR-NOMPC::GFP	-11.031	0.15029
AR+AR-NOMPC::GFP	-10.9309	0.14845
AR+AR-NOMPC::GFP	-10.8308	0.14662
AR+AR-NOMPC::GFP	-10.7307	0.14482
AR+AR-NOMPC::GFP	-10.6306	0.14303
AR+AR-NOMPC::GFP	-10.5305	0.14126
AR+AR-NOMPC::GFP	-10.4304	0.13951
AR+AR-NOMPC::GFP	-10.3303	0.13778
AR+AR-NOMPC::GFP	-10.2302	0.13607
AR+AR-NOMPC::GFP	-10.1301	0.13437
AR+AR-NOMPC::GFP	-10.03	0.13269
AR+AR-NOMPC::GFP	-9.92993	0.13103
AR+AR-NOMPC::GFP	-9.82983	0.12939
AR+AR-NOMPC::GFP	-9.72973	0.12776
AR+AR-NOMPC::GFP	-9.62963	0.12616
AR+AR-NOMPC::GFP	-9.52953	0.12457
AR+AR-NOMPC::GFP	-9.42943	0.12299
AR+AR-NOMPC::GFP	-9.32933	0.12144
AR+AR-NOMPC::GFP	-9.22923	0.1199
AR+AR-NOMPC::GFP	-9.12913	0.11838
AR+AR-NOMPC::GFP	-9.02903	0.11687
AR+AR-NOMPC::GFP	-8.92893	0.11538
AR+AR-NOMPC::GFP	-8.82883	0.11391
AR+AR-NOMPC::GFP	-8.72873	0.11246
AR+AR-NOMPC::GFP	-8.62863	0.11102
AR+AR-NOMPC::GFP	-8.52853	0.10959
AR+AR-NOMPC::GFP	-8.42843	0.10819
AR+AR-NOMPC::GFP	-8.32833	0.10679
AR+AR-NOMPC::GFP	-8.22823	0.10542
AR+AR-NOMPC::GFP	-8.12813	0.10406
AR+AR-NOMPC::GFP	-8.02803	0.10271
AR+AR-NOMPC::GFP	-7.92793	0.10139
AR+AR-NOMPC::GFP	-7.82783	0.10007
AR+AR-NOMPC::GFP	-7.72773	0.09877
AR+AR-NOMPC::GFP	-7.6502	0.09778
AR+AR-NOMPC::GFP	-7.62763	0.09749
AR+AR-NOMPC::GFP	-7.52753	0.09622
AR+AR-NOMPC::GFP	-7.42743	0.09497
AR+AR-NOMPC::GFP	-7.32733	0.09373
AR+AR-NOMPC::GFP	-7.22723	0.0925
AR+AR-NOMPC::GFP	-7.12713	0.09129
AR+AR-NOMPC::GFP	-7.02703	0.0901
AR+AR-NOMPC::GFP	-6.92693	0.08891
AR+AR-NOMPC::GFP	-6.82683	0.08775
AR+AR-NOMPC::GFP	-6.74019	0.08675
AR+AR-NOMPC::GFP	-6.72673	0.08659
AR+AR-NOMPC::GFP	-6.62663	0.08545
AR+AR-NOMPC::GFP	-6.52653	0.08433
AR+AR-NOMPC::GFP	-6.42643	0.08321
AR+AR-NOMPC::GFP	-6.32633	0.08211
AR+AR-NOMPC::GFP	-6.22623	0.08103
AR+AR-NOMPC::GFP	-6.12613	0.07995
AR+AR-NOMPC::GFP	-6.02603	0.07889
AR+AR-NOMPC::GFP	-5.92593	0.07785
AR+AR-NOMPC::GFP	-5.82583	0.07681
AR+AR-NOMPC::GFP	-5.76993	0.07624
AR+AR-NOMPC::GFP	-5.72573	0.07579
AR+AR-NOMPC::GFP	-5.62563	0.07478
AR+AR-NOMPC::GFP	-5.52553	0.07378
AR+AR-NOMPC::GFP	-5.42543	0.0728
AR+AR-NOMPC::GFP	-5.32533	0.07182
AR+AR-NOMPC::GFP	-5.22523	0.07086
AR+AR-NOMPC::GFP	-5.12513	0.06991
AR+AR-NOMPC::GFP	-5.02503	0.06898
AR+AR-NOMPC::GFP	-4.92492	0.06805
AR+AR-NOMPC::GFP	-4.92311	0.06803
AR+AR-NOMPC::GFP	-4.82482	0.06714
AR+AR-NOMPC::GFP	-4.72472	0.06623
AR+AR-NOMPC::GFP	-4.62462	0.06534
AR+AR-NOMPC::GFP	-4.52452	0.06446
AR+AR-NOMPC::GFP	-4.42442	0.06359
AR+AR-NOMPC::GFP	-4.41887	0.06355
AR+AR-NOMPC::GFP	-4.32432	0.06274
AR+AR-NOMPC::GFP	-4.22422	0.06189
AR+AR-NOMPC::GFP	-4.12412	0.06105
AR+AR-NOMPC::GFP	-4.02402	0.06023
AR+AR-NOMPC::GFP	-3.92392	0.05941
AR+AR-NOMPC::GFP	-3.82382	0.0586
AR+AR-NOMPC::GFP	-3.72372	0.05781
AR+AR-NOMPC::GFP	-3.62362	0.05702
AR+AR-NOMPC::GFP	-3.52352	0.05625
AR+AR-NOMPC::GFP	-3.42342	0.05548
AR+AR-NOMPC::GFP	-3.32332	0.05473
AR+AR-NOMPC::GFP	-3.22322	0.05398
AR+AR-NOMPC::GFP	-3.12312	0.05325
AR+AR-NOMPC::GFP	-3.02302	0.05252
AR+AR-NOMPC::GFP	-2.92292	0.0518
AR+AR-NOMPC::GFP	-2.82282	0.0511
AR+AR-NOMPC::GFP	-2.72272	0.0504
AR+AR-NOMPC::GFP	-2.66085	0.04997
AR+AR-NOMPC::GFP	-2.62262	0.04971
AR+AR-NOMPC::GFP	-2.52252	0.04903
AR+AR-NOMPC::GFP	-2.42242	0.04836
AR+AR-NOMPC::GFP	-2.32232	0.04769
AR+AR-NOMPC::GFP	-2.2756	0.04739
AR+AR-NOMPC::GFP	-2.22222	0.04704
AR+AR-NOMPC::GFP	-2.12212	0.04639
AR+AR-NOMPC::GFP	-2.02202	0.04576
AR+AR-NOMPC::GFP	-1.92192	0.04513
AR+AR-NOMPC::GFP	-1.82182	0.04451
AR+AR-NOMPC::GFP	-1.72172	0.04389
AR+AR-NOMPC::GFP	-1.62162	0.04329
AR+AR-NOMPC::GFP	-1.52152	0.04269
AR+AR-NOMPC::GFP	-1.42142	0.0421
AR+AR-NOMPC::GFP	-1.32132	0.04152
AR+AR-NOMPC::GFP	-1.22122	0.04095
AR+AR-NOMPC::GFP	-1.12112	0.04038
AR+AR-NOMPC::GFP	-1.02102	0.03982
AR+AR-NOMPC::GFP	-0.92092	0.03927
AR+AR-NOMPC::GFP	-0.82082	0.03873
AR+AR-NOMPC::GFP	-0.72072	0.03819
AR+AR-NOMPC::GFP	-0.62062	0.03766
AR+AR-NOMPC::GFP	-0.52052	0.03714
AR+AR-NOMPC::GFP	-0.42042	0.03663
AR+AR-NOMPC::GFP	-0.32032	0.03612
AR+AR-NOMPC::GFP	-0.22022	0.03562
AR+AR-NOMPC::GFP	-0.12012	0.03512
AR+AR-NOMPC::GFP	-0.02002	0.03463
AR+AR-NOMPC::GFP	0.06591	0.03422
AR+AR-NOMPC::GFP	0.08008	0.03415
AR+AR-NOMPC::GFP	0.18018	0.03368
AR+AR-NOMPC::GFP	0.28028	0.03321
AR+AR-NOMPC::GFP	0.38038	0.03275
AR+AR-NOMPC::GFP	0.48048	0.03229
AR+AR-NOMPC::GFP	0.58058	0.03184
AR+AR-NOMPC::GFP	0.68068	0.0314
AR+AR-NOMPC::GFP	0.78078	0.03096
AR+AR-NOMPC::GFP	0.88088	0.03053
AR+AR-NOMPC::GFP	0.98098	0.0301
AR+AR-NOMPC::GFP	1.08108	0.02968
AR+AR-NOMPC::GFP	1.12824	0.02948
AR+AR-NOMPC::GFP	1.18118	0.02926
AR+AR-NOMPC::GFP	1.28128	0.02885
AR+AR-NOMPC::GFP	1.38138	0.02845
AR+AR-NOMPC::GFP	1.48148	0.02805
AR+AR-NOMPC::GFP	1.58158	0.02766
AR+AR-NOMPC::GFP	1.68168	0.02727
AR+AR-NOMPC::GFP	1.78178	0.02689
AR+AR-NOMPC::GFP	1.88188	0.02651
AR+AR-NOMPC::GFP	1.9387	0.0263
AR+AR-NOMPC::GFP	1.98198	0.02614
AR+AR-NOMPC::GFP	2.08208	0.02577
AR+AR-NOMPC::GFP	2.18218	0.02541
AR+AR-NOMPC::GFP	2.28228	0.02506
AR+AR-NOMPC::GFP	2.38238	0.0247
AR+AR-NOMPC::GFP	2.48248	0.02436
AR+AR-NOMPC::GFP	2.58258	0.02402
AR+AR-NOMPC::GFP	2.68268	0.02368
AR+AR-NOMPC::GFP	2.74461	0.02347
AR+AR-NOMPC::GFP	2.78278	0.02334
AR+AR-NOMPC::GFP	2.88288	0.02302
AR+AR-NOMPC::GFP	2.98298	0.02269
AR+AR-NOMPC::GFP	3.08308	0.02237
AR+AR-NOMPC::GFP	3.18318	0.02206
AR+AR-NOMPC::GFP	3.28328	0.02175
AR+AR-NOMPC::GFP	3.38338	0.02144
AR+AR-NOMPC::GFP	3.48348	0.02114
AR+AR-NOMPC::GFP	3.58358	0.02084
AR+AR-NOMPC::GFP	3.68368	0.02055
AR+AR-NOMPC::GFP	3.78378	0.02026
AR+AR-NOMPC::GFP	3.88388	0.01997
AR+AR-NOMPC::GFP	3.98398	0.01969
AR+AR-NOMPC::GFP	4.08408	0.01941
AR+AR-NOMPC::GFP	4.18418	0.01914
AR+AR-NOMPC::GFP	4.28428	0.01887
AR+AR-NOMPC::GFP	4.38438	0.0186
AR+AR-NOMPC::GFP	4.48448	0.01834
AR+AR-NOMPC::GFP	4.58458	0.01808
AR+AR-NOMPC::GFP	4.68468	0.01782
AR+AR-NOMPC::GFP	4.78478	0.01757
AR+AR-NOMPC::GFP	4.88488	0.01732
AR+AR-NOMPC::GFP	4.98498	0.01708
AR+AR-NOMPC::GFP	5.08509	0.01683
AR+AR-NOMPC::GFP	5.18519	0.0166
AR+AR-NOMPC::GFP	5.28529	0.01636
AR+AR-NOMPC::GFP	5.38539	0.01613
AR+AR-NOMPC::GFP	5.48549	0.0159
AR+AR-NOMPC::GFP	5.58559	0.01568
AR+AR-NOMPC::GFP	5.68569	0.01545
AR+AR-NOMPC::GFP	5.78579	0.01523
AR+AR-NOMPC::GFP	5.88589	0.01502
AR+AR-NOMPC::GFP	5.98599	0.01481
AR+AR-NOMPC::GFP	6.08609	0.01459
AR+AR-NOMPC::GFP	6.17674	0.01441
AR+AR-NOMPC::GFP	6.18619	0.01439
AR+AR-NOMPC::GFP	6.28629	0.01418
AR+AR-NOMPC::GFP	6.38639	0.01398
AR+AR-NOMPC::GFP	6.48649	0.01378
AR+AR-NOMPC::GFP	6.58659	0.01359
AR+AR-NOMPC::GFP	6.68669	0.01339
AR+AR-NOMPC::GFP	6.78679	0.0132
AR+AR-NOMPC::GFP	6.88689	0.01302
AR+AR-NOMPC::GFP	6.98699	0.01283
AR+AR-NOMPC::GFP	7.08709	0.01265
AR+AR-NOMPC::GFP	7.18719	0.01247
AR+AR-NOMPC::GFP	7.28729	0.01229
AR+AR-NOMPC::GFP	7.38739	0.01212
AR+AR-NOMPC::GFP	7.48749	0.01195
AR+AR-NOMPC::GFP	7.58759	0.01178
AR+AR-NOMPC::GFP	7.68769	0.01161
AR+AR-NOMPC::GFP	7.78779	0.01144
AR+AR-NOMPC::GFP	7.88789	0.01128
AR+AR-NOMPC::GFP	7.98799	0.01112
AR+AR-NOMPC::GFP	8.08809	0.01096
AR+AR-NOMPC::GFP	8.18819	0.0108
AR+AR-NOMPC::GFP	8.28829	0.01065
AR+AR-NOMPC::GFP	8.38839	0.0105
AR+AR-NOMPC::GFP	8.48849	0.01035
AR+AR-NOMPC::GFP	8.58859	0.0102
AR+AR-NOMPC::GFP	8.68869	0.01006
AR+AR-NOMPC::GFP	8.78879	0.00991
AR+AR-NOMPC::GFP	8.85409	0.00982
AR+AR-NOMPC::GFP	8.86821	0.0098
AR+AR-NOMPC::GFP	8.88889	0.00977
AR+AR-NOMPC::GFP	8.98899	0.00963
AR+AR-NOMPC::GFP	9.08909	0.00949
AR+AR-NOMPC::GFP	9.18919	0.00936
AR+AR-NOMPC::GFP	9.28929	0.00923
AR+AR-NOMPC::GFP	9.38939	0.00909
AR+AR-NOMPC::GFP	9.48949	0.00896
AR+AR-NOMPC::GFP	9.58959	0.00884
AR+AR-NOMPC::GFP	9.68969	0.00871
AR+AR-NOMPC::GFP	9.78979	0.00859
AR+AR-NOMPC::GFP	9.88989	0.00846
AR+AR-NOMPC::GFP	9.98999	0.00834
AR+AR-NOMPC::GFP	10.0901	0.00822
AR+AR-NOMPC::GFP	10.1902	0.00811
AR+AR-NOMPC::GFP	10.2903	0.00799
AR+AR-NOMPC::GFP	10.3904	0.00788
AR+AR-NOMPC::GFP	10.4905	0.00776
AR+AR-NOMPC::GFP	10.5906	0.00765
AR+AR-NOMPC::GFP	10.6907	0.00754
AR+AR-NOMPC::GFP	10.7908	0.00744
AR+AR-NOMPC::GFP	10.8909	0.00733
AR+AR-NOMPC::GFP	10.991	0.00722
AR+AR-NOMPC::GFP	11.0911	0.00712
AR+AR-NOMPC::GFP	11.1912	0.00702
AR+AR-NOMPC::GFP	11.2913	0.00692
AR+AR-NOMPC::GFP	11.3914	0.00682
AR+AR-NOMPC::GFP	11.4915	0.00672
AR+AR-NOMPC::GFP	11.5916	0.00663
AR+AR-NOMPC::GFP	11.6917	0.00653
AR+AR-NOMPC::GFP	11.7918	0.00644
AR+AR-NOMPC::GFP	11.8919	0.00635
AR+AR-NOMPC::GFP	11.992	0.00626
AR+AR-NOMPC::GFP	12.0921	0.00617
AR+AR-NOMPC::GFP	12.1922	0.00608
AR+AR-NOMPC::GFP	12.2923	0.00599
AR+AR-NOMPC::GFP	12.3924	0.0059
AR+AR-NOMPC::GFP	12.4925	0.00582
AR+AR-NOMPC::GFP	12.5926	0.00574
AR+AR-NOMPC::GFP	12.6927	0.00565
AR+AR-NOMPC::GFP	12.7928	0.00557
AR+AR-NOMPC::GFP	12.8929	0.00549
AR+AR-NOMPC::GFP	12.993	0.00542
AR+AR-NOMPC::GFP	13.0931	0.00534
AR+AR-NOMPC::GFP	13.1932	0.00526
AR+AR-NOMPC::GFP	13.2933	0.00519
AR+AR-NOMPC::GFP	13.3934	0.00511
AR+AR-NOMPC::GFP	13.4935	0.00504
AR+AR-NOMPC::GFP	13.5936	0.00497
AR+AR-NOMPC::GFP	13.6937	0.0049
AR+AR-NOMPC::GFP	13.7938	0.00482
AR+AR-NOMPC::GFP	13.8939	0.00476
AR+AR-NOMPC::GFP	13.994	0.00469
AR+AR-NOMPC::GFP	14.0941	0.00462
AR+AR-NOMPC::GFP	14.1942	0.00455
AR+AR-NOMPC::GFP	14.2943	0.00449
AR+AR-NOMPC::GFP	14.3944	0.00442
AR+AR-NOMPC::GFP	14.4945	0.00436
AR+AR-NOMPC::GFP	14.5946	0.0043
AR+AR-NOMPC::GFP	14.6947	0.00424
AR+AR-NOMPC::GFP	14.7948	0.00418
AR+AR-NOMPC::GFP	14.8949	0.00412
AR+AR-NOMPC::GFP	14.995	0.00406
AR+AR-NOMPC::GFP	15.0951	0.004
AR+AR-NOMPC::GFP	15.1952	0.00394
AR+AR-NOMPC::GFP	15.2953	0.00389
AR+AR-NOMPC::GFP	15.3954	0.00383
AR+AR-NOMPC::GFP	15.4955	0.00377
AR+AR-NOMPC::GFP	15.5956	0.00372
AR+AR-NOMPC::GFP	15.6957	0.00367
AR+AR-NOMPC::GFP	15.7958	0.00361
AR+AR-NOMPC::GFP	15.8959	0.00356
AR+AR-NOMPC::GFP	15.9076	0.00356
AR+AR-NOMPC::GFP	15.996	0.00351
AR+AR-NOMPC::GFP	16.0961	0.00346
AR+AR-NOMPC::GFP	16.1962	0.00341
AR+AR-NOMPC::GFP	16.2963	0.00336
AR+AR-NOMPC::GFP	16.3278	0.00335
AR+AR-NOMPC::GFP	16.3964	0.00331
AR+AR-NOMPC::GFP	16.4965	0.00327
AR+AR-NOMPC::GFP	16.5966	0.00322
AR+AR-NOMPC::GFP	16.6967	0.00317
AR+AR-NOMPC::GFP	16.7968	0.00313
AR+AR-NOMPC::GFP	16.8969	0.00308
AR+AR-NOMPC::GFP	16.997	0.00304
AR+AR-NOMPC::GFP	17.0971	0.003
AR+AR-NOMPC::GFP	17.1972	0.00295
AR+AR-NOMPC::GFP	17.2973	0.00291
AR+AR-NOMPC::GFP	17.3974	0.00287
AR+AR-NOMPC::GFP	17.4975	0.00283
AR+AR-NOMPC::GFP	17.5976	0.00279
AR+AR-NOMPC::GFP	17.6977	0.00275
AR+AR-NOMPC::GFP	17.7978	0.00271
AR+AR-NOMPC::GFP	17.8979	0.00267
AR+AR-NOMPC::GFP	17.998	0.00263
AR+AR-NOMPC::GFP	18.0981	0.00259
AR+AR-NOMPC::GFP	18.1982	0.00255
AR+AR-NOMPC::GFP	18.2983	0.00252
AR+AR-NOMPC::GFP	18.3984	0.00248
AR+AR-NOMPC::GFP	18.4985	0.00245
AR+AR-NOMPC::GFP	18.5986	0.00241
AR+AR-NOMPC::GFP	18.6987	0.00238
AR+AR-NOMPC::GFP	18.7988	0.00234
AR+AR-NOMPC::GFP	18.8989	0.00231
AR+AR-NOMPC::GFP	18.999	0.00228
AR+AR-NOMPC::GFP	19.0991	0.00224
AR+AR-NOMPC::GFP	19.1992	0.00221
AR+AR-NOMPC::GFP	19.2993	0.00218
AR+AR-NOMPC::GFP	19.3994	0.00215
AR+AR-NOMPC::GFP	19.4995	0.00212
AR+AR-NOMPC::GFP	19.5996	0.00209
AR+AR-NOMPC::GFP	19.6997	0.00206
AR+AR-NOMPC::GFP	19.7998	0.00203
AR+AR-NOMPC::GFP	19.8999	0.002
[truncated: 2,001 more rows]

## Sheet: Suppl_Fig1_c
construct	stimulus_pressure_mmHg	normalized_current
NOMPC::GFP	-43.3215	1
NOMPC::GFP	-36.4378	0.42942
NOMPC::GFP	-28.6151	0.58623
NOMPC::GFP	-21.6108	0.37098
NOMPC::GFP	-13.896	0.12489
NOMPC::GFP	-6.84839	0.10733
NOMPC::GFP	0.0358	0.08742
NOMPC::GFP	7.02002	0.02157
NOMPC::GFP	14.8276	0
NOMPC::GFP	-56.7792	1
NOMPC::GFP	-48.1399	0.89365
NOMPC::GFP	-39.7969	0.59112
NOMPC::GFP	-31.1264	0.37101
NOMPC::GFP	-22.4403	0.29462
NOMPC::GFP	-13.5827	0.2501
NOMPC::GFP	-5.05258	0.10824
NOMPC::GFP	12.4287	0.04086
NOMPC::GFP	-33.8087	0.87071
NOMPC::GFP	-26.027	0.67935
NOMPC::GFP	-16.7484	0.37643
NOMPC::GFP	-8.38978	0.33972
NOMPC::GFP	0.5458	0.17851
NOMPC::GFP	8.96678	0.000176812
NOMPC::GFP	18.1675	0
NOMPC::GFP	-54.0142	0.92796
NOMPC::GFP	-46.2064	1
NOMPC::GFP	-38.608	0.77824
NOMPC::GFP	-31.3389	0.50818
NOMPC::GFP	-23.8582	0.24134
NOMPC::GFP	-16.6343	0.1189
NOMPC::GFP	-8.95301	0.03465
NOMPC::GFP	-1.8529	0
NOMPC::GFP	4.51487	0.0233
NOMPC::GFP	-44.0135	0.92796
NOMPC::GFP	-36.2539	1
NOMPC::GFP	-29.2292	0.77824
NOMPC::GFP	-21.5574	0.50818
NOMPC::GFP	-14.364	0.24134
NOMPC::GFP	-6.81645	0.1189
NOMPC::GFP	0.10642	0.03465
NOMPC::GFP	7.02423	0
NOMPC::GFP	-51.2242	0.91127
NOMPC::GFP	-44.1665	1
NOMPC::GFP	-36.3599	0.79089
NOMPC::GFP	-29.3745	0.51156
NOMPC::GFP	-21.6135	0.39726
NOMPC::GFP	-14.4624	0.31407
NOMPC::GFP	-6.83197	0.02125
NOMPC::GFP	0.0778	0
NOMPC::GFP	1.98666	0.01261
NOMPC::GFP	-4.40694	0
NOMPC::GFP	-11.8245	0.1119
NOMPC::GFP	-18.7523	0.28023
NOMPC::GFP	-26.2952	0.412
NOMPC::GFP	-33.5091	0.7281
NOMPC::GFP	-40.4057	1
NOMPC::GFP	8.91258	0
NOMPC::GFP	1.97604	0.0672
NOMPC::GFP	-4.42823	0.12146
NOMPC::GFP	-11.8131	0.31186
NOMPC::GFP	-18.7178	0.56327
NOMPC::GFP	-26.2787	0.91257
NOMPC::GFP	-33.4602	1
NOMPC::GFP	8.92993	0
NOMPC::GFP	1.9666	0.00514
NOMPC::GFP	-4.41438	0.05203
NOMPC::GFP	-11.8181	0.2242
NOMPC::GFP	-18.7363	0.39546
NOMPC::GFP	-26.2948	0.61831
NOMPC::GFP	-33.4477	0.80725
NOMPC::GFP	-40.3501	1
NOMPC::GFP	-47.9485	0.9771
AR+AR-NOMPC::GFP	-43.3906	1
AR+AR-NOMPC::GFP	-36.4052	0.91373
AR+AR-NOMPC::GFP	-28.5826	0.2038
AR+AR-NOMPC::GFP	-21.5828	0.22833
AR+AR-NOMPC::GFP	-13.8088	0.59342
AR+AR-NOMPC::GFP	-6.74019	0.00787
AR+AR-NOMPC::GFP	0.06591	0.01113
AR+AR-NOMPC::GFP	-2.66085	0.1604
AR+AR-NOMPC::GFP	-7.6502	0.14984
AR+AR-NOMPC::GFP	-12.591	0.03245
AR+AR-NOMPC::GFP	-17.3475	0
AR+AR-NOMPC::GFP	-22.3279	0.14326
AR+AR-NOMPC::GFP	-27.3291	0.18995
AR+AR-NOMPC::GFP	-31.8254	1
AR+AR-NOMPC::GFP	-36.8607	0.98103
AR+AR-NOMPC::GFP	8.85409	0.00522
AR+AR-NOMPC::GFP	1.12824	0.000311101
AR+AR-NOMPC::GFP	-4.92311	0
AR+AR-NOMPC::GFP	-12.5899	0.12544
AR+AR-NOMPC::GFP	-19.5599	0.47564
AR+AR-NOMPC::GFP	-27.2786	1
AR+AR-NOMPC::GFP	15.9076	0.05963
AR+AR-NOMPC::GFP	6.17674	0.07031
AR+AR-NOMPC::GFP	-2.2756	0.01767
AR+AR-NOMPC::GFP	-12.2329	0.39887
AR+AR-NOMPC::GFP	-21.8309	0.58599
AR+AR-NOMPC::GFP	-31.5627	1
AR+AR-NOMPC::GFP	-81.7448	0.78661
AR+AR-NOMPC::GFP	16.3278	0.07045
AR+AR-NOMPC::GFP	8.86821	0
AR+AR-NOMPC::GFP	1.9387	0.42692
AR+AR-NOMPC::GFP	-4.41887	0.08213
AR+AR-NOMPC::GFP	-11.8704	0.29689
AR+AR-NOMPC::GFP	-18.7556	0.51405
AR+AR-NOMPC::GFP	-26.2258	0.95174
AR+AR-NOMPC::GFP	-40.4153	1
AR+AR-NOMPC::GFP	2.74461	0
AR+AR-NOMPC::GFP	-5.76993	0.00973
AR+AR-NOMPC::GFP	-14.534	0.18598
AR+AR-NOMPC::GFP	-18.7556	0.25976
AR+AR-NOMPC::GFP	-26.2258	0.63837
AR+AR-NOMPC::GFP	-33.4742	0.78678
AR+AR-NOMPC::GFP	-41.8254	1
LH+LH-NOMPC::GFP	-73.8464	0.90184
LH+LH-NOMPC::GFP	-66.1793	1
LH+LH-NOMPC::GFP	-59.0663	0.74653
LH+LH-NOMPC::GFP	-51.2336	0.79681
LH+LH-NOMPC::GFP	-43.3906	0.72223
LH+LH-NOMPC::GFP	-36.4052	0.65992
LH+LH-NOMPC::GFP	-28.5826	0.14719
LH+LH-NOMPC::GFP	-21.5828	0.1649
LH+LH-NOMPC::GFP	-13.8088	0.02858
LH+LH-NOMPC::GFP	-6.74019	0.00568
LH+LH-NOMPC::GFP	0.06591	0.00804
LH+LH-NOMPC::GFP	7.13971	0
LH+LH-NOMPC::GFP	1.1099	0
LH+LH-NOMPC::GFP	-4.91884	0.08358
LH+LH-NOMPC::GFP	-12.6119	0.19433
LH+LH-NOMPC::GFP	-19.6096	0.12976
LH+LH-NOMPC::GFP	-27.2208	0.25076
LH+LH-NOMPC::GFP	-34.3158	0.34634
LH+LH-NOMPC::GFP	-41.4447	0.47537
LH+LH-NOMPC::GFP	-49.1084	1
LH+LH-NOMPC::GFP	1.90323	0.04016
LH+LH-NOMPC::GFP	-4.5794	0
LH+LH-NOMPC::GFP	-11.8832	0.06472
LH+LH-NOMPC::GFP	-18.8175	0.30485
LH+LH-NOMPC::GFP	-26.4494	0.33849
LH+LH-NOMPC::GFP	-33.5471	0.35118
LH+LH-NOMPC::GFP	-40.495	0.58599
LH+LH-NOMPC::GFP	-48.1834	1
LH+LH-NOMPC::GFP	1.90562	0.01019
LH+LH-NOMPC::GFP	-4.36833	0.07731
LH+LH-NOMPC::GFP	-11.9141	0
LH+LH-NOMPC::GFP	-18.7953	0.0599
LH+LH-NOMPC::GFP	-26.2361	0.14638
LH+LH-NOMPC::GFP	-33.5906	0.30838
LH+LH-NOMPC::GFP	-47.938	0.75736
LH+LH-NOMPC::GFP	-55.3513	0.96256
LH+LH-NOMPC::GFP	-63.0881	1
LH+LH-NOMPC::GFP	1.92456	0.01855
LH+LH-NOMPC::GFP	-4.40704	0
LH+LH-NOMPC::GFP	-11.8886	0.16961
LH+LH-NOMPC::GFP	-18.7851	0.00944
LH+LH-NOMPC::GFP	-26.2857	0.17195
LH+LH-NOMPC::GFP	-33.5661	0.24726
LH+LH-NOMPC::GFP	-40.4772	0.30734
LH+LH-NOMPC::GFP	-47.9764	0.63598
LH+LH-NOMPC::GFP	-55.229	1
LH+LH-NOMPC::GFP	0.95928	0
LH+LH-NOMPC::GFP	-5.79712	0.00728
LH+LH-NOMPC::GFP	-12.8585	0.03822
LH+LH-NOMPC::GFP	-20.684	0.32278
LH+LH-NOMPC::GFP	-28.1538	0.5794
LH+LH-NOMPC::GFP	-35.5198	0.57741
LH+LH-NOMPC::GFP	-43.3435	1
LH+LH-NOMPC::GFP	3.4483	0.03037
LH+LH-NOMPC::GFP	-3.08136	0.01632
LH+LH-NOMPC::GFP	-10.8706	0
LH+LH-NOMPC::GFP	-18.0269	0.15066
LH+LH-NOMPC::GFP	-25.7884	0.14918
LH+LH-NOMPC::GFP	-33.2721	0.15867
LH+LH-NOMPC::GFP	-40.603	0.59192
LH+LH-NOMPC::GFP	-48.5124	1
LH+LHcys-NOMPC::GFP	1.4481	0.10063
LH+LHcys-NOMPC::GFP	-4.9361	0.06709
LH+LHcys-NOMPC::GFP	-12.1262	0.01738
LH+LHcys-NOMPC::GFP	-19.6985	0
LH+LHcys-NOMPC::GFP	-26.713	0.04385
LH+LHcys-NOMPC::GFP	-34.4576	0.07863
LH+LHcys-NOMPC::GFP	-41.3556	0.09789
LH+LHcys-NOMPC::GFP	-49.246	0.68755
LH+LHcys-NOMPC::GFP	-56.5645	1
LH+LHcys-NOMPC::GFP	1.94196	0
LH+LHcys-NOMPC::GFP	-4.42457	0.00301
LH+LHcys-NOMPC::GFP	-11.8794	0.10912
LH+LHcys-NOMPC::GFP	-26.3536	0.28792
LH+LHcys-NOMPC::GFP	-33.5921	0.71044
LH+LHcys-NOMPC::GFP	-40.4066	1
LH+LHcys-NOMPC::GFP	1.94557	0.00601
LH+LHcys-NOMPC::GFP	-4.4679	0.11158
LH+LHcys-NOMPC::GFP	-11.8537	0
LH+LHcys-NOMPC::GFP	-18.7938	0.04885
LH+LHcys-NOMPC::GFP	-26.3446	0.23657
LH+LHcys-NOMPC::GFP	-33.5903	0.42127
LH+LHcys-NOMPC::GFP	-40.5034	1
LH+LHcys-NOMPC::GFP	-47.9771	0.95214
LH+LHcys-NOMPC::GFP	1.96072	0.00582
LH+LHcys-NOMPC::GFP	-4.2291	0.00368
LH+LHcys-NOMPC::GFP	-11.8394	0.0183
LH+LHcys-NOMPC::GFP	-18.7191	0
LH+LHcys-NOMPC::GFP	-26.0694	0.12558
LH+LHcys-NOMPC::GFP	-33.5816	0.49787
LH+LHcys-NOMPC::GFP	-40.4875	0.58559
LH+LHcys-NOMPC::GFP	-47.7723	1
LH+LHcys-NOMPC::GFP	-55.3495	0.73911
LH+LHcys-NOMPC::GFP	8.65031	0.00557
LH+LHcys-NOMPC::GFP	0.95739	0.00572
LH+LHcys-NOMPC::GFP	-5.77051	0.0275
LH+LHcys-NOMPC::GFP	-12.9048	0
LH+LHcys-NOMPC::GFP	-20.744	0.0547
LH+LHcys-NOMPC::GFP	-28.0841	0.0121
LH+LHcys-NOMPC::GFP	-35.612	0.09027
LH+LHcys-NOMPC::GFP	-43.423	0.29195
LH+LHcys-NOMPC::GFP	-50.5392	0.66853
LH+LHcys-NOMPC::GFP	-58.4995	1
LH+LHcys-NOMPC::GFP	-66.2457	0.66853
LH+LHcys-NOMPC::GFP	8.65031	0.00557
LH+LHcys-NOMPC::GFP	0.95739	0.00572
LH+LHcys-NOMPC::GFP	-5.77051	0.0275
LH+LHcys-NOMPC::GFP	-12.9048	0
LH+LHcys-NOMPC::GFP	-20.744	0.0547
LH+LHcys-NOMPC::GFP	-28.0841	0.0121
LH+LHcys-NOMPC::GFP	-35.612	0.09027
LH+LHcys-NOMPC::GFP	-43.423	0.29195
LH+LHcys-NOMPC::GFP	-50.5392	0.66853
LH+LHcys-NOMPC::GFP	-58.4995	1
LH+LHcys-NOMPC::GFP	0.99656	0.02149
LH+LHcys-NOMPC::GFP	-5.85505	0
LH+LHcys-NOMPC::GFP	-12.8808	0.05617
LH+LHcys-NOMPC::GFP	-20.718	0.01803
LH+LHcys-NOMPC::GFP	-28.3681	0.21563
LH+LHcys-NOMPC::GFP	-35.5676	0.28296
LH+LHcys-NOMPC::GFP	-43.4976	1
